# Supplementary material for: Transcriptome signatures associated with meningioma progression
Source: Springer Nature journal article supplement (doi:10.1186/s40478-019-0690-x), 2019-04-30

## Supplementary Material

**Supplementary Figure 1:** Unsupervised clustering of the RNA-seq data obtained from grade-specific tumor samples only.

a) Cluster dendrogram for all the grade I meningioma samples.

b) Cluster dendrogram for all the grade II meningioma samples.

**Supplementary Figure 2:** GSEA analysis shows the significant correlation of the genes up-regulated in grade IP vs INP tumors with those gene sets associated with 'Hypoxia,' 'EGF signaling,' 'HRAS oncogenic,' 'Tumor angiogenesis' and 'TGF $\beta$  signaling Down.'

**Supplementary Table 1:** List of significantly differentially expressed genes between grade INP and IP meningiomas, as identified by RNA-seq.

**Supplementary Table 2:** List of significantly differentially expressed genes between all grade I and all grade II meningiomas, as identified by RNA-seq.

**Supplementary Table 3:** List of significantly differentially expressed genes between all grade I and all grade III meningiomas, as identified by RNA-seq.

**Supplementary Table 4:** List of significantly differentially expressed genes between all grade I and grade II and III meningiomas, as identified by RNA-seq.

**Supplementary Table 5:** List of significantly differentially expressed genes between grade II S. and II DN meningiomas, as identified by RNA-seq.

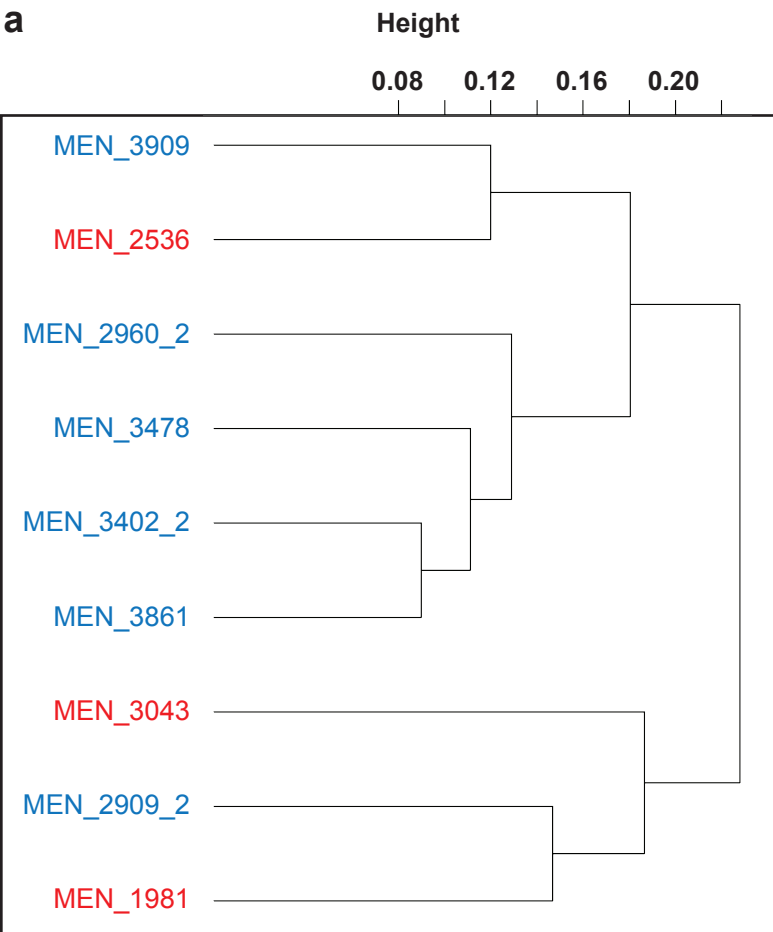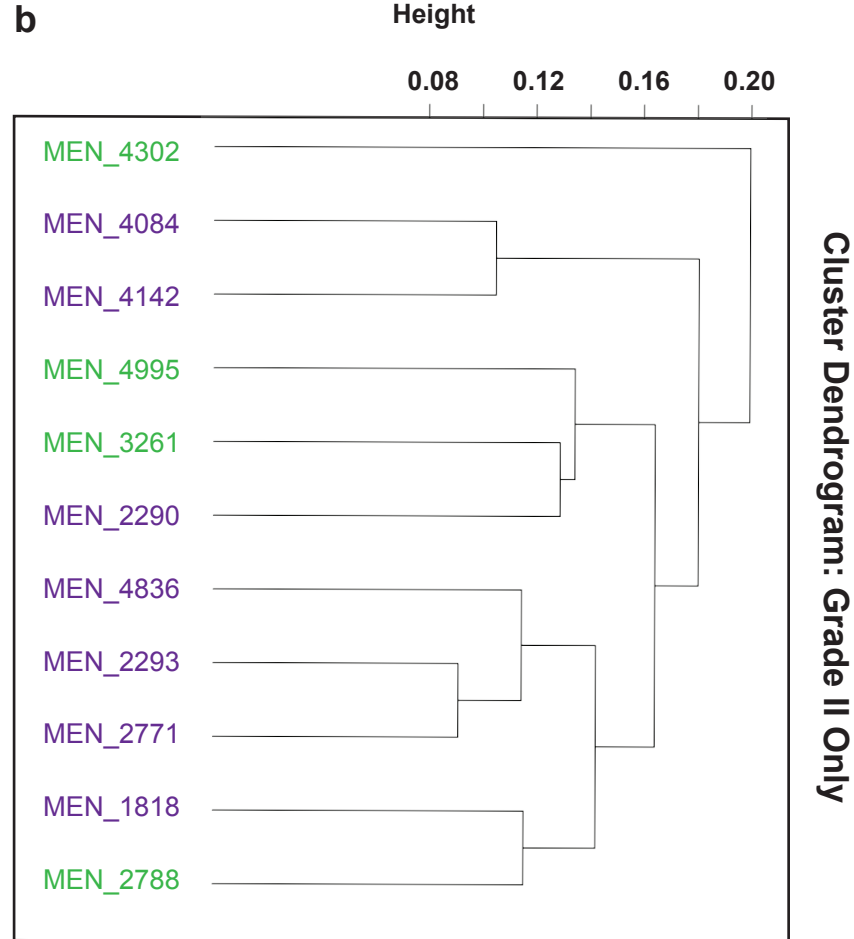

- Grade INP (never progressed)
- Grade IP (progressed)
- Grade II S. ("secondary" grade II)
- Grade II DN ("de novo" grade II)

**WINTER HYPOXIA UP**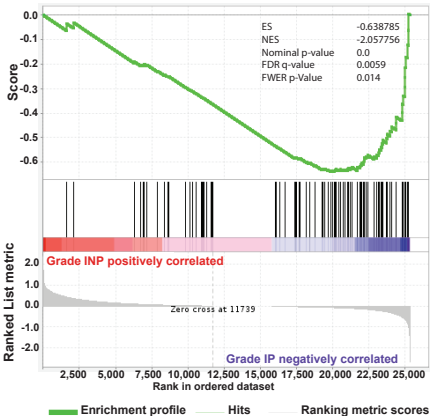**HARRIS HYPOXIA**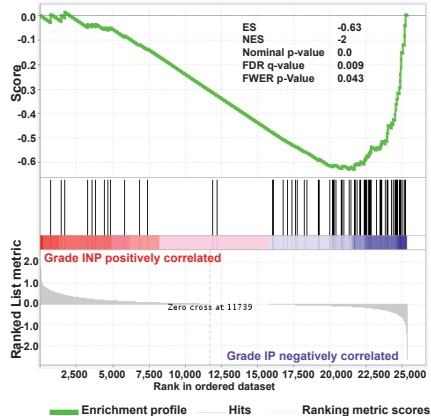**MENSE HYPOXIA\_UP**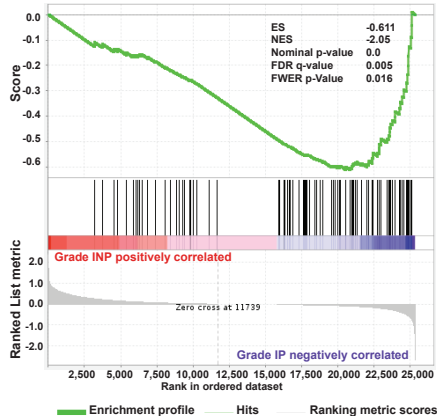**SEMENZA HIF1 TARGETS**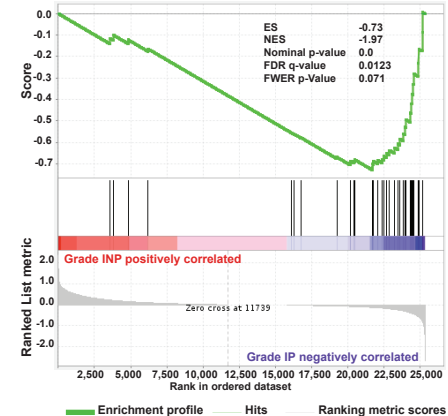**NAGASHIMA EGF SIGNALING UP**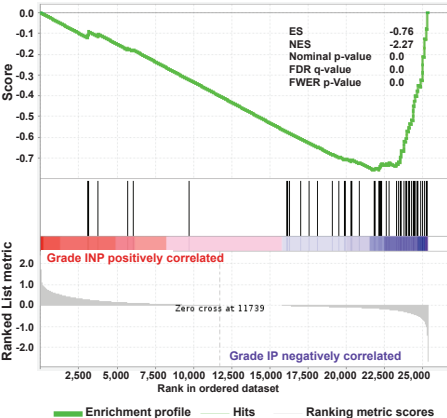**BILD HRAS ONCOGENIC SIGNATURE**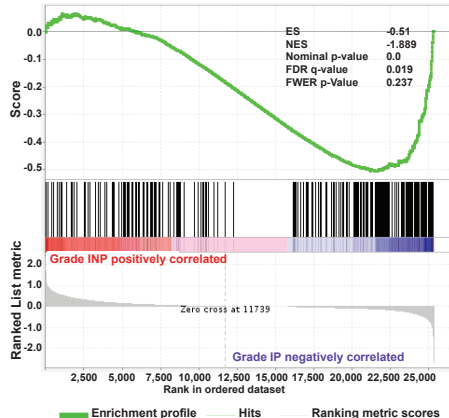**LU TUMOR ANGIOGENESIS UP**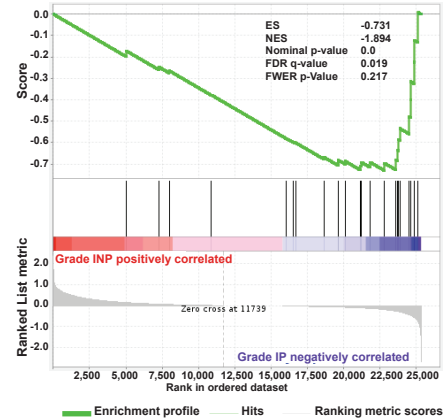**JAZAG TGFB1 SIGNALING DN**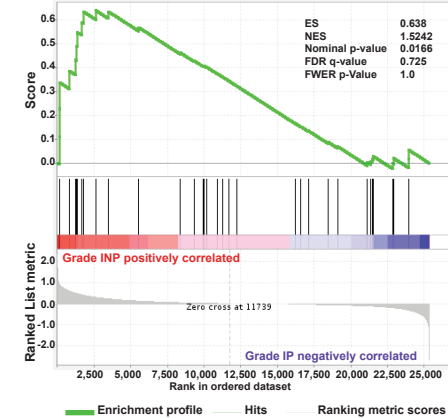

Supplement: MOESM1 [file 25666702]
