# Supplementary material for: Transcriptome signatures associated with meningioma progression
Source: Springer Nature journal article supplement (doi:10.1186/s40478-019-0690-x), 2019-04-30
Supplement: MOESM2 [file 25666702]

**Supplementary Table 1: Differentially expressed genes between GR INP and GR IP meningiomas**

| Gene       | baseMean   | log2FoldCha | pvalue    | padj      |
|------------|------------|-------------|-----------|-----------|
| RNA5-8S5   | 885.336646 | -9.8466041  | 1.52E-144 | 2.34E-140 |
| DNM3OS     | 828.771988 | 6.18663848  | 3.43E-58  | 2.64E-54  |
| TENM2      | 6824.41363 | 4.90394961  | 3.78E-33  | 1.94E-29  |
| PLA2G2A    | 139.09861  | -7.5651604  | 5.19E-23  | 1.99E-19  |
| MANBAL     | 564.732921 | -1.6452591  | 3.10E-20  | 9.51E-17  |
| CTTNBP2    | 336.049479 | 3.11484964  | 2.57E-18  | 6.58E-15  |
| P2RY14     | 160.68115  | 4.12019978  | 1.55E-16  | 3.39E-13  |
| U2AF1      | 573.471554 | -1.9691871  | 1.94E-16  | 3.73E-13  |
| SNORA54    | 182.314513 | 3.33873547  | 2.38E-16  | 4.06E-13  |
| CHMP4B     | 1711.48836 | -1.7366269  | 1.32E-15  | 2.03E-12  |
| DPYSL4     | 138.510643 | 3.99572332  | 3.78E-15  | 5.28E-12  |
| COL9A3     | 4653.86591 | -3.096956   | 1.85E-14  | 2.36E-11  |
| RAPGEFL1   | 279.953527 | -2.0366165  | 2.71E-14  | 3.20E-11  |
| LOC1019293 | 143.425589 | 5.60726059  | 5.04E-14  | 5.17E-11  |
| SAFB       | 1273.46186 | -0.8654561  | 4.96E-14  | 5.17E-11  |
| NOP56      | 1254.01513 | -1.0083777  | 6.17E-14  | 5.92E-11  |
| RPL28      | 4946.35932 | -1.7121877  | 1.98E-13  | 1.79E-10  |
| RAB3D      | 1463.84019 | -2.2187193  | 2.69E-13  | 2.30E-10  |
| RNA45S5    | 4296906.94 | -5.2853054  | 3.09E-13  | 2.50E-10  |
| PRSS30P    | 90.995885  | 5.16517859  | 3.90E-13  | 3.00E-10  |
| LNX1       | 204.59076  | 3.48141932  | 4.79E-13  | 3.51E-10  |
| ANP32B     | 1025.49234 | -2.0150009  | 6.76E-13  | 4.72E-10  |
| PLD4       | 399.921466 | 2.73818441  | 7.74E-13  | 5.17E-10  |
| PRR13      | 1085.75502 | -1.2511954  | 1.18E-12  | 7.57E-10  |
| DDX3Y      | 693.200041 | -5.9216418  | 3.09E-12  | 1.83E-09  |
| UTY        | 489.024406 | -5.890448   | 3.00E-12  | 1.83E-09  |
| FKBP9      | 3568.7939  | 1.22839642  | 4.10E-12  | 2.33E-09  |
| RPS4Y1     | 779.017278 | -5.8649085  | 5.73E-12  | 3.14E-09  |
| FGL2       | 38764.1816 | 4.33218652  | 7.23E-12  | 3.83E-09  |
| PI16       | 293.32581  | 5.27608057  | 9.93E-12  | 5.08E-09  |
| HDAC9      | 1058.41779 | 3.18043924  | 1.04E-11  | 5.13E-09  |
| RPL23P8    | 54.9962623 | -2.6050175  | 1.37E-11  | 6.60E-09  |
| ZFY        | 169.761813 | -5.5239122  | 1.51E-11  | 7.01E-09  |
| EMD        | 642.711971 | -1.6337243  | 1.76E-11  | 7.96E-09  |
| TEK        | 795.752892 | 2.32010306  | 1.94E-11  | 8.53E-09  |
| PDE1C      | 348.18298  | 4.12513748  | 4.14E-11  | 1.77E-08  |
| CCDC124    | 341.5989   | -1.3509962  | 5.95E-11  | 2.41E-08  |
| COL1A2     | 90688.0657 | 2.54311016  | 5.95E-11  | 2.41E-08  |
| PLP1       | 513.917414 | 4.5532474   | 6.42E-11  | 2.49E-08  |
| RAB11B     | 1012.33599 | -1.0406461  | 6.48E-11  | 2.49E-08  |
| PPDPF      | 2231.22293 | -1.7949783  | 1.06E-10  | 3.89E-08  |
| ZNF300P1   | 82.3185336 | 3.68636274  | 1.05E-10  | 3.89E-08  |
| ELN        | 6286.02073 | 4.41963246  | 1.10E-10  | 3.93E-08  |
| TENM3      | 4071.81946 | 4.77969181  | 1.21E-10  | 4.23E-08  |
| INMT       | 10896.0367 | 4.99677873  | 1.26E-10  | 4.29E-08  |
| C20orf24   | 113.123554 | -1.8776771  | 1.36E-10  | 4.44E-08  |
| PDGFRB     | 7388.86748 | 2.07580192  | 1.35E-10  | 4.44E-08  |

|            |            |            |          |          |
|------------|------------|------------|----------|----------|
| TAF15      | 886.092138 | -1.1173412 | 1.70E-10 | 5.43E-08 |
| GDF10      | 99.1980321 | 4.90736834 | 2.47E-10 | 7.75E-08 |
| CACNA1D    | 697.832396 | 4.20613414 | 2.58E-10 | 7.92E-08 |
| SUMO3      | 1387.46153 | -0.944086  | 3.50E-10 | 1.05E-07 |
| EGFL6      | 6044.57704 | 4.94592072 | 3.76E-10 | 1.11E-07 |
| MYCL       | 220.075451 | 3.20331898 | 4.64E-10 | 1.34E-07 |
| FGF12      | 96.9087083 | 2.80060331 | 4.83E-10 | 1.37E-07 |
| HM13       | 1724.67794 | -1.3776734 | 9.86E-10 | 2.75E-07 |
| TVP23C     | 516.118506 | 1.07913691 | 1.02E-09 | 2.81E-07 |
| GPC5-AS1   | 421.123985 | 4.24756768 | 1.06E-09 | 2.86E-07 |
| NFE2L3     | 144.214122 | 2.31342332 | 1.30E-09 | 3.44E-07 |
| FRY        | 1529.70968 | 2.52688132 | 1.39E-09 | 3.62E-07 |
| SNORA22    | 80.0833148 | -2.1797756 | 2.14E-09 | 5.48E-07 |
| NICN1      | 508.06881  | 1.36947137 | 2.24E-09 | 5.64E-07 |
| AMT        | 250.531065 | 1.42799535 | 2.71E-09 | 6.72E-07 |
| SPNS3      | 46.4543637 | 3.99791181 | 3.08E-09 | 7.51E-07 |
| SCPEP1     | 704.424715 | 1.4591407  | 3.15E-09 | 7.57E-07 |
| GINS3      | 70.9635736 | 2.28793464 | 3.29E-09 | 7.78E-07 |
| LMCD1-AS1  | 30.8134375 | 3.71714442 | 3.35E-09 | 7.81E-07 |
| C1orf204   | 63.6096836 | 2.25310046 | 3.41E-09 | 7.82E-07 |
| LEPREL1    | 494.967462 | 3.57498082 | 3.53E-09 | 7.85E-07 |
| NDRG4      | 123.306862 | 4.08955049 | 3.53E-09 | 7.85E-07 |
| TLE3       | 1368.42866 | -1.225536  | 3.58E-09 | 7.85E-07 |
| HOPX       | 595.180428 | -4.1787089 | 4.86E-09 | 1.05E-06 |
| SNRPA1     | 188.715106 | -1.3402391 | 6.04E-09 | 1.29E-06 |
| C1QTNF2    | 75.8739055 | 3.51349673 | 7.36E-09 | 1.53E-06 |
| LTBP1      | 5836.11589 | 2.66221755 | 7.28E-09 | 1.53E-06 |
| CEBPB      | 764.532933 | -1.6319916 | 1.45E-08 | 2.98E-06 |
| FIBIN      | 5639.37572 | 3.43823239 | 1.48E-08 | 2.99E-06 |
| C16orf86   | 70.0729878 | 2.48296861 | 1.73E-08 | 3.44E-06 |
| FBL        | 809.767675 | -1.2638973 | 1.97E-08 | 3.89E-06 |
| LOC1019270 | 82.9616562 | 3.23750769 | 2.37E-08 | 4.60E-06 |
| SPATA2     | 312.503771 | -1.1193868 | 2.46E-08 | 4.72E-06 |
| PDE1A      | 3175.88423 | 1.74106734 | 2.94E-08 | 5.50E-06 |
| SDSL       | 157.468474 | -1.2011107 | 2.93E-08 | 5.50E-06 |
| NAV3       | 495.598348 | 4.14729383 | 3.07E-08 | 5.68E-06 |
| KALRN      | 1381.1174  | 2.46532214 | 3.13E-08 | 5.73E-06 |
| SNORA81    | 278.00544  | -1.1230406 | 3.52E-08 | 6.36E-06 |
| RBMS3      | 1712.04174 | 2.90068568 | 4.16E-08 | 7.43E-06 |
| LOC1019273 | 23.3722114 | 3.65669149 | 4.57E-08 | 7.98E-06 |
| RPRM       | 17.2311231 | -4.2703577 | 4.52E-08 | 7.98E-06 |
| FAM180B    | 130.228134 | 4.14284587 | 4.73E-08 | 8.16E-06 |
| VPS26A     | 956.58959  | -1.097936  | 4.93E-08 | 8.42E-06 |
| H2AFX      | 227.186949 | -1.3129785 | 5.11E-08 | 8.54E-06 |
| RPS16      | 3869.45914 | -1.8144526 | 5.09E-08 | 8.54E-06 |
| SLC25A19   | 145.663531 | -1.6623851 | 5.40E-08 | 8.92E-06 |
| MTMR9LP    | 369.020284 | 2.90607615 | 6.02E-08 | 9.73E-06 |
| TPD52L2    | 2383.91508 | -0.8914758 | 5.99E-08 | 9.73E-06 |
| LRRC37A6P  | 139.826718 | 2.30105121 | 6.31E-08 | 1.01E-05 |
| BRSK1      | 144.145881 | 2.6541596  | 6.55E-08 | 1.02E-05 |

|             |            |            |          |          |
|-------------|------------|------------|----------|----------|
| CNTN4       | 1554.44583 | 3.91239369 | 6.75E-08 | 1.02E-05 |
| FAM127B     | 343.008818 | -1.1354841 | 6.55E-08 | 1.02E-05 |
| FBLN1       | 6312.00332 | 4.11687098 | 6.73E-08 | 1.02E-05 |
| LRP2        | 440.386223 | -4.2015537 | 6.74E-08 | 1.02E-05 |
| PCDHA10     | 147.119114 | 3.84910393 | 6.62E-08 | 1.02E-05 |
| CMAHP       | 469.81326  | 2.19084986 | 7.21E-08 | 1.08E-05 |
| SSPO        | 397.27109  | 2.02558996 | 8.27E-08 | 1.22E-05 |
| TRAF3IP2-AS | 213.573488 | 1.91233649 | 8.79E-08 | 1.29E-05 |
| MAB21L1     | 45.9403337 | 3.53826929 | 9.06E-08 | 1.31E-05 |
| MRPL12      | 203.470859 | -1.3296857 | 9.37E-08 | 1.32E-05 |
| PIGV        | 304.072252 | 1.21836931 | 9.29E-08 | 1.32E-05 |
| PTMS        | 2401.0335  | -1.6174574 | 9.37E-08 | 1.32E-05 |
| SNORA12     | 168.944295 | -1.4760489 | 1.01E-07 | 1.42E-05 |
| MESDC1      | 265.782867 | -1.7359374 | 1.03E-07 | 1.43E-05 |
| FMNL3       | 3179.53717 | 1.27751017 | 1.13E-07 | 1.55E-05 |
| NUMBL       | 918.914546 | -0.7433102 | 1.25E-07 | 1.70E-05 |
| MBOAT7      | 1007.5     | -1.2932154 | 1.30E-07 | 1.75E-05 |
| NCKAP5      | 272.86085  | 2.16296591 | 1.33E-07 | 1.78E-05 |
| FNDCA       | 43.4618769 | 2.53840513 | 1.35E-07 | 1.79E-05 |
| RAB7A       | 3068.07544 | -0.8888403 | 1.45E-07 | 1.91E-05 |
| SRBD1       | 712.238016 | 1.0032527  | 1.47E-07 | 1.91E-05 |
| MYO10       | 1703.4847  | 1.68710042 | 1.52E-07 | 1.97E-05 |
| ZNF812      | 254.578988 | 2.85954176 | 1.66E-07 | 2.13E-05 |
| LOC1001309  | 135.227433 | 2.95920106 | 1.77E-07 | 2.25E-05 |
| KRT17       | 290.938555 | -4.435953  | 2.37E-07 | 2.98E-05 |
| PITPNB      | 298.126276 | -1.5016675 | 2.40E-07 | 2.99E-05 |
| HSPB1       | 1784.53833 | -1.7723334 | 2.50E-07 | 3.09E-05 |
| SMO         | 974.607944 | 1.03834039 | 2.51E-07 | 3.09E-05 |
| NKD1        | 2902.84852 | 3.93439807 | 2.66E-07 | 3.25E-05 |
| GFRA1       | 3920.27359 | 4.19404843 | 2.83E-07 | 3.40E-05 |
| SYTL2       | 556.291234 | 2.29415727 | 2.83E-07 | 3.40E-05 |
| GHRLOS      | 87.2710881 | 2.56877614 | 2.94E-07 | 3.50E-05 |
| CLCF1       | 36.2708432 | -2.7978217 | 3.01E-07 | 3.55E-05 |
| LHCGR       | 434.184159 | 4.18805035 | 3.09E-07 | 3.58E-05 |
| PDCL3P4     | 77.2040671 | 1.43628226 | 3.10E-07 | 3.58E-05 |
| PRKY        | 24.7014498 | -4.060611  | 3.10E-07 | 3.58E-05 |
| GADD45GIP1  | 380.552251 | -1.2449738 | 3.28E-07 | 3.75E-05 |
| MARVELD1    | 1180.46317 | 1.16939191 | 3.44E-07 | 3.91E-05 |
| DLEU7-AS1   | 61.4656224 | 3.35170418 | 3.54E-07 | 3.97E-05 |
| ENTPD6      | 1974.61124 | -1.2376661 | 3.54E-07 | 3.97E-05 |
| WBP11       | 1139.43105 | -0.778251  | 3.56E-07 | 3.97E-05 |
| VILL        | 305.646666 | 1.11760015 | 3.59E-07 | 3.97E-05 |
| FKBP14      | 1042.10996 | 1.29303287 | 3.65E-07 | 4.01E-05 |
| RBPM5       | 186.527187 | -2.2831013 | 3.75E-07 | 4.09E-05 |
| SCAF4       | 813.497526 | -1.0171098 | 3.89E-07 | 4.18E-05 |
| USP32P2     | 330.541727 | 3.83585615 | 3.89E-07 | 4.18E-05 |
| OCRL        | 1303.94634 | -0.7261799 | 4.32E-07 | 4.61E-05 |
| ZNF580      | 440.001675 | -1.1463547 | 4.37E-07 | 4.63E-05 |
| VASH1       | 1337.75367 | 1.64124644 | 4.46E-07 | 4.70E-05 |
| RUNX1T1     | 292.210185 | 2.9897406  | 4.85E-07 | 5.07E-05 |

|           |            |            |          |            |
|-----------|------------|------------|----------|------------|
| CSRNP3    | 797.32837  | 3.17505407 | 4.92E-07 | 5.11E-05   |
| SLC7A1    | 367.567272 | -2.6774434 | 5.01E-07 | 5.16E-05   |
| AXL       | 2355.51827 | 1.6597282  | 6.02E-07 | 6.16E-05   |
| GRAMD3    | 3903.63772 | 0.82565949 | 6.26E-07 | 6.37E-05   |
| RPS17     | 212.834775 | -1.6053941 | 6.42E-07 | 6.49E-05   |
| RB1       | 2702.07519 | -0.8037136 | 6.63E-07 | 6.65E-05   |
| EMC6      | 134.178027 | -1.3238119 | 6.81E-07 | 6.71E-05   |
| MMP28     | 437.408951 | 2.95091138 | 6.76E-07 | 6.71E-05   |
| SEPHS2    | 472.554228 | -1.4458789 | 6.78E-07 | 6.71E-05   |
| ARG2      | 182.620903 | -3.0902715 | 7.00E-07 | 6.85E-05   |
| ANKRD22   | 290.495106 | 3.41402401 | 7.08E-07 | 6.88E-05   |
| ISG20     | 74.463395  | -1.8946225 | 7.35E-07 | 7.10E-05   |
| DGCR9     | 33.2272733 | 3.3524116  | 7.52E-07 | 7.22E-05   |
| RPL23AP32 | 241.485947 | 2.06140615 | 8.03E-07 | 7.67E-05   |
| NAF1      | 247.329384 | -1.1517838 | 8.65E-07 | 8.20E-05   |
| ZFP90     | 1253.66047 | 1.01022447 | 9.27E-07 | 8.74E-05   |
| BAI3      | 110.729087 | 3.19465535 | 9.73E-07 | 9.12E-05   |
| DNTTIP1   | 322.258853 | -1.1901271 | 1.08E-06 | 9.98E-05   |
| GPRC5A    | 519.279693 | -3.6804148 | 1.08E-06 | 9.98E-05   |
| UBE2E2    | 466.182216 | 1.59103385 | 1.09E-06 | 9.98E-05   |
| FTH1P3    | 49.8120427 | -2.4926254 | 1.12E-06 | 0.00010264 |
| HEG1      | 3843.57937 | 2.51314658 | 1.15E-06 | 0.00010374 |
| ITGB2-AS1 | 123.128026 | 3.02249708 | 1.15E-06 | 0.00010374 |
| LEPREL2   | 1183.3806  | 1.34249758 | 1.15E-06 | 0.00010374 |
| ANO3      | 48.4126152 | 3.73465885 | 1.18E-06 | 0.00010568 |
| PDZRN4    | 129.016036 | 3.94750504 | 1.20E-06 | 0.00010616 |
| AEBP1     | 10652.7395 | 3.01144856 | 1.28E-06 | 0.00011226 |
| PCDHA11   | 178.970131 | 2.91128653 | 1.28E-06 | 0.00011226 |
| LOXL3     | 448.296308 | 2.74614142 | 1.34E-06 | 0.00011687 |
| MGC45800  | 406.087808 | 3.95819377 | 1.39E-06 | 0.00011992 |
| POTEE     | 35.0908944 | -2.0705575 | 1.38E-06 | 0.00011992 |
| KRT10     | 256.178088 | -1.5191397 | 1.40E-06 | 0.00012018 |
| CBFA2T2   | 1645.37138 | -0.8953312 | 1.50E-06 | 0.00012795 |
| PLAC9     | 372.926639 | 3.42661826 | 1.57E-06 | 0.00013343 |
| MESTIT1   | 24.2645232 | 3.66161296 | 1.61E-06 | 0.00013604 |
| OPRL1     | 82.1149488 | 2.1013297  | 1.67E-06 | 0.0001393  |
| PARP3     | 306.994546 | 1.35842503 | 1.68E-06 | 0.0001393  |
| UBAP2     | 901.948535 | -1.1599973 | 1.68E-06 | 0.0001393  |
| ABHD12    | 742.993032 | -1.0558514 | 1.72E-06 | 0.00014216 |
| C16orf47  | 13.043493  | 3.76741355 | 1.78E-06 | 0.00014618 |
| PCDHA4    | 90.605321  | 3.08017522 | 1.79E-06 | 0.00014618 |
| CLEC17A   | 29.8089691 | 3.38159691 | 1.83E-06 | 0.0001477  |
| PCBP2     | 6997.12212 | -1.4061468 | 1.83E-06 | 0.0001477  |
| SNAI3     | 48.0057835 | 3.08889919 | 1.84E-06 | 0.0001477  |
| PA2G4     | 1625.9407  | -0.9009741 | 1.91E-06 | 0.00015249 |
| FUS       | 2061.1438  | -1.7157968 | 1.97E-06 | 0.00015669 |
| TMEM156   | 76.0179844 | 2.93169218 | 1.98E-06 | 0.00015702 |
| ADAMTSL2  | 298.408683 | 3.00081629 | 2.02E-06 | 0.00015869 |
| TRPC1     | 1133.63864 | 1.39569733 | 2.02E-06 | 0.00015869 |
| FOXC2     | 610.430689 | -1.5446804 | 2.08E-06 | 0.00016221 |

|            |            |            |          |            |
|------------|------------|------------|----------|------------|
| DACT3      | 124.667194 | 1.95795319 | 2.22E-06 | 0.00017248 |
| CIITA      | 1213.61787 | 2.24982852 | 2.39E-06 | 0.00018425 |
| BAZ2A      | 3045.86623 | -0.8526061 | 2.41E-06 | 0.00018492 |
| CASS4      | 220.568663 | 2.07362274 | 2.43E-06 | 0.00018581 |
| PHF19      | 639.152673 | 1.94523879 | 2.44E-06 | 0.00018581 |
| PLCL2      | 877.095265 | 2.268075   | 2.46E-06 | 0.00018646 |
| DTNA       | 234.588501 | 2.14701061 | 2.51E-06 | 0.00018872 |
| COL1A1     | 46547.2989 | 2.69341312 | 2.67E-06 | 0.00020007 |
| DPP10      | 9.47708917 | -3.334248  | 2.75E-06 | 0.00020475 |
| DKFZP434A0 | 15.1704078 | 3.73504972 | 2.80E-06 | 0.00020775 |
| NRG3       | 89.1857951 | -3.5836445 | 2.85E-06 | 0.0002105  |
| SLC2A9     | 160.397648 | 2.20801179 | 2.86E-06 | 0.0002105  |
| BOK        | 650.332749 | 2.78141998 | 2.97E-06 | 0.00021642 |
| TDRP       | 1046.95629 | -2.4301446 | 2.96E-06 | 0.00021642 |
| C3orf18    | 272.584217 | 1.58300809 | 3.05E-06 | 0.00022116 |
| ATIC       | 665.29126  | -1.7657756 | 3.07E-06 | 0.00022146 |
| FAM212A    | 74.8966926 | 2.65313236 | 3.20E-06 | 0.00022959 |
| OSER1      | 660.441541 | -0.7695652 | 3.31E-06 | 0.00023633 |
| SAMD5      | 1329.41825 | 3.62360449 | 3.41E-06 | 0.00024278 |
| RBM3       | 3581.23588 | -0.9941426 | 3.47E-06 | 0.00024589 |
| EDNRA      | 4030.8456  | 2.68170083 | 3.60E-06 | 0.00025283 |
| PSMF1      | 1606.69109 | -0.8170316 | 3.60E-06 | 0.00025283 |
| EBF3       | 660.617463 | 3.10302186 | 3.69E-06 | 0.00025777 |
| PRRT2      | 370.648442 | 2.63465535 | 3.87E-06 | 0.00026934 |
| CACNA1G    | 151.788727 | 3.40596919 | 3.93E-06 | 0.00027071 |
| FLJ46906   | 25.5518943 | 2.52309416 | 3.91E-06 | 0.00027071 |
| GIMAP1     | 208.690848 | 1.85875753 | 4.00E-06 | 0.00027404 |
| NLRP3      | 603.259282 | 2.16877412 | 4.04E-06 | 0.00027571 |
| ATP5D      | 523.212089 | -0.8587376 | 4.10E-06 | 0.00027802 |
| FAM129A    | 3647.17931 | -2.2618469 | 4.11E-06 | 0.00027802 |
| IGF1       | 1668.89729 | 3.17981081 | 4.45E-06 | 0.00029977 |
| ATOH8      | 523.714726 | 2.12681953 | 4.64E-06 | 0.00031123 |
| BEX2       | 201.750508 | -2.4262676 | 4.71E-06 | 0.00031431 |
| ABCA2      | 1147.99246 | 1.78478817 | 4.85E-06 | 0.00032284 |
| POTEJ      | 27.1459188 | -2.0022491 | 4.92E-06 | 0.0003258  |
| NAGA       | 1000.7397  | 0.73259291 | 5.00E-06 | 0.00032981 |
| SLC26A6    | 636.221343 | 1.77040758 | 5.11E-06 | 0.00033568 |
| LOC728323  | 66.4908291 | -1.5187721 | 5.17E-06 | 0.00033797 |
| C5         | 517.372327 | 1.88939516 | 5.27E-06 | 0.00034302 |
| NUBPL      | 220.398067 | 1.34761257 | 5.48E-06 | 0.00035512 |
| DAZAP2     | 3409.97113 | -0.861041  | 5.98E-06 | 0.00038594 |
| CDC42EP2   | 441.256379 | -1.481863  | 6.22E-06 | 0.00039222 |
| DFNB59     | 54.2502596 | 2.11114031 | 6.22E-06 | 0.00039222 |
| FZD10-AS1  | 61.3606829 | 3.24557071 | 6.28E-06 | 0.00039222 |
| KCNK10     | 40.0933572 | 3.18609796 | 6.12E-06 | 0.00039222 |
| PID1       | 740.484426 | 2.95686207 | 6.23E-06 | 0.00039222 |
| PRPF6      | 1998.68703 | -0.6993764 | 6.24E-06 | 0.00039222 |
| SGCA       | 27.2670295 | 3.37457889 | 6.19E-06 | 0.00039222 |
| TSTD3      | 115.838688 | 1.29185602 | 6.26E-06 | 0.00039222 |
| PNPLA2     | 747.766906 | -1.2443794 | 6.43E-06 | 0.00039969 |

|            |            |            |          |            |
|------------|------------|------------|----------|------------|
| MRM1       | 87.9971763 | 1.28166438 | 6.53E-06 | 0.0004046  |
| SRPX       | 356.122567 | 3.58751899 | 6.62E-06 | 0.00040819 |
| CD24       | 36.6261091 | -3.391969  | 6.72E-06 | 0.00041294 |
| ATP6VOC    | 1099.91462 | -1.6060089 | 6.86E-06 | 0.00041986 |
| ACY3       | 18.0914456 | 3.63999651 | 7.00E-06 | 0.00042339 |
| PCBP4      | 623.170356 | 1.55806497 | 6.95E-06 | 0.00042339 |
| TMSB4Y     | 12.9252714 | -3.8783832 | 6.99E-06 | 0.00042339 |
| ANXA2P1    | 19.3878257 | -2.252151  | 7.06E-06 | 0.00042537 |
| NCRNA0018  | 11.8580033 | -3.8763932 | 7.52E-06 | 0.00045149 |
| CKLF       | 103.666045 | 1.59921196 | 7.80E-06 | 0.00045904 |
| GPR114     | 75.7223284 | 3.06575593 | 7.79E-06 | 0.00045904 |
| IREB2      | 2418.9366  | -0.8966751 | 7.78E-06 | 0.00045904 |
| RPL13P5    | 31.5346103 | -1.5421908 | 7.73E-06 | 0.00045904 |
| SNORA5C    | 25.3654668 | 2.49690245 | 7.79E-06 | 0.00045904 |
| LOC1001297 | 22.1781494 | 2.48031046 | 7.85E-06 | 0.0004601  |
| BRICD5     | 58.5591463 | 1.49361741 | 7.91E-06 | 0.00046187 |
| C9orf139   | 34.6148275 | 3.20450578 | 8.00E-06 | 0.00046571 |
| COL3A1     | 45875.1731 | 2.38635115 | 8.20E-06 | 0.00047536 |
| GPSM1      | 564.736817 | 1.35297529 | 8.24E-06 | 0.00047567 |
| PFN1       | 3932.01119 | -0.9494174 | 8.82E-06 | 0.00050751 |
| FAM117B    | 373.477159 | 0.99899637 | 8.92E-06 | 0.00050957 |
| TRPV3      | 61.5652676 | 2.49661446 | 8.89E-06 | 0.00050957 |
| SMOC2      | 2762.60469 | 2.49215556 | 9.06E-06 | 0.00051551 |
| MAP3K3     | 1925.48476 | 0.83698734 | 9.50E-06 | 0.00053851 |
| LOC646903  | 62.4677993 | 2.05883974 | 9.62E-06 | 0.00054274 |
| PCSK5      | 520.277984 | 2.0240137  | 9.64E-06 | 0.00054274 |
| DLGAP2     | 160.28278  | 3.44212149 | 9.74E-06 | 0.00054634 |
| SYNJ1      | 1224.35023 | -1.003242  | 9.83E-06 | 0.00054919 |
| IGSF21     | 174.006579 | 2.18615751 | 9.99E-06 | 0.00055626 |
| CDH5       | 2660.78331 | 1.29149036 | 1.01E-05 | 0.00056027 |
| GAPT       | 167.043429 | 2.11081383 | 1.01E-05 | 0.00056027 |
| ANKRD30BL  | 18.3395207 | 3.58879945 | 1.03E-05 | 0.00056545 |
| MEX3D      | 239.941519 | -1.2430499 | 1.07E-05 | 0.00058814 |
| NT5M       | 42.3630716 | 1.91202362 | 1.10E-05 | 0.00060111 |
| LOC339874  | 30.2693535 | 2.4229137  | 1.14E-05 | 0.00062061 |
| GSN-AS1    | 10.6554725 | 3.51332889 | 1.16E-05 | 0.00062982 |
| RCN3       | 741.641767 | 2.42407128 | 1.16E-05 | 0.00062982 |
| KIAA0922   | 819.244876 | -2.1760744 | 1.19E-05 | 0.00064083 |
| PCOLCE     | 3790.80254 | 2.2688758  | 1.20E-05 | 0.00064688 |
| USP32P1    | 218.199474 | -3.2031267 | 1.21E-05 | 0.00065024 |
| ADAMTS5    | 725.028482 | -3.5477117 | 1.23E-05 | 0.00065496 |
| DLL1       | 213.110559 | 2.67004839 | 1.23E-05 | 0.00065496 |
| BCL3       | 194.56758  | -2.999605  | 1.25E-05 | 0.0006613  |
| SFRP4      | 8547.78065 | 3.28421819 | 1.25E-05 | 0.0006613  |
| CSTB       | 1368.1141  | -2.0482227 | 1.26E-05 | 0.00066238 |
| SEMA4B     | 256.479107 | -2.3581979 | 1.28E-05 | 0.00067238 |
| MAP2K2     | 1083.02621 | -0.5917673 | 1.29E-05 | 0.0006759  |
| COL8A2     | 3103.57989 | 2.86190822 | 1.31E-05 | 0.00067988 |
| TMEM42     | 194.662854 | 1.36274972 | 1.32E-05 | 0.00068285 |
| IL27RA     | 65.2067573 | 2.12405951 | 1.35E-05 | 0.00069832 |

|           |            |            |          |            |
|-----------|------------|------------|----------|------------|
| DUSP14    | 274.901296 | -1.3437833 | 1.36E-05 | 0.00069858 |
| TBC1D4    | 741.704257 | 1.65740987 | 1.36E-05 | 0.00069858 |
| G6PD      | 924.387591 | -1.9814354 | 1.37E-05 | 0.00069953 |
| SORL1     | 7078.16534 | 2.24696935 | 1.39E-05 | 0.00071188 |
| EMP3      | 751.171591 | -1.3150994 | 1.45E-05 | 0.00073558 |
| SCNN1D    | 165.460489 | 2.05435778 | 1.45E-05 | 0.00073558 |
| MLF2      | 1298.17911 | -0.7380505 | 1.48E-05 | 0.00075042 |
| ADRM1     | 830.545069 | -0.873068  | 1.53E-05 | 0.00077166 |
| SPG7      | 1665.33845 | 0.72842755 | 1.55E-05 | 0.00077594 |
| AACS      | 520.19432  | -1.0013271 | 1.58E-05 | 0.0007878  |
| B3GNT9    | 931.241058 | 1.12507271 | 1.58E-05 | 0.0007878  |
| LSM14A    | 2476.81327 | -0.6701903 | 1.60E-05 | 0.00079669 |
| PSMB10    | 407.267588 | 1.01300971 | 1.63E-05 | 0.00080551 |
| CLEC10A   | 83.4503085 | 3.16148671 | 1.64E-05 | 0.00080874 |
| KIAA1614  | 252.874541 | 1.85226067 | 1.66E-05 | 0.00081977 |
| YPEL2     | 935.706854 | 1.712792   | 1.70E-05 | 0.00083284 |
| NUDT15    | 253.213944 | -1.264223  | 1.71E-05 | 0.00083546 |
| INHBB     | 243.336524 | -2.953258  | 1.73E-05 | 0.00084358 |
| C18orf32  | 55.0688252 | -1.335495  | 1.76E-05 | 0.00085804 |
| ADCY10P1  | 178.341844 | 2.43246047 | 1.79E-05 | 0.00086989 |
| KCNA6     | 238.109519 | 3.41943777 | 1.81E-05 | 0.00087392 |
| EXTL1     | 33.6215735 | 3.34612053 | 1.82E-05 | 0.00087708 |
| PAK4      | 737.400849 | -1.0965682 | 1.83E-05 | 0.00087708 |
| MATN2     | 1894.35367 | 3.02135346 | 1.86E-05 | 0.00088811 |
| P2RY13    | 655.801241 | 2.15706234 | 1.88E-05 | 0.00089876 |
| SPATA18   | 194.331189 | 3.33239648 | 1.95E-05 | 0.00092904 |
| AQP3      | 23.2898567 | -2.7713416 | 2.01E-05 | 0.00093142 |
| BTN3A1    | 674.446782 | 1.32297456 | 2.00E-05 | 0.00093142 |
| CDC42EP3  | 1375.13036 | 1.85129749 | 1.99E-05 | 0.00093142 |
| CMTR2     | 777.115538 | 0.60419959 | 1.99E-05 | 0.00093142 |
| NIPSNAP3B | 36.7386579 | 1.91701028 | 1.98E-05 | 0.00093142 |
| PPL       | 496.576815 | -3.2722458 | 1.99E-05 | 0.00093142 |
| RPL21     | 13.7266502 | 2.99050945 | 2.01E-05 | 0.00093142 |
| SPACA6P   | 279.309516 | -1.0110515 | 2.01E-05 | 0.00093142 |
| TUBA1C    | 1068.99706 | -1.5457826 | 1.98E-05 | 0.00093142 |
| SLC12A9   | 627.61514  | 1.08891131 | 2.04E-05 | 0.0009413  |
| ALDH1A2   | 789.609623 | -3.1726783 | 2.06E-05 | 0.00094548 |
| TCEB1     | 413.386389 | -1.1361297 | 2.06E-05 | 0.00094548 |
| PTP4A1    | 3031.03845 | -2.1514307 | 2.08E-05 | 0.00095203 |
| NAGLU     | 786.025844 | 1.45220165 | 2.20E-05 | 0.00100239 |
| TIA1      | 1941.02092 | 0.82168321 | 2.23E-05 | 0.00101489 |
| ATG3      | 737.363781 | -0.6287369 | 2.27E-05 | 0.00102919 |
| NUDT3     | 223.102196 | -1.2221234 | 2.28E-05 | 0.00102998 |
| ANXA2P3   | 16.5254199 | -2.3804876 | 2.33E-05 | 0.00104665 |
| STARD8    | 824.909303 | 1.42353066 | 2.33E-05 | 0.00104665 |
| SOCS2     | 354.459172 | 2.42003089 | 2.35E-05 | 0.00105056 |
| POTEF     | 9.42068188 | -2.2710281 | 2.36E-05 | 0.00105308 |
| TRAF1     | 537.449986 | 1.85331871 | 2.39E-05 | 0.00106295 |
| MAPRE1    | 2519.71499 | -0.8688395 | 2.44E-05 | 0.00108187 |
| RBP1      | 657.036329 | -2.8077557 | 2.57E-05 | 0.00113718 |

|           |            |            |          |            |
|-----------|------------|------------|----------|------------|
| C11orf45  | 58.7965193 | 2.33168426 | 2.58E-05 | 0.00113869 |
| GPM6B     | 316.002062 | -3.3951571 | 2.59E-05 | 0.00114055 |
| PCDHA9    | 97.6420268 | 2.97508426 | 2.64E-05 | 0.00115605 |
| YTHDF1    | 1057.07655 | -0.7739692 | 2.64E-05 | 0.00115605 |
| DDRKG1    | 782.697803 | -0.8577143 | 2.69E-05 | 0.0011749  |
| COL9A2    | 159.561362 | 2.68009768 | 2.74E-05 | 0.00119148 |
| KIF26B    | 79.1806577 | 2.41100603 | 2.75E-05 | 0.00119148 |
| FTH1      | 18270.7513 | -2.1466717 | 2.82E-05 | 0.00121918 |
| NPAS2     | 192.840746 | -1.601458  | 2.83E-05 | 0.00122073 |
| SRP14     | 2906.00717 | -1.1516651 | 2.84E-05 | 0.00122073 |
| CRMP1     | 169.741724 | 1.98897067 | 2.86E-05 | 0.00122737 |
| USP2      | 223.568262 | -3.2371521 | 2.91E-05 | 0.00124458 |
| PRDX6     | 3120.95627 | -1.0326576 | 2.99E-05 | 0.0012763  |
| KLHL24    | 2248.47398 | 0.57706976 | 3.02E-05 | 0.00128549 |
| TEFM      | 180.880394 | 0.73942808 | 3.03E-05 | 0.00128549 |
| CAPZB     | 3022.93529 | -1.2129458 | 3.13E-05 | 0.00132328 |
| CLEC12A   | 39.4226214 | 2.96975808 | 3.19E-05 | 0.00134001 |
| MMP2      | 4992.24454 | 2.48082863 | 3.18E-05 | 0.00134001 |
| UBE2K     | 1840.93064 | -0.6695776 | 3.19E-05 | 0.00134001 |
| COL8A1    | 11001.4523 | 3.23469543 | 3.21E-05 | 0.00134064 |
| GLYCTK    | 373.828557 | 0.78701158 | 3.21E-05 | 0.00134064 |
| GAP43     | 242.498126 | 2.88518245 | 3.23E-05 | 0.00134351 |
| LOC151475 | 26.1165518 | 3.20587403 | 3.39E-05 | 0.00140866 |
| C7orf31   | 121.392756 | 1.59623974 | 3.41E-05 | 0.00140979 |
| CNNM1     | 61.302933  | -3.2864125 | 3.41E-05 | 0.00140979 |
| MRAP      | 71.0824176 | -3.2914385 | 3.49E-05 | 0.00143548 |
| SASH1     | 1673.33707 | 1.89868226 | 3.50E-05 | 0.00143778 |
| MFAP5     | 4002.13688 | 3.05250168 | 3.52E-05 | 0.00144037 |
| FANCD2    | 590.55024  | 1.73347003 | 3.54E-05 | 0.00144184 |
| LLPH      | 329.113395 | -1.0513992 | 3.53E-05 | 0.00144184 |
| CYS1      | 490.43288  | 2.89526334 | 3.55E-05 | 0.0014436  |
| TLR10     | 52.830234  | 2.40890177 | 3.58E-05 | 0.00145313 |
| BAP1      | 1117.4719  | 0.64169916 | 3.61E-05 | 0.00145819 |
| ENTPD1    | 1506.12822 | 1.59817745 | 3.62E-05 | 0.00146005 |
| PSRC1     | 97.3219219 | 2.26547036 | 3.73E-05 | 0.00149875 |
| TRPC3     | 908.130875 | -2.6420277 | 3.74E-05 | 0.00150146 |
| STARD5    | 127.798    | 2.4475823  | 3.79E-05 | 0.00151804 |
| CBX4      | 491.212535 | -1.777197  | 3.81E-05 | 0.00152168 |
| CCNYL1    | 521.550797 | -0.8440535 | 3.86E-05 | 0.00153459 |
| TBC1D15   | 1187.68109 | -0.687192  | 3.91E-05 | 0.00155132 |
| MYOZ1     | 107.23121  | 3.10473391 | 3.94E-05 | 0.00156029 |
| KAZALD1   | 69.7993148 | 3.03092694 | 4.06E-05 | 0.00160284 |
| UBE2M     | 649.500202 | -1.4497353 | 4.11E-05 | 0.00161721 |
| LIMCH1    | 2373.99614 | 1.48879031 | 4.12E-05 | 0.00161729 |
| DEFB1     | 10.9585867 | -3.397588  | 4.15E-05 | 0.00162615 |
| NRXN2     | 270.500819 | 3.0509122  | 4.27E-05 | 0.00166768 |
| WNK2      | 143.449626 | -2.7999288 | 4.28E-05 | 0.00166768 |
| DAPP1     | 89.6329615 | 2.12811774 | 4.32E-05 | 0.00167384 |
| MAGI2     | 846.668953 | 0.99385094 | 4.31E-05 | 0.00167384 |
| NS3BP     | 136.956891 | 1.2683581  | 4.34E-05 | 0.00167384 |



|            |            |            |          |            |
|------------|------------|------------|----------|------------|
| ST8SIA1    | 437.954012 | 3.40993684 | 4.34E-05 | 0.00167384 |
| TNNI3      | 13.0373529 | -3.3938086 | 4.35E-05 | 0.00167384 |
| MTRNR2L2   | 4139.26041 | -1.7904975 | 4.39E-05 | 0.00168702 |
| FAM98B     | 546.426768 | -1.1986605 | 4.44E-05 | 0.0017016  |
| DMD        | 4379.67576 | 2.28392498 | 4.48E-05 | 0.0017111  |
| ADAM19     | 666.126675 | -2.1890629 | 4.69E-05 | 0.00178265 |
| ASS1       | 3183.29883 | -1.623182  | 4.68E-05 | 0.00178265 |
| ANXA2P2    | 88.6323372 | -1.8057475 | 4.86E-05 | 0.0018428  |
| USP31      | 1200.2471  | -1.6053848 | 4.90E-05 | 0.00185487 |
| GZF1       | 525.226113 | -0.9064211 | 5.09E-05 | 0.00192234 |
| SERTM1     | 447.74258  | 3.38389923 | 5.12E-05 | 0.00192779 |
| MIR3648    | 34.7191799 | -3.2346713 | 5.25E-05 | 0.00197302 |
| RSPO3      | 948.435384 | 3.20343153 | 5.30E-05 | 0.00197854 |
| SLC24A3    | 1267.40416 | -2.0781714 | 5.30E-05 | 0.00197854 |
| SNORA74B   | 537.446259 | -1.6272242 | 5.31E-05 | 0.00197854 |
| FZD4       | 4203.62883 | 1.62500253 | 5.33E-05 | 0.00198413 |
| NANP       | 280.173546 | -0.8203749 | 5.35E-05 | 0.00198525 |
| EDA        | 633.090013 | -2.1647018 | 5.39E-05 | 0.00199248 |
| ZCCHC3     | 399.151733 | -1.134191  | 5.40E-05 | 0.00199248 |
| LINC01268  | 62.4960403 | 2.52579039 | 5.67E-05 | 0.00208867 |
| RPL41      | 4645.37108 | -0.9749929 | 5.81E-05 | 0.00213602 |
| DUSP5      | 769.910331 | -2.8934907 | 5.83E-05 | 0.00213936 |
| DLG2       | 357.030032 | 2.4663227  | 5.96E-05 | 0.00217027 |
| FILIP1L    | 612.79453  | 1.53289318 | 5.96E-05 | 0.00217027 |
| TSTA3      | 325.66258  | -1.3037106 | 5.95E-05 | 0.00217027 |
| SDHC       | 899.975198 | -0.7690109 | 6.02E-05 | 0.00218474 |
| FGF7       | 758.727417 | 3.11939453 | 6.06E-05 | 0.00219716 |
| ATF5       | 212.700424 | -1.4660871 | 6.14E-05 | 0.00221792 |
| PPFIBP2    | 695.01129  | 1.96513761 | 6.15E-05 | 0.00221792 |
| SNORD89    | 9.14941746 | 3.26535094 | 6.21E-05 | 0.0022358  |
| F2RL2      | 132.372557 | 3.14181284 | 6.31E-05 | 0.00224867 |
| OSGEPL1-AS | 20.3555783 | 2.32404662 | 6.27E-05 | 0.00224867 |
| PHF14      | 1607.65242 | 0.65722013 | 6.30E-05 | 0.00224867 |
| RFTN2      | 481.74834  | 2.54617919 | 6.31E-05 | 0.00224867 |
| DBNDD2     | 125.097459 | -1.5183146 | 6.39E-05 | 0.00225275 |
| FAM106A    | 66.6097201 | 3.36092123 | 6.36E-05 | 0.00225275 |
| UBQLN2     | 1145.20624 | -0.7046826 | 6.34E-05 | 0.00225275 |
| WDR59      | 694.542802 | 0.75885425 | 6.37E-05 | 0.00225275 |
| ZNF579     | 119.358316 | -1.1007855 | 6.39E-05 | 0.00225275 |
| DIEXF      | 634.580466 | -0.5917679 | 6.59E-05 | 0.0023159  |
| KBTBD12    | 31.1976024 | 3.05534822 | 6.68E-05 | 0.00234456 |
| CAPNS2     | 16.99189   | 2.98308092 | 6.83E-05 | 0.00238468 |
| RAB27B     | 794.268045 | -3.3444782 | 6.83E-05 | 0.00238468 |
| SNAI2      | 1627.09641 | 2.31807195 | 6.96E-05 | 0.00242301 |
| SIN3A      | 1979.37122 | -0.8560902 | 7.16E-05 | 0.00248694 |
| S100A10    | 4118.47639 | -1.2800556 | 7.21E-05 | 0.00249986 |
| PAX6       | 140.908387 | -3.0438182 | 7.24E-05 | 0.00250627 |
| LAMB2      | 16568.7352 | 1.57367416 | 7.36E-05 | 0.00253505 |
| M6PR       | 1605.82037 | -0.8081402 | 7.36E-05 | 0.00253505 |
| FAM150B    | 50.4751388 | -3.3503156 | 7.38E-05 | 0.00253561 |

|           |            |            |            |            |
|-----------|------------|------------|------------|------------|
| ZNF574    | 327.811762 | -0.7010682 | 7.57E-05   | 0.00259489 |
| ZNF69     | 171.856664 | 1.77717435 | 7.58E-05   | 0.00259489 |
| FAR2      | 250.399294 | 1.89328825 | 7.71E-05   | 0.00263201 |
| PBDC1     | 235.763314 | -1.1333222 | 7.73E-05   | 0.00263201 |
| OLFM2     | 336.500716 | 2.18306522 | 7.75E-05   | 0.00263278 |
| EBF1      | 1593.5523  | 2.76741106 | 7.76E-05   | 0.00263293 |
| OXNAD1    | 256.651065 | 1.15949784 | 7.79E-05   | 0.00263457 |
| CCDC8     | 726.428547 | 1.25493425 | 7.82E-05   | 0.00263979 |
| IGSF9B    | 258.839489 | -1.6570858 | 7.85E-05   | 0.00263979 |
| ITGA8     | 740.10579  | 3.10215773 | 7.85E-05   | 0.00263979 |
| CLN6      | 414.055234 | -0.7237682 | 7.92E-05   | 0.00265546 |
| NHSL1     | 712.137943 | 1.5983034  | 7.94E-05   | 0.0026566  |
| SHC4      | 739.491724 | 3.03563446 | 8.03E-05   | 0.00268132 |
| SPON1     | 198.863673 | 2.87253632 | 8.26E-05   | 0.00275345 |
| ANGPT1    | 266.416772 | 3.07801251 | 8.36E-05   | 0.00276139 |
| GHRL      | 31.0738945 | 2.76585734 | 8.34E-05   | 0.00276139 |
| PCDHA2    | 74.0204063 | 2.57374564 | 8.35E-05   | 0.00276139 |
| ZNF865    | 250.043489 | -1.2378553 | 8.34E-05   | 0.00276139 |
| FURIN     | 2008.87231 | -1.1196707 | 8.42E-05   | 0.00277616 |
| PDPR      | 2046.37728 | 1.09939628 | 8.47E-05   | 0.00278592 |
| ELMO1     | 960.182521 | 1.52953308 | 8.57E-05   | 0.00281017 |
| RASSF3    | 838.787003 | -1.4899065 | 8.58E-05   | 0.00281017 |
| RGS10     | 338.520262 | 1.30762215 | 8.66E-05   | 0.00283048 |
| NBN       | 4847.62829 | 2.31698943 | 8.84E-05   | 0.00288359 |
| CSNK1D    | 2134.88768 | -1.1492728 | 8.99E-05   | 0.00292458 |
| SH3GL1P2  | 40.4998232 | 3.2356626  | 9.01E-05   | 0.00292644 |
| HIST2H2BE | 778.802348 | -1.2223305 | 9.13E-05   | 0.00294786 |
| PALLD     | 1010.69946 | 1.90126087 | 9.10E-05   | 0.00294786 |
| VIPR1     | 122.203871 | 2.11114819 | 9.13E-05   | 0.00294786 |
| ITPR1     | 1340.12641 | 1.84771374 | 9.22E-05   | 0.00297001 |
| CTSA      | 2238.74009 | -1.0317164 | 9.29E-05   | 0.00298472 |
| HMCN1     | 1724.38962 | 2.99386011 | 9.31E-05   | 0.00298472 |
| CARD9     | 131.056439 | 2.13827693 | 9.52E-05   | 0.00304855 |
| IFT172    | 979.135422 | 1.02054312 | 9.62E-05   | 0.00307164 |
| GRIA3     | 246.633827 | 3.12196612 | 9.67E-05   | 0.00307181 |
| STAT6     | 4315.64981 | -0.9160598 | 9.68E-05   | 0.00307181 |
| TXN2      | 550.627764 | -1.2578014 | 9.64E-05   | 0.00307181 |
| RPL8      | 9046.97006 | -1.2647836 | 9.71E-05   | 0.00307616 |
| TBCE      | 322.839801 | -0.843671  | 9.73E-05   | 0.00307635 |
| TRIM65    | 417.251376 | 1.14782918 | 9.76E-05   | 0.00308047 |
| SUSD3     | 97.6412492 | 2.47177495 | 9.82E-05   | 0.00309023 |
| CALD1     | 9633.32965 | 0.97270148 | 9.87E-05   | 0.00310043 |
| RPL17     | 2019.42801 | -0.9426219 | 9.90E-05   | 0.00310419 |
| PCBP1     | 2046.28105 | -1.1999325 | 0.00010019 | 0.00313477 |
| POLR2L    | 1037.31889 | -1.005457  | 0.00010105 | 0.00315531 |
| THAP11    | 426.758093 | 1.04467579 | 0.0001017  | 0.00315718 |
| ULK1      | 983.130223 | -0.9594494 | 0.00010173 | 0.00315718 |
| WNT5A     | 903.497256 | 2.4963588  | 0.00010159 | 0.00315718 |
| TRMT6     | 266.778985 | -1.1111457 | 0.0001022  | 0.00316537 |
| SCN11A    | 34.2413305 | 2.37601962 | 0.00010397 | 0.003214   |

|            |            |            |            |            |
|------------|------------|------------|------------|------------|
| FMR1       | 1526.1203  | -0.7146428 | 0.00010685 | 0.00328296 |
| SNORA76C   | 21.6572218 | 2.59623148 | 0.00010664 | 0.00328296 |
| TMEM119    | 590.075282 | 2.62213666 | 0.00010647 | 0.00328296 |
| RUNX2      | 611.338329 | 2.54927378 | 0.00010855 | 0.00332877 |
| C21orf91   | 588.921358 | -1.2390598 | 0.00010916 | 0.00334057 |
| CSNK2A1    | 1904.49164 | -0.9438932 | 0.00011034 | 0.00337012 |
| ATP8B4     | 759.589314 | 1.89229228 | 0.00011075 | 0.00337435 |
| TMEM220    | 64.7612617 | 1.61083228 | 0.00011092 | 0.00337435 |
| SGCE       | 180.052518 | 2.4138667  | 0.00011127 | 0.00337843 |
| BBS2       | 1417.22308 | 0.95698129 | 0.00011164 | 0.00338283 |
| ACSM5      | 96.8522889 | 1.62923034 | 0.00011192 | 0.00338458 |
| FZD9       | 11.9616586 | 2.99122388 | 0.00011218 | 0.00338578 |
| TNS3       | 5708.79724 | 2.28967029 | 0.00011324 | 0.00341132 |
| ERO1L      | 1364.69445 | -1.3682058 | 0.00011378 | 0.003418   |
| HIRA       | 706.395745 | -0.9305524 | 0.00011391 | 0.003418   |
| FKBP1A     | 1647.33284 | -1.166668  | 0.00011486 | 0.0034399  |
| FAM177B    | 22.9565675 | 2.18234364 | 0.0001173  | 0.00350471 |
| LOC401052  | 14.6308791 | 2.47658232 | 0.00011749 | 0.00350471 |
| CACNA1C    | 1029.5167  | 1.50197108 | 0.00011796 | 0.00351201 |
| GYS1       | 1236.97573 | -1.0228968 | 0.0001182  | 0.00351237 |
| ARRDC4     | 1254.20765 | -2.606078  | 0.00011981 | 0.00355325 |
| ARAF       | 1096.38219 | -0.6147988 | 0.00012265 | 0.00360965 |
| ARL4C      | 432.738622 | -2.5974308 | 0.0001224  | 0.00360965 |
| EPHA4      | 909.997937 | 2.24844686 | 0.00012257 | 0.00360965 |
| MASP1      | 125.217544 | 2.98178082 | 0.00012261 | 0.00360965 |
| LIMS1      | 1466.99041 | -0.6670824 | 0.00012337 | 0.00362399 |
| ATP6V0E2-A | 84.0713461 | 1.29672704 | 0.00012404 | 0.00363675 |
| MROH8      | 115.927199 | 1.14586564 | 0.00012669 | 0.00370016 |
| TMEM115    | 867.579742 | 0.72141179 | 0.00012664 | 0.00370016 |
| RSRC2      | 1330.23928 | -0.5824476 | 0.00012712 | 0.0037059  |
| PPTC7      | 408.387839 | -1.0221237 | 0.00013059 | 0.0037996  |
| MAN1B1-AS  | 27.2382383 | 1.79384685 | 0.00013236 | 0.00384395 |
| DDAH1      | 1396.00879 | 1.48702171 | 0.00013431 | 0.00388583 |
| SEC11C     | 573.009719 | -1.6435295 | 0.00013427 | 0.00388583 |
| CFL2       | 1222.73687 | -0.8106719 | 0.00013531 | 0.00390027 |
| IPCEF1     | 196.584247 | 2.01322287 | 0.00013528 | 0.00390027 |
| FSIP2      | 356.077078 | 3.09760331 | 0.00013639 | 0.0039239  |
| ACKR3      | 1345.37309 | -2.3466173 | 0.00013812 | 0.00396612 |
| MCOLN1     | 346.372455 | -1.0336194 | 0.0001398  | 0.00400694 |
| MYH10      | 4064.02102 | 1.78242206 | 0.00014093 | 0.00403174 |
| PCBP1-AS1  | 146.694438 | 1.67278117 | 0.00014188 | 0.00405157 |
| AOAH-IT1   | 9.67468382 | 3.14085245 | 0.00014414 | 0.00410834 |
| FAM131A    | 411.365615 | 1.62348188 | 0.00014468 | 0.00411628 |
| SNORA74A   | 149.935201 | -1.3867119 | 0.00014522 | 0.0041238  |
| PALM2      | 63.1272044 | 2.76052578 | 0.0001456  | 0.00412699 |
| DOK5       | 333.78819  | 2.75872387 | 0.00014806 | 0.00418896 |
| EIF1       | 4640.81777 | -1.1773505 | 0.00014966 | 0.00422656 |
| UBA7       | 1315.67449 | 1.46550037 | 0.00015139 | 0.00426758 |
| IL17RC     | 469.207089 | 1.06048484 | 0.00015205 | 0.00427841 |
| PRKAR2A-AS | 20.1933391 | 2.14972069 | 0.00015282 | 0.00429206 |

|            |            |            |            |            |
|------------|------------|------------|------------|------------|
| DLGAP1-AS1 | 150.996104 | -1.0612229 | 0.00015453 | 0.0043322  |
| TLR5       | 278.398309 | 1.63664517 | 0.00015493 | 0.00433542 |
| GSK3A      | 647.343512 | -0.9753142 | 0.00015587 | 0.00435378 |
| ERH        | 874.33499  | -0.9769701 | 0.00015741 | 0.00438886 |
| NAALAD2    | 108.544845 | 2.87686735 | 0.00015779 | 0.00439123 |
| PCDHA7     | 45.9968662 | 2.78946951 | 0.00015806 | 0.00439123 |
| DCTPP1     | 194.707599 | -0.675629  | 0.00015883 | 0.00439309 |
| GAR1       | 98.4514306 | -1.0869057 | 0.00015899 | 0.00439309 |
| RASAL2-AS1 | 66.9377764 | 1.63185875 | 0.00015892 | 0.00439309 |
| QDPR       | 235.751868 | -1.1157772 | 0.00016461 | 0.00454019 |
| RNF207     | 292.082755 | 2.05575308 | 0.00016663 | 0.00458768 |
| SESN1      | 3322.38454 | 1.33310648 | 0.00016723 | 0.00459611 |
| ENO2       | 1061.55565 | -2.353907  | 0.0001677  | 0.00460057 |
| PLD2       | 1008.35744 | 1.08372472 | 0.00016944 | 0.00464002 |
| LOC1019280 | 8.67536188 | 2.85355949 | 0.00017022 | 0.00465306 |
| CWC15      | 724.153853 | -0.5933635 | 0.00017102 | 0.00465839 |
| ENGASE     | 626.486568 | 1.0020621  | 0.00017094 | 0.00465839 |
| LINC00312  | 54.5382203 | 2.74119969 | 0.00017435 | 0.00474086 |
| SMYD5      | 311.563773 | 0.75687797 | 0.00017541 | 0.00475291 |
| TBC1D5     | 2406.00603 | 1.01108105 | 0.00017515 | 0.00475291 |
| LOC284950  | 19.3966837 | 2.22239665 | 0.00017598 | 0.00475463 |
| MEF2C      | 2651.62251 | 1.39697619 | 0.0001761  | 0.00475463 |
| NLRP1      | 731.910167 | 1.73847958 | 0.00017847 | 0.00481015 |
| CNTN2      | 10.7852227 | 3.11241158 | 0.0001792  | 0.00482141 |
| CCDC88B    | 523.941742 | 1.97466119 | 0.00018049 | 0.00484587 |
| GGTA1P     | 451.984114 | 1.77270456 | 0.00018074 | 0.00484587 |
| MPND       | 170.852401 | -1.1691757 | 0.00018133 | 0.00485314 |
| LOC283922  | 556.880925 | 0.86035315 | 0.0001828  | 0.00488422 |
| NOP10      | 500.807821 | -0.9863494 | 0.00018394 | 0.00490607 |
| EMILIN1    | 1893.80821 | 1.7897165  | 0.00018619 | 0.00493763 |
| GAB3       | 331.116839 | 1.48265017 | 0.00018612 | 0.00493763 |
| THRB       | 109.527029 | 2.73780905 | 0.00018641 | 0.00493763 |
| UBAP1      | 1375.42846 | -0.872579  | 0.00018546 | 0.00493763 |
| TMEM218    | 259.375198 | 0.73656115 | 0.00018679 | 0.00493917 |
| KIAA1522   | 1135.1823  | -1.9172124 | 0.00018849 | 0.00497517 |
| MAP10      | 98.4568366 | -1.4713819 | 0.00018896 | 0.00497517 |
| MYH3       | 86.0329407 | 1.61745194 | 0.00018912 | 0.00497517 |
| GLP1R      | 43.7250765 | -3.0331997 | 0.00018998 | 0.00498922 |
| PIGZ       | 169.348199 | 1.49184313 | 0.00019186 | 0.00502984 |
| GSTM2      | 455.514939 | 1.61589855 | 0.00019268 | 0.00504291 |
| NSUN5P1    | 589.530764 | 1.62388404 | 0.00019399 | 0.00506033 |
| SNORA20    | 19.4358215 | 2.50229536 | 0.00019401 | 0.00506033 |
| PYROXD1    | 513.131255 | -1.3291566 | 0.00019435 | 0.00506078 |
| GOS2       | 72.2470203 | -2.8415676 | 0.00019582 | 0.00509037 |
| CLPTM1     | 1677.44311 | -0.6832993 | 0.00019789 | 0.00512865 |
| FIZ1       | 147.828598 | -1.1781114 | 0.00019796 | 0.00512865 |
| DNASE1L3   | 868.874127 | 2.68518059 | 0.00019952 | 0.00515166 |
| SHISA6     | 361.395124 | 2.59157004 | 0.00019947 | 0.00515166 |
| MXD4       | 1987.32566 | 0.8671411  | 0.00020034 | 0.00516407 |
| HPRT1      | 268.798617 | -1.4893937 | 0.00020254 | 0.00521204 |

|            |            |            |            |            |
|------------|------------|------------|------------|------------|
| LOC1019270 | 252.904538 | 1.20131579 | 0.00020802 | 0.00533965 |
| MCM5       | 471.793998 | 0.72225386 | 0.00020819 | 0.00533965 |
| SOX9       | 23.2504587 | -2.9220984 | 0.0002112  | 0.00540772 |
| RABIF      | 263.922879 | -1.1489607 | 0.00021233 | 0.00542768 |
| MED4       | 785.10841  | -0.5709804 | 0.00021303 | 0.00543642 |
| CALCR      | 18.8226921 | 2.45916663 | 0.00021457 | 0.00546667 |
| C20orf197  | 36.5847515 | 2.23582047 | 0.00021577 | 0.00547917 |
| DHCR24     | 1925.64843 | -2.5705388 | 0.00021556 | 0.00547917 |
| FUT4       | 326.038951 | 1.02115279 | 0.00021932 | 0.00555955 |
| ZNF444     | 188.642946 | -0.6780862 | 0.00021966 | 0.00555955 |
| EMC3-AS1   | 133.059711 | 1.89979701 | 0.0002202  | 0.00556399 |
| IL17RB     | 61.4500191 | 2.42490092 | 0.00022222 | 0.00560136 |
| RAC1       | 4455.22706 | -0.5771551 | 0.00022241 | 0.00560136 |
| CD244      | 15.4490828 | 2.6568497  | 0.00022537 | 0.00564628 |
| HNRNPM     | 2038.38977 | -0.7024271 | 0.00022556 | 0.00564628 |
| NACC1      | 1179.95139 | -1.1121407 | 0.00022566 | 0.00564628 |
| TAL1       | 272.79669  | 2.47126209 | 0.0002251  | 0.00564628 |
| GLT8D1     | 1011.94515 | 0.87816263 | 0.00022645 | 0.00565686 |
| POLR2M     | 114.577832 | -0.9627565 | 0.00022897 | 0.00571048 |
| CCDC121    | 89.1345341 | 1.17868351 | 0.00022975 | 0.00572055 |
| AGPAT4     | 529.12144  | 1.08075165 | 0.00023217 | 0.00577152 |
| FMO1       | 1344.16604 | 2.804712   | 0.00023573 | 0.00584451 |
| TXLNG      | 831.846009 | -1.1526509 | 0.00023586 | 0.00584451 |
| RPLP1      | 10798.7556 | -1.2888054 | 0.0002414  | 0.00597206 |
| MT1M       | 31.2152843 | 2.73969367 | 0.0002441  | 0.00602918 |
| SHMT2      | 1060.13508 | -1.2224278 | 0.00025051 | 0.00617739 |
| ST5        | 1220.11172 | 0.73194388 | 0.00025169 | 0.00619659 |
| ZNF628     | 107.03335  | -1.2568553 | 0.00025359 | 0.00623356 |
| CIB1       | 511.522479 | -1.2605273 | 0.00025947 | 0.00636775 |
| CCDC102A   | 255.324377 | 1.30030086 | 0.00026044 | 0.00637249 |
| COX5A      | 429.782307 | -1.274571  | 0.00026049 | 0.00637249 |
| ERCC1      | 1473.70876 | 0.77806067 | 0.0002615  | 0.00638691 |
| CCDC92     | 673.497711 | -1.1669481 | 0.00026243 | 0.00639943 |
| HNRNPA0    | 2304.32732 | -0.8173607 | 0.00026572 | 0.00646946 |
| ACD        | 187.789044 | 0.96015521 | 0.00026828 | 0.00651118 |
| TMEM229B   | 63.2061408 | 1.43126959 | 0.00026827 | 0.00651118 |
| NFYC-AS1   | 114.489439 | 1.28723759 | 0.00026901 | 0.00651854 |
| ZNF331     | 1140.87662 | -1.5215835 | 0.0002718  | 0.00657574 |
| TBXA2R     | 40.5754317 | 2.37653074 | 0.00027959 | 0.00675362 |
| NLGN3      | 400.216541 | 2.59191746 | 0.00028022 | 0.00675818 |
| HOXC6      | 37.3483962 | 3.03567396 | 0.00028139 | 0.00677575 |
| DYNLRB1    | 1326.49131 | -1.1120844 | 0.00028848 | 0.00693563 |
| PCBP2-OT1  | 55.9247458 | -1.2388719 | 0.00028926 | 0.00694365 |
| SNAP91     | 164.207432 | 2.73410439 | 0.00029382 | 0.00704208 |
| KLHL5      | 1377.96127 | 1.18275094 | 0.00029609 | 0.00708538 |
| ZNF213-AS1 | 59.0027929 | 1.17928156 | 0.00030172 | 0.00720883 |
| CCDC142    | 337.560478 | 1.04723596 | 0.00030219 | 0.00720895 |
| LINC00899  | 42.3066193 | 1.33401247 | 0.00030283 | 0.00721076 |
| S100A14    | 14.9285169 | -2.9356745 | 0.00030321 | 0.00721076 |
| KLHDC4     | 217.833784 | 0.83869665 | 0.00030653 | 0.00727862 |

|            |            |            |            |            |
|------------|------------|------------|------------|------------|
| LOC1005070 | 44.0152643 | 1.80713481 | 0.00031212 | 0.00739993 |
| FAT1       | 11804.1656 | 1.36601671 | 0.00031619 | 0.00748479 |
| EIF3J      | 874.613396 | -1.0149766 | 0.00031732 | 0.00749996 |
| ASPRV1     | 90.8056375 | 1.87331195 | 0.00031985 | 0.00753648 |
| TSPAN32    | 15.1631121 | 2.77056904 | 0.00031937 | 0.00753648 |
| INMT-FAM18 | 18.272538  | 3.03176381 | 0.0003247  | 0.00762952 |
| OLFML3     | 2837.40513 | 1.83724698 | 0.00032528 | 0.00762952 |
| YWHAB      | 4771.75474 | -0.7788141 | 0.00032528 | 0.00762952 |
| RBM42      | 743.473457 | -0.6790696 | 0.00032627 | 0.00764093 |
| ECH1       | 800.723944 | -0.8660693 | 0.00032758 | 0.00765518 |
| NFIL3      | 559.549207 | -2.2427688 | 0.00032787 | 0.00765518 |
| DNAH12     | 112.597017 | 2.08651825 | 0.00032957 | 0.00768316 |
| RAB8A      | 1343.44876 | -0.7279304 | 0.00033341 | 0.00776088 |
| AHSA2      | 2151.95459 | 1.20593454 | 0.00033401 | 0.00776317 |
| SELV       | 11.0631401 | 3.00296395 | 0.00033699 | 0.0078204  |
| LINGO1     | 89.1327654 | 1.71982627 | 0.00033946 | 0.00786603 |
| LGALS3     | 2758.87908 | -2.3275068 | 0.00034103 | 0.0078718  |
| LRRN2      | 104.340232 | 2.78930774 | 0.00034125 | 0.0078718  |
| MYO15B     | 3435.33817 | 1.58946885 | 0.00034079 | 0.0078718  |
| PDCD4-AS1  | 37.1261607 | 1.82495455 | 0.00034379 | 0.0079185  |
| ATP5J      | 901.858027 | -1.1357713 | 0.00034454 | 0.007924   |
| NT5C1A     | 39.783805  | 2.9038844  | 0.00034551 | 0.00793423 |
| HTR2C      | 11.4203673 | 2.99991886 | 0.00034619 | 0.00793685 |
| TOB1       | 2285.526   | -1.4578427 | 0.00034665 | 0.00793685 |
| LOC284837  | 24.2106835 | 2.79231737 | 0.00034795 | 0.00795471 |
| AKAP13     | 15762.1019 | -0.6351438 | 0.00035091 | 0.00795652 |
| IGFBPL1    | 18.272326  | -2.8051793 | 0.00034913 | 0.00795652 |
| ITIH3      | 35.3523426 | 2.82417508 | 0.00035133 | 0.00795652 |
| NCALD      | 1336.70974 | -2.7558345 | 0.00035166 | 0.00795652 |
| PRKCZ      | 99.5698894 | -2.5114033 | 0.00034929 | 0.00795652 |
| TMOD1      | 5538.83732 | -1.554256  | 0.00035124 | 0.00795652 |
| TRAPPC5    | 334.362878 | -0.8510535 | 0.00035144 | 0.00795652 |
| ANO9       | 54.8499357 | -2.6480902 | 0.00035402 | 0.00795964 |
| DTNBP1     | 178.488673 | -0.9864221 | 0.00035422 | 0.00795964 |
| RBM45      | 232.651083 | 0.7494583  | 0.00035232 | 0.00795964 |
| SLC12A2    | 9822.45764 | -1.6249572 | 0.00035289 | 0.00795964 |
| SLC7A6     | 1317.94558 | 1.14897995 | 0.00035438 | 0.00795964 |
| PLCB2      | 1144.98014 | 1.75220463 | 0.00035615 | 0.00798765 |
| PLAG1      | 78.8652914 | 1.99631096 | 0.00035701 | 0.00799517 |
| CHMP2A     | 1131.31038 | -1.0542    | 0.00035928 | 0.00803438 |
| GTF2IRD2   | 149.040519 | 0.99658929 | 0.0003603  | 0.00804556 |
| SCG5       | 264.329547 | -2.838892  | 0.00036503 | 0.00813923 |
| LUCAT1     | 9.22816383 | -3.0262714 | 0.0003696  | 0.0082012  |
| NKAP       | 387.141917 | -1.0354165 | 0.00036928 | 0.0082012  |
| PTTG2      | 10.102701  | 2.56863028 | 0.00036994 | 0.0082012  |
| SNRPF      | 292.586193 | -1.3201248 | 0.0003695  | 0.0082012  |
| LINC00342  | 744.689092 | 0.8764764  | 0.00037793 | 0.00835686 |
| PLA2G7     | 33.4020891 | -2.6415058 | 0.00037805 | 0.00835686 |
| WSCD2      | 54.7271143 | 2.86735748 | 0.00038224 | 0.0084373  |
| ENO3       | 63.650615  | 2.04642941 | 0.00038394 | 0.00845049 |

|            |            |            |            |            |
|------------|------------|------------|------------|------------|
| HLA-DRB5   | 1552.58546 | 2.80126178 | 0.00038378 | 0.00845049 |
| SNORA48    | 966.393958 | 1.53860525 | 0.00038999 | 0.00857148 |
| CDK18      | 202.738754 | -1.3351657 | 0.00039127 | 0.00858734 |
| LOC1002893 | 14.3711941 | 2.22730826 | 0.0003928  | 0.00860849 |
| LOC729603  | 311.237427 | -1.0936389 | 0.000394   | 0.00862261 |
| DENND4A    | 2411.69674 | -0.9291077 | 0.00039754 | 0.00868742 |
| ZKSCAN7    | 207.292828 | 1.00328304 | 0.0003981  | 0.00868742 |
| ANKRD36    | 2110.02394 | 0.79689211 | 0.00040108 | 0.00874016 |
| TUBB4B     | 2459.56947 | -1.4930266 | 0.00040417 | 0.008795   |
| TRMT61B    | 228.02174  | 0.80183387 | 0.00040846 | 0.00887582 |
| TOP1MT     | 211.848651 | -2.0004343 | 0.0004109  | 0.00891628 |
| RNF166     | 465.053427 | 1.21736561 | 0.00041509 | 0.00898175 |
| SGPP2      | 248.851816 | -2.8905812 | 0.00041457 | 0.00898175 |
| ACCS       | 410.051684 | 1.48826195 | 0.00042002 | 0.00907557 |
| CYB561A3   | 882.024446 | 1.19620023 | 0.00042534 | 0.00917764 |
| CAPNS1     | 4690.65513 | -0.8133051 | 0.00042614 | 0.009182   |
| DLGAP4     | 1309.42927 | -1.1024314 | 0.00043325 | 0.00930908 |
| TRIM29     | 457.270295 | -2.7948442 | 0.00043272 | 0.00930908 |
| PI3        | 11.6680324 | -3.0416101 | 0.00043952 | 0.00943056 |
| LMO3       | 60.8938863 | 2.91116516 | 0.00044244 | 0.00945998 |
| MMRN1      | 354.25081  | -2.3335649 | 0.00044273 | 0.00945998 |
| ZFR2       | 13.6986409 | 2.96213228 | 0.00044192 | 0.00945998 |
| PCGF6      | 158.800389 | 0.78756202 | 0.00044374 | 0.00946838 |
| ADRA2A     | 13.2014956 | 2.66873848 | 0.00044747 | 0.00952153 |
| SRXN1      | 777.431352 | -1.1253822 | 0.00044736 | 0.00952153 |
| ZNF664     | 2776.82718 | -1.1288352 | 0.00044812 | 0.00952207 |
| RALY       | 2036.47482 | -0.9270183 | 0.00044878 | 0.00952284 |
| MB21D2     | 139.219315 | 1.54378255 | 0.0004497  | 0.00952935 |
| MYO1A      | 44.7143486 | -2.3065836 | 0.00045182 | 0.009561   |
| SLC2A12    | 944.894999 | 2.0665868  | 0.00045408 | 0.00958255 |
| SPTSSA     | 421.142109 | -0.9841961 | 0.00045394 | 0.00958255 |
| SLC38A10   | 2836.35803 | 0.99946174 | 0.00045603 | 0.00961035 |
| POLR2I     | 250.763643 | -1.0172116 | 0.00045979 | 0.00967648 |
| PAICS      | 1166.22355 | -0.9719581 | 0.00046195 | 0.00970862 |
| CNTN6      | 55.0477926 | 2.5997682  | 0.00046296 | 0.00971643 |
| FAM91A1    | 5322.97057 | -2.0509746 | 0.00046613 | 0.00976959 |
| CX3CL1     | 462.72946  | 1.96911194 | 0.0004706  | 0.00984983 |
| ADCY7      | 2730.03658 | 1.24281606 | 0.0004714  | 0.00985332 |
| PMP22      | 2339.5485  | 1.43133474 | 0.00047448 | 0.00990409 |
| SLC2A14    | 45.6463543 | -2.8330244 | 0.00047685 | 0.00994011 |
| PROM1      | 95.1881815 | 2.94861032 | 0.00048173 | 0.0100282  |
| SNORD15A   | 10.8161993 | 2.35692686 | 0.00049055 | 0.01019796 |
| BRINP1     | 68.7483317 | 2.88252422 | 0.00049171 | 0.01020828 |
| ARRDC5     | 34.302494  | 2.31017883 | 0.00049369 | 0.01022173 |
| NXT1       | 156.005371 | -0.9029805 | 0.00049314 | 0.01022173 |
| C21orf58   | 87.7394743 | 1.22654822 | 0.00049608 | 0.01024358 |
| CHI3L2     | 106.860338 | -2.7879451 | 0.00049591 | 0.01024358 |
| SKAP2      | 891.470399 | 1.08767889 | 0.00050279 | 0.01036827 |
| PLP2       | 664.618069 | -1.3253636 | 0.00050452 | 0.01039005 |
| ADAP1      | 130.556636 | 1.8302063  | 0.00051094 | 0.01050813 |

|            |            |            |            |            |
|------------|------------|------------|------------|------------|
| SH3TC1     | 1048.86542 | 1.66061068 | 0.00051273 | 0.01053086 |
| LINC00857  | 28.2462493 | 2.20758411 | 0.00051406 | 0.01054396 |
| LOC283335  | 141.036405 | -1.0145273 | 0.00051895 | 0.01063014 |
| GGNBP2     | 1482.79294 | -0.611821  | 0.00052191 | 0.01066228 |
| PCDH11Y    | 8.25868798 | -3.0009378 | 0.0005216  | 0.01066228 |
| GPR64      | 153.234847 | -2.5472065 | 0.00052681 | 0.01074828 |
| GPR126     | 613.497559 | 1.76380886 | 0.00053079 | 0.01081502 |
| SEC31B     | 741.009322 | 0.96308053 | 0.00053339 | 0.01085355 |
| SRC        | 710.208087 | -0.9228226 | 0.00053553 | 0.0108827  |
| NBPF8      | 305.11098  | 1.4250019  | 0.00053851 | 0.0109288  |
| ANKRD1     | 10.5070028 | -2.975374  | 0.00053991 | 0.01094273 |
| FAM26E     | 659.546449 | 1.55320548 | 0.00054216 | 0.01094581 |
| MORF4L2    | 3825.56092 | -0.8569618 | 0.0005411  | 0.01094581 |
| PITPNM3    | 265.023476 | -1.8151033 | 0.0005422  | 0.01094581 |
| CH25H      | 115.36178  | 2.2914093  | 0.00054446 | 0.01097633 |
| RFX5       | 1026.69753 | 0.92998575 | 0.00054514 | 0.01097633 |
| P2RY12     | 468.826547 | 2.11930653 | 0.0005465  | 0.01098938 |
| ANKRD65    | 30.1232521 | 2.64911908 | 0.00054997 | 0.01104469 |
| COL5A2     | 7569.29394 | 1.10113393 | 0.00055228 | 0.01107657 |
| MED16      | 869.328762 | -0.7420391 | 0.00055939 | 0.01118997 |
| ZNF468     | 289.165284 | -0.7393391 | 0.00055931 | 0.01118997 |
| LARS2      | 486.762594 | 0.74902749 | 0.00056066 | 0.0112009  |
| ATE1-AS1   | 31.9303135 | 2.18710526 | 0.0005656  | 0.01123571 |
| EML1       | 523.020245 | 1.31777436 | 0.00056447 | 0.01123571 |
| LOC554206  | 20.1427993 | 1.75056002 | 0.00056536 | 0.01123571 |
| RHOV       | 18.7618804 | -2.8783546 | 0.00056606 | 0.01123571 |
| TAB3       | 1068.96705 | -0.917986  | 0.00056606 | 0.01123571 |
| COL4A6     | 67.7702959 | 2.47816879 | 0.00057152 | 0.01128551 |
| L1CAM      | 8.97877941 | -2.2330204 | 0.00057225 | 0.01128551 |
| MAP3K7CL   | 133.072131 | -1.449747  | 0.00057122 | 0.01128551 |
| SLC29A1    | 2944.39416 | 1.77596797 | 0.00057032 | 0.01128551 |
| TNN        | 62.1486847 | 2.55357225 | 0.00057165 | 0.01128551 |
| LOC283194  | 20.0791799 | 1.99008175 | 0.00057311 | 0.01128807 |
| APEX2      | 252.523917 | -0.6339777 | 0.00057434 | 0.01129786 |
| MRPL4      | 465.151375 | -0.6475811 | 0.00057521 | 0.01130046 |
| PLEKHH2    | 3748.01927 | 2.28258298 | 0.00058106 | 0.01140089 |
| RAB21      | 1339.04178 | -0.7948574 | 0.00058438 | 0.01143676 |
| TM6SF1     | 344.173426 | 1.49557378 | 0.000584   | 0.01143676 |
| HEXIM1     | 798.856244 | -1.1706063 | 0.00059058 | 0.01152878 |
| LOC1005065 | 70.1411182 | 2.13599161 | 0.00059044 | 0.01152878 |
| ZNF708     | 1273.53564 | -0.9973838 | 0.00059136 | 0.01152928 |
| CLEC9A     | 167.584276 | 2.38036357 | 0.00059286 | 0.01154378 |
| KCNJ3      | 36.6410769 | 2.89300108 | 0.00059625 | 0.01159509 |
| CDC16      | 1293.64053 | -0.8800938 | 0.00059937 | 0.01163289 |
| LARP1B     | 917.856775 | -1.5204984 | 0.0005997  | 0.01163289 |
| KIF27      | 288.775451 | 0.90224899 | 0.00060106 | 0.0116444  |
| C21orf15   | 486.85702  | 2.91223024 | 0.00060212 | 0.01165041 |
| PRMT7      | 498.536886 | 0.86156564 | 0.00060445 | 0.01166611 |
| USP42      | 434.393791 | -0.6576492 | 0.00060388 | 0.01166611 |
| ADSS       | 793.510239 | -0.7198737 | 0.00061178 | 0.01179278 |



|            |            |            |            |            |
|------------|------------|------------|------------|------------|
| CD55       | 1995.7422  | -1.8627513 | 0.00061559 | 0.01181741 |
| CRTAM      | 20.0103468 | 2.32244284 | 0.00061409 | 0.01181741 |
| FAM26F     | 89.4034197 | 1.73619366 | 0.00061574 | 0.01181741 |
| NAA20      | 650.607461 | -1.0322253 | 0.00061614 | 0.01181741 |
| DYNLL1     | 1700.1442  | -0.9863603 | 0.00062272 | 0.01191607 |
| HS3ST3B1   | 103.954537 | 2.34919171 | 0.00062283 | 0.01191607 |
| VTN        | 381.788056 | -2.1751177 | 0.00062438 | 0.01193085 |
| LYNX1      | 967.467142 | 1.41154922 | 0.00062588 | 0.01194467 |
| ALDH1L1    | 132.396819 | 2.47489375 | 0.00062722 | 0.01195525 |
| LOC1019296 | 34.5724581 | 2.78968797 | 0.00062987 | 0.011991   |
| ITGAM      | 1337.93296 | 1.91490502 | 0.00063731 | 0.01211764 |
| PYCR1      | 512.518961 | 1.86588997 | 0.00063997 | 0.01215304 |
| FEM1A      | 819.666195 | -0.7783693 | 0.00064142 | 0.01216556 |
| CNKSR3     | 722.684385 | 1.32284133 | 0.00064808 | 0.01224658 |
| CTXN1      | 41.4439617 | -1.5952942 | 0.0006468  | 0.01224658 |
| FGF20      | 9.08365234 | 2.68765234 | 0.00064763 | 0.01224658 |
| MAP3K9     | 183.155383 | -1.376877  | 0.00064926 | 0.01225372 |
| MIR22HG    | 748.438678 | -0.9396079 | 0.00065163 | 0.01228351 |
| DTWD1      | 489.633382 | -0.5816683 | 0.00065337 | 0.01228723 |
| TANGO6     | 587.773382 | 0.94970647 | 0.00065343 | 0.01228723 |
| UBQLN1     | 2394.5701  | -0.8037117 | 0.00065548 | 0.01231066 |
| SIRT5      | 372.196089 | 0.74999464 | 0.0006606  | 0.01239177 |
| SNRNP200   | 5828.95751 | -0.7243455 | 0.00066842 | 0.01252311 |
| MYCBPAP    | 35.8417566 | 2.07086762 | 0.00067088 | 0.01255382 |
| FBRSL1     | 568.410013 | -1.0722577 | 0.00067633 | 0.01262924 |
| OSBP2      | 67.2768678 | -2.3478933 | 0.00067655 | 0.01262924 |
| EZH2       | 134.918189 | -1.1593346 | 0.00067856 | 0.01265143 |
| LMCD1      | 503.019432 | 2.4211768  | 0.00067992 | 0.01266127 |
| ACAN       | 113.228601 | 2.67576287 | 0.00070387 | 0.01304727 |
| CD37       | 250.986186 | 1.76639296 | 0.00070539 | 0.01304727 |
| HCCS       | 276.042035 | -1.1963855 | 0.00070307 | 0.01304727 |
| SAFB2      | 978.032607 | -0.6653934 | 0.00070282 | 0.01304727 |
| SCAND1     | 295.476764 | -0.8983478 | 0.00070647 | 0.01304727 |
| TNFAIP8L2  | 104.010358 | 1.82210148 | 0.00070659 | 0.01304727 |
| YWHAE      | 6446.54376 | -0.7054838 | 0.00070409 | 0.01304727 |
| PGK1       | 5621.27847 | -1.3809556 | 0.00072342 | 0.01334195 |
| NPY1R      | 667.073166 | -2.7639848 | 0.00073423 | 0.01352511 |
| LOC1005064 | 17.0189156 | 2.79063123 | 0.00073586 | 0.01353889 |
| B4GALT5    | 1583.03869 | -1.1518194 | 0.00074361 | 0.01365152 |
| PLAGL2     | 436.443136 | -0.9955791 | 0.00074376 | 0.01365152 |
| PTPN1      | 1253.72041 | -1.0971926 | 0.00074757 | 0.01370519 |
| CHAC1      | 11.961101  | -2.0246988 | 0.00075707 | 0.01386283 |
| PROSER1    | 583.99514  | -0.9022396 | 0.00075838 | 0.01387014 |
| LINC01197  | 90.6975195 | 2.8297986  | 0.00076661 | 0.0140041  |
| MAPK6      | 1080.27006 | -1.0645586 | 0.00077333 | 0.01411011 |
| PCDHGA12   | 1120.5838  | 1.82584859 | 0.00077644 | 0.01411921 |
| PRPS1      | 529.18021  | -0.8550471 | 0.00077613 | 0.01411921 |
| UBE2I      | 1087.45472 | -0.4297189 | 0.00077659 | 0.01411921 |
| KCND3      | 64.3494095 | -1.3916829 | 0.00077954 | 0.01415616 |
| TPP1       | 2886.47553 | -0.9934917 | 0.00078161 | 0.01417686 |

|            |            |            |            |            |
|------------|------------|------------|------------|------------|
| RITA1      | 305.516166 | -1.0321989 | 0.00078435 | 0.01420989 |
| SRGAP1     | 1114.17869 | -1.3567124 | 0.00078914 | 0.01427985 |
| ZNF335     | 779.18713  | -0.732305  | 0.00079078 | 0.01429261 |
| BST1       | 328.632774 | 2.01882266 | 0.00079602 | 0.01433698 |
| ITM2A      | 4918.93021 | 1.83461894 | 0.00079603 | 0.01433698 |
| SPARCL1    | 13563.394  | 1.03601134 | 0.000796   | 0.01433698 |
| ZNF28      | 437.737883 | -0.7719668 | 0.00079804 | 0.01435626 |
| RPS28      | 2398.57962 | -0.8680456 | 0.00080585 | 0.01447987 |
| CNKS2      | 53.9463656 | 2.58935404 | 0.00081386 | 0.01460661 |
| TNFRSF25   | 111.059158 | 1.66190379 | 0.00081578 | 0.0146241  |
| NEDD9      | 1028.66802 | 1.35040323 | 0.00081907 | 0.01466594 |
| ALMS1-IT1  | 21.0807911 | 1.91519363 | 0.00082503 | 0.01473822 |
| CD74       | 27903.7822 | 1.55090344 | 0.00082474 | 0.01473822 |
| FAM105A    | 2101.89535 | 1.54557377 | 0.0008261  | 0.01474024 |
| LARP4      | 1938.08526 | -0.7317741 | 0.00083383 | 0.0148265  |
| P2RX1      | 17.5707629 | 2.09152965 | 0.00083361 | 0.0148265  |
| SDC4       | 981.563555 | -1.6015522 | 0.00083374 | 0.0148265  |
| CELSR1     | 617.222911 | -2.5172049 | 0.0008382  | 0.01488704 |
| GPX7       | 209.97616  | 1.59682979 | 0.0008465  | 0.01501707 |
| PEX6       | 677.137069 | 0.78134545 | 0.00086083 | 0.01525373 |
| PLXDC2     | 6200.63632 | 1.5055388  | 0.00086349 | 0.01528257 |
| TRIM6      | 260.984242 | -1.2166999 | 0.00086445 | 0.01528257 |
| CHN1       | 1133.14152 | -1.3703171 | 0.00086916 | 0.01532277 |
| PLAA       | 925.472586 | -0.826155  | 0.00086907 | 0.01532277 |
| PPP2R2C    | 49.3000361 | -2.3890317 | 0.00086972 | 0.01532277 |
| SPTA1      | 8.30054004 | 2.39940616 | 0.0008709  | 0.01532604 |
| STAU1      | 2588.1545  | -0.6101138 | 0.00087829 | 0.01543837 |
| LOC1019272 | 34.4676324 | 2.81142626 | 0.00088224 | 0.01549016 |
| TACC2      | 912.585772 | -0.8984607 | 0.00088664 | 0.01554965 |
| VENTX      | 295.629809 | 2.15843492 | 0.00088919 | 0.01557646 |
| SCARA3     | 4138.13101 | -0.8704819 | 0.00089081 | 0.01558719 |
| PSMG1      | 316.84735  | -0.9772474 | 0.00089387 | 0.01562293 |
| MKS1       | 187.278592 | 0.77831039 | 0.00089601 | 0.01564256 |
| PLXNA1     | 2568.02638 | 1.21292263 | 0.0008982  | 0.01566288 |
| COG4       | 1092.30005 | 0.81853927 | 0.00090017 | 0.01567948 |
| ZNF843     | 18.1188645 | 2.2196551  | 0.000907   | 0.0157805  |
| HSP90AA1   | 10270.4635 | -1.1153391 | 0.00090804 | 0.01578082 |
| HSD11B1    | 56.2220665 | 2.70056952 | 0.00091026 | 0.01580157 |
| ABHD17C    | 328.589086 | -1.0532266 | 0.00092504 | 0.0160255  |
| CYP4X1     | 1892.73979 | 1.6403022  | 0.00092653 | 0.0160255  |
| IL11RA     | 853.990418 | 2.05444802 | 0.00092783 | 0.0160255  |
| LINC01125  | 41.7246802 | 1.61641355 | 0.00092838 | 0.0160255  |
| RBP4       | 296.653008 | 2.5277803  | 0.00092836 | 0.0160255  |
| C8orf31    | 49.3788267 | 2.57158589 | 0.00093224 | 0.01607416 |
| EMILIN2    | 944.124508 | -2.5142302 | 0.00094157 | 0.0162167  |
| FARSA      | 725.191125 | -0.6823301 | 0.00094331 | 0.01622859 |
| HSPG2      | 8969.25753 | 1.63771893 | 0.00094513 | 0.01624171 |
| XAF1       | 1130.46438 | 1.00351588 | 0.00094711 | 0.01625753 |
| CDK16      | 1244.51021 | -0.6020316 | 0.00095407 | 0.01633035 |
| MBTPS1     | 3447.43838 | 0.74203704 | 0.00095451 | 0.01633035 |

|            |            |            |            |            |
|------------|------------|------------|------------|------------|
| VGLL3      | 259.533578 | -2.7300103 | 0.00095454 | 0.01633035 |
| CDC14B     | 900.759176 | 1.43263615 | 0.00095825 | 0.0163573  |
| PAR6B      | 149.72241  | -1.9444067 | 0.00095791 | 0.0163573  |
| BDH2       | 990.976214 | 0.82211549 | 0.000964   | 0.01641898 |
| ZCCHC18    | 14.6955234 | 2.1870727  | 0.00096358 | 0.01641898 |
| ICK        | 1191.90816 | 1.04525811 | 0.00097428 | 0.01657573 |
| STAG3      | 38.5199782 | 1.75721961 | 0.00097573 | 0.016582   |
| DENND6A    | 1330.55839 | 0.69142091 | 0.00098283 | 0.01667242 |
| FAM72B     | 21.9865099 | 1.94051798 | 0.00098322 | 0.01667242 |
| CLEC4F     | 7.93549843 | 2.58998164 | 0.00098882 | 0.01674114 |
| YWHAQ      | 3649.59078 | -0.6425057 | 0.00098945 | 0.01674114 |
| SYT17      | 49.7533372 | 1.86444042 | 0.00099202 | 0.01676615 |
| ENTPD3-AS1 | 41.7059566 | 1.45964853 | 0.00099315 | 0.01676675 |
| IFNAR2     | 462.576349 | -1.1813822 | 0.0009959  | 0.016791   |
| ZPR1       | 493.415857 | -0.791873  | 0.00099677 | 0.016791   |
| PYGB       | 3199.95586 | -0.7667665 | 0.0010055  | 0.0169195  |
| INO80C     | 139.883804 | -1.708679  | 0.0010067  | 0.01692116 |
| ATP5G2     | 1876.55627 | -0.6604709 | 0.00100866 | 0.01693556 |
| PPME1      | 806.349812 | -0.9126827 | 0.00100989 | 0.01693774 |
| MYLK4      | 944.623857 | 2.32136327 | 0.00101368 | 0.0169828  |
| CALM3      | 4527.60911 | -0.9044738 | 0.00101805 | 0.01701197 |
| CEP97      | 378.816246 | 0.61351346 | 0.00101718 | 0.01701197 |
| NOTCH2     | 11985.7594 | 0.76224265 | 0.00101875 | 0.01701197 |
| OR7E2P     | 40.6007925 | 2.55287914 | 0.00102075 | 0.01702697 |
| TOB2       | 1005.11243 | -0.6447044 | 0.00102316 | 0.01704863 |
| HSPA12A    | 962.726338 | 2.1852973  | 0.00102839 | 0.01711724 |
| IL15       | 71.7333825 | 1.80522795 | 0.0010296  | 0.0171188  |
| POLR3H     | 730.021962 | -0.6768681 | 0.00103125 | 0.01712765 |
| ELOVL6     | 243.996538 | -1.0141249 | 0.00103711 | 0.01720644 |
| ZSCAN31    | 273.735367 | 1.67510051 | 0.00104013 | 0.0172379  |
| COL6A1     | 16576.8415 | 1.16560707 | 0.00104136 | 0.01723969 |
| PPP1R7     | 548.219574 | -0.7162144 | 0.00104326 | 0.01725255 |
| IRF2BP1    | 403.649315 | -0.63473   | 0.0010503  | 0.01735031 |
| MYL4       | 9.51911381 | 2.77439521 | 0.00105383 | 0.017388   |
| REPS2      | 1602.69765 | -1.8413867 | 0.00105485 | 0.017388   |
| C19orf43   | 1315.33454 | -0.8918381 | 0.00106361 | 0.01740175 |
| DENND2C    | 382.57515  | 1.35017334 | 0.00106254 | 0.01740175 |
| MGARP      | 103.296838 | 2.76563456 | 0.00106107 | 0.01740175 |
| SIK1       | 3289.53546 | -2.1301428 | 0.00105821 | 0.01740175 |
| SNORA68    | 150.177336 | 1.59359503 | 0.00106265 | 0.01740175 |
| ZBTB8B     | 16.1528708 | 2.50722832 | 0.00105985 | 0.01740175 |
| ZC2HC1C    | 321.720164 | 2.14117091 | 0.00105891 | 0.01740175 |
| PAF1       | 1016.13852 | -0.9804156 | 0.00106591 | 0.01741417 |
| UBE2R2     | 1325.7681  | -0.7063894 | 0.00106664 | 0.01741417 |
| CXXC1      | 659.209284 | -0.5992859 | 0.00106829 | 0.0174227  |
| FILIP1     | 274.221638 | 1.97538108 | 0.00107555 | 0.01752245 |
| ARHGEF2    | 2060.67258 | -0.6621327 | 0.00107777 | 0.01754002 |
| CES1       | 80.0772939 | -2.7801426 | 0.00108174 | 0.01758604 |
| ERG        | 415.406522 | 1.18070454 | 0.00109126 | 0.01770331 |
| NIPA1      | 559.243424 | -0.9494003 | 0.00109067 | 0.01770331 |

|            |            |            |            |            |
|------------|------------|------------|------------|------------|
| SLC12A5    | 17.5516425 | 2.51584765 | 0.00109414 | 0.01773137 |
| KCTD20     | 2717.07642 | 0.61376702 | 0.0010978  | 0.01773462 |
| MALAT1     | 581262.618 | -0.9233516 | 0.00109781 | 0.01773462 |
| TMEM160    | 118.699612 | -0.9214542 | 0.00109582 | 0.01773462 |
| SEPSECS    | 501.07572  | 0.7578284  | 0.00110484 | 0.0178295  |
| EIF3M      | 1470.01782 | -0.4618596 | 0.00112034 | 0.01802282 |
| LOC146880  | 945.6103   | 0.97869019 | 0.00112019 | 0.01802282 |
| SOX5       | 21.2288512 | 2.30444436 | 0.00111992 | 0.01802282 |
| HES4       | 394.058654 | -1.8373378 | 0.00112473 | 0.01803122 |
| TUBB6      | 2304.71152 | -1.5526887 | 0.00112261 | 0.01803122 |
| UBAP2L     | 2554.30174 | -0.6389463 | 0.00112556 | 0.01803122 |
| ZBTB45     | 151.010001 | -0.7715005 | 0.00112404 | 0.01803122 |
| MRPS17     | 112.858545 | -0.8544914 | 0.00112739 | 0.0180418  |
| KRT80      | 15.8850111 | -2.8175413 | 0.00113038 | 0.01807082 |
| ARID2      | 2930.95575 | -0.8974984 | 0.0011387  | 0.01816599 |
| CYTH3      | 1689.58608 | 0.87198068 | 0.00113799 | 0.01816599 |
| SUMF1      | 913.374125 | 0.94468517 | 0.00114049 | 0.01817568 |
| FOLR1      | 104.53424  | 2.43392974 | 0.00114181 | 0.01817778 |
| TTY15      | 144.674926 | -2.7478788 | 0.00114879 | 0.01827011 |
| ANKRD36BP  | 8.94570356 | -2.1411573 | 0.00116946 | 0.01855307 |
| FAM207A    | 115.102646 | -1.0279334 | 0.00116892 | 0.01855307 |
| PATL2      | 19.9372947 | 1.81472094 | 0.00117021 | 0.01855307 |
| DCUN1D4    | 1532.67687 | -0.697135  | 0.00117349 | 0.01857648 |
| LOC1026064 | 32.0980222 | 1.53145872 | 0.0011741  | 0.01857648 |
| ATP6V1E2   | 15.645973  | 2.07315712 | 0.00118795 | 0.01875685 |
| ZKSCAN2    | 407.084356 | 0.67747018 | 0.00118682 | 0.01875685 |
| DEDD2      | 401.632871 | -0.8293514 | 0.0011918  | 0.01875984 |
| PCCA       | 1578.10228 | -0.9728506 | 0.00119085 | 0.01875984 |
| PPOX       | 243.424126 | 0.91032803 | 0.00119147 | 0.01875984 |
| RGS6       | 217.673851 | 2.63708066 | 0.00119888 | 0.01885191 |
| AHNAK2     | 6837.3737  | -1.961363  | 0.00120714 | 0.01894303 |
| NSFL1C     | 1134.49964 | -0.9271764 | 0.00120702 | 0.01894303 |
| ZNF789     | 99.9534675 | 1.04498206 | 0.00121579 | 0.01905938 |
| LOC1009964 | 24.4573534 | 2.46513057 | 0.00122375 | 0.01916461 |
| KAL1       | 495.14137  | -2.2546643 | 0.00123377 | 0.01930179 |
| ZBTB42     | 76.6851708 | -0.9546743 | 0.00123525 | 0.01930533 |
| EFNA1      | 365.936985 | -1.6811264 | 0.00124279 | 0.01940336 |
| TPST1      | 340.339045 | 0.96668341 | 0.0012488  | 0.01947752 |
| ZNF770     | 2102.87023 | -0.856476  | 0.00125089 | 0.01949032 |
| GABARAPL1  | 2650.75191 | -1.3568197 | 0.00125657 | 0.0195589  |
| CCDC59     | 320.925621 | -0.645198  | 0.00126225 | 0.01962753 |
| DYRK1A     | 2813.89754 | -0.5270539 | 0.00126802 | 0.01969393 |
| PTPN2      | 824.162323 | -0.7596321 | 0.00126909 | 0.01969393 |
| SNORA76A   | 11.1004    | 1.93413559 | 0.00127051 | 0.01969618 |
| HEMK1      | 753.040145 | 0.68872882 | 0.00129606 | 0.02007201 |
| RAI14      | 2214.71691 | 1.16356585 | 0.00130325 | 0.02016296 |
| TESK1      | 407.070341 | -0.770995  | 0.00130999 | 0.02024691 |
| AAR2       | 757.588061 | -0.760975  | 0.00131299 | 0.02027283 |
| LINC00277  | 33.3112644 | -1.9418688 | 0.00131492 | 0.02027297 |
| ZIC2       | 2932.51255 | -0.984875  | 0.00131564 | 0.02027297 |

|            |            |            |            |            |
|------------|------------|------------|------------|------------|
| PALD1      | 1875.49291 | 1.42150793 | 0.00131903 | 0.02030486 |
| RAE1       | 366.667449 | -0.648752  | 0.00132179 | 0.02032705 |
| HOXC4      | 77.8287601 | 2.42320267 | 0.00132415 | 0.02034177 |
| LINC01126  | 49.8742347 | 1.47032412 | 0.0013254  | 0.02034177 |
| HEPH       | 505.005289 | 2.47096262 | 0.00132937 | 0.02038229 |
| QRSL1      | 395.587687 | 0.82450477 | 0.00133126 | 0.02039095 |
| SLC22A17   | 939.011107 | 1.87596439 | 0.00133499 | 0.02042776 |
| FICD       | 144.788361 | -1.3889604 | 0.00133916 | 0.02047108 |
| HAUS4      | 420.474973 | 0.99966722 | 0.00134053 | 0.02047168 |
| FAM149A    | 277.037583 | 0.94048603 | 0.00134621 | 0.02053805 |
| BCAR3      | 698.789546 | 1.9795024  | 0.00135208 | 0.02060717 |
| AKIRIN2    | 447.940677 | -0.8612352 | 0.00136624 | 0.02080235 |
| CCDC175    | 37.3896108 | 2.72100209 | 0.00137234 | 0.02083321 |
| RPL36      | 3717.45865 | -0.5776176 | 0.00136992 | 0.02083321 |
| ZNF34      | 152.666586 | 1.14012939 | 0.0013711  | 0.02083321 |
| GLI1       | 412.792325 | 2.2365659  | 0.0013782  | 0.02090154 |
| CCDC146    | 209.745735 | 1.25231913 | 0.00138584 | 0.02099664 |
| C7orf55    | 82.4254991 | 1.03656787 | 0.00139062 | 0.02100834 |
| FLJ37453   | 65.0233476 | 1.45611682 | 0.00139345 | 0.02100834 |
| LOC1005070 | 22.2442451 | 2.22044638 | 0.00139216 | 0.02100834 |
| OGFRL1     | 2309.00431 | 0.84791517 | 0.00139278 | 0.02100834 |
| PLEKHA4    | 1439.30554 | -1.423249  | 0.0013906  | 0.02100834 |
| CGNL1      | 5844.24967 | 2.02958787 | 0.00140177 | 0.02109248 |
| PTGER4P2-C | 9.57455564 | 2.40369211 | 0.00140073 | 0.02109248 |
| DUSP27     | 78.5811565 | 2.16912083 | 0.00141365 | 0.02125045 |
| FAM103A1   | 229.91134  | -0.9511391 | 0.00141905 | 0.0212917  |
| PRAM1      | 108.949777 | 2.07283419 | 0.00141917 | 0.0212917  |
| WISP1      | 538.764784 | 2.16655897 | 0.00142318 | 0.02133107 |
| P2RX6      | 28.7386804 | 1.87154788 | 0.00142615 | 0.02135478 |
| LOC1019279 | 30.3768074 | 1.70226811 | 0.00143466 | 0.02146127 |
| HCST       | 123.8559   | 1.78479943 | 0.00143622 | 0.02146368 |
| EML4       | 2825.98344 | 1.03088331 | 0.00144685 | 0.02158061 |
| NCR3LG1    | 755.583902 | -1.9758151 | 0.001446   | 0.02158061 |
| MIR4458HG  | 89.4632416 | -1.7328132 | 0.00144982 | 0.02160391 |
| TBC1D25    | 404.375936 | -0.5938191 | 0.00145446 | 0.02165203 |
| AGTR1      | 25.9660885 | 2.52317574 | 0.00146019 | 0.02167847 |
| CHMP1B     | 4055.46689 | -1.7577772 | 0.00146098 | 0.02167847 |
| ERMAP      | 414.849023 | 0.96332662 | 0.00146188 | 0.02167847 |
| SCN2A      | 51.1583949 | 2.58723713 | 0.00146054 | 0.02167847 |
| ANKRD20A1  | 201.450185 | 2.68231403 | 0.00148594 | 0.02200586 |
| PLXNA3     | 1042.1828  | -1.2239455 | 0.00148927 | 0.02200586 |
| PRICKLE1   | 2894.65632 | 1.40949386 | 0.00148749 | 0.02200586 |
| SCN7A      | 16.8861966 | 2.64951885 | 0.00148969 | 0.02200586 |
| DHX37      | 481.49721  | -0.5261796 | 0.00149857 | 0.02209452 |
| HNRNPD     | 1346.3911  | -1.0437069 | 0.00149788 | 0.02209452 |
| SLC5A6     | 1562.17968 | 1.94463907 | 0.00150285 | 0.02213637 |
| SATB1      | 379.981436 | 1.0079687  | 0.00150719 | 0.02217911 |
| ZNF114     | 42.6631289 | -1.9431287 | 0.00150911 | 0.02218605 |
| FPR2       | 27.4219221 | -2.4673975 | 0.00151336 | 0.02222728 |
| SLC7A6OS   | 281.567253 | 0.69834976 | 0.00151624 | 0.02224839 |

|            |            |            |            |            |
|------------|------------|------------|------------|------------|
| ATL2       | 2019.19872 | 0.82423937 | 0.00152486 | 0.02228961 |
| CYFIP2     | 872.968479 | -1.740585  | 0.00152409 | 0.02228961 |
| INTU       | 615.860217 | 0.94858278 | 0.0015244  | 0.02228961 |
| NAT9       | 633.369841 | 0.88192502 | 0.001521   | 0.02228961 |
| CENPB      | 1527.75931 | -0.5420918 | 0.00152794 | 0.02229738 |
| CNPY4      | 520.14798  | 1.10232806 | 0.00152829 | 0.02229738 |
| LOC1005072 | 964.125649 | -0.6209755 | 0.00153173 | 0.02231152 |
| NFKBIB     | 191.472929 | -0.997279  | 0.00153217 | 0.02231152 |
| NCMAP      | 13.2149307 | 2.38281038 | 0.00154277 | 0.02244246 |
| RAP1B      | 1787.92277 | -1.0148277 | 0.00154408 | 0.02244246 |
| SLC25A35   | 83.2525919 | 1.16282881 | 0.00156788 | 0.02276693 |
| TSPEAR-AS1 | 21.2904657 | 2.70641589 | 0.00157087 | 0.02276724 |
| USP9Y      | 627.631464 | -2.6606418 | 0.00157011 | 0.02276724 |
| LOC1019288 | 15.9525686 | 1.94544699 | 0.00157666 | 0.02278664 |
| PKD2       | 2052.80445 | 1.13804419 | 0.00157379 | 0.02278664 |
| TLR7       | 370.044623 | 1.49162703 | 0.00157637 | 0.02278664 |
| WHAMM      | 369.998098 | -0.7851674 | 0.0015823  | 0.02284672 |
| ENKUR      | 331.401741 | 2.30071518 | 0.00158621 | 0.02287739 |
| IL16       | 523.56916  | 1.47773037 | 0.0015874  | 0.02287739 |
| C5orf20    | 7.84033378 | 2.6789673  | 0.00159302 | 0.02292111 |
| PDCD5      | 456.762476 | -1.0946706 | 0.00159342 | 0.02292111 |
| ST8SIA3    | 19.9043899 | -2.5429331 | 0.00159692 | 0.02294994 |
| MESDC2     | 1524.80499 | -0.6787367 | 0.00159872 | 0.0229544  |
| GTF2F1     | 1522.33263 | -0.4504496 | 0.0016006  | 0.02295988 |
| SEMA6D     | 905.59212  | 2.0953474  | 0.00160783 | 0.02304201 |
| EIF2S2     | 1633.4857  | -0.7326791 | 0.00161091 | 0.02306465 |
| ACSF3      | 385.111581 | 0.6683215  | 0.00161878 | 0.02315582 |
| ZNF512     | 1346.96089 | 0.51494357 | 0.00162199 | 0.02318015 |
| MTRNR2L9   | 97.6114117 | 1.32837789 | 0.00162414 | 0.02318927 |
| LOC1019268 | 38.7830338 | -1.9411603 | 0.00162605 | 0.02319499 |
| CCDC61     | 147.520262 | -0.8988594 | 0.0016384  | 0.02332578 |
| COMMD7     | 443.260818 | -0.825851  | 0.00163839 | 0.02332578 |
| FAH        | 204.895627 | -0.7818016 | 0.00163977 | 0.02332578 |
| DISC1      | 104.072874 | 1.0882703  | 0.00164805 | 0.02342182 |
| ROBO3      | 383.986556 | 2.09076596 | 0.00165638 | 0.02349672 |
| SLC24A4    | 50.8146034 | 2.05828656 | 0.00165579 | 0.02349672 |
| SMURF2     | 1125.35617 | 0.67534422 | 0.00165924 | 0.02351558 |
| CTDSP1     | 1541.21757 | 1.39531423 | 0.00167223 | 0.02367786 |
| YWHAH      | 2441.69563 | -0.6462981 | 0.00168282 | 0.02380579 |
| CSDC2      | 189.15081  | -2.345358  | 0.00168535 | 0.0238197  |
| NAPSB      | 235.78173  | 2.48565535 | 0.00168849 | 0.02384219 |
| TMEM139    | 8.47929031 | -2.5262378 | 0.00169202 | 0.02387003 |
| LARP1      | 5553.41802 | -0.7707082 | 0.00169784 | 0.02393024 |
| GREM2      | 116.584103 | 2.68578046 | 0.00170288 | 0.0239793  |
| AGAP11     | 566.029792 | 1.92462528 | 0.00171319 | 0.02410237 |
| TECR       | 1044.27913 | -1.3429278 | 0.00171624 | 0.0241232  |
| GALNT16    | 180.311506 | 1.77789096 | 0.00172635 | 0.02424307 |
| CEP41      | 295.582255 | 0.73353496 | 0.00173451 | 0.02433536 |
| DCAF13     | 391.661022 | -0.737234  | 0.00174041 | 0.02436914 |
| KIAA1107   | 193.673064 | 1.05534311 | 0.00174034 | 0.02436914 |

|            |            |            |            |            |
|------------|------------|------------|------------|------------|
| TMEM70     | 231.989601 | -0.7280152 | 0.00174167 | 0.02436914 |
| SLC39A10   | 1638.81575 | 0.76022306 | 0.00174934 | 0.0244542  |
| FKBP4      | 912.815214 | -0.8029926 | 0.00175331 | 0.02448732 |
| ZNF317     | 926.738309 | -0.3808276 | 0.00175619 | 0.02450529 |
| KDELC2     | 1509.3758  | 0.94064811 | 0.00175888 | 0.02452051 |
| IDH3A      | 826.166776 | -1.1091803 | 0.00176461 | 0.02455588 |
| ZFPM2      | 80.2586042 | 1.90157299 | 0.00176414 | 0.02455588 |
| LEPREL4    | 447.662148 | 1.21287678 | 0.00177026 | 0.02461225 |
| CLEC4E     | 151.988292 | 1.88829095 | 0.00177272 | 0.02462418 |
| CHST3      | 1003.64861 | 1.02313226 | 0.00177946 | 0.02469544 |
| SNORA53    | 774.029449 | -1.3365489 | 0.0017942  | 0.02487747 |
| C9orf3     | 708.341618 | 1.02281799 | 0.0018032  | 0.02495728 |
| TRAK1      | 1623.48065 | 1.08405707 | 0.00180176 | 0.02495728 |
| DGKG       | 37.536995  | 1.70573493 | 0.00180827 | 0.0250049  |
| MMP16      | 981.938204 | 2.37744302 | 0.00181648 | 0.02509588 |
| FAM198A    | 3093.95957 | 1.5176649  | 0.00182854 | 0.02522002 |
| SERTAD4    | 126.676143 | 1.88168479 | 0.00182875 | 0.02522002 |
| LRRC37BP1  | 425.63242  | 0.68152019 | 0.00183954 | 0.025346   |
| CX3CR1     | 1354.54383 | 1.7822752  | 0.0018471  | 0.02540462 |
| LOC645434  | 10.7650456 | 2.05456366 | 0.00184707 | 0.02540462 |
| SUDS3      | 1235.22502 | -0.4789124 | 0.00185587 | 0.02550249 |
| LOC1001306 | 152.685402 | 1.59490899 | 0.00187182 | 0.02569861 |
| ASPA       | 96.9660532 | 2.31264768 | 0.00187373 | 0.02570194 |
| PIGB       | 346.864652 | -0.9378317 | 0.00188609 | 0.02583829 |
| POLRMT     | 610.530774 | -0.6588279 | 0.00188704 | 0.02583829 |
| MED29      | 1470.17342 | -0.7881036 | 0.00189036 | 0.02586067 |
| PCDHA8     | 44.8260866 | 2.33015456 | 0.00189846 | 0.02594837 |
| TFIP11     | 484.730838 | -0.7858709 | 0.00190221 | 0.02597652 |
| BMP2       | 99.4266874 | -1.8305145 | 0.00192219 | 0.02622298 |
| LUM        | 213.953677 | 2.46324605 | 0.00192367 | 0.02622298 |
| WARS2      | 361.536583 | 1.04839629 | 0.00192719 | 0.02624777 |
| F2RL1      | 137.038433 | -2.2882446 | 0.00193033 | 0.02625775 |
| SMG7       | 1807.45107 | -0.9966611 | 0.00193135 | 0.02625775 |
| NUBP1      | 271.306642 | 0.56558349 | 0.00193855 | 0.02633244 |
| THSD1      | 125.771946 | 1.23923999 | 0.00194866 | 0.02644632 |
| MYBPC1     | 8.60745392 | 2.63771571 | 0.00195368 | 0.02649106 |
| PRR14L     | 1960.5573  | -0.668001  | 0.00196157 | 0.02657461 |
| LCAT       | 216.499952 | 0.91639462 | 0.00200209 | 0.02709972 |
| TGFBR2     | 4434.69312 | 0.92881427 | 0.00200672 | 0.02713837 |
| GLRX2      | 58.7991202 | -1.0652653 | 0.00201937 | 0.02728542 |
| SNAI3-AS1  | 74.6683418 | 1.28097652 | 0.00202232 | 0.02730138 |
| JUNB       | 4860.31668 | -1.8825828 | 0.00202465 | 0.02730874 |
| ANP32A-IT1 | 128.116673 | 1.57407945 | 0.00203271 | 0.02731971 |
| GRIK2      | 44.1997464 | 2.1452981  | 0.0020283  | 0.02731971 |
| LINC00597  | 80.3606321 | 1.72245518 | 0.00203108 | 0.02731971 |
| NBR2       | 99.827054  | 1.12911242 | 0.00203435 | 0.02731971 |
| NUDT4      | 199.691984 | -1.5077331 | 0.00203301 | 0.02731971 |
| CDH6       | 589.051441 | 2.02866708 | 0.00203885 | 0.02735619 |
| SLC39A4    | 43.5847743 | -1.6924599 | 0.00204362 | 0.02739625 |
| PIK3CG     | 623.920631 | 1.41059055 | 0.00205516 | 0.0275269  |

|           |            |            |            |            |
|-----------|------------|------------|------------|------------|
| RDH16     | 8.40161798 | 2.30528012 | 0.00206768 | 0.02764645 |
| SLC26A5   | 9.56518186 | -2.6664941 | 0.00206733 | 0.02764645 |
| NDUFA3    | 597.143257 | -0.8448146 | 0.00207062 | 0.02766172 |
| SLC12A1   | 147.267009 | 2.43375192 | 0.00207665 | 0.02771814 |
| TMC6      | 691.022946 | -0.8456189 | 0.00208233 | 0.02776977 |
| NOC4L     | 158.082659 | -0.7410688 | 0.00208439 | 0.02777313 |
| ANK1      | 86.8498862 | -2.0693744 | 0.00208697 | 0.0277835  |
| FIGNL1    | 220.920114 | 1.06374463 | 0.00208988 | 0.02778489 |
| SNORA46   | 12.4002558 | 2.16244431 | 0.00209069 | 0.02778489 |
| NAA60     | 801.908462 | -0.7459324 | 0.00209369 | 0.02780062 |
| FRMD7     | 26.9549816 | 2.57835215 | 0.00209737 | 0.02782545 |
| CCDC170   | 150.710359 | 1.6453972  | 0.0021017  | 0.02785885 |
| EME1      | 21.1547248 | 1.48743528 | 0.00211278 | 0.0279575  |
| TOB1-AS1  | 20.6158435 | 1.6665956  | 0.00211221 | 0.0279575  |
| C8orf44   | 114.733302 | 1.15087219 | 0.00213244 | 0.02814777 |
| DEF8      | 946.412146 | 0.64970454 | 0.00213632 | 0.02814777 |
| KCNK5     | 246.646324 | 1.56299694 | 0.00213273 | 0.02814777 |
| RFT1      | 530.72553  | 0.54077775 | 0.00213408 | 0.02814777 |
| SERPINA3  | 966.704281 | -2.5018026 | 0.00213477 | 0.02814777 |
| GNB4      | 2547.69907 | 1.45517974 | 0.00214316 | 0.0281895  |
| VAV2      | 531.413803 | -0.8811246 | 0.00214269 | 0.0281895  |
| UBE2D3    | 4756.57677 | -0.6403991 | 0.00214819 | 0.02823154 |
| AQR       | 1636.8341  | -0.6146704 | 0.00216447 | 0.0283345  |
| FMN2      | 52.3346632 | 2.14676338 | 0.00216438 | 0.0283345  |
| GLTSCR1   | 206.12884  | -1.3464774 | 0.00216187 | 0.0283345  |
| RASEF     | 156.407997 | -2.5060049 | 0.00216159 | 0.0283345  |
| TMEM130   | 263.267911 | 2.62767026 | 0.00216525 | 0.0283345  |
| SUSD4     | 68.500865  | -2.4996063 | 0.00217387 | 0.02842311 |
| MLH1      | 787.310091 | 0.65655728 | 0.00218455 | 0.02853842 |
| SPRY1     | 1389.03125 | 1.38204559 | 0.00219533 | 0.02864879 |
| ZFAS1     | 992.367458 | -1.1223857 | 0.00219672 | 0.02864879 |
| AASS      | 2299.40202 | 0.85059392 | 0.00220014 | 0.02866904 |
| FMO5      | 58.5665093 | 1.71109784 | 0.00220481 | 0.02870555 |
| PLCE1-AS1 | 11.2526362 | 2.40870032 | 0.00220678 | 0.02870678 |
| SSPN      | 1200.74157 | 1.9546392  | 0.00221341 | 0.02876876 |
| CYB561D2  | 185.482238 | 0.78714236 | 0.00222082 | 0.02882116 |
| MVB12B    | 871.773486 | 0.91885175 | 0.00222252 | 0.02882116 |
| SACS      | 2445.84281 | -1.0681295 | 0.00222307 | 0.02882116 |
| AES       | 7053.52727 | -0.6823209 | 0.00223101 | 0.02888621 |
| HEXDC     | 186.67317  | 0.84999933 | 0.00223185 | 0.02888621 |
| ZNF414    | 105.367721 | -1.0230056 | 0.00223635 | 0.0289201  |
| SLC30A3   | 56.8611321 | 2.57093413 | 0.00223836 | 0.02892174 |
| CHKA      | 944.112405 | 0.84378103 | 0.00224085 | 0.02892956 |
| MUC19     | 21.490604  | -2.1898332 | 0.00224439 | 0.02895091 |
| CARM1     | 722.227175 | -0.6702399 | 0.00225357 | 0.02902065 |
| NAB2      | 388.180718 | -1.3987572 | 0.00225328 | 0.02902065 |
| COBL      | 131.169822 | -2.4707455 | 0.00229089 | 0.02945179 |
| GTF2A2    | 647.870294 | -0.9246291 | 0.00228961 | 0.02945179 |
| NOTCH3    | 7360.07864 | 0.8715165  | 0.0022964  | 0.02949797 |
| PRKX      | 891.59412  | 0.73260301 | 0.00229844 | 0.02949958 |



|           |            |            |            |            |
|-----------|------------|------------|------------|------------|
| NCOA5     | 945.505977 | -0.8285477 | 0.00230039 | 0.02949987 |
| PTGES3    | 2947.71041 | -0.8554173 | 0.00231446 | 0.02965563 |
| MIDN      | 1686.75121 | -2.0868606 | 0.00232324 | 0.02974323 |
| IL2RB     | 38.6178735 | 1.64213066 | 0.00233894 | 0.02991939 |
| SPAG9     | 11053.9516 | 0.52079278 | 0.00234177 | 0.02993068 |
| MAGEE2    | 10.0354803 | 2.3432663  | 0.00234399 | 0.02993408 |
| BAHD1     | 841.38072  | -0.7131264 | 0.00234762 | 0.02995553 |
| MORN4     | 129.596338 | 0.84683513 | 0.00236005 | 0.03007499 |
| RGS7BP    | 231.11187  | 2.32013684 | 0.0023609  | 0.03007499 |
| ARL2BP    | 1392.31505 | 0.65509527 | 0.00236863 | 0.03014849 |
| KDM5D     | 567.106514 | -2.5433664 | 0.00238025 | 0.03027133 |
| FUK       | 403.96206  | 0.6878782  | 0.00238611 | 0.03029574 |
| LNx2      | 736.742975 | -0.8333505 | 0.00238586 | 0.03029574 |
| LRRN1     | 598.930697 | 2.29235601 | 0.00238893 | 0.03030645 |
| C19orf53  | 771.343773 | -0.8464022 | 0.00239219 | 0.03032279 |
| FGF2      | 1813.68146 | 1.2599169  | 0.00240577 | 0.03046983 |
| CA4       | 22.5898453 | -2.429281  | 0.00241068 | 0.03050679 |
| SLC9A8    | 653.453598 | -0.5596605 | 0.00241704 | 0.03054519 |
| TAF1C     | 806.88931  | 0.69719018 | 0.00241769 | 0.03054519 |
| PAPPA     | 2284.29454 | 2.38633423 | 0.00242385 | 0.03058089 |
| SPTBN1    | 50663.927  | 0.8920119  | 0.00242615 | 0.03058089 |
| ZNF326    | 798.244245 | -0.6521044 | 0.00242649 | 0.03058089 |
| MTMR12    | 1733.79122 | -0.7140326 | 0.00243204 | 0.03062571 |
| MCAT      | 121.185324 | -1.0044616 | 0.00244502 | 0.03074288 |
| PDCD4     | 1528.6192  | 0.72600964 | 0.00244534 | 0.03074288 |
| TBK1      | 827.659151 | -0.4974481 | 0.00245103 | 0.03078921 |
| NXPH2     | 974.071519 | 2.59507224 | 0.00246774 | 0.03097371 |
| CEACAM21  | 35.6245493 | 1.59400706 | 0.00248571 | 0.03102186 |
| DUSP2     | 95.4746712 | -2.0833422 | 0.00248071 | 0.03102186 |
| GNG5      | 526.545085 | -1.0913574 | 0.0024782  | 0.03102186 |
| LAMA5     | 4826.57083 | -1.6444022 | 0.00247718 | 0.03102186 |
| MIF       | 1923.41238 | -1.9807522 | 0.00248171 | 0.03102186 |
| RNASE1    | 1415.55721 | -1.9303846 | 0.00247387 | 0.03102186 |
| SYT15     | 844.585675 | 2.16719439 | 0.00248457 | 0.03102186 |
| UGDH      | 880.043925 | -1.3028169 | 0.00248981 | 0.03104788 |
| MAPK1IP1L | 2655.83867 | -0.7297425 | 0.00249261 | 0.03105753 |
| ABI3      | 353.209479 | 1.33856676 | 0.0024994  | 0.03106706 |
| DDX6      | 5669.10851 | -0.3888884 | 0.00249739 | 0.03106706 |
| LOC642852 | 768.615377 | 0.7607117  | 0.00249944 | 0.03106706 |
| MT1E      | 104.058494 | 2.05301969 | 0.0025122  | 0.03120041 |
| POLM      | 447.883138 | 0.6814265  | 0.00251666 | 0.03123052 |
| SUPT7L    | 1247.09205 | 0.73430617 | 0.00252454 | 0.03130307 |
| CEP162    | 494.580211 | 0.69217534 | 0.00254058 | 0.03145124 |
| JAK2      | 2526.85435 | 1.50622381 | 0.00253924 | 0.03145124 |
| OCEL1     | 115.97854  | -0.8711741 | 0.00255199 | 0.03156702 |
| GPR155    | 531.358302 | 1.50440013 | 0.0025633  | 0.03166753 |
| INSIG2    | 1052.04531 | -1.0189911 | 0.00256424 | 0.03166753 |
| CCL20     | 22.7538508 | -2.6093252 | 0.00257665 | 0.03179523 |
| BTN3A3    | 510.573096 | 0.89182269 | 0.00259838 | 0.03203769 |
| GSTM5     | 448.33971  | 2.5923928  | 0.00260272 | 0.03206547 |

|            |            |            |            |            |
|------------|------------|------------|------------|------------|
| SNHG20     | 186.982338 | 1.17690237 | 0.00260505 | 0.0320684  |
| CCNI       | 4326.35966 | -0.557331  | 0.00260845 | 0.03208454 |
| RAB11A     | 4199.09482 | -1.1989353 | 0.00263512 | 0.03238665 |
| DMC1       | 16.5008516 | 1.96371232 | 0.00263805 | 0.0323968  |
| ALG2       | 777.328734 | -0.7219269 | 0.00264214 | 0.03242103 |
| BICD1      | 245.135584 | -1.529787  | 0.00265825 | 0.0325927  |
| ENTPD3     | 9.03316618 | 2.30684839 | 0.00266909 | 0.0326995  |
| FAM167B    | 30.8382027 | 1.8444988  | 0.00267673 | 0.03276701 |
| PGR        | 3606.56502 | -1.7714838 | 0.00269004 | 0.03290367 |
| BGN        | 5883.25621 | 1.36548259 | 0.0026986  | 0.03298214 |
| COL11A1    | 12340.7155 | 1.97090477 | 0.00270427 | 0.03302523 |
| LINC01176  | 44.2002676 | 1.74333216 | 0.00270983 | 0.03303331 |
| LOC1027248 | 535.344453 | 1.33393445 | 0.00271353 | 0.03303331 |
| LOC729737  | 134.676546 | -1.6641855 | 0.00271127 | 0.03303331 |
| RALGPS2    | 374.673748 | -1.9058734 | 0.00271297 | 0.03303331 |
| JADE3      | 307.683704 | -0.8659374 | 0.00271759 | 0.03305644 |
| TMEM129    | 1252.1664  | 1.01994766 | 0.00272554 | 0.03312691 |
| SNURF      | 16.4418519 | -1.4631744 | 0.00273022 | 0.03315763 |
| CCDC144A   | 116.57075  | -2.3105987 | 0.00273279 | 0.03316256 |
| KCNQ1      | 248.312115 | 1.18073202 | 0.00273953 | 0.03319194 |
| KIF3B      | 2836.25411 | -0.8047777 | 0.00273851 | 0.03319194 |
| FNDC1      | 900.611392 | 2.56224653 | 0.00274729 | 0.03323359 |
| WDR92      | 178.622588 | 0.74029363 | 0.00274717 | 0.03323359 |
| APOA1      | 66.3467802 | 2.5791763  | 0.00275578 | 0.03331    |
| GAPDH      | 24534.0633 | -1.1518988 | 0.00276705 | 0.03341487 |
| MAP4K1     | 85.0299023 | 1.46468406 | 0.00277058 | 0.03341487 |
| PPP1R16A   | 324.290483 | -0.8944872 | 0.00277098 | 0.03341487 |
| BTG3       | 486.121075 | -1.2905882 | 0.00278156 | 0.03351612 |
| BTN3A2     | 481.83345  | 1.09491261 | 0.00279872 | 0.0336965  |
| DSE        | 4423.60588 | 0.91690096 | 0.00280521 | 0.03374816 |
| TUBGCP3    | 755.627444 | -0.6428948 | 0.00282864 | 0.03400342 |
| MYEF2      | 1475.06915 | -0.8804644 | 0.00283548 | 0.03405905 |
| FRMD6      | 887.78893  | 1.21731073 | 0.00284063 | 0.03409416 |
| C10orf54   | 2039.32541 | 1.21429236 | 0.0028485  | 0.03414792 |
| FAM109B    | 270.541162 | 1.11331041 | 0.00284955 | 0.03414792 |
| EIF4EBP3   | 40.8949928 | -1.6640875 | 0.00285424 | 0.03417752 |
| SULT1C2    | 440.956961 | -1.2445951 | 0.00287226 | 0.03436648 |
| NEAT1      | 26477.3615 | -1.1033341 | 0.00287652 | 0.03439063 |
| EML5       | 259.327692 | -1.5475332 | 0.00288091 | 0.0344163  |
| AGPAT4-IT1 | 62.3842889 | 1.28980268 | 0.00288867 | 0.03448225 |
| NEB        | 1432.06959 | 1.76468415 | 0.00289947 | 0.03458423 |
| SNX29      | 2192.05013 | 1.03778345 | 0.00290722 | 0.03462783 |
| UBXN6      | 1803.1188  | -0.6486607 | 0.00290763 | 0.03462783 |
| MYLK3      | 21.1208848 | 2.19202006 | 0.00292284 | 0.03478204 |
| PPIF       | 509.854275 | -1.0524345 | 0.00292564 | 0.03478845 |
| FCHO1      | 126.653419 | 1.97147724 | 0.00293228 | 0.0348134  |
| TTL12      | 742.399067 | -1.2688766 | 0.00293058 | 0.0348134  |
| RASSF4     | 962.163056 | 0.95361511 | 0.0029357  | 0.03482712 |
| EXOSC4     | 138.639981 | -0.8180304 | 0.00294086 | 0.03486149 |
| CHRFAM7A   | 10.757253  | 2.20495847 | 0.00294555 | 0.03489011 |

|           |            |            |            |            |
|-----------|------------|------------|------------|------------|
| ABHD11    | 163.381071 | 1.07573867 | 0.00296258 | 0.03506486 |
| SNAPC1    | 218.756113 | -1.194794  | 0.00297417 | 0.03517489 |
| PTGER3    | 11.6815415 | 1.94352015 | 0.00297675 | 0.03517827 |
| SNORA52   | 43.6429687 | 1.46957672 | 0.00297915 | 0.03517961 |
| CTSLP2    | 9.61279122 | 2.54234644 | 0.00298805 | 0.03520354 |
| EIF1AY    | 121.447198 | -2.4805034 | 0.00298358 | 0.03520354 |
| PRDM4     | 1028.31715 | -1.057526  | 0.0029861  | 0.03520354 |
| CYP4F3    | 34.5207099 | -2.2653625 | 0.00299911 | 0.03530675 |
| CCDC141   | 42.995738  | 1.60572402 | 0.00301097 | 0.03541923 |
| DAAM2     | 1036.90317 | 1.81277993 | 0.00301747 | 0.03546853 |
| MIEN1     | 304.130226 | -0.957332  | 0.0030333  | 0.03562731 |
| LDLRAD2   | 31.7595682 | 2.53206727 | 0.00303894 | 0.03566631 |
| TMEM121   | 24.2332417 | 1.32999932 | 0.00307107 | 0.03601594 |
| NUFIP1    | 181.420972 | -0.727589  | 0.00307862 | 0.03607696 |
| A2M       | 11024.7866 | 0.89573135 | 0.00308284 | 0.03609885 |
| PIP4K2B   | 2921.8594  | 0.36258101 | 0.0030874  | 0.03612469 |
| CLPP      | 453.664694 | -0.8380521 | 0.00309401 | 0.03615087 |
| PLEKHA1   | 2007.76775 | 1.03603042 | 0.00309434 | 0.03615087 |
| C21orf67  | 30.0983617 | 1.42554482 | 0.00312416 | 0.03647152 |
| HIST3H2A  | 65.3431676 | -1.6478531 | 0.00313892 | 0.03661597 |
| DIS3      | 1958.53133 | -0.5323076 | 0.00314818 | 0.03669615 |
| FBN2      | 2639.3145  | 1.45454137 | 0.00316191 | 0.03679529 |
| GLTSCR2   | 2516.34579 | -0.8194435 | 0.00316252 | 0.03679529 |
| NSUN5P2   | 294.889188 | 1.16157321 | 0.00316387 | 0.03679529 |
| CLEC4A    | 87.044193  | 1.11546116 | 0.00317831 | 0.0369352  |
| SNORA23   | 254.191952 | -0.881863  | 0.00318111 | 0.03693988 |
| KIF1A     | 1425.01563 | 2.4816623  | 0.00318599 | 0.03696861 |
| LINC00265 | 310.145725 | 1.024333   | 0.00318997 | 0.03698676 |
| BCORL1    | 351.064566 | -1.0842495 | 0.00319848 | 0.03699771 |
| C15orf48  | 17.6294457 | -2.233204  | 0.00319415 | 0.03699771 |
| CYP2R1    | 97.6245406 | 1.28615095 | 0.00320295 | 0.03699771 |
| HACL1     | 421.115987 | 0.73933311 | 0.00319952 | 0.03699771 |
| RNF111    | 1241.47248 | -0.6789769 | 0.00320243 | 0.03699771 |
| AXIN2     | 298.52086  | 1.58466632 | 0.00320783 | 0.03701084 |
| MSS51     | 175.663225 | 1.16534565 | 0.00320891 | 0.03701084 |
| TAF4      | 332.186531 | -0.6672966 | 0.00321239 | 0.03702326 |
| GMDS      | 1749.98286 | -0.9330498 | 0.0032266  | 0.03715909 |
| CYP27C1   | 22.5397006 | 2.36411783 | 0.00323023 | 0.03717311 |
| SEMA3B    | 3159.17399 | 1.25545425 | 0.00324006 | 0.03725832 |
| COBLL1    | 1311.48329 | 1.7940981  | 0.00326388 | 0.03750409 |
| FMO4      | 192.744374 | 1.0512608  | 0.00327043 | 0.03755125 |
| MRPL57    | 673.107418 | -0.8105528 | 0.00327638 | 0.03756618 |
| PREX1     | 2361.47887 | 1.12201465 | 0.00327662 | 0.03756618 |
| EID2      | 189.668263 | -0.6672142 | 0.00328338 | 0.03761564 |
| EMC7      | 680.935883 | -0.8655107 | 0.00330531 | 0.03783866 |
| MST1      | 142.173869 | 1.44486958 | 0.00331338 | 0.03790276 |
| TAF11     | 439.261956 | 0.61535857 | 0.00331636 | 0.03790863 |
| ZNF276    | 868.383419 | 0.8890331  | 0.00331894 | 0.03790998 |
| DKC1      | 609.919891 | -0.612702  | 0.00332434 | 0.03794341 |
| RNASEK    | 265.270071 | -0.806703  | 0.00336946 | 0.03842987 |

|           |            |            |            |            |
|-----------|------------|------------|------------|------------|
| LRRC29    | 69.0018162 | 1.00884724 | 0.00337715 | 0.03848904 |
| PROX1     | 54.9220116 | -1.6996932 | 0.00339182 | 0.03862749 |
| LINC00997 | 128.553747 | 0.87417298 | 0.00339733 | 0.0386616  |
| NR4A3     | 508.131194 | -2.1661651 | 0.00341454 | 0.03882873 |
| PATL1     | 776.122212 | -0.8452867 | 0.00342346 | 0.0389013  |
| CHRNA6    | 22.3900668 | 1.96866726 | 0.00342735 | 0.03891673 |
| CLN5      | 1229.17779 | -0.5113156 | 0.00344631 | 0.03901674 |
| NME2      | 270.532226 | -1.118631  | 0.00344356 | 0.03901674 |
| PGM5      | 837.83776  | 1.69233032 | 0.0034457  | 0.03901674 |
| TFPT      | 217.878056 | -0.9476183 | 0.00344585 | 0.03901674 |
| GGT1      | 60.6529871 | -1.8597008 | 0.00345351 | 0.03904067 |
| NPR3      | 2402.14729 | 2.50674827 | 0.00345275 | 0.03904067 |
| AKAP10    | 1094.53949 | 0.40227115 | 0.00346824 | 0.03917833 |
| SBNO2     | 969.561077 | -1.4362144 | 0.00347373 | 0.03920196 |
| ZFC3H1    | 2498.31334 | -0.8514307 | 0.00347543 | 0.03920196 |
| ISYNA1    | 4591.78995 | -1.5332916 | 0.00348235 | 0.0392224  |
| TMEM200B  | 305.672651 | 1.13761154 | 0.00348035 | 0.0392224  |
| SIDT1     | 47.9918842 | 1.25581698 | 0.00350051 | 0.03936925 |
| WDPCP     | 237.527479 | 0.71915482 | 0.00349823 | 0.03936925 |
| ADD2      | 13.1277692 | 2.13667542 | 0.00351221 | 0.03943645 |
| RPL3      | 18145.76   | -1.0242033 | 0.00351419 | 0.03943645 |
| TMEM56-RV | 18.9787406 | 1.54373796 | 0.00351172 | 0.03943645 |
| HMGCR     | 1093.22807 | -1.3336381 | 0.00351743 | 0.03944404 |
| ABHD15    | 363.004441 | 0.8756708  | 0.00353313 | 0.03959112 |
| XPOT      | 1940.28243 | -0.7103625 | 0.00353686 | 0.03960409 |
| CDK2AP2   | 599.566306 | -0.8737238 | 0.00354667 | 0.03966218 |
| RECK      | 1530.12467 | 0.73368406 | 0.00354721 | 0.03966218 |
| RASA4     | 62.7350254 | 0.88012525 | 0.00355937 | 0.03976916 |
| ERBB4     | 336.871525 | 2.50175232 | 0.00358161 | 0.03996692 |
| PBLD      | 174.833086 | 0.84708747 | 0.00358227 | 0.03996692 |
| CLEC7A    | 1139.52455 | 1.68084247 | 0.00359211 | 0.04001852 |
| DDX54     | 996.520457 | -0.5097778 | 0.00359471 | 0.04001852 |
| ZNF385A   | 376.138354 | -1.0409636 | 0.00359062 | 0.04001852 |
| TPRA1     | 329.0878   | 0.72854209 | 0.00360165 | 0.04006677 |
| C22orf34  | 45.2551293 | 1.67187886 | 0.00360714 | 0.04009875 |
| CHAMP1    | 340.003827 | -0.8047356 | 0.00361037 | 0.04010563 |
| LINC00886 | 109.668642 | 1.72141406 | 0.00361378 | 0.04011452 |
| CREB3L1   | 184.528637 | -1.7096712 | 0.00362231 | 0.04017081 |
| IFI44L    | 495.007586 | 1.30292805 | 0.00362816 | 0.04017081 |
| ITGA3     | 749.287059 | -1.2804014 | 0.00363715 | 0.04017081 |
| PTCH2     | 70.1153311 | 1.65545912 | 0.0036357  | 0.04017081 |
| RFX3      | 697.808076 | 0.86147805 | 0.003633   | 0.04017081 |
| SEH1L     | 772.61833  | -0.9556692 | 0.00363668 | 0.04017081 |
| TMEM9B-AS | 81.6060258 | 1.54817593 | 0.00362435 | 0.04017081 |
| FAM78A    | 284.265062 | 1.54452995 | 0.00364839 | 0.04023707 |
| HTRA1     | 2845.45436 | 1.37921829 | 0.00364733 | 0.04023707 |
| CNPY3     | 1155.56227 | 0.81690497 | 0.00365782 | 0.04031208 |
| PAGR1     | 779.097538 | 0.8384417  | 0.00366621 | 0.04034971 |
| SLC25A26  | 241.52624  | 0.69556034 | 0.00366648 | 0.04034971 |
| LDLRAD4   | 2868.40546 | 1.06942442 | 0.0036723  | 0.04035588 |

|           |            |            |            |            |
|-----------|------------|------------|------------|------------|
| SRSF8     | 860.913683 | -0.5349742 | 0.00366975 | 0.04035588 |
| S100B     | 255.093471 | 2.48054249 | 0.00368005 | 0.04041219 |
| SYNE1     | 6761.84362 | 1.56281034 | 0.00368455 | 0.04043264 |
| ANKLE2    | 1667.88201 | -0.6429662 | 0.00370932 | 0.04067544 |
| SNORA4    | 17.5672618 | -1.2423123 | 0.003721   | 0.04077443 |
| ADAMTSL5  | 311.53754  | -2.2826709 | 0.00373241 | 0.04087029 |
| IMP3      | 765.416541 | -0.7221277 | 0.00374922 | 0.04099592 |
| PODNL1    | 62.6210242 | 2.22673689 | 0.00374701 | 0.04099592 |
| MSANTD2   | 245.666955 | 0.69601241 | 0.00376508 | 0.04114003 |
| KLHL41    | 41.1790719 | 1.27526374 | 0.003776   | 0.04123001 |
| KCNIP1    | 14.212397  | 2.17392464 | 0.0037911  | 0.04136551 |
| PWAR1     | 71.1655992 | -1.1726945 | 0.00379664 | 0.04139654 |
| LINC01278 | 230.480392 | -0.684067  | 0.003807   | 0.04148005 |
| ATP5E     | 901.628521 | -0.6872895 | 0.00381015 | 0.04148503 |
| LY75      | 69.8569402 | 1.45254289 | 0.00381865 | 0.04150446 |
| NTHL1     | 160.247309 | 1.31505721 | 0.00382004 | 0.04150446 |
| SOAT2     | 8.07960137 | -2.1340251 | 0.00381494 | 0.04150446 |
| EPRS      | 3131.76518 | -0.6996161 | 0.00385615 | 0.04186715 |
| ARNTL2    | 341.78845  | -1.523704  | 0.00387352 | 0.04187813 |
| ATRIP     | 148.757408 | 0.73467031 | 0.00386955 | 0.04187813 |
| PCDHA5    | 62.9617406 | 2.07760498 | 0.00387003 | 0.04187813 |
| SMOX      | 607.468264 | -1.0914964 | 0.00387083 | 0.04187813 |
| STEAP2    | 363.635776 | -1.8292168 | 0.00386184 | 0.04187813 |
| TMEM249   | 9.33933557 | 1.89645333 | 0.00386588 | 0.04187813 |
| TDG       | 442.454261 | -0.6628629 | 0.00388557 | 0.04197891 |
| ADAT2     | 194.505412 | 1.08118957 | 0.00389978 | 0.04210283 |
| L3MBTL4   | 466.955964 | -1.3594502 | 0.00391392 | 0.04219616 |
| TXNL4B    | 242.443092 | 1.44350597 | 0.00391361 | 0.04219616 |
| TARDBP    | 2376.10115 | -0.6563145 | 0.00392583 | 0.04229486 |
| CD63      | 7763.12171 | -0.9811484 | 0.00393437 | 0.0423566  |
| TSPO      | 368.72756  | 1.27304487 | 0.00393707 | 0.0423566  |
| BANF1     | 421.291428 | -0.9957828 | 0.00397914 | 0.04274991 |
| SEC22C    | 1303.6948  | 0.66662538 | 0.0039792  | 0.04274991 |
| TFB1M     | 151.371265 | 0.52684602 | 0.00398315 | 0.04276248 |
| AP3B2     | 72.2881313 | -2.0226753 | 0.00401203 | 0.04304249 |
| AKT1S1    | 534.860349 | -0.7892534 | 0.0040192  | 0.04304493 |
| HSPD1     | 3247.57027 | -0.7068148 | 0.00402066 | 0.04304493 |
| TK2       | 1836.74658 | 0.8350414  | 0.0040164  | 0.04304493 |
| BAG2      | 311.561156 | -1.1691903 | 0.00403648 | 0.04318412 |
| PLB1      | 237.616987 | 1.47173207 | 0.00404773 | 0.04327433 |
| GPD1L     | 1210.20225 | 1.4216505  | 0.00405738 | 0.04334741 |
| LRP5      | 1271.63977 | 1.35243465 | 0.00406992 | 0.04345114 |
| ZNF787    | 270.616451 | -0.595875  | 0.00407566 | 0.0434822  |
| EXOC2     | 834.897091 | 0.58776092 | 0.00408176 | 0.04350329 |
| LPCAT2    | 1025.88718 | 1.46986571 | 0.0040833  | 0.04350329 |
| ETF1      | 2367.16457 | -0.8969317 | 0.0040967  | 0.04361585 |
| CSE1L     | 2036.90037 | -0.8349835 | 0.00410362 | 0.04365923 |
| SF3B4     | 538.194434 | -0.8257873 | 0.00411027 | 0.04369966 |
| SMARCA2   | 4190.34138 | 0.66851549 | 0.00411867 | 0.04375869 |
| SPRYD7    | 236.913348 | -0.9671113 | 0.00412666 | 0.04378307 |

|            |            |            |            |            |
|------------|------------|------------|------------|------------|
| TAZ        | 291.307271 | 0.63490156 | 0.00412531 | 0.04378307 |
| DUOX2      | 80.4563664 | 2.34280424 | 0.00414889 | 0.04396349 |
| PRIMPOL    | 338.390164 | 0.7138067  | 0.00414939 | 0.04396349 |
| NPHP3-ACAD | 205.255879 | 0.93226007 | 0.0041631  | 0.04404803 |
| SMNDC1     | 521.374888 | -0.6424269 | 0.00416096 | 0.04404803 |
| COL6A2     | 23773.1427 | 1.01173033 | 0.0041763  | 0.0441573  |
| RNF126     | 280.708955 | -0.8583644 | 0.00418965 | 0.044268   |
| BACE1      | 1516.96102 | 0.75233009 | 0.00420358 | 0.04427422 |
| CYSTM1     | 816.169712 | -1.2067543 | 0.00419484 | 0.04427422 |
| SEC24B     | 1665.40519 | -0.431667  | 0.00420465 | 0.04427422 |
| SPECC1     | 785.760665 | 1.24752297 | 0.00419632 | 0.04427422 |
| TRIB3      | 87.2153927 | -1.7070157 | 0.00420061 | 0.04427422 |
| ELF4       | 655.485023 | -0.6386217 | 0.00421218 | 0.04429276 |
| LIF        | 75.4067912 | -1.7039243 | 0.00421023 | 0.04429276 |
| ZNF384     | 970.393564 | -0.5951447 | 0.00421987 | 0.04434332 |
| TFRC       | 3808.55352 | -1.6979353 | 0.00422555 | 0.04437257 |
| IPO7       | 3856.71136 | -0.489279  | 0.00424169 | 0.04451167 |
| PRSS12     | 21.0185288 | 2.28308138 | 0.00426337 | 0.04470867 |
| CEBPA-AS1  | 18.6475724 | 2.2550176  | 0.00429784 | 0.04502269 |
| LOC1005056 | 16.3490005 | 1.91734039 | 0.00430017 | 0.04502269 |
| TOMM40L    | 209.589683 | 0.82860163 | 0.00430211 | 0.04502269 |
| ARHGEF33   | 34.828765  | 1.39031013 | 0.00430787 | 0.04505227 |
| ABCC1      | 864.913499 | -1.4232937 | 0.00431098 | 0.04505409 |
| ATXN2      | 1540.02207 | -0.6299254 | 0.00431414 | 0.04505654 |
| HBA1       | 168.99997  | -2.002627  | 0.00432258 | 0.045114   |
| TMEM189    | 462.128107 | -1.1173413 | 0.00434733 | 0.04534147 |
| LOC1002722 | 21.8485916 | 1.36692879 | 0.00436305 | 0.04545857 |
| POLR2D     | 485.730441 | -0.456986  | 0.00436447 | 0.04545857 |
| KCTD9      | 807.634382 | -1.0784736 | 0.00437752 | 0.0455505  |
| MME        | 330.840528 | 2.1853328  | 0.00437923 | 0.0455505  |
| NSDHL      | 219.965161 | -1.0325212 | 0.00443829 | 0.04613362 |
| PSMA3      | 627.013997 | -0.7553206 | 0.00444323 | 0.04615366 |
| SUCLG2-AS1 | 88.8195429 | 1.49556731 | 0.00445037 | 0.0461935  |
| TRPC2      | 8.43493326 | 2.20632458 | 0.00445307 | 0.0461935  |
| CHODL      | 83.2223357 | -2.2103944 | 0.00446703 | 0.04629632 |
| SH3YL1     | 678.748378 | 0.96438275 | 0.00446901 | 0.04629632 |
| ZNFX1      | 3377.87384 | -0.5750269 | 0.0044732  | 0.04630845 |
| CD274      | 40.4797719 | -1.8932199 | 0.00448197 | 0.04634508 |
| FLNC       | 5960.55601 | -1.7212581 | 0.00448277 | 0.04634508 |
| GALNT5     | 81.1655502 | 2.29244925 | 0.00449224 | 0.04638058 |
| PRPF19     | 999.997067 | -1.0534254 | 0.00448969 | 0.04638058 |
| TCAP       | 10.4147918 | 1.80494836 | 0.00449862 | 0.04641522 |
| HIST1H2BD  | 595.216306 | -0.927806  | 0.00451493 | 0.04655224 |
| LOC1005060 | 26.8551045 | 1.806199   | 0.00452818 | 0.04665754 |
| PTPRH      | 32.3434457 | -2.4177288 | 0.00453841 | 0.0467316  |
| MFNG       | 231.208167 | 1.29774331 | 0.00455069 | 0.04682671 |
| EXOSC8     | 299.969157 | -0.4883218 | 0.00455375 | 0.04682683 |
| ANO7       | 31.810667  | -1.4312154 | 0.00455984 | 0.04685809 |
| CACNA2D2   | 608.652128 | 1.97659266 | 0.00458517 | 0.04705686 |
| FAM135A    | 924.014718 | 0.67461453 | 0.00458963 | 0.04705686 |

|            |            |            |            |            |
|------------|------------|------------|------------|------------|
| FIGNL2     | 20.9742092 | 2.15120985 | 0.00459041 | 0.04705686 |
| KMT2B      | 1434.14547 | -0.5486376 | 0.00459354 | 0.04705686 |
| KXD1       | 962.993582 | -0.4971066 | 0.0045945  | 0.04705686 |
| IRF5       | 421.383919 | 1.45364017 | 0.00462829 | 0.04730829 |
| KLF4       | 1721.57795 | -1.4022912 | 0.00462354 | 0.04730829 |
| SPRED2     | 821.713837 | 0.63901366 | 0.00462821 | 0.04730829 |
| NUDCD3     | 2093.1852  | 0.57505034 | 0.0046423  | 0.04741995 |
| TFAP2C     | 7.6003886  | -2.4265632 | 0.00465527 | 0.04752083 |
| CCDC106    | 221.489061 | -0.6257376 | 0.00467663 | 0.04765638 |
| MAD1L1     | 516.581002 | 0.95385913 | 0.00468174 | 0.04765638 |
| NBPF25P    | 51.105665  | 1.18095656 | 0.00468021 | 0.04765638 |
| SEZ6L      | 18.8336861 | 2.14236424 | 0.00468406 | 0.04765638 |
| SPATA5     | 576.914671 | 0.73228329 | 0.0046779  | 0.04765638 |
| FGD2       | 665.032595 | 1.53879883 | 0.00469439 | 0.0477299  |
| GOLGA6L4   | 13.878887  | 1.88268195 | 0.00470543 | 0.04781052 |
| PFDN2      | 199.39352  | -0.8746354 | 0.00471567 | 0.04787908 |
| ZNF22      | 430.991345 | 0.63479798 | 0.00471841 | 0.04787908 |
| NGRN       | 2147.27543 | -0.6632978 | 0.00474103 | 0.04807682 |
| DNAJA4     | 461.963553 | -1.3101654 | 0.00475212 | 0.04815756 |
| SDR16C5    | 55.9285003 | -2.4336986 | 0.00477164 | 0.04832352 |
| PTGES2     | 478.725272 | -0.7724978 | 0.00478096 | 0.0483563  |
| RNF146     | 1455.28828 | 0.66149803 | 0.00478118 | 0.0483563  |
| LRRC4      | 209.755607 | -1.4293095 | 0.00478814 | 0.04839483 |
| POU5F2     | 73.7166378 | 1.11159135 | 0.00480543 | 0.04853773 |
| RABL3      | 449.923354 | -0.5600102 | 0.00481803 | 0.04863303 |
| C1orf198   | 1981.53371 | 1.36570115 | 0.00482955 | 0.04871727 |
| ADAMTSL3   | 11346.8086 | 1.33378161 | 0.00483684 | 0.04875882 |
| USP51      | 253.518638 | -0.6990367 | 0.00485347 | 0.0488943  |
| GK         | 274.767826 | -1.3057542 | 0.00485706 | 0.04889846 |
| ANKMY1     | 183.647706 | 1.26971888 | 0.00486759 | 0.04890827 |
| LOC1019275 | 118.514229 | 0.89953683 | 0.00486675 | 0.04890827 |
| RPS21      | 2260.71272 | -0.9531145 | 0.00486731 | 0.04890827 |
| DRD2       | 76.020568  | 2.41637434 | 0.00487508 | 0.04895157 |
| ASCC2      | 586.700311 | -0.6699698 | 0.00491346 | 0.0490698  |
| COPS2      | 1624.32248 | -0.7564258 | 0.0049188  | 0.0490698  |
| DDX39A     | 406.437537 | -0.6300132 | 0.0049125  | 0.0490698  |
| GPR108     | 676.720148 | -0.6842188 | 0.00490566 | 0.0490698  |
| JUND       | 2663.23311 | -1.215925  | 0.00491874 | 0.0490698  |
| MORF4L1    | 5002.28688 | -0.7635909 | 0.00491237 | 0.0490698  |
| PROSC      | 894.391423 | -0.790867  | 0.00489158 | 0.0490698  |
| SETMAR     | 296.746333 | 0.67956345 | 0.0049081  | 0.0490698  |
| SNAP25     | 7.57294924 | -2.412649  | 0.00491794 | 0.0490698  |
| TBC1D12    | 716.652852 | 0.83285056 | 0.0048981  | 0.0490698  |
| RAP1GAP    | 119.121417 | -1.9770545 | 0.00492225 | 0.04907241 |
| PRORS1P    | 79.6076777 | 1.11038767 | 0.00493173 | 0.04913499 |
| CASP9      | 272.17402  | -1.0467894 | 0.00494747 | 0.04925988 |
| ABHD3      | 389.812588 | -1.5400805 | 0.00497017 | 0.04935081 |
| ATP11C     | 1021.63946 | -1.3605881 | 0.0049823  | 0.04935081 |
| EF5        | 751.993317 | 1.62185257 | 0.00497751 | 0.04935081 |
| FBXW4      | 604.714617 | -0.4727689 | 0.00497978 | 0.04935081 |

|            |            |            |            |            |
|------------|------------|------------|------------|------------|
| ILF3       | 4679.53799 | -0.4624052 | 0.00497863 | 0.04935081 |
| KATNAL2    | 184.777875 | 1.08345051 | 0.00497884 | 0.04935081 |
| SNTB2      | 2911.68422 | 1.08996591 | 0.00496356 | 0.04935081 |
| TUBGCP4    | 434.508139 | -0.7217065 | 0.00496759 | 0.04935081 |
| PGRMC2     | 857.411361 | -0.8960796 | 0.00499889 | 0.04948317 |
| LOC54944   | 82.3704147 | 1.19042269 | 0.00500348 | 0.04949677 |
| LINC00921  | 147.940769 | 1.05330492 | 0.00500723 | 0.04949893 |
| PCSK9      | 14.2954902 | -2.1346842 | 0.00501014 | 0.04949893 |
| ESR1       | 133.791613 | 1.72507809 | 0.0050161  | 0.04952592 |
| PIF1       | 18.0904565 | 1.95033385 | 0.00503058 | 0.04963696 |
| KIAA1407   | 214.123935 | 0.90404029 | 0.00507595 | 0.05002044 |
| MYOC       | 21.0768466 | 2.39737302 | 0.00507369 | 0.05002044 |
| ZSWIM1     | 309.665711 | -0.7910636 | 0.00507962 | 0.05002447 |
| PCK2       | 185.746518 | -1.0293677 | 0.00508563 | 0.05004825 |
| PRMT1      | 1207.6115  | -0.6893355 | 0.00508855 | 0.05004825 |
| EXOG       | 300.305399 | 0.82049064 | 0.00509339 | 0.05006384 |
| PRX        | 888.113092 | 1.58357682 | 0.0051008  | 0.05010464 |
| MANEA-AS1  | 66.2514296 | 1.07221063 | 0.00511903 | 0.0502194  |
| NOP2       | 506.598964 | -0.7834196 | 0.00511811 | 0.0502194  |
| AMICA1     | 202.23829  | 1.51204904 | 0.00512409 | 0.05023704 |
| CHST14     | 442.00275  | 0.77402327 | 0.00515124 | 0.05046315 |
| MYZAP      | 104.711389 | -2.1468688 | 0.00515372 | 0.05046315 |
| CNTNAP1    | 399.923518 | 1.26571066 | 0.00517312 | 0.05062079 |
| NIFK-AS1   | 125.226642 | 0.78418471 | 0.0051958  | 0.05081041 |
| PLEKHM3    | 1078.96716 | 0.60903747 | 0.0052222  | 0.05100356 |
| PUS1       | 155.094306 | -0.7572114 | 0.00522197 | 0.05100356 |
| RAB3A      | 38.5295575 | -1.033119  | 0.0052341  | 0.05108735 |
| DUSP18     | 151.335418 | -1.0659097 | 0.00524738 | 0.05118446 |
| RPGRIP1    | 21.2342004 | 1.91685198 | 0.00525122 | 0.05118942 |
| NBPF3      | 191.531176 | 1.41973751 | 0.00525696 | 0.05121283 |
| SERTAD2    | 651.63665  | 1.25307418 | 0.0052628  | 0.05123725 |
| GFPT2      | 913.193518 | -2.0144945 | 0.00526977 | 0.0512402  |
| WWC2-AS2   | 36.4797207 | 1.63994249 | 0.00526844 | 0.0512402  |
| COPZ1      | 2018.90799 | -0.6689963 | 0.00527972 | 0.05130448 |
| EMILIN3    | 282.382772 | 1.66600285 | 0.00528369 | 0.0513106  |
| SNHG17     | 104.338164 | -1.0333303 | 0.00528881 | 0.05132787 |
| FXR1       | 2337.41296 | -0.4515734 | 0.00530512 | 0.05142228 |
| PAK7       | 26.9370176 | 2.40677579 | 0.00530523 | 0.05142228 |
| RPS24      | 8948.84043 | -0.7393111 | 0.00532896 | 0.05161967 |
| SNORA57    | 413.070802 | 1.24474057 | 0.00533522 | 0.05164778 |
| RASAL3     | 182.950122 | 1.47872672 | 0.00534021 | 0.05166349 |
| PERP       | 2454.5767  | -1.514132  | 0.00535604 | 0.05178404 |
| LOC1019297 | 29.7956737 | 2.33888347 | 0.00537    | 0.0518537  |
| WVOX       | 413.075054 | 1.0181118  | 0.00536965 | 0.0518537  |
| ATP2B4     | 10472.8047 | -0.5719629 | 0.00540073 | 0.05192203 |
| CRIP1      | 252.917061 | -1.5950535 | 0.00539156 | 0.05192203 |
| FCGR1B     | 66.3665783 | 1.74343337 | 0.00539462 | 0.05192203 |
| LRRRC8C    | 2328.58739 | 0.92948767 | 0.0053982  | 0.05192203 |
| 7-Sep      | 4725.21259 | 0.72181406 | 0.00539324 | 0.05192203 |
| SNORA67    | 41.3997011 | -1.1327201 | 0.00539545 | 0.05192203 |



|           |            |            |            |            |
|-----------|------------|------------|------------|------------|
| TRIM45    | 274.794529 | 1.61311646 | 0.00539124 | 0.05192203 |
| LRRC37A3  | 440.010854 | 1.08334846 | 0.00540616 | 0.05194173 |
| LDHA      | 6155.82395 | -1.5205028 | 0.00541064 | 0.05194824 |
| SLC4A11   | 20.9424808 | 1.87415629 | 0.0054136  | 0.05194824 |
| SLBP      | 953.213651 | 0.88858789 | 0.00542063 | 0.05195077 |
| STOML3    | 19.6805618 | 2.27717339 | 0.00542006 | 0.05195077 |
| TRAF3IP3  | 109.229071 | 1.70640459 | 0.00542746 | 0.05198386 |
| LATS2     | 1630.90016 | -0.5884934 | 0.00544545 | 0.0521236  |
| SIGLEC11  | 129.526581 | 1.95359592 | 0.00545168 | 0.05215079 |
| ARF6      | 1262.29643 | -0.6723114 | 0.00545842 | 0.05218273 |
| SOBP      | 1050.17179 | -0.8192136 | 0.00546217 | 0.05218615 |
| EYA2      | 1741.98559 | -1.258822  | 0.00547011 | 0.05222954 |
| S100P     | 7.74589596 | -2.2647469 | 0.00547931 | 0.0522849  |
| SCG3      | 9.47792533 | -2.0631676 | 0.00549801 | 0.05243078 |
| CPXM2     | 3578.98004 | 2.07988864 | 0.00550898 | 0.05250278 |
| ZNF358    | 621.633613 | -0.4538321 | 0.00551517 | 0.05252921 |
| MLYCD     | 205.481454 | 0.68919755 | 0.00553146 | 0.05261911 |
| MTRNR2L3  | 10.8170388 | 1.80599175 | 0.00553125 | 0.05261911 |
| NFX1      | 1548.53448 | -0.3729    | 0.00554044 | 0.05263929 |
| TRAF5     | 2177.13821 | -1.3650539 | 0.0055382  | 0.05263929 |
| TPM4      | 9982.53535 | -1.155501  | 0.00556311 | 0.05279166 |
| WIPF2     | 1047.75443 | -0.601418  | 0.00556335 | 0.05279166 |
| MLST8     | 390.15046  | -0.6987792 | 0.00558499 | 0.05296431 |
| LTB4R     | 257.512496 | 0.80496163 | 0.00561261 | 0.05319341 |
| HIST2H2BF | 332.351609 | -0.9893516 | 0.0056231  | 0.05325994 |
| BYSL      | 147.4095   | -0.8004617 | 0.00563383 | 0.05329587 |
| TMEM106B  | 2398.71186 | 0.61822833 | 0.00563214 | 0.05329587 |
| GBP4      | 473.554439 | 1.04031069 | 0.00566444 | 0.05348667 |
| RBM7      | 451.266952 | -0.5877163 | 0.00566349 | 0.05348667 |
| TRG-AS1   | 20.2224238 | 1.78080901 | 0.00565978 | 0.05348667 |
| HIST1H2BG | 225.047871 | -1.2446802 | 0.0056777  | 0.05354606 |
| SMDT1     | 214.733376 | -0.9828367 | 0.00567515 | 0.05354606 |
| ALKBH5    | 2344.59298 | -0.5702067 | 0.00568913 | 0.05355518 |
| HMHA1     | 1172.00814 | 1.43150713 | 0.00568536 | 0.05355518 |
| PDLIM3    | 65.37204   | -2.3498282 | 0.00568788 | 0.05355518 |
| FKBP9P1   | 26.0738365 | 1.29584385 | 0.0056947  | 0.05357484 |
| LINC00987 | 46.5823733 | 1.91413452 | 0.00571075 | 0.05369291 |
| WSB2      | 1378.8081  | -0.9425419 | 0.00572698 | 0.05381259 |
| FBXO46    | 238.186363 | -0.8340805 | 0.00573547 | 0.05385941 |
| KLF2      | 3528.15281 | -1.5263096 | 0.005753   | 0.0539581  |
| SLC35E2B  | 1177.18222 | 0.96783405 | 0.00575043 | 0.0539581  |
| RPS5      | 4838.99549 | -0.6776026 | 0.00576297 | 0.05401861 |
| RMDN3     | 617.08848  | -0.5361272 | 0.00576857 | 0.0540381  |
| CNOT6     | 1093.36341 | -0.7001025 | 0.00577377 | 0.05403933 |
| HACE1     | 506.556143 | 0.69488713 | 0.00577573 | 0.05403933 |
| BRCA1     | 228.52391  | 1.08560142 | 0.00579223 | 0.05409483 |
| DUSP7     | 147.789695 | 1.31856731 | 0.00578878 | 0.05409483 |
| GPI       | 4457.97874 | -0.9191332 | 0.0057884  | 0.05409483 |
| FLI1      | 747.148109 | 1.07245473 | 0.00584709 | 0.054553   |
| SPATA9    | 10.5972607 | 2.22988883 | 0.00584839 | 0.054553   |

|            |            |            |            |            |
|------------|------------|------------|------------|------------|
| TAGLN2     | 2073.69851 | -1.6308281 | 0.00586482 | 0.05467306 |
| FBLL1      | 11.080242  | 1.98149134 | 0.0058724  | 0.05471052 |
| NDUFA12    | 495.598842 | -0.9423462 | 0.00587598 | 0.0547107  |
| COX7B      | 823.269229 | -0.7587049 | 0.00588087 | 0.0547231  |
| EXT1       | 3330.34304 | 1.44839709 | 0.00589148 | 0.05478861 |
| DCDC2      | 14.7736588 | -2.3422376 | 0.00589608 | 0.05479821 |
| FZD6       | 774.186672 | -1.0040606 | 0.00591812 | 0.05493657 |
| RSPO4      | 15.3483399 | 1.68906915 | 0.00591499 | 0.05493657 |
| SPINT1     | 157.07264  | -1.7526396 | 0.00592324 | 0.0549509  |
| PTPRG      | 3790.15635 | 1.17307659 | 0.00593435 | 0.0550208  |
| GOLGA8H    | 36.2222209 | 1.6806787  | 0.00594058 | 0.05504086 |
| IGSF9      | 42.7722313 | -1.7608637 | 0.00594726 | 0.05504086 |
| MXD1       | 343.625657 | -1.657027  | 0.00594375 | 0.05504086 |
| CILP2      | 133.149458 | 2.26242451 | 0.00596176 | 0.05514181 |
| PODXL2     | 342.028293 | 2.12893069 | 0.00598269 | 0.05529323 |
| STARD7-AS1 | 98.4038485 | 0.99472777 | 0.00598533 | 0.05529323 |
| MEST       | 5227.96506 | 2.00374498 | 0.00600748 | 0.05546448 |
| ABAT       | 495.83127  | 1.41716875 | 0.00603092 | 0.05554736 |
| GSN        | 34035.9455 | 0.8637443  | 0.00602824 | 0.05554736 |
| HSPH1      | 1937.1675  | -1.1506188 | 0.00602554 | 0.05554736 |
| OXCT1-AS1  | 18.2243302 | 1.8466691  | 0.00602669 | 0.05554736 |
| ADAT1      | 435.901932 | 0.71020176 | 0.0060659  | 0.05576662 |
| BACH2      | 260.627005 | 1.35783007 | 0.00607595 | 0.05576662 |
| ETV1       | 190.094043 | 1.87771985 | 0.00608013 | 0.05576662 |
| GZMH       | 14.7094119 | 2.03008981 | 0.00606386 | 0.05576662 |
| MED10      | 254.968107 | -1.1444386 | 0.006078   | 0.05576662 |
| MPPED1     | 184.714301 | -1.9503509 | 0.00606087 | 0.05576662 |
| ZNF480     | 661.346692 | -0.774435  | 0.00607639 | 0.05576662 |
| ROM1       | 49.1018086 | 1.53333339 | 0.00610593 | 0.05596978 |
| MSC        | 57.4764036 | 2.03685243 | 0.00611361 | 0.05597961 |
| PER3       | 1926.03401 | 1.31806953 | 0.00611429 | 0.05597961 |
| NPHP1      | 168.948689 | 0.65595056 | 0.00615204 | 0.05629174 |
| ZNF684     | 81.0366929 | 1.22905461 | 0.00616342 | 0.05636223 |
| SCRN2      | 471.902037 | 0.80345763 | 0.00616785 | 0.05636921 |
| ELOF1      | 454.820673 | -0.5234879 | 0.00618642 | 0.05650529 |
| NTN4       | 1046.25628 | 1.769466   | 0.00620026 | 0.05656452 |
| PRKG1      | 865.912566 | 1.85246837 | 0.00619937 | 0.05656452 |
| FOXC1      | 7271.62787 | -0.7606055 | 0.00620737 | 0.05659572 |
| TRIM11     | 417.473651 | -0.7886323 | 0.00621563 | 0.05663745 |
| CRHR1-IT1  | 31.5870508 | 1.41971432 | 0.00623243 | 0.05667495 |
| OLA1       | 1208.0769  | -0.7737675 | 0.00622667 | 0.05667495 |
| PSMD12     | 743.841274 | -0.7309243 | 0.0062345  | 0.05667495 |
| RNF24      | 553.635975 | -1.0721983 | 0.00622869 | 0.05667495 |
| PSMG3-AS1  | 264.726927 | 0.95576347 | 0.00624236 | 0.05671284 |
| COA1       | 549.90965  | 0.65763462 | 0.00624763 | 0.05672716 |
| AHCY       | 1541.36753 | -0.8173328 | 0.0062607  | 0.05681222 |
| MED14      | 1781.55149 | -0.6409135 | 0.00626917 | 0.05682228 |
| PITPNM1    | 816.010078 | -0.8933565 | 0.0062692  | 0.05682228 |
| ITGA9      | 706.015287 | 1.12365643 | 0.00627695 | 0.05685898 |
| CPEB2      | 1446.1123  | -1.5406269 | 0.00629988 | 0.05703299 |

|            |            |            |            |            |
|------------|------------|------------|------------|------------|
| ABHD2      | 5238.79053 | -1.1006704 | 0.00631989 | 0.05710748 |
| ARHGEF5    | 272.852536 | -1.2048539 | 0.0063241  | 0.05710748 |
| CTNNBIP1   | 532.668721 | 1.01315524 | 0.00631777 | 0.05710748 |
| ZFP36L2    | 4110.33204 | -0.61359   | 0.00631907 | 0.05710748 |
| ZNF25      | 725.74189  | 0.70189071 | 0.00632669 | 0.05710748 |
| GAMT       | 147.018926 | 1.29431793 | 0.00635446 | 0.05729086 |
| LINC00924  | 26.839918  | 2.13603408 | 0.00635444 | 0.05729086 |
| WDR1       | 3814.34217 | -0.6299205 | 0.00636342 | 0.05733795 |
| LILRA1     | 114.698399 | 1.65271218 | 0.00638569 | 0.05746022 |
| MON2       | 4322.31521 | -0.59166   | 0.00638821 | 0.05746022 |
| PDGFRL     | 536.862403 | 1.85651015 | 0.00638687 | 0.05746022 |
| MURC       | 12.441667  | 1.91868483 | 0.00641937 | 0.05770675 |
| MCF2L      | 585.354626 | 0.9842648  | 0.00642377 | 0.0577125  |
| DDIT3      | 279.576202 | -0.9847499 | 0.00645628 | 0.05792074 |
| EPDR1      | 680.336868 | 1.56314778 | 0.00645826 | 0.05792074 |
| IL18RAP    | 31.1864504 | -2.1387476 | 0.00645231 | 0.05792074 |
| ZDHHC12    | 128.534406 | -0.8368496 | 0.006464   | 0.05793842 |
| NBEAL1     | 2032.87816 | 0.3834086  | 0.00647103 | 0.0579417  |
| NDUFB9     | 490.590299 | -0.5530805 | 0.00647191 | 0.0579417  |
| EZR        | 3754.64909 | -1.1193297 | 0.00649062 | 0.05807537 |
| ANKK1      | 19.8563435 | 1.73026759 | 0.00649816 | 0.05810901 |
| CDK4       | 1158.6844  | -0.6434397 | 0.00651447 | 0.05819216 |
| SPAG8      | 79.956226  | 0.99907014 | 0.00651504 | 0.05819216 |
| MBLAC1     | 25.1858643 | 1.23922983 | 0.00652449 | 0.05824277 |
| TMEM200A   | 16.9610331 | 1.80814012 | 0.00655785 | 0.05850656 |
| FAM73B     | 409.053904 | 0.60805879 | 0.00658038 | 0.05867347 |
| SAMM50     | 397.921477 | -0.5834757 | 0.00663735 | 0.0591471  |
| FLJ31104   | 16.0476047 | 1.53308964 | 0.00664713 | 0.05919988 |
| LOC1005067 | 11.4941136 | 1.68173561 | 0.00666483 | 0.05932315 |
| AK5        | 22.3350981 | 2.26576041 | 0.00667436 | 0.05937361 |
| HYAL2      | 846.671491 | 0.99322128 | 0.00668522 | 0.05943576 |
| SCARNA2    | 6210.67929 | 0.96707866 | 0.00672466 | 0.05975186 |
| RYR3       | 257.441492 | 2.27464652 | 0.00673995 | 0.05981853 |
| SERPINB8   | 256.672309 | -1.6571425 | 0.00673681 | 0.05981853 |
| SPNS2      | 144.807339 | 1.23603041 | 0.0067511  | 0.05988284 |
| AGMAT      | 13.8389129 | 1.9561846  | 0.00676438 | 0.05995177 |
| NCK1-AS1   | 33.9057831 | 1.61558819 | 0.00676667 | 0.05995177 |
| MICU2      | 946.096201 | -0.7402513 | 0.00677234 | 0.05996739 |
| B3GAT1     | 19.5626417 | 2.23558024 | 0.00679854 | 0.06014674 |
| TXNRD3     | 371.833879 | 0.6660887  | 0.00680042 | 0.06014674 |
| UHMK1      | 4054.39965 | -0.4405359 | 0.00680981 | 0.06019515 |
| CD4        | 1628.28617 | 1.32762309 | 0.00683116 | 0.06027977 |
| TECPR1     | 887.768973 | 0.6961032  | 0.00682691 | 0.06027977 |
| UBE2D4     | 502.545497 | 0.77887832 | 0.00683064 | 0.06027977 |
| CASP10     | 407.237585 | 0.61954351 | 0.00684817 | 0.06036053 |
| LOC1005061 | 20.3046911 | 1.50413516 | 0.00684599 | 0.06036053 |
| MECR       | 258.4632   | 0.72791764 | 0.00687771 | 0.0605862  |
| LRRC16B    | 25.0619005 | 1.3419573  | 0.00688893 | 0.06065025 |
| ARHGDI     | 3201.94333 | -0.668803  | 0.00691101 | 0.06079006 |
| LETM2      | 29.8523789 | -1.0075349 | 0.0069246  | 0.06079006 |

|           |            |            |            |            |
|-----------|------------|------------|------------|------------|
| LINC01089 | 333.524185 | 0.77953793 | 0.00692441 | 0.06079006 |
| SRGAP2    | 1735.40579 | 1.01537806 | 0.0069201  | 0.06079006 |
| SRP68     | 1080.78229 | -0.8655293 | 0.00692221 | 0.06079006 |
| IRF2BPL   | 1062.76523 | -0.8414028 | 0.00693685 | 0.0608168  |
| PHTF2     | 811.943573 | 0.73673762 | 0.00693952 | 0.0608168  |
| TAS2R43   | 46.8945166 | 1.25770961 | 0.00693591 | 0.0608168  |
| PITPNM2   | 430.544934 | -0.8886033 | 0.00697158 | 0.06106294 |
| TOLLIP    | 863.766534 | -0.7899734 | 0.00698088 | 0.06107479 |
| TP53RK    | 641.687689 | -1.013827  | 0.00697866 | 0.06107479 |
| ADIRF     | 3759.95979 | 1.68713721 | 0.00703418 | 0.06150604 |
| COLGALT2  | 10.9106686 | 1.94996136 | 0.00704013 | 0.06152307 |
| GHR       | 1299.0121  | 1.14847061 | 0.00704971 | 0.06157177 |
| GATS      | 1424.40862 | 0.64008458 | 0.00706595 | 0.06167848 |
| TAPT1-AS1 | 169.636474 | 1.15485247 | 0.007078   | 0.06174861 |
| MYO18A    | 1638.97096 | 0.80806076 | 0.00708488 | 0.06177358 |
| CABLES2   | 195.688057 | -0.7352934 | 0.00713123 | 0.06214238 |
| SERINC2   | 107.28324  | -1.9427326 | 0.00713798 | 0.06216597 |
| ESF1      | 628.549147 | -0.5566083 | 0.00718524 | 0.0625073  |
| TLCD1     | 10.3497282 | -1.8555128 | 0.00718531 | 0.0625073  |
| C12orf49  | 419.527339 | -0.688104  | 0.0072094  | 0.06261049 |
| CDC37L1   | 369.211247 | -0.5691954 | 0.00720356 | 0.06261049 |
| TJP3      | 29.3103814 | -1.5976888 | 0.00720753 | 0.06261049 |
| C12orf73  | 73.4372231 | -1.0649642 | 0.00722328 | 0.06269558 |
| ARRDC2    | 1072.12634 | 1.5708803  | 0.00723063 | 0.06272395 |
| BOC       | 11113.5165 | 1.81491738 | 0.00725088 | 0.06279327 |
| CHD1L     | 680.583377 | 0.52085352 | 0.00725024 | 0.06279327 |
| SRSF10    | 140.595619 | 0.82017986 | 0.00725079 | 0.06279327 |
| CPOX      | 223.129005 | 0.70513735 | 0.00726255 | 0.06281193 |
| MTHFS     | 29.3821961 | -1.2565275 | 0.0072653  | 0.06281193 |
| NCF1C     | 25.7971583 | 1.55141004 | 0.00725969 | 0.06281193 |
| SH3BP4    | 1642.1337  | 1.6206421  | 0.00727603 | 0.06286935 |
| COL26A1   | 384.016502 | 2.10314801 | 0.00729216 | 0.06287821 |
| LSM12     | 292.038539 | -0.8405369 | 0.00728868 | 0.06287821 |
| RAD51D    | 178.60773  | 0.78669974 | 0.00728955 | 0.06287821 |
| RPL38     | 3447.95227 | -0.4821361 | 0.00729343 | 0.06287821 |
| ADH1B     | 26.5286855 | -1.9703748 | 0.0073148  | 0.06302264 |
| ADIPOR2   | 2040.47034 | -0.7335326 | 0.00732249 | 0.06302264 |
| XRN2      | 2153.06961 | -0.5653177 | 0.00731844 | 0.06302264 |
| SV2A      | 44.1864489 | 1.86844666 | 0.00733404 | 0.06308672 |
| PLD1      | 3092.83477 | 0.84481974 | 0.00734698 | 0.06309202 |
| SLMO2     | 882.455811 | -0.9412073 | 0.0073464  | 0.06309202 |
| SORCS2    | 822.57012  | 1.94340347 | 0.00734163 | 0.06309202 |
| CD27      | 7.7957634  | 1.92418216 | 0.00737802 | 0.06318325 |
| CTNND1    | 278.138919 | 0.51679977 | 0.00738307 | 0.06318325 |
| CYBB      | 4938.10071 | 1.40462726 | 0.00739007 | 0.06318325 |
| DCLK2     | 231.737116 | 1.16041198 | 0.00737963 | 0.06318325 |
| HNRNP3    | 1404.91045 | -0.6427833 | 0.00738917 | 0.06318325 |
| MPV17L2   | 140.114982 | -0.8459426 | 0.00738823 | 0.06318325 |
| NOX5      | 107.600461 | 2.1796257  | 0.0073905  | 0.06318325 |
| PRICKLE3  | 88.2219394 | -0.6711175 | 0.00736915 | 0.06318325 |

|            |            |            |            |            |
|------------|------------|------------|------------|------------|
| HIVEP3     | 722.855534 | 1.86532146 | 0.00739963 | 0.06322611 |
| HUWE1      | 12238.7401 | -0.4486838 | 0.00740723 | 0.06324559 |
| LSM10      | 133.172765 | -0.9496905 | 0.00741014 | 0.06324559 |
| CLIP2      | 473.556028 | 0.81549874 | 0.00744286 | 0.06348954 |
| TMTC2      | 54.5947022 | -1.3659803 | 0.00746408 | 0.06359992 |
| ZNF121     | 534.873851 | -0.4051375 | 0.00746274 | 0.06359992 |
| ZNF669     | 106.314061 | -0.7531012 | 0.00748319 | 0.06372741 |
| SMIM5      | 27.7284606 | 1.63584513 | 0.00749412 | 0.06378517 |
| R3HDM2     | 1775.1684  | -0.6330495 | 0.00750114 | 0.06380956 |
| POLA2      | 274.386463 | 0.61720191 | 0.00750828 | 0.0638349  |
| SLC25A28   | 480.668182 | -0.556711  | 0.00753047 | 0.06398818 |
| IL20RA     | 104.065319 | 2.12079863 | 0.007569   | 0.06425068 |
| ZNF10      | 748.984149 | -1.1500049 | 0.00756973 | 0.06425068 |
| IGFBP2     | 7059.60828 | 1.41312977 | 0.00758304 | 0.06432815 |
| UBE2S      | 180.095574 | -1.0833865 | 0.00758941 | 0.06434661 |
| ASPSCR1    | 343.047408 | 0.62286931 | 0.00759508 | 0.06435916 |
| STK17B     | 1044.85282 | 1.26036067 | 0.00760076 | 0.06437182 |
| RAB13      | 720.126362 | -0.8574646 | 0.00760869 | 0.06440348 |
| VPS33A     | 480.236178 | -0.8368431 | 0.00761633 | 0.06443268 |
| GLG1       | 11866.4483 | 0.67005036 | 0.00762418 | 0.06446356 |
| SNORA61    | 11.0725563 | 1.66148981 | 0.00764631 | 0.0646151  |
| MMGT1      | 1105.88396 | -0.5987064 | 0.00765844 | 0.06464646 |
| PCDHGB4    | 368.694987 | -0.9565322 | 0.00765843 | 0.06464646 |
| FRMD6-AS1  | 29.4816387 | 1.22633427 | 0.00770937 | 0.06490064 |
| LOC1005059 | 12.4639537 | 1.76856245 | 0.00769407 | 0.06490064 |
| RAPH1      | 1477.30909 | 0.8711342  | 0.00770002 | 0.06490064 |
| SHROOM3    | 634.078267 | 1.98127505 | 0.00770967 | 0.06490064 |
| VAC14-AS1  | 68.4376204 | 2.20355525 | 0.00770882 | 0.06490064 |
| ZNF730     | 91.5774868 | -1.436863  | 0.00773427 | 0.06507204 |
| BNIP3      | 382.471684 | -1.407517  | 0.00776275 | 0.06524021 |
| GPR133     | 1563.15874 | 2.02167081 | 0.00776228 | 0.06524021 |
| TTLL3      | 324.672825 | 0.95891928 | 0.00776884 | 0.06525567 |
| ICA1       | 115.718893 | 1.35876553 | 0.007796   | 0.06544804 |
| DOCK9      | 4787.93503 | 0.97142341 | 0.0078117  | 0.06554402 |
| MAP2K5     | 402.377008 | -0.7040252 | 0.00781708 | 0.06555334 |
| USE1       | 206.902131 | -0.7429111 | 0.00782697 | 0.06560053 |
| TNFSF8     | 240.131628 | 1.4122632  | 0.00783127 | 0.06560073 |
| TRAP1      | 852.620819 | -0.6931946 | 0.00783619 | 0.06560622 |
| CSTF1      | 599.726686 | -0.7788793 | 0.00784259 | 0.06562405 |
| TRMT112    | 1121.3565  | -0.5825469 | 0.00785495 | 0.06565592 |
| UBE3A      | 2583.90617 | -0.4669294 | 0.00785364 | 0.06565592 |
| IER2       | 863.165094 | -1.5134806 | 0.00789771 | 0.06595175 |
| LOC148413  | 202.808861 | 0.8526193  | 0.00789893 | 0.06595175 |
| SPTLC3     | 8255.60719 | -1.7586843 | 0.00790376 | 0.06595623 |
| GSTM4      | 288.805546 | 1.19610045 | 0.00792069 | 0.06606163 |
| DMTN       | 500.802834 | -1.7351257 | 0.00798053 | 0.06632648 |
| EIF2B2     | 377.381999 | -0.587895  | 0.0079811  | 0.06632648 |
| LINC00574  | 29.0388719 | 1.94267768 | 0.00797289 | 0.06632648 |
| NUDT19     | 240.27041  | -0.5004712 | 0.00797592 | 0.06632648 |
| SSX2IP     | 506.087801 | -1.2279517 | 0.00797591 | 0.06632648 |

|             |            |            |            |            |
|-------------|------------|------------|------------|------------|
| TNFRSF12A   | 220.165073 | -1.9473642 | 0.00796549 | 0.06632648 |
| UCP2        | 329.207594 | -1.159234  | 0.00798266 | 0.06632648 |
| FOXF2       | 19.9680528 | 2.03923557 | 0.00798715 | 0.06632785 |
| ATP1B3      | 1822.01232 | -1.1686768 | 0.00802033 | 0.06656747 |
| TPPP        | 226.629199 | -1.7950416 | 0.00803043 | 0.06661532 |
| GLYR1       | 1762.29186 | -0.5004085 | 0.00805    | 0.06674161 |
| CRBN        | 870.317965 | 0.6176827  | 0.0080596  | 0.06678517 |
| KLF6        | 5417.8722  | -0.8833639 | 0.00807419 | 0.06684706 |
| SELPLG      | 725.757249 | 1.40830304 | 0.00807578 | 0.06684706 |
| GOPC        | 1357.97961 | 0.57097761 | 0.00808504 | 0.06685171 |
| NDUFB7      | 886.834614 | -0.7556038 | 0.00808191 | 0.06685171 |
| M1AP        | 14.6149004 | 1.64672265 | 0.00813201 | 0.06720389 |
| PPP6R1      | 1191.42577 | -0.6437353 | 0.00813688 | 0.06720803 |
| RHPN2       | 274.223033 | -1.8035016 | 0.00814372 | 0.0672284  |
| UBE2A       | 979.359293 | -0.8139187 | 0.0081537  | 0.06727461 |
| ABI3BP      | 8614.5548  | 1.87934653 | 0.00816544 | 0.06733526 |
| PDLIM2      | 801.183813 | 1.38716047 | 0.0081789  | 0.06741008 |
| ADAM20P1    | 141.191103 | -0.8601814 | 0.00818796 | 0.06744859 |
| WDR11-AS1   | 13.8614301 | 1.83939513 | 0.00819993 | 0.06751097 |
| ABHD14A     | 188.86038  | 1.17470391 | 0.0082625  | 0.06789308 |
| EIF5AL1     | 8.47456302 | -1.6338665 | 0.00826699 | 0.06789308 |
| GPR153      | 63.233811  | -1.3973248 | 0.00825246 | 0.06789308 |
| OSBPL3      | 539.264774 | 1.07921273 | 0.00827285 | 0.06789308 |
| RIPK2       | 278.009988 | -0.8026875 | 0.00827183 | 0.06789308 |
| TRIB1       | 675.908156 | -1.5716538 | 0.00825756 | 0.06789308 |
| DKFZP586I14 | 460.445177 | 1.12758755 | 0.00828062 | 0.06791099 |
| TIMM50      | 466.137783 | -0.6350487 | 0.00828388 | 0.06791099 |
| FAM208A     | 3531.87339 | 0.50064451 | 0.0083109  | 0.06805992 |
| ZFAND5      | 5739.64132 | 1.00927036 | 0.00831047 | 0.06805992 |
| RDH10       | 756.488735 | -1.7183095 | 0.0083491  | 0.0683363  |
| VMO1        | 75.9393112 | 1.65181775 | 0.00836481 | 0.06840499 |
| WDFY4       | 851.345962 | 1.3586931  | 0.0083664  | 0.06840499 |
| DPM1        | 429.490835 | -0.7262715 | 0.00840441 | 0.06867923 |
| CORIN       | 57.4719522 | 2.07669011 | 0.00841677 | 0.06870717 |
| GSTM3       | 1273.74312 | 1.83534267 | 0.00841451 | 0.06870717 |
| PRR7        | 12.1501755 | -1.4299817 | 0.00842284 | 0.06872017 |
| GIMAP6      | 585.166965 | 1.1895216  | 0.0084305  | 0.06874619 |
| DAAM1       | 804.613945 | -1.136564  | 0.00843927 | 0.0687812  |
| CCDC107     | 220.476268 | -0.5807312 | 0.00846058 | 0.06891831 |
| RNF10       | 2305.71036 | -0.4929873 | 0.0084739  | 0.0689902  |
| AUTS2       | 1006.03029 | 1.24280433 | 0.00848028 | 0.06899549 |
| EDC3        | 618.821809 | -0.5241197 | 0.00848802 | 0.06899549 |
| ZMYND15     | 175.588981 | 1.38258949 | 0.00848451 | 0.06899549 |
| EXO5        | 114.386721 | 0.77318936 | 0.00850303 | 0.06906938 |
| GORASP1     | 849.635114 | 0.51364057 | 0.0085061  | 0.06906938 |
| MFSD11      | 554.465914 | 0.62734648 | 0.00852542 | 0.06918969 |
| BZRAP1-AS1  | 24.8855349 | 1.48533827 | 0.00853469 | 0.0692283  |
| CCDC110     | 16.3140832 | 1.42820072 | 0.00854574 | 0.06926044 |
| MYOCD       | 21.8451903 | 2.12575001 | 0.00854767 | 0.06926044 |
| FGFR2       | 1292.57862 | -1.7229866 | 0.00856767 | 0.06934939 |

|           |            |            |            |            |
|-----------|------------|------------|------------|------------|
| PKIB      | 131.224848 | 1.5769596  | 0.00856506 | 0.06934939 |
| TNC       | 1267.60577 | 2.19974053 | 0.00857855 | 0.06940088 |
| STK32A    | 493.495778 | 2.12100871 | 0.00860102 | 0.06954605 |
| MGAT4A    | 2165.30472 | 1.01776079 | 0.00861802 | 0.06964686 |
| FAM120C   | 890.91617  | -0.5846444 | 0.00863265 | 0.06972839 |
| RGS9      | 22.7276753 | 1.61329407 | 0.00865117 | 0.0698413  |
| BCL2L11   | 429.231012 | -1.1229747 | 0.00866869 | 0.06994591 |
| MORC2-AS1 | 7.45298089 | -1.8220587 | 0.00868222 | 0.07001838 |
| IER5L     | 192.522488 | -1.6919382 | 0.00870923 | 0.07016251 |
| PLEKHG4   | 363.305239 | 1.31250603 | 0.00870669 | 0.07016251 |
| ARF3      | 3421.39134 | -0.7182598 | 0.00872897 | 0.0702479  |
| SHOC2     | 1528.05745 | -0.4028552 | 0.00872754 | 0.0702479  |
| ABCG2     | 2347.84575 | 1.62355872 | 0.00876274 | 0.07037604 |
| KLF10     | 954.730266 | -1.4360508 | 0.0087678  | 0.07037604 |
| MUC1      | 197.51254  | -1.1735379 | 0.00876276 | 0.07037604 |
| PLEKHO1   | 626.337192 | 0.92719896 | 0.00876607 | 0.07037604 |
| PPM1F     | 947.836107 | 0.44605834 | 0.00876655 | 0.07037604 |
| PIP4K2C   | 794.454507 | -0.5797377 | 0.00878999 | 0.0705173  |
| MMS22L    | 394.180242 | 1.03772529 | 0.0087971  | 0.07053746 |
| SNORA5A   | 13.0989972 | 1.42483809 | 0.0088044  | 0.07055919 |
| CCDC126   | 417.714998 | 1.2229236  | 0.0088208  | 0.07061697 |
| TCERG1    | 1821.70129 | -0.5131537 | 0.00881853 | 0.07061697 |
| PHYHIP    | 39.45624   | -2.2308314 | 0.00882987 | 0.07065279 |
| DYNC2H1   | 2220.88265 | 0.64436302 | 0.00885761 | 0.07083779 |
| PPP1R12C  | 1537.53938 | -0.908578  | 0.00886317 | 0.07084538 |
| EI24      | 1191.47307 | -0.4242771 | 0.00887195 | 0.07087871 |
| DPP3      | 450.023904 | -0.656549  | 0.0088995  | 0.07106188 |
| IL17RE    | 103.604426 | 2.06295339 | 0.00890784 | 0.07109154 |
| FCGBP     | 13309.0031 | 1.60690829 | 0.00892092 | 0.07115894 |
| CHPF2     | 1844.74838 | 0.76841101 | 0.00893417 | 0.07122763 |
| GNB1L     | 48.3760629 | -0.9420377 | 0.00895878 | 0.07138683 |
| ABHD14B   | 781.600865 | 0.5853844  | 0.0089732  | 0.07145073 |
| HIST1H2AB | 55.9553943 | 1.15641291 | 0.00897611 | 0.07145073 |
| RASD1     | 176.955029 | 2.00831235 | 0.00898131 | 0.07145514 |
| PDCL3     | 203.786746 | -0.955786  | 0.00902998 | 0.07180519 |
| HSPA5     | 7314.67382 | -1.303964  | 0.00904919 | 0.0718888  |
| PDGFRA    | 205.392105 | 2.16547375 | 0.00905454 | 0.0718888  |
| PHYHD1    | 157.583198 | 1.24764913 | 0.00905413 | 0.0718888  |
| PTP4A2    | 3226.84788 | -0.704154  | 0.00906842 | 0.07196188 |
| CCT8      | 2282.15214 | -1.0036805 | 0.00907951 | 0.07201262 |
| NMB       | 109.31017  | -1.0868209 | 0.00909005 | 0.07205905 |
| TMEM230   | 2519.72454 | -0.7512751 | 0.00912777 | 0.07228345 |
| USH1C     | 300.662788 | -2.1684176 | 0.00912757 | 0.07228345 |
| PTBP1     | 2999.19156 | -0.3721825 | 0.00913649 | 0.07231526 |
| PIN4      | 236.624737 | -0.7418978 | 0.00916728 | 0.07250738 |
| TLE1      | 380.438331 | 1.20454552 | 0.0091702  | 0.07250738 |
| IPW       | 608.988149 | -0.8046759 | 0.00918607 | 0.07255259 |
| ITGB5     | 2291.28917 | 1.0765388  | 0.00918125 | 0.07255259 |
| PCDHGA8   | 450.429286 | -0.9195288 | 0.00919009 | 0.07255259 |
| CYP2B7P   | 12.1955835 | 1.84375963 | 0.00919588 | 0.07256104 |

|            |            |            |            |            |
|------------|------------|------------|------------|------------|
| C18orf21   | 194.684383 | -0.6465737 | 0.00920467 | 0.07259307 |
| BATF3      | 24.4471352 | 1.48836305 | 0.00924088 | 0.07284124 |
| UBR2       | 2826.24153 | 0.43129018 | 0.00926827 | 0.07301974 |
| ELF3       | 24.3104731 | -1.9276697 | 0.00928223 | 0.07309223 |
| NUDT11     | 53.8892802 | 1.64932348 | 0.00930864 | 0.07323422 |
| PITRM1-AS1 | 24.7323494 | -1.7024562 | 0.0093098  | 0.07323422 |
| RPLP0      | 16651.1451 | -0.9123955 | 0.00931588 | 0.07324456 |
| CRYGS      | 26.0362381 | 1.43476244 | 0.00932457 | 0.07327537 |
| RRM1       | 785.594222 | -0.493554  | 0.00935826 | 0.07350251 |
| ACSBG2     | 34.7856684 | 2.20638795 | 0.00936866 | 0.07354662 |
| NAPA       | 1340.13479 | -0.5837446 | 0.00937547 | 0.07356252 |
| C17orf89   | 166.395062 | -0.7555288 | 0.00941333 | 0.07382182 |
| TET3       | 1388.07738 | 0.58459026 | 0.0094184  | 0.07382393 |
| LRG1       | 11.0903406 | -1.9057267 | 0.00946805 | 0.07413745 |
| TIMM10     | 176.021198 | -0.6140807 | 0.00946724 | 0.07413745 |
| CTGF       | 29240.038  | 1.77305823 | 0.00948921 | 0.07426526 |
| DCTD       | 961.302125 | 0.45411668 | 0.00949577 | 0.07427581 |
| LOC730102  | 164.40765  | 0.98230644 | 0.00950023 | 0.07427581 |
| LOC1019276 | 17.1893707 | 2.22724771 | 0.00951563 | 0.074342   |
| LOC642846  | 211.292025 | 1.27192927 | 0.00951837 | 0.074342   |
| LOC1019280 | 105.479101 | 1.13344916 | 0.00953391 | 0.07442556 |
| ANKRD20A5  | 292.642858 | 2.14910169 | 0.00954336 | 0.07444666 |
| GLP2R      | 119.017227 | 2.23541123 | 0.00954631 | 0.07444666 |
| C19orf47   | 213.412892 | -0.6758564 | 0.00955576 | 0.07448255 |
| TNNC1      | 1434.93952 | 2.00321136 | 0.00958417 | 0.07466612 |
| ADRBK2     | 685.189931 | 0.97336151 | 0.00959878 | 0.0747083  |
| COPS6      | 845.753744 | -0.7121558 | 0.00959931 | 0.0747083  |
| C2orf44    | 214.667813 | 0.56028939 | 0.00960421 | 0.07470861 |
| COPZ2      | 1547.46558 | 1.13437015 | 0.00961378 | 0.07474519 |
| MAPK13     | 124.449061 | -1.3098361 | 0.00962817 | 0.07481922 |
| CSF1R      | 4792.8147  | 1.12513789 | 0.0096355  | 0.07483716 |
| NBPF1      | 1849.49724 | 1.20044721 | 0.00964022 | 0.07483716 |
| DHX9       | 3967.50242 | -0.5474721 | 0.00965955 | 0.07487373 |
| LOC1001328 | 228.449664 | 1.72970888 | 0.00965603 | 0.07487373 |
| TRPS1      | 1656.79154 | 0.97588446 | 0.00965736 | 0.07487373 |
| RSRP1      | 1287.04825 | 0.85255051 | 0.00966481 | 0.07487667 |
| ZCCHC2     | 505.507437 | -1.2631822 | 0.00967431 | 0.07491249 |
| CNTRL      | 1281.15673 | 1.19604675 | 0.00971551 | 0.0751748  |
| HGF        | 206.770217 | 1.66742069 | 0.00971797 | 0.0751748  |
| CCDC9      | 395.367642 | -0.6074914 | 0.00975334 | 0.07530916 |
| FXVD6      | 774.625818 | -1.8407192 | 0.00974884 | 0.07530916 |
| HMG1       | 2075.59088 | -0.6085259 | 0.00975108 | 0.07530916 |
| MAPK3      | 819.29063  | -0.8345902 | 0.00975495 | 0.07530916 |
| LOC729683  | 32.3884052 | 1.29470743 | 0.00983065 | 0.0758183  |
| TUFT1      | 229.194848 | -1.1068637 | 0.0098357  | 0.0758183  |
| YWHAZ      | 8186.4971  | -0.8161692 | 0.0098345  | 0.0758183  |
| XPO7       | 1958.01973 | -0.7139926 | 0.0098444  | 0.07584729 |
| FAM120A    | 4716.95777 | -0.4829917 | 0.0098572  | 0.07590788 |
| GRIN3A     | 7.98485296 | 2.17027165 | 0.00987243 | 0.07598708 |
| SLC39A13   | 978.733426 | 0.5668914  | 0.00990058 | 0.07616552 |



|            |            |            |            |            |
|------------|------------|------------|------------|------------|
| LAMA2      | 1161.97241 | 1.67260818 | 0.00990905 | 0.07619255 |
| UBALD1     | 168.673047 | -1.0363535 | 0.00992273 | 0.0762596  |
| MRPS35     | 544.792212 | -0.5728002 | 0.00993177 | 0.07629093 |
| NDUFS6     | 395.316076 | -0.7661136 | 0.00994946 | 0.07638856 |
| GVINP1     | 315.86407  | 0.85564677 | 0.00997025 | 0.07647174 |
| PSTPIP1    | 106.765793 | 1.70406107 | 0.00996804 | 0.07647174 |
| MRPL42P5   | 8.5364222  | -1.408739  | 0.00999016 | 0.07658626 |
| TLL2       | 40.7624096 | -1.9182298 | 0.01001401 | 0.07673082 |
| LGALS3BP   | 8979.79081 | 1.0168013  | 0.01003033 | 0.07681754 |
| LOC1019272 | 7.538106   | 2.22287448 | 0.01003555 | 0.07681925 |
| CRISPLD1   | 195.870434 | 1.53510351 | 0.01005218 | 0.07685091 |
| FAM106CP   | 11.0478267 | -2.2255862 | 0.01006971 | 0.07685091 |
| PA2G4P4    | 155.597915 | 1.58299366 | 0.0100624  | 0.07685091 |
| PCOLCE2    | 300.082692 | 1.80394997 | 0.01006111 | 0.07685091 |
| PLEKHG5    | 638.278767 | 1.39525173 | 0.0100651  | 0.07685091 |
| SNRPB2     | 716.785996 | -0.7125274 | 0.01005518 | 0.07685091 |
| BRD7       | 1018.84323 | 0.64676254 | 0.01009611 | 0.07699451 |
| MRE11A     | 922.537943 | 0.63562381 | 0.01009854 | 0.07699451 |
| FBF1       | 416.282767 | 1.10675131 | 0.01011275 | 0.07706461 |
| APLN       | 104.909337 | -2.0735965 | 0.01014036 | 0.07712195 |
| C3orf62    | 176.454726 | 0.97738588 | 0.01013674 | 0.07712195 |
| SLC25A5    | 1620.39647 | -0.6099555 | 0.01013779 | 0.07712195 |
| USP35      | 250.749761 | 0.67938316 | 0.01013873 | 0.07712195 |
| WDR4       | 227.411392 | -0.6471639 | 0.01017032 | 0.07731152 |
| CA13       | 79.1582145 | 1.81524665 | 0.01019251 | 0.07742688 |
| FXYD5      | 2308.23454 | 1.33786045 | 0.01020445 | 0.07742688 |
| LRRC24     | 39.1666255 | 1.05133243 | 0.01020636 | 0.07742688 |
| SLC12A6    | 1747.88086 | -0.895897  | 0.0102061  | 0.07742688 |
| TMED2      | 4177.50256 | -0.8144747 | 0.01021069 | 0.07742688 |
| CCDC94     | 269.192415 | -0.4632054 | 0.01025818 | 0.07766748 |
| HPCAL4     | 105.387743 | 2.0673437  | 0.01026264 | 0.07766748 |
| MFAP4      | 1615.57849 | 1.61916923 | 0.01025319 | 0.07766748 |
| USP53      | 8674.43168 | 0.69321291 | 0.01026146 | 0.07766748 |
| USP19      | 1529.99852 | 0.6872562  | 0.01027937 | 0.07775576 |
| SCAMP3     | 800.813212 | -0.7418379 | 0.01029352 | 0.0778245  |
| LINC01004  | 1889.19714 | 0.89314914 | 0.01033917 | 0.07813119 |
| TWF1       | 1433.45757 | -0.7414539 | 0.01036173 | 0.07826313 |
| LY86       | 187.258619 | 1.11458171 | 0.01037642 | 0.07833559 |
| AEN        | 927.031334 | -0.8849041 | 0.01039528 | 0.0783663  |
| APBB2      | 7303.77704 | 0.91611942 | 0.01041619 | 0.0783663  |
| KSR2       | 15.4158506 | 2.10893726 | 0.01039345 | 0.0783663  |
| SLC9A9     | 789.520906 | 1.31532227 | 0.01040887 | 0.0783663  |
| TNFAIP3    | 2568.28527 | -1.2373684 | 0.0104079  | 0.0783663  |
| TTC31      | 506.905955 | 0.56524609 | 0.01039747 | 0.0783663  |
| USP47      | 2721.63689 | -0.3950933 | 0.01041319 | 0.0783663  |
| HMGCS1     | 900.230015 | -1.0870752 | 0.01042449 | 0.07839034 |
| LGR6       | 16.4692208 | -1.8961528 | 0.01044739 | 0.07852412 |
| EDEM2      | 452.859519 | -0.4535732 | 0.01046285 | 0.07860183 |
| CDC37      | 2159.73443 | -0.6693254 | 0.01050061 | 0.07884694 |
| ZNF621     | 1481.80059 | 0.56677989 | 0.01051545 | 0.07891983 |

|            |            |            |            |            |
|------------|------------|------------|------------|------------|
| GOLPH3     | 1883.87943 | -0.6402983 | 0.01053625 | 0.07899088 |
| KCTD18     | 357.170337 | 0.52862132 | 0.01053414 | 0.07899088 |
| SLC25A45   | 260.649489 | 1.28324634 | 0.01054362 | 0.07899088 |
| SLC29A2    | 8.74885183 | 1.93483039 | 0.01054549 | 0.07899088 |
| LOC1019273 | 44.1568067 | 1.3639894  | 0.01056472 | 0.07905786 |
| PUS10      | 162.07259  | 0.76294008 | 0.01056039 | 0.07905786 |
| SLC16A7    | 114.722437 | -1.5138463 | 0.01058619 | 0.07917993 |
| ANKRD52    | 1715.84866 | -0.8387521 | 0.01062619 | 0.0794018  |
| LGMIN      | 1101.51156 | -0.6696233 | 0.0106211  | 0.0794018  |
| ST7        | 562.864051 | -0.6781433 | 0.01063519 | 0.07943046 |
| LINC01011  | 42.4934814 | 1.55395596 | 0.01065076 | 0.07943765 |
| MFSD7      | 86.0782421 | 1.15258906 | 0.01065167 | 0.07943765 |
| RTKN       | 303.043696 | 0.82653677 | 0.01064406 | 0.07943765 |
| VAPB       | 2235.12563 | -0.8163227 | 0.01070048 | 0.07976293 |
| TSC22D1    | 14388.8061 | -1.3686087 | 0.01071664 | 0.07984472 |
| ZSWIM7     | 187.541293 | 0.78890634 | 0.01073602 | 0.0799503  |
| TP53BP2    | 1222.53973 | -0.8074188 | 0.01074476 | 0.07997659 |
| TUBB2A     | 225.197346 | 0.7430645  | 0.01076842 | 0.08011389 |
| RUSC1-AS1  | 65.2266463 | 1.02257776 | 0.0108081  | 0.08037017 |
| MRPL51     | 718.000253 | -0.6584857 | 0.01082835 | 0.08048183 |
| FLYWCH1    | 991.307237 | -0.4697722 | 0.01084541 | 0.08053452 |
| PPFIA2     | 89.6981074 | 2.07269869 | 0.01084592 | 0.08053452 |
| ARHGEF35   | 56.0961588 | -1.2782036 | 0.01086649 | 0.08064087 |
| LAMTOR1    | 900.461166 | -0.6690914 | 0.01087074 | 0.08064087 |
| MAP3K11    | 744.72854  | -0.6887674 | 0.0108822  | 0.08068069 |
| MYLK-AS1   | 22.6225481 | 1.52600335 | 0.01088662 | 0.08068069 |
| LOC1001336 | 8.29975271 | 2.04975469 | 0.01090874 | 0.08074495 |
| LPHN2      | 1827.85925 | 1.67806256 | 0.01091105 | 0.08074495 |
| MTERF      | 304.736524 | 0.53118603 | 0.01090729 | 0.08074495 |
| OSMR       | 1571.47352 | -1.018425  | 0.01092946 | 0.08076444 |
| OTUB1      | 705.416723 | -0.5312181 | 0.01092682 | 0.08076444 |
| UST        | 1555.74884 | 1.01141241 | 0.01092792 | 0.08076444 |
| LINC00925  | 53.193842  | -2.0248828 | 0.01093916 | 0.0807973  |
| UBE2B      | 1051.56531 | -1.0836225 | 0.01095103 | 0.08084604 |
| CCDC85C    | 580.904476 | -0.7943237 | 0.01097555 | 0.08098819 |
| COL16A1    | 3156.95697 | 1.2672934  | 0.0109898  | 0.08105442 |
| LEPR       | 39697.8685 | 1.8634587  | 0.01100006 | 0.08109116 |
| AGBL1      | 8.17003753 | -2.1915483 | 0.01103117 | 0.08128147 |
| CD9        | 4953.48172 | -1.1247512 | 0.01103892 | 0.08129958 |
| LOC1005071 | 27.404959  | 1.59968802 | 0.01106139 | 0.08142606 |
| HIST1H1A   | 21.5826669 | 2.14733008 | 0.01108306 | 0.08154646 |
| ARIH1      | 2245.46319 | -0.6668105 | 0.0111065  | 0.08166654 |
| CCT6P1     | 80.7171221 | 0.7403263  | 0.01111001 | 0.08166654 |
| AK3        | 2762.21064 | -0.8668782 | 0.01111623 | 0.08167318 |
| CA3        | 200.702776 | 2.15902257 | 0.01113843 | 0.08179721 |
| TMEM134    | 158.726788 | -0.6534052 | 0.01114939 | 0.08183858 |
| CCDC64     | 17.9862912 | -1.5456823 | 0.01115587 | 0.08184698 |
| PLXNC1     | 7517.41721 | -1.4538436 | 0.0111616  | 0.08184994 |
| ZNF280B    | 43.860952  | 1.25196015 | 0.01118907 | 0.08201224 |
| GIMAP8     | 575.085061 | 1.18340517 | 0.01120783 | 0.0821106  |

|            |            |            |            |            |
|------------|------------|------------|------------|------------|
| TSEN54     | 133.781897 | 0.74102233 | 0.01121662 | 0.08213581 |
| SMAD4      | 3558.15404 | -0.4278095 | 0.01126486 | 0.08244973 |
| NME9       | 11.7170292 | 2.11347499 | 0.01127976 | 0.0825142  |
| POU2F2     | 161.246444 | 1.42606573 | 0.01128978 | 0.0825142  |
| TNFRSF1A   | 2119.02661 | -0.5942522 | 0.01128644 | 0.0825142  |
| LOC1001333 | 50.5127273 | 1.05044832 | 0.01132916 | 0.08276269 |
| NUP93      | 862.819383 | 1.15987996 | 0.0113429  | 0.08282369 |
| WBP2       | 1255.03733 | -0.7929956 | 0.01135879 | 0.08290029 |
| NIN        | 2011.85083 | 0.52141616 | 0.01136458 | 0.08290316 |
| CTSF       | 2402.81408 | 1.52112559 | 0.01137071 | 0.08290848 |
| FAM102B    | 768.073484 | 0.82063776 | 0.01138429 | 0.08296814 |
| GSPT1      | 3459.8283  | -0.4573285 | 0.01143293 | 0.08328316 |
| AIFM1      | 469.849115 | -0.7409933 | 0.01145607 | 0.08337261 |
| PIWIL4     | 79.829072  | 0.76033099 | 0.01145148 | 0.08337261 |
| GIMAP4     | 685.793544 | 0.97827728 | 0.01146353 | 0.08338742 |
| SNORA72    | 10.0270442 | 1.82668242 | 0.01151001 | 0.0836859  |
| ERVK13-1   | 1473.22412 | 0.62531761 | 0.01152292 | 0.08374009 |
| AMPD3      | 630.619579 | -0.616751  | 0.01153253 | 0.08375    |
| BLCAP      | 2168.26861 | -1.1844943 | 0.01154063 | 0.08375    |
| C17orf62   | 828.678965 | 0.5901094  | 0.01153653 | 0.08375    |
| CTNNB1     | 11377.7415 | 0.5688304  | 0.01158012 | 0.08399685 |
| TP53INP2   | 978.361523 | -1.0219246 | 0.01159161 | 0.08404051 |
| ANK3       | 1248.82988 | 1.8047666  | 0.01161637 | 0.08418033 |
| AGPS       | 1410.30085 | 1.11768524 | 0.01164259 | 0.08425111 |
| CYP4B1     | 715.09119  | 1.72813212 | 0.01164133 | 0.08425111 |
| DHX38      | 1345.26257 | 0.66752792 | 0.0116377  | 0.08425111 |
| GNAO1      | 48.82836   | 1.80652355 | 0.01166537 | 0.08436625 |
| PTPN3      | 306.577474 | 1.71365402 | 0.01166948 | 0.08436625 |
| MGC12916   | 71.115532  | 1.60335472 | 0.0117161  | 0.08466346 |
| TSNAXIP1   | 69.0586404 | 1.11096723 | 0.01172616 | 0.08469631 |
| ARPC5L     | 203.428083 | -0.6430936 | 0.01173794 | 0.08470169 |
| MST1P2     | 19.5424044 | 1.80811423 | 0.01173402 | 0.08470169 |
| PRICKLE2   | 877.575193 | 1.114655   | 0.01175699 | 0.08479938 |
| CROCCP3    | 469.901858 | 1.03061761 | 0.01177728 | 0.08484602 |
| IQCH-AS1   | 233.44847  | 0.87185825 | 0.01177707 | 0.08484602 |
| MRPS12     | 198.315599 | -0.5174547 | 0.01178478 | 0.08484602 |
| POMP       | 784.951265 | -0.8218135 | 0.01179107 | 0.08484602 |
| RRN3P2     | 156.849791 | 1.64856363 | 0.0117907  | 0.08484602 |
| ZFP69B     | 38.8783425 | 1.20952777 | 0.01179708 | 0.08484948 |
| KLKB1      | 51.5619803 | 1.92583915 | 0.01182339 | 0.08499894 |
| ANKRD33B   | 2674.18333 | -1.2765883 | 0.01184965 | 0.08514789 |
| SDF2L1     | 134.677156 | -1.5081266 | 0.01186205 | 0.08519712 |
| OLFML1     | 3090.54923 | 1.65436313 | 0.01188696 | 0.08533618 |
| SIGLEC16   | 24.2645024 | 1.95018173 | 0.0118931  | 0.08534037 |
| SCNN1A     | 200.111516 | -1.8863573 | 0.01191417 | 0.0854516  |
| RGS12      | 441.940423 | 0.67016681 | 0.01193459 | 0.08551823 |
| RPL36A     | 694.359893 | 0.4455443  | 0.01193267 | 0.08551823 |
| ZFYVE20    | 1313.95963 | 0.51330526 | 0.01194143 | 0.08552738 |
| PPP2R2A    | 1106.16221 | -0.9367403 | 0.01195956 | 0.08560943 |
| TMBIM4     | 1467.7521  | -0.4024935 | 0.01196403 | 0.08560943 |

|            |            |            |            |            |
|------------|------------|------------|------------|------------|
| FAM66C     | 164.214065 | 1.28351863 | 0.01199847 | 0.08581585 |
| MICALL1    | 683.835819 | -0.969235  | 0.01201486 | 0.085862   |
| ZBTB8A     | 433.600878 | 1.12257807 | 0.0120161  | 0.085862   |
| DLEU2L     | 53.8957355 | 1.08202942 | 0.01203194 | 0.08592475 |
| SYDE2      | 320.155263 | 1.23910636 | 0.01203606 | 0.08592475 |
| MEG8       | 18.2397408 | 2.04495475 | 0.01205477 | 0.0860183  |
| GPD1       | 15.6764621 | -1.5257106 | 0.01209621 | 0.08622905 |
| HAAO       | 154.742686 | 1.21126899 | 0.0120955  | 0.08622905 |
| POLR2E     | 1221.57508 | -0.575877  | 0.01210114 | 0.08622905 |
| ANKAR      | 392.243931 | 0.91042612 | 0.01213796 | 0.08645128 |
| PCDHGB6    | 352.791659 | -0.9231206 | 0.01216471 | 0.08656158 |
| ZFAND6     | 1145.37637 | -0.7311297 | 0.01216001 | 0.08656158 |
| BORA       | 95.7490588 | -0.858972  | 0.01217093 | 0.08656572 |
| ZXDB       | 494.603176 | -0.589579  | 0.01220811 | 0.08679003 |
| ADRA2C     | 11.5340166 | 2.00407218 | 0.01224067 | 0.08697006 |
| LOC1019287 | 15.6533694 | 1.94674934 | 0.01224476 | 0.08697006 |
| DCUN1D2    | 386.485311 | -0.8753964 | 0.01225617 | 0.08698461 |
| NISCH      | 7703.39504 | 1.11589587 | 0.01226379 | 0.08698461 |
| POLR3K     | 91.3711705 | -0.6557407 | 0.0122602  | 0.08698461 |
| CC2D2B     | 18.2479119 | 1.34870788 | 0.01227828 | 0.08704719 |
| ACTB       | 46107.4743 | -0.5134931 | 0.0123292  | 0.08736783 |
| RBBP8      | 224.52344  | -1.1408577 | 0.01234797 | 0.08746048 |
| PCED1B     | 87.6950483 | 1.17631792 | 0.01237363 | 0.08756152 |
| TUBB3      | 91.4782777 | -1.9705648 | 0.01236829 | 0.08756152 |
| GATA6      | 124.846916 | 1.99321873 | 0.01238199 | 0.08758033 |
| EIF4ENIF1  | 518.538129 | -0.8658233 | 0.01242742 | 0.08786124 |
| DLG3       | 779.808457 | -1.073398  | 0.01244704 | 0.08795947 |
| AKR1E2     | 20.8283005 | 1.6689944  | 0.01245544 | 0.08797839 |
| INHA       | 36.7614782 | 1.48172804 | 0.01246346 | 0.08799453 |
| NTN1       | 2780.96135 | 1.45737621 | 0.01247337 | 0.08802406 |
| TTC9       | 236.113772 | -1.3700688 | 0.01249582 | 0.08814199 |
| C11orf21   | 29.9027709 | 1.60621092 | 0.01251679 | 0.08824939 |
| BAIAP2L1   | 64.9057238 | -1.9949339 | 0.01254323 | 0.08835472 |
| TPGS1      | 62.1179234 | -0.6391963 | 0.0125432  | 0.08835472 |
| RAB5B      | 3766.39688 | -0.7233766 | 0.01256487 | 0.08842609 |
| WARS       | 1134.08013 | -0.7903092 | 0.01256291 | 0.08842609 |
| LRRTM2     | 40.667254  | 1.35685995 | 0.01260552 | 0.08867153 |
| STRAP      | 1386.86214 | -0.7164289 | 0.01264682 | 0.08892133 |
| HIF1AN     | 1571.10543 | -0.4959442 | 0.0126546  | 0.08892776 |
| ZNHIT2     | 83.2112235 | -0.816626  | 0.01265931 | 0.08892776 |
| CCDC15     | 59.1707065 | 1.35384391 | 0.01267002 | 0.0889623  |
| HIPK3      | 6317.4852  | -0.4068309 | 0.01271034 | 0.08916393 |
| SMARCD2    | 1374.61133 | 1.00521244 | 0.01270862 | 0.08916393 |
| NANOS3     | 7.88082578 | 1.83248167 | 0.01272677 | 0.08922281 |
| ZNF493     | 1755.87981 | -0.9276973 | 0.01273035 | 0.08922281 |
| WLS        | 3145.602   | 1.0583769  | 0.01275245 | 0.08933694 |
| ALAS2      | 23.8985802 | 1.37490006 | 0.01277172 | 0.08936903 |
| BAG1       | 762.17339  | -0.5767134 | 0.01277448 | 0.08936903 |
| RNF135     | 577.454322 | 0.62743072 | 0.01276445 | 0.08936903 |
| LOC440300  | 228.284384 | 1.12076217 | 0.01278904 | 0.08943011 |

|          |            |            |            |            |
|----------|------------|------------|------------|------------|
| LCK      | 25.3099055 | 1.63343593 | 0.01279805 | 0.0894524  |
| ACTA1    | 12.4499255 | -1.7479328 | 0.01283234 | 0.08950076 |
| CARF     | 722.290507 | 0.67013402 | 0.01283409 | 0.08950076 |
| CDK5     | 80.7500806 | 0.84852581 | 0.01283329 | 0.08950076 |
| GRAMD2   | 7.75029244 | 2.10342388 | 0.01283266 | 0.08950076 |
| VRK3     | 530.504744 | -0.6658628 | 0.01282424 | 0.08950076 |
| TAC3     | 11.1270365 | -2.1511168 | 0.01285172 | 0.08958304 |
| ANXA2    | 21801.5297 | -0.9159774 | 0.0128743  | 0.08963354 |
| HSPBP1   | 284.946946 | -0.6102234 | 0.01287647 | 0.08963354 |
| JADE2    | 1686.74085 | -0.6202711 | 0.01287005 | 0.08963354 |
| NOD1     | 328.176075 | 0.95706637 | 0.01288658 | 0.08966329 |
| CALCRL   | 1559.60948 | 1.79455337 | 0.01289983 | 0.08967423 |
| XYLB     | 114.624916 | 0.95877346 | 0.01289506 | 0.08967423 |
| SRGAP2D  | 201.868732 | 0.89247886 | 0.012913   | 0.08972522 |
| HDDC3    | 129.016499 | 0.55557214 | 0.01293031 | 0.08976429 |
| PIGH     | 277.35287  | -0.5484607 | 0.01292672 | 0.08976429 |
| RPP25    | 57.3610275 | -1.6111925 | 0.01293717 | 0.08977134 |
| RNF125   | 335.71073  | 0.95694575 | 0.01298713 | 0.09007734 |
| ISCA2    | 213.149307 | -0.9617053 | 0.01300152 | 0.09013641 |
| SCARF1   | 304.125729 | 1.17046164 | 0.01301246 | 0.09017163 |
| COL22A1  | 122.903024 | 2.04693    | 0.01306161 | 0.09026788 |
| DNMT3B   | 24.6227202 | 1.3535831  | 0.01304581 | 0.09026788 |
| MSANTD1  | 9.12744994 | 1.76035689 | 0.01303374 | 0.09026788 |
| PRC1     | 324.666084 | -1.220675  | 0.0130606  | 0.09026788 |
| SPCS2    | 637.955961 | -0.6567004 | 0.01304898 | 0.09026788 |
| TXLNGY   | 211.082728 | -1.9989383 | 0.01305426 | 0.09026788 |
| HPS5     | 1529.46749 | 0.89898443 | 0.01307774 | 0.09030248 |
| IL20RB   | 27.5016225 | -1.2736452 | 0.01307837 | 0.09030248 |
| RPRD1B   | 1018.5957  | -0.4364319 | 0.01320727 | 0.09115149 |
| C11orf63 | 327.785641 | 1.43597033 | 0.01323277 | 0.09120995 |
| CCR2     | 55.9959789 | 1.68657571 | 0.01323084 | 0.09120995 |
| MIEF1    | 980.577958 | -0.7215146 | 0.01323355 | 0.09120995 |
| ADAM15   | 1363.21393 | 0.3689438  | 0.01325428 | 0.09128132 |
| CEBPD    | 3496.89097 | -1.1609285 | 0.01325579 | 0.09128132 |
| ACKR2    | 63.0838158 | 1.48618525 | 0.01328647 | 0.09132886 |
| MYOM2    | 58.4315623 | -1.3397811 | 0.01327367 | 0.09132886 |
| SOX8     | 11.9030025 | 1.66906978 | 0.01328546 | 0.09132886 |
| SSRP1    | 1591.02197 | -0.5186456 | 0.01327865 | 0.09132886 |
| PRKRIP1  | 30.5468273 | -0.9071841 | 0.01329523 | 0.09134822 |
| TTPAL    | 728.727823 | -0.7611834 | 0.01332343 | 0.09150106 |
| CSNK1G1  | 956.463879 | -0.5371808 | 0.01334103 | 0.09158096 |
| MOB2     | 286.880047 | 0.49066947 | 0.01336994 | 0.09173848 |
| DUS3L    | 287.419096 | -0.5995398 | 0.01340432 | 0.09185128 |
| LIMD2    | 315.987836 | 0.96953323 | 0.01339561 | 0.09185128 |
| TARS     | 1416.6938  | -0.8448602 | 0.01339842 | 0.09185128 |
| PDE7A    | 550.661263 | -0.9402008 | 0.01342473 | 0.09195011 |
| ZHX2     | 710.451805 | -0.6667506 | 0.01344714 | 0.09206258 |
| ARL8A    | 686.978067 | -0.7876863 | 0.0134769  | 0.09216188 |
| GLDC     | 113.638132 | 1.34333557 | 0.01348564 | 0.09216188 |
| PEBP4    | 7.48676337 | 1.82149003 | 0.01348426 | 0.09216188 |

|            |            |            |            |            |
|------------|------------|------------|------------|------------|
| RPUSD1     | 223.77928  | -0.7381874 | 0.01349164 | 0.09216188 |
| TDRD5      | 16.8341169 | -1.9148271 | 0.01347877 | 0.09216188 |
| FAM155A-IT | 33.7477966 | 1.64747647 | 0.0135059  | 0.09221825 |
| FAM179A    | 56.0749799 | 1.94281465 | 0.0135333  | 0.09232328 |
| INVS       | 750.58609  | 0.68397545 | 0.01353219 | 0.09232328 |
| TEX264     | 434.229037 | 0.6059701  | 0.01354468 | 0.09235991 |
| ACRBP      | 52.447134  | 1.19162126 | 0.01357781 | 0.09254477 |
| ERBB3      | 45.6968625 | -1.5267038 | 0.01359283 | 0.09260603 |
| CXCR6      | 34.0585697 | 1.47363083 | 0.01361624 | 0.09268337 |
| FAP        | 119.491631 | 1.94470741 | 0.01361298 | 0.09268337 |
| PAX2       | 30.4114573 | 2.13300185 | 0.01362598 | 0.09270856 |
| IMPA2      | 117.774648 | -0.9660414 | 0.0137059  | 0.09316982 |
| SLC10A3    | 502.913216 | -1.0039697 | 0.01370081 | 0.09316982 |
| ASB13      | 234.807771 | 0.71223059 | 0.01371602 | 0.09319735 |
| COX6B1     | 1385.55273 | -0.7302967 | 0.01376295 | 0.09343361 |
| CYSLTR2    | 24.8997499 | 1.4794409  | 0.01376215 | 0.09343361 |
| ZNF429     | 337.885104 | -0.6095791 | 0.01378253 | 0.09352517 |
| SULF1      | 9167.88048 | 1.74503943 | 0.01385683 | 0.09398783 |
| SAMD9L     | 2620.5053  | 0.62779906 | 0.01386881 | 0.0940276  |
| CBLN2      | 17.1366856 | 2.11873979 | 0.01388742 | 0.09407226 |
| ZC3H12A    | 129.094281 | -1.5575011 | 0.01388765 | 0.09407226 |
| RNF167     | 1024.35642 | -0.462398  | 0.01391011 | 0.09418289 |
| MSMO1      | 621.820118 | -1.2143866 | 0.01392169 | 0.09421978 |
| FAM222B    | 757.479503 | -1.1392406 | 0.01394026 | 0.09430396 |
| RASSF9     | 122.276869 | 1.43745201 | 0.01395479 | 0.09436065 |
| LMLN       | 278.776749 | 0.85246728 | 0.01396358 | 0.09436289 |
| LOC1001315 | 1110.80075 | 0.78764043 | 0.0139674  | 0.09436289 |
| HMGB2      | 909.140359 | -0.6546948 | 0.01397673 | 0.09438441 |
| HES1       | 1252.1155  | -1.3831132 | 0.01400409 | 0.09452762 |
| SSR4P1     | 43.2473923 | 1.44923888 | 0.01406867 | 0.09488812 |
| WDR18      | 255.540012 | -0.659385  | 0.01406985 | 0.09488812 |
| NPEPL1     | 55.38818   | -1.0829692 | 0.01409286 | 0.09500158 |
| SLITRK4    | 58.0844232 | 1.87064924 | 0.01410916 | 0.09506974 |
| LOC1019291 | 332.231321 | -1.1048953 | 0.0141261  | 0.09514217 |
| HNRNPU     | 10066.2382 | -0.492643  | 0.01413525 | 0.09516204 |
| C1orf159   | 76.5101019 | 1.18117511 | 0.01414766 | 0.09519173 |
| LINC00893  | 222.568307 | 0.7232719  | 0.01415823 | 0.09519173 |
| NCOA6      | 1661.3417  | -0.5873852 | 0.01415824 | 0.09519173 |
| AATF       | 636.446405 | -0.6897299 | 0.01417102 | 0.09520668 |
| VN1R1      | 125.802301 | -1.1057423 | 0.01417286 | 0.09520668 |
| CPEB1      | 60.2799211 | -1.6153324 | 0.0142083  | 0.09540303 |
| CPPED1     | 962.022313 | -1.2218205 | 0.0142257  | 0.09547814 |
| NECAP1     | 705.161736 | -0.4644584 | 0.01426602 | 0.09570695 |
| GMEB2      | 458.509627 | -0.7002756 | 0.01429208 | 0.09581209 |
| RFTN1      | 436.899241 | 1.35022421 | 0.01429417 | 0.09581209 |
| TNKS1BP1   | 2760.76764 | -0.7634318 | 0.01433083 | 0.09601592 |
| ITGB1BP2   | 27.0817955 | 1.54011991 | 0.01435044 | 0.0961054  |
| TRPM2      | 634.591586 | 1.21133763 | 0.01435939 | 0.09612341 |
| YIPF4      | 747.767067 | 0.63178676 | 0.01437119 | 0.09616057 |
| SEC23B     | 1287.54239 | -0.7388893 | 0.0143885  | 0.09623447 |

|            |            |            |            |            |
|------------|------------|------------|------------|------------|
| ARMC12     | 13.6935065 | 1.54347963 | 0.01443399 | 0.09649672 |
| TSPY26P    | 46.974596  | 0.97777477 | 0.01444733 | 0.09654388 |
| SMS        | 508.84413  | -0.7658577 | 0.01445988 | 0.09658569 |
| GAS1       | 5092.35674 | -1.2123916 | 0.01447145 | 0.09662098 |
| ENPP4      | 1341.46199 | -0.8251974 | 0.01448716 | 0.09662293 |
| GNAS-AS1   | 16.8325659 | 1.60592963 | 0.01450319 | 0.09662293 |
| SFRP1      | 3574.79057 | 2.05739227 | 0.01450251 | 0.09662293 |
| UHRF2      | 1652.16208 | 0.74824174 | 0.01449284 | 0.09662293 |
| ZNF215     | 32.3672383 | -1.6890568 | 0.01449449 | 0.09662293 |
| DSCR9      | 14.2750281 | -1.1384485 | 0.01456239 | 0.09697457 |
| GID8       | 1500.82094 | -0.7871855 | 0.01456859 | 0.09697457 |
| TMEM132A   | 216.08546  | 1.28063216 | 0.01459647 | 0.09711804 |
| CLEC18B    | 9.41556046 | 1.63821886 | 0.0146172  | 0.09721389 |
| EPN1       | 1288.96905 | -0.5382682 | 0.01462412 | 0.09721779 |
| ARMC5      | 232.198022 | 0.5164478  | 0.01468928 | 0.09760875 |
| C11orf84   | 240.080172 | -0.4447098 | 0.01470351 | 0.09766105 |
| KDM3A      | 1103.2275  | -0.8646169 | 0.01470996 | 0.09766168 |
| SNORA49    | 236.872897 | -0.9402892 | 0.0147183  | 0.09767482 |
| SERTAD4-AS | 22.825994  | 1.50104089 | 0.01474997 | 0.09784277 |
| C1orf233   | 205.518127 | 1.4585719  | 0.01477956 | 0.09792047 |
| TACC3      | 169.743739 | 0.67761934 | 0.01477451 | 0.09792047 |
| YY1        | 1242.93644 | -0.4409919 | 0.01478081 | 0.09792047 |
| DGCR6      | 64.4855137 | 1.77015542 | 0.01480738 | 0.09801195 |
| GATSL3     | 309.843265 | 1.06720081 | 0.01480666 | 0.09801195 |
| APOBEC3C   | 400.852433 | -0.9970985 | 0.01487965 | 0.09844795 |
| RRBP1      | 3731.49843 | 0.84843411 | 0.01490323 | 0.09851909 |
| SFRP5      | 24.5740757 | 2.0591115  | 0.01490156 | 0.09851909 |
| DPP8       | 1413.61013 | -0.5548276 | 0.01495331 | 0.09876511 |
| ZNF483     | 1720.68957 | -0.7657396 | 0.01494704 | 0.09876511 |
| MYOZ3      | 360.944425 | 1.68340402 | 0.01499852 | 0.09898249 |
| SYTL5      | 122.55813  | 2.03815683 | 0.0149991  | 0.09898249 |
| KRCC1      | 548.880918 | 0.63093327 | 0.01501304 | 0.09898941 |
| TDP2       | 484.077631 | -0.8233533 | 0.01501097 | 0.09898941 |
| ALS2CL     | 363.517502 | 1.45289365 | 0.01508045 | 0.09932724 |
| RAD51B     | 164.825675 | 1.03109852 | 0.01507325 | 0.09932724 |
| ZNF454     | 112.799088 | 1.31669707 | 0.01508367 | 0.09932724 |
| ACOT4      | 32.373463  | -1.3314319 | 0.01510981 | 0.09945674 |
| LATS1      | 2190.16082 | 0.51039083 | 0.01512899 | 0.09948971 |
| LOC1019295 | 17.4111845 | 1.74858824 | 0.01514072 | 0.09948971 |
| PDE4DIP    | 1939.9562  | 1.27136074 | 0.015137   | 0.09948971 |
| YDJC       | 67.5933665 | -0.8193481 | 0.01514071 | 0.09948971 |
| ITGA4      | 589.604759 | 0.99915687 | 0.01515216 | 0.09949163 |
| RBM47      | 690.743006 | -1.3262454 | 0.01515397 | 0.09949163 |
| C17orf96   | 54.6242839 | 1.44251727 | 0.01517677 | 0.09951057 |
| PCDHB1     | 17.6111043 | -1.8519732 | 0.01516856 | 0.09951057 |
| PNMAL2     | 198.037182 | 1.63586064 | 0.0151721  | 0.09951057 |
| WDR11      | 2434.69145 | 0.55240604 | 0.01518276 | 0.09951057 |
| ELOVL5     | 2699.13469 | -0.8962891 | 0.01521771 | 0.09965458 |
| MYOZ2      | 10.099699  | 1.5173269  | 0.01521195 | 0.09965458 |
| ETAA1      | 461.188801 | 0.48331152 | 0.01524541 | 0.09978213 |

|            |            |            |            |            |
|------------|------------|------------|------------|------------|
| SEMA3F     | 977.196409 | 1.45500436 | 0.01525018 | 0.09978213 |
| RHOF       | 71.209181  | -1.2713837 | 0.01526806 | 0.09982941 |
| TRAPPC10   | 1930.0163  | -0.7044569 | 0.0152704  | 0.09982941 |
| LOC1005064 | 56.9642854 | 1.06706115 | 0.01527822 | 0.09983806 |
| LINC00092  | 95.7486867 | 1.73452679 | 0.01533331 | 0.10015544 |
| CCDC74A    | 106.229753 | 1.54841106 | 0.01538568 | 0.10045479 |
| RPS27L     | 1506.26373 | -0.9068724 | 0.01540659 | 0.10054864 |
| MXRA8      | 3815.75091 | 1.29502172 | 0.01541688 | 0.10057303 |
| CUX2       | 14.018235  | 1.92167028 | 0.01544836 | 0.10073565 |
| KCNC3      | 455.863645 | 1.45314006 | 0.0154641  | 0.10079548 |
| AARS2      | 811.219712 | 0.52262375 | 0.01548653 | 0.10087164 |
| FAM118B    | 330.833158 | 0.52570251 | 0.01548891 | 0.10087164 |
| ANP32E     | 942.797822 | -0.688348  | 0.01551537 | 0.10089653 |
| NR2C2      | 2173.26538 | 0.46535044 | 0.01551901 | 0.10089653 |
| PRAP1      | 15.4491678 | -2.0718359 | 0.01551872 | 0.10089653 |
| ZNF839     | 264.049266 | 0.80709763 | 0.01550059 | 0.10089653 |
| MMP14      | 3977.07157 | -0.7500445 | 0.01554804 | 0.10099983 |
| ZFHX3      | 5628.30455 | 0.80853882 | 0.01554404 | 0.10099983 |
| LTBP2      | 29151.4275 | 1.85747611 | 0.01557089 | 0.10106277 |
| RAB42      | 33.0890442 | -1.6155677 | 0.01556909 | 0.10106277 |
| BTBD11     | 866.409603 | -1.7476269 | 0.01560428 | 0.10123673 |
| CDK6       | 3100.9638  | 1.26868943 | 0.01561782 | 0.1012818  |
| METTL6     | 301.359309 | 0.7415381  | 0.01562841 | 0.10128238 |
| NAA10      | 439.945596 | -0.754463  | 0.01563109 | 0.10128238 |
| CCDC33     | 33.0576739 | -2.0858739 | 0.01565342 | 0.10134157 |
| RGS18      | 176.591498 | 1.38620249 | 0.01565234 | 0.10134157 |
| PCDHA6     | 145.467382 | 1.74920273 | 0.01566931 | 0.1014017  |
| GATM       | 791.495473 | 1.47757182 | 0.01569575 | 0.10153004 |
| RASA4B     | 48.6626002 | 1.04403925 | 0.01573634 | 0.10172115 |
| TOX4       | 1556.9758  | -0.5334161 | 0.01573854 | 0.10172115 |
| TIMD4      | 7.86490216 | 1.96113092 | 0.01575918 | 0.10181174 |
| ACSF2      | 570.246056 | 1.366591   | 0.01579762 | 0.10201717 |
| FAM13A-AS1 | 183.381986 | 0.93008842 | 0.01582206 | 0.10208915 |
| MAVS       | 5753.30707 | -0.598594  | 0.01581669 | 0.10208915 |
| ATM        | 6741.2526  | 0.68674695 | 0.01583565 | 0.10209107 |
| LILRB5     | 28.7387719 | -1.8266485 | 0.01582916 | 0.10209107 |
| IK         | 1897.79866 | -0.5342209 | 0.01584637 | 0.10211734 |
| LTBR       | 1271.95089 | -0.6359384 | 0.01586045 | 0.10216523 |
| DEDD       | 466.058148 | -0.3490077 | 0.01587112 | 0.10219115 |
| CD40       | 211.091448 | 1.20152759 | 0.01589857 | 0.10223749 |
| ITM2C      | 11982.7278 | -1.579015  | 0.01589282 | 0.10223749 |
| MCTP2      | 172.04702  | -1.4285829 | 0.01588648 | 0.10223749 |
| RPS26      | 2691.9341  | -1.3366432 | 0.01590494 | 0.10223749 |
| C12orf66   | 160.193701 | -0.755107  | 0.01593005 | 0.10231327 |
| SLC44A1    | 4332.98735 | 1.20291311 | 0.01592588 | 0.10231327 |
| FCF1       | 593.338651 | -0.7710555 | 0.01595076 | 0.10240348 |
| SYNE3      | 281.234203 | 1.09075426 | 0.01596692 | 0.10246442 |
| DOPEY1     | 1878.06009 | 0.6332461  | 0.01599072 | 0.10257185 |
| ORMDL2     | 220.119522 | -0.8177929 | 0.01599702 | 0.10257185 |
| FCGR1C     | 68.1521114 | 1.65586233 | 0.01601397 | 0.10259494 |



|           |            |            |            |            |
|-----------|------------|------------|------------|------------|
| GART      | 1239.07743 | -0.4878795 | 0.01600879 | 0.10259494 |
| C19orf57  | 12.1631956 | 1.54923416 | 0.01605086 | 0.10271772 |
| MKL2      | 4997.37727 | -1.5636589 | 0.01604217 | 0.10271772 |
| MLLT11    | 187.074025 | -1.3039003 | 0.0160532  | 0.10271772 |
| CRLS1     | 578.199048 | -0.511174  | 0.01607147 | 0.1027427  |
| FAM160A1  | 316.03964  | -1.8518785 | 0.01607775 | 0.1027427  |
| PVRL2     | 2095.43408 | 0.73747422 | 0.01609054 | 0.1027427  |
| S100A1    | 9.09254122 | -2.0662518 | 0.01608864 | 0.1027427  |
| UBA6      | 1275.73413 | 0.44633366 | 0.01607392 | 0.1027427  |
| BRD9      | 655.226428 | -0.4535929 | 0.01610593 | 0.10279406 |
| TPD52     | 645.30231  | -1.6659038 | 0.01611196 | 0.10279406 |
| CDC25B    | 2662.35502 | -1.1389149 | 0.01612613 | 0.10284175 |
| TPT1      | 42403.0244 | -0.766658  | 0.01614239 | 0.10290269 |
| USP14     | 1663.05143 | -1.0197467 | 0.01616853 | 0.10302662 |
| ALG5      | 383.169129 | -0.688279  | 0.01620693 | 0.10305427 |
| LRRC28    | 212.585104 | -0.8816482 | 0.01621312 | 0.10305427 |
| MAN2A2    | 1293.44736 | -0.5195656 | 0.01621064 | 0.10305427 |
| RWDD3     | 104.283063 | 0.77475097 | 0.01620069 | 0.10305427 |
| SNX17     | 1821.61015 | 0.66052208 | 0.01621215 | 0.10305427 |
| TMEM17    | 70.6345919 | 0.84211446 | 0.01618724 | 0.10305427 |
| MRPL2     | 177.090076 | -0.6768298 | 0.01623311 | 0.10313865 |
| BLOC1S3   | 177.948046 | -0.6983773 | 0.01625442 | 0.1032034  |
| TOMM40    | 597.759726 | -0.6849334 | 0.01625674 | 0.1032034  |
| HNRNPH2   | 105.534331 | -0.7480823 | 0.01626619 | 0.10322074 |
| CHRNA5    | 10.4014375 | -1.6073676 | 0.01630001 | 0.10335001 |
| IGF2R     | 8561.32344 | -0.9560463 | 0.01629994 | 0.10335001 |
| PCDHA1    | 31.8411443 | 2.07829748 | 0.01630679 | 0.10335031 |
| DUOX1     | 477.092194 | 2.03100533 | 0.01632352 | 0.10341373 |
| HNRNPUL2  | 607.720681 | -0.5149684 | 0.01633568 | 0.10344811 |
| CERS5     | 714.925278 | -0.6745811 | 0.01636718 | 0.10360487 |
| AP4E1     | 971.288443 | -0.4555893 | 0.0163806  | 0.10363359 |
| SLC3A2    | 1481.84398 | -1.2212533 | 0.01638521 | 0.10363359 |
| POU6F2    | 300.221366 | -1.7333269 | 0.01639521 | 0.10365416 |
| HLA-DQB1  | 1605.57182 | 1.88326164 | 0.01641477 | 0.10371821 |
| PCDHA3    | 222.378067 | 1.79808545 | 0.01641884 | 0.10371821 |
| CDK17     | 894.151951 | -0.7795287 | 0.01645432 | 0.1038996  |
| LINC00910 | 76.2477269 | 1.34809468 | 0.01647493 | 0.103987   |
| RBM12     | 2736.90808 | -0.4998077 | 0.01649437 | 0.10406692 |
| PAPOLG    | 673.901392 | 0.73285287 | 0.01650546 | 0.10409414 |
| FAM180A   | 299.555183 | 2.03265527 | 0.01656366 | 0.10441832 |
| PRMT5     | 808.657259 | -0.6635385 | 0.01658462 | 0.10450757 |
| ZCWPW1    | 94.0152447 | 1.03249044 | 0.01663067 | 0.10475483 |
| GRIK1-AS1 | 11.8494554 | -1.7347081 | 0.01664802 | 0.10482114 |
| HLA-DOA   | 71.0383656 | 1.5224654  | 0.01669188 | 0.10483945 |
| MYH15     | 31.1666751 | 1.36421172 | 0.01668218 | 0.10483945 |
| RC3H2     | 1515.604   | -0.4848747 | 0.01668116 | 0.10483945 |
| SPG21     | 1153.49421 | -0.5643957 | 0.01668648 | 0.10483945 |
| TCFL5     | 438.190802 | -0.8692537 | 0.01667747 | 0.10483945 |
| XXYL1     | 480.336057 | 1.08593745 | 0.01665904 | 0.10483945 |
| ACOT1     | 42.7929938 | 1.20311454 | 0.01672174 | 0.10494119 |

|            |            |            |            |            |
|------------|------------|------------|------------|------------|
| EHF        | 540.873648 | -1.6778039 | 0.01672052 | 0.10494119 |
| NAMPT      | 3514.72856 | -1.1875095 | 0.01676473 | 0.10516807 |
| VWA9       | 735.978895 | -0.5816762 | 0.01677418 | 0.10518435 |
| SNX22      | 53.2387187 | 1.56518323 | 0.01678716 | 0.10522282 |
| TP53I3     | 907.390026 | 1.29976265 | 0.01680178 | 0.10527149 |
| FNDC3A     | 6051.09251 | -0.5578392 | 0.0168504  | 0.10553312 |
| SETD6      | 257.202558 | 0.56230975 | 0.01686057 | 0.10555375 |
| PPFIA4     | 89.4711563 | -1.7028656 | 0.01686967 | 0.10556774 |
| GPR141     | 26.2314249 | 1.52304794 | 0.0169018  | 0.10568271 |
| PWAR5      | 1358.37091 | -0.5937338 | 0.01689992 | 0.10568271 |
| EIF1B-AS1  | 37.3126507 | 1.31234195 | 0.01691515 | 0.10568412 |
| LRMP       | 174.021413 | 1.11648576 | 0.01691579 | 0.10568412 |
| AOAH       | 509.185123 | 1.3757084  | 0.0169432  | 0.10570146 |
| BREA2      | 8.78559692 | 1.84894411 | 0.01696103 | 0.10570146 |
| CACNA1I    | 9.91047336 | -1.8016283 | 0.01693881 | 0.10570146 |
| HAX1       | 882.017238 | -0.6112323 | 0.01696673 | 0.10570146 |
| HSPA4      | 2590.97852 | -0.5819275 | 0.01695296 | 0.10570146 |
| NUPR1      | 1106.16186 | -1.1376048 | 0.01692795 | 0.10570146 |
| SOSTDC1    | 13.9434895 | 1.81422885 | 0.01696234 | 0.10570146 |
| BDKRB2     | 134.955287 | -1.9468303 | 0.01697814 | 0.10572972 |
| ENHO       | 11.6142473 | 1.9405266  | 0.0169965  | 0.10576162 |
| KCNK1      | 479.412827 | -1.9346367 | 0.01700392 | 0.10576162 |
| MAP2K6     | 82.900999  | 1.36994925 | 0.01699759 | 0.10576162 |
| DMXL2      | 3817.76808 | -0.4863934 | 0.01704845 | 0.10588897 |
| DPY19L2P3  | 10.1458381 | 1.53005809 | 0.01703751 | 0.10588897 |
| LINC00641  | 837.90753  | -0.7200326 | 0.01706575 | 0.10588897 |
| NSUN5      | 279.53479  | 0.6092636  | 0.01705853 | 0.10588897 |
| SYT7       | 30.9178799 | 1.83784035 | 0.01706456 | 0.10588897 |
| ZBTB7A     | 663.511334 | -0.5826743 | 0.01704094 | 0.10588897 |
| C17orf97   | 81.6819002 | 1.08887299 | 0.01707649 | 0.10591282 |
| MDM2       | 5765.39809 | -0.694917  | 0.01708772 | 0.10593972 |
| ZMYM1      | 444.207137 | 0.67605569 | 0.01715986 | 0.10634404 |
| HOXC5      | 44.3187696 | 2.02352453 | 0.01718608 | 0.10644256 |
| SYNPO2     | 5190.59795 | 1.28389608 | 0.01718961 | 0.10644256 |
| CXorf40A   | 174.664401 | -0.5767984 | 0.01722004 | 0.10658805 |
| PRKAG2     | 2172.86576 | -1.5282675 | 0.01726128 | 0.10680028 |
| LGALS12    | 8.18871924 | 1.95141997 | 0.01728803 | 0.1069227  |
| PIGK       | 854.409065 | 0.63263381 | 0.0173273  | 0.10712248 |
| ERMN       | 12.9872297 | 1.72516332 | 0.01737509 | 0.10736826 |
| IGIP       | 784.17666  | 0.6052829  | 0.01738803 | 0.10736826 |
| LOC1001316 | 18.784508  | -1.1498159 | 0.01738453 | 0.10736826 |
| KLHL2      | 487.771184 | -0.8919342 | 0.0174525  | 0.10767985 |
| 8-Sep      | 2133.98683 | 0.6110067  | 0.01744876 | 0.10767985 |
| TXN        | 846.371818 | -1.0094064 | 0.01750964 | 0.10798902 |
| JMJD7      | 107.846653 | 0.85521992 | 0.01752194 | 0.10802147 |
| CDS1       | 103.888239 | -1.9242626 | 0.0175424  | 0.10806088 |
| LOC1005066 | 13.2684915 | 2.00799415 | 0.01753555 | 0.10806088 |
| NAALADL2   | 266.984283 | 0.72338814 | 0.01759697 | 0.10835364 |
| WNT3       | 96.4606262 | 1.32765802 | 0.01761187 | 0.10840193 |
| CHERP      | 683.424544 | -0.6057977 | 0.01764409 | 0.10846982 |

|            |            |            |            |            |
|------------|------------|------------|------------|------------|
| DEPDC7     | 24.0413126 | 1.60189114 | 0.01763876 | 0.10846982 |
| MRPL46     | 221.377496 | -0.7161815 | 0.01763686 | 0.10846982 |
| LOC646762  | 497.010417 | 1.07590512 | 0.0176666  | 0.10856477 |
| PCID2      | 527.407679 | -0.4088917 | 0.01773482 | 0.10894044 |
| ERC1       | 3851.99036 | -0.6210651 | 0.01775804 | 0.10903949 |
| CCL26      | 189.646996 | 1.10963784 | 0.01777462 | 0.10905946 |
| CYB5R3     | 2719.15546 | -1.1403605 | 0.01777549 | 0.10905946 |
| ADAM11     | 86.026018  | 1.15269996 | 0.01781334 | 0.10924806 |
| PIK3R1     | 9249.4693  | 1.57791783 | 0.01785359 | 0.10945121 |
| ARHGAP4    | 751.482319 | 1.08203053 | 0.01788838 | 0.10962074 |
| MTFR2      | 15.1893852 | -1.3731714 | 0.01789645 | 0.10962647 |
| IFITM2     | 2510.02436 | -1.2891174 | 0.01791635 | 0.10970461 |
| TFDP2      | 2285.25676 | 0.79561033 | 0.01795102 | 0.10987313 |
| CASKIN2    | 663.233224 | 0.83414167 | 0.01796948 | 0.10989855 |
| GRB2       | 2589.78353 | -0.3891851 | 0.01796617 | 0.10989855 |
| SQSTM1     | 7666.0648  | -1.1690539 | 0.01798788 | 0.1099673  |
| IFNLR1     | 175.393114 | 1.04443762 | 0.01799757 | 0.10998274 |
| AP3D1      | 3310.86145 | -0.4681104 | 0.01802968 | 0.11005482 |
| ARHGAP15   | 265.331212 | 1.21514322 | 0.01805284 | 0.11005482 |
| BBS7       | 412.97689  | -0.4701811 | 0.0180534  | 0.11005482 |
| FN3K       | 133.264408 | -1.0578053 | 0.01805015 | 0.11005482 |
| MYO6       | 2719.55523 | -1.1110508 | 0.01804499 | 0.11005482 |
| PEX3       | 351.053285 | 0.40009391 | 0.01802264 | 0.11005482 |
| PTPLAD2    | 216.547108 | 0.87297175 | 0.01806667 | 0.11005482 |
| SH3BGRL    | 3162.66668 | -0.596096  | 0.01806193 | 0.11005482 |
| SMAP2      | 1774.2016  | 1.1408364  | 0.01808407 | 0.11011716 |
| PHYH       | 214.523878 | -0.754981  | 0.01809749 | 0.1101552  |
| CHST5      | 7.71934591 | 1.79241923 | 0.01811461 | 0.11021576 |
| LURAP1L    | 111.452853 | 1.56431027 | 0.01817958 | 0.11056723 |
| RHBDF1     | 1052.7142  | 0.64823831 | 0.01820524 | 0.11067948 |
| RNF185     | 964.344038 | -0.8888547 | 0.01824765 | 0.11089344 |
| FSTL3      | 2247.52079 | -1.2326567 | 0.01829151 | 0.11111605 |
| PRKD1      | 208.017319 | 1.61038654 | 0.01836032 | 0.11148997 |
| PFN4       | 9.9336059  | 1.61453059 | 0.01837    | 0.11150468 |
| TFG        | 1448.37134 | -0.5357984 | 0.0183895  | 0.11157896 |
| PAXBP1-AS1 | 99.8745753 | 0.94829615 | 0.01840841 | 0.11164961 |
| CYP4F11    | 9.82463686 | -2.0199488 | 0.01843712 | 0.11177958 |
| OSGIN2     | 2376.84036 | 0.88036096 | 0.01846878 | 0.11188324 |
| RCE1       | 142.817978 | -0.6507166 | 0.01846374 | 0.11188324 |
| DPH6-AS1   | 37.5492873 | 1.01575212 | 0.01848398 | 0.11193118 |
| CTDSP2     | 5025.10553 | -0.5120022 | 0.01852116 | 0.11211212 |
| CERS4      | 340.247255 | -0.6147702 | 0.0185604  | 0.11217286 |
| LOC90246   | 56.6982056 | 1.88807702 | 0.01855721 | 0.11217286 |
| SARNP      | 595.277205 | -0.5701597 | 0.01855412 | 0.11217286 |
| SFMBT2     | 1239.82318 | 0.96470721 | 0.01855854 | 0.11217286 |
| MAP4K3     | 1020.86494 | 0.49814277 | 0.01857804 | 0.11223532 |
| SMC5-AS1   | 28.2710094 | 1.00976856 | 0.01860254 | 0.11233915 |
| LUC7L3     | 3725.61972 | 0.45491726 | 0.0186143  | 0.11236603 |
| DBX2       | 21.6687839 | 2.02439374 | 0.01862909 | 0.11241112 |
| ARHGEF40   | 1694.65917 | 0.77974226 | 0.01866896 | 0.11260746 |

|            |            |            |            |            |
|------------|------------|------------|------------|------------|
| HPSE       | 134.996763 | -1.0976776 | 0.01871482 | 0.11261879 |
| IFT140     | 886.237799 | 0.64960448 | 0.01868854 | 0.11261879 |
| LTC4S      | 80.2623746 | 1.33421144 | 0.01870616 | 0.11261879 |
| MEF2C-AS1  | 43.289974  | 1.62919659 | 0.0187035  | 0.11261879 |
| PGAM5      | 423.959923 | -0.6166309 | 0.01868824 | 0.11261879 |
| ZNF500     | 454.086388 | 0.4432467  | 0.01871026 | 0.11261879 |
| CPT1C      | 189.721343 | 1.60775807 | 0.01874691 | 0.11276774 |
| CREM       | 828.869875 | -1.289903  | 0.01876002 | 0.11280242 |
| CCT5       | 2218.4658  | -0.6485792 | 0.01884831 | 0.11328896 |
| LOC1001314 | 13.7365415 | 1.40674486 | 0.01887072 | 0.11337931 |
| METRNL     | 212.652664 | -0.6436682 | 0.01890771 | 0.11355711 |
| HDDC2      | 679.767983 | -0.451817  | 0.01892303 | 0.1136047  |
| UFD1L      | 384.196071 | -0.8524157 | 0.01895195 | 0.11373389 |
| CPNE5      | 162.797174 | 1.8184114  | 0.0189646  | 0.11375064 |
| TBX3       | 13.8467209 | 1.71573871 | 0.01896955 | 0.11375064 |
| ZNF467     | 127.555114 | -1.1121025 | 0.01901136 | 0.1139569  |
| ZNF281     | 530.446291 | -0.6445603 | 0.01904293 | 0.11410162 |
| PSME3      | 1234.65237 | -0.4738825 | 0.01906683 | 0.1142003  |
| MYRF       | 13.8805263 | -1.871659  | 0.01908123 | 0.11424196 |
| PKD4       | 3017.45621 | 1.29599157 | 0.0190913  | 0.11425778 |
| KIF26A     | 62.5516883 | 1.60588035 | 0.01912293 | 0.11440246 |
| ABHD17A    | 596.034471 | -0.5973279 | 0.01914148 | 0.11446888 |
| FHL2       | 325.489207 | -1.1915776 | 0.0191971  | 0.11471217 |
| MACROD1    | 70.0647387 | 1.44468703 | 0.01919114 | 0.11471217 |
| SOX4       | 752.516269 | 0.7100111  | 0.01924553 | 0.11491221 |
| TLX1       | 36.9990974 | 2.02633139 | 0.01924329 | 0.11491221 |
| NDUFA7     | 401.830626 | -0.9387338 | 0.0192782  | 0.11506252 |
| AGPAT3     | 1901.26566 | -0.5958718 | 0.019309   | 0.1151998  |
| KCNN3      | 288.808842 | 1.37752929 | 0.01931619 | 0.1151998  |
| ALDH5A1    | 567.463857 | 0.71374709 | 0.0193341  | 0.11521057 |
| CENPBD1P1  | 556.649701 | -0.6349487 | 0.0193405  | 0.11521057 |
| MAP2K3     | 383.99023  | -0.970713  | 0.01933468 | 0.11521057 |
| NUPL1      | 1102.44636 | -0.5115862 | 0.01937055 | 0.11530018 |
| SCML1      | 406.650886 | -0.909573  | 0.01936722 | 0.11530018 |
| CITED1     | 13.689559  | -1.7115134 | 0.01938885 | 0.11534154 |
| PTPN11     | 3322.92375 | -0.562739  | 0.01939251 | 0.11534154 |
| FASTKD5    | 419.689756 | -0.4919547 | 0.01941145 | 0.11537161 |
| ZNRF2      | 532.660344 | 0.89794022 | 0.01941259 | 0.11537161 |
| EFTUD1P1   | 62.9796778 | 1.5865222  | 0.01947272 | 0.1156395  |
| SF1        | 2775.04122 | -0.6585256 | 0.01946633 | 0.1156395  |
| TEX30      | 65.8379584 | -0.7553945 | 0.01949491 | 0.11572654 |
| SKP1       | 5469.55388 | -0.930777  | 0.01952006 | 0.11583109 |
| UBE2Z      | 2031.84941 | -0.4271929 | 0.0195323  | 0.11585895 |
| CC2D2A     | 663.799573 | 1.18381506 | 0.01960177 | 0.11622615 |
| GIGYF1     | 2068.44673 | 0.68341497 | 0.01963132 | 0.11635647 |
| GRIN2A     | 25.1614497 | 1.89327188 | 0.01965418 | 0.11644706 |
| EVA1C      | 452.280783 | -1.3599373 | 0.0196715  | 0.1164598  |
| MFI2       | 44.2989944 | -1.7873198 | 0.01966804 | 0.1164598  |
| NFATC2     | 573.221371 | 1.00551549 | 0.01970786 | 0.11658522 |
| NR3C1      | 3844.87331 | 0.76394753 | 0.01970193 | 0.11658522 |

|            |            |            |            |            |
|------------|------------|------------|------------|------------|
| COL25A1    | 68.2787325 | 1.06519062 | 0.01979154 | 0.11703521 |
| DSCAM      | 13.9387484 | 1.79908382 | 0.01980555 | 0.11707299 |
| VAMP8      | 601.872133 | -0.9726402 | 0.01981681 | 0.11709451 |
| XRCC1      | 501.393128 | -0.4176425 | 0.0198296  | 0.117125   |
| FBXL15     | 136.1906   | -0.6950275 | 0.01987336 | 0.1173022  |
| KLHL15     | 1113.89444 | -0.7459721 | 0.01987487 | 0.1173022  |
| ATP6V1G1   | 1495.64592 | -0.5399695 | 0.01989637 | 0.11733897 |
| MOC53      | 236.595867 | -0.6519233 | 0.01989429 | 0.11733897 |
| ATP11A     | 1468.20036 | -0.6392185 | 0.0199224  | 0.11737698 |
| CECR6      | 82.5748514 | 1.37317465 | 0.01992302 | 0.11737698 |
| IL18R1     | 133.953888 | -1.2986308 | 0.01992574 | 0.11737698 |
| ID1        | 3973.05023 | -1.3242092 | 0.01995869 | 0.11748095 |
| SNORA80A   | 48.2302411 | 1.54607785 | 0.01995558 | 0.11748095 |
| ITPRIPL2   | 2001.03947 | 0.58134124 | 0.0200035  | 0.11769962 |
| MS4A14     | 160.118002 | 1.55485524 | 0.02001425 | 0.11771779 |
| NME3       | 350.275842 | 0.87411411 | 0.02002687 | 0.11774697 |
| PCDHB15    | 188.727812 | -1.5034631 | 0.02003796 | 0.11776711 |
| PCNA       | 944.184213 | -0.5635874 | 0.02006256 | 0.11786657 |
| GDF11      | 356.718966 | -1.0722812 | 0.02007296 | 0.11788258 |
| FER1L5     | 8.02496467 | 1.98104454 | 0.0201091  | 0.11804973 |
| LINC00896  | 9.30797463 | 1.71060673 | 0.02012819 | 0.11811663 |
| DLEC1      | 225.616878 | 1.17392259 | 0.02018387 | 0.11839815 |
| IRAK1BP1   | 280.890285 | 0.54850635 | 0.02021555 | 0.11853875 |
| ADCK2      | 317.435371 | 0.88709847 | 0.0202644  | 0.11873453 |
| PIGA       | 265.224778 | -0.9192372 | 0.02025952 | 0.11873453 |
| TSPAN7     | 2354.94957 | 1.60699835 | 0.02027828 | 0.11877055 |
| ETV3       | 334.058149 | -0.6475315 | 0.0202906  | 0.11879745 |
| LINC00339  | 123.558741 | 0.83326347 | 0.02030509 | 0.11883699 |
| GSPT2      | 320.7114   | -0.7948216 | 0.02034706 | 0.11903728 |
| C8orf59    | 273.969947 | -0.4817147 | 0.02035993 | 0.11904473 |
| EOMES      | 12.2105962 | 1.6671695  | 0.02036907 | 0.11904473 |
| PDZD2      | 4719.03343 | -0.8273532 | 0.02037158 | 0.11904473 |
| PEAR1      | 1929.52453 | 1.16444441 | 0.02038468 | 0.11907598 |
| DCT        | 18.0642221 | 1.39255678 | 0.02040212 | 0.11908729 |
| LINC01094  | 247.813082 | 1.28444239 | 0.0204017  | 0.11908729 |
| PEX5       | 844.333753 | -0.7474566 | 0.02045277 | 0.11933758 |
| ARID3A     | 196.653584 | -1.3133872 | 0.02046278 | 0.11935065 |
| C19orf38   | 37.6001323 | 1.42979946 | 0.02052483 | 0.11966717 |
| SSBP4      | 732.352267 | -0.4997248 | 0.02055082 | 0.11977322 |
| CLASRP     | 589.316502 | -0.5015486 | 0.02061995 | 0.12013054 |
| GIT1       | 1190.51284 | -0.5587383 | 0.02066395 | 0.12034126 |
| LOC728989  | 9.00906843 | 1.83626312 | 0.02067327 | 0.1203499  |
| CDK14      | 1055.09592 | 0.87282437 | 0.02069282 | 0.12041808 |
| LOC1006309 | 30.7858373 | 1.06405456 | 0.02071002 | 0.12047256 |
| ATP5O      | 1445.62674 | -0.4937834 | 0.02072848 | 0.12048868 |
| CLDN7      | 113.651351 | -1.4776841 | 0.02072763 | 0.12048868 |
| TLR2       | 1660.41209 | 1.12093991 | 0.02074071 | 0.12051421 |
| AIM1       | 298.416953 | 1.13043923 | 0.02080081 | 0.12071825 |
| BTBD8      | 49.3135939 | 1.07267731 | 0.02083853 | 0.12071825 |
| DDO        | 9.42759252 | 1.59311243 | 0.02080304 | 0.12071825 |

|           |            |            |            |            |
|-----------|------------|------------|------------|------------|
| FOXN2     | 824.692355 | 0.93207581 | 0.02082657 | 0.12071825 |
| MRPL45P2  | 155.517565 | 0.73183662 | 0.02082981 | 0.12071825 |
| MRPS34    | 400.221751 | -0.4725145 | 0.02082959 | 0.12071825 |
| PQBP1     | 446.6609   | -0.6273778 | 0.02083869 | 0.12071825 |
| TOMM20    | 3886.12541 | -0.6383753 | 0.02078712 | 0.12071825 |
| ZYX       | 2485.40218 | -0.9632537 | 0.02086497 | 0.12082493 |
| HSD17B11  | 690.713101 | 0.53321545 | 0.02090402 | 0.12100545 |
| SLC46A1   | 775.015762 | 0.73417825 | 0.02097409 | 0.12136533 |
| SRSF6     | 4121.44036 | -0.583649  | 0.02099002 | 0.12141175 |
| ZDHHC14   | 233.822705 | 1.11422241 | 0.02103052 | 0.12160027 |
| CR1       | 52.3144431 | -1.7778609 | 0.02105129 | 0.12167454 |
| TMEM176A  | 36.7650852 | -1.8857731 | 0.02106241 | 0.12169303 |
| CEP112    | 637.845312 | 0.61560231 | 0.02107479 | 0.12171879 |
| TMOD2     | 1530.19209 | 0.89081621 | 0.02108587 | 0.12173704 |
| PWARSN    | 615.541864 | -0.5819484 | 0.0211082  | 0.12182017 |
| TLR1      | 686.664866 | 0.74060611 | 0.02112503 | 0.12187151 |
| DLST      | 1366.77443 | -0.6171577 | 0.0211349  | 0.12188271 |
| VPS13C    | 12548.8627 | -0.5426361 | 0.02114684 | 0.12190579 |
| CIAPIN1   | 443.696344 | 0.53904216 | 0.02117915 | 0.12190908 |
| SH2B1     | 1529.28021 | 0.6897217  | 0.02117165 | 0.12190908 |
| TOE1      | 184.727572 | -0.8821513 | 0.02115676 | 0.12190908 |
| ZNF497    | 39.2820174 | 1.04828217 | 0.02117057 | 0.12190908 |
| DAK       | 383.574353 | 0.6943846  | 0.0211991  | 0.12197821 |
| ZIC5      | 854.836868 | -0.6587822 | 0.02125373 | 0.12224675 |
| TLR3      | 245.245564 | 0.96990856 | 0.02129948 | 0.12246403 |
| DCK       | 486.320298 | 0.75708412 | 0.02131535 | 0.12247776 |
| NR1D2     | 2157.02958 | 1.11440481 | 0.02131781 | 0.12247776 |
| EGLN2     | 51.6995939 | -0.7677047 | 0.02135784 | 0.12266188 |
| FHOD1     | 639.581875 | 0.6066108  | 0.02136834 | 0.1226763  |
| CDKN2D    | 59.3914556 | -1.3393759 | 0.02138456 | 0.12269357 |
| HECTD2    | 1082.06545 | 0.9450951  | 0.02138732 | 0.12269357 |
| SCN3B     | 23.603901  | -1.5682688 | 0.02146475 | 0.12309182 |
| RABGEF1   | 998.948563 | 0.59410372 | 0.02148533 | 0.12316384 |
| DUXAP10   | 9.42375137 | 1.83287862 | 0.021544   | 0.12340806 |
| LAPTM4B   | 1486.89941 | 0.75350745 | 0.02153924 | 0.12340806 |
| CIPC      | 764.344093 | -0.5758269 | 0.0215901  | 0.12362606 |
| LOC115110 | 25.1479646 | 1.46197733 | 0.02166651 | 0.1239712  |
| SPG11     | 3813.22054 | -0.3696145 | 0.02166417 | 0.1239712  |
| TMEM104   | 543.636565 | 0.67520672 | 0.02169346 | 0.12398685 |
| WFDC2     | 189.003228 | -1.9101888 | 0.02167863 | 0.12398685 |
| ZNF425    | 83.0097957 | 0.87835728 | 0.02169053 | 0.12398685 |
| SALL1     | 115.825257 | 1.8887022  | 0.02170995 | 0.12403496 |
| CCNI2     | 17.7555641 | 1.8582248  | 0.02172648 | 0.12408323 |
| C6orf106  | 1906.79119 | -0.5228805 | 0.02174348 | 0.12408819 |
| TSPAN18   | 2856.54256 | 1.36761756 | 0.0217435  | 0.12408819 |
| REXO1     | 578.781685 | -0.5806988 | 0.02176901 | 0.12418764 |
| CAMK2B    | 35.5629754 | 1.60429613 | 0.02179834 | 0.12426268 |
| GAB2      | 1650.22528 | 0.98044959 | 0.02179637 | 0.12426268 |
| AQP7      | 8.92842776 | 1.90491005 | 0.02183394 | 0.12441942 |
| PWP1      | 901.796006 | -0.5774654 | 0.02190457 | 0.12477562 |

|            |            |            |            |            |
|------------|------------|------------|------------|------------|
| SPIN4      | 368.573605 | -0.5558366 | 0.02192378 | 0.12483876 |
| ATOX1      | 356.580761 | -0.697742  | 0.02196322 | 0.12500931 |
| PSMD8      | 1438.7454  | -0.7032121 | 0.02199441 | 0.12500931 |
| RBL2       | 2889.05524 | 0.61838344 | 0.02197948 | 0.12500931 |
| SSH3       | 824.549443 | -0.8068205 | 0.02198718 | 0.12500931 |
| TRNT1      | 331.810615 | 0.61394298 | 0.02198486 | 0.12500931 |
| HS3ST3A1   | 39.6003199 | 1.861652   | 0.02201574 | 0.12505935 |
| THEM6      | 258.966103 | 0.59872673 | 0.0220195  | 0.12505935 |
| PIM3       | 285.950883 | -1.511401  | 0.02203155 | 0.12508153 |
| C8orf88    | 518.812246 | -1.2137942 | 0.02204832 | 0.12508431 |
| ENG        | 2770.83337 | 1.3916553  | 0.02204114 | 0.12508431 |
| PKM        | 13319.3204 | -1.1638832 | 0.02205648 | 0.1250844  |
| KIAA0232   | 2116.99174 | -0.4481553 | 0.0220772  | 0.1251557  |
| FKBP10     | 3195.6136  | 0.74870077 | 0.02208743 | 0.12516753 |
| ACTR8      | 623.190948 | 0.76840086 | 0.02212492 | 0.12533375 |
| TMEM54     | 174.250765 | -0.8724196 | 0.02213351 | 0.12533621 |
| NCK1       | 942.179875 | -0.4813067 | 0.02217008 | 0.12540404 |
| PDGFB      | 593.865306 | 0.97805625 | 0.02216775 | 0.12540404 |
| PIAS4      | 213.533252 | -0.5523336 | 0.02217971 | 0.12540404 |
| SLC25A10   | 62.039775  | 1.20427864 | 0.0221863  | 0.12540404 |
| SLC25A12   | 792.261022 | 0.71799535 | 0.02217315 | 0.12540404 |
| TCF12      | 3965.01621 | -0.7402444 | 0.02219939 | 0.12543184 |
| WIBG       | 292.132532 | -0.4464871 | 0.02231957 | 0.12606453 |
| ANXA2R     | 44.8324692 | 1.24547107 | 0.02234239 | 0.12608652 |
| FIP1L1     | 815.318031 | -0.4283037 | 0.02235629 | 0.12608652 |
| TUBA8      | 31.7435341 | -1.4270818 | 0.02235248 | 0.12608652 |
| VPS9D1     | 318.293945 | 0.69126841 | 0.02234127 | 0.12608652 |
| GIPC1      | 1329.16319 | -0.6665048 | 0.02239298 | 0.12624713 |
| SRGAP3     | 659.409658 | 1.056463   | 0.02241973 | 0.12635157 |
| TFCP2      | 800.420015 | -0.800481  | 0.02251572 | 0.12679949 |
| ZNHIT3     | 296.710699 | -0.372159  | 0.02251382 | 0.12679949 |
| COX17      | 280.53882  | -0.8425201 | 0.02253584 | 0.12682916 |
| PFDN5      | 2944.52114 | -0.5144822 | 0.0225375  | 0.12682916 |
| UTP14A     | 393.937705 | -0.5082198 | 0.02259695 | 0.12711715 |
| HYOU1      | 2976.14462 | -0.9878136 | 0.02263557 | 0.1272424  |
| JRKL       | 449.432952 | -0.4196587 | 0.02263578 | 0.1272424  |
| WBP1       | 49.3830991 | 0.92259302 | 0.02266975 | 0.12738673 |
| ALX4       | 1868.9832  | 1.90461895 | 0.02268253 | 0.12739474 |
| ARL5B      | 580.821897 | -0.5715279 | 0.02269152 | 0.12739474 |
| TMCO3      | 1926.67537 | -0.9296205 | 0.02269605 | 0.12739474 |
| ASAH1      | 2504.37484 | -0.6463629 | 0.02272005 | 0.12748288 |
| LHFPL2     | 8301.58937 | -1.1822467 | 0.02273841 | 0.12753913 |
| STK11      | 1118.07542 | -0.723061  | 0.02275498 | 0.12753913 |
| WAC        | 3235.4984  | -0.3587422 | 0.02275275 | 0.12753913 |
| MTIF3      | 514.26367  | -0.6301333 | 0.02280791 | 0.12778918 |
| PRUNE      | 483.264483 | -0.5331477 | 0.02285577 | 0.12796399 |
| UBA52      | 4688.75229 | -0.4432451 | 0.02284765 | 0.12796399 |
| LINC00565  | 12.3973841 | 1.74358719 | 0.02286927 | 0.12797155 |
| LOC1019278 | 22.8022233 | 1.30911455 | 0.02287378 | 0.12797155 |
| ITGAL      | 294.782419 | 1.32561577 | 0.02291569 | 0.12808761 |

|             |            |            |            |            |
|-------------|------------|------------|------------|------------|
| MGST3       | 891.087767 | -0.7049963 | 0.02291326 | 0.12808761 |
| PDZK1IP1    | 21.4435927 | 1.95036321 | 0.02291954 | 0.12808761 |
| IFITM3      | 6019.1022  | -1.1319154 | 0.02292918 | 0.12809489 |
| BDH1        | 138.911621 | 0.91585194 | 0.02301117 | 0.12850624 |
| TSR2        | 634.620133 | -0.5975392 | 0.02302207 | 0.12852038 |
| ATXN7L2     | 112.292685 | 1.03100148 | 0.02308011 | 0.12875079 |
| PDLIM1      | 680.709738 | -1.5875243 | 0.02307821 | 0.12875079 |
| FAM168A     | 2566.74567 | 0.64749927 | 0.02314208 | 0.12900425 |
| HSP90B2P    | 57.6637585 | -1.1488154 | 0.02314234 | 0.12900425 |
| AKAP11      | 6561.21252 | -0.5787646 | 0.02315552 | 0.12903091 |
| CALML3-AS1  | 15.4253419 | -1.5275439 | 0.02320019 | 0.12923295 |
| CALB2       | 11.3490871 | 1.95490229 | 0.02323676 | 0.12938786 |
| PEAK1       | 4941.0167  | 1.13670197 | 0.02324484 | 0.12938786 |
| LOC1019270  | 64.1227167 | 1.20433179 | 0.02326197 | 0.12943631 |
| CHCHD6      | 281.602159 | 1.48326592 | 0.02330787 | 0.12959782 |
| SLC4A3      | 163.448869 | 1.39855566 | 0.02330205 | 0.12959782 |
| FFAR4       | 17.6179089 | 1.20320489 | 0.02336993 | 0.12978952 |
| KCNQ3       | 953.035981 | 1.29155846 | 0.02336397 | 0.12978952 |
| RNF114      | 1213.72557 | -0.4361412 | 0.02336607 | 0.12978952 |
| TICAM1      | 179.148551 | -0.6927462 | 0.02337614 | 0.12978952 |
| PSMC5       | 1008.62949 | -0.5582222 | 0.02339272 | 0.12983468 |
| SQLE        | 352.14097  | -1.0066035 | 0.02340189 | 0.12983867 |
| C19orf70    | 316.696641 | -0.5643461 | 0.02341741 | 0.12987784 |
| PPP3CA      | 1317.07188 | -0.8208592 | 0.02343088 | 0.12990564 |
| AAGAB       | 908.703384 | -0.6952915 | 0.02344506 | 0.1299373  |
| NIPBL       | 4625.2708  | -0.5973747 | 0.0234535  | 0.1299373  |
| CUL4A       | 1622.43037 | -0.5048356 | 0.02350292 | 0.13016414 |
| USP39       | 620.45917  | -0.4011119 | 0.02356029 | 0.13043486 |
| RPL35       | 4103.24173 | -0.4387824 | 0.0235804  | 0.13049916 |
| SUGT1       | 713.16271  | -0.550977  | 0.0235954  | 0.13053515 |
| ANKHD1-EIF4 | 18.7212656 | -1.2278164 | 0.02364241 | 0.13074815 |
| ZNF783      | 665.479949 | 0.52834885 | 0.02378988 | 0.13151634 |
| TAF1D       | 471.148022 | -0.7482337 | 0.02383675 | 0.13172806 |
| CELF1       | 3749.60589 | -0.5635611 | 0.0238865  | 0.13195554 |
| ALMS1P      | 9.78709306 | 1.61005133 | 0.02390761 | 0.13202469 |
| LOC730183   | 14.4564247 | 1.35933555 | 0.02396067 | 0.13227011 |
| RAB5C       | 1804.67373 | -0.6153578 | 0.0239843  | 0.132353   |
| HECTD4      | 6258.34684 | -0.3121226 | 0.02401885 | 0.1324485  |
| MRPS25      | 1200.42824 | 0.78484798 | 0.02401826 | 0.1324485  |
| SMPD1       | 904.05969  | 0.75705976 | 0.02405175 | 0.13258234 |
| CDS2        | 3323.69048 | -0.7365326 | 0.02409629 | 0.13278025 |
| PPP1R26     | 422.070204 | 0.48001398 | 0.02418136 | 0.13320125 |
| AQP1        | 5179.83148 | 1.82852963 | 0.02421355 | 0.13323521 |
| LOC1019292  | 11.0181927 | 1.4352326  | 0.02420353 | 0.13323521 |
| PGM1        | 1113.91169 | 1.10912918 | 0.02420885 | 0.13323521 |
| NLGN4Y      | 168.816896 | -1.7782691 | 0.02444037 | 0.13438706 |
| THBD        | 425.204917 | -1.6075592 | 0.02443579 | 0.13438706 |
| CRAMP1L     | 1393.45813 | 0.69226922 | 0.02445517 | 0.13442029 |
| KRI1        | 480.759919 | -0.5576761 | 0.02448136 | 0.13443446 |
| SLC7A9      | 8.64505719 | 1.51714066 | 0.024484   | 0.13443446 |



|           |            |            |            |            |
|-----------|------------|------------|------------|------------|
| USP13     | 817.639962 | -0.6949208 | 0.02446925 | 0.13443446 |
| GPR162    | 331.808211 | 1.19543425 | 0.02454287 | 0.1347096  |
| LGALS1    | 2694.98225 | -0.9119489 | 0.0245582  | 0.13474558 |
| CIR1      | 567.979129 | -0.3984864 | 0.02457421 | 0.13475567 |
| FIG4      | 473.186497 | 0.62568289 | 0.02460967 | 0.13475567 |
| PARP9     | 1054.50057 | -0.5040678 | 0.02460653 | 0.13475567 |
| POLR1D    | 734.603778 | -0.4123915 | 0.02459869 | 0.13475567 |
| SCN4A     | 41.4964585 | 1.61877544 | 0.02461267 | 0.13475567 |
| USP11     | 2374.40606 | -0.4644109 | 0.02458836 | 0.13475567 |
| CYTL1     | 73.2028882 | 1.30248743 | 0.02468475 | 0.13505406 |
| TWIST2    | 64.965032  | -1.5432129 | 0.02467648 | 0.13505406 |
| EIF1B     | 295.84096  | -0.8001429 | 0.02469604 | 0.13506775 |
| SOCS4     | 1253.60324 | 0.79542186 | 0.02476442 | 0.13539352 |
| HDC       | 23.7486109 | 1.58544064 | 0.02477377 | 0.13539648 |
| GRAMD1A   | 1107.92437 | -0.6764896 | 0.02479506 | 0.13546462 |
| FAM210A   | 400.577375 | -0.6449817 | 0.02484559 | 0.13567263 |
| TXNL1     | 741.434014 | -0.6572734 | 0.0248508  | 0.13567263 |
| LAS1L     | 640.429954 | -0.5293885 | 0.02486943 | 0.13572613 |
| DUSP6     | 1601.02636 | -1.1305003 | 0.02490271 | 0.13581128 |
| UNC119B   | 1094.70057 | -0.584868  | 0.02489681 | 0.13581128 |
| BIRC2     | 1821.4047  | 0.36972935 | 0.02493723 | 0.13587578 |
| ITGA9-AS1 | 13.9395909 | 1.20294873 | 0.02494531 | 0.13587578 |
| LINC00222 | 12.2590905 | 1.50849684 | 0.02494321 | 0.13587578 |
| MGC16142  | 29.6668718 | 0.95549318 | 0.02495711 | 0.13587578 |
| NUDT16P1  | 86.1828391 | 1.25966242 | 0.02495876 | 0.13587578 |
| IGSF3     | 606.454895 | 1.21236251 | 0.02499621 | 0.13603145 |
| CHST7     | 163.474418 | 1.52645501 | 0.02500713 | 0.13604268 |
| BEND7     | 151.407877 | -0.8301409 | 0.02502066 | 0.13606811 |
| PRR11     | 94.9431878 | 0.68975287 | 0.02503246 | 0.13608411 |
| NAPB      | 584.088491 | -0.5594754 | 0.02511728 | 0.13649693 |
| CHD2      | 5245.37835 | -0.3512035 | 0.02522311 | 0.13688046 |
| CYP4F35P  | 170.04847  | 1.92944327 | 0.02523437 | 0.13688046 |
| INHBA     | 73.5082307 | 1.50966179 | 0.02521056 | 0.13688046 |
| MMP17     | 139.691634 | 1.66702709 | 0.02523612 | 0.13688046 |
| NOVA1     | 340.676401 | -1.438718  | 0.02521873 | 0.13688046 |
| RAB28     | 363.818196 | 0.36764787 | 0.02524132 | 0.13688046 |
| EIF6      | 906.779519 | -0.6003719 | 0.02526126 | 0.13694029 |
| GNAI1     | 237.277063 | 0.83198347 | 0.02532241 | 0.13722334 |
| CCDC151   | 29.0256241 | -1.4890374 | 0.02533401 | 0.13723778 |
| PAQR4     | 53.9711874 | 0.88211081 | 0.02539263 | 0.13750685 |
| CCT6B     | 66.2303661 | 0.91117774 | 0.02544907 | 0.13775218 |
| MEF2A     | 4051.88562 | 0.62254951 | 0.02545586 | 0.13775218 |
| GTPBP4    | 658.294923 | -0.591871  | 0.02549988 | 0.13785539 |
| TMEM248   | 4145.56495 | 0.50475242 | 0.02549623 | 0.13785539 |
| TTC39B    | 524.037279 | 0.75087169 | 0.02550186 | 0.13785539 |
| CPNE2     | 284.525791 | 0.90339463 | 0.02552581 | 0.13793633 |
| PPARGC1A  | 1310.58229 | 1.55299608 | 0.0255393  | 0.1379607  |
| S100A16   | 1172.00941 | -1.1394498 | 0.02556843 | 0.13806952 |
| FARS2     | 308.171871 | 0.569961   | 0.02565078 | 0.13846557 |
| IL12RB1   | 63.6630678 | 1.26176827 | 0.02570601 | 0.13871496 |

|           |            |            |            |            |
|-----------|------------|------------|------------|------------|
| SCN2B     | 477.14748  | 1.81299843 | 0.02575838 | 0.13894873 |
| ALB       | 22.2603861 | -1.5947434 | 0.02577108 | 0.13896555 |
| CBX3P2    | 48.2902561 | 1.25080696 | 0.02580146 | 0.13896555 |
| FEM1B     | 2844.80358 | -0.6075755 | 0.02581577 | 0.13896555 |
| KRTAP5-7  | 10.6380022 | -1.3257052 | 0.02578456 | 0.13896555 |
| MIOS      | 599.056645 | 0.36062398 | 0.02580812 | 0.13896555 |
| PSMA6     | 975.505719 | -0.4745068 | 0.02581113 | 0.13896555 |
| ME2       | 1083.97426 | -0.8021605 | 0.02589615 | 0.13934943 |
| LINC00311 | 12.6824216 | 1.80885043 | 0.02601113 | 0.13991911 |
| HIST2H2AC | 661.757307 | -0.5646789 | 0.02608446 | 0.14023398 |
| ZNF433    | 203.416717 | -0.9217537 | 0.02608792 | 0.14023398 |
| SAP18     | 2170.33789 | -0.7661203 | 0.02611545 | 0.14033285 |
| NPIP3     | 248.203671 | -0.8870136 | 0.02615059 | 0.14047257 |
| CDC42SE2  | 1161.35795 | -0.6061718 | 0.02616214 | 0.1404855  |
| CCDC86    | 204.106214 | -0.8451507 | 0.02617303 | 0.14049486 |
| TNFSF9    | 17.953004  | -1.6991761 | 0.0262229  | 0.1407134  |
| MXRA5     | 3509.22913 | 1.65456395 | 0.02625387 | 0.1408304  |
| CLASP2    | 1723.49202 | 0.71944771 | 0.02630847 | 0.14106118 |
| TRIP6     | 1375.72532 | 0.38734034 | 0.02631526 | 0.14106118 |
| MC1R      | 117.118705 | 1.22310704 | 0.02632497 | 0.14106402 |
| ELOVL7    | 115.169871 | -1.8009454 | 0.02634619 | 0.1411285  |
| ARHGAP22  | 453.420211 | 1.50270231 | 0.02638785 | 0.14126187 |
| FAM114A1  | 2026.94714 | 0.68843677 | 0.02638948 | 0.14126187 |
| ZNF511    | 202.232809 | -0.5508103 | 0.02641882 | 0.14136965 |
| FCER1A    | 50.9246948 | 1.79704336 | 0.02647933 | 0.14164412 |
| RBM39     | 5739.08905 | -0.3967513 | 0.02657225 | 0.14209173 |
| RTF1      | 1308.87524 | -0.4602937 | 0.02659845 | 0.1421823  |
| DDX56     | 1000.75019 | 0.54203149 | 0.02662475 | 0.14222392 |
| ZNF662    | 560.689077 | 0.73673681 | 0.02661898 | 0.14222392 |
| ZFYVE19   | 289.020374 | -0.529427  | 0.02674511 | 0.14281721 |
| GLT1D1    | 127.653823 | -1.3936447 | 0.02675824 | 0.14283768 |
| FAM53B    | 1805.97046 | 0.61995069 | 0.02680734 | 0.14285161 |
| GLCE      | 3680.98538 | -1.1612153 | 0.02679011 | 0.14285161 |
| MAT2A     | 2669.60473 | -0.4692981 | 0.02680471 | 0.14285161 |
| NEIL1     | 238.690493 | 1.0080532  | 0.026783   | 0.14285161 |
| PARVA     | 3665.42567 | 0.91412333 | 0.02678374 | 0.14285161 |
| MCEE      | 99.044786  | 1.12439299 | 0.02682681 | 0.14290579 |
| LINC00663 | 151.952876 | 0.71019804 | 0.02687666 | 0.14297302 |
| LINC01001 | 15.8492917 | -1.4325521 | 0.02685988 | 0.14297302 |
| NR4A1     | 3384.80128 | -1.7562049 | 0.02687595 | 0.14297302 |
| SNRPC     | 551.335576 | -0.6845339 | 0.02687573 | 0.14297302 |
| DTX3L     | 1426.49876 | -0.4456164 | 0.02690317 | 0.1430645  |
| CLEC11A   | 423.450409 | 1.5115196  | 0.02695042 | 0.14316419 |
| DNAH1     | 1874.31632 | 0.77518855 | 0.02695686 | 0.14316419 |
| HIP1      | 1506.71176 | 1.02326728 | 0.02694778 | 0.14316419 |
| PPM1B     | 1267.85638 | 0.48210653 | 0.02695919 | 0.14316419 |
| CHORDC1   | 477.2183   | -0.4801034 | 0.02704651 | 0.14357828 |
| MIB1      | 3815.40341 | -0.7135999 | 0.02708989 | 0.14362288 |
| MMP24-AS1 | 551.860775 | -0.6336878 | 0.02709164 | 0.14362288 |
| SLIRP     | 283.639586 | -0.6617757 | 0.02709231 | 0.14362288 |

|             |            |            |            |            |
|-------------|------------|------------|------------|------------|
| TBC1D22A    | 676.028481 | -0.3934981 | 0.02707324 | 0.14362288 |
| IQGAP1      | 10129.1257 | -0.5802671 | 0.02715435 | 0.14390211 |
| PAK2        | 2472.92209 | -0.4097508 | 0.02720361 | 0.14411348 |
| TRPV1       | 292.989097 | 0.63164928 | 0.02723705 | 0.1442409  |
| TSPYL2      | 3746.62122 | -0.703477  | 0.02725095 | 0.14426476 |
| ACTN4       | 5699.94912 | -0.5813057 | 0.02727964 | 0.14436688 |
| BCR         | 1827.40284 | -1.1067623 | 0.02733728 | 0.14452821 |
| GSTP1       | 4059.30923 | -0.4363979 | 0.02733042 | 0.14452821 |
| OSBPL7      | 362.822408 | 0.44376701 | 0.02733834 | 0.14452821 |
| TMEM102     | 33.5136755 | 1.42538828 | 0.02735549 | 0.1445691  |
| SLC16A1-AS1 | 91.9476878 | 0.83982228 | 0.02739869 | 0.14474762 |
| SGK494      | 171.706433 | 0.84950059 | 0.02745125 | 0.14494863 |
| SLC29A3     | 153.278382 | 1.18648064 | 0.02745561 | 0.14494863 |
| CASZ1       | 131.488619 | -1.3014275 | 0.02747904 | 0.14495046 |
| FLJ27354    | 11.6726423 | 1.4775544  | 0.02748261 | 0.14495046 |
| SHCBP1      | 63.6298373 | 1.21087751 | 0.02748426 | 0.14495046 |
| EXTL2       | 1145.85548 | 0.86662326 | 0.02755932 | 0.14529643 |
| ATP5SL      | 327.197142 | -0.5893054 | 0.02760999 | 0.14546374 |
| IDS         | 3860.11925 | -0.7821205 | 0.02760726 | 0.14546374 |
| APEX1       | 1426.67182 | -0.8267287 | 0.02764727 | 0.14553122 |
| IST1        | 2464.28215 | 0.51265423 | 0.02765316 | 0.14553122 |
| SRL         | 63.0323175 | 1.63960403 | 0.02766069 | 0.14553122 |
| SURF2       | 78.9717721 | -0.9550634 | 0.02764133 | 0.14553122 |
| SFXN4       | 224.195159 | 0.56750824 | 0.02771213 | 0.14575198 |
| C16orf96    | 11.5186669 | 1.191441   | 0.02777597 | 0.14593783 |
| PLS1        | 335.366284 | 1.65755908 | 0.02777056 | 0.14593783 |
| TMEM86A     | 316.48622  | 0.74826623 | 0.02776149 | 0.14593783 |
| SDCBP       | 5652.13052 | -0.7030466 | 0.02781756 | 0.14610636 |
| CMAS        | 560.037334 | -0.8677175 | 0.02784944 | 0.14622386 |
| NGEF        | 71.0529958 | -0.9942624 | 0.02788881 | 0.14633055 |
| THAP3       | 157.831466 | 0.6654799  | 0.02788109 | 0.14633055 |
| ANKRD11     | 2542.36676 | 0.67487229 | 0.02793286 | 0.14636332 |
| ANKRD44     | 1932.83318 | 0.98757896 | 0.02790866 | 0.14636332 |
| KIAA1045    | 23.0139191 | 1.63131932 | 0.02794269 | 0.14636332 |
| MBTPS2      | 664.534636 | -0.7776852 | 0.02794202 | 0.14636332 |
| SHISA4      | 304.332294 | -0.8935187 | 0.02793964 | 0.14636332 |
| TMEM109     | 1905.23299 | 0.37904257 | 0.02796081 | 0.1464083  |
| AK1         | 629.663056 | 1.09485287 | 0.02798247 | 0.1464718  |
| MIR4697HG   | 170.13201  | -1.1390666 | 0.02799645 | 0.14649506 |
| SPRYD3      | 1398.4397  | -0.8030437 | 0.02804056 | 0.14667118 |
| TBCA        | 869.938324 | -0.8493696 | 0.0280492  | 0.14667118 |
| FDFT1       | 942.465847 | -0.6504186 | 0.02807131 | 0.14673684 |
| TCAIM       | 667.72516  | 0.5313928  | 0.02808871 | 0.14677786 |
| LOC1005075  | 11.2144095 | 1.42974325 | 0.02809984 | 0.14678608 |
| NDUFA11     | 879.827818 | -0.5792592 | 0.02812081 | 0.14683177 |
| ORC4        | 787.849396 | -0.5683095 | 0.0281277  | 0.14683177 |
| JPH3        | 7.38489561 | -1.8949926 | 0.02814286 | 0.14686102 |
| GNA14       | 101.302749 | 1.13277087 | 0.02818098 | 0.14696007 |
| SKIL        | 4304.45716 | 0.50098727 | 0.02818071 | 0.14696007 |
| RCHY1       | 476.71014  | -0.4214584 | 0.0282049  | 0.1470349  |

|            |            |            |            |            |
|------------|------------|------------|------------|------------|
| NBPF15     | 591.560426 | 0.62281428 | 0.02822799 | 0.14704269 |
| NDUFV1     | 1552.3066  | 0.461405   | 0.02821728 | 0.14704269 |
| ODF3B      | 40.82419   | -1.4445416 | 0.02823511 | 0.14704269 |
| ZC3H12D    | 153.194264 | 1.13558249 | 0.028245   | 0.14704434 |
| FOXO3      | 4768.73675 | 0.88250927 | 0.02826683 | 0.14705837 |
| LOC1005064 | 222.631561 | 1.73634506 | 0.02826331 | 0.14705837 |
| PCNX       | 3966.41786 | -0.514653  | 0.02829164 | 0.14713761 |
| CNOT11     | 634.430964 | -0.3414221 | 0.02830445 | 0.1471544  |
| PLEKHF1    | 192.980432 | -1.5814329 | 0.02835047 | 0.14724814 |
| POLR2J4    | 296.747935 | 0.62081931 | 0.02835123 | 0.14724814 |
| SLC22A4    | 74.4005878 | 0.96506964 | 0.02833709 | 0.14724814 |
| PAIP2      | 1644.32646 | -0.6345945 | 0.02837173 | 0.14730478 |
| DUSP16     | 1118.44004 | -0.765786  | 0.02838211 | 0.1473089  |
| KCNMB1     | 62.2678567 | 1.28061158 | 0.02839661 | 0.1473344  |
| ADAM33     | 1224.0868  | -1.539748  | 0.0284395  | 0.1474573  |
| PTPRA      | 2309.53668 | -0.6148792 | 0.02843414 | 0.1474573  |
| LEMD2      | 948.136256 | 0.43588837 | 0.02845772 | 0.14750203 |
| COX10-AS1  | 142.205838 | 0.77253286 | 0.02846808 | 0.14750596 |
| SEC16B     | 218.555823 | 0.91405423 | 0.02852062 | 0.14768611 |
| TRMT1L     | 806.713093 | -0.5852196 | 0.02852208 | 0.14768611 |
| LOC1001291 | 8.4509222  | -1.8845897 | 0.0285626  | 0.1478461  |
| LOC339803  | 182.308129 | 0.54159549 | 0.02863497 | 0.14812087 |
| SYPL2      | 63.1913027 | 1.70316196 | 0.02862889 | 0.14812087 |
| CTR9       | 1415.2306  | -0.5467562 | 0.02868251 | 0.14829534 |
| HIST1H1E   | 1941.00358 | 0.51309089 | 0.028688   | 0.14829534 |
| ARMC7      | 200.704176 | -0.8402428 | 0.028741   | 0.14831979 |
| CCDC88A    | 2751.58616 | 0.64076091 | 0.02871847 | 0.14831979 |
| KHSRP      | 1713.80882 | -0.3893185 | 0.02873511 | 0.14831979 |
| PGD        | 961.104208 | -0.7049455 | 0.02873168 | 0.14831979 |
| SYN1       | 28.2023117 | -1.1708581 | 0.02872088 | 0.14831979 |
| LINC00852  | 57.7301915 | 0.8609684  | 0.02877602 | 0.14841283 |
| XPNPEP2    | 18.2194448 | 1.67516724 | 0.02877835 | 0.14841283 |
| C2orf81    | 60.0952009 | 0.94315944 | 0.0288834  | 0.14846503 |
| CCDC115    | 438.947652 | 0.41544973 | 0.02887285 | 0.14846503 |
| CLEC5A     | 479.860346 | 1.63468142 | 0.02882419 | 0.14846503 |
| FSCN1      | 1761.43817 | 0.61602683 | 0.02887147 | 0.14846503 |
| GPR98      | 11.0527119 | -1.560419  | 0.02886748 | 0.14846503 |
| IRF2       | 573.053367 | -0.5937704 | 0.02880811 | 0.14846503 |
| LAMP3      | 18.8101669 | -1.1198695 | 0.02880926 | 0.14846503 |
| MIR497HG   | 231.77805  | 1.38723521 | 0.02888551 | 0.14846503 |
| RANBP1     | 475.819926 | -0.6918149 | 0.0288593  | 0.14846503 |
| ROR1       | 821.319069 | 1.61723291 | 0.02888585 | 0.14846503 |
| SNRPD2     | 1065.38694 | -0.6404091 | 0.02889478 | 0.14846503 |
| DIAPH1     | 1655.82678 | -1.0540676 | 0.02895087 | 0.1486254  |
| PHLDB2     | 11557.6095 | -0.7038945 | 0.02895501 | 0.1486254  |
| TCF3       | 794.701496 | -0.4062426 | 0.02894042 | 0.1486254  |
| ZNF581     | 223.974705 | -0.5695317 | 0.02897823 | 0.14869489 |
| ARHGAP31   | 6470.93009 | 1.12759388 | 0.02900271 | 0.14877081 |
| RRP7B      | 213.254868 | 0.49947505 | 0.02902838 | 0.14885282 |
| PDXP       | 151.186816 | -0.8805352 | 0.02904065 | 0.14886603 |

|            |            |            |            |            |
|------------|------------|------------|------------|------------|
| CARNS1     | 8.91061406 | 1.50155008 | 0.02912663 | 0.14912712 |
| PEPD       | 836.616795 | -0.5012744 | 0.0291167  | 0.14912712 |
| PRKD3      | 2764.14672 | 0.5241652  | 0.02913749 | 0.14912712 |
| SMG1P7     | 70.9191836 | 1.19142222 | 0.02910456 | 0.14912712 |
| TEX21P     | 10.366418  | 1.61352    | 0.02914012 | 0.14912712 |
| MTO1       | 493.709362 | 0.4682437  | 0.0291675  | 0.14916787 |
| RCSD1      | 1875.26646 | 0.8988876  | 0.02916405 | 0.14916787 |
| SLC17A7    | 18.9421718 | 1.73804104 | 0.02918177 | 0.1491912  |
| ENKD1      | 255.58859  | 0.77148109 | 0.02919542 | 0.14921134 |
| NCL        | 5384.24617 | -0.6338622 | 0.02923433 | 0.14931082 |
| RASSF1     | 388.208639 | 0.82945958 | 0.02922535 | 0.14931082 |
| ZNF577     | 557.659425 | 0.58075513 | 0.02927682 | 0.14947815 |
| RNF19B     | 436.402849 | -0.9605685 | 0.02931496 | 0.14962317 |
| HIST1H4H   | 591.960057 | 0.67557074 | 0.02934104 | 0.14968972 |
| SPN        | 207.753686 | 1.37321476 | 0.02934749 | 0.14968972 |
| PRR14      | 318.916188 | -0.5945849 | 0.02940986 | 0.14995809 |
| KIF3C      | 258.470171 | 0.9431338  | 0.02942499 | 0.14998542 |
| HAUS2      | 588.826102 | -0.5612181 | 0.02946215 | 0.15012506 |
| LOC1001333 | 78.3409766 | -1.039185  | 0.0295112  | 0.15032514 |
| ADRB1      | 353.138484 | -1.5978852 | 0.02954358 | 0.15044019 |
| UBE3B      | 1266.58509 | -0.4898471 | 0.02955413 | 0.15044405 |
| MAGI1      | 842.195195 | 0.81243266 | 0.02957505 | 0.15050065 |
| HCCAT3     | 32.9658959 | 1.14517351 | 0.02962184 | 0.15068887 |
| KIAA1210   | 318.232463 | 1.73280723 | 0.02970271 | 0.15105022 |
| LAMP2      | 3622.32402 | -0.63392   | 0.02973926 | 0.15118607 |
| CCDC25     | 846.8412   | -0.5636708 | 0.02975994 | 0.15124115 |
| CDKN1B     | 1773.39673 | -0.7658984 | 0.02978872 | 0.15133733 |
| PDLIM7     | 1497.99013 | -1.0351886 | 0.02979946 | 0.15134185 |
| NFATC3     | 3089.00347 | 0.54785619 | 0.02990264 | 0.15178536 |
| PEMT       | 189.278315 | 0.79681941 | 0.02990655 | 0.15178536 |
| LONP1      | 1245.47025 | -0.5168732 | 0.02994854 | 0.15189815 |
| PTRH2      | 146.686279 | -0.7663625 | 0.02994182 | 0.15189815 |
| SLC12A4    | 1777.97401 | 0.95835812 | 0.02997856 | 0.15195003 |
| ZDHHC21    | 1409.99137 | 0.59457422 | 0.02997496 | 0.15195003 |
| PRKD2      | 608.381749 | -0.6621826 | 0.0301072  | 0.15255174 |
| MRC2       | 25610.1756 | 0.85575544 | 0.03018367 | 0.15284538 |
| MRPS2      | 311.64565  | -0.5402504 | 0.03020338 | 0.15284538 |
| PPP1R3G    | 18.0922132 | 1.22859367 | 0.03020495 | 0.15284538 |
| TRAK2      | 1373.8468  | 0.42436795 | 0.03020483 | 0.15284538 |
| ANK2       | 4453.66848 | 1.59286803 | 0.03022703 | 0.15290676 |
| CCDC88C    | 624.519698 | 1.13809116 | 0.03025386 | 0.15294177 |
| LTBP4      | 7869.15635 | -0.5986702 | 0.03024931 | 0.15294177 |
| COQ10B     | 476.895275 | -0.7053773 | 0.03035103 | 0.15333684 |
| HIST1H4J   | 16.2311714 | 1.15113088 | 0.03035197 | 0.15333684 |
| TPPP3      | 95.5238237 | -1.4160232 | 0.03045422 | 0.15380283 |
| EIF5A      | 2443.93631 | -0.5410644 | 0.03052045 | 0.15386527 |
| HPS1       | 1079.50463 | -0.380601  | 0.03052668 | 0.15386527 |
| LINC00882  | 20.0871602 | 0.95031598 | 0.03050161 | 0.15386527 |
| LOC1005062 | 29.3939753 | 1.35004121 | 0.03051174 | 0.15386527 |
| RIN2       | 1470.2049  | 0.6798335  | 0.03052242 | 0.15386527 |

|            |            |            |            |            |
|------------|------------|------------|------------|------------|
| TIMP2      | 11022.57   | 0.62190918 | 0.03051507 | 0.15386527 |
| SLAIN1     | 125.638691 | -1.3272661 | 0.03063767 | 0.15437409 |
| OSBP       | 1656.54154 | -0.4495953 | 0.03066862 | 0.15447934 |
| C9orf85    | 107.384039 | 0.51469914 | 0.03069726 | 0.15457294 |
| ZSCAN22    | 139.292979 | -0.6406518 | 0.03071644 | 0.15461884 |
| PMM1       | 216.740173 | -0.868133  | 0.03078128 | 0.15489447 |
| EIF3D      | 1901.01742 | -0.5775351 | 0.03082311 | 0.15505417 |
| IL34       | 964.090738 | 0.95705379 | 0.03085927 | 0.1551345  |
| SUZ12      | 957.214437 | -0.579703  | 0.03085015 | 0.1551345  |
| RPS15      | 4214.99381 | -0.4818487 | 0.03087751 | 0.1551754  |
| SLC35C1    | 470.942683 | -0.4353078 | 0.03091574 | 0.15531673 |
| EIF5A2     | 314.195431 | 0.64558323 | 0.0309801  | 0.1553613  |
| GATA2      | 84.7266732 | 1.55388272 | 0.03101563 | 0.1553613  |
| GPRASP1    | 2001.18036 | 0.84292272 | 0.03101403 | 0.1553613  |
| HMGA1      | 304.356757 | -1.0944121 | 0.03094962 | 0.1553613  |
| LOC1001312 | 13.2281174 | 1.75945525 | 0.03099968 | 0.1553613  |
| MAGOH2     | 9.41533156 | 1.55221724 | 0.03100314 | 0.1553613  |
| RASAL2     | 2462.17332 | 0.73502488 | 0.03100512 | 0.1553613  |
| SET        | 4789.87074 | -0.5129984 | 0.03098685 | 0.1553613  |
| UBXN4      | 3000.62337 | -0.3424413 | 0.03096942 | 0.1553613  |
| CDIP1      | 480.001518 | 0.87618444 | 0.03102952 | 0.15538022 |
| SMARCB1    | 502.961376 | -0.6892039 | 0.03111736 | 0.15576931 |
| DNAJB5     | 498.077603 | -1.0495387 | 0.03118648 | 0.15606446 |
| NELFCD     | 972.215802 | -0.6351633 | 0.03123962 | 0.15627948 |
| HLA-DRA    | 1123.25279 | 1.77949338 | 0.03128307 | 0.1564459  |
| NFIA       | 7900.71781 | 0.84558154 | 0.03131049 | 0.15653209 |
| KCNIP3     | 10.7239212 | 1.78144984 | 0.03135187 | 0.15668793 |
| CAND2      | 285.958457 | 0.93160667 | 0.03137117 | 0.15672253 |
| HCN3       | 144.811341 | 1.04121021 | 0.03137919 | 0.15672253 |
| MYL6       | 9091.89801 | -0.6287297 | 0.03145299 | 0.15683616 |
| NAA16      | 796.936641 | -0.587339  | 0.03144568 | 0.15683616 |
| NP1PB5     | 81.4701332 | -0.9513061 | 0.03143482 | 0.15683616 |
| PCED1B-AS1 | 65.5488417 | 1.26949422 | 0.03144661 | 0.15683616 |
| RPUSD3     | 164.122945 | 0.49338566 | 0.03143121 | 0.15683616 |
| DBNL       | 1794.10225 | 0.57101797 | 0.03149991 | 0.15696825 |
| LUZP1      | 2026.5645  | 0.74761713 | 0.03149822 | 0.15696825 |
| PGM2       | 497.443027 | 0.38194751 | 0.03151445 | 0.15698976 |
| MAPK8IP1   | 257.852231 | -1.1540818 | 0.03168747 | 0.1578005  |
| BCAS4      | 90.1018572 | -1.3691625 | 0.0317345  | 0.1579835  |
| CCDC147    | 15.2937551 | -1.194867  | 0.03174843 | 0.15800167 |
| RPL34-AS1  | 13.136738  | 1.51881732 | 0.03176683 | 0.15804203 |
| LDHD       | 98.0089679 | 1.61800111 | 0.03178613 | 0.15808686 |
| RGS5       | 5401.56365 | 1.07387709 | 0.03180418 | 0.15812543 |
| RTN4R      | 36.1711849 | -1.4507659 | 0.03182962 | 0.158155   |
| ZNF747     | 351.578939 | 0.62147388 | 0.03183071 | 0.158155   |
| RAB11FIP1  | 1525.41871 | -0.8323197 | 0.03190553 | 0.15847546 |
| CDH23      | 7250.19103 | 1.67337451 | 0.03192712 | 0.15853146 |
| FAM198B    | 1061.17732 | 0.93256688 | 0.03194413 | 0.15856467 |
| GPR34      | 1345.90169 | 1.00144269 | 0.03201189 | 0.15884971 |
| ACPP       | 64.5171983 | 1.33928972 | 0.03205188 | 0.1589968  |

|            |            |            |            |            |
|------------|------------|------------|------------|------------|
| STOML2     | 785.029068 | -0.5876533 | 0.03207142 | 0.15904235 |
| TMEM79     | 61.3733905 | 0.93368884 | 0.03212912 | 0.15927709 |
| TAF10      | 467.98628  | -0.7762534 | 0.03214114 | 0.15928525 |
| C16orf13   | 318.460627 | -0.446676  | 0.03222793 | 0.15962966 |
| MYL12B     | 5343.81495 | -0.6965439 | 0.03223645 | 0.15962966 |
| PES1       | 708.047853 | -0.8102523 | 0.0322418  | 0.15962966 |
| SLC10A7    | 229.559911 | 0.44232499 | 0.03229028 | 0.15981818 |
| ZNF101     | 123.545661 | -0.5972879 | 0.03236248 | 0.16012394 |
| ANKRD24    | 56.9491029 | 1.10429504 | 0.03242465 | 0.16037989 |
| RBBP7      | 1952.63852 | -0.6970849 | 0.03245589 | 0.16048271 |
| SPATA5L1   | 162.758329 | -0.5934579 | 0.03249375 | 0.16061821 |
| FAM221A    | 164.211308 | 0.94421218 | 0.03255407 | 0.16081291 |
| MAGIX      | 53.1969876 | 1.50529145 | 0.03254703 | 0.16081291 |
| C1orf213   | 98.1476163 | 1.06525005 | 0.03256786 | 0.16082932 |
| UBAC1      | 581.509036 | 0.53086928 | 0.03258208 | 0.16084787 |
| ADAMTS17   | 554.187519 | -1.1483254 | 0.03266546 | 0.16120768 |
| ZBTB24     | 746.363278 | 0.6016008  | 0.03271184 | 0.16138474 |
| COLQ       | 198.233002 | 0.69621734 | 0.03275868 | 0.16150102 |
| FTL        | 22811.6316 | -1.1130774 | 0.03277746 | 0.16150102 |
| LAG3       | 11.1220837 | -1.1649651 | 0.0327732  | 0.16150102 |
| SLC6A6     | 2193.93917 | 1.3218689  | 0.03274885 | 0.16150102 |
| GIMAP2     | 188.379521 | 0.98103468 | 0.03285498 | 0.16182562 |
| PIK3R6     | 49.5071404 | 0.98950246 | 0.03286441 | 0.16182562 |
| PHF10      | 564.287371 | -0.7607133 | 0.03292109 | 0.16205278 |
| CENPL      | 109.487104 | 0.64954077 | 0.03293744 | 0.1620813  |
| CEBPA      | 281.333553 | 1.34179759 | 0.03295453 | 0.16211347 |
| CTNBL1     | 507.309502 | -0.626254  | 0.03297953 | 0.16218454 |
| MFSD2A     | 21.7262997 | -1.2267915 | 0.03303229 | 0.16239202 |
| FAM122B    | 572.375678 | -0.7171939 | 0.03313262 | 0.16283316 |
| LINC01114  | 21.139701  | 1.83519986 | 0.03315952 | 0.16291326 |
| CCT2       | 1533.83577 | -0.4668691 | 0.03318932 | 0.16295544 |
| PDGFA      | 366.989126 | -1.0459494 | 0.03318069 | 0.16295544 |
| BTNL9      | 806.631853 | -1.4217403 | 0.03333081 | 0.16359785 |
| NME8       | 12.6214228 | 1.42504054 | 0.03335888 | 0.16368331 |
| RRAGD      | 173.522775 | -1.4669657 | 0.03339696 | 0.16381784 |
| LOC1002880 | 222.641155 | 0.67072389 | 0.03341422 | 0.16385018 |
| CD82       | 137.234709 | -0.9016466 | 0.03343291 | 0.16388952 |
| ALOX12P2   | 89.722965  | -1.7841395 | 0.03350379 | 0.16412856 |
| NBL1       | 106.475606 | -1.1034798 | 0.03351372 | 0.16412856 |
| TIMM8A     | 83.9304228 | -0.6392196 | 0.03350769 | 0.16412856 |
| TNFRSF10D  | 504.283371 | -1.4690546 | 0.03353846 | 0.16419736 |
| IGF2-AS    | 40.989406  | 1.53863927 | 0.03359045 | 0.16435861 |
| SSBP3      | 844.882283 | -0.7030188 | 0.03359279 | 0.16435861 |
| ITGAE      | 79.4284417 | 0.86253839 | 0.03362691 | 0.16447318 |
| CHN2       | 567.649541 | 1.47966464 | 0.0337625  | 0.16486956 |
| FAM155A    | 70.3857346 | 1.45762182 | 0.03374854 | 0.16486956 |
| KCNK15     | 94.9062023 | -1.0483923 | 0.03377325 | 0.16486956 |
| LINC00467  | 52.9038473 | -0.6436723 | 0.03378307 | 0.16486956 |
| LOC286367  | 58.1361466 | 0.74502767 | 0.03373193 | 0.16486956 |
| PRR34      | 12.2144349 | 1.44545576 | 0.0337822  | 0.16486956 |

|            |            |            |            |            |
|------------|------------|------------|------------|------------|
| PTX3       | 19.0064259 | -1.6703849 | 0.03376118 | 0.16486956 |
| DIMT1      | 267.356846 | -0.3258008 | 0.03380574 | 0.16487544 |
| STK31      | 51.6174387 | 1.15911544 | 0.03379779 | 0.16487544 |
| PUM2       | 3633.99569 | -0.463855  | 0.0338368  | 0.16492218 |
| TMEM127    | 1532.24077 | -0.2945945 | 0.03383317 | 0.16492218 |
| ATF2       | 2419.12471 | -0.6213767 | 0.03389939 | 0.16504766 |
| HRAS       | 278.577695 | -0.4241201 | 0.03387725 | 0.16504766 |
| SULT4A1    | 58.0502833 | -1.4906939 | 0.03390551 | 0.16504766 |
| THRA       | 1053.09835 | 0.57450227 | 0.03390146 | 0.16504766 |
| HPN        | 31.7118241 | -1.3423815 | 0.03392859 | 0.16505541 |
| HSPA2      | 285.347072 | -1.307716  | 0.03392524 | 0.16505541 |
| SLC25A42   | 250.577245 | 0.71266114 | 0.03395168 | 0.16511543 |
| B3GNT5     | 287.297835 | -0.8635248 | 0.0339899  | 0.16515057 |
| PPM1K      | 955.455242 | 0.72959282 | 0.03398824 | 0.16515057 |
| TCEAL4     | 1595.01321 | -1.0252578 | 0.03399115 | 0.16515057 |
| BLNK       | 389.173316 | 0.99190446 | 0.03402151 | 0.1652458  |
| NDUFAF2    | 160.573187 | -0.7991336 | 0.03407688 | 0.1654624  |
| LACE1      | 102.795954 | 0.70335296 | 0.03409183 | 0.16548271 |
| RAC3       | 53.6341996 | 1.4444895  | 0.03410296 | 0.16548444 |
| FN3KRP     | 487.620086 | -0.4806963 | 0.03411719 | 0.16550122 |
| TAS2R31    | 126.5386   | 0.56158282 | 0.03414361 | 0.16557711 |
| GLS2       | 19.5930228 | -1.4713381 | 0.03417311 | 0.16566789 |
| MRPS24     | 21.8611947 | -1.1113622 | 0.03423592 | 0.16581537 |
| PIANP      | 11.7408666 | -1.7914219 | 0.03421435 | 0.16581537 |
| ZBTB2      | 313.69557  | -0.5623797 | 0.03423456 | 0.16581537 |
| ANKRD12    | 3649.53614 | -0.5024105 | 0.03427092 | 0.16592622 |
| IFT20      | 354.67076  | 0.58408191 | 0.0342804  | 0.16592622 |
| CLSTN3     | 826.191149 | -0.6870138 | 0.03430625 | 0.16599902 |
| TM7SF2     | 237.755053 | -0.9111917 | 0.03433531 | 0.16608734 |
| PCLO       | 234.129536 | -1.3304322 | 0.03436505 | 0.16617888 |
| AFG3L1P    | 356.819927 | 0.69167478 | 0.03439394 | 0.16625501 |
| NAPG       | 1496.2954  | -0.9121722 | 0.03440244 | 0.16625501 |
| LINC01232  | 19.2989868 | 1.40226324 | 0.03442691 | 0.16632096 |
| SH3GL1     | 1135.76654 | -0.5659755 | 0.03446021 | 0.1664295  |
| LOC654841  | 27.3788438 | 1.04609403 | 0.03447386 | 0.1664431  |
| FRMD4B     | 970.515732 | 0.75736358 | 0.03449329 | 0.1664846  |
| ADC        | 128.187872 | 1.01887921 | 0.03451155 | 0.16651312 |
| ALDH3B1    | 371.858095 | 0.87466943 | 0.03452088 | 0.16651312 |
| TUBA4A     | 129.509144 | -1.3648378 | 0.03454639 | 0.16653158 |
| ZNF561     | 1076.23145 | -0.5954767 | 0.03453993 | 0.16653158 |
| CROCCP2    | 379.468531 | 0.97394278 | 0.03464076 | 0.16688179 |
| CYP2U1     | 927.042413 | 0.90998492 | 0.03463773 | 0.16688179 |
| BIN1       | 964.263755 | 0.79731667 | 0.03473687 | 0.16718752 |
| OMA1       | 393.487735 | 0.57840057 | 0.0347261  | 0.16718752 |
| ST6GALNAC4 | 346.543823 | -0.7977081 | 0.03473341 | 0.16718752 |
| GNB1       | 5082.46163 | -0.670773  | 0.03474939 | 0.16719541 |
| PET117     | 76.742868  | -0.6272317 | 0.03476126 | 0.16720012 |
| MAGT1      | 2709.09291 | -0.5580095 | 0.0348096  | 0.16738025 |
| AIF1L      | 136.279137 | 1.45804777 | 0.03484552 | 0.16744816 |
| EEF1DP3    | 14.6296076 | 1.32182706 | 0.03483522 | 0.16744816 |



|           |            |            |            |            |
|-----------|------------|------------|------------|------------|
| NARS      | 2288.85189 | -0.4577523 | 0.03486499 | 0.1674893  |
| OCIAD2    | 73.8768284 | -1.478066  | 0.03488167 | 0.16751708 |
| FAM21C    | 703.757949 | -0.4419219 | 0.03494557 | 0.16761434 |
| KRT18     | 2599.65566 | -1.7836739 | 0.03493577 | 0.16761434 |
| MYRIP     | 111.227116 | 1.55449416 | 0.03494279 | 0.16761434 |
| TSEN2     | 277.99601  | 0.54369927 | 0.03493467 | 0.16761434 |
| ZDHHC7    | 1343.07508 | 0.50251632 | 0.03497678 | 0.16771169 |
| CCDC58    | 88.8041774 | -0.7110377 | 0.03499177 | 0.16773123 |
| EFCAB1    | 31.1474691 | 1.59449382 | 0.03500597 | 0.16774267 |
| MRO       | 263.03472  | -1.2330267 | 0.03501599 | 0.16774267 |
| TCF25     | 1791.45573 | 0.52716061 | 0.0350961  | 0.16807399 |
| KCTD10    | 1593.77176 | -0.8846915 | 0.03515727 | 0.16831446 |
| RAD54B    | 65.7187122 | 1.16354201 | 0.0351835  | 0.16838759 |
| NR2F2-AS1 | 109.575638 | 1.35174226 | 0.03540135 | 0.16937744 |
| GBE1      | 720.482404 | -1.0059966 | 0.03544467 | 0.16947914 |
| LINC00341 | 143.622781 | 0.92932622 | 0.03543564 | 0.16947914 |
| CLIP1     | 3322.85027 | -0.6942187 | 0.03548047 | 0.16959753 |
| PIK3R2    | 1088.35165 | -0.4956606 | 0.03550338 | 0.16965423 |
| LOXL2     | 331.174015 | -1.2233538 | 0.03555435 | 0.16984497 |
| BRIX1     | 292.940116 | -0.6610903 | 0.0355681  | 0.16985787 |
| NR3C2     | 1631.52923 | -1.3861587 | 0.03563368 | 0.17011818 |
| DOK1      | 423.122181 | 0.66347893 | 0.0356782  | 0.1702778  |
| ZNF675    | 254.662758 | -0.4218515 | 0.03573886 | 0.17051433 |
| C15orf52  | 622.776946 | -1.0663514 | 0.03577891 | 0.17054651 |
| COA4      | 383.176294 | -0.4692429 | 0.03577271 | 0.17054651 |
| MYLK      | 3507.54419 | 1.42402812 | 0.03576027 | 0.17054651 |
| SLC24A5   | 32.6874641 | 1.60866721 | 0.03583416 | 0.17075687 |
| PCYT1A    | 602.652915 | -0.4118901 | 0.03590396 | 0.17103645 |
| RBM5      | 3003.3701  | 0.53441419 | 0.0359408  | 0.17115887 |
| MNT       | 536.322484 | -0.6372177 | 0.03595598 | 0.17117811 |
| S100A4    | 240.879425 | 1.12713663 | 0.03598041 | 0.17124134 |
| AAAS      | 852.679113 | -0.650725  | 0.03599403 | 0.17125313 |
| AIMP2     | 297.528173 | -0.6156282 | 0.03607213 | 0.17148861 |
| HLA-DRB3  | 106.502529 | 1.77905763 | 0.03608591 | 0.17148861 |
| SGTA      | 842.831139 | -0.3709503 | 0.03605809 | 0.17148861 |
| ZNF141    | 560.483546 | -0.4883094 | 0.03608818 | 0.17148861 |
| MTRNR2L10 | 837.197566 | -0.9257399 | 0.03610982 | 0.17153839 |
| TSTD1     | 175.696137 | -0.7391817 | 0.03615019 | 0.17167708 |
| FOXO6     | 63.8652083 | -1.1372501 | 0.03619629 | 0.17180904 |
| RRM2B     | 1349.02521 | -0.6731175 | 0.03621153 | 0.17180904 |
| UPF3B     | 182.215266 | -0.5901448 | 0.03620071 | 0.17180904 |
| PHEX      | 46.3243926 | -1.6990764 | 0.03629987 | 0.17217502 |
| LOC374443 | 545.361    | 0.81970129 | 0.0363382  | 0.17230365 |
| PAN3      | 1719.68311 | -0.4331174 | 0.03639302 | 0.17251031 |
| PDIA3     | 6820.70217 | -0.6103037 | 0.03642245 | 0.17259656 |
| DNAH9     | 76.5988193 | 1.22009813 | 0.03644439 | 0.17264728 |
| CAMK2N1   | 656.629349 | -1.6782892 | 0.03647833 | 0.17275482 |
| ST3GAL2   | 702.710402 | 0.71347607 | 0.03650526 | 0.17282905 |
| GNAS      | 14674.9336 | -0.4668964 | 0.03655159 | 0.17289142 |
| IDI1      | 646.805227 | -0.6086136 | 0.03654648 | 0.17289142 |

|            |            |            |            |            |
|------------|------------|------------|------------|------------|
| KLF7       | 1845.49142 | 0.66651265 | 0.03656345 | 0.17289142 |
| SRM        | 575.024999 | -0.830653  | 0.03655605 | 0.17289142 |
| RAP2C      | 792.886509 | -0.6769949 | 0.03659739 | 0.17296566 |
| RND2       | 97.6156796 | -1.0261898 | 0.03660539 | 0.17296566 |
| SLC4A7     | 1706.81611 | 0.93915459 | 0.03661292 | 0.17296566 |
| EIF4B      | 15270.4258 | -0.6370996 | 0.03676537 | 0.17356282 |
| FOSL2      | 3749.32243 | -1.4252754 | 0.03677322 | 0.17356282 |
| YTHDF3     | 2375.21976 | -0.4696136 | 0.03676972 | 0.17356282 |
| ARIH2      | 1619.94339 | 0.46246509 | 0.03685606 | 0.17390041 |
| PAQR8      | 869.206916 | 1.38307814 | 0.03688684 | 0.17399219 |
| DNAJC27-AS | 106.918129 | 1.22438372 | 0.03690785 | 0.17403782 |
| FKSG29     | 16.9983559 | 1.22437888 | 0.03694883 | 0.17417762 |
| MARS       | 1388.95352 | -0.4248273 | 0.03700008 | 0.17434098 |
| PDXDC2P    | 663.50696  | 0.93551702 | 0.03700618 | 0.17434098 |
| HEYL       | 219.986231 | 1.16305645 | 0.03703218 | 0.17435982 |
| SLC37A3    | 821.473881 | 0.58505371 | 0.03703288 | 0.17435982 |
| ATP11B     | 2280.72065 | 0.31043522 | 0.0370481  | 0.17437806 |
| ZKSCAN3    | 313.11356  | 0.60180287 | 0.03706132 | 0.17438686 |
| FRAS1      | 2773.81572 | 1.52552437 | 0.03710912 | 0.17455829 |
| AFMID      | 233.642095 | -0.6881244 | 0.03713247 | 0.17456125 |
| FOXS1      | 29.9923836 | 1.4056619  | 0.03713176 | 0.17456125 |
| PTOV1-AS1  | 23.6408687 | 1.23735176 | 0.03718112 | 0.17473648 |
| CDC42EP1   | 337.471164 | 0.57449258 | 0.03719621 | 0.17475394 |
| LOC1002894 | 36.0567382 | 0.91156493 | 0.03724232 | 0.17478065 |
| MXI1       | 3371.0112  | -1.187535  | 0.0372474  | 0.17478065 |
| SLC6A17    | 82.6088228 | 1.60402783 | 0.03722072 | 0.17478065 |
| THUMPD3-A  | 279.584365 | 0.53113056 | 0.03724072 | 0.17478065 |
| DAZAP1     | 857.209496 | -0.4927145 | 0.03733695 | 0.17504047 |
| NUDT13     | 55.2038509 | 0.9159489  | 0.03731999 | 0.17504047 |
| SLC5A4     | 17.9816407 | 1.66661467 | 0.037329   | 0.17504047 |
| R3HDM4     | 573.672681 | -0.5587715 | 0.03736126 | 0.175101   |
| UBL5       | 1223.3182  | -0.7915828 | 0.0373823  | 0.17514616 |
| LOC1019293 | 22.6568802 | 1.62201424 | 0.03744879 | 0.17535072 |
| PPP2CA     | 2105.01809 | -0.6372768 | 0.03743826 | 0.17535072 |
| MAGI2-AS3  | 2920.78448 | 0.62751498 | 0.03756398 | 0.17583651 |
| DAO        | 8.15746631 | 1.79694348 | 0.03757872 | 0.17585193 |
| LAMB3      | 266.83262  | -1.5855091 | 0.03763693 | 0.1760707  |
| IRF4       | 28.8301975 | -1.0058714 | 0.03775878 | 0.17658696 |
| C16orf70   | 339.173328 | 0.41648272 | 0.03781444 | 0.17672225 |
| NUDT18     | 157.362258 | 0.80021585 | 0.03782222 | 0.17672225 |
| PLAUR      | 227.908507 | -1.3925245 | 0.03781108 | 0.17672225 |
| PVR        | 692.425924 | -0.8575691 | 0.03784605 | 0.17676477 |
| RPGRIP1L   | 525.252611 | 0.83033344 | 0.03785433 | 0.17676477 |
| NAT10      | 1061.84389 | -0.5967903 | 0.03791409 | 0.17699001 |
| MGP        | 6401.16285 | 1.19405522 | 0.03797049 | 0.17719947 |
| RAN        | 1928.87624 | -0.5317006 | 0.03816798 | 0.17806699 |
| PDXK       | 9439.71069 | 0.74998478 | 0.03820199 | 0.17817157 |
| SAMD3      | 14.8900231 | 1.44558212 | 0.03833459 | 0.17873573 |
| USPL1      | 512.760838 | -0.5002642 | 0.03839879 | 0.17898077 |
| ME3        | 253.341288 | 0.65326182 | 0.03845066 | 0.17916817 |

|            |            |            |            |            |
|------------|------------|------------|------------|------------|
| C14orf28   | 100.831794 | 0.78549038 | 0.03846775 | 0.17918114 |
| KATNA1     | 231.26458  | 0.49265889 | 0.03847677 | 0.17918114 |
| SHE        | 467.533467 | 0.38540281 | 0.03861897 | 0.17973439 |
| ZBED3      | 71.3562435 | 0.59497039 | 0.03861344 | 0.17973439 |
| ZNF445     | 1841.41639 | 0.56367494 | 0.03864803 | 0.17981516 |
| DOLK       | 359.351825 | 0.51354826 | 0.03870102 | 0.17999661 |
| ZNF680     | 658.873739 | 0.80186789 | 0.03871046 | 0.17999661 |
| MTURN      | 2011.07642 | 0.67783146 | 0.03873347 | 0.18004454 |
| RCOR2      | 7.96769846 | -1.2900096 | 0.03875593 | 0.18004454 |
| WNK1       | 10835.0688 | -0.5894537 | 0.0387462  | 0.18004454 |
| INCA1      | 14.1881423 | 1.09177913 | 0.03878966 | 0.18011507 |
| NUCKS1     | 14162.003  | -0.5225921 | 0.03879456 | 0.18011507 |
| NMNAT1     | 261.652034 | 0.89367263 | 0.03883861 | 0.18026514 |
| MED25      | 439.623699 | -0.4711238 | 0.03886346 | 0.18032599 |
| WDR44      | 763.698515 | -0.6118533 | 0.03890187 | 0.18044969 |
| LFNG       | 194.799127 | 1.36112049 | 0.03893208 | 0.18053535 |
| WDR91      | 589.917791 | 0.62997945 | 0.03894943 | 0.18056128 |
| LOC1005066 | 72.0948992 | -0.527209  | 0.03896776 | 0.1805723  |
| RASL12     | 80.9835265 | 1.39336996 | 0.03897531 | 0.1805723  |
| HNRNPA1    | 2146.05935 | -0.6301332 | 0.03900698 | 0.18061008 |
| RBPM5      | 597.658717 | -0.9748185 | 0.03900461 | 0.18061008 |
| ASAP1-IT2  | 32.5764035 | 1.27704009 | 0.03904472 | 0.18073036 |
| SFRP2      | 67751.755  | 1.58226212 | 0.03906042 | 0.18074857 |
| PITPNA     | 1929.77885 | -0.5265907 | 0.03910664 | 0.18085348 |
| ZBTB47     | 1629.77176 | 0.74891979 | 0.03910451 | 0.18085348 |
| C12orf5    | 594.113987 | -0.6741531 | 0.0391287  | 0.18090107 |
| THOC6      | 179.98231  | -0.5718876 | 0.03917946 | 0.18108123 |
| FBXO22     | 790.715205 | -0.4348993 | 0.03922931 | 0.18125711 |
| C2orf91    | 9.29538989 | 1.61502104 | 0.0392718  | 0.18138178 |
| KLK10      | 58.5416609 | -1.6635193 | 0.03927991 | 0.18138178 |
| CLPX       | 787.72677  | -0.4749118 | 0.03931025 | 0.18146738 |
| NEK10      | 19.168573  | 1.32783957 | 0.03932546 | 0.18148305 |
| P4HTM      | 527.538869 | 0.63792734 | 0.0393513  | 0.18154774 |
| VMAC       | 212.399209 | 0.66112998 | 0.03942817 | 0.18184777 |
| CYB5RL     | 133.474132 | 0.68888066 | 0.03946906 | 0.18192714 |
| ROBO4      | 439.682919 | 1.10838477 | 0.0394586  | 0.18192714 |
| C1orf115   | 283.9116   | -1.507121  | 0.03955261 | 0.18220294 |
| NPHP3      | 350.956179 | 0.5495127  | 0.0395511  | 0.18220294 |
| VMA21      | 1794.21244 | -0.5670373 | 0.03958397 | 0.18229271 |
| HSD17B10   | 582.877539 | -0.5969803 | 0.03965495 | 0.18234631 |
| 6-Sep      | 1203.56264 | -0.9904471 | 0.03962553 | 0.18234631 |
| TGFB1I1    | 442.482213 | -0.8709957 | 0.03961236 | 0.18234631 |
| TMC3       | 33.4246905 | 1.78052958 | 0.03964714 | 0.18234631 |
| UFM1       | 1582.44192 | -0.5425639 | 0.03963156 | 0.18234631 |
| CSTF2      | 235.663517 | -0.5348823 | 0.03969996 | 0.18249863 |
| NHP2       | 676.13625  | -0.525633  | 0.03971509 | 0.18251361 |
| ZFP2       | 84.1108356 | 0.97823784 | 0.03978718 | 0.18279021 |
| DHODH      | 108.229029 | 0.57447469 | 0.03981825 | 0.18287826 |
| ZNF350     | 358.096635 | -0.5285605 | 0.03983515 | 0.18290118 |
| SEPT7P2    | 213.846962 | 0.81470577 | 0.03987494 | 0.18302918 |

|            |            |            |            |            |
|------------|------------|------------|------------|------------|
| OCA2       | 149.927943 | 1.72605215 | 0.03992957 | 0.1832252  |
| KLF5       | 8777.79522 | -1.1612776 | 0.03997215 | 0.18336582 |
| C16orf89   | 2147.61369 | 1.23785696 | 0.04001567 | 0.18345589 |
| LGI3       | 83.0790265 | -1.4107631 | 0.04001088 | 0.18345589 |
| KAT5       | 834.620873 | -0.4052703 | 0.04007245 | 0.1836614  |
| GYG1       | 836.249559 | -0.515735  | 0.04008953 | 0.1836849  |
| CCNL1      | 1283.81954 | -0.5401969 | 0.04010627 | 0.18370679 |
| IQCG       | 206.018834 | 0.71830569 | 0.04012131 | 0.18372091 |
| C12orf57   | 1094.88893 | -0.5628332 | 0.04017297 | 0.18390264 |
| PGBD5      | 41.5574307 | -0.9639795 | 0.04026419 | 0.18426533 |
| MAMSTR     | 82.874511  | 1.35063273 | 0.04028597 | 0.18431011 |
| RHNO1      | 314.813968 | -0.626767  | 0.04030561 | 0.18434505 |
| FAM98C     | 171.032371 | -0.5326787 | 0.04033968 | 0.18444596 |
| GCSH       | 124.118978 | -0.675388  | 0.04035648 | 0.18446789 |
| PPM1D      | 567.766359 | -0.5106257 | 0.04041121 | 0.18466314 |
| HPGDS      | 76.206555  | 0.92927    | 0.04044408 | 0.18474338 |
| SDC1       | 310.278408 | 0.9240647  | 0.04046387 | 0.18474897 |
| SIRPB2     | 188.633046 | 1.23428549 | 0.04046607 | 0.18474897 |
| PNPLA7     | 280.464684 | 0.88093146 | 0.04047959 | 0.18475576 |
| APBB3      | 699.912022 | -0.4431285 | 0.04051499 | 0.18486241 |
| CASP8AP2   | 974.652688 | 0.43327636 | 0.04059544 | 0.18511955 |
| TANK       | 625.769986 | -0.6413447 | 0.04058995 | 0.18511955 |
| JPH4       | 80.8124154 | 1.72575141 | 0.0406855  | 0.18547517 |
| DIABLO     | 619.940281 | -0.4677553 | 0.04083822 | 0.18611618 |
| LOC1019271 | 25.4096836 | 1.19228853 | 0.04085269 | 0.18612691 |
| KDELC1     | 223.179073 | 0.86137488 | 0.04094995 | 0.18633039 |
| METTL5     | 266.972285 | -0.5020155 | 0.04094229 | 0.18633039 |
| SAAL1      | 153.258553 | 0.57011269 | 0.0409288  | 0.18633039 |
| SPAG4      | 114.233872 | -1.5210845 | 0.04092391 | 0.18633039 |
| TFE3       | 1704.93979 | -0.6365201 | 0.040958   | 0.18633039 |
| CPS1       | 454.571616 | 1.01843886 | 0.04099305 | 0.18637947 |
| TNPO2      | 2307.48723 | -0.4409928 | 0.04098521 | 0.18637947 |
| ABCA10     | 122.71863  | -1.1927391 | 0.04103006 | 0.18643739 |
| CROCC      | 548.567885 | 0.68401082 | 0.04102623 | 0.18643739 |
| DHX33      | 499.834105 | -0.5815338 | 0.04108658 | 0.18663736 |
| KCNMB2     | 7.92214541 | 1.764213   | 0.04110165 | 0.18663736 |
| 11-Sep     | 4359.80066 | 0.92407531 | 0.04111051 | 0.18663736 |
| FBXL3      | 2268.6555  | -0.5174164 | 0.04114632 | 0.18674473 |
| REEP2      | 325.401308 | -1.3659449 | 0.04120586 | 0.18695974 |
| JOSD1      | 1221.58578 | -0.7991479 | 0.04128986 | 0.18728555 |
| PTGS1      | 524.014216 | 0.94410053 | 0.04133341 | 0.18742775 |
| SHKBP1     | 493.457537 | -0.5704404 | 0.04143292 | 0.18782351 |
| SYS1       | 1145.77842 | -0.6265988 | 0.04149212 | 0.18798096 |
| WDR81      | 1598.48427 | 0.6479701  | 0.04148619 | 0.18798096 |
| ERI2       | 255.94301  | 0.45647721 | 0.04152251 | 0.18806319 |
| EXT2       | 2539.70213 | 0.61299743 | 0.0416096  | 0.1883466  |
| LAGE3      | 114.54063  | -0.5720918 | 0.04159836 | 0.1883466  |
| PARP6      | 1228.49522 | -0.4064053 | 0.04165049 | 0.18847614 |
| NT5DC2     | 665.444804 | 1.20383729 | 0.04170772 | 0.18867954 |
| LYL1       | 118.108022 | 1.12588449 | 0.04175963 | 0.18885876 |

|            |            |            |            |            |
|------------|------------|------------|------------|------------|
| LOC1005075 | 170.568354 | 0.9058486  | 0.04179255 | 0.18890274 |
| TRIM71     | 8.51127974 | 1.75738613 | 0.04179395 | 0.18890274 |
| APBA2      | 353.937619 | 1.14252744 | 0.04188109 | 0.18924093 |
| PRKCI      | 2208.1639  | -0.7602948 | 0.041909   | 0.18931139 |
| HK2        | 755.325587 | -1.1948799 | 0.0420702  | 0.1899837  |
| CASC4      | 5488.42822 | -0.5906655 | 0.04211895 | 0.19001981 |
| GXYLT1     | 1496.5006  | -0.8202105 | 0.04212052 | 0.19001981 |
| NGAMT2     | 148.29626  | -0.6647066 | 0.04212768 | 0.19001981 |
| SPG200S    | 9.83702712 | 1.42175794 | 0.04210144 | 0.19001981 |
| ADAMTS9-A  | 165.265537 | 1.52970504 | 0.0421804  | 0.19014598 |
| MBD6       | 1046.47838 | -0.6284752 | 0.04217023 | 0.19014598 |
| RASSF2     | 11983.9063 | 1.26063239 | 0.04222    | 0.19026867 |
| TMEM221    | 10.4184485 | 1.33712523 | 0.04231897 | 0.19065877 |
| HNRNPR     | 2359.58263 | -0.4834422 | 0.04236166 | 0.19079514 |
| RNF2       | 475.094046 | -0.3587982 | 0.042414   | 0.19097488 |
| BCL2       | 1496.27477 | 1.33845559 | 0.04248351 | 0.1912318  |
| FARSB      | 553.130862 | -0.5292486 | 0.04251491 | 0.1913171  |
| PRKAG1     | 751.763767 | -0.436374  | 0.0426539  | 0.19188635 |
| ERLEC1     | 1473.41667 | 0.6490634  | 0.04275786 | 0.19229771 |
| FCGRT      | 4589.85567 | 0.54758549 | 0.04278912 | 0.19238199 |
| NDUFB5     | 825.01833  | 0.55373987 | 0.04282759 | 0.19249863 |
| MKL1       | 843.633737 | -0.7039984 | 0.04284762 | 0.1925323  |
| FGF17      | 25.9454388 | -1.0442245 | 0.04288821 | 0.19260202 |
| PPP1R37    | 417.571038 | -0.386154  | 0.04287944 | 0.19260202 |
| CECR1      | 856.36453  | 0.90211734 | 0.04292974 | 0.19267589 |
| GMNN       | 118.361363 | -1.173501  | 0.04292891 | 0.19267589 |
| LINC00032  | 7.69319968 | 1.62345411 | 0.04294927 | 0.19270727 |
| SLC2A3     | 2447.75673 | -1.644266  | 0.04296423 | 0.19271807 |
| CCL2       | 121.239641 | -1.1128269 | 0.04302759 | 0.19288968 |
| L3MBTL1    | 444.769102 | 0.61144811 | 0.04301815 | 0.19288968 |
| SCYL2      | 1259.23281 | -0.6376317 | 0.04307656 | 0.19299654 |
| TMEM205    | 1367.6984  | -0.9707061 | 0.04307241 | 0.19299654 |
| CBX6       | 1103.68373 | -0.658424  | 0.0431173  | 0.19312276 |
| CPA1       | 19.2362736 | 1.48096599 | 0.04315089 | 0.19321686 |
| TIFA       | 152.292403 | 0.52774371 | 0.04317271 | 0.19325825 |
| NOL4L      | 797.574561 | -0.8182362 | 0.04319911 | 0.19332012 |
| SLC18B1    | 341.560447 | 0.70381207 | 0.04324122 | 0.19345218 |
| ANAPC7     | 880.232366 | -0.3857773 | 0.04328293 | 0.1934698  |
| ARPC1A     | 1406.6551  | -0.6432467 | 0.04325811 | 0.1934698  |
| PRPH2      | 198.427157 | 1.32534361 | 0.04327308 | 0.1934698  |
| RPS6KA5    | 132.881163 | 0.94016387 | 0.04330863 | 0.19352837 |
| ZBTB18     | 422.273059 | -0.5741481 | 0.04335597 | 0.19368357 |
| ALDOA      | 10429.7778 | -0.8550982 | 0.04343435 | 0.19393275 |
| MED15      | 914.142185 | -0.6481001 | 0.04346224 | 0.19393275 |
| SLC25A44   | 577.369513 | -0.6007212 | 0.04345587 | 0.19393275 |
| STX16      | 1402.12832 | -0.7545511 | 0.04346186 | 0.19393275 |
| MAD2L2     | 182.517531 | -0.7706284 | 0.04349184 | 0.19398724 |
| TMEM135    | 1263.47723 | 0.66326838 | 0.04349971 | 0.19398724 |
| ATP8B5P    | 9.49010833 | -1.5007067 | 0.04357862 | 0.19428277 |
| LOC1005062 | 8.33178708 | 1.51362813 | 0.04362824 | 0.19438508 |

|            |            |            |            |            |
|------------|------------|------------|------------|------------|
| RRN3P1     | 133.857383 | 0.87137293 | 0.04361847 | 0.19438508 |
| TMEM170A   | 118.46182  | 0.74882173 | 0.04363953 | 0.19438508 |
| DOCK2      | 1404.00595 | 1.05442284 | 0.04367165 | 0.19447176 |
| SEMA4D     | 595.754487 | 1.02373877 | 0.04369325 | 0.19451157 |
| FAM199X    | 2813.05769 | -0.5870897 | 0.04370691 | 0.19451599 |
| ATG16L2    | 291.176169 | 0.90510148 | 0.04379442 | 0.19480398 |
| HDHD2      | 1020.5887  | -0.6389936 | 0.04379698 | 0.19480398 |
| PCDHGB3    | 393.181254 | -0.7714037 | 0.04386481 | 0.19504921 |
| TIMP4      | 30.0067995 | -1.421195  | 0.04389694 | 0.19513562 |
| BRWD3      | 1309.495   | -0.51405   | 0.04392087 | 0.19518554 |
| RABEP2     | 289.458948 | 0.62458493 | 0.0439458  | 0.19523984 |
| TIMM17B    | 277.192007 | -0.6088438 | 0.04396202 | 0.19525544 |
| LOC1019277 | 20.0901499 | 1.69148304 | 0.04397565 | 0.19525953 |
| TET2       | 2204.29422 | 0.49388786 | 0.04400232 | 0.19532146 |
| RBM28      | 535.273247 | 0.41545957 | 0.04408473 | 0.19563076 |
| AK9        | 203.721743 | 0.9366001  | 0.04419996 | 0.19599423 |
| C9orf129   | 8.16769448 | -1.603152  | 0.04420491 | 0.19599423 |
| NBPF11     | 27.566811  | 0.97134088 | 0.04419561 | 0.19599423 |
| BRE-AS1    | 45.6777617 | -1.3728161 | 0.04433619 | 0.19646291 |
| DCC        | 782.467291 | 1.73046457 | 0.04432471 | 0.19646291 |
| FAM124B    | 31.9189756 | 1.34560148 | 0.04438345 | 0.19655894 |
| URAHP      | 11.5925216 | 1.66194892 | 0.04437854 | 0.19655894 |
| CADPS      | 41.6683245 | 1.73766166 | 0.04442389 | 0.19668135 |
| NDUFAF1    | 291.773131 | -0.7289968 | 0.04456301 | 0.19724042 |
| BTK        | 260.923328 | 1.14609228 | 0.04462844 | 0.19742014 |
| CWC25      | 435.830178 | -0.5498775 | 0.04463052 | 0.19742014 |
| SNORA80B   | 13.1682768 | 1.21822514 | 0.04464216 | 0.19742014 |
| MRPL42     | 870.617747 | -0.5349578 | 0.04467278 | 0.19749866 |
| CD151      | 2733.46182 | -0.545807  | 0.04469562 | 0.19754279 |
| PSMA4      | 983.153628 | -0.5512856 | 0.04473539 | 0.19766171 |
| RPL18      | 6077.25252 | -0.4569376 | 0.04475058 | 0.19767197 |
| NHP2L1     | 1059.19523 | -0.7052079 | 0.0447897  | 0.19778791 |
| GPR161     | 889.060853 | 0.85778651 | 0.04482756 | 0.19789824 |
| SLC7A14    | 88.5162193 | 1.50581281 | 0.04484558 | 0.19792088 |
| LAMTOR5    | 489.584802 | -0.7850519 | 0.04489319 | 0.19807412 |
| MRPL17     | 510.811017 | -0.4657841 | 0.04492255 | 0.19814674 |
| RAB1B      | 2194.7423  | -0.4499224 | 0.04494911 | 0.19820701 |
| ASGR2      | 9.0852703  | 1.48156438 | 0.04510855 | 0.19862502 |
| C14orf37   | 311.149733 | 1.28092156 | 0.04509729 | 0.19862502 |
| DLX5       | 14.6287446 | 1.66131825 | 0.04509687 | 0.19862502 |
| DOCK3      | 80.5828776 | -1.4740639 | 0.04509167 | 0.19862502 |
| MOCS1      | 536.470769 | 0.71674933 | 0.04509721 | 0.19862502 |
| CDV3       | 3795.37264 | -0.5635047 | 0.04516224 | 0.19880443 |
| BCL7B      | 564.528227 | -0.7361353 | 0.04522942 | 0.19898615 |
| CLHC1      | 268.311637 | 0.77952311 | 0.04521649 | 0.19898615 |
| CENPO      | 235.812187 | 0.65013033 | 0.04528032 | 0.19915304 |
| GDF7       | 13.4808576 | 1.41194712 | 0.04530049 | 0.19918392 |
| REEP4      | 194.597466 | 0.58669064 | 0.04531327 | 0.19918392 |
| F11R       | 1023.81092 | -0.7667957 | 0.04533699 | 0.19923119 |
| RARRES1    | 21.9167082 | -1.6493982 | 0.04535861 | 0.19926919 |

|           |            |            |            |            |
|-----------|------------|------------|------------|------------|
| EMP1      | 13609.5461 | 0.765115   | 0.04546373 | 0.1995598  |
| PIM1      | 237.2633   | -1.4011279 | 0.04546296 | 0.1995598  |
| SHARPIN   | 554.972149 | -0.6489048 | 0.04544768 | 0.1995598  |
| KLHDC3    | 1636.82184 | 0.58869652 | 0.0455439  | 0.19979754 |
| MYO5C     | 910.999174 | -1.0032864 | 0.04553414 | 0.19979754 |
| CNTN3     | 593.174456 | 1.57384342 | 0.04559609 | 0.19996939 |
| AMPH      | 70.8927887 | 1.04900599 | 0.04567763 | 0.2002698  |
| ARMCX2    | 1801.18755 | 0.75243925 | 0.04571812 | 0.20030686 |
| CCDC171   | 357.312914 | 1.0606391  | 0.04572651 | 0.20030686 |
| MEA1      | 438.71693  | -0.5431163 | 0.04573823 | 0.20030686 |
| PPAPDC1A  | 36.8782835 | 1.64443722 | 0.04571002 | 0.20030686 |
| TXNRD1    | 2168.34907 | -0.9352531 | 0.0457531  | 0.20031487 |
| DHX30     | 1434.30683 | 0.46407194 | 0.04578437 | 0.20035286 |
| NIF3L1    | 298.814167 | -0.408496  | 0.0458009  | 0.20035286 |
| VAMP4     | 626.201169 | 0.39104932 | 0.04579011 | 0.20035286 |
| FNBP1L    | 647.43064  | 0.59451895 | 0.04587596 | 0.20062407 |
| CNOT3     | 524.011937 | -0.4945584 | 0.0459461  | 0.20075937 |
| CRTC3     | 1189.43211 | -0.6362198 | 0.04594181 | 0.20075937 |
| REV3L     | 2588.07418 | 0.5136925  | 0.04593213 | 0.20075937 |
| ZSCAN30   | 697.3514   | -0.3679368 | 0.04596912 | 0.20080283 |
| TREX2     | 18.7926436 | 1.32403801 | 0.04598492 | 0.20081476 |
| RASSF8    | 4065.1315  | -0.6438038 | 0.04617895 | 0.20160478 |
| CLU       | 96995.8273 | -0.7012204 | 0.04622904 | 0.20160814 |
| EGLN1     | 2055.16381 | -0.6005326 | 0.04622147 | 0.20160814 |
| GDI1      | 2469.30926 | -0.6335464 | 0.04625846 | 0.20160814 |
| LZTS2     | 824.521872 | -0.433109  | 0.0462389  | 0.20160814 |
| PSPC1     | 1127.19967 | -0.4585833 | 0.04623827 | 0.20160814 |
| TREX1     | 157.783172 | 0.76516411 | 0.04624901 | 0.20160814 |
| CYBRD1    | 16522.6678 | 0.92559481 | 0.04628544 | 0.20162575 |
| STRN4     | 1251.7392  | -0.3246683 | 0.04628875 | 0.20162575 |
| MIER3     | 857.718095 | -0.6621699 | 0.04635056 | 0.20183776 |
| ATP6V1E1  | 1264.37556 | -0.7853715 | 0.04638388 | 0.2019247  |
| CD1D      | 37.3576019 | 1.26008224 | 0.04639681 | 0.2019247  |
| SLC38A6   | 560.509547 | -0.5165114 | 0.04646397 | 0.20215974 |
| SUZ12P1   | 88.8602674 | 0.47869168 | 0.04649005 | 0.20221591 |
| ALPK3     | 600.045945 | 1.17570931 | 0.04656542 | 0.20242913 |
| TEN1-CDK3 | 38.8790215 | 1.07664009 | 0.0465607  | 0.20242913 |
| CHD4      | 4873.14109 | -0.5471762 | 0.04672597 | 0.20281099 |
| DCP1B     | 326.426024 | -0.4964123 | 0.04673247 | 0.20281099 |
| DYNLT1    | 652.645332 | -0.8077453 | 0.04669683 | 0.20281099 |
| LOC155060 | 402.584272 | 0.79339255 | 0.04670002 | 0.20281099 |
| RANBP17   | 137.919195 | 1.54040113 | 0.04671511 | 0.20281099 |
| ZNF107    | 423.754998 | 0.38458877 | 0.04670725 | 0.20281099 |
| TMEM57    | 1042.06971 | -0.7210338 | 0.04675163 | 0.20283684 |
| YPEL3     | 738.144857 | 0.51165616 | 0.0468029  | 0.20300196 |
| ATP6V1D   | 816.95618  | -0.6664008 | 0.04682366 | 0.2030347  |
| PCDHGA6   | 589.91055  | -0.7403212 | 0.04691214 | 0.20336093 |
| ZBTB7B    | 902.0966   | -0.5698357 | 0.04700656 | 0.20371275 |
| TMEM240   | 24.3761768 | 1.26043384 | 0.04705875 | 0.20388143 |
| BASP1     | 445.593815 | -0.6893823 | 0.0471479  | 0.20415255 |

|            |            |            |            |            |
|------------|------------|------------|------------|------------|
| TRIT1      | 301.215761 | 0.66487713 | 0.04713498 | 0.20415255 |
| RPA1       | 1247.23486 | -0.5088651 | 0.04723747 | 0.20448273 |
| ERRFI1     | 1122.78983 | -0.7102755 | 0.04727829 | 0.20454597 |
| RFPL1S     | 49.3228328 | 1.50657135 | 0.0472787  | 0.20454597 |
| AFF3       | 920.476149 | 1.14680325 | 0.04732655 | 0.20469532 |
| TIAF1      | 22.1651954 | 1.1179182  | 0.04738224 | 0.20487851 |
| RPS2       | 9264.60874 | -0.4183987 | 0.0473996  | 0.20489591 |
| PGGT1B     | 683.988781 | -0.5849497 | 0.0474167  | 0.20491218 |
| PNMA1      | 1171.22441 | -0.7881341 | 0.04746608 | 0.20506788 |
| NUDT9      | 417.281402 | -0.6772995 | 0.04750153 | 0.20516334 |
| NME6       | 155.731474 | 0.57797071 | 0.04758697 | 0.20547459 |
| COX6A1     | 1494.30993 | -0.5891922 | 0.04762095 | 0.20552837 |
| ISM1       | 236.104501 | 1.23887951 | 0.04762618 | 0.20552837 |
| CCDC36     | 148.929277 | 1.61322898 | 0.04773082 | 0.2059221  |
| USP6       | 311.14961  | 1.70186009 | 0.04774591 | 0.20592937 |
| CTSW       | 22.4956723 | 1.45730843 | 0.04779026 | 0.20600499 |
| ETV5       | 1708.01595 | 0.9081562  | 0.04777857 | 0.20600499 |
| ATF7IP     | 4520.05191 | -0.4165831 | 0.04795749 | 0.20628884 |
| C10orf32   | 725.725066 | 0.37678043 | 0.04799363 | 0.20628884 |
| COLCA1     | 320.494921 | -1.3620264 | 0.04800359 | 0.20628884 |
| MND1       | 11.1559432 | -1.4191363 | 0.04800381 | 0.20628884 |
| MYD88      | 509.818816 | -0.790473  | 0.04789803 | 0.20628884 |
| NAA25      | 963.107207 | -0.3816468 | 0.0479247  | 0.20628884 |
| RAB27A     | 292.631663 | -0.7116502 | 0.04791752 | 0.20628884 |
| SEN3       | 166.393676 | 0.44473871 | 0.04789727 | 0.20628884 |
| SNORA32    | 19.3276661 | -0.9928769 | 0.0479517  | 0.20628884 |
| ZCRB1      | 621.822841 | -0.5591351 | 0.04800218 | 0.20628884 |
| ZNF703     | 53.6861876 | -0.9932194 | 0.04800376 | 0.20628884 |
| C19orf55   | 115.724748 | -0.6408641 | 0.04817876 | 0.20675147 |
| GPR63      | 26.386188  | 1.39761641 | 0.04817406 | 0.20675147 |
| NES        | 324.405287 | 1.14768458 | 0.04815397 | 0.20675147 |
| SLC25A13   | 564.565413 | 0.58252941 | 0.04816006 | 0.20675147 |
| SNORA47    | 136.368339 | -1.1477052 | 0.04814884 | 0.20675147 |
| CDC73      | 1512.91719 | -0.4187763 | 0.04823071 | 0.20685885 |
| GLS        | 4112.99137 | 0.837032   | 0.04822797 | 0.20685885 |
| LOC1027249 | 16.196106  | 1.36418148 | 0.04825375 | 0.20689992 |
| PDRG1      | 188.485519 | -0.6938472 | 0.0484091  | 0.20750808 |
| MIEF2      | 228.663562 | 0.59481899 | 0.04860349 | 0.2082409  |
| PML        | 1249.57451 | -0.4407481 | 0.04860717 | 0.2082409  |
| SERP1      | 3662.66309 | -0.4911173 | 0.04862243 | 0.20824823 |
| AP3S2      | 80.9053823 | -0.6916069 | 0.04866008 | 0.2083514  |
| DCHS2      | 194.835499 | -1.5631706 | 0.04867855 | 0.20837242 |
| PRAF2      | 262.211966 | -0.5276335 | 0.04871446 | 0.20846805 |
| BTD        | 458.16527  | 0.90363513 | 0.04879897 | 0.20859197 |
| CCDC125    | 544.391904 | -0.5500415 | 0.04877424 | 0.20859197 |
| FRAT2      | 220.963698 | 0.70290708 | 0.04876884 | 0.20859197 |
| PDZD11     | 443.343507 | -0.5306073 | 0.04879711 | 0.20859197 |
| SLC25A46   | 1029.79973 | -0.6633297 | 0.04881131 | 0.20859197 |
| KLC2       | 427.80139  | -0.5948194 | 0.04885883 | 0.20873699 |
| BANK1      | 28.2219574 | -1.2156808 | 0.04889728 | 0.20884319 |



|           |            |            |            |            |
|-----------|------------|------------|------------|------------|
| FBXO24    | 42.6248729 | 1.00200879 | 0.04896542 | 0.20907607 |
| EWSR1     | 2805.86255 | -0.4708869 | 0.04909918 | 0.20958897 |
| TERF2     | 461.231625 | -0.5671406 | 0.04915782 | 0.20978101 |
| PPM1E     | 36.5062564 | -1.3606945 | 0.04923482 | 0.21005124 |
| C14orf159 | 866.486434 | 0.83908739 | 0.04927744 | 0.21005809 |
| EFNB3     | 352.797423 | 1.29653798 | 0.04925923 | 0.21005809 |
| ST8SIA5   | 13.6500976 | -1.5417312 | 0.04926732 | 0.21005809 |
| PGLS      | 537.223397 | -0.3720133 | 0.04931327 | 0.2101525  |
| DHX58     | 422.249938 | 0.56840607 | 0.0493476  | 0.21023834 |
| HIC1      | 600.741892 | -0.7959318 | 0.04936078 | 0.21023834 |
| A1BG      | 13.3295573 | 1.19260028 | 0.04941553 | 0.21035488 |
| UGCG      | 521.469695 | -0.736306  | 0.04941428 | 0.21035488 |
| PTPRVP    | 41.3666182 | 1.45220842 | 0.04943307 | 0.21037128 |
| MFAP2     | 100.019122 | 1.40076454 | 0.04946156 | 0.21043423 |
| RILP      | 99.8378283 | 1.04929388 | 0.0494934  | 0.21045313 |
| ZNF442    | 211.869665 | -1.1973556 | 0.04949028 | 0.21045313 |
| OXR1      | 1533.71265 | 0.50107493 | 0.04956008 | 0.21059604 |
| PACRGL    | 237.661543 | 0.48822184 | 0.04956814 | 0.21059604 |
| TRIOBP    | 1589.71882 | -0.6799364 | 0.0495649  | 0.21059604 |
| ATP6VOA1  | 1356.30805 | -0.5620612 | 0.04961353 | 0.21073062 |
| C10orf131 | 14.4815076 | 1.31714878 | 0.04971068 | 0.21106311 |
| MAGI3     | 648.916434 | 0.72706476 | 0.04971929 | 0.21106311 |
| PPP1R13L  | 262.68528  | 1.02436633 | 0.04981104 | 0.2113942  |
| RGS11     | 752.264403 | 0.97372821 | 0.0498569  | 0.2114673  |
| SPG20     | 2949.86294 | -0.4975469 | 0.04985313 | 0.2114673  |
| THEM4     | 351.291078 | -0.6748847 | 0.04986956 | 0.2114673  |
| ZNF584    | 244.995883 | -0.5099468 | 0.04991513 | 0.21160213 |
