# Supplementary material for: Transcriptome signatures associated with meningioma progression
Source: Springer Nature journal article supplement (doi:10.1186/s40478-019-0690-x), 2019-04-30
Supplement: MOESM3 [file 25666702]

**Supplementary Table 2: Differentially expressed genes between GR I and GR II meningiomas**

| Gene     | baseMean   | log2FoldCha | pvalue   | padj       |
|----------|------------|-------------|----------|------------|
| SNORA54  | 64.7422976 | 2.79051051  | 2.70E-12 | 4.69E-08   |
| CYB5R4   | 163.351946 | 0.79342842  | 8.63E-12 | 5.15E-08   |
| FOXC2    | 1389.1451  | -2.0535001  | 8.89E-12 | 5.15E-08   |
| KIF18B   | 49.1523813 | -2.0889794  | 1.12E-09 | 4.87E-06   |
| FAM46A   | 971.176794 | 1.48273008  | 9.27E-09 | 3.22E-05   |
| CDT1     | 43.6735385 | -1.8225603  | 1.26E-08 | 3.65E-05   |
| TONSL    | 106.035819 | -1.1999743  | 3.92E-08 | 9.75E-05   |
| ADCY5    | 3873.82711 | -1.3428415  | 4.55E-08 | 9.90E-05   |
| GATA3    | 40.597388  | -2.4292529  | 7.08E-08 | 0.00013671 |
| FAM111B  | 88.9554194 | -2.0708647  | 8.91E-08 | 0.00014088 |
| MME      | 115.438402 | 2.45659495  | 8.29E-08 | 0.00014088 |
| MKI67    | 524.154621 | -1.5324041  | 1.06E-07 | 0.00015352 |
| SLC12A1  | 49.9326174 | 2.48254528  | 1.41E-07 | 0.00018888 |
| HJURP    | 40.3367613 | -1.7629658  | 2.51E-07 | 0.0003115  |
| RPL21    | 4.53268964 | 2.43670542  | 2.73E-07 | 0.00031681 |
| DHRS9    | 5.09850812 | 2.35093662  | 3.75E-07 | 0.00040707 |
| H2AFX    | 297.192015 | -1.2393945  | 6.05E-07 | 0.00061858 |
| SAMD5    | 452.302445 | 2.3591128   | 6.47E-07 | 0.00062465 |
| SNORA68  | 64.7557195 | 1.61643717  | 8.55E-07 | 0.00078248 |
| CIT      | 256.260186 | -1.3798076  | 1.00E-06 | 0.00081324 |
| SAPCD2   | 23.8000482 | -1.5352375  | 1.08E-06 | 0.00081324 |
| SFRP4    | 2954.03806 | 2.29567173  | 1.06E-06 | 0.00081324 |
| SNORA8   | 43.4061861 | 1.07437583  | 9.82E-07 | 0.00081324 |
| PRF1     | 21.8570483 | 1.73179515  | 1.34E-06 | 0.00097149 |
| CXCR6    | 13.1844377 | 1.96045075  | 1.83E-06 | 0.00122138 |
| FOXM1    | 113.116152 | -1.7000599  | 1.80E-06 | 0.00122138 |
| MEX3A    | 51.4076688 | -1.9343662  | 2.38E-06 | 0.00153144 |
| NNMT     | 234.298871 | 2.14376607  | 2.63E-06 | 0.00157758 |
| XKR5     | 10.1792088 | -1.9937042  | 2.56E-06 | 0.00157758 |
| MYBL2    | 30.7118251 | -1.6994684  | 3.60E-06 | 0.00208421 |
| CDCA8    | 23.387494  | -1.2392254  | 3.86E-06 | 0.00211984 |
| EMP1     | 6904.94278 | 1.02601769  | 3.90E-06 | 0.00211984 |
| RABGAP1L | 2426.43287 | 1.0132424   | 4.30E-06 | 0.00226494 |
| CRTAM    | 7.47832962 | 2.01753894  | 4.78E-06 | 0.00244478 |
| PIK3R2   | 1082.76502 | -0.7533264  | 4.98E-06 | 0.00247296 |
| DHCR7    | 522.223932 | -1.4315901  | 6.25E-06 | 0.00287182 |
| FASN     | 2440.98023 | -1.029502   | 6.28E-06 | 0.00287182 |
| HES7     | 9.17848303 | -1.7865296  | 6.02E-06 | 0.00287182 |
| LMCD1    | 188.364241 | 1.99831876  | 6.74E-06 | 0.00300527 |
| ATP6VOC  | 952.322412 | -0.925104   | 7.76E-06 | 0.00336274 |
| TM7SF2   | 326.641124 | -1.2802461  | 7.93E-06 | 0.00336274 |
| NCAPH    | 47.4022198 | -1.3730055  | 8.73E-06 | 0.00361232 |
| LRFN1    | 61.6358327 | -1.1952381  | 9.28E-06 | 0.0037543  |
| LRCH4    | 1205.26121 | -0.6944232  | 1.05E-05 | 0.00414693 |
| CD300LF  | 12.8331021 | 1.6821662   | 1.09E-05 | 0.0041607  |
| SNORA48  | 444.826349 | 1.341037    | 1.10E-05 | 0.0041607  |

|           |            |            |          |            |
|-----------|------------|------------|----------|------------|
| CKMT1B    | 6.25381488 | -2.0868705 | 1.15E-05 | 0.00417597 |
| CNIH2     | 10.0412955 | -1.6871654 | 1.14E-05 | 0.00417597 |
| CD48      | 42.0489364 | 1.7553302  | 1.23E-05 | 0.00428463 |
| LINC00312 | 20.1184521 | 1.99094282 | 1.23E-05 | 0.00428463 |
| IQGAP3    | 135.909972 | -1.5349083 | 1.28E-05 | 0.00436842 |
| CENPF     | 385.490294 | -1.3417648 | 1.38E-05 | 0.0045403  |
| MYEOV     | 20.5617856 | 1.95857389 | 1.37E-05 | 0.0045403  |
| TACC3     | 203.199935 | -1.0642017 | 1.47E-05 | 0.00465482 |
| TK1       | 80.2210915 | -1.3952776 | 1.45E-05 | 0.00465482 |
| FGF7      | 269.29751  | 2.0367368  | 1.53E-05 | 0.0047389  |
| GSG2      | 13.0983519 | -1.5853267 | 1.58E-05 | 0.00480472 |
| HNRNPUL2  | 569.176155 | -0.6319396 | 1.68E-05 | 0.00490909 |
| MYO7B     | 15.1969971 | 1.96994831 | 1.69E-05 | 0.00490909 |
| TROAP     | 41.975803  | -1.6778743 | 1.64E-05 | 0.00490909 |
| RSAD2     | 134.219731 | 1.1428797  | 1.80E-05 | 0.00512497 |
| TUBB4A    | 20.6916111 | -2.0271591 | 1.93E-05 | 0.00541562 |
| ESPNP     | 1.791792   | -2.022447  | 2.05E-05 | 0.00565644 |
| SNAP23    | 832.314878 | 0.433493   | 2.13E-05 | 0.00579345 |
| INMT      | 3654.08907 | 1.99689177 | 2.45E-05 | 0.00654172 |
| SPP1      | 2077.98996 | -1.7181546 | 2.50E-05 | 0.00657823 |
| IRF4      | 11.9281245 | 1.60744779 | 2.84E-05 | 0.00731724 |
| PRAF2     | 261.387204 | -0.7552604 | 2.86E-05 | 0.00731724 |
| ARHGEF39  | 38.9795826 | -1.5887614 | 3.00E-05 | 0.00745674 |
| WDR62     | 43.7854862 | -1.25529   | 2.97E-05 | 0.00745674 |
| HMMR      | 44.4257183 | -1.2693392 | 3.05E-05 | 0.00747781 |
| GLDC      | 224.224138 | -1.6168839 | 3.30E-05 | 0.00765989 |
| RNF125    | 160.778848 | 1.20169958 | 3.23E-05 | 0.00765989 |
| UPK3B     | 93.3631398 | -1.7135747 | 3.28E-05 | 0.00765989 |
| ZNF777    | 229.449886 | -0.4996994 | 3.21E-05 | 0.00765989 |
| FOXL2NB   | 7.88568688 | -1.9095702 | 3.49E-05 | 0.00787987 |
| MASP1     | 45.1146474 | 1.94386215 | 3.53E-05 | 0.00787987 |
| ZDHHC23   | 66.5945428 | -1.7555192 | 3.53E-05 | 0.00787987 |
| ASF1B     | 55.8757288 | -1.3510609 | 3.80E-05 | 0.00820692 |
| GRB14     | 65.1340959 | -1.9108577 | 3.75E-05 | 0.00820692 |
| SAT1      | 2459.92264 | 0.83547748 | 3.82E-05 | 0.00820692 |
| TNC       | 456.817626 | 1.93542344 | 3.97E-05 | 0.00841471 |
| GVINP1    | 157.839687 | 1.06773523 | 4.18E-05 | 0.00865355 |
| SNORA57   | 199.996023 | 1.16678941 | 4.14E-05 | 0.00865355 |
| C9orf172  | 17.8450152 | -1.8558674 | 4.27E-05 | 0.00873978 |
| NR3C1     | 2045.44673 | 0.86228076 | 4.33E-05 | 0.008749   |
| ATP2B2    | 33.2653921 | -1.9371524 | 4.55E-05 | 0.00880981 |
| HIST1H2AL | 70.8788399 | -1.1472042 | 4.51E-05 | 0.00880981 |
| TIMELESS  | 327.122821 | -0.7470356 | 4.56E-05 | 0.00880981 |
| TOP2A     | 528.593361 | -1.2755639 | 4.50E-05 | 0.00880981 |
| RRN3P2    | 67.4032899 | 1.53490355 | 4.67E-05 | 0.00882622 |
| SNORA20   | 7.52893899 | 1.80402304 | 4.65E-05 | 0.00882622 |
| ALAS2     | 9.68681026 | 1.69878359 | 4.83E-05 | 0.00894796 |
| CCDC106   | 211.42203  | -0.6755561 | 4.89E-05 | 0.00894796 |
| NTSR1     | 7.2397686  | -1.8968845 | 4.88E-05 | 0.00894796 |
| MYCL      | 88.867699  | 1.69658252 | 5.03E-05 | 0.0091038  |

|          |            |            |            |            |
|----------|------------|------------|------------|------------|
| TNNI2    | 5.44160085 | 1.87697497 | 5.16E-05   | 0.00924711 |
| BAALC    | 95.1209984 | -1.878775  | 5.82E-05   | 0.01032116 |
| CHRM1    | 60.8437769 | -1.8884128 | 6.42E-05   | 0.01123791 |
| E2F8     | 11.394818  | -1.630846  | 6.55E-05   | 0.01123791 |
| EXO1     | 29.6515732 | -1.486033  | 6.66E-05   | 0.01123791 |
| SLC27A6  | 59.7498857 | -1.897834  | 6.64E-05   | 0.01123791 |
| SQRDL    | 541.905034 | 0.68324605 | 6.56E-05   | 0.01123791 |
| SV2A     | 160.178665 | -1.8344552 | 7.01E-05   | 0.01171817 |
| KIF5C    | 108.598516 | -1.7193137 | 7.26E-05   | 0.01191291 |
| LIX1     | 24.704353  | -1.8443825 | 7.23E-05   | 0.01191291 |
| BIRC5    | 59.6859769 | -1.4832718 | 7.42E-05   | 0.01205063 |
| APOD     | 2645.65144 | 1.85713074 | 7.88E-05   | 0.0126782  |
| MLC1     | 10.612227  | -1.8126585 | 8.04E-05   | 0.01270728 |
| PLK1     | 40.6286641 | -0.9303432 | 7.97E-05   | 0.01270728 |
| CKAP2L   | 53.3841787 | -1.5277708 | 8.22E-05   | 0.01286985 |
| UBAP2L   | 2300.81448 | -0.5473994 | 8.35E-05   | 0.01296689 |
| CKMT1A   | 8.10189129 | -1.8686413 | 8.47E-05   | 0.01303567 |
| FLG      | 6.0170056  | -1.7177142 | 8.57E-05   | 0.01306831 |
| STOML3   | 6.96968784 | 1.86106032 | 8.67E-05   | 0.01310403 |
| GPR171   | 5.61620884 | 1.67579016 | 8.85E-05   | 0.01314433 |
| RBP4     | 106.375847 | 1.8573325  | 8.81E-05   | 0.01314433 |
| APBB2    | 3763.6239  | 0.95670132 | 9.48E-05   | 0.01326195 |
| C9orf72  | 278.998949 | 0.69846978 | 9.53E-05   | 0.01326195 |
| CD247    | 10.7359677 | 1.64873711 | 9.50E-05   | 0.01326195 |
| CEACAM21 | 15.9932161 | 1.38799454 | 9.36E-05   | 0.01326195 |
| FAM180B  | 44.8329746 | 1.8601509  | 9.01E-05   | 0.01326195 |
| SLC31A2  | 301.467561 | 0.97050588 | 9.32E-05   | 0.01326195 |
| SNORD15A | 4.20904752 | 1.72899087 | 9.09E-05   | 0.01326195 |
| STARD5   | 51.113757  | 1.68318704 | 9.16E-05   | 0.01326195 |
| ITK      | 23.3001736 | 1.58781246 | 9.62E-05   | 0.01327671 |
| KIAA1161 | 268.66546  | -1.509933  | 0.00010257 | 0.01396808 |
| TMEM71   | 34.6004469 | 1.460647   | 0.00010283 | 0.01396808 |
| CCR2     | 22.305924  | 1.6771506  | 0.00010479 | 0.01403851 |
| TBC1D17  | 551.588804 | -0.4072952 | 0.00010496 | 0.01403851 |
| HRCT1    | 69.3284308 | -1.3460609 | 0.00010671 | 0.01416369 |
| BST2     | 215.742455 | 1.12600963 | 0.00010925 | 0.01439049 |
| EFCAB12  | 5.41830619 | -1.6210696 | 0.00011226 | 0.01459019 |
| GPR21    | 68.3343227 | -0.9175629 | 0.00011245 | 0.01459019 |
| SMAD6    | 466.211727 | -1.3058669 | 0.00011905 | 0.015278   |
| TIMP2    | 11693.2804 | -0.854391  | 0.0001195  | 0.015278   |
| BCAR3    | 291.733933 | 1.56945153 | 0.00012245 | 0.01535817 |
| DTL      | 109.754687 | -1.3360436 | 0.00012165 | 0.01535817 |
| NUSAP1   | 208.147086 | -1.3154905 | 0.00012278 | 0.01535817 |
| RNF214   | 416.623726 | -0.521379  | 0.00012686 | 0.01568357 |
| TMEM151A | 2.70571895 | -1.8184341 | 0.00012719 | 0.01568357 |
| CDH1     | 6964.26813 | -1.0626426 | 0.0001296  | 0.01576438 |
| DDX60    | 758.615443 | 0.78408633 | 0.00012965 | 0.01576438 |
| ELOVL6   | 273.414928 | -0.9541431 | 0.00013474 | 0.01621834 |
| ZNF462   | 1315.21857 | -0.5307467 | 0.00013525 | 0.01621834 |
| GLI4     | 96.8118172 | -0.8492944 | 0.00014179 | 0.01688529 |

|            |            |            |            |            |
|------------|------------|------------|------------|------------|
| FAM57B     | 1.84152747 | -1.7896021 | 0.00014338 | 0.01695928 |
| CNTN6      | 21.3682893 | 1.71536857 | 0.00014567 | 0.01708991 |
| MAG        | 16.2178851 | -1.8005717 | 0.00014726 | 0.01708991 |
| MRPL12     | 249.288035 | -1.0872394 | 0.0001494  | 0.01708991 |
| PDE1C      | 131.709733 | 1.75325866 | 0.00014754 | 0.01708991 |
| SGOL1      | 25.118392  | -1.3597875 | 0.00014897 | 0.01708991 |
| CLEC16A    | 965.642503 | -0.5966922 | 0.00015048 | 0.01710096 |
| HSD11B1    | 18.8336478 | 1.77845123 | 0.00015286 | 0.01715736 |
| PLAC9      | 139.713449 | 1.76407172 | 0.00015295 | 0.01715736 |
| AMICA1     | 87.6598187 | 1.45832366 | 0.00015495 | 0.01726955 |
| E2F7       | 29.7945589 | -1.3083616 | 0.00015647 | 0.01732875 |
| CSPG5      | 22.9474439 | -1.580894  | 0.00015877 | 0.01736143 |
| RRM2       | 123.921238 | -1.4704583 | 0.00015819 | 0.01736143 |
| KIF13B     | 795.455984 | 0.64665399 | 0.00016443 | 0.01786793 |
| RPL10      | 6274.98926 | 0.66197874 | 0.00016898 | 0.01824852 |
| CNTD2      | 10.4343686 | -1.6294239 | 0.00017244 | 0.01850707 |
| HIST1H2BO  | 79.785941  | -1.2210019 | 0.00017461 | 0.01851182 |
| MTRNR2L9   | 44.9687745 | 1.28915051 | 0.00017438 | 0.01851182 |
| MAFA       | 9.28379036 | -1.7774093 | 0.00017769 | 0.01872467 |
| PM20D2     | 309.816305 | 0.9406419  | 0.00018124 | 0.0189832  |
| APLP2      | 18394.4455 | -0.9773797 | 0.00018741 | 0.01951235 |
| CABLES2    | 222.678344 | -0.9708408 | 0.00019214 | 0.01977204 |
| ELMOD3     | 193.82149  | 0.64481761 | 0.00019218 | 0.01977204 |
| LOC1030918 | 39.642703  | -1.0999908 | 0.00019552 | 0.01988017 |
| SPC25      | 13.3479767 | -1.5846745 | 0.0001955  | 0.01988017 |
| AGBL1      | 44.0690941 | -1.7659194 | 0.00020253 | 0.02047328 |
| AGR2       | 190.346518 | -1.7309541 | 0.00020613 | 0.02053107 |
| SNORA46    | 4.74953345 | 1.69763564 | 0.00020665 | 0.02053107 |
| VMO1       | 32.6277353 | 1.46854069 | 0.00020558 | 0.02053107 |
| BST1       | 140.238402 | 1.48490116 | 0.00021265 | 0.02100752 |
| FTH1       | 12139.9142 | -0.8951283 | 0.00021508 | 0.0210092  |
| NKD1       | 1058.92778 | 1.75300857 | 0.00021493 | 0.0210092  |
| LOC1019269 | 2.16560281 | 1.743871   | 0.00022368 | 0.02160671 |
| TMEM223    | 130.184901 | -0.7194769 | 0.00022259 | 0.02160671 |
| DAPL1      | 90.6012377 | -1.7491294 | 0.00022495 | 0.02160934 |
| MELK       | 53.827606  | -1.263311  | 0.00023224 | 0.02216628 |
| PID1       | 291.92102  | 1.65073619 | 0.00023585 | 0.02216628 |
| RECQL4     | 68.1728441 | -1.0414441 | 0.00023491 | 0.02216628 |
| RIPK3      | 29.0237823 | 1.1979901  | 0.00023569 | 0.02216628 |
| FCER1A     | 18.4550699 | 1.74075252 | 0.00024195 | 0.02261737 |
| ARRDC1     | 301.255895 | -0.5887503 | 0.00024668 | 0.02293585 |
| DPP6       | 79.6289983 | -1.7356044 | 0.00024813 | 0.02294767 |
| HTR2C      | 3.80921066 | 1.71809611 | 0.00025332 | 0.02306011 |
| NUDCD2     | 161.101517 | 0.5877164  | 0.00025186 | 0.02306011 |
| THEMIS     | 15.1005149 | 1.39862486 | 0.00025211 | 0.02306011 |
| WSCD2      | 20.0834717 | 1.72955311 | 0.00025479 | 0.02307278 |
| CDC25A     | 53.9950623 | -1.2069971 | 0.0002594  | 0.02336869 |
| CD6        | 14.5510264 | 1.46125051 | 0.00026203 | 0.02348454 |
| EPHA3      | 213.837595 | -1.6505499 | 0.00026353 | 0.02349703 |
| AKAP7      | 178.360219 | 0.97705692 | 0.00026728 | 0.02360284 |

|            |            |            |            |            |
|------------|------------|------------|------------|------------|
| PITX1      | 21.7746426 | -1.724441  | 0.00026743 | 0.02360284 |
| OGFRL1     | 1274.54116 | 0.74105156 | 0.00027682 | 0.0241867  |
| OR7E2P     | 15.2545802 | 1.70373385 | 0.00027593 | 0.0241867  |
| ANLN       | 224.004783 | -1.3168124 | 0.00028031 | 0.0243688  |
| KIF20A     | 75.0544624 | -1.3643683 | 0.00028725 | 0.02484754 |
| WNT6       | 855.977741 | -1.4565186 | 0.00029771 | 0.02562542 |
| SLC28A1    | 5.26275606 | 1.69933971 | 0.00029971 | 0.02566989 |
| AIM1       | 142.33772  | 1.17055757 | 0.00031664 | 0.02618391 |
| BUB1       | 71.9879182 | -1.1734406 | 0.00030817 | 0.02618391 |
| IKZF3      | 63.53037   | 1.39188211 | 0.00031926 | 0.02618391 |
| KCNE1      | 19.8029955 | 1.60736699 | 0.00031359 | 0.02618391 |
| OLIG1      | 9.33133211 | -1.709968  | 0.00031902 | 0.02618391 |
| RGS6       | 78.866059  | 1.7108689  | 0.00031784 | 0.02618391 |
| SLC29A1    | 1385.46232 | 1.21253615 | 0.00031563 | 0.02618391 |
| TESK1      | 383.369415 | -0.6399641 | 0.00031189 | 0.02618391 |
| ZNF812     | 106.826012 | 1.50674087 | 0.00031743 | 0.02618391 |
| DNAJC30    | 262.306403 | -0.6399887 | 0.00032206 | 0.02628932 |
| NTN4       | 449.456681 | 1.4465496  | 0.00032391 | 0.02631714 |
| FAM105A    | 1031.8286  | 1.08888095 | 0.0003321  | 0.02647044 |
| FSIP2      | 128.67232  | 1.70549569 | 0.00033341 | 0.02647044 |
| HIST1H2AI  | 84.522384  | -0.9963856 | 0.00032887 | 0.02647044 |
| 2-Mar      | 125.791235 | -1.0117828 | 0.00033057 | 0.02647044 |
| SNRNP200   | 5316.06865 | -0.570378  | 0.00033043 | 0.02647044 |
| C11orf30   | 601.7236   | -0.4399414 | 0.00033736 | 0.02654116 |
| FAM95A     | 36.5818931 | -1.6813035 | 0.0003369  | 0.02654116 |
| P2RX1      | 7.2688877  | 1.53537318 | 0.00033941 | 0.02658237 |
| SNORA81    | 296.870745 | -0.8684158 | 0.00034107 | 0.02659308 |
| FASLG      | 1.5326484  | 1.69649556 | 0.0003475  | 0.02686949 |
| GREM2      | 14.4871489 | 1.67633949 | 0.00034836 | 0.02686949 |
| LOC1005075 | 86.4116688 | 0.99595091 | 0.0003508  | 0.02686949 |
| ZNF444     | 168.463001 | -0.5419499 | 0.00035055 | 0.02686949 |
| ARRDC4     | 567.55272  | -1.1603636 | 0.00035294 | 0.02691492 |
| ANKRD20A8  | 62.0939695 | -1.556732  | 0.0003596  | 0.02699578 |
| SMOC2      | 1130.42935 | 1.54784275 | 0.00035798 | 0.02699578 |
| TAGLN3     | 4.95845704 | -1.6727621 | 0.00035975 | 0.02699578 |
| XG         | 1.85115307 | 1.685851   | 0.00036021 | 0.02699578 |
| C11orf84   | 214.61158  | -0.535387  | 0.00036199 | 0.02701038 |
| FBXO41     | 386.96081  | -0.8209366 | 0.00036351 | 0.02701038 |
| SPRED1     | 1540.45874 | 0.41647624 | 0.00036563 | 0.02705188 |
| C10orf32   | 395.707134 | 0.77338939 | 0.0003757  | 0.02754983 |
| CXCL11     | 14.714114  | 1.50218837 | 0.00037977 | 0.02754983 |
| OTX1       | 6.06169637 | -1.6918088 | 0.00037549 | 0.02754983 |
| RNF208     | 22.8795617 | -1.0174066 | 0.00037908 | 0.02754983 |
| TGFB3      | 648.138033 | 1.22815434 | 0.00038028 | 0.02754983 |
| ALCAM      | 10301.5201 | 0.92035656 | 0.00038349 | 0.02757769 |
| BUB1B      | 83.0742314 | -1.2701914 | 0.00038504 | 0.02757769 |
| CCDC85B    | 88.8916804 | -0.6451072 | 0.00038542 | 0.02757769 |
| STAG1      | 1154.22536 | 0.36951585 | 0.00039861 | 0.02840454 |
| KCNS2      | 3.74361182 | -1.683917  | 0.00040087 | 0.02844891 |
| MILR1      | 42.3398894 | 1.2595035  | 0.00040304 | 0.02848642 |

|           |            |            |            |            |
|-----------|------------|------------|------------|------------|
| STK17B    | 500.471038 | 1.15344003 | 0.00040487 | 0.02850002 |
| MYLK2     | 2.77132371 | -1.6174819 | 0.00041009 | 0.028751   |
| MARK1     | 676.342396 | -1.257605  | 0.00041369 | 0.0288867  |
| PRNCR1    | 63.6379107 | -1.3307521 | 0.00041833 | 0.02909432 |
| ASPM      | 203.142139 | -1.3373551 | 0.00042536 | 0.02946522 |
| CDH8      | 100.669311 | -1.6426531 | 0.00044007 | 0.03005806 |
| DAPP1     | 39.1659324 | 1.39710417 | 0.00043785 | 0.03005806 |
| GPR123    | 2.77180718 | -1.672036  | 0.00044084 | 0.03005806 |
| PRRC2C    | 5684.74013 | -0.3447565 | 0.00043729 | 0.03005806 |
| SIGMAR1   | 593.673992 | -0.5186597 | 0.00044784 | 0.03041671 |
| KCNJ5     | 46.0448957 | 1.09471902 | 0.00045683 | 0.03064417 |
| SNORD89   | 3.3554971  | 1.661578   | 0.00045365 | 0.03064417 |
| TFG       | 1324.92941 | -0.5763249 | 0.00045824 | 0.03064417 |
| WDR66     | 29.7686489 | 1.32909951 | 0.00045757 | 0.03064417 |
| MCOLN2    | 22.2842173 | 1.46254036 | 0.0004639  | 0.03090381 |
| FCN1      | 9.58779747 | 1.53624245 | 0.00046957 | 0.03111324 |
| GADL1     | 12.2254329 | -1.6634357 | 0.00047063 | 0.03111324 |
| CCDC126   | 206.915522 | 1.05496355 | 0.00047843 | 0.03150916 |
| GJA3      | 105.822494 | -1.65261   | 0.00048578 | 0.03187237 |
| COG8      | 361.729413 | -0.4679964 | 0.00048977 | 0.03201365 |
| DCDC5     | 19.8728414 | -1.3518532 | 0.00049778 | 0.03205493 |
| EZH2      | 153.360065 | -0.9664642 | 0.00049747 | 0.03205493 |
| POLR2L    | 1021.25858 | -0.7201249 | 0.00049283 | 0.03205493 |
| TMEM140   | 143.045343 | 0.82019757 | 0.00049651 | 0.03205493 |
| ST8SIA1   | 157.07857  | 1.65504971 | 0.00050321 | 0.0322847  |
| TYRP1     | 4.29170551 | -1.6295323 | 0.00050506 | 0.0322847  |
| UST       | 806.468149 | 0.92203249 | 0.00050924 | 0.0324329  |
| EHMT1     | 1043.19389 | -0.420528  | 0.00051287 | 0.03254453 |
| OAZ1      | 2893.69413 | 0.42755196 | 0.00053237 | 0.03353712 |
| PIWIL2    | 14.4295837 | 1.48403773 | 0.00053198 | 0.03353712 |
| LRRK2     | 964.687633 | 0.77476071 | 0.00054196 | 0.03401803 |
| C4orf19   | 214.311013 | -1.4065298 | 0.00054612 | 0.03415619 |
| SERPINI1  | 62.2110083 | 1.2625427  | 0.00055271 | 0.03432122 |
| TEX36     | 9.73891582 | -1.4774842 | 0.0005519  | 0.03432122 |
| MISP      | 80.2065308 | -1.6170623 | 0.00057062 | 0.03527775 |
| ZNF831    | 11.991846  | 1.5192112  | 0.00057217 | 0.03527775 |
| ESRRG     | 27.4190578 | -1.6286888 | 0.00057608 | 0.03536497 |
| PAX2      | 9.91804074 | 1.55366877 | 0.00057969 | 0.03536497 |
| SOX18     | 73.517234  | -1.3077802 | 0.0005793  | 0.03536497 |
| KCNJ3     | 12.795677  | 1.62940066 | 0.00058264 | 0.03537998 |
| MACC1     | 52.1831125 | 1.27095458 | 0.000584   | 0.03537998 |
| GSTM1     | 11.0895293 | -1.6321575 | 0.00059207 | 0.03574433 |
| DAAM2     | 461.864341 | 1.33448715 | 0.00060091 | 0.03604123 |
| FAM83D    | 20.6180869 | -1.4114271 | 0.00060296 | 0.03604123 |
| IL12RB1   | 30.3169513 | 1.16579459 | 0.00060321 | 0.03604123 |
| IL18R1    | 61.9000131 | 1.22943095 | 0.00060933 | 0.03608977 |
| STAT4     | 13.9256443 | 1.30016166 | 0.00061232 | 0.03608977 |
| ZBP1      | 6.13699663 | 1.44784316 | 0.00061152 | 0.03608977 |
| ZNF620    | 58.3415371 | -0.6239588 | 0.00061143 | 0.03608977 |
| LINC00899 | 20.6782781 | 1.10552892 | 0.00061718 | 0.03613108 |

|            |            |            |            |            |
|------------|------------|------------|------------|------------|
| RABGGTB    | 372.295027 | 0.59536083 | 0.00061608 | 0.03613108 |
| TMEM37     | 307.689208 | -1.1812858 | 0.00061981 | 0.03616305 |
| EHD1       | 4469.46966 | -0.9512801 | 0.0006219  | 0.03616382 |
| DRD2       | 26.6357451 | 1.61852212 | 0.0006283  | 0.03635173 |
| HIST1H2AJ  | 58.857517  | -1.0956936 | 0.00062945 | 0.03635173 |
| STK31      | 24.2490155 | 1.20611604 | 0.0006314  | 0.03635173 |
| ANGPTL1    | 38.4590596 | -1.6071767 | 0.00063428 | 0.036397   |
| NBPF9      | 57.3939878 | 0.94717243 | 0.00064061 | 0.03663913 |
| CTDSPL     | 781.928522 | 0.98372183 | 0.00064709 | 0.03685678 |
| LOC1019272 | 9.78402027 | -1.6217263 | 0.00064866 | 0.03685678 |
| FAM127B    | 336.144905 | -0.7140623 | 0.00065298 | 0.03698179 |
| TEKT3      | 11.4762194 | 1.30214049 | 0.00065961 | 0.03711519 |
| THBS1      | 3879.64074 | 1.57919956 | 0.00065851 | 0.03711519 |
| CCNB2      | 40.1810529 | -1.3010459 | 0.00066673 | 0.03739519 |
| DRD4       | 13.8962408 | -1.2393353 | 0.00067198 | 0.03756824 |
| C1QTNF2    | 32.2221223 | 1.43508498 | 0.00069967 | 0.03796438 |
| CCR7       | 8.92309499 | 1.44767236 | 0.0007009  | 0.03796438 |
| CNTN4      | 585.262809 | 1.60242811 | 0.00069377 | 0.03796438 |
| COL8A2     | 1309.36471 | 1.44751474 | 0.0006968  | 0.03796438 |
| HHIP-AS1   | 40.5567379 | -1.5729606 | 0.00069895 | 0.03796438 |
| MAP4K2     | 390.73645  | -0.4928783 | 0.00068617 | 0.03796438 |
| NCBP2-AS2  | 135.966265 | -0.5672064 | 0.00069873 | 0.03796438 |
| PAQR4      | 63.3348128 | -0.9839475 | 0.00069241 | 0.03796438 |
| PCDHGB6    | 459.839468 | -1.1329565 | 0.00069214 | 0.03796438 |
| TEC        | 120.521681 | 1.18170893 | 0.00069262 | 0.03796438 |
| NBPF25P    | 26.6113457 | 0.93004574 | 0.00070388 | 0.03800749 |
| GPM6A      | 34.8664574 | -1.6025461 | 0.0007102  | 0.03822973 |
| C19orf54   | 128.334239 | -0.7245333 | 0.00071661 | 0.03828402 |
| FLJ22184   | 13.367885  | -1.4081695 | 0.00071849 | 0.03828402 |
| FPGT       | 293.02551  | 0.8072588  | 0.00071548 | 0.03828402 |
| LOC1005068 | 15.0375787 | 0.98412443 | 0.00072001 | 0.03828402 |
| DAPK2      | 86.1383211 | 1.38100327 | 0.00072777 | 0.03855662 |
| PDLIM5     | 3338.41928 | 0.64966617 | 0.00072958 | 0.03855662 |
| LOC1019273 | 8.76884021 | 1.59511917 | 0.00073566 | 0.03876028 |
| GPR64      | 498.340095 | -1.5870444 | 0.00074777 | 0.0388106  |
| LYST       | 1648.24958 | 0.72135079 | 0.000747   | 0.0388106  |
| PHYHIP     | 22.7438981 | -1.4834445 | 0.00074615 | 0.0388106  |
| PLS1       | 143.229114 | 1.41661268 | 0.00074242 | 0.0388106  |
| TMEM63C    | 4.68724508 | -1.5850096 | 0.00074626 | 0.0388106  |
| MIR3648    | 115.332821 | -1.5888939 | 0.00075177 | 0.03890207 |
| RTP4       | 32.6177503 | 1.28010557 | 0.00076225 | 0.03932713 |
| CD300C     | 42.5485309 | 1.16743996 | 0.00077671 | 0.03994704 |
| SCARNA2    | 3244.44112 | 0.89773993 | 0.00077886 | 0.03994704 |
| EPHA1      | 4.54795795 | 1.57090151 | 0.00079072 | 0.04043595 |
| AKT1S1     | 499.073891 | -0.6182784 | 0.00079419 | 0.04043975 |
| CORIN      | 22.0802553 | 1.56805267 | 0.0008001  | 0.04043975 |
| EIF2AK1    | 1861.22239 | -0.446919  | 0.00079625 | 0.04043975 |
| GIT1       | 1092.95322 | -0.5820877 | 0.00079841 | 0.04043975 |
| ABLIM2     | 38.2692368 | -1.2501081 | 0.00080555 | 0.04059754 |
| NEK2       | 19.831797  | -1.1907412 | 0.0008299  | 0.04170385 |

|            |            |            |            |            |
|------------|------------|------------|------------|------------|
| ALG3       | 241.211946 | -0.5951646 | 0.00085764 | 0.04176984 |
| CCDC146    | 109.833519 | 0.89223801 | 0.00084249 | 0.04176984 |
| CD300LB    | 7.47382311 | 1.39437042 | 0.00085702 | 0.04176984 |
| CEP55      | 41.0790013 | -1.0984243 | 0.00084178 | 0.04176984 |
| CRAT       | 752.581721 | -0.6063502 | 0.00084417 | 0.04176984 |
| KIF4A      | 46.7707193 | -1.2723694 | 0.00084978 | 0.04176984 |
| KIFAP3     | 832.683299 | 0.43584585 | 0.00084625 | 0.04176984 |
| PCSK1N     | 266.49682  | -1.3623285 | 0.0008569  | 0.04176984 |
| RNF148     | 28.1598837 | -1.3172246 | 0.0008561  | 0.04176984 |
| RSP03      | 330.284535 | 1.56933262 | 0.00085734 | 0.04176984 |
| SNORA72    | 3.99947742 | 1.53708817 | 0.00085421 | 0.04176984 |
| EBP        | 173.839071 | -0.7110062 | 0.00086866 | 0.04212618 |
| IFI44L     | 238.458502 | 1.12193095 | 0.00087465 | 0.04212618 |
| PCDHB10    | 233.861643 | -1.1647519 | 0.00087063 | 0.04212618 |
| PCLO       | 377.98576  | -1.3261758 | 0.00087457 | 0.04212618 |
| ZNF136     | 315.559268 | 0.61527854 | 0.00088036 | 0.04228422 |
| OAS1       | 278.489062 | 0.70737919 | 0.00088589 | 0.04241226 |
| UHRF1      | 89.9798516 | -1.1039898 | 0.00088791 | 0.04241226 |
| CFP        | 14.3801087 | 1.16423172 | 0.00089278 | 0.04252812 |
| COMMD10    | 237.557634 | 0.72679253 | 0.00092684 | 0.04402985 |
| CLPTM1     | 1462.90645 | -0.4765615 | 0.00093462 | 0.04415811 |
| PPP1R14B   | 483.461703 | -0.8518198 | 0.00093371 | 0.04415811 |
| ATCAY      | 2.05592009 | -1.5662547 | 0.00093773 | 0.04418529 |
| TRAF4      | 547.558686 | -0.6617523 | 0.00094497 | 0.044406   |
| CDC20      | 22.3895803 | -1.1427767 | 0.00094819 | 0.0444372  |
| SCML4      | 6.37639474 | 1.44184643 | 0.00095516 | 0.0446435  |
| ELP2       | 1003.58075 | 0.5588401  | 0.00096062 | 0.04477809 |
| ATG9A      | 931.559122 | -0.5709322 | 0.00096411 | 0.04482078 |
| FBN3       | 53.6619682 | -1.4136766 | 0.00096823 | 0.04489226 |
| SMG7       | 1788.97433 | -0.7230937 | 0.00097708 | 0.04518219 |
| ARHGAP23   | 2148.24881 | -0.6441682 | 0.00098023 | 0.04520777 |
| LOC1006535 | 88.1373372 | -0.836919  | 0.0009853  | 0.04532134 |
| BVES-AS1   | 3.05804349 | 1.56122997 | 0.00098827 | 0.0453378  |
| FABP7      | 4.09153181 | -1.5472487 | 0.00100019 | 0.04565462 |
| LOC729683  | 15.7319099 | 1.09857655 | 0.00100043 | 0.04565462 |
| PRRX1      | 2251.38101 | 1.41309832 | 0.00100334 | 0.0456678  |
| FFAR2      | 2.97140918 | 1.56111662 | 0.00101556 | 0.04577716 |
| HIST1H3B   | 190.856075 | -1.0900759 | 0.00100913 | 0.04577716 |
| PMEL       | 32.0076202 | -1.1428225 | 0.00101117 | 0.04577716 |
| UBXN7      | 831.356524 | -0.3029137 | 0.00101628 | 0.04577716 |
| BCAN       | 4.68393993 | -1.5548811 | 0.00102631 | 0.04599104 |
| PCDHGA3    | 310.829476 | -1.4838208 | 0.0010242  | 0.04599104 |
| TGIF1      | 368.640799 | 0.68378685 | 0.00102943 | 0.04601196 |
| DDX58      | 495.400716 | 0.5246241  | 0.00103607 | 0.0461901  |
| CDCA5      | 43.8916124 | -1.181419  | 0.00104489 | 0.04646418 |
| FDPS       | 872.758372 | -0.6426946 | 0.00104914 | 0.04647449 |
| PROC       | 2.14426731 | -1.5488683 | 0.00105047 | 0.04647449 |
| INCENP     | 260.145488 | -0.5362484 | 0.00106668 | 0.04683446 |
| KL         | 16.4374657 | 1.12945836 | 0.00106553 | 0.04683446 |
| VNN1       | 30.7929398 | 1.16492364 | 0.0010658  | 0.04683446 |



|           |            |            |            |            |
|-----------|------------|------------|------------|------------|
| JADE3     | 297.051228 | -0.6834265 | 0.00107211 | 0.04695398 |
| AMER2     | 12.9198525 | -1.5496231 | 0.00108596 | 0.04722388 |
| ATG4C     | 162.724091 | 0.77325239 | 0.00108913 | 0.04722388 |
| DPYSL5    | 5.34227726 | -1.5449853 | 0.00108663 | 0.04722388 |
| ISG15     | 174.603844 | 0.95056697 | 0.00108899 | 0.04722388 |
| KBTBD12   | 12.0700598 | 1.530281   | 0.00110396 | 0.04761635 |
| MEN1      | 363.925957 | -0.578082  | 0.0011064  | 0.04761635 |
| SEC14L5   | 7.56753197 | -1.3481778 | 0.00110517 | 0.04761635 |
| RABL6     | 1057.50984 | -0.4650734 | 0.00111053 | 0.04767618 |
| AATK      | 159.188281 | -0.961993  | 0.00111562 | 0.04771311 |
| ZAK       | 1010.20175 | 0.69052556 | 0.00111688 | 0.04771311 |
| RAD51     | 24.9627904 | -1.0934468 | 0.00112124 | 0.04778169 |
| CDH7      | 32.3563319 | -1.5407543 | 0.00113288 | 0.04816001 |
| LINC00861 | 7.66901119 | 1.25354494 | 0.00114432 | 0.0485274  |
| CNOT3     | 470.275534 | -0.5358071 | 0.0011579  | 0.04874684 |
| FLRT2     | 2645.62996 | 1.32790283 | 0.00115728 | 0.04874684 |
| ZNF467    | 157.037014 | -1.0537655 | 0.00115666 | 0.04874684 |
| SOX9      | 86.2333095 | -1.5414808 | 0.00117338 | 0.04927902 |
| CALB1     | 257.196546 | -1.506831  | 0.00118575 | 0.04938759 |
| FBRSL1    | 560.503295 | -0.7170961 | 0.00118732 | 0.04938759 |
| SEMA6D    | 402.560072 | 1.30661259 | 0.00118684 | 0.04938759 |
| SLC27A2   | 8.00170566 | 1.46447194 | 0.00118155 | 0.04938759 |
| MYP0P     | 52.7350641 | -0.5992111 | 0.00119392 | 0.04953524 |
| RAB43     | 41.3249386 | -0.6808013 | 0.00119657 | 0.04953524 |
| CD300E    | 18.1270086 | 1.47970317 | 0.00120908 | 0.04981593 |
| PKIB      | 59.3386544 | 1.26710108 | 0.00120785 | 0.04981593 |
| IL6ST     | 11081.6218 | 0.62487189 | 0.00123363 | 0.05043512 |
| PCAT1     | 11.7975226 | -1.3621275 | 0.00123095 | 0.05043512 |
| PCGF5     | 2006.6329  | 0.89496413 | 0.00123571 | 0.05043512 |
| UBE2C     | 53.3635218 | -1.2771861 | 0.00123052 | 0.05043512 |
| SLC7A14   | 387.469028 | -1.5358217 | 0.00124734 | 0.05079036 |
| HCN2      | 51.5538773 | -1.3973687 | 0.00126644 | 0.05144765 |
| CENPU     | 71.0962352 | -0.9539759 | 0.0012743  | 0.05164634 |
| DCLK1     | 960.485365 | -1.2628441 | 0.00128526 | 0.05196908 |
| NOD2      | 44.0843502 | 1.2857291  | 0.00128824 | 0.05196908 |
| CERS2     | 4129.22422 | -0.6036296 | 0.00131165 | 0.05242243 |
| LRFN3     | 102.943811 | -0.7217898 | 0.00130994 | 0.05242243 |
| RHOD      | 227.523735 | -0.65476   | 0.00130702 | 0.05242243 |
| RIMS1     | 33.0494728 | -1.5261625 | 0.00131574 | 0.05242243 |
| UGT8      | 14.003366  | -1.5281533 | 0.00130563 | 0.05242243 |
| ZNF367    | 168.679194 | -1.0170026 | 0.00131757 | 0.05242243 |
| KRT4      | 6.91901968 | -1.5102722 | 0.00133251 | 0.05289573 |
| AP1S2     | 287.786319 | 0.91890369 | 0.00134048 | 0.05309085 |
| ZNF865    | 253.105494 | -0.7664909 | 0.00135527 | 0.05355481 |
| AICDA     | 1.61705965 | 1.45370486 | 0.00137026 | 0.05390188 |
| IL33      | 51.1608722 | 1.41486499 | 0.00137004 | 0.05390188 |
| FADS2     | 1239.73439 | -1.1399395 | 0.00138257 | 0.05414594 |
| NUF2      | 23.9022785 | -1.0560375 | 0.0013858  | 0.05414594 |
| TEX41     | 7.80273756 | 1.38246971 | 0.00138467 | 0.05414594 |
| SLC35C1   | 515.084931 | -0.8827823 | 0.00139205 | 0.05426814 |

|            |            |            |            |            |
|------------|------------|------------|------------|------------|
| CTNND2     | 18.1070977 | -1.4693879 | 0.00140015 | 0.05434012 |
| MCM2       | 243.276245 | -0.622713  | 0.00139922 | 0.05434012 |
| SESN1      | 1713.9264  | 0.91954935 | 0.00141242 | 0.0546945  |
| CADPS2     | 1244.84375 | -1.0922617 | 0.00142319 | 0.05486685 |
| NFE2L1     | 15529.557  | -0.5338257 | 0.00142304 | 0.05486685 |
| CLEC7A     | 519.609595 | 1.23990595 | 0.00142981 | 0.05487875 |
| ST3GAL5    | 1023.22008 | -0.9070243 | 0.0014277  | 0.05487875 |
| ABCC2      | 25.4278383 | 1.08967844 | 0.00145096 | 0.05544584 |
| HDAC4      | 2335.17948 | -0.7891909 | 0.00144896 | 0.05544584 |
| DSE        | 2447.3402  | 0.72549317 | 0.00146095 | 0.05558327 |
| KIF11      | 142.275288 | -0.9698018 | 0.00145909 | 0.05558327 |
| PDHA1      | 778.86514  | -0.5217928 | 0.00148153 | 0.05624315 |
| TEX21P     | 4.36166667 | 1.40399038 | 0.00150365 | 0.05683489 |
| UFSP1      | 17.2339413 | -1.1202075 | 0.00150054 | 0.05683489 |
| KCNA6      | 91.1832728 | 1.50046299 | 0.00151034 | 0.05685841 |
| MEF2D      | 1687.23935 | -0.4834369 | 0.00151409 | 0.05685841 |
| UBQLN4     | 406.237548 | -0.5357323 | 0.00151263 | 0.05685841 |
| ATP1A3     | 36.1258303 | -1.4870047 | 0.00152523 | 0.05694433 |
| DENND5B    | 517.074911 | 0.64294817 | 0.00152812 | 0.05694433 |
| PRKAA2     | 649.440585 | 0.96192509 | 0.00152613 | 0.05694433 |
| RPP30      | 250.311393 | 0.50338448 | 0.00152976 | 0.05694433 |
| ZC3H12D    | 76.2732659 | 1.02514355 | 0.00153275 | 0.05694433 |
| BRD3       | 1039.00833 | -0.5026635 | 0.00153648 | 0.05696133 |
| VAMP5      | 142.29248  | 0.86945896 | 0.00154437 | 0.05713198 |
| LPHN1      | 1217.21103 | -0.6241518 | 0.00155319 | 0.05733621 |
| PIGR       | 21.1502786 | 1.50508626 | 0.0015603  | 0.05735508 |
| ZNF672     | 303.222428 | -0.6235997 | 0.00155765 | 0.05735508 |
| MYRF       | 32.0929361 | -1.453913  | 0.00157441 | 0.05775178 |
| FAM114A2   | 380.5984   | 0.47470769 | 0.00158029 | 0.0578454  |
| PKMYT1     | 18.5580691 | -1.0804598 | 0.00158371 | 0.05784883 |
| CD300A     | 179.312747 | 1.05578818 | 0.00159777 | 0.05823977 |
| GET4       | 291.176169 | -0.4362736 | 0.00161893 | 0.05854776 |
| LOC1019271 | 11.6306092 | 1.22828343 | 0.00161969 | 0.05854776 |
| PTPN22     | 49.6126799 | 1.24593279 | 0.00161364 | 0.05854776 |
| TRPV6      | 3.33123132 | -1.3826763 | 0.00161002 | 0.05854776 |
| CPQ        | 1538.29294 | 0.6891295  | 0.00162652 | 0.05867274 |
| FAM19A2    | 29.0226631 | 0.96077763 | 0.0016336  | 0.05868473 |
| SNORA27    | 8.78269463 | 0.99740329 | 0.00163083 | 0.05868473 |
| CALML3-AS1 | 34.2981976 | -1.4380574 | 0.00164723 | 0.05882848 |
| ELOVL2     | 204.172901 | -1.3541436 | 0.00164775 | 0.05882848 |
| TBC1D32    | 304.78348  | 0.70113663 | 0.00164696 | 0.05882848 |
| CHRD2      | 2.35827471 | -1.4943543 | 0.0016685  | 0.05932563 |
| OPA3       | 799.682831 | -0.4968464 | 0.00166735 | 0.05932563 |
| PMS2P5     | 105.193726 | -0.5136152 | 0.00168959 | 0.0599527  |
| ZNF562     | 1036.3687  | 0.34109906 | 0.00170438 | 0.06035461 |
| TOMM7      | 1174.45746 | 0.56460933 | 0.00170993 | 0.06042802 |
| SLC25A22   | 273.218778 | -0.5375116 | 0.00171687 | 0.06055009 |
| STON1      | 134.988846 | 0.98111675 | 0.00172244 | 0.06062372 |
| AFAP1-AS1  | 10.8211427 | -1.4899628 | 0.00173463 | 0.06079203 |
| ECH1       | 746.708395 | -0.6118864 | 0.00174275 | 0.06079203 |

|            |            |            |            |            |
|------------|------------|------------|------------|------------|
| FOX2-AS1   | 490.291701 | -0.6295266 | 0.00173514 | 0.06079203 |
| PPP5C      | 761.149406 | -0.4297325 | 0.0017482  | 0.06079203 |
| SETD1A     | 635.289942 | -0.519508  | 0.0017402  | 0.06079203 |
| ZNF853     | 258.763868 | -0.6514348 | 0.00174499 | 0.06079203 |
| GAL3ST3    | 8.75365684 | -1.4540576 | 0.00175574 | 0.06093211 |
| PLSCR1     | 305.033368 | 0.53386675 | 0.00176819 | 0.06124214 |
| KIF14      | 56.9840475 | -1.0590854 | 0.00177789 | 0.06137598 |
| LOC1019296 | 12.7237898 | 1.48655668 | 0.00177912 | 0.06137598 |
| PLEKHG2    | 1315.73299 | -0.6547956 | 0.00178774 | 0.06155131 |
| ITGA8      | 289.883369 | 1.46569327 | 0.0018054  | 0.06179217 |
| LOC1019270 | 139.401177 | 0.73832598 | 0.00180233 | 0.06179217 |
| ZMYND19    | 135.822448 | -0.5136854 | 0.00180138 | 0.06179217 |
| BRINP2     | 1.62332854 | -1.4798459 | 0.00182516 | 0.06218981 |
| MMP28      | 192.213943 | 1.30493501 | 0.00182192 | 0.06218981 |
| PDPN       | 607.873804 | -0.7832818 | 0.00182774 | 0.06218981 |
| CLEC4A     | 45.2094336 | 0.91303814 | 0.00185032 | 0.06259037 |
| CPB2-AS1   | 11.8309476 | 1.16847998 | 0.00184617 | 0.06259037 |
| GIN1       | 131.375841 | 0.62159596 | 0.00184927 | 0.06259037 |
| ITGAL      | 138.738009 | 1.15539727 | 0.0018598  | 0.06276458 |
| NCAN       | 30.324849  | -1.4436373 | 0.00186269 | 0.06276458 |
| CREBL2     | 1212.64574 | 0.47630466 | 0.00187034 | 0.06276822 |
| CYS1       | 198.06972  | 1.43146513 | 0.00188084 | 0.06276822 |
| DLAT       | 632.209486 | -0.5809461 | 0.00187957 | 0.06276822 |
| LY75       | 33.1145869 | 1.13643867 | 0.00186996 | 0.06276822 |
| MAZ        | 1061.83571 | -0.3785528 | 0.00187584 | 0.06276822 |
| RUNX3      | 57.4784787 | 1.24502568 | 0.00189444 | 0.06310079 |
| LZIC       | 221.116095 | 0.58796543 | 0.00190933 | 0.06347506 |
| CCDC62     | 9.06321255 | 1.02029051 | 0.00196838 | 0.06378783 |
| CEND1      | 22.9678115 | -1.4227675 | 0.00193663 | 0.06378783 |
| CKS2       | 55.2696058 | -0.9204408 | 0.00193491 | 0.06378783 |
| CLASRP     | 498.758081 | -0.4124842 | 0.00193269 | 0.06378783 |
| ELAC2      | 895.959836 | -0.3934123 | 0.00194661 | 0.06378783 |
| EP400      | 2174.99998 | -0.4984105 | 0.00195615 | 0.06378783 |
| GZMA       | 13.5231778 | 1.38285634 | 0.00196124 | 0.06378783 |
| LRRCS6     | 67.1363228 | -1.0339847 | 0.00195656 | 0.06378783 |
| LY6H       | 14.7437169 | -1.4734456 | 0.00195664 | 0.06378783 |
| MAP3K5     | 699.737954 | 0.98622333 | 0.00194319 | 0.06378783 |
| POLI       | 450.190195 | 0.64174524 | 0.0019701  | 0.06378783 |
| RAB31      | 1324.5195  | 0.92751953 | 0.00196453 | 0.06378783 |
| RNF44      | 725.340282 | -0.4658581 | 0.00196317 | 0.06378783 |
| ZC3H3      | 279.197518 | -0.5231628 | 0.00194244 | 0.06378783 |
| HEPACAM    | 10.5372701 | -1.4632577 | 0.0019806  | 0.06400861 |
| SAMHD1     | 1023.92067 | 0.79567058 | 0.0019887  | 0.06415128 |
| MAP1LC3B   | 1424.6711  | -0.546608  | 0.00200371 | 0.06451571 |
| EPN1       | 1108.02551 | -0.4428056 | 0.00201862 | 0.06463685 |
| OASL       | 40.8264602 | 1.31210198 | 0.00201617 | 0.06463685 |
| RELN       | 770.32184  | -1.4501384 | 0.0020115  | 0.06463685 |
| HIST1H3C   | 105.420162 | -1.0338894 | 0.00202371 | 0.06468054 |
| CDCA3      | 21.1465718 | -0.9510816 | 0.00204782 | 0.06497338 |
| CGN        | 27.0956535 | -1.3197377 | 0.00204239 | 0.06497338 |

|            |            |            |            |            |
|------------|------------|------------|------------|------------|
| HIST1H4I   | 27.7752329 | 1.12177974 | 0.00204386 | 0.06497338 |
| NAV1       | 4411.67642 | -1.097536  | 0.00204775 | 0.06497338 |
| FST        | 37.0397657 | 1.46362663 | 0.00208532 | 0.0657987  |
| OGDH       | 2504.39468 | -0.6721333 | 0.00208897 | 0.0657987  |
| RPPH1      | 89119.3981 | 0.49366733 | 0.00207933 | 0.0657987  |
| SENCR      | 3.57665264 | 1.24059707 | 0.0020852  | 0.0657987  |
| GS1-259H13 | 19.4537603 | 1.06771356 | 0.00212206 | 0.06672004 |
| HLA-DRB5   | 605.376679 | 1.44863273 | 0.00212977 | 0.06684169 |
| KIF27      | 162.950138 | 0.66834507 | 0.0021527  | 0.06743971 |
| ARHGAP39   | 169.059728 | -0.8145926 | 0.0021581  | 0.06748727 |
| DTWD1      | 291.969803 | 0.4970582  | 0.00218067 | 0.06807046 |
| LINC00649  | 7.3261222  | 1.42019341 | 0.002189   | 0.0682081  |
| ZDHH12     | 127.23311  | -0.7271638 | 0.00222361 | 0.0691625  |
| LOXL3      | 201.583648 | 1.24792937 | 0.00224143 | 0.0694682  |
| NLRC4      | 45.7561377 | 1.04764907 | 0.0022403  | 0.0694682  |
| KCNJ10     | 18.6732819 | -1.4380122 | 0.00224653 | 0.06950251 |
| RASD1      | 70.1378513 | 1.42828754 | 0.00225859 | 0.06975142 |
| COMMD8     | 106.676609 | 0.69619217 | 0.00229397 | 0.07046879 |
| STXBP5L    | 6.70791027 | -1.4438401 | 0.00229314 | 0.07046879 |
| ZNF775     | 65.9169199 | -0.467364  | 0.00228826 | 0.07046879 |
| GRIK2      | 19.2947482 | 1.30657513 | 0.00230261 | 0.07060937 |
| ABI1       | 703.155716 | 0.37152985 | 0.00232675 | 0.07122389 |
| NCAM2      | 15.4647447 | -1.2968272 | 0.00233647 | 0.07139593 |
| BANF1      | 420.300617 | -0.732991  | 0.00236402 | 0.07198454 |
| TRIM9      | 61.4999241 | 1.36991203 | 0.00236075 | 0.07198454 |
| CCDC79     | 1.9125435  | 1.39819574 | 0.00238462 | 0.07235842 |
| OAS2       | 267.937696 | 0.83741969 | 0.00238093 | 0.07235842 |
| GRIN1      | 8.78227356 | -1.3973291 | 0.00244694 | 0.07412004 |
| LINC00565  | 5.13099167 | 1.3698408  | 0.00245694 | 0.07416452 |
| NLRP12     | 12.6805793 | 1.26908317 | 0.00245666 | 0.07416452 |
| TLR2       | 828.95426  | 0.99898925 | 0.00246177 | 0.07418174 |
| CHL1       | 11.4677714 | -1.4384912 | 0.00247134 | 0.07428925 |
| HSPA12A    | 418.869675 | 1.30183106 | 0.00247389 | 0.07428925 |
| ATP2B4     | 9242.95109 | -0.4966506 | 0.00248272 | 0.07436904 |
| INTU       | 332.597555 | 0.78702899 | 0.00250221 | 0.07436904 |
| SLC6A6     | 1033.31681 | 1.14006649 | 0.00249282 | 0.07436904 |
| TBCD       | 1261.79407 | -0.4230105 | 0.00249314 | 0.07436904 |
| TMEM242    | 187.644603 | 0.54026166 | 0.0024997  | 0.07436904 |
| TRIP13     | 33.6756831 | -1.0436208 | 0.00250157 | 0.07436904 |
| CPSF7      | 1443.75445 | -0.3626112 | 0.00250969 | 0.07446413 |
| PDZK1IP1   | 7.70385047 | 1.42760105 | 0.00251423 | 0.07447161 |
| BNIP1      | 70.3813559 | 0.50656567 | 0.00254771 | 0.07475426 |
| BOC        | 5077.69244 | 1.20726093 | 0.00255188 | 0.07475426 |
| CSMD2      | 40.8196538 | -1.3726518 | 0.00254918 | 0.07475426 |
| LOC442028  | 42.4067647 | -1.4030321 | 0.00255128 | 0.07475426 |
| PCDHB5     | 589.296158 | -1.1604251 | 0.00255459 | 0.07475426 |
| PCYT1A     | 497.957724 | -0.3591695 | 0.00252965 | 0.07475426 |
| PHF12      | 805.026372 | -0.3582017 | 0.00255809 | 0.07475426 |
| SPATA17    | 13.8910718 | -1.0229323 | 0.00255816 | 0.07475426 |
| CDR2L      | 170.909109 | -0.7891797 | 0.00257054 | 0.07498978 |

|            |            |            |            |            |
|------------|------------|------------|------------|------------|
| COLGALT2   | 21.8237669 | -1.3523222 | 0.00258768 | 0.07536341 |
| IGSF9B     | 328.787612 | -1.064559  | 0.0026004  | 0.07560728 |
| RWDD3      | 57.1841108 | 0.74392954 | 0.00262513 | 0.07595669 |
| TAF4       | 342.047653 | -0.7807454 | 0.00262552 | 0.07595669 |
| TBC1D13    | 614.882199 | -0.2867799 | 0.00262332 | 0.07595669 |
| TMPO-AS1   | 42.5529552 | -0.6247427 | 0.00263258 | 0.07603448 |
| ECHDC3     | 14.3366894 | 1.3424348  | 0.00266381 | 0.07621264 |
| NLRP3      | 278.130152 | 1.18045544 | 0.00266098 | 0.07621264 |
| SCAF4      | 752.70992  | -0.59436   | 0.00264391 | 0.07621264 |
| SH3BP4     | 791.993944 | 1.08293279 | 0.00265425 | 0.07621264 |
| TXK        | 46.2060951 | 1.22013929 | 0.00266505 | 0.07621264 |
| UBALD2     | 222.693235 | -0.5271109 | 0.00266093 | 0.07621264 |
| ZNF423     | 1683.53135 | -0.702123  | 0.00269017 | 0.07680466 |
| EDC3       | 520.134917 | -0.3978702 | 0.00269827 | 0.07690962 |
| PLEKHB1    | 61.2241121 | -1.2972927 | 0.00271819 | 0.07735052 |
| CCNYL1     | 485.257454 | -0.6056742 | 0.00275323 | 0.07749221 |
| COL24A1    | 36.0074805 | 1.09878254 | 0.00275443 | 0.07749221 |
| DKK2       | 2101.90859 | -1.392236  | 0.00274433 | 0.07749221 |
| LCK        | 11.4517425 | 1.22355793 | 0.0027561  | 0.07749221 |
| MCM10      | 23.8513822 | -1.0556516 | 0.00275882 | 0.07749221 |
| PIK3R1     | 4264.52316 | 1.18217041 | 0.00273384 | 0.07749221 |
| PPP2R3C    | 174.816873 | 0.69335584 | 0.00274967 | 0.07749221 |
| TTK        | 39.0981922 | -1.1188768 | 0.00274397 | 0.07749221 |
| TXNDC15    | 1015.35325 | 0.47309699 | 0.0027635  | 0.07749827 |
| JPH3       | 32.1483446 | -1.4209861 | 0.00276808 | 0.07750166 |
| SPATA9     | 4.17467606 | 1.40698605 | 0.00279738 | 0.07819613 |
| CABP1      | 3.69424024 | -1.4119929 | 0.00280333 | 0.07823677 |
| CPLX2      | 25.4642236 | -1.3830655 | 0.00281201 | 0.07825479 |
| CPSF4      | 235.021466 | 0.48758856 | 0.00281298 | 0.07825479 |
| ACY1       | 19.0695241 | -0.9898145 | 0.00284122 | 0.07878836 |
| ATXN2      | 1328.08016 | -0.4494518 | 0.00283961 | 0.07878836 |
| CD180      | 59.6859285 | 1.20019994 | 0.00287199 | 0.07946547 |
| LOC1005073 | 107.406546 | -1.3054834 | 0.00288297 | 0.07946547 |
| PDCD1      | 6.88419005 | 1.41303141 | 0.00288392 | 0.07946547 |
| SLC22A18   | 222.926518 | -0.6797516 | 0.00288008 | 0.07946547 |
| SLC25A5    | 1475.8538  | -0.5612657 | 0.00290268 | 0.07985579 |
| HMP19      | 3.17481616 | -1.3934677 | 0.0029133  | 0.08002152 |
| CNTN2      | 30.97919   | -1.4065623 | 0.00295699 | 0.08071109 |
| IFT43      | 79.6509272 | 0.71891132 | 0.00296626 | 0.08071109 |
| IPCEF1     | 92.9260025 | 1.12469851 | 0.00295546 | 0.08071109 |
| LPIN2      | 1026.12689 | 0.74780832 | 0.00296614 | 0.08071109 |
| PBK        | 32.9299384 | -1.2986264 | 0.00294321 | 0.08071109 |
| PEX5L      | 61.5979785 | -1.3934005 | 0.00296226 | 0.08071109 |
| DPF2       | 676.042073 | -0.3176147 | 0.00298401 | 0.08094081 |
| NEFM       | 14.4416212 | -1.3864106 | 0.00298136 | 0.08094081 |
| ELN        | 2550.34436 | 1.37885694 | 0.00299492 | 0.08102658 |
| MIR4697HG  | 219.262736 | -1.0734321 | 0.00299971 | 0.08102658 |
| RAB11B     | 950.774311 | -0.6214044 | 0.00300116 | 0.08102658 |
| HIP1R      | 359.295327 | -0.7872982 | 0.00301074 | 0.08115939 |
| CDH23      | 3054.61716 | 1.33447104 | 0.00303081 | 0.08138545 |

|            |            |            |            |            |
|------------|------------|------------|------------|------------|
| SNORA76C   | 9.02129668 | 1.34859667 | 0.00303317 | 0.08138545 |
| TRIM17     | 124.13236  | -0.8865744 | 0.00303178 | 0.08138545 |
| HCAR1      | 75.1732506 | -1.0916929 | 0.00304389 | 0.08151866 |
| KRTAP5-10  | 3.25571167 | -1.353105  | 0.00304751 | 0.08151866 |
| ARRDC3     | 2976.74667 | 1.09277638 | 0.0030594  | 0.08158567 |
| LILRA1     | 53.1545123 | 1.16918182 | 0.00305907 | 0.08158567 |
| ADPRM      | 71.2110662 | 0.68676373 | 0.00306492 | 0.08160748 |
| HAPLN4     | 40.6838625 | -1.3419671 | 0.00307466 | 0.08174184 |
| ZBTB24     | 440.538747 | 0.53680156 | 0.00308852 | 0.08198477 |
| KATNA1     | 138.310687 | 0.49605385 | 0.00309365 | 0.08199575 |
| LOC1001315 | 624.574918 | 0.67259025 | 0.00310117 | 0.08207002 |
| MRPL14     | 156.285927 | 0.46572597 | 0.00311306 | 0.08225957 |
| FBLL1      | 21.6624985 | -1.3280561 | 0.00313543 | 0.08263355 |
| ITGB4      | 8808.19914 | -1.1464662 | 0.00313672 | 0.08263355 |
| APOL1      | 612.969323 | 0.86034052 | 0.00316233 | 0.08293501 |
| RGP1       | 408.689085 | -0.4451677 | 0.00316247 | 0.08293501 |
| SPAG5      | 144.038065 | -0.8613314 | 0.0031588  | 0.08293501 |
| GPKOW      | 252.064259 | 0.36711946 | 0.003184   | 0.08324835 |
| KIAA0101   | 31.6370357 | -1.0807114 | 0.00318002 | 0.08324835 |
| FAM13A-AS1 | 101.553891 | 0.72296104 | 0.00321952 | 0.08392478 |
| HIVEP3     | 334.903314 | 1.16739266 | 0.00321617 | 0.08392478 |
| CNTNAP2    | 11.7921351 | -1.2607248 | 0.00325019 | 0.08443111 |
| FAM131A    | 215.878807 | 0.86563474 | 0.00325351 | 0.08443111 |
| RASSF7     | 352.287673 | -0.9285615 | 0.00324537 | 0.08443111 |
| ITGB1BP2   | 12.7707951 | 1.14155843 | 0.00327422 | 0.08484173 |
| HECA       | 1457.14026 | 0.42531012 | 0.00327924 | 0.08484535 |
| CALCOCO1   | 3899.10098 | 0.54900779 | 0.0032992  | 0.08514155 |
| HNRNPUL1   | 2907.41128 | -0.2625461 | 0.00330048 | 0.08514155 |
| FAM171A2   | 207.695354 | -0.6127328 | 0.00331773 | 0.08545982 |
| CLEC10A    | 32.7795779 | 1.38809144 | 0.0033321  | 0.08570309 |
| AAED1      | 98.9985597 | 0.56937638 | 0.00334801 | 0.08594263 |
| UBE2Z      | 1682.28508 | -0.3603113 | 0.0033513  | 0.08594263 |
| CCNE2      | 39.760047  | -1.0609124 | 0.00337062 | 0.08599824 |
| CD3G       | 5.46230276 | 1.30502635 | 0.00336827 | 0.08599824 |
| RUNX2      | 265.948576 | 1.27665222 | 0.00335895 | 0.08599824 |
| SASH1      | 805.735521 | 1.07803443 | 0.00337326 | 0.08599824 |
| TNXB       | 12.0008569 | -1.1965942 | 0.00338592 | 0.08619481 |
| SLC24A2    | 11.2619786 | -1.3863819 | 0.00340455 | 0.08654233 |
| CMPK1      | 1211.37932 | 0.54167863 | 0.00343607 | 0.08666451 |
| IDH3G      | 515.944883 | -0.3059609 | 0.00343463 | 0.08666451 |
| IFIT3      | 530.199371 | 0.62529397 | 0.00343811 | 0.08666451 |
| IL20RA     | 42.8323099 | 1.34818294 | 0.00343103 | 0.08666451 |
| POLQ       | 59.7926793 | -1.0443231 | 0.00343996 | 0.08666451 |
| SLC24A5    | 13.0960738 | 1.37054102 | 0.00344007 | 0.08666451 |
| TRPC2      | 3.53317512 | 1.33216754 | 0.00344425 | 0.08666451 |
| GLP2R      | 21.5659436 | 1.38258272 | 0.00345349 | 0.08668449 |
| HIST1H2AM  | 119.560927 | -0.8223041 | 0.00345715 | 0.08668449 |
| RPL36A     | 405.479259 | 0.56324071 | 0.00346    | 0.08668449 |
| PLCD3      | 2177.10844 | -0.5883187 | 0.00347108 | 0.08683695 |
| SAMD1      | 109.680849 | -0.5717205 | 0.00350317 | 0.08751376 |

|            |            |            |            |            |
|------------|------------|------------|------------|------------|
| FUS        | 2215.03512 | -0.8439204 | 0.00352898 | 0.088032   |
| PSKH1      | 672.598954 | -0.5169536 | 0.00356381 | 0.08877358 |
| ID4        | 1605.00303 | -1.1767496 | 0.00357751 | 0.08898728 |
| VGF        | 2.0483029  | -1.3279221 | 0.00358401 | 0.08902169 |
| GALM       | 189.510216 | 1.0131004  | 0.00359825 | 0.08924795 |
| CST7       | 13.0451121 | 1.31510239 | 0.00360508 | 0.08928994 |
| GPR174     | 4.90680508 | 1.25854859 | 0.00361492 | 0.08940616 |
| SUCNR1     | 10.02809   | 1.36598692 | 0.00362791 | 0.08959999 |
| ZNF503     | 908.66972  | -1.0154582 | 0.0036488  | 0.08998809 |
| PODXL2     | 142.016895 | 1.33340091 | 0.00366331 | 0.09021818 |
| PLA2G3     | 33.5467988 | -1.3823094 | 0.00367033 | 0.09026305 |
| HSD17B12   | 1341.13429 | -0.4499659 | 0.00368035 | 0.09038169 |
| ATP6V0E2   | 503.754585 | -0.7985195 | 0.00369075 | 0.09044757 |
| EPST11     | 142.496041 | 0.79493116 | 0.00370143 | 0.09044757 |
| PCDHGB8P   | 274.578245 | -0.8640492 | 0.00370009 | 0.09044757 |
| PRR14      | 280.130115 | -0.4909005 | 0.00370384 | 0.09044757 |
| COX5A      | 453.453775 | -0.8178721 | 0.00372413 | 0.09077033 |
| CREBRF     | 1557.29524 | 0.35863574 | 0.0037358  | 0.09077033 |
| FAM198A    | 1450.86288 | 1.12882921 | 0.00373794 | 0.09077033 |
| INMT-FAM18 | 6.67703785 | 1.37255922 | 0.00373676 | 0.09077033 |
| C9orf129   | 15.0691183 | -1.3049409 | 0.00375136 | 0.09096928 |
| CCKBR      | 16.4530412 | -1.3501218 | 0.00376659 | 0.09108453 |
| SYTL2      | 267.170501 | 1.07998979 | 0.00376488 | 0.09108453 |
| PRR18      | 2.65289822 | -1.3670338 | 0.00378194 | 0.09125903 |
| USP42      | 373.157657 | -0.445877  | 0.00378431 | 0.09125903 |
| LOC653602  | 11.5032088 | -1.2870678 | 0.0038232  | 0.09187803 |
| SIDT1      | 79.5899168 | -1.2443386 | 0.00382583 | 0.09187803 |
| ZFP2       | 42.5589296 | 0.95644595 | 0.00382516 | 0.09187803 |
| TAF1A-AS1  | 12.2930768 | -0.8422873 | 0.00383898 | 0.0920668  |
| GRIA2      | 5.66403225 | -1.3504063 | 0.00385361 | 0.09229017 |
| C4orf48    | 50.46995   | -1.0394095 | 0.00386071 | 0.09230963 |
| GTF2E1     | 184.989679 | -0.3986459 | 0.00386504 | 0.09230963 |
| ATP6AP1    | 1798.06851 | -0.3601205 | 0.00388101 | 0.09256394 |
| NOB1       | 440.656963 | -0.5674025 | 0.00390421 | 0.09286253 |
| PYHIN1     | 5.88669689 | 1.27225648 | 0.00390263 | 0.09286253 |
| ITPKA      | 8.21757623 | -1.3086315 | 0.00392464 | 0.09309379 |
| SHROOM3    | 273.709548 | 1.27792761 | 0.00391957 | 0.09309379 |
| CYTIP      | 101.521928 | 1.01908808 | 0.00393614 | 0.09316253 |
| PCNXL3     | 1260.3133  | -0.5845613 | 0.00394328 | 0.09316253 |
| TF         | 730.73347  | -1.3558665 | 0.00394361 | 0.09316253 |
| NAALAD2    | 44.8591939 | 1.32687954 | 0.00397397 | 0.09375218 |
| PSMG2      | 406.714032 | 0.53570898 | 0.00399063 | 0.09401773 |
| IDUA       | 295.528376 | -0.7385885 | 0.00400304 | 0.0941824  |
| OLFM2      | 157.844652 | 1.12608149 | 0.00402028 | 0.0944603  |
| LHCGR      | 142.98527  | 1.2487511  | 0.00403972 | 0.09478899 |
| EIF4A2     | 4320.54712 | 0.54849423 | 0.0040527  | 0.09486458 |
| OTOA       | 5.26343811 | 1.26644498 | 0.00405854 | 0.09486458 |
| RBM4B      | 247.045248 | -0.3756326 | 0.00405931 | 0.09486458 |
| SEZ6L2     | 448.267581 | -1.2531142 | 0.00407745 | 0.09516053 |
| NCL        | 4740.46615 | -0.4899548 | 0.0040945  | 0.0953128  |

|            |            |            |            |            |
|------------|------------|------------|------------|------------|
| ZNF57      | 112.741913 | -1.0868014 | 0.00409494 | 0.0953128  |
| FREM2      | 3030.62725 | -1.3306465 | 0.00411055 | 0.09542136 |
| TPI1P2     | 12.8044472 | -1.0255647 | 0.00411058 | 0.09542136 |
| CSNK1D     | 1993.55491 | -0.6084116 | 0.00412326 | 0.09558818 |
| C10orf10   | 243.232188 | 1.11453191 | 0.00413001 | 0.09561722 |
| GZMH       | 6.04943231 | 1.32958897 | 0.00415188 | 0.09599559 |
| PLEC       | 20519.2094 | -0.6021258 | 0.00416452 | 0.09615995 |
| HPCAL4     | 42.9840433 | 1.33591051 | 0.0041898  | 0.09635979 |
| RBPM52     | 241.637265 | -1.0675055 | 0.00418866 | 0.09635979 |
| TRAF3IP3   | 50.9482677 | 1.13753488 | 0.00418062 | 0.09635979 |
| CENPA      | 6.51095311 | -1.2550075 | 0.00429596 | 0.09765759 |
| EBF3       | 281.523312 | 1.28726677 | 0.00429588 | 0.09765759 |
| FANCA      | 96.1499422 | -0.7824018 | 0.00429168 | 0.09765759 |
| LOC1002890 | 129.03819  | -0.8358688 | 0.00430069 | 0.09765759 |
| NRK        | 8.84799623 | 1.24863715 | 0.00426267 | 0.09765759 |
| PAK4       | 705.48698  | -0.6534323 | 0.00430239 | 0.09765759 |
| PSD        | 25.7075168 | -1.1333507 | 0.00428361 | 0.09765759 |
| RMI1       | 90.5334681 | -0.5231139 | 0.00428493 | 0.09765759 |
| RPL23AP32  | 121.91716  | 0.95907969 | 0.00429187 | 0.09765759 |
| STC2       | 101.460474 | -1.3168167 | 0.00425788 | 0.09765759 |
| KHNYN      | 1185.50239 | 0.55421798 | 0.00431651 | 0.09785026 |
| NUP214     | 1494.87086 | -0.3247347 | 0.00434466 | 0.09836006 |
| LOC728730  | 48.4954003 | 0.76577097 | 0.00435822 | 0.09853874 |
| THAP2      | 80.3221008 | 0.59497368 | 0.00437587 | 0.09880935 |
| SOX12      | 219.660189 | -0.7791785 | 0.00440045 | 0.09923549 |
| ASPRV1     | 43.711272  | 1.06956728 | 0.00441704 | 0.09935197 |
| PPAPDC1A   | 14.4831348 | 1.34866952 | 0.0044152  | 0.09935197 |
| ZCCHC14    | 1034.69885 | -0.6036831 | 0.00444504 | 0.0998527  |
| MFGE8      | 758.063176 | 1.0550793  | 0.00445997 | 0.10005867 |
| GNG12      | 1124.33516 | 0.78388498 | 0.00448778 | 0.10020966 |
| GPATCH8    | 2215.65479 | -0.4048219 | 0.00448975 | 0.10020966 |
| KIAA1217   | 3649.44134 | -0.5588894 | 0.00448832 | 0.10020966 |
| TMEM19     | 577.677939 | 0.60979725 | 0.00448277 | 0.10020966 |
| PTGES2     | 450.224357 | -0.6208874 | 0.00451738 | 0.10069706 |
| LCP1       | 895.643789 | 1.04196259 | 0.00455058 | 0.10113551 |
| 9-Mar      | 155.784313 | -0.4828311 | 0.0045545  | 0.10113551 |
| SLAMF1     | 3.38253024 | 1.34069148 | 0.00455233 | 0.10113551 |
| APLP1      | 318.548823 | -1.102055  | 0.00458322 | 0.10164351 |
| COQ9       | 612.114644 | -0.7822085 | 0.00461679 | 0.10225748 |
| BCL2       | 701.365488 | 1.11852604 | 0.00462466 | 0.10226056 |
| CADM3      | 26.860274  | -1.3343959 | 0.004637   | 0.10226056 |
| GPD1L      | 636.862154 | 0.84842188 | 0.00464045 | 0.10226056 |
| PRCC       | 538.9565   | -0.4131572 | 0.00462965 | 0.10226056 |
| HRH2       | 28.7239976 | 1.0449794  | 0.00468217 | 0.10292879 |
| LAMTOR4    | 408.633587 | 0.42179319 | 0.00468262 | 0.10292879 |
| AGPS       | 784.295824 | 0.70086883 | 0.00469324 | 0.10303212 |
| TMEM134    | 137.386849 | -0.4683123 | 0.0047117  | 0.10330684 |
| PCDHGA11   | 449.109429 | -0.897999  | 0.00472013 | 0.10336128 |
| KMT2B      | 1216.85744 | -0.4128647 | 0.00474138 | 0.10369602 |
| CHCHD10    | 76.4417125 | -0.9663219 | 0.00476346 | 0.10395058 |



|            |            |            |            |            |
|------------|------------|------------|------------|------------|
| IGIP       | 472.350334 | 0.47838994 | 0.00476497 | 0.10395058 |
| BCORL1     | 347.68527  | -0.7134923 | 0.00477747 | 0.1039942  |
| MMD2       | 2.73898484 | -1.2920363 | 0.00478442 | 0.1039942  |
| USP22      | 5176.53062 | -0.2812405 | 0.00478492 | 0.1039942  |
| SPTBN2     | 314.857273 | -1.0758415 | 0.00479935 | 0.10417761 |
| NXPB2      | 346.296907 | 1.3082155  | 0.00481346 | 0.10435368 |
| CD244      | 6.75949211 | 1.24172253 | 0.00482672 | 0.10451077 |
| XAF1       | 630.808799 | 0.69243886 | 0.00483993 | 0.10453649 |
| ZNF768     | 372.819997 | -0.3619769 | 0.00483573 | 0.10453649 |
| CHERP      | 615.26542  | -0.5354948 | 0.00487586 | 0.10492151 |
| FAM180A    | 111.783528 | 1.33502251 | 0.00487467 | 0.10492151 |
| 8-Sep      | 1246.53147 | 0.56214788 | 0.00487136 | 0.10492151 |
| CDKN2A     | 39.6918372 | -1.2549045 | 0.00488681 | 0.1050271  |
| LINC00486  | 1.87087957 | 1.33780617 | 0.00489709 | 0.10511824 |
| DDIT4      | 2895.69408 | 1.05000609 | 0.00490877 | 0.10523898 |
| C16orf54   | 21.8968587 | 1.0181682  | 0.0049451  | 0.10587327 |
| RAB23      | 873.865324 | 0.67711701 | 0.00495054 | 0.10587327 |
| P2RX7      | 238.095556 | 0.8629675  | 0.00496341 | 0.1060181  |
| ESPL1      | 55.2829507 | -0.9208443 | 0.00506671 | 0.10753061 |
| FOXK2      | 777.601811 | -0.4602529 | 0.00507132 | 0.10753061 |
| IFIT2      | 350.308076 | 0.69711553 | 0.00506403 | 0.10753061 |
| IL2RG      | 29.1428043 | 1.15862859 | 0.00505584 | 0.10753061 |
| PRX        | 426.820265 | 1.06301298 | 0.00506996 | 0.10753061 |
| RAPGEF6    | 1223.6652  | 0.41621812 | 0.0050516  | 0.10753061 |
| ASIC3      | 41.1661982 | -0.9157001 | 0.00508512 | 0.10756072 |
| ZNF18      | 216.949839 | 0.47292197 | 0.00508182 | 0.10756072 |
| PCDHB16    | 640.45772  | -1.1235345 | 0.00510399 | 0.10782874 |
| IMMT       | 1121.14307 | -0.3892911 | 0.00511295 | 0.10788697 |
| FAM120A    | 3865.91049 | -0.335353  | 0.00512623 | 0.10800046 |
| SYN1       | 31.5551233 | -0.9108988 | 0.00513075 | 0.10800046 |
| SLC14A2    | 9.8875767  | 1.26640764 | 0.00514288 | 0.10812489 |
| ZNF570     | 138.862007 | 0.53727532 | 0.00514921 | 0.10812715 |
| EPAS1      | 8965.43384 | -1.038519  | 0.00516737 | 0.10837758 |
| ABCG4      | 20.9313267 | -1.185688  | 0.00522017 | 0.10915151 |
| DKFZp779M0 | 1.88158929 | 1.31441103 | 0.00523566 | 0.10915151 |
| NDUFA8     | 294.843364 | -0.5730603 | 0.00523501 | 0.10915151 |
| RSP02      | 96.9009835 | -1.2903398 | 0.00522162 | 0.10915151 |
| SERPINE2   | 289.130712 | -1.0999768 | 0.00522731 | 0.10915151 |
| COLCA2     | 57.5554105 | -1.1969528 | 0.00524314 | 0.10917662 |
| USP45      | 276.8965   | 0.52214992 | 0.00525615 | 0.10931657 |
| CCNA2      | 62.2279533 | -0.8279537 | 0.00527287 | 0.10953327 |
| CNNM3      | 400.623147 | -0.4606211 | 0.00528463 | 0.10954615 |
| CYSLTR2    | 11.4243506 | 1.16622611 | 0.00529239 | 0.10954615 |
| MEA1       | 377.58335  | -0.4474876 | 0.00529057 | 0.10954615 |
| LMNB1      | 162.734565 | -0.7608415 | 0.00530945 | 0.10976857 |
| AIM2       | 8.35258149 | 1.29162715 | 0.00533892 | 0.11011596 |
| POLN       | 67.1782299 | 0.65392212 | 0.00533458 | 0.11011596 |
| DPH6-AS1   | 19.7011596 | 0.86084924 | 0.0053617  | 0.11040633 |
| HILPDA     | 211.790283 | 1.17077693 | 0.00538093 | 0.11040633 |
| LOC440300  | 118.954683 | 0.86951248 | 0.00540045 | 0.11040633 |

|           |            |            |            |            |
|-----------|------------|------------|------------|------------|
| MTERFD2   | 480.148397 | -0.4098536 | 0.0053928  | 0.11040633 |
| P2RY2     | 8.90017722 | 1.20914232 | 0.00541015 | 0.11040633 |
| PCDHB9    | 296.550381 | -1.1419611 | 0.00539153 | 0.11040633 |
| SAMD10    | 51.4236982 | -0.9513371 | 0.00536872 | 0.11040633 |
| SAP30BP   | 922.511839 | -0.660785  | 0.00540956 | 0.11040633 |
| TM4SF1    | 689.67252  | 0.9264365  | 0.005409   | 0.11040633 |
| RPS6KA5   | 71.2122553 | 0.80317097 | 0.00542696 | 0.11061964 |
| JPH2      | 70.2374291 | -1.0424023 | 0.00543947 | 0.1106659  |
| TSPAN2    | 25.4463665 | -1.290619  | 0.00544196 | 0.1106659  |
| TEAD2     | 260.734017 | -0.6942381 | 0.00545571 | 0.11081596 |
| MGAM      | 114.952898 | 1.05954637 | 0.00546909 | 0.11095808 |
| RPRM      | 64.6575887 | -1.3172638 | 0.0055002  | 0.11145916 |
| PTGES     | 171.819563 | -1.1193807 | 0.0055105  | 0.11153787 |
| ZBED8     | 204.412699 | 0.59044184 | 0.00554697 | 0.11214553 |
| IGSF9     | 60.8109669 | -1.1343686 | 0.00555822 | 0.11221927 |
| TMC8      | 132.129391 | 0.86910131 | 0.00556352 | 0.11221927 |
| CSNK2A2   | 389.725445 | -0.4194468 | 0.00559269 | 0.11267682 |
| CD164     | 4157.21805 | 0.45226273 | 0.0056432  | 0.11330052 |
| DCHS2     | 387.54053  | -1.2765581 | 0.00563371 | 0.11330052 |
| VSIG1     | 10.0069903 | -1.2096089 | 0.00564283 | 0.11330052 |
| CDH26     | 16.533001  | 0.99882668 | 0.00565654 | 0.11330666 |
| SLC24A1   | 436.639499 | -0.52246   | 0.00565353 | 0.11330666 |
| ZFPM1     | 116.774994 | -0.697804  | 0.00566801 | 0.11340588 |
| LINC00158 | 10.3037477 | 1.21986217 | 0.00567892 | 0.11349355 |
| ABCA3     | 1903.17601 | -0.7440868 | 0.00570596 | 0.11351206 |
| ARHGAP15  | 135.947087 | 0.9127107  | 0.00570278 | 0.11351206 |
| KIAA0825  | 254.420614 | 0.76807855 | 0.00569738 | 0.11351206 |
| TNR       | 2.36313147 | -1.3058055 | 0.00570409 | 0.11351206 |
| CLEC9A    | 69.2180326 | 1.28671649 | 0.00573142 | 0.11388814 |
| DGKD      | 809.634719 | -0.6830989 | 0.0057419  | 0.11396631 |
| SCG2      | 249.680883 | 1.29659144 | 0.0057674  | 0.11421154 |
| TBPL1     | 122.579651 | 0.51979301 | 0.00576343 | 0.11421154 |
| ADAMTS16  | 6.5761487  | -1.2413322 | 0.00581761 | 0.11451342 |
| GAB2      | 903.092845 | 0.74202023 | 0.00582656 | 0.11451342 |
| LINC00612 | 7.86485129 | -1.0685544 | 0.00580084 | 0.11451342 |
| MCM4      | 736.629338 | -0.824     | 0.00579772 | 0.11451342 |
| MSI2      | 1566.21724 | -0.5799445 | 0.00582874 | 0.11451342 |
| PTH2R     | 16.2332361 | -1.297308  | 0.00582501 | 0.11451342 |
| TMEM127   | 1275.38136 | -0.3693338 | 0.00582716 | 0.11451342 |
| ANGPTL5   | 34.9815915 | 1.30136447 | 0.00584291 | 0.1146622  |
| NCKAP5    | 140.11651  | 0.90796442 | 0.00585413 | 0.11475285 |
| ERI1      | 227.88476  | 0.4088752  | 0.00586857 | 0.11490627 |
| ZC3H18    | 537.640961 | -0.3594875 | 0.00587648 | 0.11493174 |
| C16orf59  | 10.8639897 | -1.0564613 | 0.00595265 | 0.1161602  |
| OR56B1    | 13.0455618 | 1.12193681 | 0.00594977 | 0.1161602  |
| AURKB     | 15.489296  | -0.9380534 | 0.00598536 | 0.11666751 |
| SSPN      | 529.500125 | 1.20436378 | 0.00601171 | 0.11693842 |
| STXBP5    | 607.609627 | 0.7734594  | 0.00601271 | 0.11693842 |
| ADAM28    | 330.969652 | 0.98504708 | 0.00605142 | 0.11755988 |
| TNFAIP3   | 1303.11517 | 0.91943125 | 0.00606212 | 0.11763621 |

|            |            |            |            |            |
|------------|------------|------------|------------|------------|
| NCK2       | 1182.03887 | -0.6160038 | 0.00607746 | 0.11773568 |
| ZCCHC10    | 167.848614 | 0.50440645 | 0.00608079 | 0.11773568 |
| C10orf85   | 2.35309528 | 1.25227533 | 0.00609889 | 0.11781092 |
| RTN3       | 2106.90373 | -0.445048  | 0.00610426 | 0.11781092 |
| VIT        | 472.815338 | 1.16716167 | 0.006105   | 0.11781092 |
| LOC80154   | 15.275874  | -0.9209917 | 0.00612539 | 0.11794144 |
| LRRC38     | 84.8316681 | -1.2096145 | 0.00613211 | 0.11794144 |
| NUDT9P1    | 12.182018  | 1.11902339 | 0.00612512 | 0.11794144 |
| ABTB2      | 178.356892 | -0.9874243 | 0.00619667 | 0.11803671 |
| CD2        | 20.5167263 | 1.19579119 | 0.00620495 | 0.11803671 |
| FAM110A    | 53.7685845 | -0.602084  | 0.00618416 | 0.11803671 |
| FHOD3      | 26.0532854 | 1.25822977 | 0.00617617 | 0.11803671 |
| MLST8      | 348.33947  | -0.5208741 | 0.00615805 | 0.11803671 |
| MMP16      | 407.674189 | 1.27261281 | 0.00619083 | 0.11803671 |
| OTUB1      | 600.267761 | -0.4201807 | 0.00619491 | 0.11803671 |
| RNF152     | 145.137445 | 1.15362223 | 0.00619869 | 0.11803671 |
| SLA        | 591.956149 | 0.95660755 | 0.00618925 | 0.11803671 |
| SNX10      | 161.459496 | 0.71043009 | 0.00615488 | 0.11803671 |
| PTTG2      | 4.36363997 | 1.23679387 | 0.0062355  | 0.11836114 |
| RFX1       | 218.417854 | -0.4747616 | 0.00623562 | 0.11836114 |
| DNAJC4     | 307.652101 | -0.5738854 | 0.00628934 | 0.11847679 |
| GATAD2B    | 1292.67104 | -0.3466513 | 0.00628095 | 0.11847679 |
| IGF1       | 723.459871 | 1.22660554 | 0.00629623 | 0.11847679 |
| LPHN3      | 353.719364 | -1.2940989 | 0.0062911  | 0.11847679 |
| LYZ        | 501.312717 | 1.09626237 | 0.00626862 | 0.11847679 |
| OLFM1      | 100.559586 | -1.1345331 | 0.00626494 | 0.11847679 |
| TOP3B      | 145.461937 | 0.50033069 | 0.00626544 | 0.11847679 |
| TP53       | 788.070542 | -0.5509043 | 0.00628751 | 0.11847679 |
| FUBP3      | 980.00338  | -0.2868961 | 0.00632462 | 0.11862582 |
| H19        | 11697.126  | -1.2805468 | 0.00632349 | 0.11862582 |
| LINC00673  | 6.43395397 | -1.2989312 | 0.00632235 | 0.11862582 |
| NCAPG      | 87.0945539 | -1.0358286 | 0.00634593 | 0.11889737 |
| R3HDM1     | 525.237213 | -0.3387705 | 0.00635953 | 0.11902384 |
| PLEKHG4B   | 1996.59081 | -0.9760627 | 0.00637224 | 0.11913353 |
| KIF18A     | 24.6699473 | -1.0471954 | 0.00638741 | 0.11928889 |
| PRSS23     | 656.027551 | 1.05080657 | 0.00641003 | 0.11958286 |
| PCDHGB3    | 462.604847 | -0.9448892 | 0.00645268 | 0.12024954 |
| GPX3       | 827.669826 | 1.12876419 | 0.00648729 | 0.12045754 |
| HACE1      | 295.693129 | 0.56288507 | 0.00648971 | 0.12045754 |
| LIMS2      | 441.766677 | -0.7886258 | 0.0065039  | 0.12045754 |
| LOC1005066 | 72.5561853 | -1.2811276 | 0.00650541 | 0.12045754 |
| MGAT4A     | 1196.00013 | 0.71537453 | 0.00650147 | 0.12045754 |
| ZNF142     | 735.902888 | -0.369913  | 0.00647722 | 0.12045754 |
| ATP8B4     | 380.115258 | 0.96354073 | 0.00652032 | 0.12047703 |
| DCTPP1     | 172.045757 | -0.5033527 | 0.00651618 | 0.12047703 |
| PMP2       | 19.5590563 | -1.2436976 | 0.00652807 | 0.12049211 |
| LOC642423  | 2.41758694 | -1.1841047 | 0.00655838 | 0.12075431 |
| POLR1B     | 600.777877 | -0.5906282 | 0.00655334 | 0.12075431 |
| ZNF438     | 202.171733 | 0.5777919  | 0.00656311 | 0.12075431 |
| TEX30      | 36.9589824 | 0.63802349 | 0.00660547 | 0.12140526 |

|            |            |            |            |            |
|------------|------------|------------|------------|------------|
| ATE1-AS1   | 13.2990628 | 1.26282719 | 0.00661645 | 0.12147851 |
| BLOC1S2    | 265.531384 | 0.49885858 | 0.00664131 | 0.12167808 |
| CASC5      | 150.495053 | -0.9325687 | 0.00664018 | 0.12167808 |
| CDK16      | 1051.10514 | -0.4033456 | 0.00665053 | 0.12171872 |
| NPIP3      | 254.212693 | -0.7601431 | 0.0066629  | 0.12181684 |
| CD3D       | 6.53565323 | 1.25101186 | 0.00667101 | 0.12183699 |
| LINC00607  | 170.570491 | 1.09949617 | 0.00670085 | 0.12218723 |
| MMP15      | 203.928607 | -0.8983571 | 0.00670424 | 0.12218723 |
| CD8A       | 23.3407866 | 1.18436888 | 0.00673787 | 0.12267164 |
| MALT1      | 580.725957 | 0.55946842 | 0.00676187 | 0.12272297 |
| NAGPA      | 113.366373 | 0.33631021 | 0.00675975 | 0.12272297 |
| PCDHGA6    | 598.709092 | -0.7448074 | 0.00675397 | 0.12272297 |
| HORMAD1    | 2.75954033 | 1.28482994 | 0.00678803 | 0.12306927 |
| CNDP1      | 5.00845455 | -1.2665686 | 0.00679728 | 0.12310863 |
| RNF26      | 418.759799 | -0.5994232 | 0.00680892 | 0.12319123 |
| CDC6       | 64.5634376 | -0.8318732 | 0.00683123 | 0.12326245 |
| DCC        | 266.139958 | 1.19555014 | 0.00684122 | 0.12326245 |
| FAM189B    | 323.410998 | -0.6890702 | 0.00683319 | 0.12326245 |
| SNORA74A   | 170.512487 | -0.9074401 | 0.00683504 | 0.12326245 |
| WDR5       | 489.82047  | -0.2830949 | 0.00686174 | 0.12350426 |
| HIATL2     | 58.5729647 | -0.5809169 | 0.00687752 | 0.12366024 |
| LRFN4      | 141.689137 | -0.8728522 | 0.00690232 | 0.12397798 |
| C11orf35   | 45.501862  | -0.7281417 | 0.0069227  | 0.12421568 |
| LOC1019270 | 36.6055844 | 1.19545066 | 0.00694226 | 0.12443814 |
| A2ML1      | 2.63978252 | 1.24157641 | 0.00702184 | 0.12530216 |
| MTNR1A     | 10.2845264 | -1.2173543 | 0.00701866 | 0.12530216 |
| PIWIL4     | 45.2329739 | 0.65993807 | 0.00702649 | 0.12530216 |
| RCN3       | 359.859744 | 1.02935622 | 0.00702551 | 0.12530216 |
| TMX1       | 506.620155 | 0.42558387 | 0.00700728 | 0.12530216 |
| ARMC7      | 203.379469 | -0.7439774 | 0.00705267 | 0.12551149 |
| MORC3      | 1074.32393 | 0.42540844 | 0.00704716 | 0.12551149 |
| MATN2      | 805.827523 | 1.23561188 | 0.00707959 | 0.12573325 |
| RCBTB2     | 929.11056  | 0.48202489 | 0.00707236 | 0.12573325 |
| SLC5A12    | 5.64099751 | 1.27475693 | 0.00713017 | 0.12624474 |
| TMEM8A     | 558.729079 | -0.6107606 | 0.00712958 | 0.12624474 |
| WNT10A     | 10.0492106 | -1.2590329 | 0.00712748 | 0.12624474 |
| FAR2       | 127.656723 | 0.9177934  | 0.0071533  | 0.12652527 |
| ELFN1      | 212.645431 | -1.2085464 | 0.00719331 | 0.12671743 |
| LOC1005061 | 10.001516  | 1.08131146 | 0.00719059 | 0.12671743 |
| RASL10A    | 4.40295805 | -1.2075424 | 0.00717934 | 0.12671743 |
| TERF2      | 406.564654 | -0.4940296 | 0.00717192 | 0.12671743 |
| GFRA1      | 1393.35114 | 1.23393058 | 0.00720843 | 0.12683542 |
| NAV3       | 200.451222 | 1.26969451 | 0.0072146  | 0.12683542 |
| ASCL4      | 2.40084663 | 1.26057602 | 0.0072332  | 0.12690587 |
| LINC01277  | 1.94798293 | 1.22732923 | 0.00722757 | 0.12690587 |
| ADAMTS8    | 4.76093005 | -1.2685834 | 0.00725162 | 0.12710071 |
| IFT20      | 214.647391 | 0.46168129 | 0.00726776 | 0.12725527 |
| CD226      | 19.9320982 | 0.95534324 | 0.00729432 | 0.12733576 |
| NAIP       | 365.861178 | 0.55951946 | 0.00729065 | 0.12733576 |
| TNFRSF11B  | 648.656867 | -1.2363194 | 0.00728641 | 0.12733576 |

|            |            |            |            |            |
|------------|------------|------------|------------|------------|
| ACACB      | 1032.8495  | -0.5171263 | 0.00733899 | 0.12795958 |
| SRCAP      | 2795.47514 | -0.432962  | 0.00734478 | 0.12795958 |
| CSF2RB     | 131.202943 | 0.86669293 | 0.00736768 | 0.12810181 |
| PDK4       | 1431.76572 | 1.06665065 | 0.00736271 | 0.12810181 |
| CCRL2      | 15.194304  | 0.94395075 | 0.00737744 | 0.12814347 |
| FAM69B     | 253.193655 | -0.5439148 | 0.00741349 | 0.12864115 |
| AACS       | 483.406284 | -0.5965074 | 0.00745658 | 0.12913102 |
| OTOG       | 600.368587 | -1.2638118 | 0.00745616 | 0.12913102 |
| AGRN       | 4540.16447 | -0.7400086 | 0.00749003 | 0.129151   |
| C5orf56    | 44.8754375 | 0.70131306 | 0.0075023  | 0.129151   |
| FIZ1       | 139.027269 | -0.6284904 | 0.00747651 | 0.129151   |
| SPIN2B     | 70.731814  | -0.5707647 | 0.0074887  | 0.129151   |
| SSRP1      | 1349.71949 | -0.4118005 | 0.00747784 | 0.129151   |
| ZBTB14     | 251.090396 | 0.42361669 | 0.00749715 | 0.129151   |
| CALN1      | 4.82881805 | -1.2276631 | 0.00751965 | 0.12923712 |
| LINC00663  | 90.9470634 | 0.49825546 | 0.00752217 | 0.12923712 |
| ZNF487     | 52.5235142 | 0.80039227 | 0.00755204 | 0.12962227 |
| DSCAML1    | 15.8013186 | -1.2428101 | 0.00758309 | 0.13001289 |
| OSGEPL1-AS | 10.0894108 | 1.0120173  | 0.00758976 | 0.13001289 |
| SF3B4      | 474.43826  | -0.4951451 | 0.00762277 | 0.13044984 |
| C19orf84   | 1.90016798 | -1.2543399 | 0.00763224 | 0.13048351 |
| CCNF       | 61.6376615 | -0.6631208 | 0.00764277 | 0.13053513 |
| ZEB1       | 1789.54006 | 0.63422753 | 0.00772498 | 0.13180983 |
| CTXN1      | 57.2517326 | -1.0887509 | 0.00773316 | 0.1318201  |
| ADCY10P1   | 86.0881013 | 1.03187122 | 0.00776065 | 0.13215903 |
| LINC00528  | 2.89570624 | 1.25138309 | 0.0077701  | 0.13219047 |
| OSBP       | 1392.33471 | -0.3905737 | 0.00780236 | 0.13260955 |
| CMTM2      | 4.17466554 | 1.22634993 | 0.00788256 | 0.13332605 |
| IMPACT     | 603.019098 | 0.61377123 | 0.0078796  | 0.13332605 |
| NME9       | 4.58331902 | 1.2634046  | 0.00791305 | 0.13332605 |
| PHYHIPL    | 9.97701071 | -1.2387324 | 0.00790897 | 0.13332605 |
| PPP1R16A   | 290.950376 | -0.5325679 | 0.0078895  | 0.13332605 |
| TMEM255A   | 28.2194144 | -1.2463335 | 0.00787067 | 0.13332605 |
| TOX        | 94.3178186 | -1.2565958 | 0.00789384 | 0.13332605 |
| XRCC1      | 404.862327 | -0.3053093 | 0.00786446 | 0.13332605 |
| ZNF629     | 897.76587  | -0.3294286 | 0.00791353 | 0.13332605 |
| CCR10      | 15.5168054 | -1.1725094 | 0.00792871 | 0.13345256 |
| SOX8       | 16.6782149 | -1.0738841 | 0.00795956 | 0.13384226 |
| AMIGO2     | 45.251571  | 0.90295222 | 0.00801482 | 0.13451123 |
| TAC3       | 52.5196817 | -1.2420754 | 0.00801405 | 0.13451123 |
| CERS5      | 623.365968 | -0.4720995 | 0.00805085 | 0.13498571 |
| ACACA      | 1985.95449 | -0.333319  | 0.00810385 | 0.13533125 |
| LCA5       | 110.271634 | 0.78454272 | 0.00810826 | 0.13533125 |
| LOC283038  | 5.15195719 | -1.2385322 | 0.00808096 | 0.13533125 |
| STAT2      | 3379.68105 | 0.48046068 | 0.00811038 | 0.13533125 |
| SYT1       | 14.2163311 | -1.2320904 | 0.00810926 | 0.13533125 |
| ABHD12B    | 1.78657509 | -1.2584342 | 0.00813844 | 0.13550442 |
| COMT       | 579.639681 | 0.46346936 | 0.00814414 | 0.13550442 |
| ZWINT      | 73.834579  | -0.8265865 | 0.0081383  | 0.13550442 |
| MYO5C      | 992.074197 | -0.8441486 | 0.00817133 | 0.13569651 |

|           |            |            |            |            |
|-----------|------------|------------|------------|------------|
| NRTN      | 3.07197564 | -1.2189326 | 0.0081709  | 0.13569651 |
| RHPN1     | 108.200868 | -0.9780445 | 0.00818555 | 0.13569651 |
| TCF3      | 695.671983 | -0.4767267 | 0.00819471 | 0.13569651 |
| TMEM246   | 1191.17467 | -0.5941036 | 0.00819442 | 0.13569651 |
| CC2D2B    | 8.979964   | 1.02297914 | 0.00820294 | 0.13570363 |
| MYO1E     | 701.839052 | 0.88139205 | 0.00821526 | 0.13577818 |
| KLHL6     | 154.938294 | 0.91341376 | 0.00822763 | 0.13585352 |
| LTK       | 11.7758143 | -1.2525205 | 0.00824904 | 0.1360778  |
| MED8      | 239.105288 | 0.60455151 | 0.00826121 | 0.13614942 |
| SERPINB9  | 691.380238 | 0.76983432 | 0.00828809 | 0.13633406 |
| SLC25A39  | 920.928433 | -0.4207606 | 0.00828125 | 0.13633406 |
| ANKRD52   | 1604.22751 | -0.6040626 | 0.00832676 | 0.13634446 |
| ARHGDI    | 2807.66185 | -0.4793724 | 0.00830878 | 0.13634446 |
| LIG1      | 391.633325 | -0.6101171 | 0.00830048 | 0.13634446 |
| PKDREJ    | 5.86225089 | 1.236513   | 0.00831613 | 0.13634446 |
| SNORA34   | 41.5526932 | 0.91718881 | 0.00832794 | 0.13634446 |
| AKAP1     | 920.791321 | -0.605876  | 0.00836439 | 0.1366703  |
| CXorf22   | 12.3686689 | -1.252552  | 0.00837537 | 0.1366703  |
| KIRREL3   | 3.02992025 | -1.2051763 | 0.00837001 | 0.1366703  |
| KLK10     | 98.6965964 | -1.1846132 | 0.00837928 | 0.1366703  |
| BBS9      | 726.939438 | 0.8690632  | 0.00840578 | 0.13671781 |
| MRO       | 344.37948  | -1.0377046 | 0.00839911 | 0.13671781 |
| ZNF513    | 239.474864 | -0.4504987 | 0.00839638 | 0.13671781 |
| TRPC1     | 648.915532 | 0.61637573 | 0.00844126 | 0.13716645 |
| HSPA6     | 99.5555297 | 0.97225371 | 0.00849793 | 0.13782983 |
| WHSC1     | 1173.76822 | -0.4007102 | 0.00849416 | 0.13782983 |
| TLL1      | 84.0375218 | -1.2228575 | 0.00851511 | 0.13797976 |
| MRPS24    | 23.0313649 | -0.8284015 | 0.00853739 | 0.13821187 |
| RHOBTB3   | 933.686218 | 1.20188183 | 0.00859549 | 0.13902313 |
| GANAB     | 6021.59322 | -0.397464  | 0.0086241  | 0.13935615 |
| RPS29     | 1214.40755 | 0.65134405 | 0.00864763 | 0.13947716 |
| ZIC2      | 2732.40827 | -0.5978106 | 0.00863966 | 0.13947716 |
| COL9A2    | 71.3719431 | 1.15699009 | 0.00866411 | 0.13961349 |
| IRF5      | 217.029081 | 0.88760338 | 0.00868552 | 0.13969945 |
| PTPRC     | 1067.6525  | 0.89063111 | 0.00867985 | 0.13969945 |
| SLC26A4   | 14.1547574 | 1.09411195 | 0.00871211 | 0.13999768 |
| CBFA2T2   | 1468.91879 | -0.5168188 | 0.00872681 | 0.14010438 |
| COX7B     | 787.053174 | -0.6433588 | 0.00875203 | 0.14037971 |
| NEAT1     | 27049.2006 | -0.7499036 | 0.00879134 | 0.14075052 |
| SYVN1     | 756.847702 | -0.5138263 | 0.00878753 | 0.14075052 |
| CGNL1     | 2733.14815 | 1.08445893 | 0.00880172 | 0.140787   |
| GUCA1B    | 24.1658682 | 0.80902271 | 0.00881775 | 0.14091382 |
| PDIK1L    | 139.561963 | 0.50374927 | 0.00883795 | 0.1411069  |
| C1orf123  | 273.464227 | 0.54807778 | 0.00887196 | 0.1413902  |
| ITGB5     | 1197.03985 | 0.84883004 | 0.00886882 | 0.1413902  |
| KIAA0195  | 1108.76507 | -0.3479974 | 0.00888683 | 0.14145614 |
| SETD1B    | 942.427482 | -0.4413795 | 0.00889237 | 0.14145614 |
| DPY19L1P1 | 49.5023723 | 0.7604294  | 0.00890123 | 0.14146776 |
| CD96      | 23.0915027 | 1.02569978 | 0.00895374 | 0.14217227 |
| TSPO      | 192.828854 | 0.84838253 | 0.00896365 | 0.14219972 |

|            |            |            |            |            |
|------------|------------|------------|------------|------------|
| MUC1       | 209.220032 | -0.8061194 | 0.00899491 | 0.1425656  |
| SAYSD1     | 143.171344 | 0.53104721 | 0.00900585 | 0.14260909 |
| MED14OS    | 3.24563843 | 1.03746409 | 0.00910591 | 0.14406232 |
| FAM222A    | 14.1037936 | -0.8737198 | 0.00912369 | 0.14414267 |
| LOC1019287 | 6.25394951 | 1.23804872 | 0.00912757 | 0.14414267 |
| PSTPIP2    | 158.05915  | 0.64807259 | 0.00914732 | 0.14432345 |
| NME8       | 5.61397612 | 1.16151762 | 0.00915912 | 0.14437862 |
| HSPA1B     | 31.9372676 | 0.93259314 | 0.00919586 | 0.14454216 |
| PSAP       | 15814.4941 | 0.49509876 | 0.00918885 | 0.14454216 |
| TNFSF8     | 119.722889 | 0.95757694 | 0.00920275 | 0.14454216 |
| ZNF780A    | 570.767845 | 0.43642562 | 0.00919377 | 0.14454216 |
| SYNPO2     | 2277.60722 | 1.17000059 | 0.00922969 | 0.1447068  |
| TCF7L1     | 509.093607 | -0.6008722 | 0.00922988 | 0.1447068  |
| ADRBK2     | 376.385221 | 0.7245664  | 0.00929095 | 0.14529075 |
| CCDC23     | 103.85524  | 0.66036132 | 0.00929219 | 0.14529075 |
| MAEL       | 7.39286542 | 1.23772284 | 0.00928513 | 0.14529075 |
| MX2        | 110.948321 | 0.89934805 | 0.00930755 | 0.14540008 |
| COX10      | 195.490373 | -0.5343056 | 0.00933449 | 0.14569004 |
| KIAA1467   | 363.547678 | 0.63035908 | 0.00935126 | 0.14576845 |
| MED25      | 368.79228  | -0.3885898 | 0.00936228 | 0.14576845 |
| SPAG8      | 43.704786  | 0.7443603  | 0.00936466 | 0.14576845 |
| REPIN1     | 846.007974 | -0.551974  | 0.00938423 | 0.14594247 |
| EPM2A      | 115.151749 | 0.53708555 | 0.00939609 | 0.14599627 |
| NR2F1-AS1  | 360.606317 | 0.99270862 | 0.00942355 | 0.14603148 |
| POM121     | 954.135389 | -0.4639764 | 0.00941752 | 0.14603148 |
| SNORA80A   | 21.4710247 | 1.15526451 | 0.00941588 | 0.14603148 |
| NAP1L4     | 1395.83371 | -0.2649872 | 0.00945631 | 0.14640863 |
| PPFIBP2    | 363.370161 | 0.84928573 | 0.00951349 | 0.1471628  |
| RNFT2      | 106.631705 | -1.1211275 | 0.00952701 | 0.14724093 |
| COG5       | 1033.59123 | 0.33118998 | 0.00956893 | 0.14738377 |
| EIF1B-AS1  | 18.8354416 | 0.9307276  | 0.00956172 | 0.14738377 |
| HGF        | 98.1869171 | 1.04708174 | 0.00958325 | 0.14738377 |
| IL10       | 8.51333969 | 1.22315111 | 0.00958711 | 0.14738377 |
| RNU6ATAC   | 11.5811961 | 1.14521201 | 0.00955055 | 0.14738377 |
| SPN        | 96.904883  | 1.08100549 | 0.00958071 | 0.14738377 |
| APOL6      | 900.663947 | 0.54092724 | 0.00963193 | 0.14794197 |
| PPAN       | 29.5318206 | 0.68464434 | 0.00970686 | 0.14896126 |
| ST6GALNAC4 | 355.12604  | -0.7534811 | 0.00971969 | 0.14902669 |
| TIGD5      | 97.5833098 | -0.5079671 | 0.00974744 | 0.1493205  |
| SPC24      | 18.2866519 | -0.910083  | 0.00976998 | 0.149534   |
| LLGL2      | 262.352419 | -0.9187091 | 0.00977867 | 0.14953535 |
| AQP1       | 2128.3035  | 1.21868593 | 0.00981966 | 0.14983623 |
| C1orf116   | 3.54996246 | -1.1500501 | 0.00983281 | 0.14983623 |
| RPL9       | 5156.65453 | 0.4408049  | 0.00982102 | 0.14983623 |
| ZDHHC24    | 126.346543 | -0.5556511 | 0.00982512 | 0.14983623 |
| FGF12      | 46.6268966 | 1.02724557 | 0.00989242 | 0.15061258 |
| MYOC       | 2.10422338 | 1.21435788 | 0.00992219 | 0.15093367 |
| CCDC86     | 189.26437  | -0.5911012 | 0.00994949 | 0.15111762 |
| CSNK1A1L   | 2.30904193 | -1.1787599 | 0.00995448 | 0.15111762 |
| MPP6       | 1249.39495 | 0.93218699 | 0.00997735 | 0.15111762 |

|           |            |            |            |            |
|-----------|------------|------------|------------|------------|
| SETD5     | 2641.38139 | -0.3617846 | 0.00996862 | 0.15111762 |
| TRAP1     | 773.178921 | -0.5460188 | 0.00997774 | 0.15111762 |
| ZNF688    | 114.765813 | 0.48348667 | 0.00998882 | 0.15115378 |
| COL23A1   | 47.1400289 | 1.22272646 | 0.01001025 | 0.15121477 |
| SNHG17    | 99.7567226 | -0.6535967 | 0.0100051  | 0.15121477 |
| CCDC78    | 22.7071517 | -0.9608463 | 0.01008316 | 0.15128527 |
| HCFC1     | 2466.20267 | -0.3690178 | 0.01011933 | 0.15128527 |
| HECTD4    | 5405.77221 | -0.4466255 | 0.01007055 | 0.15128527 |
| LARP1     | 4796.76754 | -0.4488413 | 0.01010172 | 0.15128527 |
| LOC151475 | 10.885035  | 1.20900978 | 0.01003731 | 0.15128527 |
| MEF2BNB   | 103.826471 | -0.4205329 | 0.01006077 | 0.15128527 |
| NXT2      | 120.969605 | 0.58872075 | 0.01005334 | 0.15128527 |
| P2RY14    | 67.5285175 | 1.20230807 | 0.01011682 | 0.15128527 |
| SCD       | 1827.3229  | -1.0532735 | 0.01010302 | 0.15128527 |
| TERC      | 611.114088 | -0.7976235 | 0.01004399 | 0.15128527 |
| TJP3      | 43.9346563 | -1.1170133 | 0.01007351 | 0.15128527 |
| VENTX     | 137.081066 | 1.0894644  | 0.01008677 | 0.15128527 |
| ANGPTL7   | 122.80334  | 1.08941026 | 0.01015902 | 0.15174822 |
| GALR1     | 4.29222708 | -1.151156  | 0.01017377 | 0.15183802 |
| ERCC6L    | 12.7929458 | -0.9415923 | 0.01019209 | 0.15198103 |
| LAMC2     | 62.4795192 | -1.100929  | 0.01022459 | 0.15207437 |
| SMIM14    | 684.613848 | 0.59700162 | 0.01022454 | 0.15207437 |
| UBE2Q2P2  | 4.73681831 | -1.072153  | 0.01021387 | 0.15207437 |
| ZMYND15   | 91.602034  | 0.85348539 | 0.01027697 | 0.15272276 |
| FBXO48    | 13.4513328 | 0.83773032 | 0.01031617 | 0.15317441 |
| WDR11-AS1 | 6.33752247 | 1.11688337 | 0.01033548 | 0.15319941 |
| ZMYM6NB   | 161.763544 | 0.5694422  | 0.01033251 | 0.15319941 |
| RASGRP1   | 27.7195293 | 1.03072096 | 0.01035532 | 0.15336288 |
| SLITRK5   | 5.0040401  | -1.2021901 | 0.01036498 | 0.15337519 |
| BIRC2     | 1165.11445 | 0.30522632 | 0.01039417 | 0.15351971 |
| BLM       | 42.6677178 | -0.920692  | 0.01038958 | 0.15351971 |
| EPS8L2    | 657.689184 | -0.7194229 | 0.01041737 | 0.15351971 |
| PLCB1     | 864.266921 | 1.17265443 | 0.01042298 | 0.15351971 |
| PMVK      | 229.200788 | -0.585291  | 0.01040994 | 0.15351971 |
| RANBP10   | 491.958005 | -0.474661  | 0.01042772 | 0.15351971 |
| RAP2C-AS1 | 75.4980512 | 0.65080201 | 0.01048605 | 0.15424779 |
| CHEK1     | 74.5853897 | -0.7613636 | 0.01059425 | 0.15457468 |
| CYP4Z1    | 99.7157804 | 0.92687073 | 0.01055841 | 0.15457468 |
| MOB3B     | 217.786822 | 1.0763301  | 0.01057669 | 0.15457468 |
| NPLOC4    | 1446.5964  | -0.3745012 | 0.01061409 | 0.15457468 |
| PARP14    | 2544.5395  | 0.26444493 | 0.01057179 | 0.15457468 |
| RAB7A     | 2604.94738 | -0.4128879 | 0.01061495 | 0.15457468 |
| RBFADN    | 7.79072187 | 1.04768702 | 0.01058145 | 0.15457468 |
| RGL1      | 1499.66731 | 0.70651893 | 0.01060265 | 0.15457468 |
| SIVA1     | 215.232726 | 0.44166397 | 0.01057727 | 0.15457468 |
| TCP10L    | 21.628993  | 0.9209895  | 0.01055665 | 0.15457468 |
| XRRA1     | 436.472486 | -0.6900179 | 0.01059282 | 0.15457468 |
| ZNF394    | 328.698202 | 0.3329492  | 0.01058426 | 0.15457468 |
| CD3E      | 13.8523911 | 1.03852142 | 0.01064487 | 0.15475849 |
| SF1       | 2377.66236 | -0.4302568 | 0.01064538 | 0.15475849 |



|           |            |            |            |            |
|-----------|------------|------------|------------|------------|
| FAM87A    | 1.60410609 | 1.20068698 | 0.01067288 | 0.15489936 |
| PIK3IP1   | 636.93926  | 0.77997366 | 0.01066887 | 0.15489936 |
| RELL2     | 70.0476919 | -0.924645  | 0.01068204 | 0.1549029  |
| CEACAM6   | 8.00245756 | -1.1625295 | 0.01071192 | 0.15509559 |
| TRG-AS1   | 9.62726025 | 1.05662363 | 0.01071316 | 0.15509559 |
| SPATA41   | 15.7096963 | -0.8116362 | 0.01073622 | 0.15517093 |
| ZSCAN12   | 385.420625 | -0.3913698 | 0.01073413 | 0.15517093 |
| ODF2      | 740.308082 | -0.2989179 | 0.01077655 | 0.1554954  |
| ZNF414    | 101.52742  | -0.6629451 | 0.01077524 | 0.1554954  |
| BTLA      | 4.12232135 | 1.0475676  | 0.01079275 | 0.15559997 |
| ANKRA2    | 276.335794 | 0.45423869 | 0.0108377  | 0.15611857 |
| CH25H     | 52.2681297 | 1.11314868 | 0.01085896 | 0.15627996 |
| HMBS      | 116.782842 | -0.7950866 | 0.01086895 | 0.15627996 |
| SUGP1     | 347.722632 | -0.2980373 | 0.01087587 | 0.15627996 |
| C7orf13   | 47.5905302 | -1.0246094 | 0.01088705 | 0.1563114  |
| FXYD1     | 374.310114 | 0.76412908 | 0.01095708 | 0.15633688 |
| LSMEM1    | 17.7610936 | 0.80736155 | 0.01093845 | 0.15633688 |
| MYOZ1     | 44.0574581 | 1.20250401 | 0.0109686  | 0.15633688 |
| OSGIN1    | 21.2605267 | 1.07297384 | 0.01094004 | 0.15633688 |
| SPNS3     | 20.0993753 | 1.16988814 | 0.01093483 | 0.15633688 |
| SRGN      | 1619.40024 | 0.77603455 | 0.01096975 | 0.15633688 |
| SUPT6H    | 2507.18533 | -0.2408909 | 0.01094455 | 0.15633688 |
| USP18     | 36.5368904 | 0.78679219 | 0.01093318 | 0.15633688 |
| ZER1      | 990.879811 | -0.2867667 | 0.01096447 | 0.15633688 |
| COQ4      | 359.362809 | -0.3926853 | 0.01099731 | 0.1566013  |
| HSCB      | 41.9657516 | 0.54340226 | 0.01106356 | 0.15741582 |
| NDUFA10   | 818.551784 | -0.335348  | 0.01108989 | 0.15766144 |
| ESCO2     | 24.3651731 | -0.8856309 | 0.01112075 | 0.15784196 |
| SLAMF6    | 13.7847419 | 1.09645205 | 0.01111612 | 0.15784196 |
| METTL3    | 392.065755 | 0.51639387 | 0.01114658 | 0.15807963 |
| TP63      | 932.19699  | -1.2017513 | 0.01117306 | 0.15832606 |
| IL11RA    | 421.881555 | 0.96711979 | 0.01122369 | 0.15891399 |
| ACSM5     | 46.7471534 | 1.01379097 | 0.01127412 | 0.15916827 |
| ADAMTS17  | 703.936395 | -0.9937085 | 0.01127827 | 0.15916827 |
| RAB3A     | 41.6775145 | -0.833868  | 0.01126823 | 0.15916827 |
| USP53     | 4851.49661 | 0.67096267 | 0.01127581 | 0.15916827 |
| RICTOR    | 1326.46633 | 0.39507509 | 0.01129243 | 0.1592388  |
| EIF2B3    | 189.10403  | 0.593571   | 0.01132283 | 0.15953819 |
| GTF2H5    | 335.690733 | 0.44967994 | 0.01133943 | 0.15963514 |
| SLFN13    | 330.636284 | -0.8800623 | 0.01134808 | 0.15963514 |
| SH3PXD2A  | 10222.0726 | -0.6107023 | 0.01138662 | 0.1600478  |
| PHRF1     | 1270.1884  | -0.3435798 | 0.01142409 | 0.16044476 |
| TMEM220-A | 2.92202369 | 1.12152177 | 0.01143932 | 0.16052895 |
| SUMO4     | 33.3619673 | 0.57298223 | 0.01145749 | 0.1606543  |
| CCDC144A  | 209.782176 | -1.1674793 | 0.01148895 | 0.16083609 |
| TBC1D8    | 2765.79114 | -0.8473267 | 0.01148601 | 0.16083609 |
| CDADC1    | 144.777075 | 0.48252786 | 0.01150337 | 0.16090838 |
| DOCK7     | 1010.84801 | 0.51407094 | 0.01155963 | 0.16093371 |
| PDE1B     | 67.8933641 | 0.70583663 | 0.01154858 | 0.16093371 |
| POM121C   | 794.854968 | -0.4606332 | 0.01153932 | 0.16093371 |

|            |            |            |            |            |
|------------|------------|------------|------------|------------|
| PRRG3      | 9.26512699 | -1.1937274 | 0.01156072 | 0.16093371 |
| SRRT       | 1005.42359 | -0.356287  | 0.01155004 | 0.16093371 |
| TBX1       | 14.2111524 | -1.1842009 | 0.01153555 | 0.16093371 |
| FN3K       | 132.749316 | -0.7115957 | 0.01158076 | 0.16095502 |
| TRAPPC2    | 234.527915 | 0.49605228 | 0.01157801 | 0.16095502 |
| FAM73A     | 560.649247 | 0.46539849 | 0.01163368 | 0.16117513 |
| GNAI3      | 817.259588 | 0.50466268 | 0.01161791 | 0.16117513 |
| PAICS      | 1134.75443 | -0.6693982 | 0.01162983 | 0.16117513 |
| PRC1       | 346.44825  | -0.8093184 | 0.01162216 | 0.16117513 |
| LOC1005065 | 33.648286  | 1.02894222 | 0.01165464 | 0.16133696 |
| PMPCA      | 466.159141 | -0.3596346 | 0.01167783 | 0.16152943 |
| ANP32B     | 1059.09231 | -0.762596  | 0.0116993  | 0.16156934 |
| MEX3B      | 27.7571941 | -0.8295444 | 0.01169045 | 0.16156934 |
| PAPPA      | 968.776248 | 1.17687927 | 0.01174047 | 0.16200911 |
| BSDC1      | 885.18238  | 0.41551077 | 0.01177687 | 0.16238265 |
| CD19       | 2.36897488 | 1.1589703  | 0.01181134 | 0.16272531 |
| CREG1      | 1281.58627 | 0.39779949 | 0.01183948 | 0.16272531 |
| HHATL      | 2.45751574 | -1.1399832 | 0.01183478 | 0.16272531 |
| SLC7A1     | 582.253997 | -1.1244927 | 0.01184852 | 0.16272531 |
| TMSB4X     | 6304.6274  | 0.49651132 | 0.01183071 | 0.16272531 |
| BVES       | 138.304628 | 1.0756916  | 0.01195284 | 0.16298159 |
| DEDD       | 367.232065 | -0.2495573 | 0.01194173 | 0.16298159 |
| KCNA3      | 28.7325465 | 0.98121897 | 0.01195288 | 0.16298159 |
| MGRN1      | 1031.32358 | -0.3483598 | 0.01195301 | 0.16298159 |
| PCDH10     | 9.26158839 | -1.1896242 | 0.01194462 | 0.16298159 |
| PCDHGA7    | 436.531653 | -0.7361225 | 0.01196092 | 0.16298159 |
| PGP        | 290.854353 | -0.4747362 | 0.01191667 | 0.16298159 |
| RFXAP      | 156.130525 | -0.4746134 | 0.01194867 | 0.16298159 |
| SERINC1    | 5438.76693 | 0.40410873 | 0.01192962 | 0.16298159 |
| TMEM200A   | 7.68620266 | 1.10010312 | 0.01188615 | 0.16298159 |
| CNPY4      | 300.649113 | 0.58384985 | 0.01198604 | 0.16300346 |
| TARBP1     | 1214.5507  | 0.6109109  | 0.01197853 | 0.16300346 |
| UBASH3A    | 3.37158858 | 1.19531337 | 0.01199065 | 0.16300346 |
| CCDC147    | 7.2248508  | 1.04171358 | 0.01203603 | 0.16321    |
| CETN4P     | 1.86146031 | 1.19388706 | 0.01205278 | 0.16321    |
| FRY        | 722.262343 | 1.04396862 | 0.01201559 | 0.16321    |
| LOC1019291 | 7.748513   | 0.79114692 | 0.01205049 | 0.16321    |
| PDIA2      | 16.3686519 | 1.13365187 | 0.01203913 | 0.16321    |
| ANKRD22    | 125.129426 | 1.16024775 | 0.0121089  | 0.16335125 |
| FAM134A    | 1384.80764 | -0.3972345 | 0.01209131 | 0.16335125 |
| PCGF2      | 463.201876 | -0.4234541 | 0.01208158 | 0.16335125 |
| STRADA     | 516.153922 | -0.4006634 | 0.01211134 | 0.16335125 |
| TPGS1      | 57.2631202 | -0.5869432 | 0.01211958 | 0.16335125 |
| ZC2HC1C    | 151.855844 | 1.04583252 | 0.01211307 | 0.16335125 |
| DVL3       | 1348.68604 | -0.3257433 | 0.01219926 | 0.16384216 |
| EMR3       | 5.56927621 | 1.1848634  | 0.01218018 | 0.16384216 |
| RRP7A      | 387.24887  | 0.37716469 | 0.0121693  | 0.16384216 |
| SRSF10     | 82.7831157 | 0.54623178 | 0.01220312 | 0.16384216 |
| TRIM38     | 879.146358 | 0.24409589 | 0.01219279 | 0.16384216 |
| LOC1027237 | 2.04884415 | 1.18821209 | 0.01221803 | 0.16391583 |

|           |            |            |            |            |
|-----------|------------|------------|------------|------------|
| AMN1      | 87.0127806 | 0.43255944 | 0.01229942 | 0.16475785 |
| PIEZO1    | 4003.02899 | -0.5275182 | 0.01229975 | 0.16475785 |
| ASGR2     | 4.16391869 | 1.10205947 | 0.01233528 | 0.16510666 |
| TATDN2    | 1110.31089 | -0.446087  | 0.01236351 | 0.16535725 |
| PCDHGC5   | 193.8909   | -0.7208168 | 0.01241619 | 0.16593412 |
| SLFN12L   | 8.12008473 | 1.02582644 | 0.01245059 | 0.16626608 |
| LINC01085 | 2.11243231 | 1.18145405 | 0.01248655 | 0.16651208 |
| NME2      | 264.517116 | -0.6793119 | 0.01248817 | 0.16651208 |
| UNC80     | 126.894466 | -1.1329483 | 0.01251117 | 0.16669096 |
| RAB32     | 131.309679 | 0.51841132 | 0.01252566 | 0.16675619 |
| AFAP1     | 3280.65422 | -0.6747229 | 0.01258312 | 0.16688636 |
| CALD1     | 5665.91243 | 0.53606676 | 0.01260275 | 0.16688636 |
| HIST2H3D  | 32.2290831 | -0.7439196 | 0.01261222 | 0.16688636 |
| MKRN7P    | 20.9857972 | 0.95096741 | 0.01258002 | 0.16688636 |
| SLC6A4    | 157.633745 | 1.18515365 | 0.01260274 | 0.16688636 |
| STK32A    | 208.326164 | 1.17003551 | 0.01255765 | 0.16688636 |
| TMSB15A   | 3.87857309 | -1.0908803 | 0.01257445 | 0.16688636 |
| ZNF383    | 122.914451 | 0.42470869 | 0.01259339 | 0.16688636 |
| ELL2      | 951.448304 | 0.86084364 | 0.01264641 | 0.16694396 |
| ICOS      | 2.51360007 | 1.17222437 | 0.01265746 | 0.16694396 |
| PPFIBP1   | 10306.5223 | -0.8263218 | 0.01265085 | 0.16694396 |
| SCARNA16  | 118.581361 | -0.7471296 | 0.01265369 | 0.16694396 |
| SLFNL1    | 5.7795162  | 1.0739411  | 0.01266458 | 0.16694396 |
| CCDC81    | 19.4586089 | 1.04514057 | 0.01269407 | 0.16695716 |
| NOTUM     | 2.68912242 | -1.133995  | 0.01269439 | 0.16695716 |
| PNPLA2    | 693.748431 | -0.5871226 | 0.01267938 | 0.16695716 |
| ACAP2     | 1959.97349 | 0.19089727 | 0.01278611 | 0.16702634 |
| CASS4     | 105.668904 | 1.01611028 | 0.01276415 | 0.16702634 |
| GOT1      | 463.656203 | -0.8053855 | 0.01276444 | 0.16702634 |
| IRF2BP1   | 335.756416 | -0.3726382 | 0.01272563 | 0.16702634 |
| PDE4DIP   | 1047.9932  | 0.76007764 | 0.01274817 | 0.16702634 |
| PSMC5     | 848.868551 | -0.3936374 | 0.01277966 | 0.16702634 |
| PTOV1     | 1089.25517 | -0.2784454 | 0.01273959 | 0.16702634 |
| SFRP2     | 31319.6044 | 1.07349819 | 0.01277335 | 0.16702634 |
| TBKBP1    | 297.469658 | -0.365871  | 0.01273927 | 0.16702634 |
| SAMD3     | 6.43837634 | 1.14979047 | 0.01281447 | 0.16727116 |
| FAM157B   | 1.93367816 | 1.18270245 | 0.01289289 | 0.16741502 |
| FBLN1     | 2502.60624 | 1.18300938 | 0.01288746 | 0.16741502 |
| GABRA5    | 2.5907835  | -1.183573  | 0.01285771 | 0.16741502 |
| GPAA1     | 945.770273 | -0.4578624 | 0.01287303 | 0.16741502 |
| NNT       | 2073.09638 | -0.5039758 | 0.01288499 | 0.16741502 |
| TTBK1     | 7.05324183 | -1.1240889 | 0.01284416 | 0.16741502 |
| ZDHHC13   | 163.277339 | -0.6608369 | 0.01288107 | 0.16741502 |
| PCDHGB4   | 398.068348 | -0.8173902 | 0.01291803 | 0.16761627 |
| HIST1H2AD | 19.8265023 | 0.61149708 | 0.01294306 | 0.1676907  |
| PMS2      | 354.769219 | -0.3101954 | 0.01294183 | 0.1676907  |
| AP2B1     | 5016.72262 | -0.4547853 | 0.01297701 | 0.16770265 |
| CSNK2A3   | 11.6462684 | -1.0661971 | 0.01296282 | 0.16770265 |
| GLIPR1    | 718.27556  | 0.52990127 | 0.01300884 | 0.16770265 |
| KCNG2     | 5.26004572 | -1.1805233 | 0.01300088 | 0.16770265 |

|           |            |            |            |            |
|-----------|------------|------------|------------|------------|
| POLR3GL   | 284.987901 | 0.38339126 | 0.0130115  | 0.16770265 |
| SLC16A13  | 33.7583934 | -0.8509023 | 0.01297273 | 0.16770265 |
| ZBTB46    | 532.400721 | -0.7449609 | 0.01298313 | 0.16770265 |
| RNF133    | 20.5821498 | -0.9660345 | 0.01305673 | 0.168161   |
| PAQR6     | 97.8407192 | -1.0232668 | 0.01307045 | 0.16821309 |
| DCAF7     | 2479.18854 | -0.4493869 | 0.01309432 | 0.16839165 |
| TRAPPC9   | 739.277489 | -0.4148361 | 0.01310369 | 0.16839165 |
| ZDHHC5    | 1656.70847 | -0.4558907 | 0.01312702 | 0.16856689 |
| C8orf82   | 175.61262  | -0.6325059 | 0.01314533 | 0.16867739 |
| HAPLN3    | 74.358028  | 1.05226951 | 0.01320616 | 0.16896399 |
| HLA-DQA1  | 403.843569 | 1.15140411 | 0.01320654 | 0.16896399 |
| KMO       | 19.0951192 | 0.99114378 | 0.01319562 | 0.16896399 |
| POLR1A    | 1194.32826 | -0.3986532 | 0.01317972 | 0.16896399 |
| USP43     | 49.8484437 | -0.9964045 | 0.01322236 | 0.16904203 |
| C19orf24  | 171.106667 | -0.4273619 | 0.01325392 | 0.16907547 |
| CD5       | 8.26073233 | 1.09998643 | 0.01325415 | 0.16907547 |
| MALAT1    | 517211.071 | -0.5053933 | 0.01324893 | 0.16907547 |
| TBC1D8B   | 187.339731 | 0.58665457 | 0.01327207 | 0.16918001 |
| ENOX2     | 146.092369 | 0.43444876 | 0.01329706 | 0.16937436 |
| PFKM      | 2603.579   | -0.5030221 | 0.01331003 | 0.16941545 |
| CCDC117   | 289.691987 | 0.47175704 | 0.01332376 | 0.1694662  |
| SCRT1     | 1.50918684 | -1.0721162 | 0.01335311 | 0.16960053 |
| TAS2R20   | 90.4845316 | 0.41263919 | 0.01335383 | 0.16960053 |
| LOC613037 | 27.773497  | 0.82547046 | 0.01342169 | 0.17033785 |
| GPA33     | 2.25003689 | 1.09086631 | 0.01347449 | 0.17088328 |
| ACO2      | 1307.32586 | -0.6046198 | 0.01358058 | 0.17122957 |
| ASAP3     | 999.610095 | 0.72034743 | 0.01353677 | 0.17122957 |
| CTBS      | 342.146294 | 0.53814741 | 0.01355321 | 0.17122957 |
| DUT       | 588.856905 | 0.33203134 | 0.01355511 | 0.17122957 |
| FEN1      | 221.938506 | -0.5247579 | 0.0135445  | 0.17122957 |
| HPR       | 31.0786999 | 1.02442641 | 0.01357201 | 0.17122957 |
| SKA3      | 32.5153125 | -0.9458187 | 0.01357537 | 0.17122957 |
| TBX21     | 4.46263379 | 1.12332689 | 0.01354409 | 0.17122957 |
| CRHR1     | 2.72163918 | 1.17025111 | 0.01363111 | 0.17165528 |
| SYT10     | 1.6567405  | -1.1412244 | 0.01363409 | 0.17165528 |
| ASS1      | 3387.66637 | -0.7985742 | 0.01364749 | 0.17169963 |
| RGS9BP    | 3.42207909 | -1.1318092 | 0.01367602 | 0.17193412 |
| CAPN6     | 186.362762 | -1.1635225 | 0.01371472 | 0.1722598  |
| SRP68     | 974.617948 | -0.5330505 | 0.01372174 | 0.1722598  |
| NAA35     | 360.248431 | -0.2891684 | 0.01373995 | 0.17236403 |
| PRR12     | 903.593117 | -0.4544463 | 0.01377523 | 0.1725839  |
| UPK3BL    | 47.3857284 | -0.7278565 | 0.01377733 | 0.1725839  |
| GPR98     | 21.2176588 | -1.1563273 | 0.01379351 | 0.17266218 |
| MFSD6L    | 1.71545815 | 1.17073481 | 0.01380755 | 0.17271356 |
| AUNIP     | 4.28476668 | -1.077138  | 0.01384666 | 0.17295384 |
| LRIT3     | 9.7193576  | 0.95670218 | 0.01384875 | 0.17295384 |
| MRPS2     | 264.739895 | -0.4184522 | 0.0138566  | 0.17295384 |
| CHRN2     | 13.4658606 | -1.0715257 | 0.0138974  | 0.17303404 |
| LRRC8A    | 915.693983 | -0.4613285 | 0.01388042 | 0.17303404 |
| MYBPC2    | 12.7973607 | -1.1235327 | 0.01388654 | 0.17303404 |

|           |            |            |            |            |
|-----------|------------|------------|------------|------------|
| ST8SIA4   | 349.045669 | 0.63597826 | 0.01390283 | 0.17303404 |
| B9D2      | 29.4041227 | 0.75227922 | 0.01397449 | 0.1735467  |
| DPM3      | 116.665494 | -0.5296622 | 0.01398314 | 0.1735467  |
| HMGA2     | 40.956061  | -1.1692166 | 0.01398395 | 0.1735467  |
| LINC00667 | 475.666239 | 0.51126568 | 0.0139641  | 0.1735467  |
| ADORA1    | 8.52211296 | -0.9560396 | 0.01399454 | 0.17355421 |
| RPS14     | 5711.49364 | 0.45457329 | 0.0140236  | 0.17379064 |
| KIAA0226L | 95.3057597 | 0.90843464 | 0.0140678  | 0.17380721 |
| NOXRED1   | 7.44322383 | 0.89341831 | 0.0140845  | 0.17380721 |
| TBC1D2B   | 1709.25511 | 0.42837484 | 0.01405037 | 0.17380721 |
| TGM4      | 5.92681025 | -1.164403  | 0.01408081 | 0.17380721 |
| ZNF559    | 453.204436 | 0.47286801 | 0.01408491 | 0.17380721 |
| ZNRF2P1   | 37.9996369 | -0.7149621 | 0.01406134 | 0.17380721 |
| PTCH1     | 405.595585 | -0.8477653 | 0.014104   | 0.1739193  |
| C10orf35  | 20.3861996 | -0.9802382 | 0.01420703 | 0.17441642 |
| CDCA2     | 70.5595493 | -1.0786497 | 0.01423072 | 0.17441642 |
| CENPN     | 122.251268 | -0.8414737 | 0.01420597 | 0.17441642 |
| FTCD      | 4.67842612 | -1.1629763 | 0.01422146 | 0.17441642 |
| MAP3K8    | 314.891156 | 0.7269678  | 0.01418468 | 0.17441642 |
| NABP1     | 295.171308 | 0.88623189 | 0.01422404 | 0.17441642 |
| NRIP3     | 22.3134265 | 1.13808655 | 0.01423459 | 0.17441642 |
| PJA1      | 469.152276 | 0.43418358 | 0.01421682 | 0.17441642 |
| RNF13     | 1338.1564  | 0.27432799 | 0.01416857 | 0.17441642 |
| UBALD1    | 156.210386 | -0.5898085 | 0.01426407 | 0.17465448 |
| SMC4      | 983.112079 | -0.6959869 | 0.01430055 | 0.17494947 |
| XCL1      | 2.33644077 | 1.155053   | 0.01430828 | 0.17494947 |
| MNDA      | 203.889638 | 0.87225944 | 0.01433437 | 0.1751453  |
| COPS6     | 724.536523 | -0.4328385 | 0.01439502 | 0.17556241 |
| HSD17B13  | 3.33237242 | 1.06519678 | 0.01438471 | 0.17556241 |
| PRSS16    | 11.2831081 | -1.0959091 | 0.0143988  | 0.17556241 |
| SLC25A23  | 1525.64488 | -0.5927992 | 0.01444911 | 0.17605239 |
| SAFB2     | 837.652444 | -0.4298334 | 0.01449138 | 0.17625227 |
| TMEM219   | 677.802363 | 0.2977458  | 0.01449593 | 0.17625227 |
| ZBTB45    | 130.124654 | -0.451981  | 0.01447832 | 0.17625227 |
| POLR2D    | 387.657036 | -0.2811384 | 0.01454765 | 0.17675755 |
| TAF15     | 779.280803 | -0.486454  | 0.0145967  | 0.17722965 |
| SLC22A20  | 9.20505104 | -1.0474038 | 0.01461642 | 0.17734517 |
| RPAP2     | 271.778985 | 0.43673027 | 0.01464604 | 0.1775807  |
| FAHD2A    | 130.301695 | 0.51822359 | 0.01479805 | 0.17860773 |
| GRIN2C    | 9.06999783 | -0.9387617 | 0.01479438 | 0.17860773 |
| LOC283683 | 32.5897722 | 1.11181688 | 0.01478237 | 0.17860773 |
| MFSD3     | 116.259356 | -0.5944656 | 0.01481293 | 0.17860773 |
| NAT10     | 917.560944 | -0.4476666 | 0.01480754 | 0.17860773 |
| OMA1      | 236.501145 | 0.47918563 | 0.01476361 | 0.17860773 |
| SNORA23   | 227.184007 | -0.5204034 | 0.01479511 | 0.17860773 |
| SQLE      | 374.188337 | -0.7941936 | 0.01475605 | 0.17860773 |
| PTPRZ1    | 12.7713193 | -1.1473378 | 0.01482408 | 0.17861834 |
| ABCF3     | 637.530067 | -0.258424  | 0.01484187 | 0.17870882 |
| ABCC6     | 16.4896135 | 1.05451538 | 0.01492162 | 0.17892562 |
| DDX39A    | 347.405299 | -0.4302479 | 0.01490045 | 0.17892562 |

|            |            |            |            |            |
|------------|------------|------------|------------|------------|
| IGF2BP2    | 416.80574  | -1.1510982 | 0.01491235 | 0.17892562 |
| KCNIP1     | 29.9068144 | -1.1529329 | 0.0148739  | 0.17892562 |
| METTL10    | 276.94677  | 0.50214526 | 0.01491966 | 0.17892562 |
| TAF6       | 477.408677 | -0.3761622 | 0.01490342 | 0.17892562 |
| CS         | 2063.50982 | -0.4097896 | 0.01496326 | 0.17930133 |
| DAO        | 2.70350094 | 1.02702124 | 0.01500773 | 0.17959447 |
| EPN3       | 22.3068063 | -1.1533094 | 0.01502904 | 0.17959447 |
| LOC1001336 | 3.67237557 | 1.11897096 | 0.0150152  | 0.17959447 |
| SDHC       | 785.760084 | -0.4706286 | 0.01501917 | 0.17959447 |
| EI24       | 959.016557 | -0.295224  | 0.0150807  | 0.18008803 |
| COMTD1     | 31.6493117 | -0.7250692 | 0.01510134 | 0.18021074 |
| NEB        | 704.185113 | 0.95883238 | 0.01513872 | 0.18053283 |
| TNK1       | 83.5893021 | -0.7633907 | 0.01515122 | 0.18055811 |
| DOCK10     | 685.79726  | 0.81011484 | 0.01523434 | 0.18142433 |
| FLJ31104   | 8.34937624 | 0.88364977 | 0.01524722 | 0.18145337 |
| LOC1009965 | 7.41638425 | -1.0895712 | 0.01527475 | 0.18165665 |
| ZNF25      | 419.466547 | 0.58230736 | 0.01529585 | 0.1817833  |
| SLC6A3     | 154.287986 | -1.1496523 | 0.01533059 | 0.18207175 |
| MYL12A     | 2126.1642  | 0.48449133 | 0.01534828 | 0.18215737 |
| PI4KB      | 1417.54572 | -0.2401294 | 0.01538344 | 0.18245012 |
| BTNL9      | 982.117681 | -0.9410668 | 0.01539917 | 0.18251215 |
| ROBO3      | 179.496297 | 1.04147704 | 0.01541846 | 0.18261633 |
| C2orf15    | 15.9208483 | -0.8671911 | 0.01543209 | 0.18265331 |
| SMPD4      | 685.919526 | -0.2753414 | 0.01545541 | 0.18280491 |
| BLNK       | 205.852261 | 0.80467795 | 0.01549999 | 0.18283465 |
| C5orf49    | 3.65264342 | 1.13069192 | 0.0154999  | 0.18283465 |
| KCNH1      | 11.5915859 | -1.0807278 | 0.01549854 | 0.18283465 |
| SLC37A4    | 225.217709 | -0.4050251 | 0.01547849 | 0.18283465 |
| KCTD2      | 821.354827 | -0.4099064 | 0.01553825 | 0.18303758 |
| LEAP2      | 3.49837654 | 1.03275487 | 0.01553732 | 0.18303758 |
| DNMT3A     | 701.854445 | -0.4725667 | 0.01556513 | 0.18310614 |
| LOC1019282 | 3.44305196 | -1.135925  | 0.01555469 | 0.18310614 |
| C19orf48   | 294.411674 | -0.4243307 | 0.01559075 | 0.18328361 |
| PRRT3      | 91.6150895 | -0.7452494 | 0.01562261 | 0.18353404 |
| TSTD3      | 63.2364623 | 0.73284722 | 0.01563822 | 0.18359335 |
| CES3       | 22.1203481 | 1.02427351 | 0.01566588 | 0.18379401 |
| COX6B2     | 4.89335354 | -1.1468595 | 0.0157073  | 0.1841556  |
| CAP1       | 2371.90794 | 0.42432981 | 0.01573693 | 0.18425453 |
| THAP4      | 435.310782 | -0.2919158 | 0.0157315  | 0.18425453 |
| MSS51      | 98.1073984 | 0.67483052 | 0.01580466 | 0.18492303 |
| RNF182     | 6.85710365 | -1.1469258 | 0.01588382 | 0.18572427 |
| CHAF1A     | 169.218385 | -0.666102  | 0.01592351 | 0.1860632  |
| GRM3       | 11.4956089 | -1.1374406 | 0.01596554 | 0.18642908 |
| LACC1      | 228.301674 | 0.54055691 | 0.01599089 | 0.18659977 |
| RBM4       | 728.764555 | -0.3701869 | 0.01603722 | 0.18701481 |
| SSTR5-AS1  | 2.14356812 | -1.1166227 | 0.01605984 | 0.18715306 |
| FITM2      | 109.434761 | -0.5307921 | 0.01607424 | 0.18719541 |
| ITGAX      | 455.045449 | 0.92606638 | 0.01609079 | 0.1872628  |
| ACSL1      | 1056.03906 | 0.72512212 | 0.01623819 | 0.1873922  |
| CCR5       | 65.0582348 | 0.99330811 | 0.01612224 | 0.1873922  |

|            |            |            |            |            |
|------------|------------|------------|------------|------------|
| COMMD2     | 641.403255 | 0.4450997  | 0.01627436 | 0.1873922  |
| FAM86C1    | 51.3468536 | -0.5634412 | 0.01617634 | 0.1873922  |
| GLTSCR1    | 210.451893 | -0.7377625 | 0.01624873 | 0.1873922  |
| HPS5       | 881.543494 | 0.58881881 | 0.01625165 | 0.1873922  |
| KLK5       | 7.32857935 | -1.0499592 | 0.01623049 | 0.1873922  |
| NCF4       | 123.715603 | 0.77018404 | 0.01614381 | 0.1873922  |
| NRCAM      | 40.3345165 | -1.1018349 | 0.01626107 | 0.1873922  |
| PCDHGB7    | 892.987703 | -0.8027306 | 0.01612816 | 0.1873922  |
| PRKAG2-AS1 | 12.2358975 | 1.00299524 | 0.01626655 | 0.1873922  |
| RASSF2     | 6024.07386 | 0.91075672 | 0.0161871  | 0.1873922  |
| RLF        | 589.143563 | 0.5387284  | 0.01618821 | 0.1873922  |
| SEN7       | 894.668701 | 0.35986602 | 0.01625784 | 0.1873922  |
| TLCD1      | 13.2609508 | -1.0041464 | 0.016217   | 0.1873922  |
| WDR11      | 1458.77934 | 0.48475314 | 0.01615811 | 0.1873922  |
| CABIN1     | 1078.29729 | 0.33600993 | 0.01628886 | 0.18743504 |
| MINOS1P1   | 196.476316 | 0.47437658 | 0.01632873 | 0.18764549 |
| SYMPK      | 1140.62695 | -0.3045909 | 0.01632427 | 0.18764549 |
| ABCB6      | 437.081678 | -0.4326825 | 0.01641295 | 0.18790826 |
| AKR1B10    | 24.9980425 | 1.14062085 | 0.01641592 | 0.18790826 |
| ATP5D      | 485.750065 | -0.5848239 | 0.01643806 | 0.18790826 |
| CLIC3      | 195.948641 | -1.0202733 | 0.01638594 | 0.18790826 |
| DFNB31     | 192.773908 | -0.747445  | 0.01638825 | 0.18790826 |
| LOC1005073 | 2.50191083 | -1.132414  | 0.01642745 | 0.18790826 |
| NT5C1A     | 15.6317329 | 1.1384546  | 0.01641328 | 0.18790826 |
| RPGRIP1    | 9.92410529 | 1.04235924 | 0.0164359  | 0.18790826 |
| DNM1       | 64.5215266 | -0.9113088 | 0.01645401 | 0.18796704 |
| CALCR      | 8.57697787 | 1.07072298 | 0.01651972 | 0.18809984 |
| EPPK1      | 1089.65394 | -1.1078982 | 0.01649693 | 0.18809984 |
| LOC399715  | 60.3839193 | 0.88655092 | 0.01651797 | 0.18809984 |
| LPPR2      | 1176.77495 | -0.4982927 | 0.01650818 | 0.18809984 |
| PDIA5      | 163.556368 | 0.50264791 | 0.01649132 | 0.18809984 |
| PIK3R6     | 27.2678802 | 0.72385608 | 0.01653801 | 0.18818483 |
| ATP8A1     | 992.608097 | -0.8345749 | 0.01657716 | 0.18826064 |
| RHPN1-AS1  | 2.42737368 | -1.0516708 | 0.01657102 | 0.18826064 |
| TRAT1      | 3.94143439 | 1.12162441 | 0.01657221 | 0.18826064 |
| ISY1       | 130.741211 | 0.46304547 | 0.01659599 | 0.18832428 |
| LOC374443  | 314.827597 | 0.58641042 | 0.01660442 | 0.18832428 |
| DNAJB1     | 1920.9973  | 0.63929147 | 0.01662268 | 0.1884084  |
| FBXO8      | 290.793072 | 0.29716836 | 0.01663743 | 0.18845281 |
| SNX22      | 26.3391682 | 0.94099405 | 0.01669728 | 0.1890076  |
| NEK10      | 9.42755327 | 0.95467198 | 0.01674512 | 0.18917955 |
| PIH1D2     | 21.6655313 | -0.685592  | 0.01672817 | 0.18917955 |
| RAMP1      | 27.6680943 | -1.1105047 | 0.01673842 | 0.18917955 |
| SRRD       | 116.69331  | 0.45368991 | 0.01677789 | 0.18942678 |
| C6orf226   | 31.4031886 | -0.6247535 | 0.0168422  | 0.19002942 |
| HID1       | 72.8834107 | -0.9561944 | 0.01689458 | 0.19049682 |
| ATIC       | 675.562003 | -0.7285448 | 0.01691187 | 0.19056817 |
| HERC2      | 3890.14121 | -0.279105  | 0.0169236  | 0.1905768  |
| CACFD1     | 238.992506 | -0.4640635 | 0.0169464  | 0.19071002 |
| E2F1       | 183.77865  | -0.8395974 | 0.01696551 | 0.19080159 |

|          |            |            |            |            |
|----------|------------|------------|------------|------------|
| ARHGAP20 | 3220.22704 | -0.8564474 | 0.01706208 | 0.1911038  |
| ATP5B    | 5600.99872 | -0.5481065 | 0.01702757 | 0.1911038  |
| CDKAL1   | 380.907436 | 0.35826593 | 0.01704586 | 0.1911038  |
| FAM102B  | 438.959412 | 0.60964523 | 0.0170865  | 0.1911038  |
| OIP5     | 8.72995543 | -0.9433605 | 0.0170184  | 0.1911038  |
| PIP4K2A  | 486.775243 | 0.37634484 | 0.01704271 | 0.1911038  |
| PROX1    | 27.2684032 | 0.90818651 | 0.0170952  | 0.1911038  |
| SCARA3   | 4456.38511 | -0.8038482 | 0.01710229 | 0.1911038  |
| TFEC     | 268.844865 | 0.86526918 | 0.01706702 | 0.1911038  |
| TPCN2    | 317.356818 | -0.3373143 | 0.01707049 | 0.1911038  |
| CTGF     | 13665.3728 | 1.03075049 | 0.0171511  | 0.19133894 |
| LRRC42   | 311.022336 | 0.61775557 | 0.01716735 | 0.19133894 |
| MAPK1    | 1988.85738 | 0.30028091 | 0.01714064 | 0.19133894 |
| MPHOSPH6 | 114.52078  | 0.54305119 | 0.01715703 | 0.19133894 |
| ACKR2    | 30.1111343 | 1.0025344  | 0.01732517 | 0.19145563 |
| ACLY     | 2181.29011 | -0.3040585 | 0.01730602 | 0.19145563 |
| ACP2     | 584.593295 | -0.3901762 | 0.01733198 | 0.19145563 |
| ATG13    | 1348.80266 | -0.2963339 | 0.01727515 | 0.19145563 |
| CCND1    | 19967.1935 | -0.7993785 | 0.01723183 | 0.19145563 |
| GTPBP10  | 436.713416 | 0.27787701 | 0.01721605 | 0.19145563 |
| INTS10   | 495.307468 | 0.44230977 | 0.01732125 | 0.19145563 |
| MT3      | 44.8849859 | -1.0798902 | 0.01729119 | 0.19145563 |
| OVGP1    | 45.0434046 | 0.74480726 | 0.01723431 | 0.19145563 |
| RAI1     | 868.637253 | -0.5200545 | 0.01725364 | 0.19145563 |
| SCAMP5   | 285.292929 | -0.8820961 | 0.01728973 | 0.19145563 |
| SEC22A   | 261.621064 | 0.27671166 | 0.01730831 | 0.19145563 |
| SF3B5    | 409.133445 | 0.39578967 | 0.01721411 | 0.19145563 |
| TSEN54   | 119.368107 | -0.4967998 | 0.01726864 | 0.19145563 |
| TLK1     | 1121.6758  | -0.3345975 | 0.01737764 | 0.19183817 |
| BLOC1S3  | 157.194829 | -0.4940881 | 0.0173945  | 0.1919024  |
| ZNF598   | 388.837672 | -0.4643994 | 0.01740775 | 0.19192681 |
| TRIM23   | 506.352714 | 0.33762106 | 0.01742658 | 0.1919626  |
| ZNF711   | 232.514651 | -0.8552239 | 0.01743308 | 0.1919626  |
| FGFR1OP2 | 577.526444 | 0.29571449 | 0.0174699  | 0.19223439 |
| GORAB    | 177.209262 | 0.45684595 | 0.01747987 | 0.19223439 |
| PIGO     | 588.022591 | -0.3664763 | 0.0174925  | 0.1922516  |
| SLA2     | 10.3487425 | 0.87600969 | 0.01755268 | 0.19279116 |
| POLK     | 953.118054 | 0.30203528 | 0.01762566 | 0.19347051 |
| CSTB     | 898.35981  | -0.7513695 | 0.01763943 | 0.19349949 |
| CASP2    | 550.064222 | -0.3915954 | 0.01772541 | 0.19424918 |
| ILDR2    | 236.496739 | 1.12592011 | 0.01774128 | 0.19424918 |
| SIRT1    | 503.372634 | 0.44055795 | 0.01773293 | 0.19424918 |
| BZW2     | 195.374091 | -0.6059189 | 0.01781281 | 0.19458405 |
| CDKN3    | 19.7869369 | -0.905422  | 0.01783719 | 0.19458405 |
| GBA2     | 1186.03805 | -0.3780648 | 0.01785402 | 0.19458405 |
| PATL2    | 9.73952006 | 0.96329975 | 0.0178405  | 0.19458405 |
| SDHAP1   | 518.487196 | -0.5507409 | 0.01784142 | 0.19458405 |
| SLC26A6  | 736.579593 | -0.8780507 | 0.0178614  | 0.19458405 |
| SRPX2    | 15.7824909 | 1.11794584 | 0.01783797 | 0.19458405 |
| TRIM7    | 26.7614931 | 0.98158775 | 0.01782526 | 0.19458405 |



|            |            |            |            |            |
|------------|------------|------------|------------|------------|
| INTS6-AS1  | 30.2287167 | 0.49178985 | 0.01788161 | 0.19468228 |
| C1orf61    | 5.27018462 | -1.0440995 | 0.01789715 | 0.19472955 |
| ABCA1      | 2710.2128  | 0.68773355 | 0.01793348 | 0.19498074 |
| DOCK2      | 756.903144 | 0.75595777 | 0.01795994 | 0.19498074 |
| KIF5A      | 226.378624 | -1.1259126 | 0.01796335 | 0.19498074 |
| SKAP2      | 488.297166 | 0.71707496 | 0.0179651  | 0.19498074 |
| MDH2       | 1288.62729 | -0.4885631 | 0.01797771 | 0.19499592 |
| ACTR6      | 190.377064 | 0.40522564 | 0.0180569  | 0.19514269 |
| CLEC12A    | 16.7587941 | 1.11433031 | 0.01801492 | 0.19514269 |
| EPG5       | 1827.44992 | 0.49014433 | 0.01804255 | 0.19514269 |
| HIST1H4B   | 250.373391 | 0.60581777 | 0.01807306 | 0.19514269 |
| KIF21B     | 187.803962 | 0.75105179 | 0.01802902 | 0.19514269 |
| MRPL24     | 382.777471 | -0.4520213 | 0.01803205 | 0.19514269 |
| NPRL3      | 430.839468 | -0.4471044 | 0.01808103 | 0.19514269 |
| TUBG1      | 383.461482 | -0.5488228 | 0.01806437 | 0.19514269 |
| BMP2       | 47.4909301 | 0.98039928 | 0.01812239 | 0.19546769 |
| LAMA5      | 5585.01242 | -0.8831955 | 0.01819024 | 0.19584568 |
| MRPL54     | 169.432363 | 0.40706951 | 0.0181879  | 0.19584568 |
| SNORA38B   | 12.4094927 | 0.98184428 | 0.01819122 | 0.19584568 |
| ANAPC16    | 853.97322  | 0.4979903  | 0.0182297  | 0.19613848 |
| FES        | 319.943194 | 0.42481216 | 0.0182567  | 0.19630754 |
| GPC3       | 110.988335 | -1.1218105 | 0.01827008 | 0.19632993 |
| HSD17B11   | 408.435192 | 0.51812922 | 0.01828443 | 0.1963628  |
| GLMN       | 83.116912  | 0.68582362 | 0.01832031 | 0.19662671 |
| UBAP2      | 797.449702 | -0.4950695 | 0.01835232 | 0.19684869 |
| AEBP1      | 4884.14427 | 1.04992806 | 0.01839345 | 0.19716823 |
| SCARNA10   | 4433.99956 | 0.39589014 | 0.01841787 | 0.19729815 |
| SPOPL      | 912.912664 | 0.60242475 | 0.01842826 | 0.19729815 |
| CLDN23     | 4.68164198 | 0.96297832 | 0.01851118 | 0.19761212 |
| RGS18      | 86.3581588 | 0.95492831 | 0.01848401 | 0.19761212 |
| SEC31B     | 444.70062  | 0.48402269 | 0.01848723 | 0.19761212 |
| TAS2R10    | 24.4450799 | 0.72881669 | 0.018501   | 0.19761212 |
| TMEM11     | 148.371573 | -0.3892681 | 0.01851442 | 0.19761212 |
| NDUFB2-AS1 | 6.13048241 | -0.9207575 | 0.01857261 | 0.19762662 |
| PCDHGB5    | 579.909784 | -0.9098306 | 0.01854479 | 0.19762662 |
| TNFRSF10A  | 22.0537324 | 0.89392939 | 0.01856724 | 0.19762662 |
| ZFAND5     | 3289.28953 | 0.5996366  | 0.01856215 | 0.19762662 |
| ZFP41      | 383.341293 | -0.4980865 | 0.01855514 | 0.19762662 |
| DSEL       | 611.097607 | 0.70461021 | 0.01858405 | 0.19762749 |
| SHPK       | 390.217852 | -0.3649571 | 0.01865158 | 0.19822431 |
| FBXL18     | 410.955757 | -0.3512331 | 0.01868855 | 0.19849588 |
| INPP5J     | 188.971831 | -0.8246993 | 0.0187151  | 0.19865654 |
| STK16      | 224.077854 | -0.4140773 | 0.0187615  | 0.19902754 |
| IFI27L1    | 48.0921958 | 0.70406199 | 0.01880199 | 0.19921402 |
| TMEM175    | 387.283106 | -0.4384063 | 0.01880165 | 0.19921402 |
| SLC12A8    | 16.6637185 | -0.9705674 | 0.0188782  | 0.1998997  |
| CLN6       | 342.624497 | -0.3616015 | 0.01890946 | 0.19998713 |
| DNAL4      | 103.025928 | 0.56034046 | 0.01889931 | 0.19998713 |
| CDK18      | 213.429492 | -0.7744051 | 0.01893745 | 0.20016135 |
| LMNB2      | 678.346203 | -0.5228833 | 0.01897287 | 0.20029227 |

|            |            |            |            |            |
|------------|------------|------------|------------|------------|
| UBE2Q1     | 836.140839 | -0.2347195 | 0.01896869 | 0.20029227 |
| PQLC3      | 356.8924   | 0.55022388 | 0.019024   | 0.20071017 |
| ATP8B3     | 92.8611495 | -0.8697718 | 0.01910489 | 0.2007449  |
| FBXO31     | 713.013858 | -0.364787  | 0.01908701 | 0.2007449  |
| HTR7       | 20.5064833 | 1.02563025 | 0.01911652 | 0.2007449  |
| MCOLN3     | 14.6077605 | 1.02163996 | 0.01909479 | 0.2007449  |
| NFKBIA     | 2585.72042 | 0.54790364 | 0.01908437 | 0.2007449  |
| OSBPL8     | 1946.56494 | 0.38894605 | 0.01905298 | 0.2007449  |
| TNNI3      | 4.7184326  | -1.115221  | 0.01903985 | 0.2007449  |
| VSIG10     | 272.259493 | -0.5190829 | 0.01911966 | 0.2007449  |
| DHX33      | 432.06263  | -0.4497081 | 0.01916575 | 0.20110735 |
| CECR1      | 447.045644 | 0.82263168 | 0.01917751 | 0.20110934 |
| FBXO46     | 207.039032 | -0.4658394 | 0.01923608 | 0.20111713 |
| FMOD       | 4418.7983  | 0.54991032 | 0.01922066 | 0.20111713 |
| NFAM1      | 144.207476 | 0.86565821 | 0.01919451 | 0.20111713 |
| SPCS2      | 542.791516 | -0.4168308 | 0.01923186 | 0.20111713 |
| ZFAND3     | 1391.49006 | -0.3689104 | 0.01922359 | 0.20111713 |
| STAC2      | 11.7699095 | -1.1093399 | 0.01925194 | 0.20116199 |
| AOAH       | 256.168053 | 0.90072539 | 0.01929212 | 0.20121896 |
| LOC1019276 | 6.29801763 | 1.07087018 | 0.01928409 | 0.20121896 |
| SCAMP3     | 691.406861 | -0.4462246 | 0.01927212 | 0.20121896 |
| SET        | 3991.69927 | -0.369849  | 0.01935741 | 0.2016825  |
| SYCP2      | 112.655948 | 1.05120675 | 0.01935976 | 0.2016825  |
| IFI6       | 667.401381 | 0.64846233 | 0.01938086 | 0.20178141 |
| MAP3K9     | 183.480868 | -0.7079798 | 0.01942373 | 0.20210677 |
| LINC01140  | 4.55691799 | 0.90864555 | 0.01943666 | 0.20212032 |
| CWF19L1    | 305.818563 | 0.41032781 | 0.01946097 | 0.20225222 |
| CNN2       | 914.695212 | 0.82081381 | 0.01949787 | 0.20239376 |
| RNF175     | 6.23939798 | 1.10950429 | 0.01949385 | 0.20239376 |
| BBOX1      | 1.68468181 | 1.07306883 | 0.01952841 | 0.20246898 |
| CAMLG      | 495.951153 | 0.43599267 | 0.01952707 | 0.20246898 |
| SCAF1      | 888.378566 | -0.3368728 | 0.01954768 | 0.20254795 |
| C21orf88   | 4.72866787 | -1.107982  | 0.01957095 | 0.2026683  |
| UQCRC1     | 1286.21517 | -0.6211502 | 0.01959065 | 0.2027516  |
| ROR1       | 384.425255 | 1.01696193 | 0.01964346 | 0.20305641 |
| SCUBE3     | 728.573639 | -0.8218843 | 0.01963711 | 0.20305641 |
| FAF1       | 562.543406 | 0.29782297 | 0.0196801  | 0.20331423 |
| GLYR1      | 1419.53814 | -0.2955588 | 0.01970676 | 0.203348   |
| SIGLEC11   | 60.4539464 | 1.02248131 | 0.0196975  | 0.203348   |
| ARPP21     | 2.22810699 | -1.0908135 | 0.01983157 | 0.20336723 |
| ATP13A1    | 885.805704 | -0.3465892 | 0.0198353  | 0.20336723 |
| EMC6       | 123.248514 | -0.5765723 | 0.01984863 | 0.20336723 |
| FIGNL2     | 9.34717859 | 1.06954148 | 0.01977984 | 0.20336723 |
| GAPT       | 79.9413979 | 0.98527206 | 0.01972199 | 0.20336723 |
| HIST1H3G   | 73.0565818 | -0.9043276 | 0.01986067 | 0.20336723 |
| HUNK       | 35.8323698 | -0.8701762 | 0.01984215 | 0.20336723 |
| LMCD1-AS1  | 13.948951  | 1.05220182 | 0.01978264 | 0.20336723 |
| LRRC4B     | 130.244496 | -1.0885588 | 0.01985729 | 0.20336723 |
| PLEK       | 244.813059 | 0.78794883 | 0.01980845 | 0.20336723 |
| RSF1       | 1486.43638 | -0.3299063 | 0.01982598 | 0.20336723 |

|            |            |            |            |            |
|------------|------------|------------|------------|------------|
| TLX1       | 12.689766  | 0.99405157 | 0.01984443 | 0.20336723 |
| TMEM65     | 372.74902  | 0.62119155 | 0.01973322 | 0.20336723 |
| NCKIPSD    | 599.9651   | -0.5109912 | 0.01988872 | 0.2035345  |
| BID        | 120.978359 | 0.41620386 | 0.01990463 | 0.20357755 |
| DLGAP5     | 24.0083964 | -0.9530211 | 0.01991693 | 0.20358357 |
| SLC24A4    | 24.7506912 | 0.95831546 | 0.02003246 | 0.2046442  |
| CCL2       | 61.4177212 | 0.86899819 | 0.02009888 | 0.20520211 |
| CKS1B      | 81.9887304 | -0.5498094 | 0.02019444 | 0.20605677 |
| C7orf55    | 47.9986345 | 0.56512067 | 0.02028478 | 0.20685713 |
| CBR3-AS1   | 13.50144   | 0.7090397  | 0.02029762 | 0.20686681 |
| ATAD2      | 505.639468 | -0.6312285 | 0.02032167 | 0.20699054 |
| ASPG       | 7.99686321 | 1.01819742 | 0.02035402 | 0.20707745 |
| MCM6       | 382.547095 | -0.4646323 | 0.02034815 | 0.20707745 |
| GPR126     | 308.139693 | 0.90038941 | 0.02038433 | 0.20726451 |
| AGPAT9     | 67.5119367 | 0.87640276 | 0.02040135 | 0.20731636 |
| PTPMT1     | 357.471986 | -0.2819249 | 0.02042769 | 0.2074628  |
| ERMARD     | 251.673881 | 0.44907719 | 0.02045544 | 0.20746534 |
| ITGB3      | 133.230491 | 0.85949379 | 0.02045048 | 0.20746534 |
| PCDHGA8    | 453.042476 | -0.7087617 | 0.02046648 | 0.20746534 |
| SNTG1      | 11.1011777 | -1.0247754 | 0.02047567 | 0.20746534 |
| DDX50      | 531.331121 | 0.44471711 | 0.02053826 | 0.20768997 |
| FAM168B    | 2427.861   | -0.2742553 | 0.02054562 | 0.20768997 |
| MTR        | 2202.69586 | -0.3247952 | 0.02052724 | 0.20768997 |
| PIK3CD     | 231.695171 | 0.79294009 | 0.02051486 | 0.20768997 |
| RHOT2      | 731.295603 | -0.3839604 | 0.02057668 | 0.20776238 |
| SCAND1     | 260.729242 | -0.4929399 | 0.02057503 | 0.20776238 |
| BAZ2A      | 2621.33734 | -0.4376202 | 0.02067766 | 0.20795268 |
| CLCN4      | 348.277016 | -0.6677132 | 0.02061223 | 0.20795268 |
| COL5A3     | 360.6863   | 0.84947071 | 0.02064515 | 0.20795268 |
| DPYD       | 729.645364 | 0.72850242 | 0.02067925 | 0.20795268 |
| OMG        | 3.30517885 | -1.0887    | 0.02063774 | 0.20795268 |
| SHMT2      | 971.350834 | -0.5594682 | 0.02063303 | 0.20795268 |
| SYF2       | 387.446518 | 0.5030314  | 0.0206562  | 0.20795268 |
| FGD3       | 122.305496 | 0.84202053 | 0.02076778 | 0.20872218 |
| DPY19L2P1  | 3.07955221 | -1.0919747 | 0.02081742 | 0.20910026 |
| PELI2      | 142.112994 | 0.74127422 | 0.02083484 | 0.20915438 |
| NDUFS8     | 734.348193 | -0.5035675 | 0.02085035 | 0.20918933 |
| C19orf68   | 48.6472269 | -0.5621976 | 0.02095091 | 0.20999151 |
| CAPN1      | 1566.37691 | -0.4027477 | 0.02096654 | 0.20999151 |
| LINC00260  | 67.0448266 | -0.5808949 | 0.02096484 | 0.20999151 |
| LOC283335  | 125.136252 | -0.5119278 | 0.0210373  | 0.21055132 |
| THAP8      | 38.6487974 | -0.6020883 | 0.02104666 | 0.21055132 |
| SLC25A25   | 483.81566  | 0.75424476 | 0.02107039 | 0.21066754 |
| SCAP       | 1467.98571 | -0.3708484 | 0.02109398 | 0.21078217 |
| SAP130     | 469.096323 | -0.3758627 | 0.02111395 | 0.21086052 |
| SAMD9L     | 1618.07619 | 0.40169307 | 0.02112641 | 0.21086387 |
| LOC1019272 | 40.3230912 | 0.58866208 | 0.02114418 | 0.21092018 |
| ZFPL1      | 261.263955 | -0.3345085 | 0.02116482 | 0.21100504 |
| CYB5RL     | 80.1570353 | 0.48662857 | 0.02120471 | 0.21102958 |
| HCG11      | 396.977876 | 0.85444441 | 0.02121583 | 0.21102958 |

|          |            |            |            |            |
|----------|------------|------------|------------|------------|
| MRPS5    | 441.433288 | -0.3650312 | 0.02119338 | 0.21102958 |
| SKINTL   | 9.63701817 | 0.96943952 | 0.02119264 | 0.21102958 |
| C12orf61 | 10.607419  | -0.7686292 | 0.02131109 | 0.21185587 |
| ASPHD1   | 2.79159796 | -1.0921215 | 0.02136907 | 0.21231083 |
| GNB4     | 1378.75206 | 0.74032026 | 0.02139059 | 0.21240335 |
| SCP2     | 1172.02763 | 0.43404301 | 0.02141268 | 0.21250129 |
| ABCC4    | 969.669624 | -1.0051327 | 0.02142658 | 0.21251798 |
| PRLR     | 46.0667755 | 0.95407071 | 0.02144086 | 0.21253831 |
| NAA60    | 679.787761 | -0.4079099 | 0.02146001 | 0.21260699 |
| KLHL8    | 341.765666 | 0.34943375 | 0.02150445 | 0.21292586 |
| DCT      | 9.20397316 | 0.88646962 | 0.0215407  | 0.21292612 |
| NSUN5P1  | 329.433093 | 0.66335717 | 0.02152891 | 0.21292612 |
| TMCC3    | 614.216183 | 0.64258343 | 0.02154121 | 0.21292612 |
| LACTB    | 239.709333 | 0.57604961 | 0.021613   | 0.21351436 |
| CXCR2    | 17.8931913 | 0.81784564 | 0.02162606 | 0.21352201 |
| ARL16    | 247.621612 | -0.3969941 | 0.02166547 | 0.21378977 |
| S1PR4    | 5.21458868 | 1.03209087 | 0.02171602 | 0.21416698 |
| NCAPD2   | 655.945655 | -0.2937795 | 0.02173395 | 0.21422229 |
| RAB6C    | 8.29464806 | -0.9161483 | 0.02176147 | 0.21437203 |
| ELF4     | 571.687794 | -0.4650494 | 0.02177497 | 0.2143836  |
| C12orf29 | 148.240804 | 0.35647449 | 0.02186062 | 0.21452397 |
| GM2A     | 1117.26506 | 0.35651929 | 0.02182236 | 0.21452397 |
| HMGCS1   | 911.652454 | -0.7171924 | 0.02186289 | 0.21452397 |
| IDH3A    | 801.884116 | -0.6547476 | 0.02189548 | 0.21452397 |
| MYO3A    | 106.623365 | -1.077086  | 0.02180205 | 0.21452397 |
| PSMD10   | 365.616454 | 0.30677418 | 0.02186603 | 0.21452397 |
| SECTM1   | 49.067733  | 0.85253711 | 0.02189186 | 0.21452397 |
| STMN2    | 2.39704459 | -1.0742643 | 0.02188136 | 0.21452397 |
| ZNF22    | 249.891944 | 0.56915901 | 0.02190027 | 0.21452397 |
| MB21D2   | 73.0048467 | 0.80856601 | 0.02193474 | 0.2147406  |
| ABC4     | 37.1981269 | 0.79368286 | 0.02196255 | 0.21489184 |
| ACAP1    | 28.5664862 | 0.86034876 | 0.02199375 | 0.2149552  |
| FOXD2    | 942.465971 | -0.6287259 | 0.02199211 | 0.2149552  |
| AKAP3    | 11.2480988 | 0.91690054 | 0.02203102 | 0.21496607 |
| CAPN15   | 493.434178 | -0.5240137 | 0.02203372 | 0.21496607 |
| CNIH3    | 23.5528585 | 0.86501915 | 0.02205138 | 0.21496607 |
| PLEKHF2  | 193.468751 | 0.35078398 | 0.02205316 | 0.21496607 |
| SEL1L3   | 485.227304 | -0.7609562 | 0.02205668 | 0.21496607 |
| FAM127C  | 206.909285 | -0.5002763 | 0.02211144 | 0.2150177  |
| IPO7     | 3149.28198 | -0.3251077 | 0.02209604 | 0.2150177  |
| 8-Mar    | 681.023024 | 0.39575728 | 0.02210053 | 0.2150177  |
| SNORA52  | 23.0559988 | 0.80566754 | 0.02208905 | 0.2150177  |
| ANKRD13C | 565.789963 | 0.44004773 | 0.02219015 | 0.21557485 |
| ERBB2IP  | 3374.26577 | 0.27756064 | 0.02219353 | 0.21557485 |
| TNNT2    | 1475.20501 | -0.9325079 | 0.02221806 | 0.2156026  |
| ZNHIT6   | 311.704594 | 0.37093872 | 0.02222119 | 0.2156026  |
| NSUN7    | 76.2870332 | -0.7089598 | 0.0222589  | 0.21575755 |
| TCTN3    | 829.238342 | 0.37830277 | 0.02226198 | 0.21575755 |
| CD52     | 13.6399702 | 0.87895603 | 0.02234388 | 0.21627593 |
| HERC4    | 963.61392  | 0.29143824 | 0.02238071 | 0.21627593 |

|            |            |            |            |            |
|------------|------------|------------|------------|------------|
| HHIPL1     | 88.0496148 | 0.7851386  | 0.0223901  | 0.21627593 |
| JUP        | 2473.55204 | -0.5995679 | 0.02235301 | 0.21627593 |
| SLC30A3    | 22.6380149 | 1.082923   | 0.02234443 | 0.21627593 |
| TRABD2A    | 14.7184264 | -0.9514251 | 0.02238316 | 0.21627593 |
| CEP41      | 178.313391 | 0.46650335 | 0.02242751 | 0.21639681 |
| TANGO6     | 355.619864 | 0.45995293 | 0.02241776 | 0.21639681 |
| C16orf93   | 27.1076684 | -0.5959893 | 0.02248243 | 0.2164463  |
| KIAA0895L  | 428.970034 | -0.5863698 | 0.02247273 | 0.2164463  |
| POTEJ      | 28.3274686 | -0.7833509 | 0.02246992 | 0.2164463  |
| ULK1       | 895.465734 | -0.5465802 | 0.02247607 | 0.2164463  |
| FGD1       | 315.451466 | -0.3506129 | 0.02250534 | 0.21654697 |
| LOC220729  | 420.605955 | -0.4642984 | 0.02253884 | 0.21662953 |
| POLDIP2    | 1095.68949 | -0.3822202 | 0.02253702 | 0.21662953 |
| HSBP1L1    | 91.9221083 | -0.5251779 | 0.02259062 | 0.21688741 |
| SEMA3E     | 4.38552869 | 0.99599892 | 0.02258093 | 0.21688741 |
| PDF        | 16.4606665 | -0.7497043 | 0.02266379 | 0.2174698  |
| LRRC40     | 199.181019 | 0.42229174 | 0.02268386 | 0.21754237 |
| BTN3A1     | 391.206293 | 0.56953387 | 0.02277199 | 0.21778688 |
| CPO        | 10.4482068 | 0.84403212 | 0.02274252 | 0.21778688 |
| HTRA1      | 1536.66315 | 0.74335913 | 0.02275144 | 0.21778688 |
| 1-Mar      | 379.859474 | 0.79825416 | 0.02276107 | 0.21778688 |
| RPS23      | 6613.63454 | 0.45185596 | 0.02272692 | 0.21778688 |
| RSRP1      | 765.066818 | 0.50532918 | 0.02280135 | 0.21782805 |
| WHAMMP3    | 138.607852 | 0.52783199 | 0.02278934 | 0.21782805 |
| CEP135     | 226.552622 | 0.45224283 | 0.0229153  | 0.21859047 |
| KMT2D      | 4100.80275 | -0.4158093 | 0.02291887 | 0.21859047 |
| SLC25A13   | 347.854663 | 0.40886223 | 0.02291568 | 0.21859047 |
| MX1        | 1088.20851 | 0.51438313 | 0.02294095 | 0.21867294 |
| TOB1       | 2268.61505 | -0.6877087 | 0.02295267 | 0.21867294 |
| LOC1019272 | 2.87444917 | 1.06242824 | 0.02297759 | 0.21879044 |
| OGDHL      | 549.683424 | -1.0153491 | 0.02300299 | 0.2189124  |
| SNX9       | 1092.41067 | 0.40987145 | 0.02304448 | 0.2191873  |
| TSTA3      | 307.565367 | -0.6122919 | 0.02307823 | 0.21938831 |
| ITGAM      | 683.923182 | 0.86078714 | 0.02311663 | 0.21963325 |
| ANKRD39    | 70.7748302 | -0.4513276 | 0.02316986 | 0.21978369 |
| FAAH       | 146.221423 | -0.8561108 | 0.02318073 | 0.21978369 |
| NRG4       | 38.7973849 | -1.0654855 | 0.02319255 | 0.21978369 |
| RPUSD3     | 137.418033 | -0.365119  | 0.02317888 | 0.21978369 |
| SNHG10     | 69.0186401 | 0.54481739 | 0.02319567 | 0.21978369 |
| ACTN4      | 4774.61394 | -0.3803664 | 0.02322562 | 0.21980358 |
| CHST11     | 663.672446 | 0.67747885 | 0.02322473 | 0.21980358 |
| HNRNPLL    | 576.215159 | 0.38243633 | 0.02329873 | 0.21980358 |
| NME4       | 800.256034 | -0.5490517 | 0.0232989  | 0.21980358 |
| RPS19      | 3971.51888 | 0.36284608 | 0.02323645 | 0.21980358 |
| SNX29      | 1299.29766 | 0.5117252  | 0.02329825 | 0.21980358 |
| TMEM260    | 430.044493 | 0.48357613 | 0.02328556 | 0.21980358 |
| TTYH1      | 7.1437205  | -1.0795841 | 0.02327117 | 0.21980358 |
| ITGA3      | 768.657328 | -0.7316395 | 0.02332039 | 0.21988702 |
| GFI1       | 7.84912419 | 0.90554414 | 0.02335019 | 0.22004862 |
| CLK2       | 655.148327 | -0.3422149 | 0.0234194  | 0.2205813  |

|            |            |            |            |            |
|------------|------------|------------|------------|------------|
| LOC728819  | 4.00477243 | -1.0729496 | 0.02346078 | 0.22085138 |
| C7orf76    | 3.06143702 | 1.04768068 | 0.02350998 | 0.22119481 |
| ZFHX4      | 1144.16192 | -0.7384786 | 0.02352682 | 0.22123352 |
| LINC00632  | 2.24320119 | -1.0421596 | 0.02354306 | 0.22126656 |
| KLC2       | 379.75976  | -0.4972352 | 0.02360938 | 0.22145809 |
| LOC1005070 | 19.7006025 | 0.79203955 | 0.02358671 | 0.22145809 |
| MAP4K1     | 46.6511979 | 0.71486945 | 0.02362091 | 0.22145809 |
| TPX2       | 243.274106 | -0.8622154 | 0.02359646 | 0.22145809 |
| ZNF699     | 99.6650107 | 0.52957391 | 0.02362712 | 0.22145809 |
| GUSBP3     | 31.1473823 | 0.6918888  | 0.02365509 | 0.22160081 |
| ADAMTS4    | 121.0676   | 1.00606538 | 0.02366811 | 0.22160331 |
| NCAPH2     | 281.76428  | 0.33632678 | 0.02368737 | 0.22166435 |
| CUX1       | 3187.06854 | -0.4641897 | 0.0237041  | 0.22170154 |
| MIR155HG   | 24.0683038 | 0.96302953 | 0.02375797 | 0.22184742 |
| NBAS       | 1832.27167 | 0.27532798 | 0.02375185 | 0.22184742 |
| SPRY1      | 725.704707 | 0.81108963 | 0.02373873 | 0.22184742 |
| FGD2       | 347.152224 | 0.81760202 | 0.02380393 | 0.22211994 |
| MICU3      | 166.352668 | 0.50395795 | 0.02381271 | 0.22211994 |
| GORASP2    | 1000.53062 | -0.3448157 | 0.02396279 | 0.22340002 |
| NHLRC4     | 22.9725902 | 0.8507309  | 0.0239999  | 0.22362605 |
| CCL19      | 2.73843641 | 1.07384808 | 0.02401449 | 0.22364215 |
| CCDC178    | 6.10404208 | -1.0734467 | 0.02406278 | 0.22376212 |
| GOT2       | 958.047822 | -0.4282375 | 0.02406067 | 0.22376212 |
| TMEM151B   | 10.8733918 | -1.0411875 | 0.02406598 | 0.22376212 |
| CHCHD6     | 145.135902 | 0.8418858  | 0.02412437 | 0.22418514 |
| SLC47A1    | 18087.3545 | -0.765393  | 0.02414973 | 0.22430094 |
| EAF2       | 52.3195924 | 0.61812557 | 0.02421297 | 0.22476828 |
| CXCL16     | 618.1594   | 0.59633366 | 0.02426519 | 0.22479214 |
| FZD2       | 922.284736 | -0.5313459 | 0.02426961 | 0.22479214 |
| ICK        | 698.567284 | 0.54131913 | 0.02428019 | 0.22479214 |
| TNFSF13B   | 90.3036759 | 0.67587961 | 0.02423749 | 0.22479214 |
| ZFP36L2    | 3711.77489 | -0.5278764 | 0.02424291 | 0.22479214 |
| GPR133     | 727.241265 | 1.00178976 | 0.0242962  | 0.22482069 |
| CEP120     | 1316.42276 | 0.43608802 | 0.02438171 | 0.22525231 |
| GAS2L2     | 3.97672747 | 1.04930584 | 0.02437693 | 0.22525231 |
| TSPAN7     | 1093.2896  | 1.00298209 | 0.02436466 | 0.22525231 |
| COMMD3     | 144.607933 | 0.47082503 | 0.02440063 | 0.22530737 |
| C15orf56   | 5.02940631 | -0.8947364 | 0.02441758 | 0.22534419 |
| CLEC17A    | 13.3043742 | 1.04030977 | 0.0245615  | 0.22602899 |
| ECT2L      | 5.15152394 | 0.91239442 | 0.02456782 | 0.22602899 |
| KLK14      | 1.48870345 | -1.054773  | 0.02456978 | 0.22602899 |
| LRRC8C     | 1350.67903 | 0.56654901 | 0.02453134 | 0.22602899 |
| 5-Sep      | 7.00289732 | -0.8140521 | 0.02455168 | 0.22602899 |
| SH2B2      | 12.0060691 | -0.8624739 | 0.02456924 | 0.22602899 |
| CHAMP1     | 302.351162 | -0.501813  | 0.02458733 | 0.22607079 |
| HNRNPD     | 1198.63101 | -0.5032638 | 0.02460929 | 0.22615317 |
| C21orf128  | 2.04934458 | -0.987804  | 0.02467428 | 0.22651097 |
| ZNF683     | 2.64533359 | 1.05764801 | 0.02466782 | 0.22651097 |
| TM6SF2     | 27.8290442 | -0.8036723 | 0.02472036 | 0.22681417 |
| AOAH-IT1   | 3.97782033 | 1.06798343 | 0.02478354 | 0.22708669 |

|            |            |            |            |            |
|------------|------------|------------|------------|------------|
| ARPC5L     | 169.938089 | -0.3817064 | 0.02480281 | 0.22708669 |
| FAM209B    | 1.83019968 | 1.02331912 | 0.0247986  | 0.22708669 |
| INHBA      | 35.4329491 | 0.95308813 | 0.02477483 | 0.22708669 |
| LOC1005060 | 13.2443838 | 0.92419905 | 0.02481536 | 0.22708669 |
| AMH        | 71.3763542 | -1.0425391 | 0.02489788 | 0.227722   |
| FZD8       | 192.692848 | 0.72706782 | 0.02492896 | 0.22788633 |
| MTMR4      | 1504.43764 | -0.3746614 | 0.02505049 | 0.22839687 |
| SLC25A44   | 488.020317 | -0.4017687 | 0.02502591 | 0.22839687 |
| STAT5A     | 513.060626 | 0.42143253 | 0.02502689 | 0.22839687 |
| TTLL13     | 2.77602982 | 0.95485214 | 0.02499833 | 0.22839687 |
| ZNF574     | 267.234425 | -0.3298897 | 0.02504835 | 0.22839687 |
| CMAHP      | 245.634786 | 0.8110777  | 0.02513503 | 0.22880776 |
| HEXB       | 1339.26651 | 0.45052303 | 0.02512886 | 0.22880776 |
| ZNF587     | 1604.24219 | -0.3908286 | 0.02512937 | 0.22880776 |
| MAPK7      | 340.761987 | -0.396828  | 0.02514971 | 0.22882158 |
| SNORA47    | 139.93796  | -0.7345851 | 0.02519316 | 0.229097   |
| GALNT6     | 33.8115769 | 0.72726315 | 0.02523491 | 0.22923689 |
| STS        | 544.439592 | 0.86039644 | 0.02522246 | 0.22923689 |
| FRA10AC1   | 203.864359 | 0.54622705 | 0.02525419 | 0.22929063 |
| SLC6A17    | 35.9318781 | 1.05185537 | 0.0252672  | 0.22929063 |
| GFAP       | 463.348055 | -0.9769606 | 0.0253298  | 0.22961114 |
| IL7R       | 50.5738433 | 0.91289791 | 0.02532611 | 0.22961114 |
| KIAA1328   | 314.680197 | 0.50019435 | 0.02534214 | 0.22961114 |
| CDK10      | 330.42023  | -0.3596547 | 0.02545491 | 0.23051277 |
| SNTB2      | 1670.47162 | 0.59458364 | 0.02550029 | 0.2308035  |
| SLC29A4    | 40.2400635 | -1.017314  | 0.02553219 | 0.230972   |
| ASH1L-AS1  | 55.4314656 | -0.5060008 | 0.02554889 | 0.23100291 |
| APOL3      | 185.002227 | 0.69841869 | 0.02559005 | 0.23125478 |
| LOC1019271 | 2.4332027  | 1.06108091 | 0.0256382  | 0.23132922 |
| MIA3       | 1947.25171 | -0.2723124 | 0.02563525 | 0.23132922 |
| PYGL       | 706.36427  | 0.5826898  | 0.02561255 | 0.23132922 |
| FCGR2A     | 1159.28735 | 0.64252388 | 0.02566012 | 0.23140692 |
| GZMM       | 2.211031   | 1.05998369 | 0.02568412 | 0.23150323 |
| LOC1019297 | 12.4007671 | 1.06113374 | 0.02569971 | 0.23152377 |
| LPCAT2     | 528.828608 | 0.83619309 | 0.02572553 | 0.23163635 |
| GALNT4     | 14.4813983 | 0.75017334 | 0.02575486 | 0.2317804  |
| LRRC66     | 15.1803837 | 0.88528067 | 0.02583438 | 0.23237578 |
| CA8        | 110.526211 | -1.0294945 | 0.02585702 | 0.23239019 |
| NOL12      | 161.06156  | 0.43037076 | 0.02586271 | 0.23239019 |
| INSRR      | 15.9576085 | -0.9918663 | 0.02587969 | 0.23242258 |
| POLR3K     | 81.0842043 | -0.505911  | 0.02595817 | 0.23300704 |
| PDHX       | 639.379876 | -0.3605973 | 0.02600117 | 0.23315233 |
| TRIM47     | 144.958676 | -0.6898732 | 0.02598972 | 0.23315233 |
| C5orf27    | 1.89735155 | 1.03890282 | 0.02603021 | 0.23320499 |
| GZMK       | 15.5997253 | 0.99388617 | 0.02603875 | 0.23320499 |
| SNAP25     | 17.255428  | -1.0576736 | 0.02604728 | 0.23320499 |
| TNFRSF1B   | 755.703004 | 0.70192278 | 0.0260612  | 0.23320947 |
| GMFG       | 86.4196396 | 0.71543611 | 0.0260753  | 0.23321569 |
| CCR1       | 197.787665 | 0.83359577 | 0.02610804 | 0.23338842 |
| ADAT2      | 111.203347 | 0.60640682 | 0.02616298 | 0.23339956 |

|            |            |            |            |            |
|------------|------------|------------|------------|------------|
| MTRNR2L2   | 4241.1046  | -0.7260674 | 0.02615022 | 0.23339956 |
| PLEKHO1    | 363.881833 | 0.56444004 | 0.02613101 | 0.23339956 |
| UBQLN1     | 2000.31087 | -0.375093  | 0.02615229 | 0.23339956 |
| CCR4       | 4.01110993 | 1.0524117  | 0.02618238 | 0.23345282 |
| CELF5      | 3.75096798 | -1.0083411 | 0.02623164 | 0.23354527 |
| FARSB      | 458.348173 | -0.3600004 | 0.02620796 | 0.23354527 |
| SOX11      | 265.871433 | -1.034849  | 0.02623304 | 0.23354527 |
| IMMP2L     | 95.8151445 | 0.5007294  | 0.0262615  | 0.23367899 |
| LOC1019272 | 12.3568726 | 0.98038527 | 0.02628788 | 0.23379406 |
| C11orf21   | 13.7672304 | 1.00355534 | 0.02642508 | 0.23477404 |
| DOCK11     | 482.877773 | 0.53957063 | 0.02641911 | 0.23477404 |
| LOC1019271 | 2.93275656 | 1.05307382 | 0.02648339 | 0.23517197 |
| ZIC1       | 3537.61055 | -0.9088952 | 0.02656076 | 0.23573859 |
| CXorf21    | 37.1817928 | 0.94684863 | 0.02658733 | 0.23579899 |
| SMU1       | 1318.37444 | 0.16131158 | 0.02659469 | 0.23579899 |
| CALY       | 7.3030528  | -1.0479285 | 0.0267759  | 0.23621475 |
| CDKL4      | 5.55580025 | 0.91374789 | 0.02681819 | 0.23621475 |
| CRYM       | 12.7679414 | -1.0535627 | 0.0267356  | 0.23621475 |
| CTSS       | 1017.31921 | 0.65938736 | 0.02670216 | 0.23621475 |
| HIF3A      | 1349.91939 | -0.8805369 | 0.026766   | 0.23621475 |
| NDNF       | 1552.03356 | -1.0169922 | 0.026797   | 0.23621475 |
| NFKB2      | 285.747939 | 0.44182201 | 0.02679863 | 0.23621475 |
| PCDHGA1    | 140.860376 | -0.87027   | 0.02681438 | 0.23621475 |
| PCSK9      | 25.9853045 | -1.0478789 | 0.02679507 | 0.23621475 |
| PLA1A      | 6.88930622 | 0.94286523 | 0.026692   | 0.23621475 |
| SIN3A      | 1649.3924  | -0.3703822 | 0.02668016 | 0.23621475 |
| SMAD5      | 2423.18462 | 0.38990122 | 0.02674339 | 0.23621475 |
| ZNF8       | 357.246858 | -0.3292774 | 0.0267363  | 0.23621475 |
| TLX1NB     | 1.6017985  | 0.91137272 | 0.02689014 | 0.23672852 |
| SLC22A2    | 15.4594627 | 1.05248051 | 0.02690795 | 0.23676548 |
| DLGAP1-AS2 | 13.9576287 | 0.64018166 | 0.02692939 | 0.23683424 |
| FUT7       | 4.42490503 | 0.98288143 | 0.0269534  | 0.23692561 |
| ARMC2      | 120.714659 | 0.6113575  | 0.0269904  | 0.23696541 |
| NUMBL      | 783.050564 | -0.4167651 | 0.02699288 | 0.23696541 |
| SCYL1      | 1084.51047 | -0.2939607 | 0.02699882 | 0.23696541 |
| HOGA1      | 133.47213  | 0.82053366 | 0.027054   | 0.23713153 |
| LDLRAD2    | 12.57815   | 1.04200095 | 0.02705866 | 0.23713153 |
| WEE2-AS1   | 15.8343188 | 0.73394923 | 0.02705513 | 0.23713153 |
| MCM7       | 724.184681 | -0.4355571 | 0.02707725 | 0.23713982 |
| OR2D2      | 4.07557367 | -1.0354666 | 0.02708689 | 0.23713982 |
| ARHGEF26-A | 1.58492064 | 1.05127697 | 0.02713192 | 0.23728674 |
| LOC283194  | 9.6005265  | 0.96197045 | 0.02712955 | 0.23728674 |
| ZCCHC24    | 2831.57915 | 0.33407174 | 0.02714461 | 0.23728674 |
| PPTC7      | 360.357962 | -0.4885756 | 0.02718576 | 0.23752702 |
| EIF4H      | 2666.67296 | 0.2586488  | 0.02721001 | 0.23755311 |
| PSENN      | 217.50706  | 0.3905194  | 0.02722973 | 0.23755311 |
| TTC22      | 1.47608749 | -1.050152  | 0.02722827 | 0.23755311 |
| MROH9      | 2.82990702 | 1.03815968 | 0.02724998 | 0.23761053 |
| C10orf128  | 29.0221794 | 0.73816619 | 0.02728245 | 0.23762702 |
| LOC1027248 | 302.46769  | 0.63350933 | 0.02729287 | 0.23762702 |



|            |            |            |            |            |
|------------|------------|------------|------------|------------|
| PCDHB17    | 44.2809041 | -0.9241422 | 0.02728794 | 0.23762702 |
| RHBDL3     | 88.1858549 | -0.8601094 | 0.02731369 | 0.23768928 |
| ZNF799     | 94.9182206 | 0.50034934 | 0.02732853 | 0.2376994  |
| YIPF1      | 209.253192 | 0.45781954 | 0.02735027 | 0.2377696  |
| C3orf70    | 257.453749 | 0.72783225 | 0.02737808 | 0.2378924  |
| CYP2W1     | 10.4778669 | -1.0079018 | 0.02743358 | 0.23799378 |
| TTYH3      | 995.015923 | -0.5938502 | 0.02740562 | 0.23799378 |
| ZCCHC4     | 144.524958 | 0.4210944  | 0.0274445  | 0.23799378 |
| ZNF384     | 812.383789 | -0.3792345 | 0.0274283  | 0.23799378 |
| CTAGE8     | 11.8415379 | -0.8454339 | 0.02750684 | 0.23829669 |
| SYNJ1      | 1063.77201 | -0.4568981 | 0.02749751 | 0.23829669 |
| MNT        | 460.607299 | -0.4311802 | 0.02755498 | 0.2385948  |
| MSR1       | 1122.472   | 0.76517209 | 0.02764574 | 0.23908202 |
| NFIA       | 4695.35083 | 0.50357291 | 0.02765045 | 0.23908202 |
| ZNF263     | 458.631253 | 0.24289028 | 0.0276525  | 0.23908202 |
| TRMT2A     | 269.082734 | 0.32450134 | 0.02768218 | 0.23921969 |
| LOC440311  | 1.58760966 | -1.0302663 | 0.02771039 | 0.23927697 |
| PIANP      | 20.1547217 | -1.0366883 | 0.02771633 | 0.23927697 |
| CADM2      | 8.84553976 | -1.0244218 | 0.02776167 | 0.23943063 |
| FBXO4      | 139.410242 | 0.41349648 | 0.02775451 | 0.23943063 |
| KLRB1      | 4.40917614 | 0.97902083 | 0.0277866  | 0.23952686 |
| COL26A1    | 168.995378 | 1.03137249 | 0.0278021  | 0.23954167 |
| TMEM17     | 41.0920674 | 0.56000186 | 0.02783389 | 0.23969684 |
| CIZ1       | 1006.58931 | -0.2951435 | 0.02785692 | 0.23977634 |
| PRPF3      | 893.608182 | -0.4212349 | 0.02789542 | 0.23998893 |
| HNRNPL     | 2039.33172 | -0.1807739 | 0.027964   | 0.24045994 |
| PPP1R7     | 467.31146  | -0.4189074 | 0.02801042 | 0.24074008 |
| ACTR3      | 2073.06319 | 0.22894459 | 0.02827137 | 0.24115809 |
| ALG1L9P    | 28.2355557 | 0.6820289  | 0.02813935 | 0.24115809 |
| COX6A1     | 1301.77256 | -0.4599284 | 0.02822812 | 0.24115809 |
| DLL1       | 99.9794692 | 0.97791376 | 0.02819264 | 0.24115809 |
| ESR2       | 27.4881677 | -0.9707338 | 0.02824681 | 0.24115809 |
| FOXL2      | 1.91061421 | -0.9983792 | 0.02827316 | 0.24115809 |
| GABRB1     | 2.21531293 | -0.9908772 | 0.02827155 | 0.24115809 |
| LOC1005056 | 6.60667641 | -0.8149844 | 0.02827936 | 0.24115809 |
| ROCK1      | 1936.47062 | 0.41264077 | 0.02828098 | 0.24115809 |
| SEPP1      | 3837.36251 | 0.76631073 | 0.02814344 | 0.24115809 |
| SPECC1L    | 347.750616 | 0.41516206 | 0.02808477 | 0.24115809 |
| TMC4       | 110.611116 | 0.93666905 | 0.02827263 | 0.24115809 |
| TUBB1      | 10.0103888 | 0.99654438 | 0.02820181 | 0.24115809 |
| WDPCP      | 145.120243 | 0.43077885 | 0.02820646 | 0.24115809 |
| WFDC10B    | 2.7102209  | 1.02575326 | 0.0281136  | 0.24115809 |
| WFIKN1     | 3.49430515 | -1.0317745 | 0.02809227 | 0.24115809 |
| DAXX       | 2.18132962 | 1.03312409 | 0.02831041 | 0.24117254 |
| FAM188A    | 425.822679 | 0.38147236 | 0.02829749 | 0.24117254 |
| SMC2       | 458.197226 | -0.3790248 | 0.02837149 | 0.24157449 |
| LRRC25     | 154.145267 | 0.74158593 | 0.02838801 | 0.2415968  |
| ABI2       | 1588.09546 | -0.2244299 | 0.02842888 | 0.24182633 |
| ATP5I      | 596.748727 | -0.3759869 | 0.02844572 | 0.24185123 |
| BSDL2      | 98.9082478 | -0.4568161 | 0.02846294 | 0.24187934 |

|            |            |            |            |            |
|------------|------------|------------|------------|------------|
| KLHDC1     | 165.277197 | 0.61448016 | 0.02851091 | 0.24196269 |
| PNKD       | 509.222999 | -0.5047797 | 0.02851449 | 0.24196269 |
| ZNF316     | 610.254601 | -0.4104447 | 0.0285145  | 0.24196269 |
| CTSE       | 1.74359092 | -0.9131511 | 0.02855699 | 0.24207301 |
| DHRS2      | 61.6674676 | -1.0416588 | 0.02856927 | 0.24207301 |
| TMIE       | 3.59024775 | 1.00916909 | 0.02855631 | 0.24207301 |
| COL8A1     | 4766.84407 | 1.03381115 | 0.02859737 | 0.24215972 |
| RECK       | 1388.12718 | -0.5304479 | 0.02863521 | 0.24215972 |
| RPS16      | 3764.08004 | -0.651808  | 0.02862735 | 0.24215972 |
| SON        | 12987.1743 | -0.3197481 | 0.02861298 | 0.24215972 |
| DBI        | 477.384109 | -0.4450336 | 0.0287581  | 0.24233968 |
| DUSP27     | 39.0080029 | 0.89970107 | 0.02874457 | 0.24233968 |
| FAM72B     | 11.7650599 | 0.78445663 | 0.02876799 | 0.24233968 |
| KATNBL1    | 330.67351  | 0.34263206 | 0.02874713 | 0.24233968 |
| LY9        | 3.34822    | 1.0116067  | 0.02870403 | 0.24233968 |
| PPIF       | 501.850804 | -0.6684394 | 0.02870631 | 0.24233968 |
| UBE2S      | 175.049783 | -0.6541533 | 0.02869478 | 0.24233968 |
| UVRAG      | 510.237376 | 0.35761816 | 0.02873016 | 0.24233968 |
| ANXA7      | 1250.97796 | 0.36454752 | 0.02878225 | 0.24234239 |
| SF3A2      | 488.462279 | -0.4132267 | 0.02881175 | 0.24245974 |
| TRIT1      | 176.837889 | 0.53209546 | 0.02882408 | 0.24245974 |
| N4BP3      | 164.795274 | -0.7782043 | 0.02887775 | 0.24279373 |
| RNF38      | 1406.56878 | -0.2226329 | 0.02891506 | 0.24298989 |
| BTBD8      | 25.8296113 | 0.80026617 | 0.02893139 | 0.24300969 |
| PABPC1     | 6572.32782 | -0.4367733 | 0.02903672 | 0.24360824 |
| RAB38      | 19.4078108 | -0.9525181 | 0.02904468 | 0.24360824 |
| UBXN4      | 2386.46795 | -0.2646732 | 0.02902293 | 0.24360824 |
| UBA7       | 751.064416 | 0.60678756 | 0.02911635 | 0.24409156 |
| C1GALT1    | 491.396361 | 0.55677444 | 0.02916964 | 0.24430275 |
| CHMP4C     | 73.2725944 | -1.0358508 | 0.02916002 | 0.24430275 |
| TAF10      | 409.21639  | -0.4687711 | 0.02918503 | 0.24431399 |
| MANEA-AS1  | 37.6129926 | 0.62146432 | 0.02920709 | 0.24438095 |
| YBX3P1     | 5.60707308 | -0.8753374 | 0.02923912 | 0.24453132 |
| LURAP1L    | 158.239325 | -0.9759252 | 0.02937835 | 0.24556629 |
| LZTR1      | 823.072208 | 0.37694541 | 0.02939112 | 0.24556629 |
| C20orf197  | 18.5921855 | 0.86821356 | 0.02944396 | 0.24576946 |
| CLUH       | 788.136164 | -0.4430084 | 0.02945784 | 0.24576946 |
| TNIK       | 243.45394  | 0.91971437 | 0.02944546 | 0.24576946 |
| CARF       | 450.817438 | 0.37394428 | 0.02953852 | 0.24588562 |
| CRLF3      | 233.985765 | 0.47084252 | 0.02956407 | 0.24588562 |
| FADS1      | 1134.11158 | -0.8429896 | 0.02950928 | 0.24588562 |
| MAPKAPK5-A | 142.698748 | 0.36364934 | 0.02957076 | 0.24588562 |
| PGF        | 993.816492 | -0.9426984 | 0.02956328 | 0.24588562 |
| 2-Sep      | 6866.83478 | -0.2768692 | 0.02956863 | 0.24588562 |
| WNT9A      | 103.000363 | -0.5986895 | 0.02951711 | 0.24588562 |
| BHMT       | 23.6309174 | 0.98048819 | 0.02964521 | 0.24610089 |
| CCL22      | 4.28369254 | 1.00005721 | 0.02965984 | 0.24610089 |
| FOPNL      | 391.817337 | 0.34416315 | 0.02965182 | 0.24610089 |
| LINC00417  | 21.8407874 | 0.91120929 | 0.02966742 | 0.24610089 |
| MFNG       | 128.447871 | 0.67411958 | 0.02966305 | 0.24610089 |

|            |            |            |            |            |
|------------|------------|------------|------------|------------|
| SLC22A4    | 41.4563244 | 0.66172526 | 0.02970503 | 0.24629535 |
| PCSK2      | 12.6119309 | -1.0252625 | 0.02972395 | 0.24633477 |
| EPHA6      | 7.43172728 | -1.0312239 | 0.02973935 | 0.24634499 |
| CYP2D7P    | 21.1510444 | 0.60225551 | 0.02977938 | 0.24655908 |
| NAALADL2   | 150.442286 | 0.63472871 | 0.0298674  | 0.24717013 |
| LOC729080  | 1.82990467 | -1.0051258 | 0.02988915 | 0.24723243 |
| MZF1       | 388.809985 | -0.4162759 | 0.02990872 | 0.24727673 |
| OCIAD2     | 83.8014111 | -0.8405512 | 0.02993647 | 0.2473402  |
| UNC5A      | 3.49804663 | -1.0286366 | 0.02994485 | 0.2473402  |
| ROGDI      | 291.872456 | -0.4610736 | 0.02997633 | 0.24748264 |
| FAM106CP   | 23.2047452 | -1.0324095 | 0.02999199 | 0.24749439 |
| GRM7       | 50.5610799 | -0.9586207 | 0.03002835 | 0.24767691 |
| SMPDL3B    | 15.6079415 | -1.0218329 | 0.03005422 | 0.24777277 |
| IGHMBP2    | 278.573861 | -0.3009374 | 0.03008683 | 0.24792401 |
| SNORA53    | 762.388792 | -0.6696936 | 0.03010378 | 0.24794622 |
| HSPA5      | 7384.48575 | -0.7000995 | 0.03013111 | 0.24805378 |
| PM20D1     | 8.05558329 | 1.02991409 | 0.03019773 | 0.24824957 |
| RPL39      | 1464.92433 | 0.43363649 | 0.03019353 | 0.24824957 |
| YWHAE      | 5386.98731 | -0.3747037 | 0.0301836  | 0.24824957 |
| LPCAT4     | 118.612118 | -0.4651358 | 0.03023203 | 0.24829676 |
| PPP1R1C    | 4.25093995 | -1.0295253 | 0.03022303 | 0.24829676 |
| NT5C2      | 2071.54906 | 0.50139497 | 0.03026479 | 0.24844848 |
| CILP2      | 57.5657309 | 1.02498144 | 0.03032018 | 0.24878577 |
| FLJ37201   | 27.3326022 | 0.77564309 | 0.03034607 | 0.24888073 |
| ANO7       | 33.189716  | -0.765824  | 0.03040081 | 0.24908734 |
| NPW        | 49.094654  | -1.0267467 | 0.03042958 | 0.24908734 |
| PPP1R12B   | 2418.77574 | 0.44332694 | 0.03041518 | 0.24908734 |
| RAD1       | 360.789756 | 0.35699653 | 0.030431   | 0.24908734 |
| TMED1      | 260.162408 | 0.36802719 | 0.03044289 | 0.24908734 |
| LGALS4     | 3.8645593  | -0.9395184 | 0.03048867 | 0.24934453 |
| GABRA2     | 2.58386773 | -0.9898431 | 0.03054013 | 0.24964798 |
| CNOT1      | 4162.53804 | -0.3343013 | 0.03056389 | 0.24968022 |
| GLS        | 2331.75842 | 0.62070117 | 0.0305728  | 0.24968022 |
| PFKFB3     | 1196.27315 | 0.62419674 | 0.03065101 | 0.25018168 |
| POTEF      | 9.77577132 | -0.8079386 | 0.03066298 | 0.25018168 |
| GOLGA8N    | 119.706053 | 0.54571469 | 0.03075154 | 0.25067957 |
| KRTAP5-AS1 | 1.76275552 | -1.0163574 | 0.03076725 | 0.25067957 |
| TAS2R13    | 74.4867692 | 0.6507873  | 0.03075984 | 0.25067957 |
| SEC16A     | 2977.57665 | -0.3194636 | 0.03080685 | 0.25076721 |
| SIRT7      | 117.562439 | -0.4154089 | 0.03080644 | 0.25076721 |
| FAM45B     | 12.1676615 | 0.64797468 | 0.03083902 | 0.25091157 |
| SUPT3H     | 107.072298 | 0.69345907 | 0.03086394 | 0.25091307 |
| ZNF410     | 441.712418 | 0.40915591 | 0.03086807 | 0.25091307 |
| ACTR3C     | 25.830835  | -0.6619959 | 0.03089857 | 0.25104365 |
| NUP210     | 631.301645 | -0.5449269 | 0.0309296  | 0.25117843 |
| DEAF1      | 438.200457 | -0.3292755 | 0.03101467 | 0.25147112 |
| GALNT13    | 14.8042493 | -1.0252868 | 0.03103875 | 0.25147112 |
| GOLM1      | 1684.28937 | -0.4968753 | 0.03106689 | 0.25147112 |
| KIAA0100   | 5238.0351  | -0.2815523 | 0.03101884 | 0.25147112 |
| PLEKHA1    | 1156.35909 | 0.58104557 | 0.03104246 | 0.25147112 |

|            |            |            |            |            |
|------------|------------|------------|------------|------------|
| RAVER1     | 586.469172 | -0.4096233 | 0.03098096 | 0.25147112 |
| SFTPD      | 5.55003428 | 1.02331747 | 0.03106311 | 0.25147112 |
| RAPGEF3    | 967.416952 | -0.5602348 | 0.031104   | 0.25165435 |
| TPRXL      | 6.72877117 | -0.9423401 | 0.03112081 | 0.25167325 |
| CD177      | 8686.63157 | -1.001403  | 0.03117176 | 0.25196807 |
| EIF4EBP3   | 42.8032088 | -0.7631246 | 0.03120873 | 0.25214974 |
| B4GALNT3   | 22.0902395 | 0.80238931 | 0.03124021 | 0.25227048 |
| LAMTOR3    | 577.955848 | 0.29306656 | 0.0312527  | 0.25227048 |
| HNRNPH3    | 1162.12577 | -0.3536107 | 0.03132253 | 0.25259968 |
| IBA57      | 466.399993 | -0.383062  | 0.03132222 | 0.25259968 |
| MSTN       | 20.87648   | 0.7404169  | 0.03141902 | 0.25326035 |
| PDE2A      | 97.9535327 | 0.90196606 | 0.03152195 | 0.25397224 |
| GRIA4      | 2.94025015 | -1.0208396 | 0.03153904 | 0.25399225 |
| KCNJ13     | 59.8457904 | 0.95936417 | 0.03158809 | 0.25403429 |
| LOC1005066 | 5.27257744 | 1.01263623 | 0.03156907 | 0.25403429 |
| TICRR      | 32.5133081 | -0.9092545 | 0.03157459 | 0.25403429 |
| FAM229B    | 283.705755 | 0.60403567 | 0.03168117 | 0.25442977 |
| FAM26E     | 362.506306 | 0.69174444 | 0.03167818 | 0.25442977 |
| TNFRSF10C  | 16.041332  | 0.87283315 | 0.03167245 | 0.25442977 |
| BRIP1      | 97.4356108 | -0.7754927 | 0.03176517 | 0.25469118 |
| CD93       | 1841.3488  | 0.64245529 | 0.0317663  | 0.25469118 |
| HADH       | 363.424091 | -0.3303971 | 0.03177231 | 0.25469118 |
| PIGK       | 523.976558 | 0.41876465 | 0.03175254 | 0.25469118 |
| CDK1       | 83.1077465 | -0.7440842 | 0.03181009 | 0.25487653 |
| STK17A     | 516.192281 | 0.5131071  | 0.03182794 | 0.25490207 |
| KRT14      | 35.2896569 | -0.9290192 | 0.03186176 | 0.2549973  |
| RPF2       | 279.903542 | 0.42586135 | 0.03186916 | 0.2549973  |
| BET1       | 226.599881 | 0.26542838 | 0.03194943 | 0.25515481 |
| CEP85L     | 438.217602 | 0.56305543 | 0.03199157 | 0.25515481 |
| COL6A4P2   | 23.2813084 | 0.97394546 | 0.03198451 | 0.25515481 |
| ESRRA      | 338.095416 | -0.5579757 | 0.03198623 | 0.25515481 |
| RAB8B      | 1442.46223 | 0.57380756 | 0.03192629 | 0.25515481 |
| SGMS1      | 775.989973 | 0.42794088 | 0.03195488 | 0.25515481 |
| TCTEX1D1   | 3.64934807 | 0.95780663 | 0.03191531 | 0.25515481 |
| RIMS2      | 5.81810488 | -1.0014582 | 0.03200849 | 0.25517266 |
| ABO        | 40.4452288 | 1.00444209 | 0.0320307  | 0.25523268 |
| HIST2H2BE  | 754.436763 | -0.6410071 | 0.03205181 | 0.2552839  |
| HIP1       | 862.214974 | 0.59700508 | 0.0321757  | 0.25615338 |
| ABCC13     | 9.3123992  | -0.9622002 | 0.03222055 | 0.25639298 |
| CD302      | 35.5567428 | -0.7578501 | 0.03232882 | 0.25659273 |
| MAP1S      | 402.749446 | -0.3685481 | 0.03228056 | 0.25659273 |
| MFAP5      | 1780.12705 | 1.00243595 | 0.03233133 | 0.25659273 |
| MORN1      | 58.8724376 | 0.66584871 | 0.03229395 | 0.25659273 |
| MTERF      | 192.283013 | 0.34151933 | 0.03233842 | 0.25659273 |
| NBEA       | 1068.86355 | -0.5195477 | 0.03234895 | 0.25659273 |
| ZNF579     | 106.219169 | -0.5102617 | 0.03230863 | 0.25659273 |
| PBDC1      | 204.548602 | -0.4608272 | 0.03243798 | 0.25694719 |
| SNHG21     | 45.569645  | 0.39907104 | 0.03243372 | 0.25694719 |
| ZRANB1     | 1095.67798 | 0.36661588 | 0.03241275 | 0.25694719 |
| SHB        | 737.855232 | -0.6726187 | 0.03247336 | 0.25711036 |

|            |            |            |            |            |
|------------|------------|------------|------------|------------|
| DDX12P     | 104.241495 | -0.645682  | 0.03249043 | 0.25712839 |
| C9orf16    | 317.794992 | -0.4008341 | 0.0325708  | 0.25717916 |
| MYH14      | 712.063452 | -0.8502224 | 0.03254292 | 0.25717916 |
| NTRK1      | 2.89889109 | -0.957311  | 0.0325594  | 0.25717916 |
| QRFPR      | 28.312584  | 1.01017245 | 0.03252975 | 0.25717916 |
| RDX        | 3597.57349 | -0.5245057 | 0.0325464  | 0.25717916 |
| C11orf80   | 88.5485413 | -0.5232623 | 0.03261565 | 0.25734123 |
| SV2B       | 17.1061879 | -0.9925743 | 0.03263175 | 0.25734123 |
| ULBP1      | 4.52073693 | 0.99365837 | 0.03263573 | 0.25734123 |
| POF1B      | 63.2780644 | -0.8952659 | 0.03269798 | 0.25759845 |
| TNFRSF10D  | 240.268672 | 0.93405353 | 0.03269121 | 0.25759845 |
| CAPS2      | 102.19301  | 0.54202835 | 0.0328256  | 0.25813603 |
| LEPR       | 18695.1597 | 0.95409096 | 0.0328087  | 0.25813603 |
| RPA2       | 399.540277 | 0.43748664 | 0.03281131 | 0.25813603 |
| STARD4-AS1 | 23.4696881 | -0.8249105 | 0.03278525 | 0.25813603 |
| UBE2D1     | 185.24464  | 0.37388731 | 0.03289566 | 0.25856999 |
| CACTIN-AS1 | 3.97012487 | 0.99207421 | 0.03291339 | 0.25859098 |
| MIR181A1HG | 53.466918  | -0.6629919 | 0.03292807 | 0.25859098 |
| SNORA28    | 4.21996007 | 0.86458776 | 0.03296239 | 0.2587436  |
| ZFYVE9     | 1147.37377 | 0.50447793 | 0.03299893 | 0.25891351 |
| CLSTN3     | 714.88059  | -0.4444353 | 0.03301878 | 0.25895242 |
| LINC00599  | 1.65128869 | -0.9796687 | 0.0330574  | 0.25913842 |
| ALDOA      | 9587.04594 | -0.5566282 | 0.03313438 | 0.25944429 |
| GPI        | 4045.66818 | -0.5345555 | 0.03313871 | 0.25944429 |
| TGM5       | 2.5881356  | 0.82786529 | 0.03315611 | 0.25944429 |
| ZNF687     | 699.257902 | -0.301315  | 0.03314226 | 0.25944429 |
| ITM2C      | 13461.8973 | -0.8203987 | 0.03318615 | 0.25954011 |
| PRICKLE3   | 78.034731  | -0.4920662 | 0.03319821 | 0.25954011 |
| GPR132     | 92.2024032 | 0.80625709 | 0.03326639 | 0.25957517 |
| GTF2B      | 197.608775 | 0.45775631 | 0.03323382 | 0.25957517 |
| NCOA6      | 1422.81506 | -0.4236846 | 0.03332193 | 0.25957517 |
| PLEKHH3    | 615.502014 | -0.5807605 | 0.03335855 | 0.25957517 |
| PTCHD2     | 5.90659327 | -1.011665  | 0.03325297 | 0.25957517 |
| RUNX1-IT1  | 26.6330095 | 0.81742803 | 0.03334639 | 0.25957517 |
| SCARNA12   | 714.151407 | 0.49946907 | 0.03336691 | 0.25957517 |
| SEC14L1    | 2037.92264 | -0.4408411 | 0.03336308 | 0.25957517 |
| SLC35A3    | 424.410031 | 0.41423025 | 0.03331399 | 0.25957517 |
| UBR2       | 1798.37249 | 0.31756913 | 0.03327663 | 0.25957517 |
| YTHDF1     | 902.74001  | -0.4198816 | 0.03334828 | 0.25957517 |
| DOC2A      | 32.5693249 | -0.8965832 | 0.03339072 | 0.25964422 |
| FLT3       | 6.51196141 | 1.00689467 | 0.03345    | 0.25966781 |
| MIR612     | 2.62414733 | -0.937963  | 0.0334134  | 0.25966781 |
| PDLIM2     | 440.868916 | 0.68969736 | 0.03345635 | 0.25966781 |
| TIMMDC1    | 451.925978 | 0.27875804 | 0.03346843 | 0.25966781 |
| WDR92      | 110.455294 | 0.40440628 | 0.03346487 | 0.25966781 |
| EIF5AL1    | 8.87422587 | -0.8061487 | 0.03349143 | 0.25973034 |
| NPPA-AS1   | 6.18480862 | 0.89286365 | 0.03353727 | 0.25996995 |
| DTHD1      | 4.10677117 | 0.9973754  | 0.03357389 | 0.26002195 |
| ZNF285     | 88.7450096 | 0.47082396 | 0.03357035 | 0.26002195 |
| FAM151B    | 43.7755245 | 0.54721059 | 0.03360574 | 0.26003691 |

|             |            |            |            |            |
|-------------|------------|------------|------------|------------|
| FRG1        | 191.350772 | 0.22386993 | 0.0335967  | 0.26003691 |
| NUDT12      | 365.079779 | 0.60855795 | 0.0336459  | 0.26016499 |
| RBX1        | 228.861031 | 0.4026856  | 0.03365221 | 0.26016499 |
| ALDH3A1     | 4.44993743 | -0.9917011 | 0.03374344 | 0.26024523 |
| ATP7A       | 772.695741 | 0.26486307 | 0.03375043 | 0.26024523 |
| DKFZP586I14 | 268.440952 | 0.55211716 | 0.03378234 | 0.26024523 |
| DYRK4       | 203.449138 | 0.36925473 | 0.03377017 | 0.26024523 |
| HERC2P7     | 46.343404  | -0.5237765 | 0.03369772 | 0.26024523 |
| LOC1001303  | 1.51491822 | 1.00229542 | 0.03375058 | 0.26024523 |
| LRR37A11P   | 13.7574548 | -0.9362379 | 0.03374727 | 0.26024523 |
| TRMU        | 122.978278 | 0.44229808 | 0.03377568 | 0.26024523 |
| TP73        | 9.03126914 | -0.9353175 | 0.03381513 | 0.26038246 |
| SCN4B       | 682.149213 | 0.91624896 | 0.03383874 | 0.26044894 |
| DEPDC1      | 29.3538541 | -0.7522466 | 0.03388682 | 0.26058828 |
| PRKCB       | 168.730706 | 0.70645899 | 0.03387915 | 0.26058828 |
| PRR24       | 106.408013 | -0.3411223 | 0.03395932 | 0.26103038 |
| KPNA2       | 404.120769 | -0.5136959 | 0.03399266 | 0.26117122 |
| YY1AP1      | 928.926095 | -0.2672628 | 0.03406707 | 0.26162727 |
| CCDC175     | 14.9213095 | 0.997589   | 0.03409939 | 0.26173542 |
| SNX30       | 654.993546 | 0.46289364 | 0.03411126 | 0.26173542 |
| STXBP1      | 544.753885 | -0.4085159 | 0.03417583 | 0.26211517 |
| EPB41L1     | 1761.53547 | -0.4547256 | 0.03419405 | 0.26213934 |
| MBD6        | 899.441666 | -0.4306399 | 0.0342595  | 0.26252529 |
| AQP11       | 15.694978  | -0.6946091 | 0.03429455 | 0.2625797  |
| CELF3       | 2.345369   | -1.0066138 | 0.03431993 | 0.2625797  |
| ENDOG       | 90.0832287 | -0.6635248 | 0.03430434 | 0.2625797  |
| PRPS2       | 291.605368 | -0.3044003 | 0.03432782 | 0.2625797  |
| SLC6A16     | 21.836444  | -0.9207346 | 0.03434211 | 0.2625797  |
| CENPP       | 153.120335 | -0.5652788 | 0.03436163 | 0.2626135  |
| EZR         | 3787.78277 | -0.6956582 | 0.03438529 | 0.26267888 |
| GCLM        | 224.552565 | 0.65868474 | 0.03448515 | 0.26332602 |
| ENO1        | 5423.13343 | 0.47077332 | 0.03456116 | 0.2634656  |
| GPR37       | 12.7618819 | -1.0053798 | 0.03451992 | 0.2634656  |
| PFDN4       | 105.280458 | 0.43888168 | 0.03455707 | 0.2634656  |
| RBPMS       | 570.196153 | -0.6158569 | 0.03456404 | 0.2634656  |
| GATAD2A     | 1007.69208 | -0.4070371 | 0.03459536 | 0.26358873 |
| KIN         | 283.250612 | 0.31670163 | 0.03462356 | 0.26368804 |
| ARHGEF2     | 1720.35952 | -0.371447  | 0.03468187 | 0.26401649 |
| APC2        | 24.285472  | -0.8965719 | 0.03480383 | 0.26412823 |
| FIRRE       | 46.7012616 | -0.9746658 | 0.03479986 | 0.26412823 |
| FOXO4       | 180.862643 | 0.5715275  | 0.03477741 | 0.26412823 |
| LOC1002889  | 34.8548662 | 0.84667121 | 0.03471777 | 0.26412823 |
| NEK11       | 137.053172 | 0.62740364 | 0.03481808 | 0.26412823 |
| NOC3L       | 410.349646 | 0.44337025 | 0.03476272 | 0.26412823 |
| SLC34A2     | 5.37077976 | -0.979904  | 0.03480952 | 0.26412823 |
| STIP1       | 1026.56816 | -0.4568712 | 0.03473865 | 0.26412823 |
| ADC         | 72.3678863 | 0.63101383 | 0.03501644 | 0.26459398 |
| ARID5B      | 1513.06533 | 0.84319878 | 0.03499948 | 0.26459398 |
| FSCN2       | 27.2874152 | -0.8529285 | 0.03501473 | 0.26459398 |
| JAKMIP1     | 6.04890863 | 0.99025493 | 0.03496603 | 0.26459398 |

|            |            |            |            |            |
|------------|------------|------------|------------|------------|
| PPP1R14A   | 9.86507382 | -0.9199968 | 0.03493289 | 0.26459398 |
| SNORA14B   | 5.26042776 | 0.87637688 | 0.03492122 | 0.26459398 |
| SRPX       | 138.008018 | 0.97601978 | 0.03491352 | 0.26459398 |
| TRPM5      | 1.53016188 | 0.99546159 | 0.03497962 | 0.26459398 |
| TTC39C     | 58.6416238 | 0.76307779 | 0.03499878 | 0.26459398 |
| NFIB       | 2777.02954 | -0.6188451 | 0.03507957 | 0.26491273 |
| RNF11      | 1805.62384 | 0.43453384 | 0.03508909 | 0.26491273 |
| HAUS1      | 158.827873 | 0.51960255 | 0.03515599 | 0.26530261 |
| UBTF       | 2544.03829 | -0.3406819 | 0.03519528 | 0.26548384 |
| AGPAT3     | 1635.03922 | -0.4321913 | 0.03524045 | 0.2655292  |
| FCGRT      | 2874.28949 | 0.3598767  | 0.03523853 | 0.2655292  |
| LOC1001295 | 17.7800253 | 0.69886227 | 0.0352471  | 0.2655292  |
| SYNGR3     | 7.46182862 | -1.000781  | 0.03531112 | 0.26589629 |
| VTI1A      | 552.972445 | 0.40125071 | 0.03536642 | 0.26619737 |
| SCARB2     | 3176.64916 | 0.32583301 | 0.03546977 | 0.26662903 |
| TTLL7      | 27.760018  | -0.982668  | 0.03546054 | 0.26662903 |
| WLS        | 1798.1894  | 0.59845173 | 0.03545774 | 0.26662903 |
| SYNE3      | 151.007644 | 0.73825873 | 0.03550049 | 0.2667446  |
| RPL13A     | 1810.6061  | 0.45987168 | 0.03555754 | 0.26705783 |
| CYTH2      | 633.32164  | -0.363564  | 0.03563276 | 0.26739181 |
| NPHP3-ACAD | 119.16256  | 0.55941334 | 0.0356206  | 0.26739181 |
| MYOZ3      | 169.77601  | 0.94427203 | 0.0356881  | 0.26769152 |
| GUCY1A2    | 116.427027 | 0.85916668 | 0.03579798 | 0.26778011 |
| KIAA2018   | 2143.72539 | -0.3580921 | 0.03575328 | 0.26778011 |
| KLF14      | 3.63582504 | 0.97978409 | 0.03577909 | 0.26778011 |
| LSS        | 1731.01942 | -0.5449273 | 0.03578425 | 0.26778011 |
| NEK7       | 1144.26013 | 0.2764103  | 0.03582312 | 0.26778011 |
| NXPE3      | 364.574639 | 0.51878102 | 0.03580795 | 0.26778011 |
| SLC4A4     | 24287.7123 | -0.7122558 | 0.03571637 | 0.26778011 |
| SNAI3      | 22.5751323 | 0.94733467 | 0.03574754 | 0.26778011 |
| RASA4B     | 28.1553011 | 0.58545035 | 0.03593888 | 0.26852974 |
| ZNF695     | 9.3408885  | -0.9495857 | 0.03595429 | 0.26852974 |
| GGN        | 4.97282166 | -0.8823928 | 0.03599394 | 0.26860974 |
| NDUFAF3    | 578.807609 | -0.4734766 | 0.03599826 | 0.26860974 |
| UBP1       | 774.241121 | -0.3224984 | 0.03601135 | 0.26860974 |
| GRM5       | 1.94054753 | -0.9651215 | 0.03605907 | 0.26873514 |
| LINC00475  | 13.2997491 | 0.91066201 | 0.03605321 | 0.26873514 |
| THUMPD1    | 1243.52995 | 0.31078916 | 0.03607633 | 0.26874857 |
| CHST7      | 83.5367891 | 0.82950705 | 0.03609226 | 0.26875212 |
| BOP1       | 172.01269  | -0.411079  | 0.03616518 | 0.26902302 |
| GPR83      | 97.6404571 | -0.9538398 | 0.03616162 | 0.26902302 |
| PDZD4      | 1529.21641 | -0.502252  | 0.03620218 | 0.26902302 |
| PRKAG2     | 2585.51782 | -0.8612053 | 0.03622148 | 0.26902302 |
| RAB13      | 624.048858 | -0.4492747 | 0.03621693 | 0.26902302 |
| ZNF818P    | 222.047814 | 0.53413216 | 0.0361985  | 0.26902302 |
| C6orf147   | 14.0166211 | -0.9825537 | 0.03623915 | 0.26903934 |
| C16orf86   | 35.1161305 | 0.86524828 | 0.03625656 | 0.26905369 |
| NLRP1      | 391.065987 | 0.7488479  | 0.03628582 | 0.26905662 |
| PIK3C2B    | 2399.41825 | -0.3985507 | 0.0362879  | 0.26905662 |
| NAGLU      | 460.658084 | 0.53557116 | 0.03642864 | 0.26975503 |

|            |            |            |            |            |
|------------|------------|------------|------------|------------|
| PRDM6      | 1031.12253 | 0.65345811 | 0.03641457 | 0.26975503 |
| PRPF18     | 260.376656 | 0.38539382 | 0.03642342 | 0.26975503 |
| AQP6       | 1.86246211 | -0.9932409 | 0.036498   | 0.2700393  |
| HLA-DQB1   | 650.52169  | 0.98826468 | 0.03649824 | 0.2700393  |
| PTDSS2     | 506.299136 | -0.3850659 | 0.03651363 | 0.2700393  |
| RGS7       | 4.41832602 | -0.9262263 | 0.03659497 | 0.2705258  |
| NBEAL1     | 1337.42368 | 0.22721845 | 0.03662948 | 0.27066586 |
| GNG12-AS1  | 1.72735871 | 0.99228241 | 0.03667998 | 0.27080881 |
| PRIMPOL    | 210.852062 | 0.37767819 | 0.03666731 | 0.27080881 |
| CHST1      | 61.5982223 | 0.77175536 | 0.03676206 | 0.27129962 |
| CCDC40     | 156.857752 | 0.66117743 | 0.03681906 | 0.27133205 |
| FBXO2      | 43.8409303 | -0.89311   | 0.03682887 | 0.27133205 |
| NDUF51     | 1488.33693 | -0.383188  | 0.0368121  | 0.27133205 |
| ZNF552     | 100.004044 | -0.3929919 | 0.03680738 | 0.27133205 |
| ACAT2      | 258.737226 | -0.5988931 | 0.03684623 | 0.27134491 |
| ADAMTS9-A  | 78.5517199 | 0.92595895 | 0.0368785  | 0.27146758 |
| C11orf53   | 4.24123763 | -0.953657  | 0.03690322 | 0.27153458 |
| C5orf45    | 170.999118 | 0.43836375 | 0.03692222 | 0.27155949 |
| SNORA61    | 5.62742004 | 0.85225086 | 0.0369475  | 0.27163055 |
| PLXDC2     | 3376.97911 | 0.70736671 | 0.03701331 | 0.27193911 |
| VAT1       | 1964.90691 | 0.4269666  | 0.03702076 | 0.27193911 |
| GATAD1     | 1029.08666 | 0.36183963 | 0.03704203 | 0.2719805  |
| WHAMMP1    | 142.186605 | 0.41490622 | 0.03706871 | 0.27206151 |
| ATP6VOE2-A | 85.7262469 | -0.6959897 | 0.03710506 | 0.27216435 |
| BACE1      | 1317.29991 | -0.4454027 | 0.03731357 | 0.27216435 |
| BEX1       | 39.8136419 | -0.9719247 | 0.03726458 | 0.27216435 |
| CCDC88B    | 272.950148 | 0.79728827 | 0.03718194 | 0.27216435 |
| CELSR2     | 474.279088 | -0.5960277 | 0.03729918 | 0.27216435 |
| DDX42      | 2339.46004 | -0.2426831 | 0.03738784 | 0.27216435 |
| FAM154A    | 3.89490558 | -0.9360304 | 0.03732257 | 0.27216435 |
| FER1L4     | 439.225114 | -0.8545348 | 0.03712461 | 0.27216435 |
| HSPD1      | 2913.14853 | -0.5110863 | 0.037182   | 0.27216435 |
| LINC00276  | 4.40037068 | 0.96148825 | 0.03726922 | 0.27216435 |
| LINC01105  | 5.44053071 | -0.9694252 | 0.03735107 | 0.27216435 |
| MPPE1      | 397.052622 | 0.41599255 | 0.03726518 | 0.27216435 |
| MVD        | 235.281159 | -0.4819    | 0.03720862 | 0.27216435 |
| NAT8L      | 117.880009 | -0.7379688 | 0.03717656 | 0.27216435 |
| NRGN       | 29.4861336 | -0.9634807 | 0.03716261 | 0.27216435 |
| OSMR-AS1   | 9.00876576 | 0.92956971 | 0.03740528 | 0.27216435 |
| OVCA2      | 19.3162338 | -0.6679967 | 0.03728548 | 0.27216435 |
| PPP6R1     | 976.752379 | -0.3332594 | 0.03740089 | 0.27216435 |
| SLC2A14    | 12.6375939 | -0.9183478 | 0.03738874 | 0.27216435 |
| SRCIN1     | 30.5937671 | -0.8692926 | 0.03726183 | 0.27216435 |
| WNK2       | 232.285351 | -0.9785639 | 0.03741145 | 0.27216435 |
| CSMD1      | 9.1170282  | -0.9754298 | 0.03745814 | 0.27238172 |
| EPN2-IT1   | 11.3672404 | -0.645082  | 0.03748832 | 0.27238172 |
| PI15       | 12.5939787 | 0.9589599  | 0.03747694 | 0.27238172 |
| FAM135A    | 582.849453 | 0.34353757 | 0.03755554 | 0.27264223 |
| WDR83OS    | 634.424847 | 0.34802627 | 0.03755534 | 0.27264223 |
| AGAP1      | 939.829378 | -0.5406648 | 0.03761507 | 0.27294446 |



|           |            |            |            |            |
|-----------|------------|------------|------------|------------|
| ANK3      | 615.808876 | 0.88334961 | 0.03765996 | 0.27294446 |
| EZH1      | 1096.08695 | 0.43575812 | 0.03765595 | 0.27294446 |
| ZNF664    | 2470.60067 | -0.4979881 | 0.03765391 | 0.27294446 |
| PGAP2     | 188.713815 | -0.3836286 | 0.03768181 | 0.27298904 |
| ERCC3     | 718.457412 | -0.2422016 | 0.03769852 | 0.27299632 |
| QRICH2    | 216.573469 | 0.39113794 | 0.03774364 | 0.27320925 |
| FN3KRP    | 398.442907 | -0.3284363 | 0.03777543 | 0.27323028 |
| SYT15     | 406.383181 | 0.91497595 | 0.03777797 | 0.27323028 |
| TGFB1     | 580.030978 | -0.5346668 | 0.03789271 | 0.27394617 |
| DNAH12    | 58.1714389 | 0.81071247 | 0.03798345 | 0.27437399 |
| TPRG1     | 17.463735  | 0.78444605 | 0.03798056 | 0.27437399 |
| CKLF      | 58.5061326 | 0.63148063 | 0.03805237 | 0.27475773 |
| CACNA1B   | 12.0039185 | -0.8751986 | 0.03807842 | 0.27483166 |
| MYOZ2     | 5.18289622 | 0.83093099 | 0.03810704 | 0.27492412 |
| PHLPP2    | 1183.73254 | -0.562468  | 0.03812337 | 0.27492783 |
| SIL1      | 686.971136 | 0.33283409 | 0.0381761  | 0.27519397 |
| FAM64A    | 10.391731  | -0.8525901 | 0.03830648 | 0.27601935 |
| CCDC144CP | 66.9508236 | -0.905738  | 0.03832646 | 0.27604897 |
| TIAF1     | 11.8817602 | 0.75044325 | 0.03841384 | 0.27656372 |
| HERC2P4   | 32.1324526 | 0.82055504 | 0.03851397 | 0.27679492 |
| KYNU      | 51.9773702 | 0.75095315 | 0.03852555 | 0.27679492 |
| MSANTD4   | 432.318757 | -0.3550136 | 0.03849801 | 0.27679492 |
| NMRAL1    | 259.075588 | -0.3941105 | 0.03848415 | 0.27679492 |
| TMEM135   | 771.840731 | 0.42894507 | 0.03850375 | 0.27679492 |
| NPHP3     | 217.800124 | 0.38648862 | 0.03855988 | 0.27686616 |
| SGK1      | 3291.86491 | 0.72493874 | 0.03856731 | 0.27686616 |
| DDX60L    | 700.60564  | 0.60851751 | 0.03869754 | 0.27758989 |
| DIP2B     | 3919.77241 | -0.4690283 | 0.03879772 | 0.27758989 |
| FASTKD1   | 276.731299 | -0.4789059 | 0.03880436 | 0.27758989 |
| ID1       | 4110.57193 | -0.7231956 | 0.03882778 | 0.27758989 |
| LRRTM3    | 9.40772064 | 0.98000564 | 0.0387396  | 0.27758989 |
| PNRC1     | 3128.78958 | 0.43819271 | 0.03875454 | 0.27758989 |
| RAB14     | 1924.84922 | -0.2612497 | 0.03874292 | 0.27758989 |
| RORB      | 1.62774479 | -0.9797824 | 0.03881327 | 0.27758989 |
| SERPINB10 | 8.33163944 | -0.9144987 | 0.03877234 | 0.27758989 |
| SLC25A45  | 147.61706  | 0.62118175 | 0.03873417 | 0.27758989 |
| ATXN3     | 581.57186  | 0.44100273 | 0.03892935 | 0.27764708 |
| GINS2     | 42.0889261 | -0.8352946 | 0.03892591 | 0.27764708 |
| GPATCH2L  | 1484.39881 | 0.36816066 | 0.0389414  | 0.27764708 |
| KIAA1107  | 109.141259 | 0.63050183 | 0.03885714 | 0.27764708 |
| TLR5      | 148.833926 | 0.74492331 | 0.03894756 | 0.27764708 |
| TOB2P1    | 10.9223073 | -0.8764541 | 0.03889478 | 0.27764708 |
| ZNF420    | 203.638408 | 0.33751207 | 0.03886877 | 0.27764708 |
| ITIH2     | 1752.42222 | 0.93301819 | 0.03904268 | 0.27821113 |
| B4GALT6   | 216.64172  | 0.76572121 | 0.03908714 | 0.27829976 |
| FCGR1C    | 34.4507193 | 0.84471474 | 0.0390761  | 0.27829976 |
| LCMT2     | 267.380127 | -0.3066983 | 0.03911401 | 0.27837709 |
| FKBP9P1   | 24.7579199 | -0.5828345 | 0.03916063 | 0.27848095 |
| RNF215    | 144.334746 | 0.45272736 | 0.03915016 | 0.27848095 |
| LNX2      | 655.694719 | -0.4972547 | 0.0391951  | 0.27849827 |

|            |            |            |            |            |
|------------|------------|------------|------------|------------|
| TECR       | 981.190268 | -0.5920261 | 0.0391848  | 0.27849827 |
| ATP2A2     | 3946.51702 | -0.3700324 | 0.03923312 | 0.2785407  |
| ZNF546     | 176.07313  | 0.36932821 | 0.03922869 | 0.2785407  |
| HNMT       | 808.408315 | 0.5708467  | 0.03928812 | 0.27858609 |
| NELFB      | 549.339786 | -0.2324227 | 0.03926873 | 0.27858609 |
| PRDM11     | 492.612181 | -0.5537795 | 0.03928216 | 0.27858609 |
| SHC1       | 2585.34972 | -0.3836242 | 0.0393036  | 0.27858609 |
| PKD1L1     | 29.6010199 | 0.59083965 | 0.03933829 | 0.27871835 |
| CAMKV      | 1.95861817 | -0.9558379 | 0.0394467  | 0.27894917 |
| CXorf56    | 286.172069 | 0.31128574 | 0.03944325 | 0.27894917 |
| EXD2       | 418.322305 | 0.46965836 | 0.03947098 | 0.27894917 |
| FOXD3      | 25.5408077 | -0.8422214 | 0.03948317 | 0.27894917 |
| MRPL38     | 379.883053 | -0.3578318 | 0.03941678 | 0.27894917 |
| OTUD3      | 342.720203 | 0.54628104 | 0.03941529 | 0.27894917 |
| PHC2       | 939.108051 | 0.56937968 | 0.03947721 | 0.27894917 |
| SKIV2L2    | 1139.41776 | 0.22666279 | 0.03952093 | 0.27910249 |
| CACNB1     | 106.946898 | -0.4259483 | 0.03968374 | 0.27968375 |
| GALC       | 475.483135 | 0.49014461 | 0.03971583 | 0.27968375 |
| GTSE1      | 22.783406  | -0.7654897 | 0.03968434 | 0.27968375 |
| KIAA1671   | 4178.60918 | -0.4680113 | 0.03971123 | 0.27968375 |
| LINC01265  | 1.61050231 | 0.95983242 | 0.03968306 | 0.27968375 |
| USP24      | 2514.80313 | 0.39673101 | 0.03969653 | 0.27968375 |
| ZNF674     | 102.182652 | 0.41269988 | 0.03971143 | 0.27968375 |
| OSBPL7     | 301.615877 | -0.3514729 | 0.0397483  | 0.27979907 |
| COQ3       | 34.8927639 | 0.47306689 | 0.03988284 | 0.27998788 |
| GBP4       | 262.006052 | 0.66867836 | 0.0398918  | 0.27998788 |
| ID2        | 898.420445 | -0.4995397 | 0.03986119 | 0.27998788 |
| KIAA1045   | 11.2153267 | 0.90206335 | 0.03990395 | 0.27998788 |
| LOC1005070 | 10.033383  | 0.9612159  | 0.03981877 | 0.27998788 |
| LSM12      | 247.51395  | -0.4094184 | 0.03989536 | 0.27998788 |
| SNORA22    | 82.3157269 | -0.7239715 | 0.03990095 | 0.27998788 |
| TMC6       | 650.804923 | -0.5914718 | 0.03986002 | 0.27998788 |
| CDKL3      | 50.8509108 | 0.5320423  | 0.03994706 | 0.28002269 |
| CLPB       | 432.194066 | -0.3884781 | 0.04000713 | 0.28002269 |
| DECR1      | 543.588583 | -0.6387604 | 0.04006019 | 0.28002269 |
| EIF4G1     | 5224.34861 | -0.296015  | 0.04006996 | 0.28002269 |
| EMBP1      | 14.9684546 | 0.77437996 | 0.03992694 | 0.28002269 |
| HPGD       | 212.75152  | 0.92319221 | 0.04004075 | 0.28002269 |
| METTL12    | 19.3847977 | 0.68775744 | 0.0400079  | 0.28002269 |
| RPS19BP1   | 273.786213 | 0.4133929  | 0.03999735 | 0.28002269 |
| USP4       | 1133.65029 | -0.3290514 | 0.04004966 | 0.28002269 |
| UTP6       | 497.334396 | 0.27866161 | 0.04006333 | 0.28002269 |
| CBWD6      | 17.4164562 | 0.63629035 | 0.04013679 | 0.28037703 |
| C16orf45   | 174.210899 | 0.8525631  | 0.04017666 | 0.28043018 |
| PPIE       | 306.342668 | 0.31910308 | 0.04017501 | 0.28043018 |
| TACR2      | 2.0019773  | 0.97449705 | 0.0401972  | 0.28046096 |
| LOC286189  | 1213.88053 | -0.9699566 | 0.04022334 | 0.28053076 |
| TBC1D10C   | 21.3504227 | 0.84287821 | 0.04025345 | 0.28062821 |
| MON1B      | 625.888486 | -0.2900557 | 0.0402717  | 0.28064289 |
| GUSBP1     | 289.508559 | 0.38775115 | 0.04034543 | 0.28104405 |

|            |            |            |            |            |
|------------|------------|------------|------------|------------|
| NOTCH2NL   | 1812.35424 | 0.40534241 | 0.04036501 | 0.28106786 |
| ADAMTS5    | 1435.55644 | -0.9749045 | 0.04040562 | 0.28112546 |
| RPS6KA2    | 1477.71851 | -0.6975398 | 0.04039187 | 0.28112546 |
| DLEU2L     | 30.1131164 | 0.64951506 | 0.04044899 | 0.28131466 |
| KIAA0247   | 3463.6778  | 0.58145639 | 0.04047187 | 0.28136121 |
| CDPF1      | 67.310882  | 0.46731311 | 0.04056973 | 0.28192882 |
| CLEC4E     | 71.3540307 | 0.93012997 | 0.04075964 | 0.28246006 |
| HCG22      | 5.93490261 | -0.9715639 | 0.04071886 | 0.28246006 |
| LINC00323  | 2.7576419  | 0.96089158 | 0.04071497 | 0.28246006 |
| PTGER4     | 309.770798 | 0.78655975 | 0.04077254 | 0.28246006 |
| RP2        | 362.398583 | 0.35725184 | 0.04070312 | 0.28246006 |
| SLC22A18AS | 5.34057598 | -0.9057135 | 0.04068452 | 0.28246006 |
| TRNAU1AP   | 132.166352 | 0.50026665 | 0.04075716 | 0.28246006 |
| WASH2P     | 241.322685 | 0.30790242 | 0.04077614 | 0.28246006 |
| ZMIZ2      | 1118.4873  | -0.412152  | 0.04084787 | 0.28284425 |
| EVC2       | 263.517941 | 0.47527855 | 0.04096566 | 0.28308504 |
| HCST       | 62.2666162 | 0.84821338 | 0.04097885 | 0.28308504 |
| LILRB3     | 29.3745786 | 0.84531263 | 0.04096135 | 0.28308504 |
| MT1M       | 13.5097112 | 0.97096011 | 0.04099434 | 0.28308504 |
| MXD1       | 166.900415 | -0.5213509 | 0.04099661 | 0.28308504 |
| PTK2       | 2184.08681 | -0.313606  | 0.04099124 | 0.28308504 |
| SNHG3      | 255.161288 | 0.44215988 | 0.0409767  | 0.28308504 |
| SLC25A36   | 1329.68039 | -0.1728363 | 0.04116008 | 0.28410098 |
| BAIAP2     | 431.548201 | -0.5619958 | 0.04118086 | 0.28413159 |
| ETV7       | 20.7666495 | 0.76900607 | 0.04122356 | 0.28420065 |
| UBA52      | 3056.02804 | 0.24701963 | 0.04122226 | 0.28420065 |
| SNAPC4     | 268.847905 | -0.3488743 | 0.04124692 | 0.28424897 |
| CXCR3      | 3.04927541 | 0.92420772 | 0.04133557 | 0.28447916 |
| LOC1005061 | 1.79249043 | -0.9706678 | 0.04129708 | 0.28447916 |
| NFYA       | 846.842545 | -0.3650932 | 0.04133834 | 0.28447916 |
| SETDB1     | 816.874861 | -0.2409091 | 0.04134577 | 0.28447916 |
| ANKRD23    | 96.223187  | -0.4318454 | 0.04150213 | 0.28487859 |
| ARHGEF5    | 274.458753 | -0.6868734 | 0.04150168 | 0.28487859 |
| COL20A1    | 1.5024451  | -0.9296306 | 0.04148906 | 0.28487859 |
| LRRC69     | 11.0172308 | 0.71104639 | 0.04146291 | 0.28487859 |
| PPP2R2C    | 67.9105492 | -0.925748  | 0.0414429  | 0.28487859 |
| TM2D1      | 267.65153  | 0.47012112 | 0.04147922 | 0.28487859 |
| LOC1005056 | 1.976428   | 0.96813859 | 0.04163031 | 0.2855445  |
| LSR        | 605.967045 | -0.6954349 | 0.04163198 | 0.2855445  |
| C11orf44   | 3.34314401 | 0.95579203 | 0.04171523 | 0.28559111 |
| EME1       | 22.828361  | -0.7525498 | 0.04174326 | 0.28559111 |
| ENOSF1     | 516.889486 | 0.48468703 | 0.04176191 | 0.28559111 |
| SC5D       | 790.465922 | -0.4000192 | 0.04168044 | 0.28559111 |
| SLC25A33   | 50.5915034 | 0.52880828 | 0.04168847 | 0.28559111 |
| SSR4P1     | 22.3712592 | 0.80388528 | 0.04177018 | 0.28559111 |
| STRIP2     | 393.494214 | 0.73135434 | 0.04172355 | 0.28559111 |
| TST        | 128.347208 | 0.61884557 | 0.04172484 | 0.28559111 |
| BCAM       | 568.944732 | -0.6035557 | 0.04182968 | 0.28564772 |
| C15orf26   | 3.15347247 | 0.95206342 | 0.04182089 | 0.28564772 |
| NALCN-AS1  | 3.36293138 | 0.90632322 | 0.04186061 | 0.28564772 |

|            |            |            |            |            |
|------------|------------|------------|------------|------------|
| RPL34      | 3177.36785 | 0.39208666 | 0.04181979 | 0.28564772 |
| UNK        | 789.817844 | -0.3916629 | 0.04184508 | 0.28564772 |
| PTBP1      | 2385.01573 | -0.2631175 | 0.04190619 | 0.28584658 |
| ADAMTS19   | 5.3261175  | -0.9626264 | 0.04195864 | 0.28597993 |
| RTKN       | 268.719071 | -0.4798178 | 0.04195235 | 0.28597993 |
| GRAP2      | 9.70566292 | 0.87476423 | 0.04203423 | 0.28615864 |
| RTCB       | 599.536946 | 0.41546102 | 0.04202577 | 0.28615864 |
| SLED1      | 25.0878902 | 0.86358713 | 0.04200634 | 0.28615864 |
| TTC37      | 2394.99473 | 0.26702345 | 0.04211414 | 0.28647828 |
| ZNF79      | 186.869571 | 0.23541471 | 0.04210415 | 0.28647828 |
| NFX1       | 1195.24434 | -0.1951308 | 0.04214364 | 0.28656689 |
| IFI44      | 285.241207 | 0.59863159 | 0.0422413  | 0.28711865 |
| DLGAP1-AS1 | 88.9253748 | 0.50366055 | 0.04230148 | 0.287187   |
| GABRB3     | 109.156666 | -0.949475  | 0.04231394 | 0.287187   |
| LINC00467  | 48.1299689 | -0.5490448 | 0.04231743 | 0.287187   |
| TTC38      | 187.246504 | 0.29736853 | 0.04229642 | 0.287187   |
| ADAMTSL4-A | 102.696984 | 0.61427842 | 0.04238578 | 0.28753865 |
| ALKBH6     | 64.143404  | -0.371156  | 0.04244112 | 0.28757743 |
| CABP4      | 9.76031284 | 0.85237259 | 0.04241314 | 0.28757743 |
| CCDC22     | 161.935695 | 0.26618439 | 0.04243777 | 0.28757743 |
| ITPKB      | 5621.1047  | -0.6236363 | 0.0424676  | 0.2876448  |
| CKAP2      | 501.713985 | -0.5279695 | 0.04252181 | 0.2876468  |
| FANCI      | 241.138936 | -0.5835618 | 0.04253138 | 0.2876468  |
| MGP        | 3466.97637 | 0.70719482 | 0.0425319  | 0.2876468  |
| POTEE      | 35.4809727 | -0.7103817 | 0.04253407 | 0.2876468  |
| UBE2Q2L    | 6.5495613  | 0.90795395 | 0.04257327 | 0.28779993 |
| AHCTF1P1   | 9.57267473 | -0.584194  | 0.0426179  | 0.28796384 |
| OSTF1      | 258.101705 | 0.35996855 | 0.0426472  | 0.28796384 |
| VAV1       | 198.851952 | 0.70774269 | 0.04263493 | 0.28796384 |
| C16orf13   | 273.156004 | -0.4253561 | 0.04268495 | 0.28799505 |
| FAM214A    | 1066.45972 | -0.2976284 | 0.04267105 | 0.28799505 |
| GSE1       | 961.637756 | -0.500252  | 0.0427313  | 0.28819594 |
| LOC730668  | 1.78567214 | 0.96328442 | 0.04275556 | 0.28824774 |
| CDK15      | 8.91276692 | 0.81768196 | 0.0428419  | 0.28838986 |
| CNTLN      | 892.186498 | 0.39205643 | 0.04285587 | 0.28838986 |
| GYS1       | 1074.6438  | -0.4524089 | 0.04284256 | 0.28838986 |
| LOC1002870 | 28.870373  | 0.49861823 | 0.04285957 | 0.28838986 |
| TRIB1      | 354.230735 | 0.76633852 | 0.04285382 | 0.28838986 |
| TRAPPC8    | 1177.13316 | 0.34341445 | 0.04295208 | 0.28890051 |
| USH1G      | 3.39075486 | -0.9622049 | 0.04297944 | 0.28897273 |
| CROCCP2    | 217.771915 | 0.58548456 | 0.04304754 | 0.28931872 |
| METTL4     | 173.834149 | 0.5205981  | 0.04312085 | 0.28969946 |
| SHC4       | 331.458492 | 0.9511609  | 0.0431733  | 0.28993981 |
| FIBIN      | 2512.43172 | 0.95311768 | 0.0433223  | 0.29004424 |
| LMO3       | 257.411734 | -0.9039116 | 0.04326791 | 0.29004424 |
| MAOB       | 23.0810582 | -0.9566028 | 0.0432092  | 0.29004424 |
| NBPF1      | 1058.6085  | 0.59269936 | 0.04331653 | 0.29004424 |
| PIP5KL1    | 8.72167291 | -0.8441203 | 0.04331675 | 0.29004424 |
| SCNN1A     | 265.462006 | -0.904087  | 0.04323406 | 0.29004424 |
| SELP       | 10.6456268 | 0.94193629 | 0.04328746 | 0.29004424 |

|            |            |            |            |            |
|------------|------------|------------|------------|------------|
| TP53INP2   | 947.562047 | -0.6328973 | 0.04326257 | 0.29004424 |
| EMC10      | 1546.48423 | -0.3530551 | 0.04335669 | 0.2901627  |
| MIR497HG   | 109.841497 | 0.91303159 | 0.0433977  | 0.29032543 |
| TNS3       | 2943.11639 | 0.80248531 | 0.04343138 | 0.29043903 |
| ANKRD12    | 2187.73232 | 0.46872549 | 0.043476   | 0.29062559 |
| FBXL19     | 330.298453 | -0.3100256 | 0.0435186  | 0.29068684 |
| ZBED3      | 60.9603196 | -0.3935176 | 0.04351235 | 0.29068684 |
| LOC1019290 | 1.77766921 | -0.9503286 | 0.04355859 | 0.29074106 |
| SIRPG      | 4.37519364 | 0.95645146 | 0.04356016 | 0.29074106 |
| HUWE1      | 9730.49811 | -0.2625652 | 0.04358138 | 0.29077108 |
| DYNLL2     | 616.044834 | -0.4173644 | 0.04361754 | 0.2907892  |
| WASF1      | 461.888544 | -0.5305168 | 0.04360794 | 0.2907892  |
| HCRTR2     | 4.31407248 | -0.8998055 | 0.04365774 | 0.29083846 |
| MYBPC1     | 3.65131557 | 0.95932228 | 0.04365839 | 0.29083846 |
| SLC2A13    | 213.268905 | 0.60376678 | 0.0436965  | 0.29098089 |
| ZMYND10    | 12.264362  | -0.8560196 | 0.04371423 | 0.29098751 |
| FGF13      | 8.18410415 | -0.8882587 | 0.0439075  | 0.29193871 |
| KIF24      | 85.522181  | -0.562611  | 0.04390097 | 0.29193871 |
| MTF2       | 351.699367 | 0.42817369 | 0.04390619 | 0.29193871 |
| PSMD1      | 1420.84667 | -0.2526515 | 0.04396231 | 0.29206771 |
| 9-Sep      | 1748.75227 | -0.4937572 | 0.04394986 | 0.29206771 |
| SLC38A5    | 38.4038245 | -0.9583982 | 0.0439773  | 0.29206771 |
| SWSAP1     | 34.4959614 | 0.53393653 | 0.0440626  | 0.2925225  |
| BRSK2      | 19.7095977 | -0.8588042 | 0.04418768 | 0.29254192 |
| CD27       | 3.71353994 | 0.90592269 | 0.04410482 | 0.29254192 |
| KCNC3      | 539.258124 | -0.8343294 | 0.04410171 | 0.29254192 |
| LINC01301  | 7.06696249 | 0.78560787 | 0.04415588 | 0.29254192 |
| LRMP       | 96.1043249 | 0.67402319 | 0.04418981 | 0.29254192 |
| MED7       | 155.382569 | 0.36791183 | 0.04421261 | 0.29254192 |
| SEC61G     | 219.102531 | 0.51558555 | 0.04414365 | 0.29254192 |
| TMEM41B    | 787.160006 | -0.404528  | 0.04419822 | 0.29254192 |
| WIPF1      | 925.040568 | 0.38878534 | 0.04421695 | 0.29254192 |
| COL7A1     | 348.596038 | -0.7535239 | 0.04431774 | 0.29291774 |
| GNB1L      | 27.6817308 | 0.57914862 | 0.0443243  | 0.29291774 |
| LMBR1      | 999.988112 | -0.3653125 | 0.04430995 | 0.29291774 |
| AKNA       | 719.385753 | 0.46354284 | 0.04437634 | 0.29315024 |
| INTS5      | 349.558358 | -0.3500775 | 0.04440249 | 0.29321155 |
| GATSL2     | 337.483828 | -0.3708043 | 0.04444761 | 0.29328675 |
| ULK2       | 730.680421 | 0.38070753 | 0.04443386 | 0.29328675 |
| FBN2       | 2872.10129 | -0.7653572 | 0.0444648  | 0.29328888 |
| LTBP1      | 2896.08338 | 0.85791888 | 0.04449028 | 0.29334569 |
| EVI5       | 978.685723 | 0.45161334 | 0.04453615 | 0.29341793 |
| MRAP2      | 153.979706 | 0.91878261 | 0.04455187 | 0.29341793 |
| SCNN1D     | 89.680802  | 0.71211548 | 0.04455012 | 0.29341793 |
| DR1        | 582.102461 | 0.37801972 | 0.04465429 | 0.29397323 |
| RNGTT      | 446.381462 | 0.39747349 | 0.04467    | 0.29397323 |
| ZNF837     | 16.6585097 | -0.5427916 | 0.04469781 | 0.29404493 |
| NAT6       | 117.547097 | -0.3856552 | 0.04476432 | 0.294265   |
| PARK2      | 103.664163 | 0.44447917 | 0.04476511 | 0.294265   |
| SFRP1      | 1520.13925 | 0.95455218 | 0.04479514 | 0.29435113 |

|            |            |            |            |            |
|------------|------------|------------|------------|------------|
| DUSP5      | 359.280666 | 0.91539134 | 0.04489438 | 0.29444681 |
| GOPC       | 851.428014 | 0.35783465 | 0.04488667 | 0.29444681 |
| PRKG1      | 436.752065 | 0.8351847  | 0.04486087 | 0.29444681 |
| PTPRO      | 94.9805703 | 0.72649477 | 0.04486459 | 0.29444681 |
| WBP11P1    | 1.73634311 | -0.9348516 | 0.04482732 | 0.29444681 |
| GPNMB      | 1342.43008 | 0.85043772 | 0.04492371 | 0.29452813 |
| DMGDH      | 199.327808 | 0.74540831 | 0.04496428 | 0.29468298 |
| PLXNB1     | 2311.72592 | -0.4901985 | 0.04504786 | 0.2951195  |
| LOC283731  | 3.17339451 | -0.9497984 | 0.04506819 | 0.29514148 |
| WDSUB1     | 175.170855 | -0.380831  | 0.04513163 | 0.29544568 |
| NDUFA3     | 506.233513 | -0.405626  | 0.04518398 | 0.29561382 |
| SYCE1      | 8.86085681 | -0.9517531 | 0.04519132 | 0.29561382 |
| BTAF1      | 1767.50489 | 0.17800532 | 0.04520866 | 0.295616   |
| GNPDA1     | 359.808631 | 0.3257884  | 0.04524951 | 0.29577188 |
| C1orf127   | 1.6519177  | 0.95166105 | 0.04526675 | 0.29577339 |
| POLD2      | 674.226927 | -0.3794372 | 0.04536549 | 0.29630719 |
| ISM1       | 121.316402 | 0.80609013 | 0.04541284 | 0.29650507 |
| SBNO1      | 2025.96316 | -0.2600983 | 0.04548049 | 0.29683533 |
| PIPOX      | 10.7821296 | 0.80079089 | 0.04554955 | 0.29717451 |
| CKB        | 543.700268 | -0.818191  | 0.04559414 | 0.29735384 |
| ZYG11B     | 1407.04465 | 0.40738391 | 0.0456588  | 0.29766388 |
| C1QL1      | 95.9093743 | -0.7844572 | 0.04574449 | 0.29793183 |
| NLRC3      | 32.2614304 | 0.65548339 | 0.04573992 | 0.29793183 |
| ZNF75A     | 298.591548 | -0.3565064 | 0.04575131 | 0.29793183 |
| DOK2       | 25.7160803 | 0.8144571  | 0.0458229  | 0.29823291 |
| WWC2-AS2   | 19.7000961 | 0.72035755 | 0.04583185 | 0.29823291 |
| ANO5       | 281.493821 | -0.6538425 | 0.04585117 | 0.29824702 |
| FAM182A    | 5.33468726 | 0.94791167 | 0.0458933  | 0.29840944 |
| LOC284837  | 11.4445821 | 0.91360546 | 0.04598457 | 0.29880105 |
| RDH16      | 4.14568512 | 0.88000874 | 0.0459879  | 0.29880105 |
| ANKAR      | 238.662382 | 0.43771399 | 0.04616632 | 0.29950803 |
| CDCP1      | 73.9957181 | 0.82021306 | 0.04618284 | 0.29950803 |
| FBXW5      | 828.395571 | -0.2794455 | 0.04618045 | 0.29950803 |
| SCARB1     | 825.771898 | -0.5199057 | 0.04615642 | 0.29950803 |
| SNAI1      | 19.4417949 | 0.91833427 | 0.04616909 | 0.29950803 |
| MIR22HG    | 653.439819 | -0.4608408 | 0.04631308 | 0.30012881 |
| USP32P1    | 358.63198  | -0.9432735 | 0.04631262 | 0.30012881 |
| AKAP12     | 19704.2877 | -0.7720792 | 0.04633769 | 0.30017635 |
| CLYBL      | 85.1579792 | -0.469573  | 0.04637196 | 0.3002865  |
| CD53       | 485.928798 | 0.66395396 | 0.0464503  | 0.30068179 |
| C15orf52   | 608.184476 | -0.6403437 | 0.0465194  | 0.3008368  |
| CDH5       | 1483.66981 | 0.6456579  | 0.04652615 | 0.3008368  |
| RAB24      | 751.407439 | -0.5427453 | 0.0465099  | 0.3008368  |
| CCDC183-AS | 89.6165992 | -0.4844973 | 0.04654886 | 0.30084915 |
| SGTB       | 283.356978 | 0.49289144 | 0.0465803  | 0.30084915 |
| TMED5      | 816.950538 | 0.48449716 | 0.04659727 | 0.30084915 |
| TOP1       | 1784.25218 | -0.3280322 | 0.04659456 | 0.30084915 |
| AURKA      | 48.2167656 | -0.7498923 | 0.04662376 | 0.30090843 |
| PIP5K1A    | 1201.38879 | -0.3162666 | 0.04666682 | 0.30107456 |
| CD8B       | 4.98520529 | 0.9243526  | 0.0467169  | 0.30128587 |

|             |            |            |            |            |
|-------------|------------|------------|------------|------------|
| ABCA2       | 1113.26001 | -0.6230317 | 0.04693734 | 0.30237109 |
| CRIP2       | 881.359008 | -0.5014141 | 0.04693264 | 0.30237109 |
| NFATC1      | 141.036928 | 0.53192557 | 0.04691361 | 0.30237109 |
| GMFB        | 926.104862 | 0.39830045 | 0.04698399 | 0.30244283 |
| RUNX1       | 794.618285 | 0.61779157 | 0.04700066 | 0.30244283 |
| ZNRF1       | 137.344578 | -0.4064314 | 0.04698042 | 0.30244283 |
| TRAF3IP2-AS | 116.932994 | 0.68729841 | 0.04702317 | 0.30247573 |
| NCAPD3      | 474.440757 | -0.3325282 | 0.04709418 | 0.30248488 |
| NOMO2       | 245.96431  | -0.4276906 | 0.04708711 | 0.30248488 |
| SUN2        | 1042.3393  | 0.37276993 | 0.04706847 | 0.30248488 |
| ZNF322      | 280.01766  | 0.34456843 | 0.04708386 | 0.30248488 |
| ASTE1       | 130.865478 | 0.35352731 | 0.04721051 | 0.30258722 |
| CCDC28B     | 30.9187655 | -0.5734882 | 0.04720531 | 0.30258722 |
| FAM107B     | 374.274453 | 0.61565622 | 0.04721072 | 0.30258722 |
| FANCC       | 205.108414 | -0.4764945 | 0.04724934 | 0.30258722 |
| HUS1B       | 5.50991741 | 0.73628231 | 0.04723877 | 0.30258722 |
| LOC1001283  | 55.9449318 | -0.6826616 | 0.0472349  | 0.30258722 |
| PAK6        | 61.678803  | -0.7186164 | 0.04722083 | 0.30258722 |
| PSMB10      | 245.533605 | 0.46123952 | 0.04724287 | 0.30258722 |
| RPH3A       | 3.86726321 | -0.9281386 | 0.04728725 | 0.3026071  |
| TSC22D3     | 5893.87706 | 0.69254925 | 0.04727999 | 0.3026071  |
| ECM2        | 2114.20237 | 0.58065472 | 0.04734936 | 0.30276786 |
| LINC00630   | 107.746742 | 0.30774267 | 0.04741686 | 0.30276786 |
| NUDT8       | 29.988286  | -0.5856036 | 0.04740602 | 0.30276786 |
| STK10       | 550.878994 | 0.49129415 | 0.0473968  | 0.30276786 |
| WDR70       | 505.760183 | 0.30506455 | 0.04735512 | 0.30276786 |
| ZHX3        | 2889.82775 | 0.44074633 | 0.04740822 | 0.30276786 |
| KCNJ1       | 1.9227854  | 0.91286626 | 0.04750044 | 0.30307892 |
| MAPK8IP1    | 255.612486 | -0.6632929 | 0.04749287 | 0.30307892 |
| TRIM61      | 28.8714327 | 0.51759913 | 0.04752268 | 0.30310961 |
| SURF2       | 70.7155327 | -0.5171059 | 0.04755943 | 0.3032328  |
| C16orf52    | 369.614216 | 0.32595714 | 0.04770311 | 0.30331054 |
| CTNNBIP1    | 314.583598 | 0.51387594 | 0.04767756 | 0.30331054 |
| KCTD15      | 433.055575 | -0.5405209 | 0.04763388 | 0.30331054 |
| PRKDC       | 8244.70853 | -0.3268692 | 0.04770123 | 0.30331054 |
| SCN2B       | 214.053607 | 0.93393556 | 0.04771118 | 0.30331054 |
| TLR8        | 59.0842709 | 0.81838735 | 0.04761667 | 0.30331054 |
| TNPO1       | 4825.76039 | 0.1972061  | 0.04770198 | 0.30331054 |
| ZIM2        | 5.68833354 | 0.93308547 | 0.04764045 | 0.30331054 |
| MRPL2       | 147.338194 | -0.3713688 | 0.04774244 | 0.30334026 |
| YRDC        | 71.4831759 | 0.48162034 | 0.04775075 | 0.30334026 |
| SNORA37     | 16.933543  | 0.69139394 | 0.04778284 | 0.30343326 |
| CD1D        | 19.2970154 | 0.7927279  | 0.04785619 | 0.30378811 |
| GIMAP2      | 106.844767 | 0.61054064 | 0.04795187 | 0.30417333 |
| IL6R        | 408.794325 | 0.67673822 | 0.04793608 | 0.30417333 |
| ADPGK       | 686.831391 | 0.20413597 | 0.04797935 | 0.30419582 |
| NSUN6       | 204.629373 | 0.3824202  | 0.0479904  | 0.30419582 |
| SNRNP40     | 315.690534 | 0.38329332 | 0.04800869 | 0.30420084 |
| ARG2        | 84.9546397 | -0.8776643 | 0.04803216 | 0.30423867 |
| FAM171B     | 1040.68248 | -0.5770648 | 0.04807213 | 0.3043692  |

|           |            |            |            |            |
|-----------|------------|------------|------------|------------|
| SEPHS2    | 427.28759  | -0.5243923 | 0.04808778 | 0.3043692  |
| ARMC4     | 17.2263311 | 0.90788017 | 0.04818573 | 0.30487822 |
| ADRA1B    | 47.8037431 | -0.7610955 | 0.04827205 | 0.30500707 |
| KIF26B    | 39.7559684 | 0.83665612 | 0.0483013  | 0.30500707 |
| LINC01355 | 183.701257 | 0.50311172 | 0.04829469 | 0.30500707 |
| RBM15B    | 1090.19787 | -0.3544174 | 0.04831135 | 0.30500707 |
| TFIP11    | 298.42584  | 0.39494605 | 0.04824768 | 0.30500707 |
| TXNL4B    | 135.781901 | 0.63822061 | 0.04823438 | 0.30500707 |
| LOC286437 | 175.031258 | 0.36908347 | 0.04833319 | 0.30503419 |
| CDH11     | 6758.83287 | 0.54681225 | 0.04840823 | 0.30528615 |
| STXBP3    | 519.581978 | 0.42072713 | 0.04840435 | 0.30528615 |
| NSFP1     | 3.32927051 | -0.7865296 | 0.04846023 | 0.30539254 |
| SORL1     | 3635.39636 | 0.80154822 | 0.0484478  | 0.30539254 |
| STAG3L4   | 221.070652 | -0.3820309 | 0.048486   | 0.30544421 |
| TMEM186   | 89.1699913 | -0.3715173 | 0.04851564 | 0.30552028 |
| SP9       | 3.15825321 | 0.82645837 | 0.04853951 | 0.30555991 |
| ZBTB5     | 462.398136 | -0.3487669 | 0.04858045 | 0.30570695 |
| TATDN3    | 199.236772 | 0.37381639 | 0.04868334 | 0.30624356 |
| CTLA4     | 5.47144335 | 0.93514186 | 0.04880602 | 0.30644691 |
| EHD2      | 2028.46351 | -0.5644265 | 0.04878837 | 0.30644691 |
| GSKIP     | 97.0750007 | 0.49543181 | 0.04882141 | 0.30644691 |
| TIRAP     | 193.758405 | -0.3128189 | 0.04874435 | 0.30644691 |
| TMEM236   | 14.8728875 | 0.88269081 | 0.04878378 | 0.30644691 |
| TNNT3     | 45.6100178 | 0.93354857 | 0.04879467 | 0.30644691 |
| RCAN1     | 529.094012 | 0.4666429  | 0.04887168 | 0.30665174 |
| OSCAR     | 32.6224729 | 0.7267398  | 0.04893682 | 0.3069497  |
| GPC5      | 13.9935055 | -0.9187894 | 0.04896355 | 0.3070066  |
| CD2BP2    | 853.420835 | 0.25752319 | 0.0490294  | 0.30728173 |
| HDAC5     | 819.52194  | 0.30800647 | 0.04905454 | 0.30728173 |
| KRTCAP2   | 623.068545 | -0.370615  | 0.04907238 | 0.30728173 |
| SAP25     | 86.1624175 | -0.5272342 | 0.04907813 | 0.30728173 |
| TMED7     | 1839.22977 | 0.32979033 | 0.04911824 | 0.3074222  |
| C9orf85   | 68.9065386 | 0.30403354 | 0.04916561 | 0.30760794 |
| PKN3      | 123.782766 | -0.6064484 | 0.04927569 | 0.30818574 |
| HIST1H3D  | 191.583063 | -0.4359402 | 0.04935623 | 0.30850867 |
| LINC00174 | 192.661821 | -0.4723448 | 0.04936281 | 0.30850867 |
| AIG1      | 499.254886 | 0.38083614 | 0.04948433 | 0.30874822 |
| ARHGAP11B | 25.1563681 | -0.7393604 | 0.04948992 | 0.30874822 |
| ATXN2L    | 1440.30119 | -0.309118  | 0.0494512  | 0.30874822 |
| PCDHGA4   | 470.603934 | -0.7420188 | 0.04947812 | 0.30874822 |
| RAD51AP1  | 44.2764752 | -0.5877783 | 0.04948085 | 0.30874822 |
| EEFSEC    | 173.901142 | -0.3964343 | 0.04957259 | 0.30915299 |
| CLN3      | 283.514403 | -0.2457046 | 0.0496046  | 0.30924172 |
| MAGI2-AS3 | 1820.77999 | 0.37209514 | 0.04964695 | 0.3093948  |
| ABCC11    | 3.62557008 | -0.8466062 | 0.04978182 | 0.30946668 |
| BRWD1-IT2 | 17.1921556 | -0.6475554 | 0.04978799 | 0.30946668 |
| GUSBP4    | 51.3890277 | 0.50292844 | 0.04978694 | 0.30946668 |
| KLK11     | 3.90791312 | -0.786536  | 0.04980087 | 0.30946668 |
| MCM3AP-AS | 86.5816529 | -0.73842   | 0.04979771 | 0.30946668 |
| PLK4      | 65.7785236 | -0.6385111 | 0.04969875 | 0.30946668 |



|          |            |            |            |            |
|----------|------------|------------|------------|------------|
| TM4SF18  | 93.3771418 | -0.7736156 | 0.04976876 | 0.30946668 |
| ZNF670   | 57.0265316 | 0.32358979 | 0.04978974 | 0.30946668 |
| C1orf198 | 1128.8129  | 0.59745659 | 0.04989361 | 0.30982148 |
| VPS53    | 1086.03002 | -0.292913  | 0.04988285 | 0.30982148 |
| APOB     | 167.620887 | 0.78448258 | 0.04993701 | 0.30986966 |
| CCDC96   | 10.0120555 | -0.6674957 | 0.04992503 | 0.30986966 |
