# Supplementary material for: Transcriptome signatures associated with meningioma progression
Source: Springer Nature journal article supplement (doi:10.1186/s40478-019-0690-x), 2019-04-30
Supplement: MOESM4 [file 25666702]

**Supplementary Table 3: Differentially expressed genes between GR I and GR III meningiomas**

| Gene      | baseMean   | log2FoldCha | pvalue   | padj     |
|-----------|------------|-------------|----------|----------|
| CERS4     | 189.750633 | 3.82520492  | 2.10E-27 | 3.61E-23 |
| AGR2      | 1047.80481 | -7.1030778  | 1.22E-23 | 1.05E-19 |
| NTRK2     | 6092.66084 | 4.34632286  | 2.09E-22 | 1.19E-18 |
| RWDD1     | 525.268835 | 1.03491578  | 5.21E-18 | 2.23E-14 |
| CENPF     | 714.663326 | -2.6977362  | 2.61E-16 | 8.94E-13 |
| MKI67     | 1127.40949 | -3.0623596  | 3.76E-16 | 1.08E-12 |
| CCDC137   | 256.66806  | -0.9360497  | 2.57E-15 | 4.91E-12 |
| MYBL2     | 102.435386 | -3.8388712  | 2.43E-15 | 4.91E-12 |
| NUF2      | 41.543764  | -2.3086201  | 2.10E-15 | 4.91E-12 |
| LINC01234 | 75.7412903 | -5.4370058  | 1.21E-14 | 2.08E-11 |
| IRAK1BP1  | 171.019234 | 2.05899909  | 3.18E-14 | 4.96E-11 |
| TUBB4A    | 23.823265  | -5.0081004  | 3.62E-14 | 5.18E-11 |
| SENP6     | 2275.60455 | 1.15983587  | 3.99E-14 | 5.27E-11 |
| KIF18B    | 103.757594 | -3.5519634  | 5.06E-14 | 5.79E-11 |
| MED23     | 1021.44067 | 0.94660556  | 4.95E-14 | 5.79E-11 |
| CACNG4    | 147.11187  | -3.8040175  | 9.38E-14 | 1.01E-10 |
| CCNC      | 479.556791 | 1.20162036  | 1.15E-13 | 1.10E-10 |
| HJURP     | 72.1588247 | -3.0512907  | 1.10E-13 | 1.10E-10 |
| E2F7      | 53.7619306 | -2.6450329  | 2.16E-13 | 1.95E-10 |
| STX7      | 2033.10931 | 0.99686031  | 3.03E-13 | 2.60E-10 |
| HECA      | 1515.01179 | 1.60687925  | 4.97E-13 | 4.06E-10 |
| LMBRD1    | 963.1915   | 1.65860921  | 5.50E-13 | 4.29E-10 |
| CDR2L     | 272.55473  | -1.8286924  | 9.66E-13 | 6.91E-10 |
| TMEFF2    | 23.3588381 | -5.046366   | 9.39E-13 | 6.91E-10 |
| RWDD2A    | 98.0920786 | 1.64381823  | 1.57E-12 | 1.08E-09 |
| SAPCD2    | 41.6178141 | -2.7394281  | 2.27E-12 | 1.50E-09 |
| PPIL4     | 624.554496 | 0.92645531  | 3.32E-12 | 2.11E-09 |
| IQSEC3    | 229.627434 | 3.67262457  | 4.64E-12 | 2.84E-09 |
| PDCD2     | 490.05953  | 1.00149268  | 1.13E-11 | 6.66E-09 |
| CIT       | 487.288493 | -2.6807335  | 1.49E-11 | 8.54E-09 |
| BUB1      | 131.950515 | -2.4822577  | 1.60E-11 | 8.88E-09 |
| PEG10     | 353.671951 | -4.3886949  | 1.71E-11 | 9.19E-09 |
| CENPA     | 19.7599718 | -3.4358046  | 1.82E-11 | 9.48E-09 |
| ATP2B2    | 114.786611 | -4.5692897  | 2.10E-11 | 1.06E-08 |
| IMMT      | 1503.02252 | -0.9532513  | 2.86E-11 | 1.40E-08 |
| TACC3     | 283.611634 | -1.834947   | 3.04E-11 | 1.45E-08 |
| BIRC5     | 119.561845 | -2.9622592  | 3.18E-11 | 1.47E-08 |
| C10orf32  | 474.112716 | 1.38677755  | 3.74E-11 | 1.69E-08 |
| SNORA54   | 99.9043822 | 4.11548288  | 5.93E-11 | 2.61E-08 |
| FAM229B   | 309.977049 | 1.81881691  | 6.41E-11 | 2.75E-08 |
| KIF14     | 114.791741 | -2.5220978  | 6.63E-11 | 2.78E-08 |
| ASPM      | 449.665452 | -2.9672818  | 7.13E-11 | 2.92E-08 |
| ARMC2     | 129.952766 | 1.96362087  | 7.34E-11 | 2.93E-08 |
| FAM111B   | 88.9714414 | -2.6535305  | 9.01E-11 | 3.48E-08 |
| HIST1H2AL | 120.292698 | -2.2821191  | 9.12E-11 | 3.48E-08 |
| CKMT1B    | 15.6458903 | -4.5303962  | 1.03E-10 | 3.76E-08 |
| OSTM1     | 824.513337 | 1.16875634  | 1.02E-10 | 3.76E-08 |

|           |            |            |          |          |
|-----------|------------|------------|----------|----------|
| HMMR      | 91.307773  | -2.6855834 | 1.53E-10 | 5.49E-08 |
| TMEM242   | 219.656883 | 1.01473736 | 2.05E-10 | 7.17E-08 |
| ESPL1     | 114.103215 | -2.420652  | 2.42E-10 | 8.32E-08 |
| CEP162    | 321.979837 | 1.42379165 | 2.47E-10 | 8.32E-08 |
| EEF1A1    | 89363.1313 | 1.17821103 | 2.61E-10 | 8.45E-08 |
| MINOS1P1  | 207.166029 | 1.61242327 | 2.61E-10 | 8.45E-08 |
| LRFN1     | 81.2631211 | -1.8778725 | 3.22E-10 | 1.02E-07 |
| SMAP1     | 573.905874 | 0.78812666 | 3.35E-10 | 1.04E-07 |
| GABRQ     | 111.976089 | -4.4980713 | 3.80E-10 | 1.16E-07 |
| IQGAP3    | 250.352714 | -2.8248868 | 4.60E-10 | 1.36E-07 |
| PRR11     | 184.488683 | -2.0964993 | 4.53E-10 | 1.36E-07 |
| TRMT11    | 320.12743  | 1.18201884 | 5.07E-10 | 1.47E-07 |
| TMEM50A   | 1042.81388 | 1.20056878 | 6.24E-10 | 1.79E-07 |
| RNF146    | 951.039511 | 1.38992901 | 6.89E-10 | 1.94E-07 |
| F5        | 248.549368 | -4.4118258 | 7.42E-10 | 2.05E-07 |
| NDUFB9    | 608.994862 | -1.2034916 | 1.29E-09 | 3.50E-07 |
| TONSL     | 158.342024 | -2.0612642 | 1.34E-09 | 3.60E-07 |
| GSG2      | 22.0888944 | -2.7635739 | 1.52E-09 | 4.01E-07 |
| SNX14     | 1049.71873 | 1.03751087 | 1.60E-09 | 4.17E-07 |
| UFL1      | 1083.60999 | 0.97030313 | 1.72E-09 | 4.42E-07 |
| DLEC1     | 129.905746 | 2.79816381 | 1.87E-09 | 4.72E-07 |
| MAP3K7    | 1195.30523 | 0.86079742 | 2.14E-09 | 5.32E-07 |
| HOXB3     | 68.4336951 | -4.1131355 | 2.34E-09 | 5.74E-07 |
| FOXO1     | 202.228809 | -2.9108887 | 2.39E-09 | 5.78E-07 |
| CHCHD10   | 166.117878 | -2.5285321 | 2.92E-09 | 6.96E-07 |
| TMEM30A   | 3358.50437 | 1.30016151 | 3.26E-09 | 7.66E-07 |
| TROAP     | 71.8199488 | -2.9113128 | 3.33E-09 | 7.72E-07 |
| CEP55     | 90.1769735 | -2.6270636 | 3.49E-09 | 7.98E-07 |
| TSPYL1    | 2564.20771 | 1.30788003 | 3.85E-09 | 8.69E-07 |
| KCNH1     | 86.6983315 | -3.8808765 | 4.33E-09 | 9.66E-07 |
| CDCA8     | 34.1756386 | -2.0902646 | 5.12E-09 | 1.13E-06 |
| HBS1L     | 873.13494  | 0.94413537 | 5.24E-09 | 1.14E-06 |
| RARS2     | 509.418643 | 0.78608016 | 5.50E-09 | 1.18E-06 |
| TOP2A     | 902.638104 | -2.4083093 | 5.92E-09 | 1.25E-06 |
| CASC1     | 35.0090539 | 2.43905227 | 6.21E-09 | 1.30E-06 |
| HOXC10    | 23.4512162 | -4.3368958 | 6.95E-09 | 1.44E-06 |
| PRKAA2    | 811.966344 | 1.62076614 | 7.28E-09 | 1.47E-06 |
| TK1       | 172.999065 | -2.8183614 | 7.20E-09 | 1.47E-06 |
| FBXL4     | 625.909964 | 1.123498   | 8.75E-09 | 1.75E-06 |
| SYNGR3    | 42.4740037 | -3.8579564 | 9.61E-09 | 1.90E-06 |
| MYLK      | 1972.61456 | 3.19820971 | 1.10E-08 | 2.12E-06 |
| PPP1R14B  | 635.51348  | -1.4777182 | 1.09E-08 | 2.12E-06 |
| PNISR     | 2988.31296 | 0.9834288  | 1.16E-08 | 2.20E-06 |
| CDC20     | 44.573848  | -2.5394847 | 1.22E-08 | 2.30E-06 |
| LINC01359 | 28.0996429 | 2.11126651 | 1.39E-08 | 2.59E-06 |
| IBTK      | 1723.7439  | 0.81588295 | 1.49E-08 | 2.75E-06 |
| MRPS5     | 604.264857 | -0.9785329 | 1.72E-08 | 3.10E-06 |
| SHOX2     | 136.01592  | -4.1206183 | 1.71E-08 | 3.10E-06 |
| POLI      | 529.02087  | 1.21476702 | 2.10E-08 | 3.72E-06 |
| SYNJ2     | 2025.17572 | 1.70160238 | 2.09E-08 | 3.72E-06 |

|           |            |            |          |          |
|-----------|------------|------------|----------|----------|
| DPP6      | 133.610762 | -3.980776  | 2.39E-08 | 4.19E-06 |
| EXO1      | 51.4603561 | -2.6820335 | 2.47E-08 | 4.28E-06 |
| THUMPD3   | 793.292772 | -0.8773761 | 2.57E-08 | 4.41E-06 |
| ATP5I     | 803.66628  | -0.949383  | 2.70E-08 | 4.53E-06 |
| CDT1      | 65.1661409 | -2.6788366 | 2.68E-08 | 4.53E-06 |
| KIF11     | 260.424961 | -2.2202487 | 2.72E-08 | 4.53E-06 |
| XKR5      | 17.8512704 | -3.246982  | 2.96E-08 | 4.88E-06 |
| COQ9      | 827.883568 | -1.4706152 | 3.06E-08 | 4.95E-06 |
| FAM57B    | 3.39488512 | -4.0498853 | 3.06E-08 | 4.95E-06 |
| GOT1      | 655.837205 | -1.6304576 | 3.09E-08 | 4.95E-06 |
| PAQR4     | 90.5834405 | -1.8004099 | 3.12E-08 | 4.96E-06 |
| STXBP5    | 715.880661 | 1.59964303 | 3.16E-08 | 4.97E-06 |
| PNRC1     | 3340.87371 | 1.43951585 | 3.26E-08 | 5.09E-06 |
| ZNF124    | 397.81158  | 1.35897298 | 3.31E-08 | 5.13E-06 |
| CDCA5     | 74.7821707 | -2.3608108 | 3.57E-08 | 5.46E-06 |
| WDR62     | 72.2141462 | -2.3029174 | 3.59E-08 | 5.46E-06 |
| UBQLN4    | 505.627989 | -0.9301327 | 3.64E-08 | 5.48E-06 |
| FSCB      | 37.2343189 | -3.790303  | 3.82E-08 | 5.70E-06 |
| GLIPR1    | 849.674851 | 0.93181839 | 4.03E-08 | 5.96E-06 |
| PEX3      | 241.821839 | 1.00227692 | 4.14E-08 | 6.07E-06 |
| COL25A1   | 40.3888042 | 2.38123502 | 4.20E-08 | 6.11E-06 |
| NDUFA8    | 367.059232 | -0.9911868 | 4.46E-08 | 6.43E-06 |
| KIF4A     | 82.976849  | -2.534331  | 4.81E-08 | 6.83E-06 |
| ZIC3      | 16.3489514 | -3.8731113 | 4.80E-08 | 6.83E-06 |
| GABRA3    | 120.466834 | -3.8168392 | 5.52E-08 | 7.76E-06 |
| UBL4B     | 116.475158 | 3.52115403 | 5.59E-08 | 7.80E-06 |
| SERINC1   | 5949.9413  | 1.14944866 | 5.64E-08 | 7.80E-06 |
| SYT10     | 5.84080507 | -3.7867546 | 5.85E-08 | 8.01E-06 |
| TRIM47    | 241.965111 | -1.8068925 | 5.88E-08 | 8.01E-06 |
| DLGAP5    | 44.6291107 | -2.3533645 | 6.66E-08 | 9.00E-06 |
| PKMYT1    | 40.3872776 | -2.5672189 | 7.31E-08 | 9.80E-06 |
| PCMT1     | 600.531562 | 1.02816571 | 7.74E-08 | 1.02E-05 |
| TECTA     | 85.1945482 | 1.12246093 | 7.69E-08 | 1.02E-05 |
| HIST1H2BO | 126.20248  | -2.2304391 | 8.61E-08 | 1.13E-05 |
| KIF20A    | 109.216911 | -2.3313709 | 9.47E-08 | 1.23E-05 |
| SV2A      | 200.504474 | -3.081204  | 9.83E-08 | 1.27E-05 |
| CLK1      | 2836.67005 | 0.97765787 | 1.01E-07 | 1.29E-05 |
| SRSF12    | 101.959565 | 1.95115424 | 1.09E-07 | 1.38E-05 |
| DLAT      | 761.106901 | -0.9043226 | 1.11E-07 | 1.40E-05 |
| KPNA5     | 310.236329 | 1.38907312 | 1.30E-07 | 1.62E-05 |
| MAP3K4    | 864.768898 | 1.31041174 | 1.37E-07 | 1.71E-05 |
| NCAM2     | 42.7464225 | -3.1020292 | 1.43E-07 | 1.74E-05 |
| NOMO2     | 353.113083 | -1.1799335 | 1.41E-07 | 1.74E-05 |
| SYF2      | 451.260599 | 0.97816243 | 1.43E-07 | 1.74E-05 |
| AURKB     | 32.5612541 | -2.3851695 | 1.50E-07 | 1.81E-05 |
| MEX3A     | 51.0328421 | -2.5068488 | 1.69E-07 | 2.02E-05 |
| FBN3      | 258.521007 | -3.5379921 | 1.72E-07 | 2.05E-05 |
| MRPL41    | 396.434536 | -1.0064159 | 1.84E-07 | 2.17E-05 |
| CKAP2L    | 74.2150284 | -2.4456053 | 1.88E-07 | 2.21E-05 |
| NEK2      | 35.5527468 | -2.404616  | 2.00E-07 | 2.34E-05 |

|             |            |            |          |          |
|-------------|------------|------------|----------|----------|
| DSE         | 2862.39982 | 1.45822681 | 2.09E-07 | 2.41E-05 |
| RRM2        | 217.035993 | -2.6770957 | 2.09E-07 | 2.41E-05 |
| ZMIZ1       | 4635.11992 | -1.207117  | 2.10E-07 | 2.41E-05 |
| ARID5B      | 1789.43922 | 2.16231502 | 2.22E-07 | 2.51E-05 |
| SPAG5       | 224.581724 | -1.8284126 | 2.23E-07 | 2.51E-05 |
| SHC1        | 3203.09103 | -0.7305704 | 2.27E-07 | 2.55E-05 |
| FAM83D      | 36.2923202 | -2.6808958 | 2.31E-07 | 2.58E-05 |
| DIAPH3      | 125.033919 | -2.0553154 | 2.48E-07 | 2.75E-05 |
| CMKLR1      | 1379.81861 | -2.6365796 | 2.64E-07 | 2.90E-05 |
| LINC00087   | 59.3621938 | 1.6989002  | 2.80E-07 | 3.06E-05 |
| C7orf13     | 72.6146521 | -2.1022016 | 2.87E-07 | 3.11E-05 |
| FAM120B     | 1242.42581 | 0.79923394 | 2.88E-07 | 3.11E-05 |
| LRFN4       | 293.638075 | -2.3071119 | 2.90E-07 | 3.11E-05 |
| SYT1        | 35.6706259 | -3.1380237 | 2.99E-07 | 3.19E-05 |
| SMOC1       | 3404.74899 | 3.21154772 | 3.02E-07 | 3.19E-05 |
| MAN1C1      | 2645.23056 | 1.39963289 | 3.12E-07 | 3.29E-05 |
| TBX20       | 7.18106339 | -3.7659902 | 3.21E-07 | 3.36E-05 |
| KCNK5       | 143.353602 | 2.55543763 | 3.58E-07 | 3.72E-05 |
| DENND5B     | 601.00255  | 1.29475829 | 3.75E-07 | 3.88E-05 |
| SPC25       | 23.8396586 | -2.8714312 | 3.82E-07 | 3.93E-05 |
| N4BP2L2-IT2 | 853.833093 | 0.9176217  | 3.95E-07 | 4.04E-05 |
| UPK3B       | 189.546719 | -3.0463521 | 4.00E-07 | 4.06E-05 |
| KPNA2       | 656.648351 | -1.5422775 | 4.17E-07 | 4.21E-05 |
| EME1        | 44.7365651 | -2.1426622 | 4.22E-07 | 4.24E-05 |
| CASC5       | 247.03552  | -2.0254371 | 4.47E-07 | 4.46E-05 |
| CXADRP2     | 17.5506404 | -3.7138487 | 4.52E-07 | 4.49E-05 |
| ALG3        | 321.798351 | -1.1720291 | 4.69E-07 | 4.63E-05 |
| NUSAP1      | 298.705166 | -2.1782406 | 4.85E-07 | 4.76E-05 |
| SGOL1       | 40.9064776 | -2.4095751 | 4.93E-07 | 4.80E-05 |
| E2F8        | 20.9454261 | -2.8663528 | 5.12E-07 | 4.96E-05 |
| HOXD13      | 12.8682832 | -3.7751459 | 5.22E-07 | 5.03E-05 |
| BUB1B       | 140.20289  | -2.3828323 | 5.29E-07 | 5.07E-05 |
| MELK        | 112.466703 | -2.6113249 | 5.61E-07 | 5.35E-05 |
| DKFZp434J02 | 15.0694913 | -3.5314399 | 5.75E-07 | 5.45E-05 |
| HIST2H3D    | 59.2919232 | -1.9794402 | 6.12E-07 | 5.77E-05 |
| CCDC28A     | 242.893215 | 1.35011479 | 6.46E-07 | 6.06E-05 |
| UST         | 968.089564 | 1.78410291 | 6.68E-07 | 6.23E-05 |
| TRIM37      | 1092.7114  | -0.9253673 | 6.82E-07 | 6.32E-05 |
| ARHGEF39    | 54.7582187 | -2.4624286 | 6.97E-07 | 6.37E-05 |
| OGFRL1      | 1498.99694 | 1.42678533 | 7.01E-07 | 6.37E-05 |
| SF3B5       | 466.577844 | 0.86716837 | 7.01E-07 | 6.37E-05 |
| WHSC1       | 1694.57389 | -1.1476005 | 6.93E-07 | 6.37E-05 |
| PCGF2       | 626.940149 | -1.0135808 | 7.35E-07 | 6.60E-05 |
| TULP4       | 1560.53747 | 0.64693533 | 7.34E-07 | 6.60E-05 |
| KCNMA1      | 15014.0204 | 3.09717854 | 7.50E-07 | 6.71E-05 |
| SRCIN1      | 61.5705554 | -2.3679635 | 7.62E-07 | 6.78E-05 |
| GUSBP4      | 55.9270719 | 1.45150422 | 7.74E-07 | 6.81E-05 |
| RHBG        | 13.006298  | -3.7072445 | 7.73E-07 | 6.81E-05 |
| SAYSD1      | 160.179653 | 1.30782265 | 7.82E-07 | 6.85E-05 |
| C19orf54    | 166.11146  | -1.2555705 | 7.91E-07 | 6.89E-05 |

|            |            |            |          |            |
|------------|------------|------------|----------|------------|
| DDX60      | 940.119993 | 1.1440712  | 9.19E-07 | 7.93E-05   |
| DOPEY1     | 1232.26857 | 1.34239806 | 9.17E-07 | 7.93E-05   |
| PEX7       | 85.5184372 | 1.4101819  | 9.33E-07 | 8.01E-05   |
| COG8       | 430.895931 | -0.7068139 | 9.41E-07 | 8.04E-05   |
| SIDT1      | 139.704396 | -2.5636287 | 9.53E-07 | 8.10E-05   |
| MRPL12     | 337.812754 | -1.7881733 | 9.77E-07 | 8.26E-05   |
| IGF2BP1    | 231.64847  | -3.6818096 | 1.07E-06 | 8.99E-05   |
| LATS1      | 1542.64653 | 0.8732865  | 1.08E-06 | 9.04E-05   |
| RECQL4     | 108.950376 | -2.0126349 | 1.09E-06 | 9.07E-05   |
| SLC31A2    | 368.157749 | 1.70963175 | 1.13E-06 | 9.39E-05   |
| NCAPH      | 67.7986317 | -2.1640402 | 1.22E-06 | 0.00010053 |
| ELF3       | 218.822004 | -3.3871162 | 1.26E-06 | 0.00010312 |
| CYB5R4     | 201.466521 | 1.12284394 | 1.30E-06 | 0.00010659 |
| FASN       | 3312.88578 | -1.6861714 | 1.36E-06 | 0.00011067 |
| MUC15      | 40.9082842 | -3.6405306 | 1.40E-06 | 0.00011256 |
| RPS13      | 2999.5097  | 0.64873646 | 1.40E-06 | 0.00011256 |
| ZNF292     | 2247.5179  | 0.74403458 | 1.40E-06 | 0.00011256 |
| WTAP       | 1186.35796 | 0.90318237 | 1.43E-06 | 0.0001139  |
| GPX3       | 1033.51045 | 2.62874958 | 1.46E-06 | 0.00011483 |
| GTF2H5     | 373.740459 | 1.13843488 | 1.45E-06 | 0.00011483 |
| IFIT3      | 650.176732 | 0.89833254 | 1.47E-06 | 0.00011483 |
| RPS18P9    | 68.5748586 | 1.57875738 | 1.46E-06 | 0.00011483 |
| HRCT1      | 92.0000258 | -2.0806229 | 1.54E-06 | 0.00011924 |
| HSF2       | 304.913977 | 1.16485131 | 1.54E-06 | 0.00011924 |
| ARMCX1     | 514.528882 | 0.65976058 | 1.55E-06 | 0.00011982 |
| BMPR1B     | 3902.22607 | 2.69579407 | 1.59E-06 | 0.00012128 |
| UBE2T      | 69.1767508 | -1.923823  | 1.59E-06 | 0.00012128 |
| USP45      | 321.415377 | 1.0217161  | 1.59E-06 | 0.00012128 |
| ATP8B3     | 177.059151 | -2.2059594 | 1.62E-06 | 0.00012336 |
| SESN1      | 2046.58208 | 1.87055264 | 1.70E-06 | 0.00012824 |
| CPO        | 11.4286543 | 2.80120058 | 1.74E-06 | 0.00013089 |
| HACE1      | 337.322223 | 1.23345601 | 1.77E-06 | 0.00013225 |
| LOC1005066 | 45.340747  | 1.62257354 | 1.77E-06 | 0.00013225 |
| PRAC2      | 4.75975228 | -3.5927256 | 1.81E-06 | 0.00013451 |
| TRAP1      | 1033.62389 | -1.1326422 | 1.82E-06 | 0.00013452 |
| CKS2       | 92.6602683 | -1.9800654 | 1.85E-06 | 0.00013623 |
| CDKN3      | 34.8028122 | -2.1318236 | 1.93E-06 | 0.00014161 |
| GINM1      | 649.942712 | 0.75587965 | 1.94E-06 | 0.00014202 |
| LOC1002890 | 208.493174 | -1.8477811 | 2.03E-06 | 0.00014764 |
| CD164      | 4757.87276 | 0.95740065 | 2.06E-06 | 0.00014895 |
| EZH1       | 1237.76466 | 1.02049272 | 2.11E-06 | 0.00015132 |
| RHOD       | 292.059907 | -1.1563768 | 2.10E-06 | 0.00015132 |
| MMP15      | 659.516792 | -2.7765751 | 2.16E-06 | 0.00015439 |
| OTX1       | 6.95966886 | -3.1296096 | 2.19E-06 | 0.00015588 |
| FIG4       | 320.469056 | 1.11772505 | 2.21E-06 | 0.00015678 |
| DPH6-AS1   | 22.5921435 | 2.14756982 | 2.33E-06 | 0.00016362 |
| TYRP1      | 6.32465598 | -3.5205894 | 2.32E-06 | 0.00016362 |
| HAND2      | 13.147496  | -3.5602485 | 2.37E-06 | 0.00016619 |
| MORN2      | 103.625866 | 1.30844082 | 2.49E-06 | 0.00017361 |
| GIT1       | 1478.98271 | -1.1883845 | 2.50E-06 | 0.00017385 |

|            |            |            |          |            |
|------------|------------|------------|----------|------------|
| NUP210     | 1016.78538 | -1.549609  | 2.55E-06 | 0.00017385 |
| PDE1C      | 193.370745 | 3.12860655 | 2.54E-06 | 0.00017385 |
| PDLIM5     | 3899.07628 | 1.26019789 | 2.55E-06 | 0.00017385 |
| PHLDB1     | 3073.50344 | -0.8109664 | 2.53E-06 | 0.00017385 |
| RNF11      | 1993.70043 | 1.1625444  | 2.55E-06 | 0.00017385 |
| BZW2       | 246.811942 | -1.0824528 | 2.57E-06 | 0.00017457 |
| GPC3       | 284.049285 | -3.0820848 | 2.59E-06 | 0.00017515 |
| CPQ        | 1836.40044 | 1.21075513 | 2.66E-06 | 0.00017912 |
| CACNB1     | 176.123656 | -1.469067  | 2.68E-06 | 0.0001794  |
| PSAT1      | 303.119766 | -2.0785142 | 2.69E-06 | 0.00017964 |
| RSRP1      | 841.707998 | 1.36554089 | 2.76E-06 | 0.00018367 |
| LRRC20     | 212.866114 | -1.4888188 | 2.78E-06 | 0.00018423 |
| ZNF676     | 157.230263 | 3.33125122 | 2.81E-06 | 0.00018539 |
| ATP5B      | 6873.97422 | -0.9266386 | 2.94E-06 | 0.00019344 |
| ADCY5      | 3813.43826 | -1.4091768 | 2.97E-06 | 0.00019426 |
| MTNR1A     | 9.6365119  | -3.4038739 | 3.04E-06 | 0.0001983  |
| LOC729603  | 194.967892 | 1.68542351 | 3.12E-06 | 0.00020262 |
| CPE        | 13020.586  | 3.14882534 | 3.18E-06 | 0.00020627 |
| CCDC62     | 10.8197653 | 2.26256578 | 3.41E-06 | 0.00021979 |
| DTL        | 169.202332 | -2.2644001 | 3.50E-06 | 0.00022482 |
| HOXB4      | 24.3954249 | -3.1470726 | 3.58E-06 | 0.00022956 |
| MAG        | 23.1706354 | -3.4365661 | 3.62E-06 | 0.00023087 |
| WDR96      | 35.8050312 | 2.52918824 | 3.67E-06 | 0.00023321 |
| MTRNR2L9   | 60.2387764 | 1.84483019 | 3.80E-06 | 0.00024038 |
| HIST1H2AI  | 142.773791 | -2.0307412 | 3.86E-06 | 0.00024381 |
| CCNA2      | 103.991996 | -1.8858171 | 3.91E-06 | 0.0002456  |
| DCPS       | 166.54925  | -0.7676433 | 3.92E-06 | 0.0002456  |
| SLC25A5    | 1890.76588 | -1.0363742 | 4.03E-06 | 0.00025173 |
| E2F2       | 33.2583075 | -1.9578989 | 4.31E-06 | 0.0002681  |
| HCFC1R1    | 785.10632  | -1.1530419 | 4.38E-06 | 0.00027116 |
| LETM1      | 1216.06092 | -0.7262154 | 4.40E-06 | 0.00027198 |
| CTGF       | 16772.0814 | 2.63587531 | 4.44E-06 | 0.00027337 |
| MSANTD4    | 553.30069  | -0.779774  | 4.55E-06 | 0.00027918 |
| AIG1       | 542.882633 | 1.13713222 | 4.60E-06 | 0.00028103 |
| LOC1001305 | 22.3392687 | -3.2959837 | 4.65E-06 | 0.00028297 |
| RGS9BP     | 8.0100499  | -2.7879327 | 4.67E-06 | 0.00028315 |
| CREBL2     | 1380.98212 | 1.02451338 | 4.72E-06 | 0.00028516 |
| POLR3K     | 108.155596 | -1.0835682 | 4.86E-06 | 0.00029257 |
| CDCA7      | 86.2404134 | -2.8756172 | 4.91E-06 | 0.00029277 |
| NCBP2-AS2  | 158.504754 | -0.7892614 | 4.90E-06 | 0.00029277 |
| OLIG1      | 9.35801703 | -3.1913325 | 4.90E-06 | 0.00029277 |
| ZUFSP      | 147.308907 | 0.88104873 | 4.95E-06 | 0.00029376 |
| CHCHD3     | 674.561202 | -0.796445  | 4.98E-06 | 0.00029378 |
| TEX14      | 49.3032691 | -2.9735908 | 4.97E-06 | 0.00029378 |
| HIST1H3B   | 311.842893 | -2.1076488 | 5.12E-06 | 0.00030115 |
| KIAA0101   | 71.2455429 | -2.5211944 | 5.28E-06 | 0.00030955 |
| H2AFX      | 355.751863 | -1.6668248 | 5.43E-06 | 0.00031712 |
| REV3L      | 1794.60545 | 0.96376713 | 5.53E-06 | 0.00032151 |
| PDHA1      | 974.865193 | -0.9221397 | 5.65E-06 | 0.00032653 |
| SLC6A17    | 45.7597071 | 3.06501388 | 5.65E-06 | 0.00032653 |

|           |            |            |          |            |
|-----------|------------|------------|----------|------------|
| AR        | 1106.58485 | 3.10747518 | 5.80E-06 | 0.00033417 |
| DHRS2     | 187.740547 | -3.090836  | 5.88E-06 | 0.0003378  |
| COL20A1   | 6.13872003 | -3.3230554 | 5.95E-06 | 0.00033816 |
| GVINP1    | 201.483536 | 1.54424025 | 5.95E-06 | 0.00033816 |
| PDPK1     | 1476.20875 | -0.5173099 | 5.95E-06 | 0.00033816 |
| CCNB3     | 12.4387654 | -1.8574961 | 5.98E-06 | 0.0003389  |
| EPG5      | 2043.04764 | 1.20502699 | 6.15E-06 | 0.0003471  |
| LMNB1     | 242.135009 | -1.6055719 | 6.18E-06 | 0.00034807 |
| GTF2E1    | 224.362145 | -0.6738294 | 6.29E-06 | 0.00035263 |
| PGP       | 351.04566  | -0.7723226 | 6.55E-06 | 0.00036642 |
| BCAR3     | 401.105924 | 2.60460343 | 6.97E-06 | 0.00038711 |
| ESRRG     | 13.6583075 | -2.8620839 | 6.97E-06 | 0.00038711 |
| PDSS2     | 325.406244 | 0.95029141 | 7.03E-06 | 0.00038927 |
| CDK15     | 10.0351473 | 2.51851191 | 7.30E-06 | 0.00040287 |
| CGN       | 33.3921441 | -2.1660079 | 7.41E-06 | 0.00040754 |
| CRAT      | 861.166467 | -0.7910012 | 7.50E-06 | 0.00041141 |
| MANEA     | 506.14749  | 1.48727277 | 7.64E-06 | 0.00041741 |
| ASIP      | 11.4341827 | 3.26366927 | 7.76E-06 | 0.00042148 |
| CHRM1     | 113.222887 | -3.2345914 | 7.76E-06 | 0.00042148 |
| DLL1      | 121.633819 | 2.68210564 | 7.85E-06 | 0.0004249  |
| PRRC2C    | 7025.77414 | -0.6559472 | 7.98E-06 | 0.00043061 |
| FAM189B   | 484.130739 | -1.5377963 | 8.20E-06 | 0.00043904 |
| HIST1H2AJ | 101.506483 | -2.1617782 | 8.21E-06 | 0.00043904 |
| IL33      | 70.203025  | 2.62250106 | 8.19E-06 | 0.00043904 |
| MATK      | 63.5777062 | -2.4538325 | 8.38E-06 | 0.00044653 |
| ALAS2     | 13.5767688 | 2.7860484  | 8.47E-06 | 0.00045003 |
| UBE2C     | 104.118917 | -2.5357729 | 8.63E-06 | 0.00045719 |
| C16orf59  | 20.2374665 | -2.2973256 | 8.71E-06 | 0.00046009 |
| APOL1     | 751.789721 | 1.48706428 | 8.82E-06 | 0.00046462 |
| LRPPRC    | 2895.99261 | -0.7494965 | 8.95E-06 | 0.00046995 |
| SNX9      | 1245.64034 | 0.89452774 | 8.98E-06 | 0.00046995 |
| ADAMTS8   | 19.9188237 | -3.203176  | 9.24E-06 | 0.00048192 |
| CHEK1     | 110.153241 | -1.6029651 | 9.45E-06 | 0.00049148 |
| SDCCAG3   | 406.040437 | -0.7409432 | 9.62E-06 | 0.00049901 |
| CYP2G1P   | 7.16891677 | 2.59112549 | 9.71E-06 | 0.00050178 |
| AHCYL2    | 7694.72543 | 1.30660841 | 9.82E-06 | 0.00050618 |
| POLQ      | 99.7733178 | -2.1154062 | 9.97E-06 | 0.00051254 |
| PQLC3     | 423.913135 | 0.95548875 | 1.02E-05 | 0.00052038 |
| CDCA3     | 34.7083687 | -1.9643426 | 1.11E-05 | 0.00056783 |
| GDA       | 23.9999149 | -3.0768595 | 1.11E-05 | 0.00056783 |
| SRL       | 35.2209087 | 2.9227017  | 1.12E-05 | 0.0005706  |
| EIF4EBP1  | 224.138678 | -1.3301138 | 1.13E-05 | 0.0005714  |
| LY6H      | 16.6810797 | -2.8482722 | 1.17E-05 | 0.00059105 |
| NPLOC4    | 1816.43533 | -0.745685  | 1.17E-05 | 0.00059105 |
| OAZ1      | 3442.91957 | 0.66645915 | 1.19E-05 | 0.00059891 |
| SCAF8     | 1929.21957 | 0.5795074  | 1.21E-05 | 0.00060398 |
| CRMP1     | 447.584463 | -2.3791852 | 1.22E-05 | 0.00060806 |
| SYNPO2    | 2996.14692 | 2.50015839 | 1.23E-05 | 0.00061126 |
| INCENP    | 304.487873 | -0.7607108 | 1.26E-05 | 0.00062455 |
| CYR61     | 1431.06778 | 1.96888846 | 1.27E-05 | 0.00063004 |

|            |            |            |          |            |
|------------|------------|------------|----------|------------|
| LOC1019276 | 13.5648244 | -3.0476393 | 1.32E-05 | 0.00064939 |
| FOXK2      | 979.870481 | -0.8644701 | 1.33E-05 | 0.00065212 |
| LOC90784   | 341.606191 | -0.9712168 | 1.33E-05 | 0.00065212 |
| COX8A      | 1239.57547 | -0.6852824 | 1.37E-05 | 0.00066762 |
| HIST1H1B   | 457.697536 | -1.777744  | 1.37E-05 | 0.00066762 |
| TICRR      | 84.9926078 | -2.5934655 | 1.37E-05 | 0.00066762 |
| LOC1005073 | 214.578961 | -2.6619119 | 1.39E-05 | 0.00067407 |
| MAP7       | 200.469916 | 1.88400214 | 1.40E-05 | 0.00067548 |
| GOT2       | 1220.95143 | -0.8612187 | 1.41E-05 | 0.00068064 |
| RGL1       | 1700.02139 | 1.69521101 | 1.43E-05 | 0.000688   |
| DARS2      | 437.030174 | -1.0971507 | 1.45E-05 | 0.00069594 |
| ADCY10P1   | 104.099812 | 2.38791264 | 1.46E-05 | 0.00069637 |
| FAM69B     | 325.351957 | -1.0249865 | 1.50E-05 | 0.00071135 |
| LCA5       | 130.012521 | 1.61286941 | 1.50E-05 | 0.00071135 |
| TAF1A-AS1  | 18.301868  | -1.6645139 | 1.50E-05 | 0.00071135 |
| ZNF99      | 78.8006945 | 2.92572968 | 1.50E-05 | 0.00071135 |
| ADAM20     | 118.677473 | 1.09904336 | 1.57E-05 | 0.00074006 |
| FILIP1     | 160.414314 | 2.35938347 | 1.58E-05 | 0.0007451  |
| ZWINT      | 119.326931 | -1.8242616 | 1.59E-05 | 0.00074545 |
| HIST1H2BL  | 100.253881 | -1.6521021 | 1.60E-05 | 0.00074683 |
| NCAPG      | 144.15022  | -2.115952  | 1.60E-05 | 0.00074683 |
| DVL3       | 1694.75406 | -0.6859586 | 1.63E-05 | 0.00075971 |
| LINC00858  | 7.05622068 | -3.2433372 | 1.73E-05 | 0.00079901 |
| MYLK4      | 533.863279 | 2.75172964 | 1.73E-05 | 0.00079901 |
| LPCAT4     | 194.575983 | -1.4893779 | 1.79E-05 | 0.00082499 |
| PHGDH      | 477.027866 | -2.5225292 | 1.81E-05 | 0.00083306 |
| FOXO3      | 3020.39724 | 1.60161576 | 1.82E-05 | 0.00083587 |
| EPM2A      | 133.929413 | 1.04187552 | 1.87E-05 | 0.00085166 |
| FOXC2      | 1002.97953 | -1.7341882 | 1.86E-05 | 0.00085166 |
| PARK2      | 108.596854 | 1.53861881 | 1.87E-05 | 0.00085267 |
| RNGTT      | 496.71505  | 1.02728337 | 1.88E-05 | 0.00085408 |
| TIGD5      | 124.480378 | -0.9612661 | 1.89E-05 | 0.00085408 |
| DNAH12     | 64.806084  | 2.49831565 | 1.93E-05 | 0.00087197 |
| ZFYVE9     | 1317.75229 | 1.07302254 | 1.94E-05 | 0.00087384 |
| ACACB      | 1254.78765 | -0.8444689 | 2.00E-05 | 0.00089651 |
| OAS2       | 348.1129   | 0.99955702 | 2.00E-05 | 0.00089651 |
| RHOBTB3    | 1237.32268 | 2.62526322 | 2.01E-05 | 0.00089651 |
| PSKH1      | 824.397151 | -0.8603921 | 2.04E-05 | 0.00090874 |
| ANLN       | 300.15081  | -2.0464932 | 2.08E-05 | 0.00092476 |
| ZNF214     | 73.5851041 | 1.88845473 | 2.08E-05 | 0.00092476 |
| MCM10      | 47.5591747 | -2.3142874 | 2.10E-05 | 0.00092692 |
| FANCC      | 308.14393  | -1.3199883 | 2.13E-05 | 0.00093787 |
| TMEM181    | 864.523989 | 0.88757839 | 2.14E-05 | 0.00094295 |
| CDC6       | 106.441338 | -1.8494201 | 2.16E-05 | 0.00094551 |
| PM20D1     | 10.5748545 | 2.8592376  | 2.16E-05 | 0.00094551 |
| ZNF136     | 375.574507 | 1.04820284 | 2.15E-05 | 0.00094551 |
| CCNF       | 106.408207 | -1.7517829 | 2.20E-05 | 0.00095787 |
| BLM        | 74.4257353 | -2.0574241 | 2.22E-05 | 0.00095904 |
| LINC00271  | 6.46810286 | 2.98145265 | 2.22E-05 | 0.00095904 |
| R3HDM1     | 659.467861 | -0.6949552 | 2.21E-05 | 0.00095904 |

|            |            |            |          |            |
|------------|------------|------------|----------|------------|
| CXXM2      | 2020.51216 | 2.73491811 | 2.25E-05 | 0.0009688  |
| LRCH1      | 724.257118 | 1.84201167 | 2.26E-05 | 0.00097044 |
| LOC1002881 | 35.2557841 | -2.771954  | 2.27E-05 | 0.00097209 |
| PPIL6      | 31.2187078 | 2.14942118 | 2.27E-05 | 0.00097341 |
| PM20D2     | 380.474503 | 1.57587537 | 2.29E-05 | 0.00097647 |
| ARRDC1     | 339.99334  | -0.7200804 | 2.31E-05 | 0.00098405 |
| TIAM2      | 37.9355733 | 2.04656026 | 2.32E-05 | 0.00098424 |
| INTU       | 401.456976 | 1.37403505 | 2.33E-05 | 0.00098556 |
| HMBS       | 157.98461  | -1.4808698 | 2.33E-05 | 0.00098633 |
| RPS16P5    | 172.144782 | 1.47395843 | 2.36E-05 | 0.00099619 |
| ARHGFE3    | 1065.43332 | 1.88962003 | 2.39E-05 | 0.00099998 |
| FANCA      | 162.750654 | -1.8305793 | 2.39E-05 | 0.00099998 |
| MRPS34     | 423.988861 | -0.7786843 | 2.39E-05 | 0.00099998 |
| ORC3       | 539.902136 | 0.63566001 | 2.39E-05 | 0.00099998 |
| CENPQ      | 91.2372306 | 0.90606443 | 2.42E-05 | 0.00100935 |
| FABP7      | 4.34177352 | -3.1147125 | 2.43E-05 | 0.00101181 |
| MYPOP      | 66.6268479 | -1.0326046 | 2.45E-05 | 0.0010174  |
| PLD3       | 6535.51423 | 1.35159055 | 2.47E-05 | 0.00102215 |
| DCTPP1     | 217.247848 | -0.9253946 | 2.48E-05 | 0.00102305 |
| RAB3A      | 51.7026733 | -1.3824253 | 2.49E-05 | 0.00102305 |
| RGS2       | 527.56758  | 1.97215115 | 2.49E-05 | 0.00102397 |
| ASF1B      | 63.4340203 | -1.7656742 | 2.51E-05 | 0.00102733 |
| ADPRM      | 84.797888  | 1.19694101 | 2.52E-05 | 0.00102915 |
| LOC1009965 | 12.0025991 | -3.1344714 | 2.54E-05 | 0.00103427 |
| LLGL2      | 432.374843 | -1.9690518 | 2.66E-05 | 0.0010806  |
| GPSM3      | 4.85810158 | -3.1119083 | 2.67E-05 | 0.00108172 |
| TPCN2      | 422.544664 | -0.8625859 | 2.71E-05 | 0.00109791 |
| ESCO2      | 37.6594801 | -1.8303369 | 2.73E-05 | 0.00110418 |
| COX7B      | 981.520009 | -1.0857837 | 2.80E-05 | 0.00112044 |
| MN1        | 1614.00488 | 1.79551486 | 2.80E-05 | 0.00112044 |
| PRRX1      | 3056.59019 | 2.50827007 | 2.79E-05 | 0.00112044 |
| UNC13A     | 578.676722 | -2.6590537 | 2.80E-05 | 0.00112044 |
| ESRRA      | 431.007054 | -1.0450882 | 2.87E-05 | 0.00114259 |
| TRIM46     | 85.602036  | -2.4178418 | 2.87E-05 | 0.00114259 |
| FRAT1      | 147.508673 | 1.70734265 | 2.89E-05 | 0.00114899 |
| CXorf22    | 33.0657129 | -2.9705374 | 2.94E-05 | 0.00116111 |
| SNAP23     | 1007.97928 | 0.57496786 | 2.93E-05 | 0.00116111 |
| FAM135A    | 639.913018 | 0.96814144 | 2.96E-05 | 0.00116687 |
| NCAN       | 20.7571318 | -3.0671839 | 2.98E-05 | 0.00117389 |
| TBC1D32    | 363.429979 | 1.2383956  | 3.00E-05 | 0.00117646 |
| TCEAL2     | 90.4612237 | 2.85929252 | 3.03E-05 | 0.00118908 |
| SMAD4      | 2526.59397 | 0.8137513  | 3.07E-05 | 0.00119948 |
| SEPT5      | 12.3980255 | -1.9701256 | 3.10E-05 | 0.00120817 |
| RMI1       | 118.182424 | -1.0254222 | 3.23E-05 | 0.00125805 |
| OLFM1      | 186.833758 | -2.3742273 | 3.27E-05 | 0.00127094 |
| DCX        | 47.5716476 | -2.8981894 | 3.30E-05 | 0.00127816 |
| CAMSAP1    | 1095.01468 | -0.616789  | 3.31E-05 | 0.00128049 |
| LOC1005056 | 10.6383038 | -1.8162965 | 3.33E-05 | 0.00128468 |
| RSPH3      | 229.275561 | 0.7484524  | 3.41E-05 | 0.00131116 |
| TEKT3      | 14.8264595 | 2.38865585 | 3.41E-05 | 0.00131116 |

|            |            |            |          |            |
|------------|------------|------------|----------|------------|
| MTO1       | 352.282619 | 0.79764995 | 3.45E-05 | 0.00132094 |
| TMC6       | 918.146787 | -1.3272139 | 3.46E-05 | 0.00132094 |
| CLK4       | 530.763903 | 1.0127948  | 3.48E-05 | 0.00132931 |
| EBP        | 224.792986 | -1.2237917 | 3.50E-05 | 0.00133273 |
| CDK1       | 153.144048 | -1.9620813 | 3.56E-05 | 0.00135042 |
| KIAA1919   | 442.62422  | 0.95328511 | 3.58E-05 | 0.00135343 |
| NDUFS1     | 1828.65311 | -0.7006914 | 3.58E-05 | 0.00135343 |
| HUNK       | 65.8482424 | -2.0799651 | 3.62E-05 | 0.0013659  |
| STL        | 48.9626979 | 1.57368863 | 3.74E-05 | 0.00140595 |
| LHX2       | 10.782016  | -3.008705  | 3.76E-05 | 0.0014141  |
| DDX26B     | 423.4942   | 1.42629718 | 3.81E-05 | 0.00142955 |
| MAP3K5     | 869.149961 | 1.7070595  | 3.83E-05 | 0.00143102 |
| ISL2       | 9.01970494 | -3.0926222 | 3.90E-05 | 0.00145241 |
| LRRC58     | 1841.52787 | -0.5371554 | 3.90E-05 | 0.00145241 |
| SQLE       | 611.483362 | -1.8119246 | 3.93E-05 | 0.00145981 |
| ACSL5      | 295.415922 | 1.55494832 | 3.94E-05 | 0.00146053 |
| FST        | 54.5418543 | 2.86839402 | 4.01E-05 | 0.00148194 |
| KIF13B     | 938.948019 | 1.15184502 | 4.05E-05 | 0.00149556 |
| ANO6       | 6760.96571 | 0.96587104 | 4.12E-05 | 0.00151633 |
| TERC       | 797.383563 | -1.4043536 | 4.13E-05 | 0.00151861 |
| NPIP3      | 356.448919 | -1.4835018 | 4.17E-05 | 0.0015278  |
| ASF1A      | 313.925085 | 0.89800273 | 4.20E-05 | 0.00153527 |
| NOB1       | 535.664427 | -0.904292  | 4.20E-05 | 0.00153527 |
| CNOT6L     | 1224.10583 | 0.67219862 | 4.28E-05 | 0.0015512  |
| LYST       | 2011.07914 | 1.11055987 | 4.27E-05 | 0.0015512  |
| NELL2      | 65.1681531 | -2.1766015 | 4.26E-05 | 0.0015512  |
| TSIX       | 25.197287  | 2.7055309  | 4.28E-05 | 0.0015512  |
| ALDH3A2    | 4080.80388 | 1.6245864  | 4.31E-05 | 0.00155512 |
| CENPU      | 102.956962 | -1.7323383 | 4.32E-05 | 0.00155512 |
| PSMG2      | 493.222189 | 0.78093027 | 4.31E-05 | 0.00155512 |
| IFIT2      | 430.17998  | 1.05287935 | 4.37E-05 | 0.00157035 |
| CAMTA1     | 368.046412 | 1.08748127 | 4.45E-05 | 0.00159451 |
| LOC145474  | 137.476354 | 1.64852921 | 4.46E-05 | 0.00159571 |
| L3MBTL1    | 304.41966  | 1.04517634 | 4.53E-05 | 0.00161688 |
| CCL26      | 115.087392 | 1.94555587 | 4.58E-05 | 0.00163046 |
| LBX1       | 2.96910094 | -3.0755482 | 4.59E-05 | 0.00163046 |
| CTSC       | 1993.99921 | -1.8738567 | 4.68E-05 | 0.00165932 |
| TEAD2      | 358.937121 | -1.3577703 | 4.84E-05 | 0.00171302 |
| EZH2       | 195.63929  | -1.504868  | 4.86E-05 | 0.00171478 |
| MORN1      | 69.5911079 | 1.34785303 | 4.89E-05 | 0.00172325 |
| ZNF777     | 273.773685 | -0.7430855 | 4.90E-05 | 0.00172485 |
| LINC00630  | 123.174527 | 0.65815035 | 4.94E-05 | 0.00173558 |
| MRPL18     | 341.708565 | 0.75114873 | 4.96E-05 | 0.00173692 |
| BOLA3      | 103.51029  | -1.0505564 | 5.01E-05 | 0.0017516  |
| C9orf172   | 16.0726124 | -2.4576165 | 5.05E-05 | 0.00175463 |
| COX5A      | 643.766982 | -1.5607778 | 5.04E-05 | 0.00175463 |
| LOC1005075 | 104.422068 | 1.86075064 | 5.06E-05 | 0.00175463 |
| XAB2       | 654.597657 | 0.58242336 | 5.04E-05 | 0.00175463 |
| DNM1       | 84.5012565 | -1.6228364 | 5.11E-05 | 0.00176785 |
| ACLY       | 2798.0069  | -0.7162406 | 5.14E-05 | 0.00177566 |

|            |            |            |          |            |
|------------|------------|------------|----------|------------|
| CYC1       | 742.702446 | -0.9145154 | 5.21E-05 | 0.00179287 |
| THAP8      | 52.8262099 | -1.2521619 | 5.21E-05 | 0.00179287 |
| SOX9       | 150.447586 | -2.8958472 | 5.32E-05 | 0.00182535 |
| CTDSP1     | 2597.39607 | -0.3669105 | 5.44E-05 | 0.00186401 |
| CDH6       | 343.727496 | 2.32776878 | 5.47E-05 | 0.00186744 |
| PRMT9      | 380.541758 | 1.07699715 | 5.46E-05 | 0.00186744 |
| REPS1      | 686.247849 | 0.90285413 | 5.49E-05 | 0.00186923 |
| PPP2R3C    | 217.44895  | 0.94103282 | 5.57E-05 | 0.00189104 |
| WNT9A      | 143.088226 | -1.2963317 | 5.57E-05 | 0.00189104 |
| AUNIP      | 6.12551054 | -2.0723158 | 5.72E-05 | 0.00193244 |
| RAB23      | 1004.48589 | 1.45922249 | 5.72E-05 | 0.00193244 |
| SLC31A1    | 813.319715 | -0.8267849 | 5.75E-05 | 0.00194033 |
| OPA1       | 1763.08803 | -0.3522978 | 5.78E-05 | 0.00194097 |
| RAP1GAP2   | 511.234059 | -1.6677629 | 5.77E-05 | 0.00194097 |
| KATNA1     | 165.076917 | 0.79991619 | 5.85E-05 | 0.001961   |
| B9D2       | 34.9184025 | 1.43919362 | 5.98E-05 | 0.00199465 |
| GATA3      | 16.1290326 | -2.2381928 | 5.96E-05 | 0.00199465 |
| LOC1019277 | 28.7519384 | -3.0271534 | 5.99E-05 | 0.00199465 |
| MRPL38     | 468.268488 | -0.672859  | 6.01E-05 | 0.00199465 |
| THAP4      | 584.01637  | -0.8231227 | 6.00E-05 | 0.00199465 |
| ERMARD     | 293.83184  | 0.84033897 | 6.07E-05 | 0.00201168 |
| ITIH2      | 2115.32064 | 2.62648354 | 6.08E-05 | 0.00201236 |
| TNFSF4     | 63.6216652 | 1.80300737 | 6.23E-05 | 0.00205551 |
| KLHL41     | 25.3285332 | 1.78578388 | 6.25E-05 | 0.00205818 |
| APOL6      | 1071.24896 | 0.91316967 | 6.54E-05 | 0.00215189 |
| DHCR7      | 536.223012 | -1.6560317 | 6.62E-05 | 0.00217143 |
| FRRS1L     | 51.1771502 | 2.71728022 | 6.65E-05 | 0.0021774  |
| RNF217     | 731.17544  | 0.92137958 | 6.66E-05 | 0.00217804 |
| ZNF285     | 99.8641501 | 1.11782438 | 6.69E-05 | 0.0021837  |
| CCDC106    | 248.70774  | -0.939799  | 6.73E-05 | 0.00218845 |
| RRP7B      | 146.409736 | 1.04286337 | 6.73E-05 | 0.00218845 |
| MDH2       | 1634.51204 | -0.9231303 | 6.75E-05 | 0.00218921 |
| NUP43      | 829.364562 | 0.70612278 | 6.80E-05 | 0.00220324 |
| GAS7       | 1129.53846 | -1.6802774 | 6.83E-05 | 0.00220946 |
| GALR1      | 10.8997174 | -2.9954237 | 6.86E-05 | 0.00221083 |
| HCN2       | 55.0892803 | -2.0124318 | 6.88E-05 | 0.00221083 |
| LOC1005061 | 12.1621182 | 2.41892826 | 6.89E-05 | 0.00221083 |
| NKX6-1     | 21.9903555 | -2.7142192 | 6.90E-05 | 0.00221083 |
| TMEM223    | 142.583002 | -0.8190842 | 6.90E-05 | 0.00221083 |
| MPPE1      | 463.505729 | 0.7720622  | 6.96E-05 | 0.00222379 |
| CKS1B      | 116.256286 | -1.2646658 | 6.99E-05 | 0.00222895 |
| PCSK1N     | 351.45395  | -2.1413328 | 7.00E-05 | 0.00222928 |
| ENO4       | 17.4809736 | 2.00727376 | 7.05E-05 | 0.0022413  |
| HIST1H2BK  | 805.92466  | -0.7523827 | 7.09E-05 | 0.00224826 |
| ZMYND19    | 170.795132 | -0.9151931 | 7.10E-05 | 0.00224826 |
| URB2       | 413.649764 | -0.794511  | 7.17E-05 | 0.00226498 |
| TDRKH      | 152.098109 | -1.2795479 | 7.37E-05 | 0.00232477 |
| KLHL31     | 35.9349537 | 1.88090853 | 7.41E-05 | 0.00232971 |
| POTEC      | 4.65710768 | -2.9819395 | 7.40E-05 | 0.00232971 |
| AFMID      | 288.580292 | -1.1651723 | 7.46E-05 | 0.00234165 |

|            |            |            |          |            |
|------------|------------|------------|----------|------------|
| SERAC1     | 237.759241 | 1.34781828 | 7.50E-05 | 0.00234932 |
| CENPE      | 185.969002 | -1.7114243 | 7.60E-05 | 0.00237544 |
| BRCA2      | 299.655358 | -1.5531872 | 7.62E-05 | 0.00237749 |
| SMIM8      | 158.99756  | 1.16118354 | 7.64E-05 | 0.00238084 |
| FAM222A    | 21.9603379 | -1.8034848 | 7.66E-05 | 0.00238217 |
| ISPD       | 81.2811233 | 1.28513183 | 7.71E-05 | 0.00239374 |
| LINC00667  | 576.972372 | 0.74147016 | 7.76E-05 | 0.00240019 |
| SYTL2      | 335.476005 | 1.99144379 | 7.76E-05 | 0.00240019 |
| DNAJB4     | 626.61137  | 1.44724042 | 7.88E-05 | 0.00243239 |
| QKI        | 5965.32111 | 0.71687965 | 7.91E-05 | 0.00243775 |
| DNMT3A     | 927.805446 | -1.0083287 | 7.94E-05 | 0.00244106 |
| ABTB2      | 232.164895 | -1.6585692 | 7.96E-05 | 0.00244412 |
| IL17D      | 73.5367361 | 1.93663018 | 8.01E-05 | 0.00245568 |
| PIGM       | 399.055253 | -0.7937959 | 8.06E-05 | 0.00246637 |
| LMO4       | 3536.85782 | 1.55861018 | 8.16E-05 | 0.00249338 |
| PDF        | 23.9345297 | -1.5398567 | 8.18E-05 | 0.00249397 |
| CEP120     | 1437.61695 | 1.22402124 | 8.22E-05 | 0.00250041 |
| CCNI2      | 9.66356134 | 2.88536249 | 8.31E-05 | 0.00252479 |
| GMPR       | 465.381328 | 1.65184384 | 8.33E-05 | 0.00252692 |
| CABLES2    | 249.552588 | -1.2358958 | 8.36E-05 | 0.0025296  |
| CS         | 2566.38966 | -0.7649442 | 8.48E-05 | 0.00252967 |
| ETNK1      | 1832.74558 | 0.82162691 | 8.44E-05 | 0.00252967 |
| FBXO8      | 333.779414 | 0.61519609 | 8.49E-05 | 0.00252967 |
| HIST1H3C   | 157.737725 | -1.8763874 | 8.41E-05 | 0.00252967 |
| L3MBTL4    | 289.252115 | 1.74017481 | 8.41E-05 | 0.00252967 |
| MCM2       | 339.926666 | -1.2918126 | 8.45E-05 | 0.00252967 |
| PHF3       | 3460.51166 | 0.81567075 | 8.49E-05 | 0.00252967 |
| SCUBE2     | 67.0789182 | 2.26465289 | 8.49E-05 | 0.00252967 |
| ZNF672     | 357.587882 | -0.8941488 | 8.41E-05 | 0.00252967 |
| DHRS12     | 147.70652  | 0.84435259 | 8.56E-05 | 0.00254162 |
| DNAH9      | 45.2005898 | 2.17102557 | 8.57E-05 | 0.00254162 |
| LOC1005066 | 101.449776 | -2.4628654 | 8.57E-05 | 0.00254162 |
| MEN1       | 407.190815 | -0.6828016 | 8.67E-05 | 0.00256658 |
| CKMT1A     | 9.41546909 | -2.9424299 | 8.81E-05 | 0.00259295 |
| HINT3      | 654.723417 | 1.03460684 | 8.79E-05 | 0.00259295 |
| SPC24      | 26.2604581 | -1.7224864 | 8.80E-05 | 0.00259295 |
| CRYL1      | 521.057548 | 1.22211735 | 8.84E-05 | 0.00259703 |
| IER3IP1    | 393.418654 | 0.89144267 | 8.87E-05 | 0.00260309 |
| TP73       | 14.1024329 | -2.0233717 | 8.94E-05 | 0.00262011 |
| BCAM       | 1809.13492 | -2.420144  | 9.12E-05 | 0.00264228 |
| C9orf72    | 327.127198 | 1.3037916  | 9.09E-05 | 0.00264228 |
| COX5B      | 1251.09146 | -0.7763162 | 9.07E-05 | 0.00264228 |
| CTD-220118 | 20.0337165 | 2.50661287 | 9.10E-05 | 0.00264228 |
| PMS2P5     | 126.289064 | -0.7909445 | 9.13E-05 | 0.00264228 |
| RPL21      | 7.56596272 | 2.77170684 | 9.10E-05 | 0.00264228 |
| ZFP2       | 52.6519586 | 1.65359319 | 9.09E-05 | 0.00264228 |
| MCM6       | 507.510335 | -1.0045768 | 9.21E-05 | 0.00266034 |
| APC2       | 46.4191172 | -2.2048045 | 9.45E-05 | 0.00272668 |
| NDUFS8     | 890.748786 | -0.8282238 | 9.50E-05 | 0.00273196 |
| NR2F2      | 4448.64928 | -2.0899679 | 9.50E-05 | 0.00273196 |

|          |            |            |            |            |
|----------|------------|------------|------------|------------|
| BVES     | 173.550331 | 2.33798944 | 9.56E-05   | 0.00274528 |
| ANKRD13B | 833.193348 | -1.8138214 | 9.75E-05   | 0.00278928 |
| OR7E2P   | 22.6363261 | 2.72066272 | 9.74E-05   | 0.00278928 |
| CCDC146  | 134.14664  | 1.50101021 | 9.78E-05   | 0.00279082 |
| SLC27A6  | 30.5007492 | -2.6890319 | 9.80E-05   | 0.00279082 |
| TSC22D3  | 6894.45486 | 1.53531031 | 9.80E-05   | 0.00279082 |
| EHMT1    | 1260.95715 | -0.6881422 | 9.86E-05   | 0.00280325 |
| PTGER2   | 101.362545 | 2.23272796 | 0.00010217 | 0.00289871 |
| ZDHHC12  | 155.950556 | -1.1282735 | 0.00010271 | 0.0029093  |
| KIAA1161 | 341.757211 | -2.1544188 | 0.00010313 | 0.0029142  |
| MYRF     | 68.3507771 | -2.7189276 | 0.00010322 | 0.0029142  |
| PSMB1    | 1032.56325 | 0.69186316 | 0.00010409 | 0.00293395 |
| IL18R1   | 80.7247321 | 1.95756547 | 0.00010482 | 0.00293996 |
| NUDT8    | 44.5598621 | -1.4081245 | 0.00010474 | 0.00293996 |
| TACO1    | 222.855513 | -0.8107289 | 0.00010465 | 0.00293996 |
| HSD17B4  | 1834.95704 | 0.70083812 | 0.00010531 | 0.00294889 |
| ECM2     | 2480.8377  | 1.1549121  | 0.00010609 | 0.0029658  |
| GRID1    | 201.862546 | -2.6496958 | 0.0001073  | 0.00299484 |
| LIMK1    | 555.058691 | -0.9101639 | 0.0001077  | 0.00300099 |
| C19orf66 | 402.274747 | 0.7229594  | 0.00010801 | 0.00300493 |
| KIF2C    | 42.8328453 | -1.6233373 | 0.000111   | 0.00308301 |
| MRPS11   | 275.781889 | -0.8835221 | 0.00011151 | 0.00308716 |
| TPI1P2   | 15.9895174 | -1.5956463 | 0.00011139 | 0.00308716 |
| POGK     | 1096.09634 | -0.5828263 | 0.00011191 | 0.00309316 |
| ZNF117   | 1499.85531 | 1.18010687 | 0.0001123  | 0.00309907 |
| ALDH1B1  | 306.219828 | -1.3351782 | 0.00011313 | 0.00311705 |
| TRUB2    | 336.876257 | -0.7230646 | 0.00011363 | 0.00312565 |
| HSPB7    | 78.4810681 | 1.92622992 | 0.00011422 | 0.00313677 |
| SPAG8    | 51.2605804 | 1.47120029 | 0.0001144  | 0.00313677 |
| COMTD1   | 43.638699  | -1.3962221 | 0.00011549 | 0.00316181 |
| ANXA2P2  | 87.8964958 | -1.3250098 | 0.00011571 | 0.00316277 |
| WDR12    | 311.855879 | -0.6765557 | 0.00011916 | 0.00325176 |
| TMX1     | 601.166302 | 0.67991768 | 0.00012145 | 0.00330907 |
| GPR88    | 38.8237346 | 2.80414094 | 0.00012179 | 0.00331312 |
| ATP5H    | 1054.35198 | -0.8692094 | 0.00012209 | 0.00331591 |
| CCSER1   | 98.7646479 | -1.8843108 | 0.00012296 | 0.00333432 |
| MARC2    | 154.133524 | -1.4746532 | 0.00012361 | 0.00334131 |
| SLC50A1  | 340.897958 | -0.8090785 | 0.00012348 | 0.00334131 |
| MTMR9LP  | 217.432809 | 2.18661547 | 0.00012423 | 0.00335274 |
| PRNP     | 2412.42909 | 0.98983822 | 0.000125   | 0.00336821 |
| PRC1     | 531.738753 | -1.69796   | 0.00012548 | 0.00337591 |
| SLC4A1   | 4.63005093 | 2.42326777 | 0.00012828 | 0.00344593 |
| RPLP2    | 3787.55906 | 0.55248754 | 0.00012984 | 0.00348248 |
| CCDC85B  | 104.358385 | -0.9078729 | 0.00013159 | 0.00351835 |
| RIPK3    | 39.7618223 | 1.3403813  | 0.00013149 | 0.00351835 |
| TIMELESS | 401.631126 | -1.127422  | 0.00013299 | 0.00355029 |
| DEPDC1   | 53.8861135 | -1.9310441 | 0.0001337  | 0.00356361 |
| UQCRC2   | 2133.71286 | -0.7663379 | 0.00013475 | 0.00358611 |
| CIAPIN1  | 471.391814 | -0.775412  | 0.00013539 | 0.00358831 |
| ERCC6L   | 21.3022483 | -1.9648254 | 0.00013546 | 0.00358831 |

|             |            |            |            |            |
|-------------|------------|------------|------------|------------|
| TSTD3       | 75.2298507 | 1.40353966 | 0.00013541 | 0.00358831 |
| SMAD7       | 660.240059 | 1.08154594 | 0.00013571 | 0.00358942 |
| POLN        | 77.5734597 | 1.32802293 | 0.0001372  | 0.00362309 |
| CREBRF      | 1789.91482 | 0.72846358 | 0.00013998 | 0.00368839 |
| LOC1005068  | 18.6346242 | 1.58540214 | 0.0001401  | 0.00368839 |
| PDPN        | 852.52662  | -1.4749944 | 0.00014577 | 0.00383168 |
| IARS        | 3244.03228 | -0.8212254 | 0.00014612 | 0.00383498 |
| LMBR1       | 1345.92297 | -0.923191  | 0.00014732 | 0.00385746 |
| SFT2D1      | 212.002906 | 0.86606002 | 0.00014742 | 0.00385746 |
| CCDC126     | 260.441051 | 1.6901095  | 0.00014802 | 0.00386125 |
| CYP27A1     | 913.354954 | 0.8026243  | 0.00014788 | 0.00386125 |
| PABPC3      | 32.6427085 | -1.7372337 | 0.00014883 | 0.00387646 |
| AKAP1       | 1228.87028 | -1.1822414 | 0.00014953 | 0.00388892 |
| CD82        | 238.571309 | -1.784179  | 0.00015233 | 0.00395569 |
| COMMD10     | 293.364288 | 1.04569473 | 0.00015261 | 0.00395715 |
| SMC4        | 1277.72898 | -1.2532868 | 0.0001531  | 0.00396385 |
| EIF4A2      | 5280.19509 | 0.75897535 | 0.0001542  | 0.00398148 |
| LZTFL1      | 439.450046 | 1.009042   | 0.00015425 | 0.00398148 |
| LYRM2       | 687.908591 | 1.2532591  | 0.00015628 | 0.00402789 |
| MDH1B       | 47.1730417 | 1.85376645 | 0.00015655 | 0.00402877 |
| TRAF3IP2-AS | 133.859045 | 1.6550858  | 0.00015717 | 0.00403876 |
| TMEM220     | 40.7422903 | 1.6260988  | 0.00015931 | 0.00408754 |
| SLC7A14     | 459.550986 | -2.6869834 | 0.0001598  | 0.00409399 |
| MPP6        | 1508.55775 | 1.92258463 | 0.00016022 | 0.00409865 |
| LAMC1       | 9140.33591 | -1.0575858 | 0.00016072 | 0.00410522 |
| CTBS        | 404.668931 | 0.93383506 | 0.00016194 | 0.00413038 |
| CLEC4E      | 88.6025144 | 2.26029415 | 0.00016302 | 0.0041424  |
| FGF14-AS2   | 37.7236256 | 1.60355708 | 0.00016304 | 0.0041424  |
| SLC1A1      | 176.119505 | 2.22655926 | 0.00016314 | 0.0041424  |
| SERPINB9    | 800.75722  | 1.68232157 | 0.0001636  | 0.00414789 |
| MAPT        | 53.5800608 | -1.7508615 | 0.00016478 | 0.00416561 |
| MRPS23      | 325.306119 | -0.4756168 | 0.00016454 | 0.00416561 |
| THEM6       | 322.956187 | -1.1712765 | 0.00016531 | 0.00417289 |
| HIST1H2BF   | 135.90679  | -1.5682674 | 0.00016597 | 0.00417732 |
| TIMP2       | 15337.4576 | -1.4029452 | 0.00016577 | 0.00417732 |
| BEND5       | 103.954372 | 1.95835568 | 0.00016721 | 0.0041901  |
| C10orf2     | 210.79507  | -1.3427407 | 0.00016717 | 0.0041901  |
| IDUA        | 403.377281 | -1.3818771 | 0.00016703 | 0.0041901  |
| NPHP1       | 108.689468 | 1.43120331 | 0.00016814 | 0.00420312 |
| NT5DC1      | 436.772834 | 1.13172376 | 0.00016822 | 0.00420312 |
| ERV3-1      | 844.687903 | 1.03330187 | 0.00016916 | 0.00422032 |
| FBXL5       | 3235.58885 | 0.73470678 | 0.00017094 | 0.00425249 |
| PCNXL3      | 1460.06875 | -0.8006624 | 0.00017081 | 0.00425249 |
| LOC1005074  | 8.13585309 | 2.15266794 | 0.00017308 | 0.00429952 |
| SAMD10      | 77.3553454 | -1.8050234 | 0.00017345 | 0.00430239 |
| LBX1-AS1    | 6.72389605 | -2.7623232 | 0.00017674 | 0.00437778 |
| MRPS2       | 338.229981 | -0.8415276 | 0.00017718 | 0.00438232 |
| C9orf16     | 448.900992 | -1.0814935 | 0.000178   | 0.00438992 |
| HES7        | 7.06358606 | -1.8078519 | 0.00017777 | 0.00438992 |
| FAM199X     | 1879.21858 | 1.18135795 | 0.00017858 | 0.00439263 |

|            |            |            |            |            |
|------------|------------|------------|------------|------------|
| LINC00222  | 7.00281924 | 2.44689419 | 0.00017862 | 0.00439263 |
| KCNK10     | 22.3266702 | 2.62817117 | 0.00017931 | 0.00440333 |
| C17orf89   | 191.105613 | -0.9962898 | 0.00018239 | 0.00446967 |
| ZNF345     | 163.831504 | 0.88053482 | 0.00018254 | 0.00446967 |
| CENPN      | 154.729313 | -1.4068752 | 0.00018315 | 0.00447841 |
| ZNF775     | 82.7527897 | -0.8315043 | 0.00018388 | 0.0044898  |
| CDC25A     | 63.8150687 | -1.6605987 | 0.00018518 | 0.0045105  |
| DDAH1      | 883.720379 | 1.56776742 | 0.00018525 | 0.0045105  |
| MAP1LC3C   | 28.8368735 | -2.5717236 | 0.00018571 | 0.00451522 |
| HLTF       | 1815.90079 | -0.6487671 | 0.00018731 | 0.00452973 |
| MKRN7P     | 25.706245  | 2.00038041 | 0.00018736 | 0.00452973 |
| SMYD5      | 336.704422 | -0.818111  | 0.00018691 | 0.00452973 |
| SNORA46    | 6.94855576 | 2.57228365 | 0.00018732 | 0.00452973 |
| C19orf48   | 388.061252 | -0.9302439 | 0.00018775 | 0.00453264 |
| SHPRH      | 1146.98563 | 0.70114834 | 0.00018847 | 0.00454371 |
| TSEN54     | 195.462697 | -1.4852239 | 0.00018961 | 0.00456479 |
| CLEC16A    | 1203.50919 | -0.9899233 | 0.00019203 | 0.00461642 |
| TTYH1      | 12.8939837 | -2.5504251 | 0.00019273 | 0.00462693 |
| EPN3       | 39.0606446 | -2.5126434 | 0.00019365 | 0.00464252 |
| CTXN3      | 1148.98939 | 2.56934706 | 0.00019435 | 0.00465283 |
| RAD51      | 41.4549046 | -2.028272  | 0.00019513 | 0.00466496 |
| LOC1006535 | 118.069318 | -1.4415257 | 0.00019652 | 0.00469157 |
| KIF23      | 504.074339 | -1.8319492 | 0.00019685 | 0.00469298 |
| TUBE1      | 172.559197 | 0.69283897 | 0.00019801 | 0.00471414 |
| TMEM220-A  | 3.66909545 | 2.59235512 | 0.00019864 | 0.00472259 |
| ITGB5      | 1486.03279 | 1.38972292 | 0.00020065 | 0.00475976 |
| KIF22      | 318.336416 | -0.8458277 | 0.00020076 | 0.00475976 |
| CLEC9A     | 94.168264  | 2.56631347 | 0.00020151 | 0.00476182 |
| KLHL8      | 379.232307 | 0.90601315 | 0.00020161 | 0.00476182 |
| RGS7BP     | 131.521175 | 2.45966387 | 0.00020168 | 0.00476182 |
| IGFL2      | 9.80452004 | -2.7067203 | 0.00020623 | 0.00486262 |
| BRIP1      | 145.270013 | -1.6470914 | 0.00020655 | 0.00486345 |
| WTAPP1     | 2.23001789 | -2.7925802 | 0.00020787 | 0.00488772 |
| MEDAG      | 360.800744 | 2.32246218 | 0.00021048 | 0.00494248 |
| RNFT2      | 172.232107 | -2.1771785 | 0.00021284 | 0.00499103 |
| CD200      | 81.4677834 | 1.78789969 | 0.00021609 | 0.00505838 |
| CDC14A     | 575.34166  | 1.26469451 | 0.0002166  | 0.00505838 |
| MGAM       | 144.19361  | 1.97981563 | 0.0002164  | 0.00505838 |
| TMEM219    | 792.831119 | 0.52105167 | 0.00021755 | 0.0050736  |
| KIF5C      | 103.809846 | -2.1571787 | 0.00021979 | 0.00511595 |
| ZBTB24     | 507.794376 | 1.07530935 | 0.00021996 | 0.00511595 |
| PITPNM3    | 157.055628 | 2.06480758 | 0.0002205  | 0.00512174 |
| CLPB       | 490.44286  | -0.465431  | 0.00022229 | 0.00514604 |
| HAPLN4     | 64.0068092 | -2.3859077 | 0.00022245 | 0.00514604 |
| SETD5      | 3290.06041 | -0.7038004 | 0.00022239 | 0.00514604 |
| HIST2H2BE  | 1047.9319  | -1.3371906 | 0.00022307 | 0.00515351 |
| ELL2       | 1144.52413 | 1.70244815 | 0.00022603 | 0.0052147  |
| FAM198A    | 1888.23166 | 1.85143871 | 0.00022733 | 0.0052377  |
| CLUH       | 966.350207 | -0.7759485 | 0.00022768 | 0.00523798 |
| FREM2      | 4270.30067 | -2.3613957 | 0.00022795 | 0.00523798 |

|          |            |            |            |            |
|----------|------------|------------|------------|------------|
| SHCBP1   | 101.887209 | -1.6350906 | 0.0002283  | 0.005239   |
| LAMC2    | 105.797996 | -2.1184559 | 0.00022915 | 0.00525151 |
| OLFM4    | 156.839495 | -2.2658996 | 0.00023002 | 0.00526441 |
| ATAD5    | 200.605286 | -1.120538  | 0.00023572 | 0.00538774 |
| ECHDC1   | 615.319592 | 0.7457743  | 0.00023685 | 0.0054005  |
| RAD51AP1 | 64.5557327 | -1.3771117 | 0.00023691 | 0.0054005  |
| ARFGAP2  | 1043.05913 | 0.61684891 | 0.00023864 | 0.00543261 |
| ABCB6    | 558.991916 | -0.8673554 | 0.00024024 | 0.00546192 |
| FAM180A  | 164.527557 | 2.70583731 | 0.00024115 | 0.00547536 |
| ECT2     | 364.725971 | -1.3469425 | 0.0002432  | 0.00551457 |
| ALYREF   | 411.112032 | -0.6654804 | 0.00024408 | 0.00552715 |
| RPS12    | 4924.09275 | 1.02797183 | 0.0002451  | 0.00554305 |
| ATHL1    | 630.743052 | 1.69968435 | 0.00024592 | 0.00555433 |
| TATDN2   | 1331.63807 | -0.7097336 | 0.00024757 | 0.0055842  |
| BAALC    | 71.4713469 | -2.4013083 | 0.00024814 | 0.0055896  |
| SERPINB1 | 1265.14137 | 1.06020756 | 0.00025026 | 0.00563014 |
| GPR19    | 4.51231855 | -2.3405214 | 0.00025067 | 0.00563186 |
| CNIH3    | 29.2256758 | 1.58847743 | 0.00025177 | 0.00564923 |
| PECAM1   | 500.989592 | 1.30065593 | 0.00025252 | 0.00565114 |
| STK31    | 30.9713347 | 2.01317594 | 0.00025247 | 0.00565114 |
| SULT1E1  | 305.737938 | -2.7503437 | 0.00025334 | 0.00566217 |
| MYO19    | 754.798381 | -0.9774903 | 0.00025391 | 0.00566753 |
| COX6A1   | 1643.23631 | -0.8745413 | 0.00025482 | 0.00568043 |
| ISG20L2  | 465.305487 | -0.5923765 | 0.0002558  | 0.00569485 |
| VGF      | 1.92302427 | -2.7568652 | 0.00025636 | 0.00570001 |
| NTNG1    | 51.024001  | -2.7255356 | 0.0002574  | 0.00571533 |
| UFSP1    | 18.8172231 | -1.4538489 | 0.00025771 | 0.00571533 |
| ARL14EP  | 347.435451 | 0.84196092 | 0.00025885 | 0.00571833 |
| NELFB    | 685.353606 | -0.5391594 | 0.00025874 | 0.00571833 |
| ZNF367   | 187.280192 | -1.314402  | 0.00025851 | 0.00571833 |
| GNMT     | 11.330862  | 1.90535331 | 0.00025973 | 0.0057304  |
| PABPC1   | 8493.45743 | -0.9059963 | 0.00026082 | 0.00574705 |
| SLC15A2  | 317.112991 | 1.80387542 | 0.00026206 | 0.00576704 |
| TOMM7    | 1399.7614  | 0.93116056 | 0.00026371 | 0.00579586 |
| IZUMO4   | 41.4960666 | 1.18277478 | 0.00026539 | 0.00582526 |
| PRSS23   | 864.365955 | 1.57010068 | 0.00026623 | 0.00583642 |
| SGK494   | 231.068438 | -1.3238711 | 0.00026804 | 0.00586861 |
| ROGDI    | 407.93226  | -1.1226007 | 0.00027051 | 0.00591495 |
| WDR78    | 118.769446 | 1.90270867 | 0.00027165 | 0.0059325  |
| CDH1     | 7468.2671  | -1.2556474 | 0.00027227 | 0.0059384  |
| DRICH1   | 7.22245582 | 2.21278142 | 0.00027426 | 0.00597417 |
| CCDC13   | 9.51709794 | 2.00881552 | 0.00027527 | 0.00598696 |
| YPEL3    | 529.709671 | 0.76011965 | 0.00027556 | 0.00598696 |
| ZDHHC23  | 49.3409826 | -1.8335836 | 0.00027589 | 0.00598696 |
| STAG3L2  | 473.697172 | -0.7593672 | 0.00027732 | 0.00601024 |
| BCL11A   | 17.5351864 | -2.1736591 | 0.00027897 | 0.00603838 |
| CIRBP    | 5289.07344 | 0.88801836 | 0.00028152 | 0.00608602 |
| FGFR1OP2 | 662.61098  | 0.62006022 | 0.00028336 | 0.00611805 |
| PPP6R3   | 2851.30307 | -0.4086823 | 0.00028716 | 0.00618193 |
| RPL10    | 7952.20635 | 0.75038017 | 0.0002874  | 0.00618193 |

|          |            |            |            |            |
|----------|------------|------------|------------|------------|
| SYNCRIP  | 2852.04262 | 0.47212743 | 0.00028683 | 0.00618193 |
| UHRF1    | 102.61957  | -1.483989  | 0.00029104 | 0.00625252 |
| NEDD9    | 655.022411 | 1.52155047 | 0.00029197 | 0.00626461 |
| ATP6V0E2 | 549.051721 | -0.9615738 | 0.00029274 | 0.0062655  |
| EIF3G    | 1276.96924 | 0.66037225 | 0.00029242 | 0.0062655  |
| CASD1    | 552.330167 | 0.56382499 | 0.00029335 | 0.00627076 |
| CCDC11   | 12.7544481 | 1.70852875 | 0.0002944  | 0.00627399 |
| GNAI1    | 309.201718 | -1.2610589 | 0.0002946  | 0.00627399 |
| TRIM22   | 4155.54578 | 0.82745872 | 0.00029429 | 0.00627399 |
| RABGAP1L | 3297.7452  | 0.96628967 | 0.00029734 | 0.00632444 |
| HRASLS5  | 64.0179346 | 2.61804389 | 0.00030002 | 0.00636779 |
| NEK11    | 154.088402 | 1.53529042 | 0.00030012 | 0.00636779 |
| CHRNA5   | 25.3652833 | -2.1777738 | 0.00030154 | 0.00639002 |
| ATCAY    | 3.94507772 | -2.7236418 | 0.00030655 | 0.00648815 |
| RPL22    | 2195.97502 | 0.66388227 | 0.00030725 | 0.00649501 |
| ASCC3    | 2055.64086 | 0.81505546 | 0.00031222 | 0.00659186 |
| TCF7L1   | 682.76036  | -1.1847665 | 0.00031293 | 0.00659878 |
| VWA3A    | 12.2849723 | 1.92270628 | 0.00031464 | 0.00662665 |
| FAM43A   | 818.239836 | -1.7119285 | 0.00031828 | 0.00669518 |
| ANAPC11  | 425.779214 | -0.6814031 | 0.00032019 | 0.00672712 |
| KNOP1    | 203.472487 | -0.822768  | 0.00032101 | 0.00673518 |
| MYCL     | 129.329519 | 2.15951465 | 0.00032136 | 0.00673518 |
| SLC44A1  | 2765.41702 | 1.49972265 | 0.00032243 | 0.0067412  |
| ZNF324   | 229.567101 | 0.85585224 | 0.00032205 | 0.0067412  |
| AP1S2    | 366.618719 | 1.29005768 | 0.00032316 | 0.00674826 |
| UTRN     | 10341.317  | 0.94465981 | 0.00032599 | 0.00679908 |
| ACACA    | 2473.18793 | -0.66383   | 0.00032761 | 0.0068245  |
| SNORA48  | 619.0239   | 1.48169208 | 0.00032819 | 0.00682842 |
| AACS     | 601.710288 | -1.002899  | 0.00033088 | 0.00686769 |
| STK33    | 237.241703 | 1.72459358 | 0.00033066 | 0.00686769 |
| AFF1     | 6208.74632 | 0.88285531 | 0.00033315 | 0.00690642 |
| TPX2     | 390.788123 | -1.8436142 | 0.0003338  | 0.00691154 |
| KIAA1467 | 424.627052 | 1.22224089 | 0.00033507 | 0.00692957 |
| CLMN     | 923.807581 | -1.44638   | 0.00033623 | 0.0069452  |
| BVES-AS1 | 4.53477223 | 2.60633349 | 0.00033695 | 0.00695154 |
| TBX3     | 33.676083  | -2.1322251 | 0.00033835 | 0.00697212 |
| SMU1     | 1469.66871 | 0.51103278 | 0.00033946 | 0.00698656 |
| ANKRD31  | 45.0577375 | -1.8227088 | 0.0003408  | 0.00700163 |
| NDE1     | 350.182163 | -0.7326301 | 0.00034101 | 0.00700163 |
| DAAM2    | 628.752793 | 1.89413437 | 0.00034402 | 0.00702463 |
| EHD3     | 240.767178 | -1.6482593 | 0.00034425 | 0.00702463 |
| MAZ      | 1359.05598 | -0.7936333 | 0.00034372 | 0.00702463 |
| PRR12    | 1120.22057 | -0.8146115 | 0.00034499 | 0.00702463 |
| SLC19A1  | 114.915368 | -1.4145532 | 0.00034421 | 0.00702463 |
| WBP4     | 299.217104 | 0.70031478 | 0.00034295 | 0.00702463 |
| ZNF280C  | 200.003222 | -0.5553735 | 0.00034499 | 0.00702463 |
| DUXAP10  | 24.6485984 | -2.1929618 | 0.00034606 | 0.00703807 |
| GKAP1    | 91.8152254 | 0.8986497  | 0.00034747 | 0.00705836 |
| MRPL24   | 487.134941 | -0.875862  | 0.00034908 | 0.00707775 |
| PLEKHA5  | 732.073681 | 1.41394243 | 0.00034925 | 0.00707775 |

|            |            |            |            |            |
|------------|------------|------------|------------|------------|
| AMN1       | 101.61935  | 0.7697038  | 0.00034974 | 0.00707932 |
| CLUAP1     | 430.119637 | 0.76276047 | 0.00035217 | 0.00710834 |
| EFNA2      | 15.0232553 | -1.6989717 | 0.0003518  | 0.00710834 |
| ZNF629     | 1094.04721 | -0.5937022 | 0.00035241 | 0.00710834 |
| ADORA1     | 15.2153744 | -2.0683476 | 0.00035569 | 0.00712571 |
| HIST1H2BB  | 80.4871698 | -1.6313733 | 0.00035577 | 0.00712571 |
| ICA1L      | 331.577227 | 1.39448677 | 0.00035497 | 0.00712571 |
| MT3        | 88.2658974 | -2.3415072 | 0.00035381 | 0.00712571 |
| MYO6       | 1747.78964 | 1.43897397 | 0.00035423 | 0.00712571 |
| PBK        | 37.2225468 | -1.9334803 | 0.00035467 | 0.00712571 |
| PURA       | 1612.97774 | 0.89935678 | 0.00035704 | 0.0071428  |
| ADAMTSL1   | 1852.45158 | 2.4035538  | 0.00035756 | 0.00714468 |
| APLP2      | 19794.6459 | -1.1439583 | 0.00035838 | 0.00714468 |
| FEZF1-AS1  | 12.441937  | -2.5732274 | 0.0003582  | 0.00714468 |
| CYTH2      | 834.183125 | -0.8593085 | 0.00035913 | 0.00715138 |
| KLHDC3     | 1157.79518 | 0.84009354 | 0.00036115 | 0.00718329 |
| SLC2A13    | 246.007447 | 1.30967873 | 0.00036206 | 0.00719308 |
| SGK1       | 3798.39874 | 1.71293932 | 0.00036262 | 0.00719573 |
| PVRL1      | 486.440156 | -1.3384071 | 0.00036314 | 0.00719773 |
| DPY19L2    | 220.61414  | 1.63114929 | 0.00036391 | 0.00720009 |
| ZBTB48     | 205.379868 | 0.74483056 | 0.00036409 | 0.00720009 |
| KRT4       | 453.065284 | -2.6299706 | 0.00036869 | 0.00728264 |
| TGFBR3     | 2424.63084 | 1.08442075 | 0.00037029 | 0.00730572 |
| FBXO22-AS1 | 1.95442496 | -2.6353469 | 0.00037084 | 0.00730819 |
| COL5A1     | 7409.96485 | -1.6046327 | 0.00037137 | 0.00731034 |
| C1QTNF7    | 44.6914944 | 2.50126262 | 0.00037236 | 0.00732136 |
| SLC47A1    | 10194.2277 | 2.03960855 | 0.00037902 | 0.00744373 |
| COL15A1    | 2588.66501 | -2.3350516 | 0.00038695 | 0.00759076 |
| AURKA      | 88.5183427 | -1.9142647 | 0.00039007 | 0.00760958 |
| LRRC71     | 48.8388597 | -2.6009    | 0.00038917 | 0.00760958 |
| MBD1       | 912.025414 | 0.60797465 | 0.00039015 | 0.00760958 |
| MX1        | 1313.02479 | 0.78456816 | 0.00038841 | 0.00760958 |
| PIGR       | 31.4368485 | 2.62055144 | 0.00039056 | 0.00760958 |
| ROBO4      | 278.578547 | 1.5555926  | 0.00038932 | 0.00760958 |
| HIVEP2     | 1274.95902 | 0.88478189 | 0.0003921  | 0.00763074 |
| LRRC43     | 29.8395875 | 1.94044149 | 0.00039298 | 0.00763937 |
| C1orf61    | 5.65114718 | -2.6721476 | 0.00039502 | 0.00767023 |
| LIX1       | 23.2924236 | -2.4326274 | 0.00039574 | 0.00767559 |
| GFRA2      | 8.90015368 | -2.4539263 | 0.00039779 | 0.00770655 |
| AKAP7      | 222.618187 | 1.51414192 | 0.00039979 | 0.00771918 |
| C1QTNF6    | 210.90213  | -1.3156552 | 0.00039905 | 0.00771918 |
| RPP25      | 126.694315 | -2.0517664 | 0.00039947 | 0.00771918 |
| SNHG5      | 398.424507 | 1.56288703 | 0.0004014  | 0.00774163 |
| IGSF9B     | 478.316946 | -1.8389657 | 0.00040291 | 0.00776201 |
| POLR1A     | 1424.26359 | -0.6260271 | 0.00040667 | 0.00782561 |
| SIPA1L1    | 6930.61488 | 1.56020076 | 0.00041167 | 0.00791303 |
| FGF19      | 3.42398509 | -2.6547609 | 0.00041317 | 0.00793304 |
| IGSF5      | 16.9181552 | -2.3804865 | 0.00041544 | 0.00796761 |
| HOXC13     | 4.01527941 | -2.6468542 | 0.00041699 | 0.00798848 |
| C6orf165   | 11.4857626 | 1.90845204 | 0.00041777 | 0.00799438 |

|            |            |            |            |            |
|------------|------------|------------|------------|------------|
| HIST1H3G   | 125.291072 | -1.957324  | 0.00041858 | 0.00800094 |
| LRCH4      | 1380.28941 | -0.8869965 | 0.00042027 | 0.00801721 |
| TCP10L     | 25.4245876 | 2.00348677 | 0.00042036 | 0.00801721 |
| ALPK3      | 372.864107 | 1.69378759 | 0.00042171 | 0.00802785 |
| MDN1       | 2624.69475 | 0.57704081 | 0.00042185 | 0.00802785 |
| GRIN1      | 3.56929355 | -2.6211876 | 0.00042274 | 0.00803588 |
| AHCTF1P1   | 13.9984223 | -1.3207502 | 0.00042327 | 0.00803691 |
| SPRY1      | 883.873878 | 1.51811925 | 0.00042475 | 0.0080561  |
| LIG1       | 478.567492 | -0.9787635 | 0.0004255  | 0.0080615  |
| LY75       | 42.8714803 | 1.77188116 | 0.00042645 | 0.00806309 |
| PCNXL4     | 953.39378  | 0.71159023 | 0.00042652 | 0.00806309 |
| NQO1       | 1214.71305 | -1.4251166 | 0.00042933 | 0.00810723 |
| AGAP3      | 1057.12357 | -0.5556818 | 0.00043016 | 0.00811389 |
| C11orf49   | 425.11031  | 1.02951865 | 0.00043121 | 0.00812366 |
| CHN2       | 333.07502  | 2.14774824 | 0.00043162 | 0.00812366 |
| TMEM143    | 105.593209 | -0.6951397 | 0.00043524 | 0.00818283 |
| PHKB       | 1920.71511 | -0.4251158 | 0.00043808 | 0.00822717 |
| POC1A      | 42.6338936 | -1.2196332 | 0.00043986 | 0.00825158 |
| C1orf228   | 12.7235425 | 1.74457565 | 0.0004428  | 0.00829763 |
| PSTPIP2    | 183.86777  | 1.25988232 | 0.00044346 | 0.00830094 |
| CYP2B7P    | 6.96294209 | 2.31578199 | 0.00045037 | 0.00842121 |
| FAM227A    | 60.8260312 | 1.49322171 | 0.00045161 | 0.00843512 |
| FAM53C     | 741.649547 | 0.81840915 | 0.00045365 | 0.00845511 |
| IGF2R      | 5656.93894 | 1.24874133 | 0.00045366 | 0.00845511 |
| TRIM38     | 976.435706 | 0.68409611 | 0.00045482 | 0.0084674  |
| CENPP      | 191.080109 | -0.989087  | 0.00045681 | 0.00849024 |
| FOXO2-AS1  | 580.797422 | -0.9114837 | 0.00045753 | 0.00849024 |
| KIAA1324L  | 2748.79652 | 1.48542067 | 0.00045704 | 0.00849024 |
| ZNF280A    | 3.61939963 | -2.5968003 | 0.00046161 | 0.0085567  |
| ATG5       | 447.358585 | 0.59771462 | 0.00046382 | 0.00857342 |
| BCLAF1     | 4208.30812 | 0.45696269 | 0.00046308 | 0.00857342 |
| TMEM132A   | 352.47559  | -1.6526519 | 0.00046401 | 0.00857342 |
| MIR4697HG  | 307.803117 | -1.8052062 | 0.0004653  | 0.00858801 |
| FLJ22184   | 16.6427191 | -2.0472247 | 0.00046583 | 0.00858864 |
| TTC9C      | 252.943509 | -0.5177111 | 0.00046751 | 0.00861028 |
| AHI1       | 723.757944 | 1.51247342 | 0.00047058 | 0.00864826 |
| CHDC2      | 19.0498656 | -2.5021497 | 0.00047037 | 0.00864826 |
| TXNDC16    | 766.549345 | 0.94596834 | 0.00047172 | 0.00866006 |
| HIST1H2AH  | 146.020914 | -1.3465764 | 0.00047492 | 0.00870946 |
| BRI3BP     | 156.965994 | -1.0533122 | 0.00047725 | 0.00874288 |
| KCNG3      | 19.0886033 | -2.3131418 | 0.00048022 | 0.00878784 |
| TFG        | 1539.74386 | -0.7803391 | 0.00048192 | 0.00880945 |
| NCAPD3     | 588.039419 | -0.6544449 | 0.00048346 | 0.00882835 |
| TCTN1      | 494.930716 | 0.86702725 | 0.00048767 | 0.00889566 |
| PTGES2     | 541.733352 | -0.9450819 | 0.000491   | 0.00894692 |
| ARHGEF18   | 637.881684 | 0.48352742 | 0.00049331 | 0.00897958 |
| KDM5A      | 3425.55025 | 0.62310116 | 0.0004948  | 0.00899705 |
| LOC1019278 | 13.6415573 | 1.99346691 | 0.00049571 | 0.00900416 |
| ENPP1      | 182.734759 | 1.99112161 | 0.00049705 | 0.0090189  |
| ZC2HC1C    | 190.43529  | 2.06617756 | 0.00049976 | 0.00905856 |

|           |            |            |            |            |
|-----------|------------|------------|------------|------------|
| LOC645752 | 37.683026  | -2.4711644 | 0.00050217 | 0.00909249 |
| TRAF3IP2  | 292.447989 | 0.90113694 | 0.00050501 | 0.00913428 |
| GANAB     | 7036.31685 | -0.5588857 | 0.00050808 | 0.0091802  |
| GLYCTK    | 256.651058 | 1.00326871 | 0.00051652 | 0.00932288 |
| DENND6B   | 75.1952559 | 0.87867641 | 0.00051878 | 0.00932427 |
| SFXN1     | 729.138422 | -0.972464  | 0.00051926 | 0.00932427 |
| SORD      | 261.05509  | -1.6133691 | 0.00051931 | 0.00932427 |
| ZNF709    | 202.976884 | 1.2710995  | 0.00051773 | 0.00932427 |
| ZNF786    | 169.182907 | -0.8853399 | 0.00051872 | 0.00932427 |
| C6orf120  | 1069.79294 | 0.63687579 | 0.00052222 | 0.00935846 |
| CLSPN     | 120.890194 | -1.4157742 | 0.00052231 | 0.00935846 |
| AKR1B10   | 34.7815551 | 2.37070458 | 0.00052405 | 0.00937009 |
| CD276     | 1494.62004 | -1.0966522 | 0.00052381 | 0.00937009 |
| MSH4      | 37.2783773 | 2.23438271 | 0.00052592 | 0.00939374 |
| SERGEF    | 241.94896  | 0.82451026 | 0.00053022 | 0.00946065 |
| NR4A2     | 177.499009 | 1.77336766 | 0.00053102 | 0.00946509 |
| CCDC23    | 125.917647 | 1.03644508 | 0.00053355 | 0.00950046 |
| LINC00607 | 219.169028 | 1.93491428 | 0.00053908 | 0.00958886 |
| TBPL1     | 142.037179 | 1.01580226 | 0.0005422  | 0.0096344  |
| CENPM     | 19.4258523 | -1.7363687 | 0.00054343 | 0.00964157 |
| ZSWIM7    | 129.849363 | 0.96215895 | 0.00054373 | 0.00964157 |
| IFNGR1    | 4121.99499 | 1.22723329 | 0.00054738 | 0.00969643 |
| LINC00701 | 8.25806476 | -2.6017299 | 0.00054798 | 0.00969697 |
| SNAP25    | 45.1372069 | -2.5578433 | 0.00055392 | 0.00979198 |
| ATP2B4    | 11224.2585 | -0.8012469 | 0.00055539 | 0.0098035  |
| PHB       | 1417.64125 | -0.6264266 | 0.00055571 | 0.0098035  |
| CMTM2     | 5.48949655 | 2.32230766 | 0.00056154 | 0.00989621 |
| TVP23C    | 356.452231 | 0.97451054 | 0.00056295 | 0.00991084 |
| PAFAH1B3  | 121.081069 | -1.1181021 | 0.0005641  | 0.00992086 |
| ZNF620    | 72.4764744 | -0.9863669 | 0.0005677  | 0.00997396 |
| FADS2     | 1395.51986 | -1.5303249 | 0.00056936 | 0.00999286 |
| CDADC1    | 165.734835 | 0.99768939 | 0.00057421 | 0.01006782 |
| LINC00158 | 13.6793854 | 2.16790398 | 0.00057906 | 0.01014234 |
| METTL7A   | 6182.46124 | 0.65708942 | 0.0005824  | 0.01019046 |
| ARID1B    | 2042.43249 | 0.65631411 | 0.00058487 | 0.01021283 |
| GPATCH3   | 129.474668 | 0.87759701 | 0.00058444 | 0.01021283 |
| ZDHHC9    | 543.702004 | -0.9479827 | 0.0005888  | 0.0102711  |
| RBFOX1    | 21.3835807 | -2.5506911 | 0.00059633 | 0.0103919  |
| PTPRZ1    | 18.5795642 | -2.5049354 | 0.00059696 | 0.01039231 |
| FAR2P1    | 7.22182673 | -2.5839337 | 0.00059993 | 0.01043341 |
| C5orf56   | 52.6780376 | 1.29945712 | 0.00060508 | 0.01051232 |
| ABCA3     | 2128.90513 | -0.9475983 | 0.00061301 | 0.01063927 |
| ATAD2     | 628.266586 | -1.0590913 | 0.00061454 | 0.01064586 |
| DIP2B     | 3110.53466 | 0.92607468 | 0.00061463 | 0.01064586 |
| FEN1      | 274.105763 | -0.8894933 | 0.00061654 | 0.01066823 |
| SP4       | 335.726343 | 0.8365278  | 0.00061806 | 0.01068375 |
| KRT8      | 291.577062 | -2.4465368 | 0.00062066 | 0.01071798 |
| CHD3      | 9304.14622 | 0.8638745  | 0.00062238 | 0.01073155 |
| KLHL29    | 1517.56186 | -1.971033  | 0.0006227  | 0.01073155 |
| CDKAL1    | 426.643791 | 0.87128862 | 0.00062661 | 0.01075478 |

|            |            |            |            |            |
|------------|------------|------------|------------|------------|
| NFE2L2     | 3043.2062  | -0.8009025 | 0.00062524 | 0.01075478 |
| PKD1L1     | 34.1632979 | 1.1771564  | 0.00062718 | 0.01075478 |
| SPIRE2     | 169.521862 | -1.7734803 | 0.00062701 | 0.01075478 |
| TNNC2      | 10.4054188 | 2.09127642 | 0.00062552 | 0.01075478 |
| HSP90AB1   | 11876.0734 | 0.54912065 | 0.00063429 | 0.01086585 |
| CLEC4A     | 56.5060472 | 1.3518071  | 0.00063696 | 0.01090043 |
| NAV1       | 4883.5019  | -1.4490387 | 0.00063758 | 0.01090043 |
| EP400      | 2598.34814 | -0.7586582 | 0.0006391  | 0.01091556 |
| PLEKHA6    | 7656.49845 | 1.47892494 | 0.00064083 | 0.01092596 |
| PRCC       | 644.901729 | -0.6471207 | 0.00064098 | 0.01092596 |
| PMPCA      | 568.093282 | -0.6324413 | 0.00064322 | 0.01095332 |
| KNTC1      | 754.776904 | -0.9587772 | 0.00064476 | 0.01096861 |
| CELF4      | 15.2574098 | -2.0726593 | 0.00064817 | 0.01101568 |
| VAMP5      | 175.638105 | 1.36506193 | 0.00064889 | 0.01101702 |
| THSD7B     | 75.8133064 | -2.3736436 | 0.00065513 | 0.01111201 |
| KIAA0753   | 471.568142 | 0.75042213 | 0.00066082 | 0.01111974 |
| GTSE1      | 34.7143867 | -1.652473  | 0.00066236 | 0.01121093 |
| TSPYL4     | 856.969345 | 1.00785359 | 0.00066292 | 0.01121093 |
| GSK3B      | 1761.52723 | -0.4823907 | 0.00066538 | 0.01124147 |
| MTERF      | 219.676622 | 0.7231728  | 0.00066741 | 0.01126453 |
| CITED2     | 1808.55421 | 1.1659712  | 0.00066923 | 0.01127316 |
| SLC6A6     | 1359.72084 | 1.69638836 | 0.00066863 | 0.01127316 |
| GALK1      | 200.079925 | -1.0292721 | 0.00067101 | 0.011292   |
| FBXO41     | 466.565362 | -1.186262  | 0.00067439 | 0.01133781 |
| ERG        | 263.338361 | 1.53195083 | 0.00068209 | 0.01145604 |
| TGIF1      | 447.221141 | 1.06593959 | 0.0006838  | 0.01147351 |
| HEBP2      | 285.393065 | 1.09503245 | 0.0006848  | 0.01147917 |
| CDH26      | 20.8486687 | 1.63060332 | 0.00068803 | 0.011522   |
| ATP5G1     | 406.348868 | -0.616238  | 0.00068934 | 0.01153267 |
| ARSA       | 504.567451 | 0.96638373 | 0.00069163 | 0.01155968 |
| AGBL1      | 71.4873392 | -2.5555105 | 0.00069544 | 0.01161215 |
| KIF13A     | 1826.96573 | 0.85809151 | 0.00069706 | 0.0116279  |
| ARL16      | 303.93674  | -0.7080554 | 0.00070145 | 0.01168971 |
| KCNA3      | 36.8001507 | 1.56119386 | 0.00070223 | 0.01169141 |
| LOC1002894 | 23.1401822 | 1.44852706 | 0.00070416 | 0.01170077 |
| PGM3       | 1062.47679 | 0.92753263 | 0.00070359 | 0.01170077 |
| LAMA3      | 120.226581 | 1.67962731 | 0.00071015 | 0.01177744 |
| LINC00312  | 31.537788  | 2.22219066 | 0.00070956 | 0.01177744 |
| PRDM5      | 648.327222 | 0.58186707 | 0.00071301 | 0.01181353 |
| HPS5       | 1020.79856 | 1.18090256 | 0.00071676 | 0.01183003 |
| MANEA-AS1  | 44.0807263 | 1.21652785 | 0.0007162  | 0.01183003 |
| PSME3      | 1219.87948 | -0.5683357 | 0.00071676 | 0.01183003 |
| RAB11B-AS1 | 43.0759939 | 0.98143442 | 0.00071641 | 0.01183003 |
| LOC652276  | 102.971761 | -0.7861904 | 0.0007198  | 0.01186871 |
| SMPD4      | 878.211737 | -0.6659528 | 0.00072127 | 0.01188154 |
| RAD54L     | 32.7019723 | -1.4802353 | 0.00072537 | 0.0119262  |
| RTN4R      | 82.9478643 | -2.0542796 | 0.0007249  | 0.0119262  |
| CXCL12     | 1501.52191 | -1.7522579 | 0.00072781 | 0.01195494 |
| ETV4       | 72.2173791 | -2.1214601 | 0.00073403 | 0.01204558 |
| TRAF2      | 152.357627 | -0.672361  | 0.00073713 | 0.01208493 |

|           |            |            |            |            |
|-----------|------------|------------|------------|------------|
| CXCR2     | 22.0034779 | 1.36684933 | 0.00074017 | 0.01212318 |
| CXXC1     | 472.669965 | 0.74988511 | 0.0007418  | 0.01213747 |
| DEDD      | 443.796016 | -0.4512689 | 0.0007428  | 0.01213747 |
| EEFSEC    | 207.238608 | -0.6317904 | 0.00074328 | 0.01213747 |
| HELLS     | 272.229174 | -1.2759679 | 0.00074388 | 0.01213747 |
| DEPDC5    | 342.36894  | -0.71447   | 0.00074775 | 0.01218918 |
| GEM       | 159.050382 | 1.61330438 | 0.0007488  | 0.01219463 |
| KIAA1109  | 13290.0036 | 0.84224612 | 0.00075396 | 0.01226585 |
| LINC00526 | 24.2214655 | 1.15954494 | 0.00075486 | 0.01226585 |
| SKA3      | 45.1535573 | -1.693946  | 0.00075532 | 0.01226585 |
| ZNF768    | 452.850313 | -0.6212267 | 0.00076331 | 0.01238402 |
| GAS2L3    | 98.3848839 | -1.1997331 | 0.00076684 | 0.01242941 |
| RSG1      | 72.8437744 | 1.14635632 | 0.00077373 | 0.01252934 |
| STRIP2    | 464.582219 | 1.55751546 | 0.00077577 | 0.01255048 |
| VGLL4     | 3631.38672 | -1.5983697 | 0.00077676 | 0.0125547  |
| FAM13B    | 1561.13317 | 0.7829212  | 0.0007776  | 0.0125564  |
| GRAMD4    | 352.805878 | 0.77383987 | 0.00078946 | 0.01272397 |
| RGS6      | 120.899621 | 2.45445058 | 0.00078941 | 0.01272397 |
| OR51B5    | 21.7851859 | 1.51782695 | 0.00079386 | 0.01278258 |
| ZNF781    | 103.333209 | 1.72735381 | 0.00079458 | 0.01278258 |
| HIST2H2BC | 4.62248636 | -1.947198  | 0.0007967  | 0.01280467 |
| APOL3     | 222.152169 | 1.26080589 | 0.00079951 | 0.01283774 |
| MRRF      | 361.857272 | -0.6480316 | 0.000801   | 0.01284968 |
| SOX8      | 19.3811529 | -1.599816  | 0.00080493 | 0.01290072 |
| SLC7A1    | 908.847362 | -2.1094332 | 0.00080579 | 0.0129024  |
| TEX41     | 10.7699936 | 2.10446287 | 0.00080726 | 0.01291398 |
| FANCI     | 376.9013   | -1.4713748 | 0.00080921 | 0.01292099 |
| PIK3CA    | 1256.98526 | 0.6452013  | 0.00080873 | 0.01292099 |
| POLDIP2   | 1321.63677 | -0.6357983 | 0.00081207 | 0.01295468 |
| URM1      | 535.743765 | -0.3947559 | 0.0008134  | 0.01296386 |
| IMPG2     | 132.547955 | 1.87564409 | 0.00081873 | 0.01303661 |
| MMRN2     | 280.507869 | 1.52336773 | 0.00081971 | 0.01304014 |
| HIST1H2AM | 160.33861  | -1.4159917 | 0.00082071 | 0.01304397 |
| BPTF      | 5759.07026 | -0.5260146 | 0.00082162 | 0.01304639 |
| CCNYL1    | 570.015206 | -0.8554106 | 0.00082421 | 0.01307536 |
| ZNF846    | 495.024866 | 1.05474189 | 0.00082588 | 0.01308977 |
| ASNS      | 414.753388 | -1.0760397 | 0.00083107 | 0.01315105 |
| HIST2H2AC | 705.021089 | -0.7854599 | 0.00083128 | 0.01315105 |
| LINC-PINT | 854.531119 | 0.9392736  | 0.00083346 | 0.01317347 |
| CRIP3     | 6.57396564 | 2.25831173 | 0.00084375 | 0.01332387 |
| FBXO30    | 397.274999 | 0.68010512 | 0.00084661 | 0.01335667 |
| API5      | 1232.93009 | 0.6437148  | 0.0008552  | 0.01338616 |
| MTMR3     | 1406.05999 | 0.53713502 | 0.00085254 | 0.01338616 |
| NCAPG2    | 371.805271 | -1.1149418 | 0.00085184 | 0.01338616 |
| NOL10     | 544.498879 | -0.4513555 | 0.00085102 | 0.01338616 |
| PAX9      | 5.73947602 | -2.5155941 | 0.00085132 | 0.01338616 |
| QPCT      | 44.2580963 | 1.91300845 | 0.00085582 | 0.01338616 |
| SLC12A1   | 82.9767408 | 2.3688517  | 0.00085628 | 0.01338616 |
| SNORA81   | 326.624824 | -1.0360242 | 0.00085561 | 0.01338616 |
| SORL1     | 4292.59305 | 1.85074367 | 0.00085604 | 0.01338616 |

|            |            |            |            |            |
|------------|------------|------------|------------|------------|
| SUGT1P1    | 22.5275922 | 1.45310488 | 0.00085514 | 0.01338616 |
| HEPACAM    | 8.42451798 | -2.4331217 | 0.00085922 | 0.01342    |
| FARSB      | 579.250145 | -0.7385949 | 0.00086331 | 0.01347152 |
| LOC1001315 | 769.435829 | 0.95873989 | 0.00086551 | 0.01349363 |
| TESK2      | 81.8882445 | 1.5007278  | 0.00086708 | 0.01350581 |
| TPTE2      | 7.92049855 | 2.21414128 | 0.00087311 | 0.01358739 |
| SH3PXD2A   | 12566.7607 | -0.99326   | 0.00087616 | 0.01362249 |
| CAB39L     | 2718.98204 | 1.78895093 | 0.00087959 | 0.01366348 |
| ZNF211     | 289.057166 | 0.73026132 | 0.00088072 | 0.01366869 |
| PCDH10     | 10.2754896 | -2.3483987 | 0.0008825  | 0.01367152 |
| RAB32      | 152.945861 | 0.97009227 | 0.00088245 | 0.01367152 |
| DCT        | 11.0323714 | 1.81197063 | 0.00088572 | 0.01370909 |
| TMEM97     | 409.811063 | -1.0603448 | 0.00089002 | 0.01376328 |
| POTEF      | 19.9034784 | -1.9900269 | 0.00089095 | 0.01376516 |
| TNRC6C-AS1 | 234.433402 | -1.0205555 | 0.00090117 | 0.01391066 |
| WASH7P     | 177.923923 | 0.71644305 | 0.00090301 | 0.01392651 |
| GTF3C2     | 971.728105 | -0.5848217 | 0.00090947 | 0.01401354 |
| ARHGDI1A   | 3365.20458 | -0.7468638 | 0.0009134  | 0.01406147 |
| PODN       | 824.051439 | 1.35421549 | 0.00091532 | 0.01407832 |
| MZT2A      | 226.557619 | -0.841242  | 0.00091877 | 0.01411878 |
| RAB6C-AS1  | 52.750054  | -2.4791947 | 0.00092657 | 0.01422593 |
| CRYBB3     | 19.752094  | -1.873805  | 0.00093471 | 0.01433799 |
| SLC26A4    | 18.4937026 | 1.84715152 | 0.00093949 | 0.01439848 |
| XAF1       | 760.702177 | 1.12881896 | 0.00094074 | 0.01440488 |
| AGPAT4-IT1 | 40.3628248 | 1.4021336  | 0.00094228 | 0.01441555 |
| FSIP1      | 13.0745615 | 1.96424024 | 0.00094943 | 0.01449903 |
| ZHX3       | 3305.23335 | 0.94441283 | 0.00094942 | 0.01449903 |
| RBM20      | 40.6283621 | 1.8180211  | 0.000951   | 0.01451014 |
| MKNK1      | 801.661173 | 0.72744228 | 0.00095586 | 0.01456397 |
| VANGL2     | 516.451115 | -0.9251137 | 0.00095622 | 0.01456397 |
| SHISA9     | 113.475738 | -2.4697819 | 0.00096233 | 0.01464401 |
| BLNK       | 254.60909  | 1.30838655 | 0.00096752 | 0.01470998 |
| KIAA0195   | 1376.32117 | -0.6742268 | 0.00096954 | 0.01472761 |
| ADAM20P1   | 95.4001076 | 1.07912814 | 0.00097107 | 0.01473778 |
| LDHD       | 57.4363316 | 2.0810704  | 0.00097869 | 0.01484029 |
| OIP5       | 13.6749362 | -1.8529186 | 0.00098239 | 0.01488327 |
| NUPL2      | 282.443895 | 0.66448509 | 0.00098696 | 0.01493935 |
| ORC6       | 47.0312714 | -1.6539333 | 0.00099024 | 0.01497567 |
| ADM2       | 17.0887549 | -2.4833428 | 0.00099381 | 0.01500576 |
| DBF4       | 112.437692 | -0.7421557 | 0.00099397 | 0.01500576 |
| FAM136A    | 324.771358 | -0.7351868 | 0.000998   | 0.0150533  |
| HOXA3      | 9.57066427 | -2.4390696 | 0.00100047 | 0.01507736 |
| MTSS1L     | 1950.35909 | -1.3330283 | 0.00100323 | 0.01510563 |
| DDX60L     | 841.930693 | 1.03687265 | 0.00101109 | 0.01514432 |
| FAM200A    | 140.450393 | 0.80604145 | 0.00100946 | 0.01514432 |
| IGFBP5     | 71990.9742 | 1.79861798 | 0.00100916 | 0.01514432 |
| MAPK7      | 387.18569  | -0.4740265 | 0.00101079 | 0.01514432 |
| SLC6A9     | 88.8878923 | -1.6424541 | 0.00100728 | 0.01514432 |
| TMEM164    | 598.739427 | -1.5243541 | 0.00100831 | 0.01514432 |
| ATXN2L     | 1903.58571 | -0.8029012 | 0.00101208 | 0.01514588 |

|           |            |            |            |            |
|-----------|------------|------------|------------|------------|
| GTF3C6    | 288.640715 | 0.71571628 | 0.00102437 | 0.01530628 |
| HIST1H3D  | 243.503527 | -0.8571971 | 0.00102458 | 0.01530628 |
| BANF1     | 512.565118 | -1.1107869 | 0.00102885 | 0.01535677 |
| ANGPTL7   | 159.347297 | 1.89685618 | 0.00103533 | 0.01543589 |
| C11orf84  | 255.113969 | -0.7763858 | 0.00103685 | 0.01543589 |
| TEX36     | 11.7532417 | -2.0582752 | 0.00103629 | 0.01543589 |
| FLJ44511  | 23.2600253 | 1.48068918 | 0.00103848 | 0.01544668 |
| LRP1B     | 4730.88506 | 2.11828722 | 0.00104043 | 0.01546225 |
| CDC5L     | 1168.58877 | 0.71811968 | 0.00104228 | 0.01547636 |
| NDUFS2    | 1026.07198 | -0.6910532 | 0.00104694 | 0.01553219 |
| CDON      | 2026.44798 | 1.7283299  | 0.00105006 | 0.015565   |
| WDR6      | 3278.65058 | 0.53714803 | 0.00105129 | 0.0155698  |
| LMCD1     | 293.560468 | 2.1149796  | 0.00105839 | 0.01564789 |
| RAD23B    | 3638.12527 | -0.5851232 | 0.00105823 | 0.01564789 |
| CDK16     | 1259.79543 | -0.6407904 | 0.00106956 | 0.01577217 |
| FZD10     | 34.6450296 | -1.8785482 | 0.00106784 | 0.01577217 |
| LMNB2     | 830.929838 | -0.8714802 | 0.00106999 | 0.01577217 |
| SLC8A3    | 11.3764376 | 2.17544036 | 0.00107047 | 0.01577217 |
| POLR1B    | 680.886028 | -0.7473993 | 0.00107212 | 0.01578301 |
| SLC12A2   | 6227.24271 | 1.50490712 | 0.001075   | 0.01581187 |
| BTBD8     | 31.8693083 | 1.37381761 | 0.0010768  | 0.01582466 |
| GNG10     | 82.1661998 | 0.59854729 | 0.00108078 | 0.01585791 |
| POLD1     | 352.813441 | -0.8032767 | 0.00108091 | 0.01585791 |
| FIRRE     | 88.4445081 | -2.1848263 | 0.00108281 | 0.01587229 |
| TUBG1     | 442.60965  | -0.7501704 | 0.00108842 | 0.01594083 |
| C11orf30  | 664.406054 | -0.4286919 | 0.00109067 | 0.01596029 |
| THUMPD1   | 1454.86319 | 0.54914854 | 0.00109364 | 0.0159827  |
| TTK       | 46.2068963 | -1.5909549 | 0.00109407 | 0.0159827  |
| KIF27     | 198.723246 | 0.98743832 | 0.00109549 | 0.01598993 |
| ANKRD20A5 | 164.038219 | 2.35921871 | 0.0010974  | 0.0160008  |
| ARHGAP6   | 343.355205 | 1.72580126 | 0.00109904 | 0.0160008  |
| MFAP2     | 271.579729 | -2.1492945 | 0.00109825 | 0.0160008  |
| NOL11     | 672.256752 | -0.5515633 | 0.00110058 | 0.01600975 |
| GJB2      | 2323.56971 | -1.2216983 | 0.00111424 | 0.01619475 |
| ITGA1     | 2831.42337 | 1.18643779 | 0.00111572 | 0.01620241 |
| METTL13   | 463.571822 | -0.6591453 | 0.00111171 | 0.01620887 |
| NUMBL     | 1017.90667 | -0.8866368 | 0.00112197 | 0.01623835 |
| PIP5K1A   | 1517.39512 | -0.6848042 | 0.00112184 | 0.01623835 |
| TSGA10    | 114.688363 | 1.15096485 | 0.00112088 | 0.01623835 |
| HSPA1B    | 38.0865077 | 1.88201411 | 0.00113418 | 0.01640121 |
| PPM1G     | 1029.99977 | -0.5481927 | 0.00113535 | 0.01640424 |
| DHRS9     | 8.59919656 | 2.07229699 | 0.00114666 | 0.01651616 |
| HS6ST1    | 981.297563 | -1.1076362 | 0.00114594 | 0.01651616 |
| KIAA1107  | 127.202916 | 1.26933344 | 0.00114523 | 0.01651616 |
| MALT1     | 703.414512 | 0.83104522 | 0.00114694 | 0.01651616 |
| CLN5      | 871.077128 | 0.81041164 | 0.00114873 | 0.01652807 |
| PGAM5     | 441.661146 | -0.7254994 | 0.00115234 | 0.01656615 |
| TBL1X     | 1058.13907 | -0.9528603 | 0.00115926 | 0.01665158 |
| RTN3      | 2431.61011 | -0.5887026 | 0.00116699 | 0.0167487  |
| RPS2      | 10162.5887 | -0.8593592 | 0.00116901 | 0.01675658 |

|           |            |            |            |            |
|-----------|------------|------------|------------|------------|
| TOPBP1    | 1027.30037 | -0.6243485 | 0.0011695  | 0.01675658 |
| N4BP2L1   | 221.310491 | 1.30641388 | 0.00117252 | 0.01678591 |
| CEND1     | 25.4753316 | -2.0891728 | 0.00118086 | 0.01689122 |
| LDB1      | 1356.77231 | -0.7355417 | 0.00118411 | 0.01692365 |
| DTYMK     | 158.971844 | -0.9208962 | 0.00118594 | 0.01693562 |
| CALCOCO1  | 4603.2491  | 0.9447423  | 0.00119208 | 0.01696681 |
| DUSP2     | 56.0722365 | 2.03554546 | 0.00119137 | 0.01696681 |
| LOC399715 | 74.3065689 | 1.58225127 | 0.00119032 | 0.01696681 |
| RNF44     | 822.404203 | -0.5585062 | 0.00119046 | 0.01696681 |
| C2orf43   | 656.493042 | -0.5790887 | 0.0011989  | 0.01704984 |
| SLC24A1   | 559.956949 | -0.9731202 | 0.00120182 | 0.01706303 |
| UBN1      | 1063.09455 | -0.4098324 | 0.0012012  | 0.01706303 |
| DUSP1     | 9526.6895  | 1.69431309 | 0.00120415 | 0.01708128 |
| GNAZ      | 163.723893 | 1.54890516 | 0.00120509 | 0.01708128 |
| SRSF5     | 3314.42385 | 0.84733288 | 0.00120766 | 0.01710351 |
| TAF4      | 371.591571 | -0.9113338 | 0.00121476 | 0.01718989 |
| RBM6      | 2258.99966 | 0.69247026 | 0.00121965 | 0.01723098 |
| RPGR      | 117.521233 | 1.20073122 | 0.00121967 | 0.01723098 |
| MARCH8    | 807.358721 | 0.63060868 | 0.00122345 | 0.0172694  |
| NEB       | 861.749288 | 1.8857499  | 0.0012248  | 0.0172694  |
| TCF3      | 805.010059 | -0.6407309 | 0.00122541 | 0.0172694  |
| KL        | 20.7511832 | 1.81634859 | 0.00123353 | 0.01736964 |
| TTC37     | 2802.69012 | 0.46802523 | 0.00123586 | 0.0173882  |
| LZIC      | 271.241402 | 0.7981519  | 0.0012412  | 0.01742106 |
| NNMT      | 383.609941 | 2.01117405 | 0.00124135 | 0.01742106 |
| PRX       | 553.153283 | 1.63794568 | 0.00123963 | 0.01742106 |
| SNCG      | 14.0055747 | 1.86687891 | 0.00124226 | 0.01742106 |
| IFT57     | 509.323907 | 0.80768151 | 0.00124425 | 0.01743474 |
| PPAP2B    | 2313.54713 | 1.48151375 | 0.00124621 | 0.01744189 |
| PXDC1     | 484.426921 | 1.04927616 | 0.00124679 | 0.01744189 |
| AK8       | 16.9643409 | 1.15585605 | 0.00124812 | 0.01744617 |
| ZNF461    | 147.47955  | 0.89032578 | 0.00125457 | 0.01752218 |
| CD48      | 64.2758482 | 1.69509866 | 0.00125692 | 0.01752637 |
| TRIT1     | 205.846052 | 1.02344734 | 0.00125668 | 0.01752637 |
| MRPS12    | 207.43249  | -0.7391524 | 0.0012651  | 0.01762618 |
| SMAD5-AS1 | 2.97624756 | 2.29281971 | 0.00126954 | 0.01767367 |
| USP53     | 5881.4522  | 1.07871471 | 0.00127635 | 0.01775405 |
| BATF3     | 14.6626612 | 1.85005375 | 0.00127975 | 0.01778692 |
| LOC151475 | 14.7566026 | 2.28365735 | 0.00128734 | 0.017878   |
| STARD5    | 76.9358054 | 1.87622851 | 0.00128936 | 0.01789152 |
| SYT13     | 6.53080471 | -2.1395836 | 0.00129998 | 0.01802433 |
| AMH       | 104.36811  | -2.042852  | 0.00130113 | 0.01802577 |
| OMA1      | 277.211105 | 0.84855611 | 0.00130675 | 0.01808895 |
| CUX1      | 3693.01544 | -0.6373571 | 0.00131141 | 0.01813885 |
| SSPN      | 723.469241 | 1.85922185 | 0.0013169  | 0.01820011 |
| AMMECR1   | 176.336145 | -0.7329185 | 0.00131935 | 0.01821938 |
| N4BP2L2   | 2986.44771 | 0.61252323 | 0.00132867 | 0.01832619 |
| SPATA9    | 5.88097492 | 2.36164314 | 0.00132963 | 0.01832619 |
| TMTC2     | 82.9161844 | -1.5272101 | 0.00133029 | 0.01832619 |
| CCDC144A  | 342.857556 | -2.1836111 | 0.0013353  | 0.01837411 |

|            |            |            |            |            |
|------------|------------|------------|------------|------------|
| CYP4X1     | 1206.0532  | 1.4790451  | 0.00133698 | 0.01837411 |
| PRR14      | 332.526327 | -0.726835  | 0.00133653 | 0.01837411 |
| HIST1H3I   | 102.375829 | -1.5673931 | 0.00133852 | 0.01837995 |
| SLC29A1    | 1862.06641 | 1.53272458 | 0.00133955 | 0.01837995 |
| FAM117A    | 252.76083  | 1.06305071 | 0.00134132 | 0.01838963 |
| DHRS3      | 3187.08943 | 1.27108662 | 0.00134326 | 0.01840154 |
| KCNK2      | 102.874146 | -2.4079047 | 0.00135331 | 0.01852437 |
| CD22       | 48.855432  | -2.0150464 | 0.00135752 | 0.01856718 |
| SLC22A4    | 47.9447114 | 1.37133686 | 0.00135937 | 0.01857765 |
| FBXO46     | 283.811015 | -1.0621151 | 0.00136261 | 0.01860719 |
| KIAA1210   | 182.747411 | 2.18429064 | 0.00137275 | 0.01871363 |
| RNF141     | 755.390069 | 0.94219926 | 0.00137368 | 0.01871363 |
| TPT1-AS1   | 141.408557 | 0.84978208 | 0.00137298 | 0.01871363 |
| SEZ6L2     | 569.938811 | -1.9488075 | 0.00137576 | 0.0187272  |
| TMEM140    | 180.20944  | 1.0890493  | 0.00137753 | 0.01873637 |
| DPEP1      | 11.5999979 | -2.3881286 | 0.00137956 | 0.01874917 |
| PHACTR2    | 15671.5525 | 0.97059167 | 0.00138543 | 0.01879731 |
| RBFADN     | 9.75974641 | 1.89671179 | 0.00138587 | 0.01879731 |
| SCARNA16   | 139.899167 | -1.0892116 | 0.00138639 | 0.01879731 |
| POPDC2     | 30.1829606 | 1.24874313 | 0.00139862 | 0.0189342  |
| RASGRF2    | 2030.80111 | 1.30832037 | 0.00139869 | 0.0189342  |
| GOLGA8M    | 42.8456256 | 1.95363469 | 0.00141164 | 0.01909441 |
| STARD13    | 1040.65172 | -1.5179136 | 0.00141283 | 0.01909544 |
| CC2D2B     | 11.3915146 | 1.60419915 | 0.00141791 | 0.01913401 |
| PTPRM      | 3437.50754 | 0.94727867 | 0.00141713 | 0.01913401 |
| CBX7       | 503.636443 | 0.90043663 | 0.00142249 | 0.01915064 |
| CCNH       | 535.254754 | 0.67580699 | 0.00142105 | 0.01915064 |
| SRGAP3     | 908.060117 | -1.3475568 | 0.00142158 | 0.01915064 |
| NLRP3      | 377.255365 | 1.60810064 | 0.00143    | 0.0192216  |
| ZNF383     | 149.23505  | 0.56142509 | 0.00142899 | 0.0192216  |
| ARHGAP5-AS | 40.8410053 | -1.2126579 | 0.00144512 | 0.01939449 |
| PAICS      | 1391.57257 | -1.0628082 | 0.00144459 | 0.01939449 |
| ANO4       | 82.8656861 | -2.3307418 | 0.00144694 | 0.01940199 |
| TLR2       | 1064.01813 | 1.43712542 | 0.00144794 | 0.01940199 |
| MTHFD2     | 570.18688  | -1.555792  | 0.00145185 | 0.01943918 |
| IMP4       | 302.271544 | -0.5173006 | 0.00145486 | 0.01945188 |
| MSH6       | 1167.95043 | -0.7531202 | 0.00145507 | 0.01945188 |
| ALB        | 12.7707844 | 2.13716151 | 0.00146465 | 0.01953441 |
| CALY       | 10.4902844 | -2.2873523 | 0.00146348 | 0.01953441 |
| SLC6A8     | 1079.59827 | 1.39457493 | 0.00146364 | 0.01953441 |
| GOLGA8N    | 135.817126 | 1.21111348 | 0.00146625 | 0.01954046 |
| ZWILCH     | 280.078151 | -1.0245607 | 0.00146833 | 0.01955307 |
| ADRA1A     | 17.3851513 | -2.2229752 | 0.00147056 | 0.01955876 |
| PCBP3      | 277.883941 | -1.9958919 | 0.00147202 | 0.01955876 |
| XYLT1      | 1042.28911 | -1.4154242 | 0.00147218 | 0.01955876 |
| LOC441455  | 8.00888039 | 2.23792754 | 0.00147451 | 0.01955946 |
| SUSD5      | 127.884015 | 1.94695076 | 0.00147368 | 0.01955946 |
| UBQLN3     | 51.0947575 | 1.08203849 | 0.0014809  | 0.0196291  |
| RPUSD3     | 173.666469 | -0.7551619 | 0.00148517 | 0.01967052 |
| ZNF626     | 659.279532 | 0.8496819  | 0.00149131 | 0.01973656 |

|           |            |            |            |            |
|-----------|------------|------------|------------|------------|
| MYO7B     | 24.0516677 | 2.11674593 | 0.00152023 | 0.02010378 |
| NIPSNAP1  | 680.404026 | -1.1118037 | 0.00152652 | 0.02017144 |
| PCNT      | 1513.83379 | -0.8046168 | 0.00153459 | 0.02026243 |
| RAB38     | 31.2899302 | -1.9385335 | 0.00154489 | 0.02038276 |
| GCC2      | 1725.90577 | 0.27822446 | 0.00154885 | 0.02039703 |
| KIF18A    | 29.8203684 | -1.5613537 | 0.00154953 | 0.02039703 |
| VPS13D    | 5773.80395 | 0.73994148 | 0.00154864 | 0.02039703 |
| ZC3H6     | 1001.56393 | 0.84668188 | 0.00155184 | 0.0204118  |
| HOXC9     | 18.2191577 | -2.3082431 | 0.00155821 | 0.0204799  |
| BICD2     | 1517.42892 | -0.4650648 | 0.00156343 | 0.02053268 |
| TMEM246   | 1454.52638 | -0.9449598 | 0.00157116 | 0.02061844 |
| MLST8     | 419.885853 | -0.8119297 | 0.00157265 | 0.02062228 |
| PMVK      | 265.110597 | -0.7989237 | 0.00157442 | 0.02062974 |
| HIST1H3H  | 165.466329 | -1.2465041 | 0.001577   | 0.02064781 |
| RASGRP2   | 246.020796 | -1.5377505 | 0.00158031 | 0.02067537 |
| DGKD      | 1005.66767 | -1.0953568 | 0.00158282 | 0.02067666 |
| GINS4     | 45.9884129 | -1.1116429 | 0.0015828  | 0.02067666 |
| MDGA1     | 452.818387 | 1.44577218 | 0.00158409 | 0.02067745 |
| ATP7A     | 878.68307  | 0.60677085 | 0.00159007 | 0.02073399 |
| HTRA3     | 115.611529 | -1.9645544 | 0.00159083 | 0.02073399 |
| C20orf203 | 23.8945126 | 1.67202131 | 0.00159227 | 0.02073693 |
| C1orf123  | 339.098564 | 0.67929291 | 0.00159466 | 0.02075231 |
| METTL1    | 110.521558 | -0.8840594 | 0.0015987  | 0.02078916 |
| FRMD1     | 40.6662829 | -2.2931675 | 0.00160686 | 0.02087857 |
| IFT43     | 102.6274   | 0.78871818 | 0.00160833 | 0.02087857 |
| RPF2      | 330.092652 | 0.73343398 | 0.00160923 | 0.02087857 |
| CIDECP    | 60.6673384 | -0.8729961 | 0.00161216 | 0.02090086 |
| PKDREJ    | 8.07039585 | 2.19793322 | 0.00161726 | 0.02095111 |
| TBC1D14   | 2002.44375 | -0.5134443 | 0.00162086 | 0.02098191 |
| KCNA6     | 134.354028 | 2.25921186 | 0.00163131 | 0.02108543 |
| LOC553103 | 66.6447826 | 1.57572177 | 0.00163029 | 0.02108543 |
| ASB9      | 19.9470507 | -1.2824627 | 0.00163274 | 0.02108798 |
| C4orf19   | 260.21719  | -1.9235691 | 0.00163426 | 0.02109176 |
| ANKRA2    | 331.00809  | 0.68854292 | 0.00164811 | 0.02125459 |
| CYB561D2  | 130.909645 | 0.84178676 | 0.00166573 | 0.02142863 |
| ENOSF1    | 606.87895  | 0.888267   | 0.00166698 | 0.02142863 |
| FAM46D    | 9.67180719 | -2.3634494 | 0.00166532 | 0.02142863 |
| RNU12     | 74.7621188 | 0.98104957 | 0.00166785 | 0.02142863 |
| ZNF598    | 504.48218  | -0.9352137 | 0.00166365 | 0.02142863 |
| LOC284454 | 166.860445 | 1.5410739  | 0.00167103 | 0.02145337 |
| FBXW5     | 1028.12965 | -0.5847952 | 0.00167952 | 0.02154626 |
| PCLO      | 379.418928 | -1.6093939 | 0.00169019 | 0.021667   |
| KIAA0895L | 506.729482 | -0.8688515 | 0.00169386 | 0.02168168 |
| PDLIM4    | 455.807233 | 1.14305266 | 0.00169346 | 0.02168168 |
| UBE2Z     | 1953.94047 | -0.481603  | 0.00169603 | 0.0216933  |
| PLK4      | 88.5812264 | -1.2616449 | 0.0016994  | 0.02171596 |
| SEMA3A    | 90.9769536 | -2.2390008 | 0.00170033 | 0.02171596 |
| HIST1H2BM | 74.7731647 | -1.630031  | 0.00171408 | 0.02187392 |
| NRBP1     | 1392.6956  | -0.5950193 | 0.00171603 | 0.02187392 |
| PPAN      | 36.8174755 | 0.93601344 | 0.00171653 | 0.02187392 |

|            |            |            |            |            |
|------------|------------|------------|------------|------------|
| TGFB3      | 877.302045 | 1.5296332  | 0.00171947 | 0.02189517 |
| MMP24      | 97.9497532 | -1.7218602 | 0.00174567 | 0.02221226 |
| SLC30A3    | 31.3840526 | 2.33144292 | 0.00174723 | 0.02221567 |
| ABCC11     | 5.14627126 | -1.663518  | 0.00175106 | 0.02224796 |
| MIR497HG   | 140.53445  | 1.8097588  | 0.00175469 | 0.02227758 |
| COLCA2     | 57.9434186 | -1.5781837 | 0.00176062 | 0.0223033  |
| ISG15      | 229.526947 | 1.12564002 | 0.00175841 | 0.0223033  |
| MRPL15     | 355.684002 | -0.6988205 | 0.00175971 | 0.0223033  |
| ALX3       | 129.268985 | 1.89454435 | 0.00176783 | 0.02234746 |
| C18orf25   | 705.410681 | 0.78464656 | 0.00177089 | 0.02234746 |
| PIK3R2     | 1126.92232 | -0.7046522 | 0.00177271 | 0.02234746 |
| SLC7A5P2   | 387.411109 | -1.1620926 | 0.00177151 | 0.02234746 |
| TMEM145    | 22.6635677 | -1.9476691 | 0.00177322 | 0.02234746 |
| ZNF483     | 1141.64274 | 1.2003137  | 0.00177125 | 0.02234746 |
| ZSCAN18    | 1087.84174 | 1.08709938 | 0.00176793 | 0.02234746 |
| MTRNR2L3   | 6.38629406 | 1.92188361 | 0.00177616 | 0.02236161 |
| WDR5       | 612.734883 | -0.6049902 | 0.00177694 | 0.02236161 |
| DMXL1      | 2812.67913 | 0.78179718 | 0.00178006 | 0.02238445 |
| MIR3648    | 141.038687 | -2.2819623 | 0.00178294 | 0.02240427 |
| TRNT1      | 341.594119 | -0.6775007 | 0.00178878 | 0.02244627 |
| YDJC       | 81.7557394 | -1.0961784 | 0.0017889  | 0.02244627 |
| CCDC86     | 235.156243 | -0.9846193 | 0.00179326 | 0.02248454 |
| ATP5G3     | 1738.5021  | -0.7470066 | 0.00180191 | 0.02251152 |
| CASC2      | 45.2944467 | 0.96569208 | 0.00180086 | 0.02251152 |
| CYP26A1    | 11.7710599 | -2.268612  | 0.00180197 | 0.02251152 |
| KLHDC7A    | 249.154821 | -2.3001673 | 0.00180188 | 0.02251152 |
| NOL12      | 192.768799 | 0.65715334 | 0.00180068 | 0.02251152 |
| ADM5       | 23.7002989 | -1.5809722 | 0.0018098  | 0.02259287 |
| TMEM8A     | 624.680858 | -0.7398685 | 0.0018128  | 0.02261384 |
| HIST2H2BF  | 408.625992 | -1.1284759 | 0.00181485 | 0.022623   |
| CAPN15     | 595.673267 | -0.8337828 | 0.00181781 | 0.02264347 |
| MANEAL     | 174.625186 | -1.7606648 | 0.00182364 | 0.02266079 |
| PHIP       | 4273.47166 | 0.70014487 | 0.00182111 | 0.02266079 |
| PPP5D1     | 11.9107552 | 1.65724052 | 0.00182448 | 0.02266079 |
| WBP1L      | 6237.28752 | 1.14858199 | 0.00182306 | 0.02266079 |
| SH3GL2     | 33.4481035 | -2.2401612 | 0.00182834 | 0.0226923  |
| HSPD1      | 3471.52048 | -0.7911154 | 0.00183062 | 0.02270397 |
| RAMP3      | 72.5314518 | 1.65853324 | 0.00183193 | 0.02270397 |
| IGIP       | 548.507441 | 0.89061304 | 0.0018418  | 0.02280994 |
| H1FO       | 1087.20752 | -1.0180609 | 0.00185702 | 0.02298181 |
| ZNF467     | 175.011364 | -1.3437564 | 0.00185988 | 0.02300064 |
| AKT1S1     | 577.730136 | -0.8209276 | 0.00186135 | 0.02300216 |
| CCND3      | 565.787627 | 0.82966504 | 0.00186348 | 0.02301198 |
| OXCT1-AS1  | 10.7933478 | 1.93867419 | 0.00186677 | 0.02303604 |
| CNKSR3     | 481.436455 | 1.18824583 | 0.00187067 | 0.02306759 |
| LRFN3      | 106.25239  | -0.6709613 | 0.00187811 | 0.02313979 |
| SS18L1     | 377.735792 | -0.7317658 | 0.00187922 | 0.02313979 |
| LDLRAP1    | 735.039113 | 1.25392629 | 0.00188272 | 0.02315087 |
| LOC1019269 | 3.52232998 | 2.33419946 | 0.00188282 | 0.02315087 |
| ANKRD52    | 1940.0204  | -0.9352525 | 0.00188514 | 0.02316277 |

|           |             |            |            |            |
|-----------|-------------|------------|------------|------------|
| MYOZ3     | 216.823416  | 1.86596615 | 0.00188908 | 0.02319462 |
| ARHGAP11A | 250.559868  | -1.4059606 | 0.00189135 | 0.02320583 |
| GPR98     | 21.0285112  | -1.8334219 | 0.00189588 | 0.02324482 |
| FAM168B   | 2917.646668 | -0.4738943 | 0.00189961 | 0.02326561 |
| GIN1      | 165.686935  | 0.71009026 | 0.00190028 | 0.02326561 |
| SNX3      | 1470.6351   | 0.63466901 | 0.00191116 | 0.02338205 |
| EGFR-AS1  | 3.53965923  | -1.8959241 | 0.00191468 | 0.02340844 |
| CCDC69    | 131.54201   | 1.40398792 | 0.0019269  | 0.02354115 |
| C6orf132  | 12.6005264  | -2.3114981 | 0.00193955 | 0.02367879 |
| NEIL3     | 21.9375522  | -1.4096827 | 0.00194428 | 0.0237196  |
| ADAM28    | 425.738729  | 1.45637306 | 0.00194703 | 0.0237363  |
| ANKRD39   | 82.5393955  | -0.633842  | 0.00194988 | 0.02373775 |
| C11orf80  | 112.893948  | -0.9771489 | 0.00194993 | 0.02373775 |
| SNORA71C  | 10.1039381  | -1.8841957 | 0.00195242 | 0.02373775 |
| TNIK      | 301.680645  | 1.81349997 | 0.00195268 | 0.02373775 |
| SAMD5     | 753.352076  | 2.21781763 | 0.00195476 | 0.02374621 |
| TMPRSS3   | 3.16872455  | -2.3367347 | 0.00195755 | 0.02376333 |
| SH3BGRL   | 2278.6696   | 0.72133478 | 0.00196362 | 0.02380337 |
| UBA7      | 869.551753  | 1.23154543 | 0.00196345 | 0.02380337 |
| MAPK10    | 479.180439  | 1.28570429 | 0.00196654 | 0.02382193 |
| ZNF852    | 107.091429  | 0.84069095 | 0.00196798 | 0.02382257 |
| MGC16142  | 19.1928651  | 1.32236974 | 0.00197084 | 0.02382362 |
| UBALD2    | 257.897039  | -0.7006199 | 0.0019703  | 0.02382362 |
| SLC28A1   | 8.10139347  | 2.1616262  | 0.0019733  | 0.02383647 |
| CASKIN2   | 926.435967  | -1.3650059 | 0.00198529 | 0.0239589  |
| CDC37L1   | 253.619267  | 0.97923231 | 0.00198622 | 0.0239589  |
| BST2      | 292.811953  | 1.21128721 | 0.00199052 | 0.02399385 |
| GLDC      | 179.335586  | -1.555167  | 0.00199728 | 0.0240585  |
| SETDB2    | 428.468732  | 0.59536124 | 0.00200112 | 0.02408784 |
| CHST6     | 7.5452823   | -1.7644237 | 0.00200887 | 0.02416413 |
| KIAA1671  | 5491.90052  | -0.978085  | 0.00201254 | 0.02419132 |
| RUNX2     | 368.127697  | 1.83845344 | 0.00202923 | 0.02437493 |
| CEP135    | 268.464728  | 0.73812753 | 0.00203335 | 0.02440735 |
| EPN1      | 1333.33974  | -0.7001034 | 0.0020478  | 0.02456362 |
| CNOT1     | 4960.34791  | -0.5330523 | 0.00206265 | 0.02472438 |
| LINC00924 | 87.6838434  | -2.1783988 | 0.00207451 | 0.02484926 |
| C19orf44  | 196.918869  | 1.06943921 | 0.0020776  | 0.02485152 |
| INMT      | 6039.0062   | 2.29047259 | 0.00207739 | 0.02485152 |
| CACNA1D   | 402.722824  | 2.1126815  | 0.00208416 | 0.02491267 |
| ATR       | 1338.0322   | -0.4561585 | 0.00208634 | 0.0249129  |
| SWSAP1    | 40.8051496  | 0.94865981 | 0.00208708 | 0.0249129  |
| AARS      | 2841.97073  | -0.9119378 | 0.00208913 | 0.02491565 |
| INTS6-AS1 | 35.3352901  | 0.89585559 | 0.00209167 | 0.02491565 |
| LRRC48    | 50.7255488  | 1.57746465 | 0.00209082 | 0.02491565 |
| BBS7      | 300.710476  | 0.65525523 | 0.0021019  | 0.02495098 |
| EBF1      | 946.67931   | 1.93238051 | 0.00210169 | 0.02495098 |
| GLS       | 2802.80877  | 1.04353209 | 0.00209776 | 0.02495098 |
| PVT1      | 110.385797  | -1.276991  | 0.00209769 | 0.02495098 |
| UBE3C     | 1945.50272  | -0.3856154 | 0.00209936 | 0.02495098 |
| COL6A4P2  | 28.3936823  | 2.17892167 | 0.0021036  | 0.02495394 |

|            |            |            |            |            |
|------------|------------|------------|------------|------------|
| ST6GALNAC6 | 1098.5731  | 0.87724115 | 0.00210952 | 0.02500679 |
| PRDM8      | 11.6510162 | -1.939293  | 0.00212252 | 0.0251299  |
| SNHG17     | 129.264675 | -1.1479919 | 0.00212429 | 0.0251299  |
| ZNF563     | 102.954463 | 1.38196685 | 0.00212343 | 0.0251299  |
| KCTD15     | 552.634963 | -1.0083246 | 0.00213128 | 0.02519525 |
| TPBG       | 305.037937 | 1.09215723 | 0.00213381 | 0.02520775 |
| XRCC2      | 77.5902277 | -1.4217765 | 0.00213565 | 0.02521208 |
| DBI        | 556.306062 | -0.6273194 | 0.00213752 | 0.02521691 |
| C4orf48    | 55.6614555 | -1.3618402 | 0.00214283 | 0.02524486 |
| RPTOR      | 1338.83402 | -0.6139392 | 0.00214266 | 0.02524486 |
| TFAP4      | 104.857285 | -1.1782069 | 0.00214523 | 0.0252557  |
| NBPF25P    | 34.2175364 | 1.18453755 | 0.00215296 | 0.02532934 |
| ERMAP      | 285.49061  | 0.98228088 | 0.00215708 | 0.02534338 |
| SLITRK6    | 123.111736 | -2.2010578 | 0.0021571  | 0.02534338 |
| HVCN1      | 181.578435 | 1.17118226 | 0.00215989 | 0.02535877 |
| LINC00482  | 28.6124186 | -1.9599555 | 0.00216486 | 0.02539598 |
| MGAT4A     | 1446.76123 | 1.16156178 | 0.0021675  | 0.02539598 |
| PDE3A      | 827.964064 | 1.63464726 | 0.00216624 | 0.02539598 |
| LPIN2      | 1288.03502 | 0.99598819 | 0.00217349 | 0.02544885 |
| MSH2       | 482.392743 | -0.6713693 | 0.00218145 | 0.02552463 |
| FAM200B    | 581.44751  | 0.51611362 | 0.0021879  | 0.02558259 |
| FLJ46906   | 15.5370701 | 1.77057748 | 0.00219892 | 0.02569398 |
| DYM        | 860.664124 | 0.64457483 | 0.00220421 | 0.0257383  |
| AIFM2      | 351.726048 | -0.7121389 | 0.00221972 | 0.02586662 |
| USP33      | 1390.7408  | 0.70003407 | 0.00221868 | 0.02586662 |
| VSIG10     | 348.898276 | -0.9725678 | 0.00221857 | 0.02586662 |
| SVEP1      | 2438.44533 | 2.15137922 | 0.00222757 | 0.0259405  |
| KRT77      | 4.085993   | -2.3068073 | 0.00223381 | 0.02597789 |
| RAB6C      | 10.7675914 | -1.5524791 | 0.00223375 | 0.02597789 |
| PEX6       | 461.457982 | 1.04115247 | 0.00223897 | 0.02601573 |
| SYT12      | 14.1424868 | -2.0374528 | 0.00224137 | 0.02601573 |
| TSPAN17    | 435.818983 | -0.9193898 | 0.00224161 | 0.02601573 |
| HDDC3      | 137.6595   | -0.7656883 | 0.00224364 | 0.02602172 |
| AGBL3      | 29.3883431 | 1.13879267 | 0.00224958 | 0.02603103 |
| CNTNAP3    | 621.028277 | -1.6557585 | 0.00225051 | 0.02603103 |
| FAM64A     | 15.2264474 | -1.6789353 | 0.00224954 | 0.02603103 |
| IPO5P1     | 435.821779 | 1.02487849 | 0.00225031 | 0.02603103 |
| CPNE5      | 95.6677313 | 1.99367537 | 0.00225728 | 0.02609171 |
| CCDC138    | 73.9127432 | -0.5774792 | 0.00226303 | 0.02614056 |
| ATP6V1B1   | 27.2981235 | -2.0595787 | 0.00226827 | 0.0261659  |
| ZBTB37     | 497.227017 | -0.5592586 | 0.00226811 | 0.0261659  |
| KIAA1683   | 193.335389 | 1.31557697 | 0.00227975 | 0.02628066 |
| GRPEL1     | 320.813641 | -0.6581938 | 0.00228474 | 0.02632051 |
| KANK1      | 885.014032 | 1.27561841 | 0.00229197 | 0.02637684 |
| PTGER3     | 6.90526532 | 1.91933055 | 0.0022927  | 0.02637684 |
| SLITRK2    | 11.3109762 | -2.2757585 | 0.00229508 | 0.02638648 |
| KIRREL3    | 4.82672072 | -2.1735542 | 0.00229878 | 0.02641139 |
| C15orf27   | 7.50547587 | -1.8465818 | 0.00230478 | 0.02645727 |
| FHOD1      | 776.051157 | -1.089511  | 0.00230586 | 0.02645727 |
| IFT81      | 299.923009 | 0.60856935 | 0.00231709 | 0.0265331  |

|            |            |            |            |            |
|------------|------------|------------|------------|------------|
| PDGFD      | 3156.2016  | 1.65724122 | 0.00231696 | 0.0265331  |
| PHACTR1    | 201.472804 | 1.70122327 | 0.00231711 | 0.0265331  |
| FH         | 639.949501 | -0.6753713 | 0.00232258 | 0.02657733 |
| POLR2D     | 468.423871 | -0.4943714 | 0.00232406 | 0.02657733 |
| CEACAM4    | 10.403475  | 1.65952401 | 0.00235067 | 0.02686369 |
| ELP2       | 1234.85893 | 0.72694637 | 0.00235363 | 0.02687957 |
| SLC25A39   | 1067.18085 | -0.5633387 | 0.00236066 | 0.02694197 |
| ZNF317     | 683.117942 | 0.59954327 | 0.00236632 | 0.02698859 |
| LOC1005073 | 3.18088161 | -2.2356352 | 0.00237075 | 0.02702124 |
| HIC1       | 713.997397 | -1.0488258 | 0.00237396 | 0.02703987 |
| UBE2S      | 221.664508 | -1.1287797 | 0.00237853 | 0.02707387 |
| C11orf21   | 18.2819229 | 1.723905   | 0.00240997 | 0.02739543 |
| GAS2L1     | 226.95251  | -0.6765103 | 0.00240907 | 0.02739543 |
| LGI4       | 129.714652 | 1.28664855 | 0.00241567 | 0.02744209 |
| RTKN       | 340.108024 | -0.9052746 | 0.00241833 | 0.02745417 |
| ZNF780A    | 676.609415 | 0.70440351 | 0.00242146 | 0.02747152 |
| ASIC4      | 5.73547159 | -2.0473093 | 0.00244386 | 0.0276643  |
| PPP1R12B   | 2820.14057 | 0.82207233 | 0.00244402 | 0.0276643  |
| SIAE       | 782.419322 | -1.1490476 | 0.00244082 | 0.0276643  |
| XPOT       | 2103.59205 | -0.8276514 | 0.0024449  | 0.0276643  |
| INPP4B     | 174.572546 | 1.1141902  | 0.00245153 | 0.02772106 |
| STRADA     | 607.466999 | -0.5826338 | 0.00245501 | 0.02774208 |
| LOC1019270 | 5.4688666  | 2.11789512 | 0.00246    | 0.02777048 |
| SLC7A5     | 522.395957 | -1.8423006 | 0.00246198 | 0.02777048 |
| ZNF699     | 117.556287 | 0.92135152 | 0.00246238 | 0.02777048 |
| LOC1002889 | 44.2998711 | 1.41331866 | 0.00246623 | 0.02779572 |
| CYP4F35P   | 93.1341738 | 2.27658624 | 0.0024679  | 0.02779626 |
| LOC80154   | 18.2344592 | -1.3162345 | 0.00247186 | 0.02782263 |
| ABCG4      | 27.4083914 | -1.8459429 | 0.00247445 | 0.02782814 |
| FLYWCH1    | 970.298389 | -0.5388438 | 0.00247559 | 0.02782814 |
| VPS4A      | 1178.91948 | -0.5227625 | 0.00248368 | 0.02790078 |
| PI16       | 162.197352 | 2.25894177 | 0.00249929 | 0.02805776 |
| B9D1       | 101.488171 | 0.90952674 | 0.00251138 | 0.02817504 |
| PRUNE2     | 139.367841 | -1.6484438 | 0.00251416 | 0.02818784 |
| RPL7L1     | 630.540234 | 0.62640303 | 0.00251929 | 0.02822694 |
| SOCS1      | 27.7106868 | -1.8197845 | 0.0025299  | 0.02832732 |
| LOC1019282 | 8.37696555 | -2.2437666 | 0.0025316  | 0.02832787 |
| PIGW       | 161.076146 | -0.8311094 | 0.00253546 | 0.02835261 |
| LYRM5      | 272.291057 | 0.7780649  | 0.00253716 | 0.02835312 |
| CLEC17A    | 17.0755281 | 2.10527402 | 0.0025513  | 0.02849256 |
| TRIM59     | 104.285691 | -1.4915594 | 0.00255907 | 0.02856079 |
| EFHC1      | 621.460441 | 0.84114958 | 0.00256659 | 0.02862611 |
| ZNF865     | 297.538663 | -1.054857  | 0.00257296 | 0.02867849 |
| ECHDC3     | 20.682522  | 1.75190217 | 0.00260729 | 0.02904227 |
| BMP1       | 1444.4165  | -0.9636938 | 0.0026341  | 0.02912831 |
| C14orf80   | 51.5381201 | -0.9517562 | 0.00263229 | 0.02912831 |
| C7orf26    | 256.251098 | 0.52554711 | 0.00262359 | 0.02912831 |
| CELF6      | 188.39072  | 1.28035862 | 0.00263063 | 0.02912831 |
| DKK2       | 971.753515 | -2.2385058 | 0.00262703 | 0.02912831 |
| FILIP1L    | 401.501959 | 1.28244023 | 0.00263538 | 0.02912831 |

|            |            |            |            |            |
|------------|------------|------------|------------|------------|
| IQCB1      | 332.698005 | 0.62879103 | 0.00262556 | 0.02912831 |
| LOC1001314 | 8.10775353 | 1.88770947 | 0.00262319 | 0.02912831 |
| LOC284023  | 69.7033385 | 0.9981956  | 0.00263256 | 0.02912831 |
| NUP62      | 956.34253  | -0.3875187 | 0.00261888 | 0.02912831 |
| PTRH2      | 164.272518 | -0.9115543 | 0.00262318 | 0.02912831 |
| TLE2       | 1579.92989 | 1.22272486 | 0.00262285 | 0.02912831 |
| HSD3B7     | 207.873995 | -0.754137  | 0.00263927 | 0.02915254 |
| CEP95      | 635.981727 | -0.6787631 | 0.00267079 | 0.02948177 |
| C16orf80   | 268.822049 | -0.605006  | 0.00267865 | 0.02954948 |
| SLITRK5    | 6.45844416 | -2.0323308 | 0.0026888  | 0.02964241 |
| PGBD4      | 70.8775149 | -0.764577  | 0.00269194 | 0.02965799 |
| CXorf30    | 16.2048557 | -2.2448123 | 0.00269396 | 0.02966124 |
| KLHL6      | 194.884969 | 1.42870633 | 0.0026978  | 0.02967356 |
| LINC01279  | 507.128826 | 1.56427215 | 0.00270021 | 0.02967356 |
| TBX1       | 15.6004767 | -1.8923872 | 0.00270027 | 0.02967356 |
| ZYG11B     | 1650.3326  | 0.7238526  | 0.00270408 | 0.02969641 |
| FOXP3      | 4.36980564 | -1.7370081 | 0.00271164 | 0.02976042 |
| IL18       | 634.034858 | -0.9102616 | 0.00271391 | 0.02976178 |
| KANSL1L    | 1056.9378  | 0.92679548 | 0.00271575 | 0.02976178 |
| YAF2       | 754.190019 | 0.76165758 | 0.00271697 | 0.02976178 |
| SPRED1     | 1874.73876 | 0.52033233 | 0.00272041 | 0.02978055 |
| GTF2IRD1   | 714.480897 | -0.9446843 | 0.00272245 | 0.0297839  |
| GUCY1B2    | 9.22127151 | -2.2306617 | 0.00273555 | 0.02990807 |
| BRE-AS1    | 27.3683528 | 1.8095816  | 0.00274658 | 0.03000961 |
| OXLD1      | 103.244284 | -0.5406022 | 0.00275274 | 0.03005771 |
| UBFD1      | 1725.84616 | -0.5059559 | 0.00275764 | 0.03009208 |
| PSAPL1     | 35.1864233 | -2.1773792 | 0.00276415 | 0.03014397 |
| FLYWCH2    | 416.410859 | -0.8182537 | 0.00276809 | 0.0301678  |
| LINC00649  | 17.1048066 | 2.09563293 | 0.00277686 | 0.03022611 |
| SPOP       | 1115.7336  | 0.57903286 | 0.00277696 | 0.03022611 |
| GOPC       | 981.931201 | 0.7071263  | 0.00279119 | 0.03034251 |
| KIAA1217   | 4459.2736  | -0.8931673 | 0.00278978 | 0.03034251 |
| FLJ44087   | 20.9248549 | 1.85475741 | 0.00279781 | 0.03039521 |
| TOMM40L    | 233.406411 | -0.8850135 | 0.00281627 | 0.03055703 |
| TRAPPC2P1  | 60.9524381 | 0.87142056 | 0.00281577 | 0.03055703 |
| SERPINE2   | 319.120369 | -1.4838467 | 0.00282104 | 0.03058943 |
| GTF3C4     | 626.887436 | -0.5212839 | 0.00283938 | 0.03076892 |
| LOC728819  | 5.38740955 | -1.9859064 | 0.00284615 | 0.03078711 |
| SGK2       | 44.7542483 | 1.58068277 | 0.00284644 | 0.03078711 |
| SPOPL      | 1083.20439 | 1.05369952 | 0.00284422 | 0.03078711 |
| ZNF92      | 265.127591 | -0.4800261 | 0.00285171 | 0.0308247  |
| TMEM127    | 1434.95239 | -0.3940036 | 0.00287918 | 0.031102   |
| CEP57L1    | 202.982479 | 1.16681374 | 0.0028818  | 0.03111074 |
| ARHGAP11B  | 37.5565646 | -1.5538388 | 0.00288698 | 0.03114707 |
| NP1PB5     | 97.6179968 | -1.0755123 | 0.00289101 | 0.0311588  |
| PLCD3      | 2516.06217 | -0.7896383 | 0.0028917  | 0.0311588  |
| PTPN9      | 1561.63929 | -0.8772841 | 0.00290426 | 0.03127451 |
| BCORL1     | 431.188534 | -1.1173065 | 0.00291956 | 0.0314037  |
| PLD4       | 244.614243 | 1.71729877 | 0.0029206  | 0.0314037  |
| PLEKHG2    | 1521.60421 | -0.8719122 | 0.00292174 | 0.0314037  |

|            |            |            |            |            |
|------------|------------|------------|------------|------------|
| HECW2      | 510.993587 | 1.67470575 | 0.00293644 | 0.03152219 |
| MAL        | 5.58643138 | -2.2415046 | 0.0029357  | 0.03152219 |
| SKINTL     | 12.5098149 | 1.58898557 | 0.00293839 | 0.0315234  |
| CNN3       | 1946.36516 | 0.64357193 | 0.00294091 | 0.03153071 |
| CABYR      | 17.2545992 | -1.4840561 | 0.00294555 | 0.03156073 |
| MCM9       | 406.378184 | 0.83597208 | 0.00295022 | 0.0315911  |
| ZIC4       | 353.318379 | -1.4340981 | 0.00295705 | 0.03164451 |
| ELAVL2     | 7.00070138 | 1.79317064 | 0.00296863 | 0.0317486  |
| ARHGAP23   | 2334.15158 | -0.6891403 | 0.00297048 | 0.03174865 |
| CXCR3      | 3.73398302 | 1.97557066 | 0.00297243 | 0.03174972 |
| C10orf10   | 326.467562 | 1.52702163 | 0.00297756 | 0.03178466 |
| SULF2      | 12251.6404 | 1.12218386 | 0.00297958 | 0.03178647 |
| BHMT       | 29.6301781 | 2.02894476 | 0.00298506 | 0.03181551 |
| DPF1       | 4.66312355 | -1.9908934 | 0.00298786 | 0.03181551 |
| SAMD4A     | 5484.72354 | 1.42868595 | 0.00298647 | 0.03181551 |
| AGAP2-AS1  | 34.7799133 | -1.5218028 | 0.00299218 | 0.03184177 |
| TSSC4      | 261.846306 | 0.62365705 | 0.00299969 | 0.03190195 |
| CDK5       | 89.6437799 | -0.8598243 | 0.00300432 | 0.03193132 |
| CDC40      | 564.143543 | 0.73144953 | 0.00300675 | 0.03193744 |
| HNRNPUL2   | 602.587041 | -0.5771393 | 0.00301328 | 0.031987   |
| ALKBH3     | 240.849193 | 0.55163155 | 0.00301919 | 0.03202986 |
| PIK3IP1    | 771.311773 | 1.3391692  | 0.00303552 | 0.03217628 |
| VAV2       | 608.345885 | -0.961902  | 0.00303674 | 0.03217628 |
| ECM1       | 77.4429685 | -1.4668723 | 0.00304113 | 0.03218313 |
| PSMD3      | 1309.90554 | -0.5565736 | 0.00303952 | 0.03218313 |
| UBXN7      | 968.380507 | -0.4073598 | 0.00304868 | 0.03224312 |
| IRF4       | 18.3652543 | 1.39533644 | 0.00305133 | 0.03225131 |
| HTRA1      | 1853.75891 | 1.31171851 | 0.00307628 | 0.03247501 |
| ZMYND15    | 112.62855  | 1.40587389 | 0.00307579 | 0.03247501 |
| PPP1R1C    | 7.68977215 | -2.1400877 | 0.00307887 | 0.03248234 |
| JAM2       | 11206.6255 | 1.44161607 | 0.00308586 | 0.0325117  |
| LOC1005064 | 9.45037946 | 2.2017099  | 0.00308923 | 0.0325117  |
| NR4A3      | 297.675063 | 1.9593387  | 0.00308734 | 0.0325117  |
| SQRDL      | 669.381428 | 0.91723628 | 0.00308884 | 0.0325117  |
| DNASE1L1   | 856.695277 | -0.5893268 | 0.00310852 | 0.0326835  |
| ITPKB-IT1  | 45.551863  | 1.05962862 | 0.00310936 | 0.0326835  |
| ATXN1      | 3059.14247 | 0.75874907 | 0.00311838 | 0.03275831 |
| FBXO43     | 9.97592291 | -1.6382124 | 0.00312881 | 0.03284771 |
| FBXL17     | 770.537304 | 0.76777469 | 0.00313605 | 0.03290364 |
| BRD8       | 1065.22849 | 0.6275343  | 0.00314287 | 0.03291777 |
| CAPN11     | 8.89213929 | 1.66030271 | 0.00314315 | 0.03291777 |
| CTTNBP2    | 202.042694 | 1.81996252 | 0.00313973 | 0.03291777 |
| FAM3B      | 11.7808148 | -1.5665217 | 0.00314832 | 0.03293761 |
| NDUFA10    | 988.718609 | -0.5720463 | 0.00314889 | 0.03293761 |
| SGCE       | 325.000852 | -1.7066447 | 0.00315103 | 0.03293995 |
| AGAP7      | 21.8353381 | 1.91922691 | 0.00315836 | 0.03297642 |
| PLCB1      | 1204.2541  | 1.7986061  | 0.00315809 | 0.03297642 |
| GATSL2     | 433.089985 | -0.7931639 | 0.00316029 | 0.03297648 |
| CCNB1      | 169.743903 | -1.332297  | 0.00316632 | 0.0330194  |
| CCDC173    | 7.16817592 | 1.51809253 | 0.0031686  | 0.03302312 |

|            |            |            |            |            |
|------------|------------|------------|------------|------------|
| LOC1019277 | 11.2567284 | 2.15955449 | 0.00317062 | 0.03302414 |
| ACOT7      | 131.250765 | -0.8565235 | 0.00317911 | 0.03307665 |
| CCDC28B    | 34.83675   | -0.7602251 | 0.00317952 | 0.03307665 |
| ZNF333     | 436.357303 | 0.65533731 | 0.00318821 | 0.03314699 |
| P4HB       | 8102.18497 | -0.656894  | 0.00319318 | 0.03317848 |
| COX10      | 223.447136 | -0.6940084 | 0.00319768 | 0.03320517 |
| ICT1       | 167.615082 | -0.5547789 | 0.00320898 | 0.03330235 |
| NAA35      | 431.049041 | -0.4752047 | 0.00321725 | 0.03336808 |
| IGSF9      | 72.9243955 | -1.6547553 | 0.00322132 | 0.0333882  |
| ZBTB40     | 1197.91602 | 0.60060505 | 0.00322308 | 0.0333882  |
| ADRA1D     | 47.0123034 | -2.2222005 | 0.00322835 | 0.03341237 |
| TMSB10     | 9563.38218 | -0.6862328 | 0.00322931 | 0.03341237 |
| HOXA10     | 13.466388  | -2.1785338 | 0.00323644 | 0.03346598 |
| ARHGAP39   | 179.145835 | -0.8979501 | 0.00324336 | 0.03351733 |
| CLN6       | 471.400778 | -0.9462971 | 0.00325089 | 0.03353456 |
| OMG        | 3.62716979 | -2.1362132 | 0.00324897 | 0.03353456 |
| SH2D5      | 2.6379253  | -1.9990579 | 0.00324741 | 0.03353456 |
| CWF19L2    | 536.221555 | 0.49689868 | 0.00326332 | 0.03364259 |
| TTYH3      | 1302.16912 | -1.1148581 | 0.00326996 | 0.03369078 |
| ZNF790     | 179.599959 | 0.91393891 | 0.00327495 | 0.03372198 |
| ZNF570     | 167.595273 | 0.79038363 | 0.00328024 | 0.03375621 |
| TRIM34     | 9.88774366 | 1.26376214 | 0.00328495 | 0.0337844  |
| ANKRD12    | 2654.2596  | 0.67000308 | 0.00329048 | 0.03379695 |
| LANCL2     | 335.874484 | 0.91996958 | 0.00329154 | 0.03379695 |
| SETD1A     | 764.348102 | -0.7953112 | 0.00329208 | 0.03379695 |
| PCOLCE-AS1 | 53.4071483 | -1.5260806 | 0.00331221 | 0.03398329 |
| EIF3L      | 2962.5386  | 0.73848238 | 0.00332319 | 0.03407563 |
| FAM193A    | 1086.89607 | -0.5423206 | 0.00332862 | 0.0341109  |
| CRIP1      | 685.351879 | 0.61474065 | 0.00333901 | 0.03417658 |
| POLE2      | 28.3302203 | -1.1597844 | 0.00333731 | 0.03417658 |
| ARRDC3     | 3943.74734 | 1.4993014  | 0.00334339 | 0.03420097 |
| GRAP       | 43.2620164 | 1.20165407 | 0.00335355 | 0.03426888 |
| ZNF683     | 3.49856481 | 2.08451443 | 0.00335402 | 0.03426888 |
| DNAH1      | 1314.94222 | 0.87274393 | 0.00335644 | 0.0342732  |
| AMMECR1L   | 624.136662 | -0.5269141 | 0.0033623  | 0.03429248 |
| ZDHHC5     | 1861.59247 | -0.5246145 | 0.00336232 | 0.03429248 |
| PLEKHB1    | 60.9126636 | -1.6646    | 0.00336558 | 0.03430533 |
| TATDN1     | 144.003179 | -0.5157176 | 0.00337364 | 0.03436708 |
| BACH2      | 171.15765  | 1.26558268 | 0.00337587 | 0.03436935 |
| ATG4B      | 780.806814 | -0.6534321 | 0.00338649 | 0.03443668 |
| ZNF98      | 19.8905506 | 1.96203235 | 0.0033862  | 0.03443668 |
| DDX3X      | 6830.4636  | 0.50700198 | 0.0033942  | 0.03447422 |
| FKBP11     | 170.719731 | -0.8750328 | 0.00339322 | 0.03447422 |
| HLF        | 4432.03454 | 1.16894727 | 0.00339848 | 0.03447694 |
| STRA13     | 157.436413 | -0.7513179 | 0.00339836 | 0.03447694 |
| NS3BP      | 93.6033922 | 1.01946589 | 0.00340821 | 0.03455516 |
| RGS4       | 79.459636  | -1.9995343 | 0.00341898 | 0.03464388 |
| DLGAP3     | 14.0346719 | -1.1511147 | 0.0034269  | 0.03469705 |
| HDC        | 13.7689203 | 2.02540466 | 0.00343099 | 0.03469705 |
| LAMA1      | 1020.64707 | -1.9198952 | 0.00343433 | 0.03469705 |

|            |            |            |            |            |
|------------|------------|------------|------------|------------|
| SH2B2      | 16.078944  | -1.5034074 | 0.00343324 | 0.03469705 |
| TXK        | 62.4823468 | 1.67300261 | 0.00343206 | 0.03469705 |
| SSBP2      | 1204.60617 | 1.16182746 | 0.00343711 | 0.03470473 |
| C20orf194  | 1481.06887 | 0.71335669 | 0.00344003 | 0.03471379 |
| NPR1       | 40.018206  | 1.4444875  | 0.00344906 | 0.03477488 |
| TCP11      | 1.90789901 | 2.19517296 | 0.00345014 | 0.03477488 |
| CELF5      | 7.07496766 | -2.0492878 | 0.00345463 | 0.03477928 |
| PID1       | 442.443753 | 1.85208177 | 0.00345295 | 0.03477928 |
| CLK2       | 837.271851 | -0.7422949 | 0.00345735 | 0.03478631 |
| B4GALT3    | 367.580251 | -0.686504  | 0.00346156 | 0.03480574 |
| NRTN       | 5.87377629 | -2.1383976 | 0.00346334 | 0.03480574 |
| FOSB       | 1731.02116 | 1.951142   | 0.00347191 | 0.03487147 |
| EPHA3      | 144.490435 | -1.7017574 | 0.00347838 | 0.03491597 |
| LPAR1      | 1126.66865 | -0.851735  | 0.00348578 | 0.03495502 |
| NOP14      | 724.742903 | -0.526919  | 0.00348634 | 0.03495502 |
| DUOX1      | 265.837448 | 2.17163537 | 0.00349513 | 0.03502271 |
| SLC12A8    | 17.4713755 | -1.2700377 | 0.00350678 | 0.035119   |
| ANGPT1     | 66.5151633 | 1.88728614 | 0.00351928 | 0.03522357 |
| PALB2      | 324.168775 | -0.3810841 | 0.00352526 | 0.0352629  |
| KCNS2      | 3.10866281 | -2.1957787 | 0.00352766 | 0.03526631 |
| CDC45      | 35.4211497 | -1.9012009 | 0.00355011 | 0.03546772 |
| ENKD1      | 174.809903 | 1.0066853  | 0.00355381 | 0.03546772 |
| PBX2       | 12.5627942 | 1.41616003 | 0.003554   | 0.03546772 |
| CALML3-AS1 | 36.1948565 | -1.9452597 | 0.00355769 | 0.03548384 |
| MST1P2     | 35.0872945 | -1.6806911 | 0.0035753  | 0.03563878 |
| ELOVL6     | 297.159586 | -1.0998733 | 0.00358597 | 0.03572441 |
| ACSM5      | 61.6258427 | 1.43799747 | 0.00360542 | 0.03589733 |
| COQ7       | 404.555662 | 0.41333173 | 0.00361051 | 0.03590733 |
| GINS1      | 118.288493 | -1.2995917 | 0.00361061 | 0.03590733 |
| GPN1       | 371.757219 | -0.4579104 | 0.00361549 | 0.03593503 |
| CCNE2      | 44.0237407 | -1.3728496 | 0.00362062 | 0.03596321 |
| SCP2       | 1382.84572 | 0.73142934 | 0.00362251 | 0.03596321 |
| IGF2BP2    | 583.631992 | -2.0478642 | 0.00362465 | 0.03596366 |
| UBALD1     | 208.924472 | -1.1329715 | 0.00362765 | 0.03597259 |
| BOP1       | 215.742917 | -0.7810554 | 0.0036439  | 0.03611294 |
| NME4       | 1020.00106 | -0.9943617 | 0.00364799 | 0.03613261 |
| TACC1      | 9448.3341  | 1.17917313 | 0.00365358 | 0.03616709 |
| OR56B1     | 17.1368906 | 1.66773431 | 0.00366255 | 0.03621429 |
| RSAD2      | 178.534989 | 1.32504547 | 0.00366257 | 0.03621429 |
| TRPC6      | 49.7332448 | 1.64736699 | 0.00366987 | 0.03626554 |
| ABHD6      | 250.415815 | 1.11308182 | 0.00367623 | 0.03630757 |
| PSMC5      | 1025.04058 | -0.6486327 | 0.00368101 | 0.03633382 |
| LPPR4      | 74.0959753 | 1.85971043 | 0.00371019 | 0.03660082 |
| ART5       | 17.7399535 | 1.90279493 | 0.00371501 | 0.03662733 |
| EVPL       | 7.14828727 | -1.8291975 | 0.00372303 | 0.0366853  |
| AGL        | 2440.20877 | 1.63153338 | 0.00373257 | 0.03671604 |
| METTL15    | 286.149225 | 0.71473696 | 0.00373097 | 0.03671604 |
| SNORA37    | 20.5534387 | 1.1437247  | 0.00373187 | 0.03671604 |
| IGLL5      | 20.9359594 | -2.0731731 | 0.00374679 | 0.03682272 |
| MCOLN3     | 18.5983689 | 1.86987994 | 0.00374826 | 0.03682272 |

|            |            |            |            |            |
|------------|------------|------------|------------|------------|
| RBMS3-AS3  | 2.9400584  | 2.08062711 | 0.00374985 | 0.03682272 |
| IRF6       | 8.35319556 | 1.62721311 | 0.00376209 | 0.03690913 |
| RASGRF2-AS | 3.97044565 | 2.1343417  | 0.00376295 | 0.03690913 |
| C21orf58   | 104.943208 | -1.0369664 | 0.00378057 | 0.03706077 |
| KIAA0100   | 6103.15338 | -0.3842984 | 0.00378535 | 0.03706533 |
| LOC1005055 | 83.9040428 | 1.05469506 | 0.00378527 | 0.03706533 |
| MGRN1      | 1253.76389 | -0.6093896 | 0.00380182 | 0.03720541 |
| CASC9      | 9.98535833 | -2.1725536 | 0.00382614 | 0.03738863 |
| MTMR4      | 1829.45308 | -0.6470389 | 0.00382708 | 0.03738863 |
| P DPR      | 2258.14585 | -0.8636432 | 0.00382512 | 0.03738863 |
| CENPO      | 260.930604 | -0.8667698 | 0.00383787 | 0.03747272 |
| CDK19      | 547.338553 | 0.72011962 | 0.00385963 | 0.0375996  |
| DNAJC4     | 357.027522 | -0.779287  | 0.00385634 | 0.0375996  |
| PRKCH      | 872.907512 | 1.0852631  | 0.00385383 | 0.0375996  |
| TERF2      | 467.844087 | -0.6453162 | 0.00385789 | 0.0375996  |
| NPHP3      | 256.505647 | 0.65594043 | 0.00386491 | 0.03761242 |
| PFKM       | 2900.09114 | -0.5706896 | 0.00386533 | 0.03761242 |
| LRRC37A3   | 293.36485  | 1.16067411 | 0.00386843 | 0.03762135 |
| UQCRHL     | 31.312598  | 0.93341598 | 0.00387263 | 0.03764082 |
| STAT5B     | 1507.1416  | 0.62965462 | 0.00387937 | 0.03768503 |
| TNRC6C     | 2277.39854 | -0.7345731 | 0.00388565 | 0.03772468 |
| CECR7      | 100.123495 | -2.0533805 | 0.00389395 | 0.03776253 |
| COLGALT1   | 1683.86294 | -0.6740655 | 0.00389256 | 0.03776253 |
| ZXDA       | 289.718498 | 0.60923545 | 0.00390525 | 0.03785069 |
| C6orf89    | 2705.28231 | 0.62622378 | 0.00391368 | 0.03791102 |
| FLJ33360   | 12.1843327 | 1.38012287 | 0.0039273  | 0.03794066 |
| HDHD2      | 714.656605 | 0.87179563 | 0.00392518 | 0.03794066 |
| HIPK3      | 4633.85838 | 0.62797719 | 0.00392491 | 0.03794066 |
| LINC00925  | 10.3893705 | 1.75810244 | 0.00392453 | 0.03794066 |
| NKD1       | 1645.70691 | 2.09785382 | 0.00392919 | 0.03794066 |
| SH3BGRL2   | 512.741829 | 1.51867319 | 0.00393    | 0.03794066 |
| MED14OS    | 4.30088293 | 1.78334835 | 0.00393792 | 0.03799575 |
| UBE2J1     | 989.985124 | 0.6062113  | 0.00394418 | 0.03803471 |
| WEE2-AS1   | 18.8206728 | 1.41381625 | 0.00395604 | 0.03810634 |
| ZNF607     | 218.794196 | 0.75201209 | 0.0039558  | 0.03810634 |
| ECI1       | 471.759283 | -0.8269462 | 0.0039605  | 0.03812786 |
| ECT2L      | 6.58555597 | 1.50231516 | 0.00396564 | 0.03815595 |
| VSTM2L     | 55.1833869 | -1.9370156 | 0.00398604 | 0.03833071 |
| CCDC148    | 55.3027131 | 1.6008758  | 0.0039967  | 0.03841173 |
| ABCA13     | 7.44385764 | -1.9954982 | 0.00400794 | 0.03847666 |
| COLGALT2   | 21.896129  | -1.7832415 | 0.00400656 | 0.03847666 |
| ZNF615     | 361.185038 | 0.75031859 | 0.00401471 | 0.03852011 |
| BRPF1      | 449.585829 | -0.5977531 | 0.00402058 | 0.03853339 |
| WRNIP1     | 837.918466 | 0.73117838 | 0.00401841 | 0.03853339 |
| GPC1       | 1561.01058 | -1.2921923 | 0.00404159 | 0.03869032 |
| MORC2      | 710.491776 | -0.8507482 | 0.00404372 | 0.03869032 |
| PCYT1A     | 576.968493 | -0.4709115 | 0.0040395  | 0.03869032 |
| SNX13      | 1690.38096 | 0.64016107 | 0.0040467  | 0.03869723 |
| RCAN2      | 209.481177 | 1.45848421 | 0.00405973 | 0.03878737 |
| SV2B       | 32.0561246 | -2.0422568 | 0.00406064 | 0.03878737 |

|           |            |            |            |            |
|-----------|------------|------------|------------|------------|
| TLK1      | 1355.49967 | -0.5722372 | 0.0040697  | 0.0388523  |
| RAP2C-AS1 | 91.3740034 | 1.02636113 | 0.00407762 | 0.03888461 |
| RPL13A    | 2172.16089 | 0.70574368 | 0.0040757  | 0.03888461 |
| CDAN1     | 374.469454 | 0.47460411 | 0.00409777 | 0.03899551 |
| MORC3     | 1328.03354 | 0.46842243 | 0.004099   | 0.03899551 |
| MYCT1     | 43.3789149 | 1.03686494 | 0.00410012 | 0.03899551 |
| PREX2     | 658.030261 | 1.57637392 | 0.00410061 | 0.03899551 |
| ZNF737    | 1048.47503 | 1.00549817 | 0.00409798 | 0.03899551 |
| SMAGP     | 186.550631 | -1.7197585 | 0.00410558 | 0.03902121 |
| FRMD3     | 75.6829353 | 1.32414739 | 0.00410939 | 0.03903579 |
| DFFA      | 361.994441 | 0.45171826 | 0.00412868 | 0.03919738 |
| BBOX1     | 2.10920626 | 2.09723632 | 0.00413514 | 0.03923695 |
| ATG9A     | 1049.64397 | -0.6824348 | 0.00416881 | 0.03953458 |
| SLC6A10P  | 4.94057111 | -2.132689  | 0.00417413 | 0.03956316 |
| RELN      | 594.213147 | -2.1615808 | 0.00417747 | 0.03957301 |
| CUBN      | 611.039141 | 0.93458816 | 0.00419891 | 0.03975418 |
| SNORA71A  | 58.9572636 | -1.4807612 | 0.00420955 | 0.03979703 |
| SUCLG1    | 748.629125 | -0.5446801 | 0.00420728 | 0.03979703 |
| USP18     | 78.5411983 | -0.9414419 | 0.00421039 | 0.03979703 |
| BCAS4     | 162.424893 | -1.693129  | 0.00423295 | 0.03998825 |
| FDPS      | 945.379083 | -0.6756711 | 0.00423972 | 0.04000815 |
| STRN4     | 1187.11573 | -0.4347182 | 0.00423873 | 0.04000815 |
| CAHM      | 15.9756763 | 1.42148834 | 0.0042434  | 0.04002082 |
| HIST1H4A  | 125.369009 | -1.0317319 | 0.00424812 | 0.04002138 |
| RSPH4A    | 19.5302361 | 1.16460069 | 0.00424661 | 0.04002138 |
| HOXC11    | 2.15767463 | -2.1320153 | 0.00427672 | 0.04024035 |
| IGJ       | 14.83067   | -1.8041293 | 0.00427637 | 0.04024035 |
| SNAPC4    | 319.604224 | -0.5466595 | 0.00427839 | 0.04024035 |
| RPIA      | 165.056633 | -0.7002634 | 0.00428098 | 0.04024258 |
| FAM221A   | 110.209197 | 1.1224071  | 0.00429104 | 0.04029304 |
| MLXIPL    | 79.8380697 | 1.63143891 | 0.00428976 | 0.04029304 |
| FRMPD4    | 2.02325919 | -2.149212  | 0.00430433 | 0.04039575 |
| BEND4     | 3.70234263 | -2.0497439 | 0.00430913 | 0.04041872 |
| TBP       | 209.990861 | 0.43980862 | 0.00431883 | 0.04048753 |
| CHL1      | 13.8471059 | -2.1224438 | 0.00432362 | 0.04051034 |
| ICK       | 809.35967  | 1.05515498 | 0.00432707 | 0.04051543 |
| SLC6A16   | 23.3523035 | -1.3300787 | 0.00432888 | 0.04051543 |
| APOB      | 204.832343 | 1.477353   | 0.00435365 | 0.04060846 |
| C16orf70  | 323.925678 | -0.4466553 | 0.00434606 | 0.04060846 |
| CENPK     | 63.7100189 | -1.5854161 | 0.0043514  | 0.04060846 |
| ENTPD8    | 19.7925913 | 1.91218362 | 0.00435724 | 0.04060846 |
| PUS7      | 287.93443  | -0.6990053 | 0.00435775 | 0.04060846 |
| SLC45A4   | 483.63168  | 0.86818563 | 0.00434454 | 0.04060846 |
| TMEM63C   | 3.23220188 | -1.8864711 | 0.00434792 | 0.04060846 |
| ZC3H12D   | 100.344828 | 1.27233658 | 0.00435624 | 0.04060846 |
| KIN       | 341.113273 | 0.41113963 | 0.00437313 | 0.04072967 |
| BNIP1     | 86.5581503 | 0.6446495  | 0.00437918 | 0.04073611 |
| FAM129B   | 2799.62534 | -1.0638562 | 0.00438061 | 0.04073611 |
| FNIP2     | 1264.21727 | 1.08895696 | 0.00438094 | 0.04073611 |
| ANKRD20A9 | 85.407314  | 2.08254715 | 0.0043843  | 0.04074526 |

|            |            |            |            |            |
|------------|------------|------------|------------|------------|
| FAM86C1    | 58.5468052 | -0.7397923 | 0.00439076 | 0.04078319 |
| ENPP4      | 913.268383 | 1.03003786 | 0.00440367 | 0.04088097 |
| SAMD11     | 358.070147 | 1.68650104 | 0.00442381 | 0.04104429 |
| SERPINH1   | 3217.18584 | -1.105236  | 0.00442604 | 0.04104429 |
| FTH1       | 12689.5344 | -0.9829089 | 0.00443274 | 0.04108418 |
| C9orf89    | 111.506118 | -0.7926037 | 0.00443978 | 0.04112728 |
| ZNF426     | 475.322463 | 0.69120621 | 0.00445587 | 0.04125408 |
| CYP2D7P    | 24.7024148 | 1.1748323  | 0.0044693  | 0.04135609 |
| GUCA1B     | 29.8848257 | 1.17862145 | 0.00447998 | 0.04143255 |
| CSNK1G3    | 1683.21948 | 0.84106155 | 0.00448403 | 0.04144771 |
| CERCAM     | 289.160169 | -1.208453  | 0.00449704 | 0.04150036 |
| E2F1       | 236.084812 | -1.3763223 | 0.0045016  | 0.04150036 |
| ME3        | 173.078291 | 1.01936469 | 0.00449671 | 0.04150036 |
| MSTN       | 24.588975  | 1.45755577 | 0.00450182 | 0.04150036 |
| VPS41      | 2476.06863 | 0.79989541 | 0.00449746 | 0.04150036 |
| FAM155B    | 17.310087  | -1.4555864 | 0.00451472 | 0.04153009 |
| FLAD1      | 357.716954 | -0.5496479 | 0.00451015 | 0.04153009 |
| IFT88      | 342.866835 | 0.8950582  | 0.00451157 | 0.04153009 |
| RPS8       | 8080.21016 | 0.60498982 | 0.00451429 | 0.04153009 |
| WDR76      | 136.760893 | -1.2040939 | 0.00452347 | 0.04158828 |
| SCN4A      | 24.9909335 | 1.78858786 | 0.00452633 | 0.04159232 |
| RPS6       | 10647.1058 | 0.52620584 | 0.00452909 | 0.04159541 |
| FOXS1      | 64.4122473 | -1.838797  | 0.00453658 | 0.04164194 |
| EPB41L4A-A | 185.743573 | 0.76536956 | 0.00455108 | 0.04173988 |
| PER1       | 3393.91828 | 0.984313   | 0.00455212 | 0.04173988 |
| AC093375.1 | 18.4861432 | -2.0520019 | 0.0045606  | 0.04179533 |
| HIST1H2BH  | 187.680421 | -1.625691  | 0.00457785 | 0.04193103 |
| CAMK4      | 14.920853  | -1.5812273 | 0.00460341 | 0.04214272 |
| ITGB3      | 166.616482 | 1.39977952 | 0.00460714 | 0.04215433 |
| FLJ31104   | 10.2769687 | 1.46895518 | 0.00461709 | 0.04222293 |
| BLOC1S6    | 1222.66218 | 0.5466414  | 0.00463958 | 0.04240592 |
| DUSP23     | 144.940047 | -0.8191707 | 0.00465008 | 0.04245669 |
| VCAM1      | 1212.85921 | 1.7664618  | 0.00464766 | 0.04245669 |
| COL8A2     | 1890.26693 | 1.71034058 | 0.00466326 | 0.0425469  |
| ZNF812     | 150.898431 | 1.86288774 | 0.00466491 | 0.0425469  |
| CCR6       | 10.318635  | 1.35506242 | 0.00467849 | 0.04264808 |
| TTC23L     | 10.9074329 | 1.33158774 | 0.00468661 | 0.04269939 |
| NUFIP2     | 5453.88287 | -0.4568484 | 0.00469029 | 0.04271021 |
| ZEB1       | 2215.55912 | 0.85414371 | 0.00469463 | 0.04272714 |
| RSPO3      | 532.871308 | 2.08622413 | 0.00471361 | 0.0428771  |
| BCAT1      | 3307.18267 | -1.6926873 | 0.00474159 | 0.04308594 |
| LRMP       | 114.542622 | 1.23207668 | 0.0047392  | 0.04308594 |
| MATR3      | 6676.38399 | 0.39128681 | 0.00476173 | 0.0432461  |
| TGFBR3L    | 2.87226701 | -2.0873565 | 0.00477096 | 0.04330696 |
| C11orf58   | 1883.93867 | 0.57027242 | 0.00478249 | 0.04336795 |
| MRAS       | 2829.41971 | -0.877302  | 0.00478273 | 0.04336795 |
| AQP5       | 36.6768939 | -2.1002321 | 0.00480616 | 0.04355738 |
| FOS        | 7655.23027 | 1.38186786 | 0.00481881 | 0.04360297 |
| LRRC49     | 288.12321  | 0.91692206 | 0.004817   | 0.04360297 |
| MACC1      | 73.132157  | 1.41332896 | 0.00481683 | 0.04360297 |

|            |            |            |            |            |
|------------|------------|------------|------------|------------|
| TAOK1      | 5276.08436 | -0.2744031 | 0.00483014 | 0.04365944 |
| ZNF862     | 844.418341 | -0.6913582 | 0.0048285  | 0.04365944 |
| PJA2       | 4814.54098 | 0.82097103 | 0.00484125 | 0.04373691 |
| ULK4P3     | 5.31658967 | -1.7727836 | 0.00486706 | 0.04394696 |
| BAI3       | 66.2352117 | 1.81026726 | 0.0048732  | 0.04395432 |
| IFI44L     | 325.568142 | 1.24501269 | 0.00487556 | 0.04395432 |
| ORC1       | 22.346957  | -1.250644  | 0.00487165 | 0.04395432 |
| LOC1001295 | 21.5243481 | 1.2030983  | 0.00488979 | 0.04405947 |
| CYSLTR2    | 15.0410136 | 1.70165159 | 0.00492493 | 0.04435283 |
| LRRC37A4P  | 438.766255 | -0.9877271 | 0.00493193 | 0.04439256 |
| CNOT11     | 609.067359 | -0.4746053 | 0.00493934 | 0.04443591 |
| GCSH       | 138.233839 | -0.8936798 | 0.00495165 | 0.04452334 |
| LOC401320  | 437.574065 | 0.8501202  | 0.0049679  | 0.04464605 |
| MXD3       | 119.22131  | -0.7404107 | 0.00497094 | 0.04465005 |
| TLR5       | 181.192904 | 1.30033317 | 0.00499744 | 0.04486453 |
| GID4       | 327.311861 | 0.50628466 | 0.00500147 | 0.04487731 |
| VTA1       | 567.277195 | 0.53845999 | 0.0050071  | 0.04490435 |
| DRD2       | 42.128529  | 2.10371561 | 0.0050149  | 0.04495078 |
| HMGB3      | 150.75317  | -0.9045823 | 0.00502649 | 0.04503115 |
| POMGNT2    | 430.532539 | 0.84048439 | 0.00503006 | 0.0450396  |
| C16orf89   | 1345.76007 | 1.53179658 | 0.00503496 | 0.04506002 |
| HIST1H2BD  | 671.454582 | -0.9210374 | 0.00505025 | 0.04507929 |
| PCYOX1L    | 205.853665 | -1.0853117 | 0.0050479  | 0.04507929 |
| PSIP1      | 1630.12949 | -1.0916292 | 0.00503976 | 0.04507929 |
| SOX11      | 309.266008 | -2.0842854 | 0.00504455 | 0.04507929 |
| ZNF490     | 521.398521 | 0.74099267 | 0.00504759 | 0.04507929 |
| H6PD       | 2086.79148 | 0.87753187 | 0.00505694 | 0.04511558 |
| CMPK2      | 129.806789 | 0.86814583 | 0.00507007 | 0.04518575 |
| MYO1E      | 919.81966  | 1.07886443 | 0.00506802 | 0.04518575 |
| RPL38      | 3369.66431 | -0.5300683 | 0.00509086 | 0.0453475  |
| PCMTD1     | 1926.58418 | 0.71596902 | 0.00509902 | 0.04539662 |
| SEPT9      | 2163.81629 | -0.8605254 | 0.00510397 | 0.04541717 |
| EPT1       | 808.773575 | -0.6586355 | 0.00511315 | 0.04547527 |
| TRAF4      | 678.940193 | -1.0316107 | 0.00511789 | 0.04549384 |
| RHBDD2     | 1476.50995 | 1.03667019 | 0.00513069 | 0.04558404 |
| GINS2      | 59.9129096 | -1.5745325 | 0.00514111 | 0.04565294 |
| ENDOG      | 116.372946 | -1.1786238 | 0.0051456  | 0.04566915 |
| ZNF552     | 115.542186 | -0.5135102 | 0.00515026 | 0.04568696 |
| BCL9       | 660.7233   | -0.7949513 | 0.00517057 | 0.04584342 |
| EFTUD1P1   | 37.5016689 | 1.80569751 | 0.00518125 | 0.04591435 |
| EML1       | 353.349714 | 1.08220993 | 0.00520536 | 0.04600522 |
| MYO10      | 2264.79294 | -1.2539026 | 0.00519971 | 0.04600522 |
| N4BP3      | 223.272259 | -1.4051061 | 0.00520539 | 0.04600522 |
| RAPSN      | 4.91728753 | 1.89729199 | 0.00520758 | 0.04600522 |
| SLC29A2    | 19.1215194 | -1.8227101 | 0.0051977  | 0.04600522 |
| SURF4      | 3919.96777 | -0.5827079 | 0.00520152 | 0.04600522 |
| HAS2       | 2.37117907 | -1.9164875 | 0.00521391 | 0.04603747 |
| CHMP6      | 312.042991 | -0.4657958 | 0.00521827 | 0.04605222 |
| GALNT1     | 2228.38408 | 0.79213105 | 0.00522359 | 0.04607548 |
| PFDN2      | 211.856458 | -0.7771034 | 0.0052277  | 0.04608785 |

|            |            |            |            |            |
|------------|------------|------------|------------|------------|
| PYCR1      | 134.519624 | -0.7628226 | 0.00523036 | 0.04608785 |
| LBH        | 1043.06307 | 1.273497   | 0.00524827 | 0.04622189 |
| ANKRD62    | 129.430409 | 2.09780434 | 0.00526598 | 0.04633661 |
| PDSS1      | 48.3351773 | -0.7610152 | 0.00526669 | 0.04633661 |
| TMEM133    | 86.6444093 | -1.4479397 | 0.00526947 | 0.04633729 |
| ELP4       | 292.373877 | 0.59109536 | 0.00527287 | 0.04634344 |
| C2orf61    | 7.53932057 | 1.84545007 | 0.00528028 | 0.04636722 |
| EPST11     | 192.519906 | 0.68815383 | 0.00528368 | 0.04636722 |
| SUPT3H     | 135.066408 | 0.94837299 | 0.00528123 | 0.04636722 |
| DAP3       | 1032.35425 | -0.5276989 | 0.00528811 | 0.04638241 |
| RICTOR     | 1578.958   | 0.60937959 | 0.00529188 | 0.04639178 |
| LRRC36     | 74.3459133 | -1.0423695 | 0.0053014  | 0.0464515  |
| SELK       | 282.028073 | 0.74465811 | 0.00531778 | 0.04657128 |
| BEND6      | 87.2142187 | 1.49227828 | 0.00532377 | 0.04657619 |
| SCUBE1     | 860.866124 | 1.95142737 | 0.00532288 | 0.04657619 |
| DENND6A    | 967.72952  | 0.67419284 | 0.00533479 | 0.04658241 |
| HOXA5      | 6.24651894 | -2.1006427 | 0.00532941 | 0.04658241 |
| SLC38A6    | 398.291944 | 0.79545165 | 0.00533534 | 0.04658241 |
| SUMO4      | 39.4745625 | 0.96770439 | 0.00533173 | 0.04658241 |
| ALKBH2     | 142.930538 | -0.7589414 | 0.00534164 | 0.04661378 |
| RNF26      | 467.982122 | -0.7156217 | 0.00535722 | 0.04672596 |
| PHF12      | 961.424239 | -0.5654783 | 0.00536476 | 0.04676793 |
| BCHE       | 26.861545  | -1.9783887 | 0.00537053 | 0.04679451 |
| LEPREL4    | 566.214942 | -1.1581335 | 0.00539138 | 0.04692856 |
| SPAG9      | 8288.69792 | 0.52138617 | 0.00538994 | 0.04692856 |
| HOXB13     | 29.4208686 | -2.0962844 | 0.00539563 | 0.04694174 |
| COL12A1    | 2319.94561 | 1.6923512  | 0.00541758 | 0.04710882 |
| CA4        | 12.7355678 | 2.0291102  | 0.00544077 | 0.04728653 |
| THAP3      | 113.409582 | 0.74446481 | 0.0054518  | 0.04735838 |
| GRIA2      | 2.95661982 | -2.0721533 | 0.00545626 | 0.04737315 |
| PLP2       | 800.076482 | -1.0672174 | 0.00546088 | 0.04738928 |
| PLSCR1     | 376.45402  | 0.66309521 | 0.00548139 | 0.04751921 |
| ZFAND5     | 3985.99769 | 0.92369751 | 0.00547906 | 0.04751921 |
| FBXO44     | 335.926385 | 0.59333738 | 0.0054875  | 0.0475349  |
| NRG2       | 13.4443537 | 1.5547485  | 0.00548874 | 0.0475349  |
| PSMD1      | 1717.8568  | -0.4642026 | 0.00549913 | 0.04760086 |
| PPFIA3     | 195.13519  | -1.3815763 | 0.00550809 | 0.04763041 |
| SMAD2      | 3599.95751 | 0.69848926 | 0.00550649 | 0.04763041 |
| LINC00189  | 90.7759037 | -1.5568705 | 0.00551746 | 0.04768743 |
| GALNT13    | 17.1924751 | -1.8628041 | 0.00552157 | 0.04769889 |
| CACFD1     | 281.266678 | -0.6714101 | 0.00553    | 0.04770613 |
| KIF15      | 90.7960562 | -1.1036811 | 0.00552744 | 0.04770613 |
| QRSL1      | 282.647728 | 0.77659324 | 0.00553074 | 0.04770613 |
| MARK4      | 613.767053 | -0.7373108 | 0.00554323 | 0.0477679  |
| SNORA76C   | 12.986939  | 1.80543186 | 0.00554347 | 0.0477679  |
| PLEC       | 23148.1292 | -0.7425971 | 0.00556453 | 0.04792529 |
| C16orf13   | 313.003794 | -0.5486982 | 0.00557109 | 0.04795778 |
| HDAC1      | 535.633469 | 0.71024275 | 0.00559596 | 0.04814772 |
| JHDM1D-AS1 | 57.0462787 | -0.9013648 | 0.00560158 | 0.04817193 |
| AGK        | 417.629068 | -0.4447448 | 0.00560539 | 0.04818056 |

|            |            |            |            |            |
|------------|------------|------------|------------|------------|
| LRRC24     | 45.3327738 | -0.9365957 | 0.00561302 | 0.04822196 |
| SAC3D1     | 84.9003854 | -0.8751327 | 0.00562201 | 0.04827501 |
| LOC1009966 | 54.9376297 | 2.0871057  | 0.00564171 | 0.04841995 |
| IQCK       | 100.631641 | 1.19213262 | 0.00565177 | 0.04848207 |
| CATSPER2P1 | 29.6099488 | -1.1285643 | 0.00565476 | 0.04848353 |
| CD40       | 132.429915 | 1.50705246 | 0.00566711 | 0.04854091 |
| CENPC      | 990.89715  | 0.5413656  | 0.00566467 | 0.04854091 |
| SMOX       | 410.583919 | 1.07159129 | 0.00567093 | 0.04854938 |
| CRNKL1     | 995.415879 | 0.53687097 | 0.00569991 | 0.04873585 |
| MMS19      | 900.284847 | -0.5212587 | 0.00570123 | 0.04873585 |
| SLC9A7P1   | 84.9143077 | 1.35943989 | 0.00569997 | 0.04873585 |
| PAK4       | 906.636898 | -1.108287  | 0.00570897 | 0.04877776 |
| FRMD4A     | 2801.42325 | -0.8943016 | 0.00571376 | 0.04879439 |
| GLI4       | 98.9593927 | -0.8030996 | 0.00573036 | 0.0488875  |
| PRKXP1     | 83.9186646 | 1.37718525 | 0.00572844 | 0.0488875  |
| LOC1019277 | 7.69634555 | 1.45346884 | 0.00574471 | 0.04898556 |
| CLASRP     | 603.994333 | -0.6697542 | 0.00574761 | 0.04898592 |
| WNT6       | 692.078208 | -1.3981773 | 0.0057587  | 0.04905613 |
| FAM167B    | 18.8618785 | 1.66622235 | 0.00576629 | 0.04909644 |
| PDE3B      | 295.522469 | 1.56413906 | 0.00579111 | 0.0492833  |
| SNORA74A   | 189.169508 | -1.1650116 | 0.0057965  | 0.04930474 |
| SMPD2      | 111.787966 | 0.89377109 | 0.00580119 | 0.04932016 |
| TBXA2R     | 24.900744  | 1.65637055 | 0.00580695 | 0.04934472 |
| ADAM10     | 2492.31148 | -0.5445537 | 0.00581322 | 0.04934915 |
| ADAMTSL3   | 7013.84282 | 1.60196311 | 0.0058131  | 0.04934915 |
| HN1L       | 1169.39027 | -0.7222917 | 0.00582011 | 0.04938316 |
| GRB7       | 18.0914051 | -1.6074095 | 0.00584558 | 0.0495503  |
| THBS1      | 5970.71565 | 1.78383123 | 0.0058431  | 0.0495503  |
| ZNF296     | 12.9736503 | -1.2364993 | 0.0058486  | 0.04955143 |
| FBXO32     | 1301.52474 | 1.61371529 | 0.00585436 | 0.04957575 |
| ZFP14      | 495.784189 | 0.68551826 | 0.00585839 | 0.04958544 |
| ATP9A      | 4744.41726 | 1.01002891 | 0.00586488 | 0.04959142 |
| NGAMT2     | 104.478324 | 0.81356085 | 0.00586405 | 0.04959142 |
| VPS26B     | 1265.54879 | -0.3512648 | 0.00587651 | 0.04966532 |
| EPB41L5    | 3138.29951 | -1.0893832 | 0.00588096 | 0.04967851 |
| FRA10AC1   | 251.420897 | 0.71621142 | 0.00588673 | 0.04968449 |
| HIST1H2BI  | 163.2453   | -1.1200238 | 0.00588746 | 0.04968449 |
| PIIF       | 602.021444 | -1.0240081 | 0.00589497 | 0.0497234  |
| SGCA       | 15.8199528 | 1.92876541 | 0.00590285 | 0.04976541 |
| NMRAL1     | 324.94477  | -0.7551004 | 0.00591343 | 0.04980574 |
| PGS1       | 594.852916 | -0.5880934 | 0.00591138 | 0.04980574 |
| MGARP      | 23.7645214 | 2.01328216 | 0.0059218  | 0.04985173 |
| STMN2      | 3.05622375 | -2.0618309 | 0.00593165 | 0.04991018 |
| DPY19L2P4  | 9.74041036 | 1.66161533 | 0.00595217 | 0.05005829 |
| DNAJC30    | 280.736746 | -0.6236367 | 0.00595694 | 0.05007387 |
| LOC1019281 | 240.952443 | -1.7291015 | 0.0059679  | 0.05014149 |
| AUP1       | 1215.10258 | -0.6967535 | 0.00598735 | 0.05025567 |
| FAM179A    | 132.628517 | -1.8768433 | 0.00598552 | 0.05025567 |
| SLC27A4    | 421.067562 | -0.5913264 | 0.00599164 | 0.05026714 |
| UBR2       | 2029.23013 | 0.7423653  | 0.00599829 | 0.05029828 |

|            |            |            |            |            |
|------------|------------|------------|------------|------------|
| FOXD2      | 1083.57445 | -0.8573815 | 0.00600826 | 0.05035728 |
| FAM127B    | 371.802428 | -0.8254654 | 0.00601168 | 0.0503614  |
| FER        | 831.547208 | 0.665951   | 0.00602547 | 0.05043446 |
| GIMAP1     | 135.852427 | 1.29633312 | 0.00603216 | 0.05043446 |
| PCP4       | 13.1051356 | -2.0597087 | 0.0060305  | 0.05043446 |
| TPM1       | 4622.34456 | 0.95825708 | 0.00603075 | 0.05043446 |
| C17orf80   | 696.792802 | -0.4300273 | 0.00604239 | 0.0504954  |
| SLC8A1     | 923.52921  | 1.27633524 | 0.00604626 | 0.05050318 |
| SASH1      | 1085.14875 | 1.32352004 | 0.00605306 | 0.05053541 |
| WNT11      | 9.44407768 | -1.7279219 | 0.00606471 | 0.05060802 |
| PI3        | 150.589396 | -2.0247213 | 0.00608418 | 0.05074589 |
| STAT5A     | 607.294332 | 0.68685743 | 0.00609619 | 0.05082134 |
| FIBIN      | 3374.77603 | 1.78371757 | 0.00612031 | 0.05099764 |
| OLAH       | 80.5255718 | -1.3014862 | 0.00613235 | 0.05107312 |
| ERAL1      | 407.021374 | -0.4824235 | 0.00614171 | 0.05110157 |
| LRRK2      | 1229.07082 | 0.92722706 | 0.00614088 | 0.05110157 |
| TPTE2P5    | 24.824826  | 1.26260943 | 0.00617238 | 0.05133185 |
| ABRACL     | 72.6295796 | 0.94979572 | 0.00617893 | 0.05134894 |
| HOXB7      | 8.7779432  | -1.9254573 | 0.00618042 | 0.05134894 |
| SNX19      | 3394.00828 | -0.4567259 | 0.00619574 | 0.05145131 |
| ADRBK2     | 466.059681 | 1.04034086 | 0.00622357 | 0.05165747 |
| FPGT       | 385.818874 | 0.805867   | 0.00623449 | 0.05172309 |
| EPHX3      | 24.5961    | 1.48786394 | 0.0062582  | 0.05189469 |
| TBC1D9     | 1738.14209 | -0.894682  | 0.00627743 | 0.05202899 |
| CSNK1E     | 813.632945 | 0.71051258 | 0.0062903  | 0.05211055 |
| CLEC2A     | 50.8388214 | -1.9467254 | 0.00630462 | 0.05215365 |
| LOC1001323 | 62.1936604 | 1.03275763 | 0.00630289 | 0.05215365 |
| PAPPA      | 1345.39712 | 1.86039654 | 0.00630207 | 0.05215365 |
| GLI2       | 921.17144  | -0.8436666 | 0.00630784 | 0.05215512 |
| GRIP2      | 160.416159 | -1.6569197 | 0.00631738 | 0.05220886 |
| RQCD1      | 897.226779 | -0.473756  | 0.00633697 | 0.05232973 |
| SNORA10    | 10.5108689 | -1.5558008 | 0.0063381  | 0.05232973 |
| FAM227B    | 54.2748493 | 0.81179254 | 0.00636399 | 0.05251824 |
| LOC283731  | 3.62668434 | -1.8884388 | 0.00637088 | 0.05254985 |
| RMI2       | 55.1186368 | -1.2336133 | 0.00642066 | 0.052935   |
| YIPF5      | 1178.99041 | 0.8545267  | 0.00642622 | 0.05295536 |
| PTTG1      | 87.0891452 | -1.4591522 | 0.00644009 | 0.05301929 |
| TMED3      | 1043.11691 | -0.8543441 | 0.00644015 | 0.05301929 |
| RAB31      | 1726.76241 | 1.12636358 | 0.00645016 | 0.05305837 |
| USP35      | 259.711928 | -0.6921081 | 0.00645108 | 0.05305837 |
| SGOL2      | 163.883471 | -0.9750399 | 0.00646028 | 0.05310857 |
| PPRC1      | 870.235954 | -0.885045  | 0.00648858 | 0.05331571 |
| SYTL3      | 70.6946832 | 1.07463886 | 0.00649509 | 0.05334365 |
| ALG14      | 88.8597293 | 0.83069437 | 0.00651133 | 0.05342593 |
| FOXRED2    | 381.061644 | -0.9351043 | 0.00650839 | 0.05342593 |
| ARHGEF28   | 1335.97084 | 1.36200722 | 0.00652257 | 0.05344147 |
| FZD2       | 1088.36644 | -0.7793314 | 0.0065206  | 0.05344147 |
| TM6SF1     | 224.370492 | 1.28360331 | 0.00652115 | 0.05344147 |
| CCDC134    | 61.6837973 | -0.5985774 | 0.00654893 | 0.05363183 |
| ADAT2      | 133.258312 | 0.99200497 | 0.00657013 | 0.05375616 |

|           |            |            |            |            |
|-----------|------------|------------|------------|------------|
| UBE2Q1    | 975.049209 | -0.3176319 | 0.00657037 | 0.05375616 |
| ITGB4     | 9234.21776 | -1.406245  | 0.0065775  | 0.05378886 |
| IBA57     | 549.246701 | -0.5634545 | 0.00659729 | 0.053925   |
| PREP      | 476.607025 | 0.51376093 | 0.0066225  | 0.05401075 |
| PXN-AS1   | 17.2033294 | -1.2429264 | 0.0066197  | 0.05401075 |
| SCNN1G    | 1.99952281 | -2.0237135 | 0.00661716 | 0.05401075 |
| WDR31     | 54.3316975 | 0.97532769 | 0.00662016 | 0.05401075 |
| ZNF713    | 49.2735757 | 0.89608046 | 0.00662351 | 0.05401075 |
| AGPAT4    | 372.29096  | 0.85585855 | 0.00663161 | 0.05402545 |
| LOC644936 | 3.87323012 | 1.78670077 | 0.00662911 | 0.05402545 |
| ISLR      | 15430.1438 | -1.5628182 | 0.00664053 | 0.05405198 |
| ITGB8     | 1726.83721 | 1.26574356 | 0.00664117 | 0.05405198 |
| SMC2      | 573.2246   | -0.7292619 | 0.00667108 | 0.05426969 |
| RUFY1     | 768.756107 | 0.4613224  | 0.00667577 | 0.05428215 |
| LMO7      | 1783.72467 | 0.82901637 | 0.00670777 | 0.05449251 |
| TBC1D19   | 433.377246 | 0.73709315 | 0.00670799 | 0.05449251 |
| EXOSC5    | 114.189437 | -0.4574989 | 0.00672604 | 0.05458481 |
| FAM106CP  | 39.9898218 | -2.0172126 | 0.00672675 | 0.05458481 |
| TMEM37    | 298.133335 | -1.2300772 | 0.00672889 | 0.05458481 |
| LARP1     | 5708.34192 | -0.6777393 | 0.00675655 | 0.05475744 |
| RWDD3     | 74.2248274 | 0.792337   | 0.00675463 | 0.05475744 |
| HIF3A     | 1822.16596 | -1.5204172 | 0.00676002 | 0.0547597  |
| NFKBIA    | 3094.88372 | 0.87927373 | 0.00677365 | 0.0548442  |
| BRD3      | 1232.74403 | -0.7363914 | 0.00680391 | 0.05501133 |
| CPB2-AS1  | 15.668177  | 1.46731078 | 0.00680288 | 0.05501133 |
| POLR3H    | 539.509861 | 0.58328283 | 0.00679849 | 0.05501133 |
| FLVCR2    | 447.784896 | -1.611659  | 0.00683206 | 0.05519441 |
| HIST1H2BG | 292.862191 | -1.2146257 | 0.00683298 | 0.05519441 |
| MOCS2     | 690.586911 | 0.60147634 | 0.00687055 | 0.05546268 |
| TCEB2     | 2133.25657 | -0.788403  | 0.00687265 | 0.05546268 |
| CHD9      | 6638.62703 | -0.3580639 | 0.0068834  | 0.05552326 |
| CA5B      | 257.726779 | 0.69624983 | 0.00689554 | 0.05559506 |
| CLEC7A    | 731.791066 | 1.37168634 | 0.00690874 | 0.05566641 |
| CYP4F12   | 86.748621  | 1.83041104 | 0.00691411 | 0.05566641 |
| HBB       | 1773.80747 | 1.59954789 | 0.00691279 | 0.05566641 |
| FXN       | 291.59151  | -0.6608763 | 0.0069337  | 0.0556935  |
| LINC00260 | 86.2465464 | -1.0422265 | 0.00693075 | 0.0556935  |
| SBF2      | 2136.21966 | 0.61022128 | 0.00692177 | 0.0556935  |
| TMEM106B  | 1750.94077 | 0.65460385 | 0.00693012 | 0.0556935  |
| WWP2      | 1226.2534  | 0.8085752  | 0.00693036 | 0.0556935  |
| DDX17     | 12337.6172 | 0.55480893 | 0.00693786 | 0.05570081 |
| TMEM44    | 157.247669 | -0.7934601 | 0.00694221 | 0.05570968 |
| CXCL16    | 748.082    | 0.92385938 | 0.00695266 | 0.05571775 |
| RHBDF1    | 1071.3008  | -0.6433893 | 0.00695295 | 0.05571775 |
| ZNF674    | 119.205164 | 0.73583427 | 0.00694984 | 0.05571775 |
| TMEM42    | 134.750902 | 0.94225551 | 0.00696747 | 0.05580801 |
| COX6C     | 782.48972  | -0.6326695 | 0.0070013  | 0.0560093  |
| GFER      | 179.505868 | -0.5093602 | 0.00700239 | 0.0560093  |
| TESK1     | 437.091936 | -0.7975699 | 0.00700224 | 0.0560093  |
| RFX2      | 201.368225 | 1.48390599 | 0.00701024 | 0.05603841 |

|            |            |            |            |            |
|------------|------------|------------|------------|------------|
| TMED1      | 308.514465 | 0.57665292 | 0.00701255 | 0.05603841 |
| CENPI      | 53.9935784 | -1.3389148 | 0.00702521 | 0.05611341 |
| AMZ2       | 740.845818 | -0.518292  | 0.00704698 | 0.05618269 |
| NRG4       | 58.1780388 | -1.9139156 | 0.00704675 | 0.05618269 |
| SEZ6       | 4.19834112 | -1.9210312 | 0.00704083 | 0.05618269 |
| SLC25A25   | 594.888015 | 1.21436111 | 0.00704289 | 0.05618269 |
| CNR1       | 25.868729  | -1.7373877 | 0.00706241 | 0.05621765 |
| KIRREL2    | 9.18516179 | -2.0287947 | 0.00705793 | 0.05621765 |
| PACRG      | 7.25587069 | 1.69172972 | 0.00706774 | 0.05621765 |
| SEPP1      | 4885.35171 | 1.0682398  | 0.00705942 | 0.05621765 |
| TNFAIP3    | 1682.74444 | 1.24479596 | 0.00706675 | 0.05621765 |
| PTCH2      | 44.538669  | 1.42257676 | 0.00708164 | 0.05630216 |
| BTBD9      | 648.661963 | 0.63504249 | 0.00708774 | 0.0563246  |
| CDK11A     | 53.6343103 | 1.32628932 | 0.00712211 | 0.05656328 |
| SLC24A5    | 18.7241982 | 1.94293532 | 0.00712437 | 0.05656328 |
| GUK1       | 1374.16767 | -0.5713268 | 0.00713972 | 0.05665892 |
| PLA1A      | 8.61523127 | 1.70443251 | 0.00714881 | 0.05670483 |
| LOC1019271 | 4.07264096 | 2.00341797 | 0.00716718 | 0.05680331 |
| SIN3A      | 2100.20812 | -0.764134  | 0.00716784 | 0.05680331 |
| ARHGDI3    | 34.2241546 | 1.60049338 | 0.00718256 | 0.05689371 |
| ASB2       | 6.44536415 | -1.703015  | 0.00719125 | 0.05690998 |
| KIAA1143   | 927.679556 | 0.72080088 | 0.00719123 | 0.05690998 |
| PIK3R1     | 5849.45022 | 1.45560837 | 0.00719582 | 0.05691997 |
| GEN1       | 328.539507 | -0.8569772 | 0.00720098 | 0.05693452 |
| RPL10A     | 5206.8919  | 0.52874394 | 0.00720707 | 0.05695645 |
| ESD        | 933.213434 | 0.55577521 | 0.00721469 | 0.05699044 |
| FAM160A2   | 673.876984 | 0.51606428 | 0.00721879 | 0.05699658 |
| DLGAP1-AS1 | 103.564078 | 0.98726102 | 0.00725518 | 0.05725755 |
| HIST1H2BN  | 168.813367 | -0.9025258 | 0.00731482 | 0.05764956 |
| MRPL54     | 197.970672 | 0.71626861 | 0.00731493 | 0.05764956 |
| RAD18      | 353.624039 | -0.6906736 | 0.00730883 | 0.05764956 |
| LPCAT2     | 668.187659 | 1.28640969 | 0.00733313 | 0.05776649 |
| CYP27B1    | 9.97164553 | -1.2353965 | 0.00734551 | 0.05782898 |
| DAF7       | 2756.73759 | -0.479215  | 0.0073478  | 0.05782898 |
| E2F6       | 221.627496 | -0.5893622 | 0.00735551 | 0.05785841 |
| LIMA1      | 2457.84072 | 0.77479478 | 0.00736165 | 0.05785841 |
| SNORA80A   | 30.172161  | 1.54601444 | 0.00735898 | 0.05785841 |
| LINC00294  | 266.579251 | 0.71814872 | 0.00737688 | 0.05795159 |
| SURF2      | 89.0467018 | -0.9288996 | 0.00738258 | 0.05796984 |
| DAPP1      | 56.93932   | 1.42280097 | 0.00739844 | 0.05804125 |
| IL13RA1    | 2099.93995 | 0.63901967 | 0.00739716 | 0.05804125 |
| NAALADL2   | 191.538964 | 0.74539246 | 0.00741289 | 0.05810145 |
| ST8SIA3    | 75.6270177 | -2.0039047 | 0.00741228 | 0.05810145 |
| FEZ2       | 856.948969 | 0.50516515 | 0.00742277 | 0.05815233 |
| LINC01184  | 299.012291 | 0.60319259 | 0.00743574 | 0.0582274  |
| REEP3      | 1883.63965 | 0.73979336 | 0.00744275 | 0.05825571 |
| KMT2D      | 4663.73407 | -0.5055928 | 0.00744774 | 0.05826061 |
| SLC19A3    | 3.32449847 | -1.7128771 | 0.00745016 | 0.05826061 |
| FAM192A    | 1147.07011 | -0.4477445 | 0.00746678 | 0.05836397 |
| CCDC132    | 596.116904 | 0.5295562  | 0.00748415 | 0.05844654 |

|            |            |            |            |            |
|------------|------------|------------|------------|------------|
| FAM71F1    | 4.59118151 | 1.78877525 | 0.00748279 | 0.05844654 |
| NAA40      | 533.677982 | -0.3992447 | 0.00749549 | 0.05848189 |
| VAX2       | 14.9424057 | -1.8739394 | 0.00749489 | 0.05848189 |
| DKFZp451B0 | 2.39850685 | 2.01714035 | 0.00750332 | 0.05851248 |
| FGL2       | 22752.0141 | 1.85022429 | 0.00750623 | 0.05851248 |
| MAN1A1     | 1245.55747 | 0.72536039 | 0.0075115  | 0.05852694 |
| COL6A4P1   | 3.80681575 | -1.8375506 | 0.0075236  | 0.05859468 |
| GBA2       | 1459.72247 | -0.6822743 | 0.0075297  | 0.05861559 |
| CPA2       | 2.72092164 | -1.9433244 | 0.00754354 | 0.05869092 |
| HIST2H2AB  | 157.056031 | -0.9068056 | 0.00754622 | 0.05869092 |
| PCCB       | 539.489388 | -0.7572983 | 0.00755076 | 0.05869961 |
| CACTIN-AS1 | 5.18873734 | 1.87964533 | 0.00756609 | 0.05871246 |
| MRV11      | 177.478778 | 0.97554987 | 0.00756089 | 0.05871246 |
| SNORA68    | 96.3066557 | 1.38722567 | 0.00756427 | 0.05871246 |
| ZNF445     | 1359.4412  | 0.5963025  | 0.00756233 | 0.05871246 |
| HYI        | 257.233144 | 0.76386361 | 0.00757619 | 0.05876423 |
| CCDC175    | 20.7857755 | 2.00418629 | 0.0075823  | 0.05878222 |
| H1FX-AS1   | 70.4250349 | 0.95309253 | 0.00758873 | 0.05878222 |
| STEAP4     | 250.119007 | 1.77765935 | 0.00758878 | 0.05878222 |
| C21orf33   | 1062.59497 | -0.3218612 | 0.00762091 | 0.05898804 |
| LAMTOR2    | 252.916438 | -0.5519996 | 0.00762222 | 0.05898804 |
| RELL2      | 72.0384442 | -1.0701105 | 0.00764506 | 0.05913812 |
| KCNH8      | 2.71411029 | -1.9948275 | 0.00765589 | 0.05919519 |
| SHC4       | 434.380846 | 1.83937792 | 0.00766789 | 0.05926126 |
| KCNH4      | 3.08702219 | -1.8450014 | 0.00769664 | 0.05942996 |
| LINC01366  | 6.08688679 | -1.8509896 | 0.00769391 | 0.05942996 |
| C16orf54   | 28.9974274 | 1.31282753 | 0.0077207  | 0.05957675 |
| C6orf62    | 2450.60961 | 0.56766298 | 0.00772259 | 0.05957675 |
| NBPF9      | 77.039643  | 0.96306461 | 0.00773608 | 0.059654   |
| GSTM5      | 244.45456  | 2.00899323 | 0.0077464  | 0.05970679 |
| SEC14L5    | 8.55750648 | -1.7130203 | 0.00776348 | 0.05981152 |
| PPP1R14A   | 10.7435077 | -1.3799238 | 0.00777797 | 0.05989629 |
| RNF8       | 273.060287 | 0.52533554 | 0.00778724 | 0.05994076 |
| SACM1L     | 1009.34853 | 0.56816228 | 0.00780464 | 0.06004781 |
| ARHGAP44   | 188.937952 | 1.63151895 | 0.00781359 | 0.06007268 |
| DTWD1      | 363.398332 | 0.5568022  | 0.00781487 | 0.06007268 |
| KLHL33     | 3.33573774 | 1.9181053  | 0.00783178 | 0.06017567 |
| PTGES      | 189.773296 | -1.4821399 | 0.00783881 | 0.06020273 |
| CLYBL      | 99.6385714 | -0.6901352 | 0.00784938 | 0.0602031  |
| DCAF4      | 159.989308 | -0.7022731 | 0.00784457 | 0.0602031  |
| IL11RA     | 540.038322 | 1.45562496 | 0.00784725 | 0.0602031  |
| HMOX2      | 552.998437 | -0.4665219 | 0.0078547  | 0.06021704 |
| SCD        | 2187.35226 | -1.5334769 | 0.00786661 | 0.06027096 |
| TMEM132E   | 6.60662739 | -1.3897985 | 0.00786876 | 0.06027096 |
| NEXN       | 160.54599  | 1.49499659 | 0.00789829 | 0.06047016 |
| KANK4      | 27.4115955 | -1.6820445 | 0.00790549 | 0.06049831 |
| XKR9       | 27.5097518 | -1.5542951 | 0.00791557 | 0.06052148 |
| ZFX        | 2272.60444 | 0.57538581 | 0.00791429 | 0.06052148 |
| PTMA       | 5336.07218 | -0.6511711 | 0.00794159 | 0.06068158 |
| SYTL5      | 316.706429 | -1.8829876 | 0.00794358 | 0.06068158 |

|           |            |            |            |            |
|-----------|------------|------------|------------|------------|
| ACO2      | 1482.79945 | -0.7707903 | 0.00796127 | 0.0607897  |
| ZNF322    | 319.8622   | 0.73022003 | 0.007967   | 0.06080639 |
| BHMT2     | 711.460475 | 1.62983607 | 0.00798635 | 0.06088451 |
| UBAP2L    | 2522.10571 | -0.5604717 | 0.00798788 | 0.06088451 |
| ZNF564    | 435.116941 | 0.73161021 | 0.00798756 | 0.06088451 |
| ECH1      | 830.377243 | -0.7049156 | 0.0080244  | 0.06110863 |
| ZNF487    | 64.3926573 | 1.23315709 | 0.00802233 | 0.06110863 |
| CCDC144CP | 358.330654 | -1.8117598 | 0.00803832 | 0.06117216 |
| EFCAB6    | 62.5885848 | 0.98286252 | 0.008047   | 0.06117216 |
| FOXA1     | 5.71477992 | -1.9970284 | 0.00804306 | 0.06117216 |
| PKDCC     | 1812.60139 | -1.3972093 | 0.00804641 | 0.06117216 |
| TTC18     | 177.090553 | 0.90951237 | 0.0080572  | 0.06122261 |
| COX19     | 236.033435 | 0.71590897 | 0.00807145 | 0.06128194 |
| KIFAP3    | 996.341189 | 0.63940974 | 0.00807215 | 0.06128194 |
| THBS2     | 1103.66408 | -1.5779264 | 0.00808119 | 0.06132345 |
| DRAM2     | 393.464312 | 0.64966738 | 0.00811159 | 0.06139128 |
| GORASP1   | 631.109409 | 0.56476526 | 0.00810906 | 0.06139128 |
| ITGB1BP1  | 463.507262 | -0.5704942 | 0.00810312 | 0.06139128 |
| RER1      | 1096.10671 | 0.49672211 | 0.00811121 | 0.06139128 |
| SLC25A44  | 589.378796 | -0.6585727 | 0.00810333 | 0.06139128 |
| TMEM231   | 149.646936 | 1.09870775 | 0.0081061  | 0.06139128 |
| SWAP70    | 1957.38026 | 0.69504653 | 0.00811898 | 0.06142011 |
| SET       | 4675.92742 | -0.5261989 | 0.0081231  | 0.06142421 |
| LPAR6     | 1089.98902 | 0.73221266 | 0.00813793 | 0.06150927 |
| B3GALT5   | 6.1425304  | -1.8215477 | 0.00814305 | 0.06152086 |
| CHRNE     | 24.8956806 | 1.65187091 | 0.00815639 | 0.06156748 |
| PELO      | 681.755208 | 0.68614572 | 0.00815473 | 0.06156748 |
| CEACAM21  | 23.1959393 | 1.29695355 | 0.00817229 | 0.06160625 |
| HDLBP     | 11992.7354 | -0.6041916 | 0.00817111 | 0.06160625 |
| SEPT8     | 1523.56038 | 0.7700163  | 0.00816957 | 0.06160625 |
| NT5C2     | 2487.63752 | 0.77254072 | 0.00817754 | 0.06161872 |
| PSMD11    | 1162.0521  | -0.4816604 | 0.00818177 | 0.06162358 |
| PIBF1     | 652.116626 | 0.47861276 | 0.00818596 | 0.06162807 |
| OGDHL     | 646.9937   | -1.5865305 | 0.0081921  | 0.06164729 |
| SLED1     | 31.9584795 | 1.43202361 | 0.00820163 | 0.06169193 |
| A2M       | 7620.76385 | 0.94680295 | 0.00820743 | 0.06170853 |
| ANKRD20A4 | 13.5972    | 1.9509734  | 0.0082132  | 0.06172485 |
| AMD1      | 1392.88563 | 0.56009598 | 0.00822056 | 0.06172611 |
| OTOA      | 7.20024615 | 1.64007428 | 0.00821821 | 0.06172611 |
| CYP4F24P  | 28.60532   | 1.87912045 | 0.00822532 | 0.06173485 |
| CACNA1C   | 699.787033 | 1.0429302  | 0.00825427 | 0.06192504 |
| SORT1     | 3537.17238 | 0.63465856 | 0.00826198 | 0.06195585 |
| ADRM1     | 869.427273 | -0.7283198 | 0.00827579 | 0.06203231 |
| ABCC9     | 3847.83412 | 1.88224533 | 0.0082928  | 0.06213268 |
| KIT       | 324.157563 | 1.40915667 | 0.00829888 | 0.06215109 |
| ATP2A2    | 4778.08038 | -0.6303822 | 0.00830359 | 0.06215926 |
| ANAPC16   | 1075.9279  | 0.51426812 | 0.0083217  | 0.06225118 |
| WDR4      | 233.744129 | -0.6801156 | 0.00832313 | 0.06225118 |
| KLRC3     | 6.12798566 | -1.4826812 | 0.00832957 | 0.06227224 |
| EIF3D     | 1399.55452 | 0.6057608  | 0.00834354 | 0.06232692 |

|            |            |            |            |            |
|------------|------------|------------|------------|------------|
| ZNF618     | 1440.42419 | -0.79426   | 0.00834415 | 0.06232692 |
| DYNC2H1    | 1628.56783 | 0.62915413 | 0.00835338 | 0.06234316 |
| ZNF197     | 696.45656  | 0.53923817 | 0.00835358 | 0.06234316 |
| MRPL45     | 419.505754 | -0.3949992 | 0.00837081 | 0.06244454 |
| GTF2H1     | 720.715871 | 0.68900254 | 0.00839286 | 0.06255468 |
| OGG1       | 317.305232 | -0.5755739 | 0.00839182 | 0.06255468 |
| TIAM1      | 975.464799 | -1.3209952 | 0.00840416 | 0.06261173 |
| LOC1019272 | 18.9888751 | 1.98700789 | 0.00841394 | 0.06265067 |
| SETD7      | 4504.19054 | 0.5733295  | 0.00841669 | 0.06265067 |
| CMPK1      | 1487.28476 | 0.70385519 | 0.00843355 | 0.06272176 |
| LOC1001309 | 31.0562142 | 1.08965847 | 0.00843204 | 0.06272176 |
| B4GALT6    | 267.382125 | 1.28433177 | 0.00844345 | 0.0627644  |
| IGSF1      | 56.5474237 | -1.8499845 | 0.00845391 | 0.0627644  |
| SH3RF1     | 1056.77569 | 0.68913212 | 0.0084539  | 0.0627644  |
| USHBP1     | 25.3738418 | 1.52150252 | 0.00845389 | 0.0627644  |
| CLEC10A    | 48.7716075 | 1.85245904 | 0.00847482 | 0.0628653  |
| GABRR2     | 11.4760626 | 1.51479784 | 0.0084717  | 0.0628653  |
| MANBA      | 677.703101 | 0.45539222 | 0.00848661 | 0.06292557 |
| ZFPM2      | 124.529917 | -1.4660205 | 0.00853618 | 0.0632658  |
| LINC01061  | 111.037849 | -1.0298206 | 0.00854859 | 0.06329216 |
| NAA60      | 822.045479 | -0.6695557 | 0.00854819 | 0.06329216 |
| TMEM30B    | 3949.63526 | 1.55649718 | 0.0085508  | 0.06329216 |
| DAAM1      | 538.615969 | 1.11003203 | 0.00856778 | 0.06336319 |
| LEPREL1    | 300.521522 | 1.67705072 | 0.00856501 | 0.06336319 |
| LTB4R      | 305.657401 | -1.0187078 | 0.00858204 | 0.06343102 |
| ZNF134     | 499.662729 | 0.41107264 | 0.00858434 | 0.06343102 |
| RACGAP1    | 359.939631 | -1.0929003 | 0.00859805 | 0.06350493 |
| SMC6       | 688.994634 | -0.4209072 | 0.00860215 | 0.06350791 |
| STXBP5-AS1 | 11.4319823 | 1.44836394 | 0.00860694 | 0.06351594 |
| DLD        | 1392.39456 | -0.6163039 | 0.00861421 | 0.06351637 |
| DSCR9      | 16.8803889 | -1.0510479 | 0.00861525 | 0.06351637 |
| FLT1       | 988.804813 | 1.46690867 | 0.0086181  | 0.06351637 |
| NR1H3      | 278.96387  | -0.5694198 | 0.00863148 | 0.06358768 |
| GPC6       | 8439.21989 | 0.90427539 | 0.00866418 | 0.06380123 |
| CAMKK2     | 801.376173 | -0.5166421 | 0.00867435 | 0.06384869 |
| GIMAP8     | 384.072947 | 1.13666541 | 0.00868461 | 0.06389682 |
| ARRB1      | 3169.66576 | -0.8065003 | 0.00870079 | 0.06395057 |
| GPATCH4    | 212.993316 | -0.7765638 | 0.00869583 | 0.06395057 |
| RRN3P3     | 125.48331  | -0.6481057 | 0.0087061  | 0.06395057 |
| TBC1D20    | 1058.11656 | 0.66029423 | 0.00870682 | 0.06395057 |
| MPHOSPH8   | 1433.87623 | 0.50933976 | 0.00871917 | 0.06399604 |
| RAC3       | 84.8001599 | -1.4843184 | 0.00872046 | 0.06399604 |
| GSTM3      | 794.279728 | 1.52646042 | 0.00874622 | 0.06413026 |
| SKA1       | 17.9698748 | -1.4235268 | 0.00874444 | 0.06413026 |
| DPF3       | 15.1549725 | 1.44129155 | 0.00875883 | 0.06419527 |
| ZNF554     | 123.033765 | 0.70787368 | 0.00878547 | 0.06436306 |
| CDC14B     | 601.457715 | 1.1372044  | 0.0087968  | 0.06437144 |
| CXCL11     | 21.5384146 | 1.6355419  | 0.00879787 | 0.06437144 |
| TNFSF13    | 241.606578 | 0.75129188 | 0.00879545 | 0.06437144 |
| EMR3       | 7.98024507 | 1.83435283 | 0.00882136 | 0.06451584 |

|            |            |            |            |            |
|------------|------------|------------|------------|------------|
| SERPINB10  | 9.93247409 | -1.9712693 | 0.00883182 | 0.0645648  |
| ZC3H8      | 114.360403 | -0.6364538 | 0.00884768 | 0.06465321 |
| AP5Z1      | 457.772266 | 0.5411064  | 0.00885164 | 0.06465466 |
| DCST2      | 10.220257  | -1.1615115 | 0.00886228 | 0.06470485 |
| PHC2       | 1131.04021 | 0.91020721 | 0.00888781 | 0.06486365 |
| TBC1D26    | 2.4782848  | 1.84045253 | 0.00889362 | 0.06487842 |
| ZNF503-AS1 | 7.06931014 | 1.94454342 | 0.00891701 | 0.06502141 |
| AGAP1      | 1103.95155 | -0.7888124 | 0.00892902 | 0.06508134 |
| TMEM11     | 176.861992 | -0.6035973 | 0.00894219 | 0.0651497  |
| GPNMB      | 1705.94082 | 1.43408468 | 0.00896539 | 0.06529105 |
| MBLAC1     | 17.0003695 | 1.14674417 | 0.00897453 | 0.06532988 |
| LOC1005060 | 126.018112 | 1.04158651 | 0.00900822 | 0.06553899 |
| USP47      | 2030.02167 | 0.53920113 | 0.0090109  | 0.06553899 |
| ZNF407     | 1065.76714 | 0.44151026 | 0.00902918 | 0.06564413 |
| SSNA1      | 232.591184 | -0.4659128 | 0.00905171 | 0.06578011 |
| FZD7       | 2596.90415 | 1.46118605 | 0.00905684 | 0.06578953 |
| TMEM9      | 987.303798 | -0.5278781 | 0.00907493 | 0.06589308 |
| RPS15AP10  | 36.9763756 | 0.88204228 | 0.00908474 | 0.06593638 |
| MIER1      | 1013.98754 | 0.62517316 | 0.00911513 | 0.06612898 |
| AEBP1      | 6549.80346 | 1.60066701 | 0.00915701 | 0.06640473 |
| ACTR6      | 231.411342 | 0.52837567 | 0.00917223 | 0.06648707 |
| LINC00987  | 28.9957754 | 1.54267195 | 0.00918759 | 0.06657025 |
| C9orf106   | 28.0935146 | 1.30463845 | 0.00919551 | 0.06659953 |
| CHST7      | 102.63651  | 1.4758169  | 0.009208   | 0.06666191 |
| RFX7       | 1006.17471 | -0.6443104 | 0.00921785 | 0.06670505 |
| NKAIN4     | 70.4389217 | -1.8371148 | 0.00922997 | 0.06676458 |
| SYNGR2     | 873.258163 | -0.9930452 | 0.0092386  | 0.06679886 |
| TRAIIP     | 21.7506853 | -0.8798329 | 0.00924406 | 0.06681025 |
| EPCAM      | 4.62925693 | -1.7422811 | 0.00926162 | 0.06690894 |
| SNORA72    | 6.05630542 | 1.74315655 | 0.00927043 | 0.06694443 |
| CNOT3      | 530.458919 | -0.6329934 | 0.00929141 | 0.06706769 |
| TRAPPC2    | 286.767673 | 0.64504509 | 0.00929727 | 0.06708184 |
| ANGPTL1    | 8.65055371 | -1.9029205 | 0.00931439 | 0.06716517 |
| TCP1       | 1519.98515 | 0.55769191 | 0.00931665 | 0.06716517 |
| SLC37A4    | 260.377074 | -0.5342745 | 0.00934495 | 0.06734095 |
| FHL1       | 2542.63634 | 1.47817462 | 0.00936145 | 0.06743154 |
| SPON1      | 120.054772 | 1.69313443 | 0.00936562 | 0.06743323 |
| COLEC10    | 4.70988509 | 1.8613549  | 0.00937291 | 0.06745743 |
| RHOT2      | 865.500935 | -0.5775498 | 0.00941196 | 0.06768172 |
| SMAD5      | 2876.99763 | 0.6159544  | 0.00940924 | 0.06768172 |
| KLHL7      | 538.365977 | 0.69277263 | 0.00942716 | 0.06774004 |
| RANBP10    | 528.79362  | -0.4077282 | 0.00942796 | 0.06774004 |
| CHTF18     | 208.862337 | -0.8278267 | 0.00947319 | 0.06802478 |
| ZNF366     | 48.0946597 | 1.31592111 | 0.00947552 | 0.06802478 |
| ESYT3      | 201.685167 | 1.37491394 | 0.00948556 | 0.06803993 |
| NDFIP1     | 2707.00616 | 0.73064131 | 0.00948339 | 0.06803993 |
| C10orf35   | 22.3661661 | -1.3131854 | 0.00949989 | 0.06811427 |
| NME9       | 6.53143497 | 1.93831064 | 0.0095309  | 0.06830808 |
| ZRANB2     | 1574.52616 | 0.55649795 | 0.00954601 | 0.06838781 |
| AGAP11     | 357.588613 | 1.44733319 | 0.00956638 | 0.06845436 |

|            |            |            |            |            |
|------------|------------|------------|------------|------------|
| PHF11      | 207.018906 | 0.70748474 | 0.00956726 | 0.06845436 |
| RAPGEF6    | 1455.5127  | 0.64089181 | 0.00955982 | 0.06845436 |
| POGLUT1    | 408.579816 | -0.4597409 | 0.00959434 | 0.06861955 |
| ALDH1A2    | 2575.78023 | -1.9232867 | 0.00961847 | 0.06872162 |
| SETDB1     | 1021.87937 | -0.5509722 | 0.00962063 | 0.06872162 |
| TYMS       | 356.787532 | -1.161168  | 0.00961878 | 0.06872162 |
| SFRP1      | 2081.21187 | 1.84053477 | 0.00962561 | 0.06872861 |
| SFXN5      | 345.395042 | -0.8284039 | 0.00964643 | 0.06884864 |
| ARHGAP42   | 373.979664 | -1.3112134 | 0.00965177 | 0.06885811 |
| SLC25A10   | 78.0576193 | -1.1260475 | 0.00965851 | 0.06887757 |
| DHX15      | 2182.00349 | -0.3622549 | 0.00966943 | 0.06887965 |
| KLHDC1     | 202.320483 | 0.91241879 | 0.0096663  | 0.06887965 |
| PIGL       | 142.203524 | 0.68062242 | 0.00967084 | 0.06887965 |
| PCSK7      | 1028.24398 | -0.5283827 | 0.00967713 | 0.068888   |
| SNCAIP     | 126.944387 | 1.22894314 | 0.00968004 | 0.068888   |
| DUOX2      | 46.2789374 | 1.8782949  | 0.0097121  | 0.06908754 |
| FLI1       | 517.243581 | 0.93457395 | 0.00972105 | 0.06912255 |
| PRAME      | 217.908461 | -1.8117397 | 0.00973508 | 0.06919368 |
| ZNF529     | 764.597477 | 0.49621854 | 0.00973986 | 0.06919895 |
| EFCAB7     | 145.178044 | 0.92612003 | 0.009745   | 0.06920686 |
| MYLK2      | 3.03257897 | -1.8884672 | 0.00975178 | 0.06922635 |
| LRRC3      | 63.7861426 | -1.3102918 | 0.00975594 | 0.06922727 |
| ATP5C1     | 1450.97507 | -0.4867029 | 0.00976619 | 0.06927133 |
| CFL1       | 4378.57729 | -0.5408725 | 0.0097724  | 0.06928679 |
| TPRXL      | 8.88426379 | -1.5861188 | 0.009788   | 0.06936873 |
| FGD5P1     | 70.5173286 | -1.6094175 | 0.00980188 | 0.0694384  |
| THSD1      | 87.1930108 | 0.93925721 | 0.00980784 | 0.06945195 |
| TOMM5      | 457.254019 | -0.7991904 | 0.00983965 | 0.0696485  |
| TPM3       | 3694.35836 | -0.4263558 | 0.00984716 | 0.06967291 |
| C6orf57    | 45.7137926 | 0.91234021 | 0.0098741  | 0.06980951 |
| WDR35      | 851.74731  | 0.48020339 | 0.0098746  | 0.06980951 |
| ASIC1      | 54.3097494 | -1.2956843 | 0.00990969 | 0.06991635 |
| COL9A2     | 96.6759369 | 1.66258583 | 0.00990642 | 0.06991635 |
| PARD6G-AS1 | 23.9237749 | 1.11115862 | 0.00990146 | 0.06991635 |
| S100A10    | 4647.2852  | -0.914473  | 0.00991008 | 0.06991635 |
| UGGT1      | 3477.84003 | -0.3824076 | 0.00989884 | 0.06991635 |
| MTR        | 2692.02438 | -0.590797  | 0.00994165 | 0.07011029 |
| DPY19L1P1  | 60.5956366 | 1.17957793 | 0.00995682 | 0.07018842 |
| RAI1       | 957.281853 | -0.5656857 | 0.00999405 | 0.07042198 |
| TMED7      | 2158.13855 | 0.57008424 | 0.01000743 | 0.07048727 |
| H19        | 10737.2027 | -1.9427607 | 0.01004423 | 0.07071749 |
| BST1       | 202.87752  | 1.56963457 | 0.01004913 | 0.07072294 |
| RANBP2     | 6021.04218 | 0.36495517 | 0.01006754 | 0.07081622 |
| TRIM27     | 2.30187108 | -1.8864537 | 0.01007353 | 0.07081622 |
| ZNF396     | 41.2500396 | 0.92614487 | 0.01007476 | 0.07081622 |
| ZSCAN26    | 367.595188 | 0.79923449 | 0.01008377 | 0.07085053 |
| MUC1       | 258.34957  | -1.2103563 | 0.01009177 | 0.07087772 |
| GEMIN6     | 87.6024504 | -0.6340254 | 0.01012287 | 0.07106709 |
| GUSB       | 702.093138 | -0.7238316 | 0.0101511  | 0.07117794 |
| ST3GAL4    | 752.818507 | -0.8784393 | 0.01014563 | 0.07117794 |

|            |            |            |            |            |
|------------|------------|------------|------------|------------|
| WDR45B     | 1228.11298 | -0.4098596 | 0.01014752 | 0.07117794 |
| USP32P1    | 507.176851 | -1.7979277 | 0.01018349 | 0.0713759  |
| LOC115110  | 15.8581663 | 1.43168957 | 0.01019595 | 0.07143407 |
| FBXL19     | 407.310068 | -0.5963665 | 0.01021212 | 0.07151818 |
| CCDC144NL  | 3.2129158  | 1.93750918 | 0.01023496 | 0.07164886 |
| ADSS       | 780.806595 | -0.5526489 | 0.01024062 | 0.07165926 |
| COL7A1     | 381.033903 | -0.9959902 | 0.0102528  | 0.07168608 |
| PKP2       | 4151.34433 | 1.28079264 | 0.01025269 | 0.07168608 |
| GLTSCR1    | 247.699465 | -1.0532436 | 0.01028824 | 0.07187934 |
| IL20RB     | 34.0647643 | -1.1417293 | 0.01028882 | 0.07187934 |
| SHMT2      | 1257.24954 | -1.0219832 | 0.0102975  | 0.07191073 |
| RGS18      | 113.493151 | 1.33999893 | 0.01035463 | 0.07228028 |
| IL18RAP    | 6.80238924 | 1.71926193 | 0.01037361 | 0.07238331 |
| MARS       | 1341.65454 | -0.4929535 | 0.01040192 | 0.07252195 |
| NID1       | 5266.82491 | -1.1470546 | 0.01039907 | 0.07252195 |
| KIAA0355   | 1340.79466 | 0.47700495 | 0.01045225 | 0.0728366  |
| UVRAG      | 612.487824 | 0.49458023 | 0.01045554 | 0.0728366  |
| UNC80      | 139.539175 | -1.6271767 | 0.01048169 | 0.07298916 |
| SNORA27    | 11.8550608 | 1.1138567  | 0.01048717 | 0.07299767 |
| CNTD2      | 7.60593482 | -1.5424562 | 0.01051991 | 0.07317496 |
| SNORA52    | 28.5645995 | 1.27063869 | 0.01052117 | 0.07317496 |
| LINC00884  | 3.65533838 | 1.74483531 | 0.01054406 | 0.07330451 |
| TMEM232    | 44.770693  | 1.21573305 | 0.01056014 | 0.07338657 |
| ANKRD1     | 50.6319352 | -1.9287816 | 0.01057804 | 0.0734812  |
| KCNMB1     | 39.8533712 | 1.35273541 | 0.0105899  | 0.07353382 |
| FN3K       | 161.35135  | -1.0677735 | 0.01064342 | 0.07387558 |
| GPR176     | 163.801685 | 1.28529806 | 0.01064859 | 0.0738816  |
| CD300LF    | 19.4060419 | 1.45353636 | 0.01068116 | 0.07407763 |
| NARS       | 1732.9917  | 0.46518522 | 0.01070386 | 0.07420509 |
| RBPM52     | 263.497129 | -1.3334241 | 0.01071808 | 0.07427368 |
| PRAF2      | 276.93547  | -0.7510403 | 0.01072435 | 0.07428714 |
| CHODL      | 48.562793  | 1.8026375  | 0.01075111 | 0.0744424  |
| SLC41A2    | 782.898058 | 1.25036666 | 0.01076469 | 0.07450644 |
| SHF        | 244.323112 | 1.4864288  | 0.01077105 | 0.07452036 |
| ASB14      | 2.24576783 | 1.87074888 | 0.01079759 | 0.07467388 |
| AAED1      | 124.701804 | 0.63002244 | 0.0108275  | 0.07485058 |
| CSMD3      | 3.54582853 | -1.8791224 | 0.01085027 | 0.07497783 |
| ABCC13     | 6.83482329 | -1.9045583 | 0.01086759 | 0.07504797 |
| PHPT1      | 1045.0231  | -0.5581308 | 0.01086917 | 0.07504797 |
| PPM1D      | 557.868208 | -0.5470715 | 0.0108863  | 0.07511835 |
| STIP1      | 1163.21822 | -0.5587853 | 0.01088811 | 0.07511835 |
| COL27A1    | 342.462255 | -0.9934954 | 0.01089866 | 0.07516092 |
| CACHD1     | 865.706583 | 1.2930526  | 0.01092025 | 0.07527956 |
| DDX39A     | 429.357322 | -0.7515026 | 0.0109317  | 0.07532824 |
| SEMA4G     | 125.199491 | -1.1165108 | 0.01093829 | 0.07534342 |
| ZNF571     | 113.78242  | 0.810556   | 0.01095791 | 0.07544825 |
| SLC14A2    | 13.7611618 | 1.72934564 | 0.01096265 | 0.07545066 |
| ENTPD3-AS1 | 27.1851327 | 1.25229991 | 0.01099003 | 0.07559907 |
| IGF2-AS    | 69.9562034 | -1.5549011 | 0.01099303 | 0.07559907 |
| SERPINF2   | 47.3232129 | 1.37248327 | 0.01102287 | 0.07577395 |

|            |            |            |            |            |
|------------|------------|------------|------------|------------|
| ZNF205-AS1 | 7.23676928 | 1.30952912 | 0.01104749 | 0.07591283 |
| GOLGA1     | 728.829179 | -0.4589393 | 0.01110866 | 0.07630258 |
| APBB2      | 5009.6499  | 0.98219611 | 0.01117525 | 0.076653   |
| FAM182A    | 6.86994956 | 1.89212847 | 0.01117617 | 0.076653   |
| RSF1       | 1662.76032 | -0.3178454 | 0.01117494 | 0.076653   |
| UQCRFS1    | 692.805088 | -0.5388565 | 0.01117754 | 0.076653   |
| LRP4       | 1214.71602 | 1.19216826 | 0.01118377 | 0.0766651  |
| LASP1      | 4362.17402 | -0.3816403 | 0.01122262 | 0.07680873 |
| RIN1       | 64.8563962 | -1.2570147 | 0.01121678 | 0.07680873 |
| SLC1A5     | 625.641044 | -1.3448954 | 0.01121933 | 0.07680873 |
| ZNF561     | 787.50549  | 0.63140063 | 0.01122164 | 0.07680873 |
| LACE1      | 74.4107401 | 0.7112509  | 0.01125015 | 0.07696644 |
| T          | 5.19080408 | -1.8837022 | 0.01125926 | 0.0769981  |
| ZNF462     | 1438.73821 | -0.5310749 | 0.01126435 | 0.07700224 |
| DRG2       | 387.578944 | 0.61242872 | 0.01127899 | 0.07701026 |
| PGLS       | 511.893974 | -0.4497267 | 0.01127536 | 0.07701026 |
| PRKCA      | 3499.67935 | -1.0453103 | 0.01127651 | 0.07701026 |
| RABL3      | 338.687964 | 0.48778888 | 0.01131794 | 0.0772273  |
| SNAI3      | 29.2719704 | 1.61602879 | 0.01132877 | 0.0772273  |
| TMEM185B   | 756.089023 | -0.5783878 | 0.0113238  | 0.0772273  |
| ZNF319     | 256.877792 | -0.5730873 | 0.01132682 | 0.0772273  |
| ZNF331     | 769.922842 | 1.05396587 | 0.01134525 | 0.07730895 |
| ZC3HAV1L   | 283.139117 | -0.7387501 | 0.01135876 | 0.07737031 |
| SCMH1      | 594.902631 | 0.61345442 | 0.01137913 | 0.07747829 |
| YTHDF1     | 1086.97496 | -0.6767239 | 0.01139023 | 0.07752312 |
| NOL4L      | 904.854345 | -0.9229433 | 0.01140251 | 0.07757594 |
| CLDN11     | 7608.14268 | -1.593297  | 0.01141738 | 0.07764633 |
| FLJ45513   | 39.3716118 | 1.1808917  | 0.01142191 | 0.07764635 |
| TRG-AS1    | 12.7302089 | 1.4614937  | 0.01146424 | 0.07790331 |
| RAD51C     | 175.131977 | -0.67591   | 0.01148417 | 0.07800782 |
| NUP214     | 1738.80548 | -0.4340968 | 0.01149587 | 0.07804174 |
| PGAP1      | 1778.3961  | -0.8390569 | 0.01149826 | 0.07804174 |
| RIC3       | 555.509609 | 0.66824551 | 0.01152105 | 0.07816552 |
| FAR1       | 1954.82331 | 0.58245108 | 0.01153034 | 0.07817273 |
| RPL34      | 3780.51608 | 0.61298328 | 0.01153122 | 0.07817273 |
| SLFNL1     | 7.63134039 | 1.52134694 | 0.01159091 | 0.0785464  |
| CLDN9      | 4.74766426 | -1.6250438 | 0.01160852 | 0.07863467 |
| SLC39A4    | 61.1813325 | -1.3278805 | 0.01162657 | 0.07872586 |
| BHLHE41    | 748.534257 | 1.20521239 | 0.01164543 | 0.07876784 |
| CNTNAP2    | 11.8453614 | -1.5446666 | 0.01165571 | 0.07876784 |
| GPS1       | 1303.07698 | -0.4238308 | 0.01165256 | 0.07876784 |
| KCNE4      | 1246.77641 | 1.23806884 | 0.01164787 | 0.07876784 |
| NADK2      | 827.686718 | 0.79491015 | 0.01164037 | 0.07876784 |
| EEF2       | 39579.9684 | 0.54131326 | 0.01167677 | 0.07881042 |
| GIMAP6     | 395.545371 | 1.06241146 | 0.01167271 | 0.07881042 |
| GLIS2      | 1403.47331 | -0.968532  | 0.01168038 | 0.07881042 |
| ITGAV      | 5031.1878  | 0.579264   | 0.01167316 | 0.07881042 |
| KCNG2      | 8.66385743 | -1.8964535 | 0.01170889 | 0.07897175 |
| FAM184A    | 44.414164  | 1.33519257 | 0.01171932 | 0.07901104 |
| HNMT       | 960.256651 | 0.98252234 | 0.01174929 | 0.07918201 |

|             |            |            |            |            |
|-------------|------------|------------|------------|------------|
| FCER1A      | 30.1137743 | 1.74032923 | 0.01175703 | 0.07920308 |
| ABHD3       | 255.579426 | 1.21777098 | 0.01178484 | 0.07935633 |
| C10orf82    | 13.630791  | 1.85273255 | 0.01179827 | 0.07935633 |
| SLC44A3     | 58.6761052 | 1.0495101  | 0.01179716 | 0.07935633 |
| TRAF7       | 1236.47001 | -0.6294168 | 0.01179181 | 0.07935633 |
| ANKHD1      | 162.386007 | 0.66892888 | 0.01180461 | 0.07936786 |
| C10orf131   | 8.94172676 | 1.55711146 | 0.01183944 | 0.07950861 |
| MAATS1      | 64.9935251 | 1.32631102 | 0.01183186 | 0.07950861 |
| MCM4        | 791.977083 | -0.9484687 | 0.01183621 | 0.07950861 |
| TPCN1       | 1607.39401 | -0.5577558 | 0.0118578  | 0.07960078 |
| FMNL3       | 2198.69732 | 0.93875153 | 0.01188821 | 0.07976381 |
| NME1        | 362.486719 | -0.7397702 | 0.01189138 | 0.07976381 |
| LHPP        | 138.111968 | 0.88537864 | 0.01191493 | 0.07989056 |
| GREM2       | 24.491314  | 1.89619654 | 0.01192293 | 0.07991295 |
| LINC00167   | 4.3895501  | 1.39315178 | 0.01195428 | 0.08006053 |
| RAB11FIP1   | 1758.67228 | -0.9572497 | 0.01195117 | 0.08006053 |
| FAM8A1      | 1761.46559 | 0.7765869  | 0.01196132 | 0.08007646 |
| SLC52A3     | 47.2230301 | -1.8675503 | 0.01199887 | 0.08029655 |
| TWIST2      | 98.4163057 | -1.4246735 | 0.01200447 | 0.08030271 |
| CRYM        | 14.7010581 | -1.7768592 | 0.01202461 | 0.08037477 |
| MTG1        | 357.01368  | -0.5744737 | 0.01202231 | 0.08037477 |
| DDX58       | 592.472701 | 0.79219975 | 0.0120475  | 0.08049642 |
| KCMF1       | 951.447544 | -0.3473681 | 0.01206958 | 0.08055704 |
| LOC440300   | 154.509066 | 1.05705863 | 0.01207065 | 0.08055704 |
| PCGF6       | 114.33862  | 0.71291486 | 0.01206642 | 0.08055704 |
| COX4I1      | 2368.79132 | -0.6136874 | 0.01209322 | 0.08067633 |
| ANKRD36BP1  | 14.6589471 | -1.5361188 | 0.01212993 | 0.08088973 |
| ATXN2       | 1514.77047 | -0.5491427 | 0.01214384 | 0.08095106 |
| DYNLRB2     | 2.99097255 | 1.76303444 | 0.01216109 | 0.08102512 |
| EMC1        | 1282.9721  | 0.5110346  | 0.01216439 | 0.08102512 |
| FGD1        | 387.285793 | -0.6393395 | 0.01217055 | 0.08103474 |
| JPH2        | 86.3300855 | -1.4675645 | 0.01218577 | 0.08109186 |
| SLC16A1-AS1 | 64.3766486 | 0.87528746 | 0.01218858 | 0.08109186 |
| CPD         | 6816.6299  | -0.7159762 | 0.01222397 | 0.0812958  |
| TMEM107     | 156.482856 | 0.88529949 | 0.01223169 | 0.08131563 |
| LINC00857   | 45.2717159 | -1.4696813 | 0.01226229 | 0.08148747 |
| PGR         | 2141.91369 | 1.71816178 | 0.01232812 | 0.08189327 |
| GPR171      | 8.60630535 | 1.53711003 | 0.01235945 | 0.08206964 |
| ALDOA       | 11566.136  | -0.8688393 | 0.01238333 | 0.0821964  |
| SEC14L6     | 32.8471655 | 1.804709   | 0.01239102 | 0.08221564 |
| LOC1005071  | 17.3440072 | 1.42318761 | 0.01240419 | 0.08223343 |
| ST8SIA1     | 247.658761 | 1.86611088 | 0.01241286 | 0.08223343 |
| THAP9-AS1   | 482.809192 | -0.515233  | 0.01240675 | 0.08223343 |
| WDR83OS     | 749.142473 | 0.567327   | 0.01240951 | 0.08223343 |
| BMI1        | 72.8999874 | 0.70478697 | 0.01243633 | 0.08226187 |
| CASP8AP2    | 730.30833  | 0.52585843 | 0.01242392 | 0.08226187 |
| PAQR6       | 108.501565 | -1.3921062 | 0.01242755 | 0.08226187 |
| SDHC        | 890.87713  | -0.5691411 | 0.01243618 | 0.08226187 |
| EXOC3L1     | 19.4539286 | -1.0394509 | 0.01244954 | 0.08227557 |
| PXK         | 321.013855 | 0.84270266 | 0.01245278 | 0.08227557 |

|            |            |            |            |            |
|------------|------------|------------|------------|------------|
| ST14       | 58.5631808 | -1.2958331 | 0.01244464 | 0.08227557 |
| F3         | 5066.03716 | 1.34093721 | 0.01247067 | 0.08236068 |
| FAM19A2    | 39.6150477 | 0.89542935 | 0.01247696 | 0.08236068 |
| TMEM132D   | 110.632298 | -1.8773816 | 0.01248005 | 0.08236068 |
| MTF2       | 420.847297 | 0.64801322 | 0.01248658 | 0.08236725 |
| ST8SIA4    | 436.42303  | 0.80496977 | 0.01249344 | 0.08236725 |
| VAMP1      | 249.192593 | 0.63750839 | 0.01249545 | 0.08236725 |
| GPR64      | 300.403038 | -1.6662181 | 0.01251795 | 0.08242063 |
| NCL        | 5382.81214 | -0.5956052 | 0.01251457 | 0.08242063 |
| TOP1       | 2152.89966 | -0.559939  | 0.01251069 | 0.08242063 |
| GPRASP1    | 1386.23289 | 0.92902417 | 0.0125461  | 0.08254833 |
| PPM1K      | 682.515791 | 0.76089093 | 0.01254696 | 0.08254833 |
| IDH3A      | 940.977248 | -0.9327844 | 0.01257206 | 0.08268177 |
| CAMLG      | 593.232125 | 0.6612785  | 0.01258269 | 0.08268832 |
| GS1-259H13 | 26.6951239 | 1.17552002 | 0.01257841 | 0.08268832 |
| SAMHD1     | 1315.57983 | 0.92377645 | 0.01261746 | 0.08288511 |
| CHML       | 532.465149 | -0.6092914 | 0.012624   | 0.0828963  |
| RSP02      | 34.4255861 | -1.8521695 | 0.01264159 | 0.08298008 |
| FASTKD1    | 315.012849 | -0.6117206 | 0.01265448 | 0.08300122 |
| ID3        | 1554.29154 | 0.65527343 | 0.01265392 | 0.08300122 |
| COX6B2     | 4.29163777 | -1.6185642 | 0.01266622 | 0.08301477 |
| LOC145783  | 172.815446 | -0.6591797 | 0.01266512 | 0.08301477 |
| DLGAP4     | 1417.68046 | -0.8121452 | 0.012676   | 0.08304716 |
| C18orf61   | 37.2606043 | 1.88062526 | 0.0127044  | 0.08313804 |
| MLC1       | 5.89523734 | -1.6750666 | 0.01269591 | 0.08313804 |
| TACC2      | 985.179082 | -0.8045493 | 0.01270073 | 0.08313804 |
| PON2       | 1135.02943 | -0.5581722 | 0.01270966 | 0.08314077 |
| CIZ1       | 1210.00236 | -0.5008195 | 0.01272862 | 0.08323307 |
| HTR1D      | 15.1636745 | -1.6440094 | 0.01274963 | 0.08333871 |
| LOC442497  | 3.11541959 | 1.81753967 | 0.01275649 | 0.08334294 |
| PIWIL2     | 21.7797708 | 1.4664652  | 0.01275999 | 0.08334294 |
| LOC728752  | 18.44171   | 1.04573858 | 0.01278909 | 0.08350123 |
| GUSBP1     | 347.611459 | 0.559385   | 0.012815   | 0.08362564 |
| LOC1026064 | 21.6365625 | 1.07994635 | 0.01281824 | 0.08362564 |
| MAOB       | 26.9234308 | -1.6558942 | 0.01282276 | 0.08362564 |
| LOC1001304 | 12.4894744 | 1.26875046 | 0.01284117 | 0.08371392 |
| AGO4       | 871.285923 | 0.65223632 | 0.01286398 | 0.08383073 |
| TSPYL2     | 2608.06923 | 0.89334534 | 0.01290171 | 0.08404473 |
| AS3MT      | 8.81247888 | 1.33278774 | 0.01291143 | 0.08406886 |
| CHTOP      | 754.481952 | -0.3875759 | 0.01291521 | 0.08406886 |
| TCEAL1     | 349.024275 | 0.82694603 | 0.01292257 | 0.08408488 |
| FAM76A     | 201.51956  | 0.83401419 | 0.01294004 | 0.08416667 |
| C1GALT1    | 583.112785 | 0.9466836  | 0.01294786 | 0.08417958 |
| SUSD2      | 244.231955 | -1.7694356 | 0.01295184 | 0.08417958 |
| TMPO-AS1   | 49.067487  | -0.8015635 | 0.01298898 | 0.08438906 |
| CCND1      | 22751.1851 | -1.0766407 | 0.01300661 | 0.08447158 |
| RNF32      | 9.95793103 | -1.0920307 | 0.01301205 | 0.08447499 |
| DENND4B    | 1189.4186  | -0.5793959 | 0.01301783 | 0.08448053 |
| ZNF7       | 376.897777 | -0.5558643 | 0.01303891 | 0.08458534 |
| GPSM2      | 224.745362 | -1.3567214 | 0.01306458 | 0.08470861 |

|            |            |            |            |            |
|------------|------------|------------|------------|------------|
| P2RY14     | 95.9404077 | 1.69464866 | 0.01306778 | 0.08470861 |
| RBM38      | 118.99023  | -0.8461386 | 0.01308196 | 0.0847476  |
| RPL7       | 8443.94547 | 0.58789959 | 0.01308438 | 0.0847476  |
| SYN1       | 34.7525129 | -1.1098594 | 0.0130886  | 0.0847476  |
| HIST1H2AG  | 255.162468 | -1.2935568 | 0.01309393 | 0.08475014 |
| FAM180B    | 73.8928919 | 1.84749517 | 0.01310149 | 0.0847671  |
| KCNN3      | 186.686389 | 1.30348369 | 0.01311757 | 0.08483911 |
| PCDHGA12   | 725.168666 | 1.29932648 | 0.01312618 | 0.08486288 |
| AFTPH      | 869.80851  | 0.36275326 | 0.01313877 | 0.08488381 |
| GABRE      | 2630.99348 | -0.9932298 | 0.01313931 | 0.08488381 |
| LIMS2      | 501.98017  | -1.0163114 | 0.01314912 | 0.08491524 |
| MIR143HG   | 48.861001  | 1.46979458 | 0.01317273 | 0.0850357  |
| TIE1       | 143.775835 | 1.28223109 | 0.01319152 | 0.085125   |
| AHCY       | 1627.72533 | -0.7470747 | 0.01321299 | 0.08523146 |
| ZNF442     | 135.013638 | 1.35221226 | 0.01322114 | 0.085252   |
| RDM1       | 3.29128647 | -1.7035083 | 0.01323453 | 0.08530633 |
| TCEB3      | 925.735769 | 0.46303397 | 0.01324524 | 0.08534329 |
| SCN1B      | 262.830952 | 0.9375866  | 0.01325823 | 0.08539493 |
| TNNT2      | 1734.30876 | -1.3706612 | 0.01327462 | 0.08546847 |
| CDK12      | 2185.33667 | -0.3161308 | 0.01329596 | 0.08557372 |
| C15orf61   | 54.4096137 | -0.8301987 | 0.01330422 | 0.08558676 |
| OR9A4      | 12.9612677 | 1.60411835 | 0.01330796 | 0.08558676 |
| RNASEH1-AS | 63.7902795 | -0.9874018 | 0.01332897 | 0.0856898  |
| ZAK        | 1284.79105 | 0.77730678 | 0.01335091 | 0.0857987  |
| LYRM4      | 228.984028 | 0.73385609 | 0.01335642 | 0.085802   |
| LRIG1      | 1347.16246 | -0.860089  | 0.01339108 | 0.08599247 |
| NPY6R      | 29.5863237 | 1.8628773  | 0.01340447 | 0.08604625 |
| CYP1B1-AS1 | 42.2315578 | 1.58639085 | 0.01341911 | 0.08610802 |
| FKBP5      | 8976.31718 | 1.09265575 | 0.01344086 | 0.08617029 |
| FXYP1      | 454.511342 | 1.23734823 | 0.01344387 | 0.08617029 |
| PPP5C      | 851.366584 | -0.4560603 | 0.01343479 | 0.08617029 |
| TMEM255A   | 31.5448855 | -1.7625907 | 0.01346684 | 0.0862531  |
| ZNF423     | 1810.10195 | -0.7490569 | 0.01346361 | 0.0862531  |
| FLJ34503   | 14.9021221 | 1.77120477 | 0.01348512 | 0.08627359 |
| HIST1H2AB  | 66.8129292 | -1.0124375 | 0.01348386 | 0.08627359 |
| TIMM8B     | 348.89786  | -0.5607825 | 0.01347603 | 0.08627359 |
| MFN1       | 967.719379 | -0.2231113 | 0.01350525 | 0.08637019 |
| PYCR1      | 707.567385 | -1.2785933 | 0.01353243 | 0.08651179 |
| IFFO2      | 150.257781 | 1.00750754 | 0.01353808 | 0.08651571 |
| ELTD1      | 180.9101   | 1.38700056 | 0.01356752 | 0.08663929 |
| FAM120A    | 4433.02412 | -0.4044342 | 0.01356668 | 0.08663929 |
| CDHR2      | 3.52956483 | -1.3891138 | 0.01358348 | 0.08667676 |
| SLC16A1    | 2479.31882 | 1.52761823 | 0.01357949 | 0.08667676 |
| CASP2      | 661.049895 | -0.6260626 | 0.01363691 | 0.08695106 |
| HDDC2      | 521.32563  | 0.40323487 | 0.01364639 | 0.08695106 |
| TLR8       | 76.3917225 | 1.21127351 | 0.01363528 | 0.08695106 |
| ZMYM6NB    | 199.446305 | 0.7400392  | 0.01364673 | 0.08695106 |
| RAMP1      | 31.4835777 | -1.6069701 | 0.01368789 | 0.08718093 |
| S100A11    | 3067.14225 | -0.7513039 | 0.01369583 | 0.08719916 |
| NFASC      | 191.22798  | -1.5087686 | 0.01373147 | 0.08738931 |

|            |            |            |            |            |
|------------|------------|------------|------------|------------|
| TSNAXIP1   | 46.9759526 | 1.02222062 | 0.01373588 | 0.08738931 |
| TIPRL      | 768.863194 | -0.3105456 | 0.0137457  | 0.08741942 |
| KDM1B      | 1047.83793 | 1.2697235  | 0.01377529 | 0.0875751  |
| CHI3L1     | 34.6361934 | -1.842029  | 0.01378792 | 0.08762297 |
| HNRNPUL1   | 3416.70867 | -0.3804514 | 0.01380349 | 0.08768944 |
| CHCHD7     | 180.164068 | 0.61577859 | 0.0138379  | 0.08771606 |
| DCLK3      | 2.11080874 | 1.82560219 | 0.01382438 | 0.08771606 |
| KDELC1     | 250.270813 | -0.8863153 | 0.013813   | 0.08771606 |
| LOC1005066 | 143.852102 | 0.69835476 | 0.0138339  | 0.08771606 |
| MFSD4      | 40.3042932 | -1.0534003 | 0.01383938 | 0.08771606 |
| RIMS2      | 5.31752978 | -1.8043747 | 0.01384345 | 0.08771606 |
| TBC1D17    | 617.160091 | -0.4194385 | 0.01383601 | 0.08771606 |
| HGF        | 131.326586 | 1.39843147 | 0.01385744 | 0.08773147 |
| MARCKS     | 4785.81304 | 0.81343835 | 0.01385985 | 0.08773147 |
| SNORA53    | 918.351007 | -1.0189993 | 0.01386121 | 0.08773147 |
| ABHD17B    | 315.721704 | -0.430179  | 0.01390854 | 0.08774486 |
| AGBL4      | 7.66666987 | 1.369489   | 0.01390961 | 0.08774486 |
| BRINP3     | 74.6869152 | -1.6957511 | 0.0138951  | 0.08774486 |
| C16orf86   | 43.9054727 | 1.45615127 | 0.01390958 | 0.08774486 |
| DLG1       | 1683.60919 | -0.2840911 | 0.013897   | 0.08774486 |
| HMGA1      | 394.12784  | -1.1804006 | 0.01387514 | 0.08774486 |
| ITPKA      | 9.2495015  | -1.7119335 | 0.0139186  | 0.08774486 |
| PATL1      | 790.938978 | -0.6522433 | 0.01391956 | 0.08774486 |
| SCARF2     | 596.127502 | -1.0930297 | 0.01391075 | 0.08774486 |
| TUBBP5     | 3.67441524 | -1.8555333 | 0.01389508 | 0.08774486 |
| ZNF69      | 107.465685 | 1.46673685 | 0.01390828 | 0.08774486 |
| RNF214     | 450.761992 | -0.4781178 | 0.01399388 | 0.08818095 |
| GPM6A      | 16.8665676 | -1.580705  | 0.01400966 | 0.08824801 |
| CHKB       | 33.9014179 | 0.78768241 | 0.01401679 | 0.08826053 |
| ZMYND12    | 35.6565802 | 1.11423165 | 0.0140474  | 0.08842085 |
| ETAA1      | 441.34506  | -0.4525188 | 0.01407829 | 0.08858281 |
| GORASP2    | 1195.13236 | -0.5479981 | 0.01410974 | 0.08873333 |
| JMJD1C     | 4906.87414 | 0.43926109 | 0.01411255 | 0.08873333 |
| RAB40AL    | 25.6260794 | 0.97240762 | 0.0141356  | 0.08884567 |
| CAPN3      | 257.084962 | 0.72891758 | 0.01414818 | 0.08886146 |
| CTSS       | 1272.47703 | 0.87903652 | 0.01415364 | 0.08886146 |
| PCM1       | 3905.87314 | 0.56992293 | 0.01414876 | 0.08886146 |
| SLC25A33   | 58.3369267 | 1.04087023 | 0.01417362 | 0.08895437 |
| TTC36      | 3.51108271 | -1.4367273 | 0.01418213 | 0.08897525 |
| GNA11      | 2279.18019 | 0.49611844 | 0.01419441 | 0.08898722 |
| TBC1D13    | 704.382142 | -0.3267121 | 0.01419009 | 0.08898722 |
| MBOAT1     | 745.919654 | 1.22456469 | 0.01420109 | 0.08899662 |
| EDC3       | 646.440415 | -0.7164176 | 0.01420641 | 0.08899749 |
| MASTL      | 273.370145 | -0.4473171 | 0.01422065 | 0.08905414 |
| C8orf82    | 189.427644 | -0.6735217 | 0.01423586 | 0.08909487 |
| CREB3L4    | 107.307002 | -1.0187208 | 0.01425269 | 0.08909487 |
| SNRPG      | 304.414104 | -0.6461942 | 0.01424601 | 0.08909487 |
| TAF15      | 920.172138 | -0.7043941 | 0.0142531  | 0.08909487 |
| ZNF391     | 70.9586254 | 0.86018496 | 0.01425161 | 0.08909487 |
| ATP2A3     | 105.146767 | 0.97126217 | 0.01427206 | 0.08916053 |

|            |            |            |            |            |
|------------|------------|------------|------------|------------|
| ELAC1      | 129.819679 | 0.63508315 | 0.014274   | 0.08916053 |
| CMTR1      | 991.426007 | 0.4848056  | 0.01427936 | 0.08916158 |
| FAM132A    | 28.8393157 | 1.66502908 | 0.01433205 | 0.08945805 |
| WFIKN1     | 3.55572494 | -1.5436628 | 0.01434961 | 0.08953509 |
| SLC7A5P1   | 21.1507242 | -1.5004333 | 0.01441036 | 0.08988146 |
| PLXND1     | 3437.92348 | -0.7791945 | 0.01444959 | 0.09009233 |
| PSMD2      | 2506.4311  | -0.381374  | 0.01445466 | 0.09009233 |
| ZNRF1      | 173.690619 | -0.7895664 | 0.01448572 | 0.09025316 |
| BCL2       | 970.551194 | 1.2800116  | 0.01450975 | 0.09035478 |
| CERS5      | 726.569488 | -0.6432023 | 0.01451256 | 0.09035478 |
| AFF3       | 1306.80488 | -1.3167907 | 0.01454481 | 0.09037799 |
| BAIAP2-AS1 | 317.947531 | 0.62392944 | 0.01459487 | 0.09037799 |
| CDC123     | 608.343908 | -0.4889287 | 0.01458939 | 0.09037799 |
| CKAP2      | 628.39096  | -0.9213349 | 0.01455231 | 0.09037799 |
| DLGAP1-AS2 | 16.6752907 | 1.06452804 | 0.01460677 | 0.09037799 |
| DZANK1     | 41.4978801 | 1.03159815 | 0.01453758 | 0.09037799 |
| EID2B      | 80.7535469 | 0.85878509 | 0.01461162 | 0.09037799 |
| FGGY       | 232.227891 | 0.68892082 | 0.01461079 | 0.09037799 |
| GIMAP4     | 472.694256 | 0.95030619 | 0.01461633 | 0.09037799 |
| HBG2       | 4.18430609 | 1.7336502  | 0.01460712 | 0.09037799 |
| KCNMB3     | 168.452276 | -0.8692673 | 0.01456441 | 0.09037799 |
| LTB4R2     | 64.8857768 | -0.9659983 | 0.01461129 | 0.09037799 |
| PRPF3      | 1035.09059 | -0.5660786 | 0.01458392 | 0.09037799 |
| RILPL1     | 374.891029 | -0.5548606 | 0.01460932 | 0.09037799 |
| RNF2       | 452.221528 | -0.4473669 | 0.01454904 | 0.09037799 |
| SNRNP200   | 5761.75576 | -0.5610828 | 0.01453151 | 0.09037799 |
| TMEM150A   | 193.818767 | 0.54758799 | 0.01460689 | 0.09037799 |
| ULK1       | 1038.83325 | -0.7484053 | 0.01461064 | 0.09037799 |
| ZNF451     | 2106.35879 | 0.61426592 | 0.01458925 | 0.09037799 |
| ZRANB1     | 1365.79421 | 0.33926783 | 0.01462383 | 0.09039178 |
| MED21      | 720.408602 | 0.62733549 | 0.01463035 | 0.09039956 |
| BCS1L      | 276.225609 | -0.5050172 | 0.01465264 | 0.09050472 |
| ZNF649     | 299.53749  | 0.39754496 | 0.01466308 | 0.09053659 |
| CAPN12     | 23.2064626 | 1.67001727 | 0.01468102 | 0.09058389 |
| LOC1005063 | 59.2578169 | 1.40634623 | 0.01468129 | 0.09058389 |
| ZNF787     | 267.473499 | -0.5638705 | 0.01468807 | 0.09059316 |
| ZNF438     | 253.589021 | 0.64997351 | 0.01471136 | 0.09070421 |
| DUXA1      | 64.4771733 | 1.80339939 | 0.01476598 | 0.09094294 |
| FAM89B     | 359.022064 | -0.6380621 | 0.01476375 | 0.09094294 |
| TRIM23     | 607.054229 | 0.47225707 | 0.01475985 | 0.09094294 |
| CA12       | 229.427588 | 1.76329063 | 0.01478755 | 0.09104317 |
| IFNLR1     | 114.922804 | 1.21273274 | 0.01482154 | 0.09118845 |
| PARP11     | 231.375661 | 0.60807475 | 0.01482178 | 0.09118845 |
| SMAD9      | 2971.29214 | 1.52589193 | 0.01484925 | 0.09132473 |
| GFM1       | 993.101008 | -0.4260019 | 0.01485488 | 0.09132663 |
| GAPT       | 108.963986 | 1.24483813 | 0.01487929 | 0.09141126 |
| RHCE       | 2.31583359 | 1.74985561 | 0.01487644 | 0.09141126 |
| EMC10      | 1971.62991 | -0.7459591 | 0.01489458 | 0.09146609 |
| SPNS3      | 27.3312957 | 1.72331903 | 0.01489888 | 0.09146609 |
| HHIP       | 241.866653 | -1.8204509 | 0.01495509 | 0.09174468 |

|           |            |            |            |            |
|-----------|------------|------------|------------|------------|
| MAP1S     | 476.590411 | -0.5584416 | 0.01496769 | 0.09174468 |
| RTP4      | 46.842017  | 1.25874066 | 0.01496125 | 0.09174468 |
| TNFSF8    | 158.271972 | 1.18881264 | 0.01495442 | 0.09174468 |
| UCKL1     | 476.149234 | -0.6268887 | 0.01497098 | 0.09174468 |
| FAM172A   | 1072.95612 | 0.65915269 | 0.01501314 | 0.09191614 |
| NLRP12    | 17.4973676 | 1.56017135 | 0.01501502 | 0.09191614 |
| USP21     | 325.020705 | -0.5163378 | 0.01501359 | 0.09191614 |
| TMEM57    | 751.43204  | 0.70443406 | 0.01504059 | 0.09203986 |
| HES6      | 62.0686461 | -0.9975653 | 0.01510288 | 0.09238808 |
| DGKB      | 42.8492869 | 1.44988981 | 0.01511645 | 0.09243815 |
| TBC1D10C  | 27.7028089 | 1.20193184 | 0.01513017 | 0.0924891  |
| FAM86FP   | 12.6986736 | 1.04311634 | 0.01516006 | 0.09260586 |
| RYR1      | 736.440903 | 1.2602584  | 0.01515618 | 0.09260586 |
| CHST11    | 828.94034  | 0.92012013 | 0.01517044 | 0.0926347  |
| LINGO1    | 117.901517 | -1.200868  | 0.01517558 | 0.0926347  |
| LOC150776 | 528.859305 | -0.8909921 | 0.01518497 | 0.09265911 |
| PAX2      | 16.6807826 | 1.83135754 | 0.01520204 | 0.09273026 |
| PRKAR1B   | 310.336625 | 0.88021317 | 0.01525774 | 0.09303698 |
| LOC283194 | 12.4451992 | 1.48485215 | 0.01530121 | 0.09326889 |
| TMEM9B    | 711.513338 | 0.61514537 | 0.0153133  | 0.0933095  |
| GLIPR1L2  | 45.0167404 | 1.36282752 | 0.01536989 | 0.09358785 |
| MTMR11    | 198.360617 | -0.7925133 | 0.01536898 | 0.09358785 |
| CHPT1     | 526.069641 | 0.97196103 | 0.01538277 | 0.09363306 |
| SLC9A3R1  | 1286.44852 | -0.8022339 | 0.01541204 | 0.09377799 |
| AGO2      | 849.251734 | -0.5984071 | 0.01544033 | 0.09391681 |
| ACSL6     | 28.3910778 | 1.48724504 | 0.01545989 | 0.09396919 |
| SH3RF2    | 16.8866182 | -1.3527966 | 0.01545927 | 0.09396919 |
| RPS6KA4   | 561.861331 | -0.6195229 | 0.0154875  | 0.09410371 |
| GTF2F1    | 1160.04298 | 0.43375381 | 0.01550007 | 0.09414676 |
| MRPL35    | 531.168522 | -0.3677419 | 0.01551745 | 0.09421897 |
| RRS1-AS1  | 386.314159 | -1.1502825 | 0.01552797 | 0.09424951 |
| TAF6      | 558.766089 | -0.526487  | 0.01553896 | 0.09428289 |
| ARID3B    | 105.811254 | 0.78497463 | 0.01556451 | 0.0944045  |
| DIRAS1    | 83.9316757 | -1.4002953 | 0.01559159 | 0.09453539 |
| THBS4     | 150.66402  | -1.3891816 | 0.01560196 | 0.09456487 |
| GPC4      | 636.826007 | 1.12040075 | 0.01561108 | 0.09457112 |
| LTBP2     | 17929.4314 | 1.54336758 | 0.01561401 | 0.09457112 |
| DDX41     | 800.502875 | -0.4703319 | 0.0156279  | 0.09462182 |
| TBXAS1    | 447.421025 | 1.05731653 | 0.01564083 | 0.09466673 |
| EFS       | 467.57484  | 1.48985546 | 0.01565082 | 0.09468828 |
| TRPV3     | 96.8397973 | -1.4359948 | 0.01565542 | 0.09468828 |
| CSTB      | 961.470134 | -0.8279481 | 0.01568263 | 0.09481945 |
| LINC01105 | 5.10580199 | -1.7832553 | 0.01569117 | 0.09483764 |
| ATP5J2    | 738.924309 | -0.4764902 | 0.01570668 | 0.09488596 |
| CCDC181   | 53.4214493 | 1.21551282 | 0.01571022 | 0.09488596 |
| METRNL    | 1084.56494 | -0.9794075 | 0.01571603 | 0.09488766 |
| USP24     | 3028.0501  | 0.55550485 | 0.01574298 | 0.09501695 |
| SSRP1     | 1529.44914 | -0.4765459 | 0.01576211 | 0.09509898 |
| NUTF2     | 774.949351 | -0.6075887 | 0.01577144 | 0.09512183 |
| SLC16A4   | 500.419042 | 0.67118063 | 0.01578315 | 0.09512565 |

|            |            |            |            |            |
|------------|------------|------------|------------|------------|
| ZBTB16     | 2292.48418 | 1.02342203 | 0.01577788 | 0.09512565 |
| PEX26      | 701.071792 | -0.7622027 | 0.01579099 | 0.0951395  |
| SLC5A12    | 8.46304761 | 1.64408669 | 0.01582174 | 0.09525785 |
| SSUH2      | 4.23494279 | 1.73015728 | 0.01581825 | 0.09525785 |
| IL6ST      | 14310.509  | 0.58758251 | 0.01584086 | 0.09531924 |
| SIGMAR1    | 656.596095 | -0.5506117 | 0.01584304 | 0.09531924 |
| AP2M1      | 4020.13191 | -0.3293875 | 0.01586768 | 0.09543401 |
| RASD1      | 105.561955 | 1.66450251 | 0.01589086 | 0.09553996 |
| SCO2       | 104.955183 | -0.7494045 | 0.01589808 | 0.09554992 |
| KLHDC8B    | 342.528116 | 0.77825562 | 0.01591739 | 0.09563248 |
| PIF1       | 27.7163585 | -1.3904276 | 0.01592691 | 0.09565622 |
| LINC00176  | 80.2438181 | -1.0753347 | 0.01595373 | 0.09578375 |
| OSBPL8     | 2361.05078 | 0.50127159 | 0.01601853 | 0.09613918 |
| CALU       | 5344.75733 | -0.7606673 | 0.01604882 | 0.0962873  |
| DKK3       | 2451.19709 | 1.20036317 | 0.01607602 | 0.09639437 |
| HTR7P1     | 175.081175 | 0.71054788 | 0.0160779  | 0.09639437 |
| GPR116     | 536.269837 | 1.30957232 | 0.01610401 | 0.09648352 |
| LOC1019271 | 3.37566585 | 1.7290978  | 0.01609898 | 0.09648352 |
| FADD       | 248.135971 | -0.560172  | 0.01616344 | 0.0967046  |
| NCALD      | 793.969901 | 1.6716877  | 0.01615833 | 0.0967046  |
| PRDM2      | 1993.24153 | 0.63533728 | 0.01616168 | 0.0967046  |
| RTP1       | 2.07831859 | 1.78486409 | 0.0161505  | 0.0967046  |
| YY1AP1     | 1096.06738 | -0.4011333 | 0.01618441 | 0.09679631 |
| SLC17A5    | 384.199171 | 0.98345907 | 0.01620653 | 0.09689482 |
| VWDE       | 2.45823095 | -1.8035091 | 0.01621303 | 0.09689997 |
| PEBP4      | 4.41478903 | 1.6692792  | 0.01622571 | 0.09694195 |
| LTK        | 2.84221803 | 1.70015967 | 0.01625667 | 0.09709314 |
| KCNE1      | 30.8538702 | 1.46976835 | 0.01627082 | 0.09714387 |
| MRPL30     | 742.718926 | -0.2778447 | 0.016303   | 0.09730217 |
| ZBTB45     | 151.429211 | -0.6132237 | 0.01631909 | 0.09736433 |
| VWA2       | 36.6086103 | 1.76553274 | 0.0163545  | 0.09754167 |
| ARHGAP15   | 177.03699  | 1.11816606 | 0.01638906 | 0.09764729 |
| LINC01021  | 4.84231688 | -1.8051299 | 0.01638927 | 0.09764729 |
| SMG1P3     | 772.925438 | -0.6187758 | 0.01637984 | 0.09764729 |
| MVD        | 291.31567  | -0.8292518 | 0.01640182 | 0.09768814 |
| DPYD       | 924.230486 | 0.9489106  | 0.01643927 | 0.09785023 |
| POLR3D     | 337.057399 | -0.4975077 | 0.01644043 | 0.09785023 |
| TNIP2      | 278.31101  | -0.545324  | 0.0164618  | 0.09794343 |
| VKORC1L1   | 817.690944 | -0.4551299 | 0.0164735  | 0.09797908 |
| TAF8       | 576.603881 | 0.55586616 | 0.01648486 | 0.09801269 |
| ME1        | 897.406413 | 1.00341062 | 0.0165244  | 0.09821376 |
| ATL1       | 536.005444 | 0.97195638 | 0.01653881 | 0.09826537 |
| LOC1019290 | 9.77399465 | 1.23439614 | 0.01658929 | 0.09853119 |
| ULK2       | 879.864259 | 0.52919443 | 0.01665856 | 0.09890838 |
| FBRSL1     | 612.933889 | -0.7983456 | 0.01667312 | 0.09896063 |
| CKAP4      | 2377.48722 | -0.8470144 | 0.0166978  | 0.09905753 |
| YBX2       | 3.06590676 | -1.5884556 | 0.01670099 | 0.09905753 |
| ARSB       | 975.471404 | -0.6481673 | 0.01672146 | 0.09914471 |
| FUT7       | 5.80296749 | 1.47188903 | 0.01676988 | 0.09939345 |
| TEX21P     | 6.41018392 | 1.54473346 | 0.016775   | 0.09939345 |

|            |            |            |            |            |
|------------|------------|------------|------------|------------|
| FOLR1      | 61.5994305 | 1.69581926 | 0.01679417 | 0.09947271 |
| GPI        | 4754.27336 | -0.771151  | 0.01681548 | 0.09949925 |
| KNSTRN     | 152.38402  | -0.6626434 | 0.01680791 | 0.09949925 |
| KRCC1      | 409.219135 | 0.55216243 | 0.01681992 | 0.09949925 |
| PPP6R2     | 970.002027 | 0.41341564 | 0.01682184 | 0.09949925 |
| EPB41L2    | 5096.80963 | 0.95955621 | 0.01684333 | 0.09952353 |
| LOC1019276 | 9.45018979 | 1.80354677 | 0.01684333 | 0.09952353 |
| MPZL1      | 4650.19166 | -0.6368375 | 0.01683744 | 0.09952353 |
| TMEM156    | 46.0368078 | 1.59715191 | 0.01685124 | 0.09953595 |
| FAM105A    | 1403.87643 | 1.11409068 | 0.01687231 | 0.09962617 |
| OASL       | 60.0060013 | 1.33564667 | 0.01688644 | 0.09967528 |
| SPATA7     | 177.665882 | 0.72362393 | 0.01690223 | 0.09973418 |
| DNAH8      | 4.39895924 | 1.48965523 | 0.01693027 | 0.09974517 |
| HERC2      | 4478.61533 | -0.3394645 | 0.01692003 | 0.09974517 |
| PLD1       | 2134.05242 | 0.94351642 | 0.01693314 | 0.09974517 |
| PWWP2A     | 577.036699 | 0.60188495 | 0.01691522 | 0.09974517 |
| SLA        | 788.702097 | 1.1105791  | 0.01692973 | 0.09974517 |
| C1orf131   | 135.00592  | -0.52108   | 0.01695234 | 0.09982397 |
| GTF2IRD2   | 108.516774 | 0.6827914  | 0.01695849 | 0.09982596 |
| DBP        | 275.761349 | -0.8669699 | 0.0169681  | 0.0998483  |
| C19orf60   | 251.085508 | -0.6104872 | 0.0169984  | 0.09992382 |
| CXCR6      | 21.1482044 | 1.46253933 | 0.01699583 | 0.09992382 |
| LCN10      | 5.35600293 | 1.5977052  | 0.01699677 | 0.09992382 |
| HINT2      | 211.507295 | -0.6508788 | 0.0170086  | 0.09994954 |
| MIR181A1HG | 63.9506814 | -0.9879983 | 0.01702352 | 0.10000297 |
| ADAR       | 6966.18155 | -0.4240248 | 0.01703994 | 0.1000652  |
| FOXO4      | 218.285989 | 0.88301531 | 0.01704615 | 0.10006742 |
| PRKAR2B    | 519.599221 | 1.20661205 | 0.01705748 | 0.10009972 |
| DNAJB1     | 2382.21651 | 0.86216694 | 0.01709266 | 0.1002719  |
| TPMT       | 510.62597  | 1.07757892 | 0.01710127 | 0.10028809 |
| MBD2       | 854.985155 | 0.79989134 | 0.01710922 | 0.10030048 |
| METTL25    | 156.640239 | 0.57245165 | 0.01712408 | 0.10033419 |
| TMEM134    | 158.503434 | -0.6012905 | 0.01712666 | 0.10033419 |
| NPIPA5     | 74.0461572 | -0.8831313 | 0.01713863 | 0.10033946 |
| RASAL3     | 121.74344  | 1.1310848  | 0.01713925 | 0.10033946 |
| SPATA41    | 17.5348674 | -0.9887038 | 0.01716484 | 0.10045499 |
| CHD7       | 995.687042 | -0.7206942 | 0.01722871 | 0.10071013 |
| MROH8      | 80.5365789 | 0.92576878 | 0.01722003 | 0.10071013 |
| TASP1      | 237.027806 | 0.65218352 | 0.01722374 | 0.10071013 |
| UROD       | 683.339778 | 0.54486347 | 0.0172319  | 0.10071013 |
| ALK        | 10.245064  | -1.4220913 | 0.01725459 | 0.10073983 |
| C14orf79   | 82.6879533 | 0.88520893 | 0.01724516 | 0.10073983 |
| PRKG2      | 459.944723 | -1.7902839 | 0.01725211 | 0.10073983 |
| AZI2       | 788.567475 | 0.65507005 | 0.01726318 | 0.10075567 |
| C9orf156   | 201.372596 | 0.45295959 | 0.01728953 | 0.10077952 |
| HIST1H3F   | 139.330821 | -1.3409709 | 0.01728661 | 0.10077952 |
| MAPK6      | 1190.67181 | -0.8506348 | 0.01729075 | 0.10077952 |
| XPR1       | 1086.71249 | -0.3851007 | 0.01729034 | 0.10077952 |
| HIST1H2AE  | 345.924389 | -0.9812011 | 0.01732573 | 0.10092715 |
| LRRCS9     | 1468.09664 | -0.668105  | 0.01733767 | 0.10092715 |

|            |            |            |            |            |
|------------|------------|------------|------------|------------|
| RNU6ATAC   | 16.4678441 | 1.38187965 | 0.0173396  | 0.10092715 |
| USP36      | 1096.01582 | -0.7009168 | 0.0173324  | 0.10092715 |
| LINC00869  | 62.6609195 | 0.82905395 | 0.01737137 | 0.10104356 |
| NCOR2      | 4842.27601 | -0.5562436 | 0.01736661 | 0.10104356 |
| PRIM2      | 230.75792  | 0.48481612 | 0.0173952  | 0.10114793 |
| TRIM9      | 89.9664283 | 1.56554336 | 0.01745346 | 0.10145228 |
| MAP2K3     | 420.681472 | -0.8370345 | 0.01746028 | 0.10145756 |
| ZNF536     | 352.581328 | -1.3211415 | 0.01747395 | 0.10150268 |
| WFDC10B    | 4.00801565 | 1.78649046 | 0.01748338 | 0.1015231  |
| EIF5B      | 1019.3991  | -0.3198341 | 0.01750553 | 0.1016173  |
| HOXA4      | 7.71694105 | -1.7487241 | 0.01751405 | 0.1016324  |
| ADAMTSL4-A | 121.829142 | 1.08654054 | 0.01754    | 0.10174857 |
| RPS14P3    | 31.5273082 | 0.92215318 | 0.01755178 | 0.10178255 |
| CRABP1     | 6264.83547 | -1.5423573 | 0.01756337 | 0.10181537 |
| PHOSPHO2   | 56.9950352 | 0.8043453  | 0.01757016 | 0.10182033 |
| UBE2W      | 771.419387 | 0.4835192  | 0.01760438 | 0.10198422 |
| UBXN4      | 2743.26263 | -0.3110759 | 0.01761156 | 0.10199139 |
| DDX51      | 388.961833 | -0.4578221 | 0.01762973 | 0.10201172 |
| HEATR5A    | 1788.28791 | 0.64962842 | 0.0176329  | 0.10201172 |
| MOK        | 180.683895 | 0.9663067  | 0.01762646 | 0.10201172 |
| MID1IP1    | 669.79548  | -0.9444643 | 0.01764947 | 0.10203878 |
| PPM1N      | 30.0895096 | -1.3142506 | 0.01764466 | 0.10203878 |
| CDC25C     | 13.7858299 | -1.4602168 | 0.01767709 | 0.10211063 |
| ETFA       | 940.163595 | -0.5563869 | 0.01769167 | 0.10211063 |
| FAM216A    | 89.2877286 | -0.6147113 | 0.01766829 | 0.10211063 |
| KIAA1958   | 267.963244 | -0.8479314 | 0.01769759 | 0.10211063 |
| MAPKAP1    | 1298.14841 | -0.2748896 | 0.01768381 | 0.10211063 |
| TIMM17A    | 725.780229 | -0.5926668 | 0.01769013 | 0.10211063 |
| C4orf46    | 129.430198 | -0.7593182 | 0.01770481 | 0.10211794 |
| C14orf1    | 346.338629 | -0.5866746 | 0.01771592 | 0.10214773 |
| CRNDE      | 92.2200669 | 1.15200216 | 0.01772909 | 0.10218933 |
| ACCS       | 279.27533  | 1.01341873 | 0.0177418  | 0.10222824 |
| LOC1019297 | 4.00244019 | 1.48995556 | 0.01775082 | 0.10224496 |
| PRR18      | 2.13280901 | -1.7872123 | 0.01775661 | 0.10224496 |
| CLU        | 67442.9224 | 0.89222021 | 0.01776707 | 0.10227089 |
| DNAJA3     | 710.43536  | -0.4676758 | 0.01779558 | 0.10240063 |
| FBXO4      | 159.92971  | 0.83197122 | 0.01782558 | 0.1025389  |
| PRKAG2-AS1 | 15.9455915 | 1.4692483  | 0.01783193 | 0.10254109 |
| CNN2       | 1188.55978 | 1.02530441 | 0.0178631  | 0.10258283 |
| GRHPR      | 994.676894 | -0.4792573 | 0.01786298 | 0.10258283 |
| PPAT       | 222.565394 | -0.6767171 | 0.01786159 | 0.10258283 |
| SOX7       | 21.9790243 | 1.41672662 | 0.01785756 | 0.10258283 |
| SPTA1      | 5.15820969 | 1.520888   | 0.01787789 | 0.10263342 |
| LINC00276  | 5.91128777 | 1.51783812 | 0.01788965 | 0.1026666  |
| KCNJ8      | 398.520384 | 1.68475297 | 0.01790235 | 0.10270515 |
| NME2       | 298.018347 | -0.8505252 | 0.01791303 | 0.10273208 |
| ZNF695     | 10.2762556 | -1.4203042 | 0.01794387 | 0.10287459 |
| CD93       | 2297.11598 | 0.86842946 | 0.01795717 | 0.10291645 |
| HMGN3-AS1  | 59.9048056 | 1.10156725 | 0.01797036 | 0.1029362  |
| HYMAI      | 152.356897 | 1.32073592 | 0.01797261 | 0.1029362  |

|           |            |            |            |            |
|-----------|------------|------------|------------|------------|
| C19orf25  | 285.978897 | 0.58601377 | 0.01797944 | 0.10294097 |
| ANP32E    | 943.616824 | -0.5998683 | 0.01803078 | 0.10320053 |
| SHC2      | 673.508095 | 0.98022763 | 0.01810579 | 0.10359532 |
| CHRNA6    | 14.0883672 | 1.4174843  | 0.01812328 | 0.10366079 |
| C11orf70  | 64.7913217 | 1.32880831 | 0.01820515 | 0.10402624 |
| LINC01119 | 5.71495144 | 1.40078617 | 0.01820316 | 0.10402624 |
| SOGA3     | 23.1598953 | 1.42361964 | 0.01820535 | 0.10402624 |
| CDH8      | 58.8669958 | -1.5888913 | 0.01821915 | 0.10406572 |
| LOC643733 | 37.7282601 | 1.33379152 | 0.01822438 | 0.10406572 |
| SRD5A1    | 123.987278 | -0.8794075 | 0.0182409  | 0.10412538 |
| ATF3      | 284.007951 | 1.57536806 | 0.01825434 | 0.1041675  |
| RPS29     | 1556.60887 | 0.69797653 | 0.01826235 | 0.10417852 |
| LOC653712 | 9.54158566 | -1.5288839 | 0.01827    | 0.10418754 |
| NUTM2D    | 32.5486423 | 1.08265515 | 0.01828031 | 0.10421176 |
| CDCA2     | 75.8952973 | -1.3880591 | 0.01828854 | 0.10422403 |
| CASP7     | 247.975456 | 0.71227609 | 0.01831541 | 0.10434255 |
| SEC16A    | 3600.1054  | -0.5525003 | 0.01832349 | 0.1043539  |
| S1PR1     | 219.317483 | 1.26700182 | 0.01833048 | 0.10435909 |
| CLEC14A   | 156.9852   | 1.23301483 | 0.01835414 | 0.10439035 |
| CXorf36   | 137.803221 | 1.27270704 | 0.01835229 | 0.10439035 |
| HERC6     | 240.451455 | 0.7921372  | 0.0183603  | 0.10439035 |
| MGAT3     | 2398.74645 | -1.2265903 | 0.01835881 | 0.10439035 |
| TRAK2     | 1281.80865 | -0.3757653 | 0.01839977 | 0.10458016 |
| CNIH2     | 6.56985539 | -1.1894254 | 0.01840879 | 0.10459679 |
| SLC35G1   | 419.859939 | 1.16069414 | 0.01841672 | 0.10460723 |
| VENTX     | 187.974408 | 1.36756407 | 0.0184241  | 0.10461454 |
| RAB40C    | 317.959242 | -0.5035523 | 0.01850983 | 0.10506653 |
| ASIC3     | 43.5797018 | -1.0341777 | 0.01852115 | 0.10508689 |
| ITIH3     | 21.0675805 | 1.65245044 | 0.01852566 | 0.10508689 |
| RASEF     | 90.2514861 | 1.72076958 | 0.0185806  | 0.10536373 |
| ZNF107    | 398.261054 | -0.3937657 | 0.01859711 | 0.10542252 |
| IL6R      | 507.998775 | 0.99632209 | 0.0186392  | 0.10562623 |
| LINC00460 | 10.7580327 | -1.7734447 | 0.01865314 | 0.10563551 |
| TTL       | 1033.11273 | -0.4840586 | 0.01865006 | 0.10563551 |
| IKBIP     | 408.039834 | -0.8021457 | 0.01866273 | 0.10565493 |
| FBN2      | 3602.31898 | -1.2450474 | 0.01872659 | 0.10592388 |
| RABL2B    | 153.494792 | 1.00615968 | 0.01872875 | 0.10592388 |
| SMUG1     | 361.815648 | -0.5084065 | 0.01872701 | 0.10592388 |
| CD28      | 100.340207 | -1.3518192 | 0.01875269 | 0.10602433 |
| WDR66     | 43.9050092 | 1.17927852 | 0.01879864 | 0.10624916 |
| LOC286437 | 206.427126 | 0.60674979 | 0.01880822 | 0.10626827 |
| PHLPP2    | 1392.29705 | -0.8160303 | 0.01881623 | 0.10627858 |
| GCSHP3    | 162.282557 | -0.5319524 | 0.01883905 | 0.10633749 |
| PRKRIR    | 859.399332 | -0.408863  | 0.01883567 | 0.10633749 |
| TPBGL     | 3.80726737 | -1.5227741 | 0.01885041 | 0.10636661 |
| GADD45B   | 1851.75385 | 1.22091043 | 0.01887401 | 0.10639487 |
| ITGA8     | 439.048041 | 1.65981642 | 0.01887363 | 0.10639487 |
| UBAC2-AS1 | 15.7325874 | 1.01702639 | 0.01886513 | 0.10639487 |
| ZNF512    | 1265.13988 | -0.3963204 | 0.01888461 | 0.1064197  |
| LAPTM4B   | 1614.85534 | -0.8098255 | 0.01892707 | 0.10662395 |

|            |            |            |            |            |
|------------|------------|------------|------------|------------|
| ITIH4      | 517.329704 | 1.32710166 | 0.01895756 | 0.10676067 |
| CISD1      | 316.282478 | -0.5758579 | 0.0189782  | 0.10677184 |
| FBXO38     | 954.940999 | 0.47967513 | 0.01897327 | 0.10677184 |
| LOC1002892 | 154.447735 | 0.71255847 | 0.01896956 | 0.10677184 |
| LOC283788  | 684.527991 | 1.20996975 | 0.01900496 | 0.10685896 |
| RERGL      | 13.2011755 | 1.45525522 | 0.01900614 | 0.10685896 |
| GNE        | 824.05466  | -0.5890328 | 0.01902308 | 0.10688419 |
| GRIK2      | 27.0409332 | 1.53461786 | 0.01902033 | 0.10688419 |
| WDR81      | 1162.14716 | 0.66989301 | 0.01902996 | 0.10688784 |
| BMX        | 12.4159133 | 1.53513351 | 0.01904354 | 0.10692912 |
| SLC27A2    | 12.950246  | 1.43210499 | 0.01905883 | 0.10694503 |
| UTP20      | 1144.27985 | -0.3842276 | 0.01905705 | 0.10694503 |
| IQCC       | 35.7448966 | 0.96209588 | 0.0190952  | 0.10707908 |
| STAM2      | 1225.16519 | 0.3720252  | 0.01909234 | 0.10707908 |
| FAM114A2   | 481.09737  | 0.43944139 | 0.01911768 | 0.10717013 |
| RRN3P2     | 101.510297 | 1.27789711 | 0.01915954 | 0.10736221 |
| TMEM91     | 84.259149  | 0.69924591 | 0.01916445 | 0.10736221 |
| GNG12      | 1458.44564 | 0.87004955 | 0.01918542 | 0.10740959 |
| SEC22C     | 962.68368  | 0.59103468 | 0.01918404 | 0.10740959 |
| NSUN5P2    | 208.334343 | 0.82254159 | 0.01923807 | 0.10766919 |
| SNX22      | 33.4198641 | 1.41013858 | 0.01926529 | 0.1077513  |
| SPNS1      | 454.028095 | -0.5514697 | 0.01926273 | 0.1077513  |
| SRPRB      | 947.379963 | -0.4467302 | 0.01927853 | 0.10779022 |
| PLSCR4     | 1083.88082 | 1.00914738 | 0.01928872 | 0.10781207 |
| KBTBD12    | 18.6695835 | 1.62972336 | 0.01930677 | 0.10787784 |
| MTHFD1     | 832.662548 | -0.5599714 | 0.01931718 | 0.10790087 |
| ANP32B     | 1247.62665 | -1.0577193 | 0.01936116 | 0.10804063 |
| C17orf70   | 640.460367 | -0.4775011 | 0.01938491 | 0.10804063 |
| C3orf62    | 124.759786 | 0.80871652 | 0.01936173 | 0.10804063 |
| DAK        | 389.470046 | -0.6289456 | 0.01937962 | 0.10804063 |
| OR2A7      | 8.34378238 | 1.40316723 | 0.01937281 | 0.10804063 |
| PTPRS      | 2326.9269  | 0.59757968 | 0.01937509 | 0.10804063 |
| VILL       | 222.081085 | 0.68070367 | 0.01938626 | 0.10804063 |
| PGPEP1     | 1135.94535 | 0.35485628 | 0.01939482 | 0.10805328 |
| SLC52A2    | 283.095502 | -0.5695698 | 0.01944896 | 0.10831973 |
| ZNF502     | 242.030996 | 0.59691569 | 0.01949842 | 0.10855996 |
| WDR3       | 623.125899 | -0.5502156 | 0.01951202 | 0.10860048 |
| NAA25      | 912.785326 | -0.4332788 | 0.01952519 | 0.10863852 |
| AQP6       | 2.86727586 | -1.7348396 | 0.01953323 | 0.10864804 |
| AKIP1      | 223.183921 | 0.66183044 | 0.01955207 | 0.10871761 |
| PIK3C3     | 958.765643 | 0.6588203  | 0.01957079 | 0.10878645 |
| ESCO1      | 626.336207 | 0.56798292 | 0.01958703 | 0.10884149 |
| EIF4E3     | 553.58955  | 0.83042672 | 0.01961778 | 0.10897709 |
| ADCY4      | 81.1936314 | 1.25483788 | 0.01963838 | 0.10902095 |
| ZNF271     | 714.947805 | 0.55260583 | 0.01963363 | 0.10902095 |
| XRCC6      | 2220.29944 | 0.5835786  | 0.01965324 | 0.10906818 |
| SCIN       | 202.229855 | 1.29474663 | 0.0196774  | 0.10916694 |
| SURF1      | 356.437675 | -0.3876341 | 0.0196863  | 0.10918107 |
| ASPHD1     | 2.84059966 | -1.7269924 | 0.01970263 | 0.10920107 |
| NPPA-AS1   | 8.06957441 | 1.34314394 | 0.01969966 | 0.10920107 |

|           |            |            |            |            |
|-----------|------------|------------|------------|------------|
| PRKRA     | 444.868932 | -0.2828259 | 0.01971556 | 0.10923744 |
| APOBEC3B  | 11.7956594 | -1.2859418 | 0.01973722 | 0.10932215 |
| C17orf107 | 58.5117103 | 1.05035288 | 0.0197524  | 0.10933647 |
| ZZZ3      | 890.405336 | 0.54739459 | 0.01975254 | 0.10933647 |
| DMGDH     | 242.768888 | 1.2775386  | 0.01979344 | 0.10952755 |
| GSTM2     | 307.228774 | 1.05720671 | 0.01982608 | 0.10967276 |
| DLG2      | 226.674019 | 1.36955937 | 0.01987245 | 0.109887   |
| RPL39L    | 72.6218578 | -0.9985328 | 0.01987761 | 0.109887   |
| C12orf4   | 489.975137 | 0.48142085 | 0.01989834 | 0.10993082 |
| NETO1     | 38.8873156 | -1.7262867 | 0.0198952  | 0.10993082 |
| POLG      | 1027.70939 | -0.5507344 | 0.01991542 | 0.10995436 |
| ZNF512B   | 1504.70915 | -0.6883647 | 0.01991183 | 0.10995436 |
| C1orf198  | 1358.36919 | 0.97456837 | 0.01995066 | 0.11009442 |
| GOLM1     | 2028.5157  | -0.7773127 | 0.01995361 | 0.11009442 |
| ISM1-AS1  | 3.70243711 | 1.65051083 | 0.01996265 | 0.1101089  |
| LOC283038 | 4.44830574 | -1.5391476 | 0.01997297 | 0.11013042 |
| HSPA1A    | 14.9504345 | -1.7189129 | 0.01998227 | 0.11014634 |
| PAM       | 5680.66381 | 1.08353983 | 0.01999975 | 0.11018589 |
| SNX2      | 2116.04213 | 0.77342364 | 0.02000229 | 0.11018589 |
| TELO2     | 446.365992 | -0.5984625 | 0.02002548 | 0.11027825 |
| BBS2      | 1032.70092 | 0.65995635 | 0.02004243 | 0.11031953 |
| RPL26L1   | 182.673323 | -0.5101035 | 0.02004583 | 0.11031953 |
| C9orf170  | 15.4189691 | 1.17238433 | 0.02008113 | 0.1104594  |
| PKN2      | 1586.39645 | 0.49633655 | 0.02008411 | 0.1104594  |
| HPN       | 20.4907578 | 1.26237248 | 0.02009759 | 0.11049814 |
| COL2A1    | 2511.06533 | -1.6068087 | 0.02013644 | 0.11057003 |
| GEMIN8    | 290.257195 | 0.56165361 | 0.02012337 | 0.11057003 |
| SNF8      | 464.925242 | -0.4169734 | 0.02013138 | 0.11057003 |
| TRIB3     | 123.407595 | -1.3009365 | 0.02012568 | 0.11057003 |
| DHRS1     | 195.686427 | 0.76872757 | 0.02017507 | 0.11074674 |
| PDZRN3    | 1825.27759 | 1.15160905 | 0.02019919 | 0.11084369 |
| MRPL21    | 247.396782 | -0.454697  | 0.02022385 | 0.11090811 |
| THRB      | 67.0258217 | 1.53066903 | 0.02022016 | 0.11090811 |
| GTPBP3    | 142.309699 | -0.548129  | 0.02023153 | 0.11091477 |
| COMMD8    | 141.326622 | 0.59995986 | 0.02026303 | 0.11105149 |
| DHTKD1    | 1183.82895 | -0.6820005 | 0.02027866 | 0.11105149 |
| PTPLB     | 307.820395 | 0.84626153 | 0.02028234 | 0.11105149 |
| RTCB      | 727.011549 | 0.56486784 | 0.02027204 | 0.11105149 |
| TMEM189   | 515.110623 | -0.8761575 | 0.02029139 | 0.11106559 |
| LRRC27    | 167.50679  | 0.70310572 | 0.0203016  | 0.11108607 |
| TOE1      | 129.891419 | 0.81855045 | 0.02031348 | 0.11111563 |
| CHRNA4    | 417.093931 | -1.7450167 | 0.02032307 | 0.11113268 |
| C10orf11  | 79.7484539 | 0.78227464 | 0.02041768 | 0.11129772 |
| CD86      | 318.373859 | 0.96628204 | 0.02041598 | 0.11129772 |
| CPOX      | 220.793169 | -0.5516575 | 0.02042099 | 0.11129772 |
| LINC00839 | 10.8564168 | -1.7416852 | 0.02041513 | 0.11129772 |
| MCM7      | 862.656905 | -0.6620375 | 0.0203784  | 0.11129772 |
| NINL      | 1274.41555 | -0.9798697 | 0.02037037 | 0.11129772 |
| NME5      | 75.4577754 | 1.37831307 | 0.02041721 | 0.11129772 |
| PANK1     | 416.339057 | -1.1097651 | 0.02039716 | 0.11129772 |

|           |            |            |            |            |
|-----------|------------|------------|------------|------------|
| PCGF5     | 2705.88435 | 0.844488   | 0.02042614 | 0.11129772 |
| PINLYP    | 92.0573632 | -0.6291399 | 0.02038489 | 0.11129772 |
| RRP8      | 223.258719 | 0.53114248 | 0.02043106 | 0.11129772 |
| TLE1      | 261.321828 | 0.96576038 | 0.02042892 | 0.11129772 |
| MTX2      | 266.75279  | -0.3763987 | 0.02050196 | 0.11164852 |
| DOCK9-AS2 | 19.4667428 | 1.29125623 | 0.02051991 | 0.11171084 |
| DLL4      | 123.080349 | 1.366389   | 0.02052817 | 0.11172037 |
| RFPL1S    | 30.6003401 | 1.46295911 | 0.02055471 | 0.11182935 |
| ZBTB46    | 572.550252 | -0.843011  | 0.02058269 | 0.11194607 |
| EMC9      | 70.1757727 | -0.7760699 | 0.02062749 | 0.11215419 |
| ESYT1     | 2464.20758 | 0.48631722 | 0.02065603 | 0.11227385 |
| VAT1      | 2280.95861 | 0.79602782 | 0.02069745 | 0.11246336 |
| LRRC38    | 90.4002961 | -1.5316222 | 0.02071033 | 0.11249773 |
| LOC727896 | 58.6877227 | 1.02448607 | 0.02074092 | 0.11262824 |
| CAT       | 1773.41932 | -0.720784  | 0.02075525 | 0.11263481 |
| FARS2     | 224.858314 | 0.6555715  | 0.02075151 | 0.11263481 |
| SH2D4B    | 11.5757425 | -1.6089969 | 0.02076531 | 0.11265377 |
| ABCF3     | 723.35902  | -0.259881  | 0.02081579 | 0.11269294 |
| EGFL6     | 3351.67877 | 1.7440432  | 0.02081849 | 0.11269294 |
| GTF2B     | 240.811257 | 0.60472    | 0.02080601 | 0.11269294 |
| HN1       | 406.539619 | -0.6623968 | 0.02079163 | 0.11269294 |
| LINC00467 | 57.5224084 | -0.8129509 | 0.0208048  | 0.11269294 |
| PAQR5     | 3776.11758 | -1.4469024 | 0.02078033 | 0.11269294 |
| POLK      | 1155.7845  | 0.35447787 | 0.02081706 | 0.11269294 |
| DPY19L4   | 1032.89447 | 0.61946431 | 0.02085671 | 0.11275763 |
| MPG       | 494.336217 | -0.5131134 | 0.02085309 | 0.11275763 |
| SDK1      | 86.9905638 | -0.822688  | 0.02084164 | 0.11275763 |
| SEC61G    | 262.831707 | 0.81948741 | 0.02085233 | 0.11275763 |
| ITPKC     | 599.213534 | 0.49159614 | 0.02089534 | 0.11293087 |
| TMEM104   | 538.411892 | -0.5590652 | 0.02095898 | 0.11322453 |
| TMEM201   | 270.750953 | -0.7847897 | 0.02096684 | 0.11322453 |
| TXNRD2    | 172.762009 | -0.5597603 | 0.02096946 | 0.11322453 |
| TNFSF13B  | 111.850048 | 0.94590833 | 0.02098512 | 0.11327348 |
| PIEZO2    | 3612.49629 | -1.3938375 | 0.02099399 | 0.11328571 |
| TRAPPC8   | 1422.68175 | 0.44526634 | 0.02101812 | 0.11338026 |
| ATE1-AS1  | 20.3149198 | 1.36284628 | 0.02104504 | 0.11338901 |
| CSRNP1    | 596.340544 | 1.21938614 | 0.02103977 | 0.11338901 |
| PTTG2     | 6.1697044  | 1.50112658 | 0.02104616 | 0.11338901 |
| TRABD2A   | 14.8753174 | -1.1728748 | 0.02102636 | 0.11338901 |
| CD300LB   | 11.2344462 | 1.27975301 | 0.02107729 | 0.11352107 |
| DLEU2L    | 36.3651922 | 1.03248648 | 0.0211129  | 0.11360593 |
| FFAR2     | 4.71347766 | 1.65541603 | 0.02110953 | 0.11360593 |
| WNT10A    | 9.29393723 | -1.5870373 | 0.02110451 | 0.11360593 |
| GFAP      | 537.481296 | -1.6499769 | 0.02112052 | 0.11361131 |
| BTG2      | 6984.34617 | 1.0033847  | 0.02114374 | 0.11366618 |
| SLC35E3   | 281.935814 | -0.5258201 | 0.02114396 | 0.11366618 |
| PTCHD4    | 170.980958 | 1.2015769  | 0.02115893 | 0.11371102 |
| SRSF2     | 2589.75345 | -0.3690251 | 0.02119284 | 0.11385763 |
| RGN       | 17.9322119 | 1.71139563 | 0.02120954 | 0.11390255 |
| TSPO      | 255.460096 | 0.91893984 | 0.02121447 | 0.11390255 |

|            |            |            |            |            |
|------------|------------|------------|------------|------------|
| PHF13      | 202.885754 | 0.57612974 | 0.02123694 | 0.11398753 |
| PAXBP1     | 1246.85915 | -0.8170796 | 0.02124572 | 0.11399897 |
| GMPPA      | 325.181104 | -0.5764772 | 0.02126155 | 0.11404829 |
| C19orf68   | 54.0471283 | -0.6553951 | 0.0212792  | 0.11407165 |
| RBM4       | 804.055284 | -0.3338691 | 0.02127778 | 0.11407165 |
| WDR34      | 432.928856 | -0.4903039 | 0.02130018 | 0.11414848 |
| GFRA1      | 2186.48388 | 1.73734541 | 0.02131812 | 0.11420895 |
| BMP7       | 419.901145 | -1.5098441 | 0.02133556 | 0.11426671 |
| C5orf49    | 5.17829301 | 1.620571   | 0.02137659 | 0.11435894 |
| GALNT8     | 3.43699559 | 1.61272478 | 0.02137258 | 0.11435894 |
| LINC00673  | 3.5807248  | -1.4796914 | 0.02137942 | 0.11435894 |
| ZNF674-AS1 | 92.0867957 | 0.63893405 | 0.02136388 | 0.11435894 |
| COPS6      | 836.921838 | -0.5642288 | 0.02139039 | 0.11436479 |
| FGF13      | 8.90206187 | -1.3155369 | 0.02139729 | 0.11436479 |
| TEKT2      | 2.43109057 | 1.67031668 | 0.02140051 | 0.11436479 |
| PHF1       | 54.998836  | 0.72110356 | 0.02140743 | 0.11436619 |
| AOAH       | 338.834967 | 1.125257   | 0.0214148  | 0.11436994 |
| FAM161A    | 98.3010741 | -0.6768981 | 0.02142941 | 0.11441241 |
| LOC1001304 | 11.0348227 | 1.63564974 | 0.02146863 | 0.11458613 |
| RNF216     | 1586.51278 | 0.35832809 | 0.02149035 | 0.1146664  |
| MICAL2     | 1504.49289 | -0.7902231 | 0.0215173  | 0.11477452 |
| FBXO10     | 312.623268 | -0.7734786 | 0.02156692 | 0.11500347 |
| C6orf211   | 338.554542 | 0.5254302  | 0.02160185 | 0.11504678 |
| LINC00174  | 243.767055 | -0.8644777 | 0.02160086 | 0.11504678 |
| LMAN2L     | 359.692531 | 0.65494138 | 0.02159452 | 0.11504678 |
| TMEM170B   | 491.422144 | 0.69869127 | 0.02159819 | 0.11504678 |
| SLC37A3    | 801.079978 | -0.514099  | 0.02161119 | 0.11506081 |
| MRPL46     | 231.011845 | -0.7152375 | 0.02167662 | 0.11537341 |
| AARS2      | 606.625563 | 0.53281866 | 0.02168866 | 0.11537653 |
| SCRIB      | 1058.17123 | -0.6169613 | 0.02169065 | 0.11537653 |
| DISP2      | 496.785995 | 1.27617558 | 0.0217086  | 0.11543622 |
| MYBPC2     | 16.9520664 | -1.6406782 | 0.02173651 | 0.11544676 |
| NLRC3      | 39.5340022 | 0.97658421 | 0.02173748 | 0.11544676 |
| PARM1      | 81.3725911 | 1.27370496 | 0.02173666 | 0.11544676 |
| ZNF671     | 295.425037 | 0.93334031 | 0.02171911 | 0.11544676 |
| CMIP       | 576.545958 | -0.8618803 | 0.02175921 | 0.11552639 |
| NFYC       | 472.828088 | -0.493231  | 0.02179138 | 0.11565834 |
| TSPAN12    | 154.022834 | 1.22205175 | 0.02179754 | 0.11565834 |
| ARAP3      | 231.297077 | 1.14582322 | 0.02181001 | 0.11568875 |
| S1PR5      | 4.27670052 | -1.3665024 | 0.02182606 | 0.11573811 |
| FLJ16779   | 96.7014024 | -1.5953991 | 0.02184355 | 0.11579511 |
| C4orf3     | 1973.31924 | 0.62723271 | 0.02187466 | 0.11583565 |
| CLASP1     | 2277.71977 | -0.2436208 | 0.02186076 | 0.11583565 |
| EXT2       | 1849.88958 | 0.65884076 | 0.02188248 | 0.11583565 |
| RAB36      | 148.985626 | 1.083651   | 0.02187045 | 0.11583565 |
| ZNF791     | 600.316909 | 0.57453332 | 0.02188494 | 0.11583565 |
| TMEM119    | 364.811736 | 1.47671038 | 0.02189271 | 0.11584103 |
| NPEPPS     | 2015.77707 | -0.49753   | 0.02193003 | 0.1159902  |
| SCAF1      | 1036.56141 | -0.4655122 | 0.02193441 | 0.1159902  |
| C11orf24   | 442.820261 | -0.5676807 | 0.02197437 | 0.11616569 |

|           |            |            |            |            |
|-----------|------------|------------|------------|------------|
| ZNF286A   | 341.115594 | 0.59206854 | 0.02198322 | 0.11617673 |
| EML5      | 168.916919 | 1.22404137 | 0.02203237 | 0.11640063 |
| ASB6      | 439.717181 | -0.4249328 | 0.02207089 | 0.11653241 |
| PRICKLE2  | 588.390033 | 1.08131489 | 0.02206753 | 0.11653241 |
| TCERG1L   | 13.6385159 | -1.7191858 | 0.02210258 | 0.11666384 |
| KIF26A    | 95.972735  | -1.3787468 | 0.02215004 | 0.11685046 |
| NARF      | 366.387205 | -0.5455336 | 0.02215836 | 0.11685046 |
| VAPA      | 2247.48085 | 0.59375646 | 0.02215183 | 0.11685046 |
| TEAD4     | 156.466631 | -0.9137532 | 0.02217681 | 0.11691185 |
| EFCAB14   | 3555.60162 | 0.49818094 | 0.02218773 | 0.11693351 |
| IFIT1     | 718.545608 | 0.50925159 | 0.02219612 | 0.11694179 |
| CRYGS     | 17.3284475 | 1.13726434 | 0.02221437 | 0.11700202 |
| RAD21-AS1 | 3.08948919 | 1.58823625 | 0.02224297 | 0.11711675 |
| C20orf196 | 27.4447588 | 0.98849024 | 0.02228696 | 0.11713277 |
| GSE1      | 1158.55812 | -0.7907294 | 0.02228537 | 0.11713277 |
| HBD       | 6.68293534 | 1.44825878 | 0.02225511 | 0.11713277 |
| PCAT1     | 9.61682346 | -1.3149296 | 0.02227408 | 0.11713277 |
| RAB3IL1   | 2074.56965 | -0.6018492 | 0.02228355 | 0.11713277 |
| SMG7      | 1873.68615 | -0.6936084 | 0.02227158 | 0.11713277 |
| HCG4B     | 10.2270767 | 1.67792257 | 0.02232127 | 0.11727718 |
| DENND4C   | 2357.9721  | 0.43811369 | 0.02233537 | 0.11731536 |
| SLC7A8    | 566.379547 | 1.0729248  | 0.02236106 | 0.11741437 |
| ZNF562    | 1238.3956  | 0.48167975 | 0.02237387 | 0.11744571 |
| BIRC2     | 1419.71455 | 0.33447856 | 0.02239636 | 0.11749189 |
| MKX       | 26.3316314 | -1.4881019 | 0.02239194 | 0.11749189 |
| MSI1      | 54.4423414 | 0.84690287 | 0.02242692 | 0.11757433 |
| NOMO1     | 882.716877 | -0.559645  | 0.02243262 | 0.11757433 |
| UBQLN1    | 2357.85255 | -0.5497912 | 0.02241954 | 0.11757433 |
| CHMP1B    | 2670.73151 | 1.15771545 | 0.02246008 | 0.11768234 |
| CIDEB     | 104.643706 | 0.81705087 | 0.02248877 | 0.11775513 |
| RPL27A    | 5356.81169 | 0.4001114  | 0.02249456 | 0.11775513 |
| TRIM26    | 38.2113068 | -1.6804735 | 0.02249081 | 0.11775513 |
| UBE2I     | 1049.62405 | -0.4881219 | 0.02251158 | 0.11780834 |
| RARA      | 722.729577 | -0.5206474 | 0.02252938 | 0.11786552 |
| LEFTY2    | 3.27560521 | 1.59456812 | 0.022544   | 0.11790611 |
| DAGLB     | 370.712165 | 0.59421618 | 0.02256803 | 0.11799583 |
| CYBA      | 713.383201 | 0.72962552 | 0.02257727 | 0.11800816 |
| GABARAP   | 2163.76226 | 0.56229326 | 0.02258716 | 0.11801886 |
| RRAS2     | 565.465325 | 0.74801687 | 0.02259994 | 0.11801886 |
| SNCB      | 3.75753458 | -1.7088047 | 0.02259772 | 0.11801886 |
| HEATR2    | 335.561361 | -0.5050866 | 0.02260817 | 0.11802594 |
| CCR2      | 35.5987882 | 1.34491737 | 0.0226438  | 0.11810418 |
| NDUFB10   | 660.972147 | -0.453013  | 0.02264013 | 0.11810418 |
| SOX12     | 251.452184 | -0.9954528 | 0.02264058 | 0.11810418 |
| KIAA1524  | 215.430916 | -0.6729588 | 0.02265398 | 0.11812138 |
| RBM5      | 2264.19146 | 0.48987746 | 0.02266382 | 0.11813679 |
| NDUFB6    | 299.123359 | 0.44548073 | 0.02267172 | 0.1181421  |
| BOC       | 7068.19074 | 1.34917109 | 0.02270241 | 0.11826611 |
| DRD4      | 11.8043634 | -1.0667985 | 0.02272664 | 0.11835644 |
| CXorf56   | 339.831118 | 0.47251769 | 0.02276004 | 0.11849442 |

|           |            |            |            |            |
|-----------|------------|------------|------------|------------|
| ERBB3     | 60.0510822 | -1.1955688 | 0.02277952 | 0.11855989 |
| IGBP1     | 731.444842 | 0.49165558 | 0.02280338 | 0.11861211 |
| MARCH9    | 173.967908 | -0.5343338 | 0.02280327 | 0.11861211 |
| C19orf38  | 24.9141443 | 1.15627083 | 0.0228158  | 0.11864079 |
| PLXNA2    | 3080.63321 | 1.16983936 | 0.0228715  | 0.11889066 |
| SRCAP     | 3189.55851 | -0.5292993 | 0.02287771 | 0.11889066 |
| CPVL      | 453.196492 | 0.81359351 | 0.02289426 | 0.11894068 |
| GALC      | 597.221497 | 0.52646822 | 0.02291538 | 0.11901436 |
| LTC4S     | 53.0292913 | 1.15062044 | 0.02294409 | 0.11912742 |
| GDF7      | 20.5420762 | -1.3545808 | 0.02295634 | 0.119155   |
| NHSL1     | 492.866799 | 0.92180786 | 0.02297115 | 0.11919582 |
| ZNF827    | 462.0327   | -0.9358806 | 0.02304123 | 0.11952333 |
| KRTCAP3   | 9.09576851 | -0.9938747 | 0.02305128 | 0.1195299  |
| PKN3      | 162.094701 | -1.0926161 | 0.02307035 | 0.1195299  |
| SELL      | 90.9446262 | 0.95212798 | 0.02306509 | 0.1195299  |
| TNFRSF1B  | 974.791404 | 0.81023393 | 0.0230668  | 0.1195299  |
| SETD4     | 318.994173 | 0.42281737 | 0.02310077 | 0.1196514  |
| C15orf39  | 533.409495 | -1.1055413 | 0.02315585 | 0.11981467 |
| CTNNBIP1  | 380.015739 | 0.76758513 | 0.0231542  | 0.11981467 |
| PDIA4     | 2921.44059 | -0.7874469 | 0.02316021 | 0.11981467 |
| WASH1     | 194.183184 | 0.66344484 | 0.02314703 | 0.11981467 |
| AKAP8     | 754.992043 | 0.44040734 | 0.02317369 | 0.11983321 |
| SEC31B    | 531.068873 | 0.74286598 | 0.02317776 | 0.11983321 |
| AIM1      | 205.408669 | 0.94879816 | 0.02322704 | 0.1199074  |
| ASIC2     | 2.25979159 | -1.649114  | 0.02322494 | 0.1199074  |
| G RTP1    | 89.5097649 | -0.4761225 | 0.02320738 | 0.1199074  |
| HTR3A     | 3.0351101  | -1.7034964 | 0.02320852 | 0.1199074  |
| TRPC3     | 565.022136 | 1.43286358 | 0.0232174  | 0.1199074  |
| SF3B4     | 549.544051 | -0.6528081 | 0.02323903 | 0.11993323 |
| CHAF1A    | 188.598216 | -0.8101147 | 0.02326222 | 0.12001686 |
| AK9       | 142.425831 | 0.87223058 | 0.02330763 | 0.12009346 |
| GPIHBP1   | 39.4294886 | 1.3286232  | 0.02332243 | 0.12009346 |
| IP6K1     | 951.520278 | 0.48895713 | 0.0233258  | 0.12009346 |
| ISCU      | 1110.07282 | 0.43489669 | 0.02332605 | 0.12009346 |
| MAPK14    | 1048.11394 | 0.5203739  | 0.02330027 | 0.12009346 |
| TP53INP2  | 1059.98649 | -0.8051366 | 0.02329017 | 0.12009346 |
| UBAC1     | 574.692795 | -0.5560231 | 0.02329442 | 0.12009346 |
| DNAH6     | 83.3163078 | 1.21119271 | 0.02333929 | 0.12012559 |
| LOC339803 | 178.535549 | -0.5262572 | 0.02336017 | 0.12016101 |
| RCAN1     | 644.897121 | 0.63356566 | 0.0233584  | 0.12016101 |
| PCDHB5    | 544.862374 | -1.1643041 | 0.02338383 | 0.12022706 |
| PDK4      | 1903.97842 | 1.38384145 | 0.02338702 | 0.12022706 |
| IL23R     | 3.93080257 | -1.5216647 | 0.02341486 | 0.12033415 |
| GRIK3     | 5.73216054 | -1.6178889 | 0.02342927 | 0.12037216 |
| PRR29     | 21.0895705 | 1.44210318 | 0.02346067 | 0.12049743 |
| AIM1L     | 2.33786897 | -1.6399346 | 0.02350622 | 0.12067343 |
| THOC7     | 258.089601 | 0.49298154 | 0.023509   | 0.12067343 |
| GALNT9    | 39.5830833 | -1.6752944 | 0.02355407 | 0.12071447 |
| NRIP3     | 31.5442833 | 1.5387342  | 0.02352454 | 0.12071447 |
| PAN3-AS1  | 44.0575589 | 0.66715652 | 0.02354013 | 0.12071447 |

|            |            |            |            |            |
|------------|------------|------------|------------|------------|
| RBMX2      | 228.686603 | 0.46574713 | 0.02355166 | 0.12071447 |
| SAP25      | 102.059782 | -0.7827351 | 0.0235567  | 0.12071447 |
| WDR65      | 19.3455474 | -1.5841323 | 0.02355919 | 0.12071447 |
| CBWD1      | 210.499743 | 0.56859236 | 0.023586   | 0.12081579 |
| THSD7A     | 125.531228 | 0.97267418 | 0.02359854 | 0.12084394 |
| ITFG3      | 1327.4748  | -0.597401  | 0.02360755 | 0.12085405 |
| SMYD3      | 125.714848 | -0.5377024 | 0.02363466 | 0.12095677 |
| SLC25A51   | 301.791015 | -0.6849255 | 0.02364362 | 0.12096656 |
| PIK3C2A    | 3959.44502 | 0.57039223 | 0.02366326 | 0.12103095 |
| GLO1       | 1354.29578 | 0.54686339 | 0.0236901  | 0.12113211 |
| ACTG1      | 32942.7805 | -0.5572906 | 0.02373316 | 0.12113579 |
| C14orf132  | 482.024408 | 1.36556276 | 0.02371128 | 0.12113579 |
| CXXC4      | 247.726625 | 1.54549481 | 0.02371855 | 0.12113579 |
| SAMD9L     | 1943.27067 | 0.57203897 | 0.02369798 | 0.12113579 |
| SLC39A10   | 1630.60638 | -0.5749343 | 0.0237251  | 0.12113579 |
| TNFRSF25   | 75.0488027 | 1.04456724 | 0.02373282 | 0.12113579 |
| ARHGEF2    | 2095.69655 | -0.6404723 | 0.02376439 | 0.12124621 |
| IFT22      | 305.015859 | 0.60148785 | 0.02376892 | 0.12124621 |
| ZNF559     | 558.81125  | 0.56605373 | 0.02378576 | 0.12129608 |
| AKR1A1     | 593.404365 | 0.49594283 | 0.02380777 | 0.12131395 |
| GPR132     | 118.761548 | 1.0818909  | 0.02380593 | 0.12131395 |
| IQCH       | 46.0782348 | 0.86786843 | 0.02381754 | 0.12131395 |
| OXNAD1     | 271.157326 | -0.7326556 | 0.02381408 | 0.12131395 |
| SLC23A2    | 4256.7663  | 0.89323167 | 0.02385196 | 0.12145323 |
| GLMN       | 105.586331 | 0.82521149 | 0.02386782 | 0.12149797 |
| ZNF568     | 398.338529 | 0.56713421 | 0.02390917 | 0.12167239 |
| SLC2A9     | 106.615996 | 1.12818591 | 0.0239309  | 0.12174688 |
| CDC7       | 90.2240093 | -1.1286044 | 0.02394726 | 0.12179398 |
| TRIM61     | 35.4307591 | 0.72632855 | 0.02397851 | 0.12191682 |
| DOCK8      | 1528.64982 | 0.84044261 | 0.02399269 | 0.12195276 |
| KLHL21     | 387.588477 | 0.82980323 | 0.024018   | 0.12204527 |
| ZDHHC1     | 137.298785 | 0.66199367 | 0.02411026 | 0.12247783 |
| ITGA9      | 491.021642 | 0.89596245 | 0.02411909 | 0.12248643 |
| CLEC2D     | 426.33392  | 0.68846615 | 0.02418862 | 0.1228032  |
| HDAC9      | 669.188001 | 1.36942747 | 0.02421357 | 0.1228775  |
| MYCBP2     | 4961.21257 | 0.52255886 | 0.02421757 | 0.1228775  |
| LOC1005073 | 60.6698513 | 0.5871773  | 0.02425624 | 0.12300606 |
| OVGP1      | 54.8508969 | 1.12317859 | 0.02425724 | 0.12300606 |
| NAGPA      | 137.122259 | 0.3750841  | 0.02430532 | 0.12321349 |
| MIPEPP3    | 43.4958824 | 0.96568341 | 0.02433253 | 0.12331499 |
| C6orf226   | 39.5742938 | -1.0059035 | 0.02438344 | 0.12353651 |
| EMP3       | 860.262783 | -0.9306679 | 0.02441276 | 0.12364857 |
| ANKRD18A   | 48.267087  | -1.668472  | 0.02445847 | 0.12373417 |
| CRLF3      | 289.19789  | 0.55242541 | 0.02444143 | 0.12373417 |
| IFI44      | 359.146368 | 0.72808702 | 0.02444522 | 0.12373417 |
| MGST1      | 30.1602919 | -1.478711  | 0.02445849 | 0.12373417 |
| KDM8       | 151.611721 | 0.74226659 | 0.02447353 | 0.12377375 |
| GTF3C1     | 2840.26657 | -0.3233081 | 0.0244952  | 0.12377569 |
| HSD11B1    | 32.3507287 | 1.67025075 | 0.02449554 | 0.12377569 |
| SNORA80B   | 8.64007681 | 1.22763989 | 0.02449451 | 0.12377569 |

|            |            |            |            |            |
|------------|------------|------------|------------|------------|
| ZC3H18     | 645.940103 | -0.5787598 | 0.02451665 | 0.12384587 |
| GMPS       | 957.94038  | -0.4257725 | 0.02452995 | 0.12387662 |
| CYS1       | 291.213277 | 1.60608066 | 0.02454576 | 0.12392    |
| CCDC30     | 51.2893733 | 0.88039421 | 0.02456108 | 0.12394201 |
| NRIP2      | 12.4944244 | 1.46931014 | 0.02456456 | 0.12394201 |
| CYTIP      | 138.430539 | 1.07554155 | 0.02457777 | 0.12397223 |
| ESAM       | 177.806821 | 1.19970977 | 0.02461648 | 0.1240217  |
| LAMA5      | 7079.05707 | -1.3265587 | 0.02461472 | 0.1240217  |
| OSBPL9     | 1243.47037 | 0.46937817 | 0.0246134  | 0.1240217  |
| TGIF2      | 431.934659 | -0.6716672 | 0.02460211 | 0.1240217  |
| LOC90834   | 53.5089183 | 0.63705584 | 0.0246269  | 0.12403778 |
| CECR5      | 232.732008 | -0.766879  | 0.02465033 | 0.12411232 |
| LOC1001313 | 6.45910027 | -1.121521  | 0.02465616 | 0.12411232 |
| TANC1      | 1622.42134 | -0.7258826 | 0.02470578 | 0.12432562 |
| APBB3      | 517.580532 | 0.57933845 | 0.02471825 | 0.12435193 |
| CTAGE5     | 526.116269 | 0.51554062 | 0.02479448 | 0.12469887 |
| CREB5      | 458.670201 | 1.23622077 | 0.02485073 | 0.12490858 |
| PRPS2      | 339.327308 | -0.4021696 | 0.02484459 | 0.12490858 |
| FAM134C    | 1584.62294 | 0.40534106 | 0.02486992 | 0.1249421  |
| NAT8L      | 138.67939  | -1.0702856 | 0.02487196 | 0.1249421  |
| CRTAM      | 12.7348116 | 1.34322426 | 0.02490282 | 0.12502394 |
| ZNF610     | 112.086187 | 0.86801758 | 0.02489889 | 0.12502394 |
| GPKOW      | 315.332078 | 0.31181602 | 0.02492279 | 0.12502533 |
| STK32A     | 293.083535 | 1.60082946 | 0.02492005 | 0.12502533 |
| TRPV2      | 140.99804  | 0.90287285 | 0.02492495 | 0.12502533 |
| PDZD11     | 427.803798 | -0.4925725 | 0.02493799 | 0.1250542  |
| PLEKHG4B   | 1957.65528 | -0.9981201 | 0.02494767 | 0.12506623 |
| PSMD4      | 1121.19094 | -0.3774602 | 0.02498721 | 0.12522788 |
| XPO6       | 1988.62672 | -0.3912595 | 0.02499876 | 0.1252492  |
| ARPP21     | 1.95169792 | -1.6873966 | 0.02500987 | 0.12526828 |
| PARP8      | 1111.09827 | 0.55643567 | 0.02503271 | 0.12530958 |
| RCC2       | 1186.14503 | -0.5397347 | 0.02502607 | 0.12530958 |
| TBCC       | 212.061983 | 0.55872595 | 0.02507826 | 0.12550098 |
| ABCC8      | 2.04990705 | -1.6770053 | 0.02509469 | 0.12552016 |
| SCG2       | 399.41769  | 1.66802841 | 0.02509672 | 0.12552016 |
| OXR1       | 1163.70182 | 0.45863168 | 0.0251311  | 0.12565552 |
| BBS9       | 936.956266 | 1.09904837 | 0.02515309 | 0.12571805 |
| RANBP3     | 783.061655 | 0.38852463 | 0.02515826 | 0.12571805 |
| LRRC69     | 13.6372815 | 1.10531897 | 0.0252418  | 0.12598879 |
| SLC4A10    | 17.442999  | 1.59972781 | 0.02523401 | 0.12598879 |
| USP51      | 181.432899 | 0.73650957 | 0.02523085 | 0.12598879 |
| ZC3H7A     | 1956.31995 | 0.6338003  | 0.02524144 | 0.12598879 |
| RASL10A    | 4.20208097 | -1.4779756 | 0.02529171 | 0.12620123 |
| DFFB       | 96.3980689 | 0.51313945 | 0.02531566 | 0.12620272 |
| GADD45G    | 126.929347 | 1.48335622 | 0.02531955 | 0.12620272 |
| JUN        | 4416.65788 | 0.83898506 | 0.02532142 | 0.12620272 |
| ZBED3-AS1  | 26.5751922 | -1.198725  | 0.02531306 | 0.12620272 |
| LSM3       | 401.82646  | -0.3524726 | 0.02532921 | 0.12620488 |
| FGF20      | 5.43691713 | 1.56462587 | 0.02534497 | 0.12624677 |
| ARPC1B     | 2009.93437 | -0.6283106 | 0.02535636 | 0.1262669  |

|            |            |            |            |            |
|------------|------------|------------|------------|------------|
| PPP1R18    | 2.60965665 | -1.674726  | 0.02538344 | 0.12636507 |
| CREB3L1    | 317.835576 | -1.4801669 | 0.02543866 | 0.12641999 |
| FAR2P2     | 13.6430701 | 1.50825028 | 0.02542585 | 0.12641999 |
| KIAA0825   | 328.783856 | 0.87128179 | 0.02543426 | 0.12641999 |
| LMBRD2     | 544.620971 | 0.73767504 | 0.02543852 | 0.12641999 |
| MTUS2      | 72.1951313 | -1.6060919 | 0.02542705 | 0.12641999 |
| RGP1       | 486.318403 | -0.6549979 | 0.02541397 | 0.12641999 |
| PLS1       | 209.2909   | 1.4175343  | 0.02545145 | 0.12642853 |
| SLC45A2    | 2.00544564 | 1.6614697  | 0.02545511 | 0.12642853 |
| SUPT6H     | 2924.84932 | -0.3251265 | 0.02547755 | 0.12650338 |
| AKR1C1     | 250.700384 | -1.3083964 | 0.02553141 | 0.12673416 |
| NEXN-AS1   | 14.4048247 | 1.34144111 | 0.02555881 | 0.12683348 |
| ANAPC1     | 1151.85734 | -0.3898159 | 0.02558314 | 0.12690866 |
| SEMA3F     | 649.554657 | 1.12330329 | 0.02558875 | 0.12690866 |
| MCTP2      | 236.214807 | -1.2418453 | 0.02560158 | 0.12693564 |
| LPCAT3     | 594.317772 | 0.73879031 | 0.02561332 | 0.12695714 |
| RBM33      | 2333.41263 | -0.4134326 | 0.02562912 | 0.12699882 |
| SATB1      | 275.247201 | 0.68767578 | 0.02565097 | 0.12703375 |
| USP39      | 568.904615 | -0.3243568 | 0.02564412 | 0.12703375 |
| TIMM8A     | 83.3041612 | -0.5879519 | 0.02571927 | 0.1273189  |
| ZBTB5      | 569.849834 | -0.6424625 | 0.02572339 | 0.1273189  |
| NFRKB      | 730.610114 | -0.4690039 | 0.02573894 | 0.12732243 |
| PTCH1      | 990.803022 | -1.315386  | 0.02573168 | 0.12732243 |
| TMEM43     | 2616.43893 | -0.5088109 | 0.02581199 | 0.12764702 |
| OR6W1P     | 2.25852763 | -1.5033544 | 0.02582606 | 0.12767133 |
| RBP7       | 37.0191234 | 1.26518191 | 0.02583178 | 0.12767133 |
| CASP6      | 136.951308 | 0.5694236  | 0.02586577 | 0.12769223 |
| FKBP7      | 383.905451 | -1.030166  | 0.02584768 | 0.12769223 |
| NCAPD2     | 815.706685 | -0.5994845 | 0.02586562 | 0.12769223 |
| SYMPK      | 1344.98737 | -0.4490296 | 0.02585235 | 0.12769223 |
| FKBP10     | 3438.96075 | -0.7813434 | 0.02587763 | 0.12771405 |
| JUNB       | 3138.96912 | 1.25069394 | 0.0259438  | 0.12796704 |
| LOC1027248 | 66.6326519 | 0.76429939 | 0.02593778 | 0.12796704 |
| PPM1F      | 723.665303 | 0.43089688 | 0.02596946 | 0.1280568  |
| LAD1       | 8.68742698 | -1.4852445 | 0.02601047 | 0.12815582 |
| MAGOH2     | 5.89019086 | 1.40339094 | 0.02601194 | 0.12815582 |
| RNF180     | 355.07037  | 1.28835177 | 0.02599966 | 0.12815582 |
| DNAL1      | 565.682899 | 0.66516687 | 0.02602482 | 0.12818252 |
| ALMS1P     | 6.16122474 | 1.374413   | 0.02605627 | 0.12826397 |
| SNORA22    | 103.059249 | -1.1490792 | 0.0260563  | 0.12826397 |
| ATG9B      | 4.67027535 | -1.5924296 | 0.0260965  | 0.12831465 |
| CANT1      | 725.896712 | -0.4223321 | 0.02607921 | 0.12831465 |
| SCAMP3     | 795.280732 | -0.5737237 | 0.02609183 | 0.12831465 |
| SFXN4      | 220.447004 | -0.5353343 | 0.02608244 | 0.12831465 |
| CERS2      | 4215.18779 | -0.4345053 | 0.02611412 | 0.1283645  |
| ADA        | 63.2518246 | -1.0087589 | 0.0261407  | 0.12844468 |
| RPL29      | 3887.85456 | 0.46672564 | 0.0261454  | 0.12844468 |
| NLN        | 394.500293 | -0.8078809 | 0.02616026 | 0.12848093 |
| SFRP2      | 41707.8196 | 1.47465168 | 0.026186   | 0.12857056 |
| ARRDC4     | 467.391468 | -0.9155791 | 0.02620015 | 0.12860235 |

|           |            |            |            |            |
|-----------|------------|------------|------------|------------|
| ZDHHC16   | 401.75251  | -0.5469359 | 0.02620746 | 0.12860235 |
| ZDHHC24   | 135.919197 | -0.5357825 | 0.02622157 | 0.12863482 |
| FUZ       | 174.190677 | 0.42017571 | 0.02630277 | 0.12895948 |
| LACC1     | 275.261748 | 0.79940869 | 0.02629867 | 0.12895948 |
| DCUN1D3   | 390.311162 | 0.82484351 | 0.02634261 | 0.12908268 |
| MAP7D2    | 76.4642795 | -1.5906929 | 0.02634294 | 0.12908268 |
| REXO4     | 308.222388 | -0.3082616 | 0.02638149 | 0.12923468 |
| PPARGC1A  | 1894.66524 | -1.3000908 | 0.02640196 | 0.12926116 |
| TMC3      | 8.41433983 | 1.66914704 | 0.02639777 | 0.12926116 |
| CSNK2A3   | 9.60357036 | -0.9957657 | 0.02642237 | 0.12927083 |
| DNALI1    | 102.169497 | 1.44579352 | 0.02642653 | 0.12927083 |
| ZNF440    | 248.225268 | 0.81519304 | 0.02641983 | 0.12927083 |
| BBS10     | 518.495246 | 0.53117501 | 0.02644015 | 0.12930064 |
| ISLR2     | 30.7779381 | -1.367892  | 0.02646567 | 0.12938856 |
| AP3S2     | 81.5564471 | -0.6235705 | 0.02647601 | 0.12940225 |
| RNF212    | 44.1883726 | -1.6223122 | 0.02650577 | 0.12951083 |
| LINC00152 | 50.8115421 | -1.0324013 | 0.02651363 | 0.12951235 |
| ATG4C     | 217.898581 | 0.64656743 | 0.02653973 | 0.12956056 |
| EDN1      | 56.965399  | 1.2997794  | 0.02654374 | 0.12956056 |
| MYO5B     | 1328.13786 | 1.18353227 | 0.02655369 | 0.12956056 |
| STK16     | 251.32778  | -0.4490402 | 0.0265524  | 0.12956056 |
| SLMAP     | 1525.43957 | 0.66903236 | 0.02657346 | 0.12962021 |
| SUV39H2   | 132.940142 | -0.5622442 | 0.02659176 | 0.12967262 |
| SNX32     | 21.8722173 | -0.9711555 | 0.02663838 | 0.12986306 |
| DHODH     | 104.570369 | -0.4709834 | 0.02665585 | 0.12991134 |
| CCR7      | 13.5279392 | 1.31040322 | 0.0266673  | 0.12991759 |
| LILRB5    | 52.9301036 | -1.5255227 | 0.02667984 | 0.12991759 |
| SCARB2    | 3846.51033 | 0.40179017 | 0.02667685 | 0.12991759 |
| ENPP5     | 220.48256  | 1.10542441 | 0.0267351  | 0.13014975 |
| TVP23A    | 17.6534017 | 1.40199166 | 0.02678507 | 0.13035601 |
| LINC00896 | 13.5704273 | -1.2769872 | 0.02682747 | 0.13041994 |
| PUF60     | 1089.98139 | -0.4332241 | 0.02682859 | 0.13041994 |
| SOCS2     | 219.797799 | 1.44103771 | 0.02682429 | 0.13041994 |
| TTC33     | 514.276452 | 0.64700227 | 0.02681242 | 0.13041994 |
| LINC01277 | 2.90527799 | 1.44328987 | 0.02683697 | 0.1304237  |
| TMEM234   | 151.02528  | 0.71607529 | 0.02685889 | 0.13049331 |
| TMEM132B  | 68.2330179 | 1.315333   | 0.02686957 | 0.13050827 |
| SEN7      | 1085.10825 | 0.4474892  | 0.02688877 | 0.13056456 |
| C1QTNF3   | 60.8695067 | 0.97593585 | 0.0269152  | 0.13063138 |
| FAM212A   | 48.031838  | 1.29132624 | 0.02691775 | 0.13063138 |
| CAPS2     | 124.628869 | 0.74847731 | 0.02693345 | 0.13067062 |
| LRP8      | 285.24082  | 1.1706754  | 0.02698131 | 0.13082888 |
| QRFPR     | 39.2306598 | 1.66926607 | 0.02697481 | 0.13082888 |
| ZFP91     | 1530.58333 | -0.3298531 | 0.02699992 | 0.13088212 |
| IRF5      | 285.578808 | 1.0224387  | 0.02701096 | 0.13089867 |
| AGER      | 3.16438148 | -1.6141216 | 0.02703827 | 0.13099405 |
| ACSL1     | 1313.77681 | 1.01195718 | 0.02710801 | 0.1310128  |
| AFAP1L1   | 4169.02289 | 0.86163724 | 0.02711083 | 0.1310128  |
| C3        | 9254.67645 | 1.19511277 | 0.02710756 | 0.1310128  |
| MZT2B     | 502.762536 | -0.5270393 | 0.02708555 | 0.1310128  |

|            |            |            |            |            |
|------------|------------|------------|------------|------------|
| PRDM1      | 225.177299 | 0.9282395  | 0.02708356 | 0.1310128  |
| RFX3       | 493.634022 | 0.80406698 | 0.02705874 | 0.1310128  |
| SLC35A1    | 643.355725 | 0.55752043 | 0.02707403 | 0.1310128  |
| SMAD6      | 360.050339 | -0.8987057 | 0.02709013 | 0.1310128  |
| UNG        | 535.857989 | -0.6438963 | 0.02707006 | 0.1310128  |
| BLOC1S3    | 174.09414  | -0.5392464 | 0.02713983 | 0.13106548 |
| DNPEP      | 474.141319 | -0.4698825 | 0.02716632 | 0.13106548 |
| DTX4       | 852.738061 | -1.0341675 | 0.02713854 | 0.13106548 |
| GPC5-AS1   | 249.442443 | 1.59342807 | 0.02716367 | 0.13106548 |
| KRTCAP2    | 750.664643 | -0.6076181 | 0.02714743 | 0.13106548 |
| PLCD4      | 800.455278 | 0.7668688  | 0.02716755 | 0.13106548 |
| CHCHD4     | 172.180228 | -0.6123519 | 0.02718518 | 0.1311137  |
| SRP68      | 1098.02446 | -0.636997  | 0.02720408 | 0.13116801 |
| CD300C     | 58.9807403 | 1.16835366 | 0.02723576 | 0.13128385 |
| FGFR1OP    | 307.470044 | 0.67955951 | 0.02724723 | 0.13130227 |
| LINC00342  | 759.532764 | -0.6420252 | 0.02726457 | 0.13134894 |
| RPL23AP82  | 62.6364037 | 1.0764939  | 0.02729769 | 0.13147161 |
| CISD3      | 225.357964 | -0.509055  | 0.02734705 | 0.13156168 |
| CORIN      | 34.8153773 | 1.51714991 | 0.02734232 | 0.13156168 |
| LOC1019270 | 51.4485325 | 1.43626763 | 0.02734171 | 0.13156168 |
| RFC4       | 157.228085 | -0.6930188 | 0.0273371  | 0.13156168 |
| C1orf116   | 3.39676163 | -1.3928775 | 0.02735667 | 0.13157111 |
| LRRC66     | 20.2623066 | 1.08957928 | 0.0273754  | 0.13162431 |
| LSM10      | 142.962134 | -0.7907901 | 0.02743494 | 0.13187363 |
| C14orf39   | 95.5006064 | 1.35746582 | 0.02745445 | 0.13189356 |
| MED30      | 107.568864 | 0.70095221 | 0.02744688 | 0.13189356 |
| NME8       | 7.75790777 | 1.41420249 | 0.027487   | 0.13201298 |
| TAB2       | 2432.58114 | 0.43665428 | 0.02752005 | 0.13213472 |
| TMED4      | 765.373246 | 0.51285566 | 0.02753829 | 0.13218535 |
| GET4       | 320.717127 | -0.4177681 | 0.02761662 | 0.1324132  |
| MAP3K11    | 741.832891 | -0.5812926 | 0.02761243 | 0.1324132  |
| RPL5       | 6154.23266 | 0.48025197 | 0.02761514 | 0.1324132  |
| SCYL1      | 1259.36662 | -0.3881733 | 0.02760114 | 0.1324132  |
| BTBD1      | 1867.4037  | -0.5804158 | 0.02763972 | 0.13248695 |
| PKM        | 15583.0573 | -0.9714631 | 0.02766943 | 0.13259234 |
| RCBTB2     | 1125.61826 | 0.6596535  | 0.02769542 | 0.13267985 |
| NEFL       | 1401.28629 | -1.6608735 | 0.02773898 | 0.13285143 |
| CBR1       | 639.048291 | -0.5545544 | 0.02781971 | 0.13320092 |
| MNAT1      | 362.267605 | 0.47803373 | 0.02786954 | 0.13340228 |
| KIAA1586   | 334.583691 | 0.56271904 | 0.02789848 | 0.1335036  |
| ANKDD1A    | 183.163574 | -1.1799002 | 0.02792978 | 0.13361613 |
| CDK2       | 525.918871 | -0.7326746 | 0.02796    | 0.1336482  |
| CIRH1A     | 429.301974 | -0.7099105 | 0.02796763 | 0.1336482  |
| PPAPDC2    | 237.863896 | 0.57454335 | 0.02794818 | 0.1336482  |
| PRKG1      | 555.71171  | 1.28666253 | 0.02795916 | 0.1336482  |
| TAF9B      | 528.672341 | 0.52025293 | 0.02798084 | 0.1336741  |
| DACT2      | 89.1474824 | 1.42153642 | 0.02802725 | 0.13378412 |
| INMT-FAM18 | 10.4732269 | 1.64401517 | 0.02801988 | 0.13378412 |
| VIPR2      | 158.59896  | -1.6433324 | 0.02802128 | 0.13378412 |
| CASKIN1    | 104.46023  | -0.7537211 | 0.02806546 | 0.133817   |

|            |            |            |            |            |
|------------|------------|------------|------------|------------|
| CCDC136    | 223.471054 | 1.26977933 | 0.02806607 | 0.133817   |
| LOC1027241 | 3.21777412 | -1.5428824 | 0.02805773 | 0.133817   |
| MYLIP      | 546.139625 | 0.68728661 | 0.02807311 | 0.133817   |
| PRADC1     | 201.696351 | -0.6954742 | 0.02804637 | 0.133817   |
| C1orf145   | 31.1917885 | -1.131913  | 0.02812339 | 0.13401944 |
| CRADD      | 130.732189 | 0.41135568 | 0.02815076 | 0.13409187 |
| FADS1      | 1189.48804 | -1.0202866 | 0.02815421 | 0.13409187 |
| ANKRD24    | 65.7244286 | -0.9230789 | 0.02818399 | 0.13412204 |
| OR52N4     | 27.7441441 | 1.29932704 | 0.0281807  | 0.13412204 |
| PLIN1      | 8.68560759 | 1.16312263 | 0.02817369 | 0.13412204 |
| TBC1D10B   | 724.446631 | -0.4377486 | 0.02819301 | 0.13412775 |
| TMEM71     | 53.0735749 | 1.09794379 | 0.02823322 | 0.13428185 |
| PDE2A      | 127.35219  | 1.32342593 | 0.02826323 | 0.13438734 |
| GIMAP2     | 131.443311 | 0.87479607 | 0.02832917 | 0.13462632 |
| UBE2O      | 864.288907 | -0.3691834 | 0.02832301 | 0.13462632 |
| NFIL3      | 355.367879 | 1.31830098 | 0.02836658 | 0.13476676 |
| VPS4B      | 985.355189 | 0.52913073 | 0.02842384 | 0.13500144 |
| ARHGEF10   | 1909.08057 | -0.5098635 | 0.02844555 | 0.13506721 |
| SLC35E2    | 556.362969 | 1.06552901 | 0.02847378 | 0.13516383 |
| LEMD3      | 849.021618 | 0.38909292 | 0.02851856 | 0.13533899 |
| CCDC15     | 69.708332  | -0.9672936 | 0.02855687 | 0.13546605 |
| LAMTOR4    | 511.833589 | 0.39908139 | 0.02856112 | 0.13546605 |
| XKRX       | 10.6500589 | 1.30137603 | 0.02857107 | 0.1354758  |
| DESI2      | 867.904316 | -0.4899349 | 0.02858549 | 0.13550674 |
| HSPB2      | 225.184373 | 0.72719037 | 0.02860982 | 0.13558466 |
| NPNT       | 11960.2101 | 1.27556737 | 0.0286597  | 0.13578354 |
| CREM       | 560.990565 | 1.01392091 | 0.02871761 | 0.13598284 |
| ZNF493     | 1224.76476 | 0.86554112 | 0.02871684 | 0.13598284 |
| TARS2      | 356.87216  | -0.4595845 | 0.02874499 | 0.13607493 |
| ATP5SL     | 314.964929 | -0.4831649 | 0.02878006 | 0.13609613 |
| SNORA18    | 25.5494916 | -0.855191  | 0.02877618 | 0.13609613 |
| ST7L       | 287.136146 | 0.47252547 | 0.02876221 | 0.13609613 |
| TLCD1      | 14.4225947 | -1.2810642 | 0.02878118 | 0.13609613 |
| GLTSCR1L   | 888.843743 | 0.52405472 | 0.02883105 | 0.13629442 |
| FAM87B     | 3.57163246 | 1.55573071 | 0.02886168 | 0.13631086 |
| KIAA1024   | 105.269617 | -1.0363404 | 0.02884421 | 0.13631086 |
| LRRC45     | 144.190883 | -0.7603254 | 0.02887416 | 0.13631086 |
| TTC39A     | 5.70290568 | 1.64882954 | 0.02887424 | 0.13631086 |
| ZIC1       | 4255.64441 | -1.3202826 | 0.02885702 | 0.13631086 |
| DPM3       | 133.977371 | -0.6792899 | 0.0289153  | 0.13643431 |
| LINC01237  | 9.10961057 | 1.34948229 | 0.02893218 | 0.13643431 |
| MBNL3      | 1226.50627 | 1.02023306 | 0.02892968 | 0.13643431 |
| ST5        | 902.081063 | 0.58403547 | 0.02893192 | 0.13643431 |
| ABI2       | 1870.94608 | -0.3357621 | 0.02894297 | 0.1364477  |
| ZBP1       | 9.30704164 | 1.2666733  | 0.02896144 | 0.13649729 |
| GBP4       | 325.935581 | 0.94243693 | 0.02897535 | 0.13652535 |
| PHYHD1     | 104.591747 | 1.11681945 | 0.02899226 | 0.13656753 |
| CYB5A      | 780.933287 | 0.93603594 | 0.02901309 | 0.13662817 |
| HOGA1      | 169.504494 | 1.15479519 | 0.02904634 | 0.13674725 |
| ACBD7      | 67.3037957 | -1.347143  | 0.02905847 | 0.13675575 |

|            |            |            |            |            |
|------------|------------|------------|------------|------------|
| HDX        | 159.709148 | 0.43809115 | 0.02906408 | 0.13675575 |
| DKC1       | 588.021589 | -0.4858267 | 0.02908213 | 0.13676569 |
| KLHL9      | 1313.93123 | 1.06148808 | 0.02907877 | 0.13676569 |
| SEPT6      | 1474.79325 | -1.0533407 | 0.02916452 | 0.13711556 |
| UBXN8      | 138.735251 | 0.48534547 | 0.02920659 | 0.13727575 |
| POM121     | 1079.35349 | -0.5461447 | 0.02932237 | 0.13778221 |
| RALGDS     | 1209.64435 | -0.4151705 | 0.02933668 | 0.13781176 |
| MAT2A      | 2492.74617 | -0.3821451 | 0.02935323 | 0.13785176 |
| WLS        | 2233.63999 | 0.78497711 | 0.02937384 | 0.1379108  |
| SRPK3      | 3.32314113 | 1.64154756 | 0.02939411 | 0.13796823 |
| RASSF5     | 390.038739 | 0.82024616 | 0.02944939 | 0.13818993 |
| CHN1       | 779.871265 | 0.93226165 | 0.02949043 | 0.13828636 |
| GPRASP2    | 31.3131175 | 0.94045916 | 0.02950039 | 0.13828636 |
| LINC00909  | 244.442706 | 0.61643761 | 0.02948723 | 0.13828636 |
| SDC1       | 355.6093   | -0.9195655 | 0.02950216 | 0.13828636 |
| CLGN       | 10.9253742 | -1.4063885 | 0.0296497  | 0.13860568 |
| GPR108     | 496.57534  | 0.60879787 | 0.02959653 | 0.13860568 |
| IFI6       | 890.499067 | 0.51583101 | 0.02961305 | 0.13860568 |
| ITCH       | 2144.30184 | 0.2721853  | 0.02962509 | 0.13860568 |
| KDM1A      | 931.967973 | 0.43768739 | 0.0296453  | 0.13860568 |
| LOC1019274 | 4.5231065  | -1.6410688 | 0.02964569 | 0.13860568 |
| MIAT       | 721.42023  | -1.1537405 | 0.02959422 | 0.13860568 |
| PEF1       | 689.382234 | 0.51640217 | 0.02959693 | 0.13860568 |
| ZNF579     | 126.261602 | -0.7495035 | 0.02965104 | 0.13860568 |
| ZNF771     | 53.5574076 | -0.6989764 | 0.02963628 | 0.13860568 |
| NLRP1      | 495.597859 | 1.0250919  | 0.02967439 | 0.1386771  |
| LRRTM4     | 2.8213555  | -1.5418185 | 0.02969362 | 0.13872918 |
| ZNF257     | 55.9035073 | 1.30597889 | 0.02971276 | 0.13878081 |
| PPP2R2B    | 33.831583  | 1.50914771 | 0.02972884 | 0.13881814 |
| NSUN7      | 87.6415093 | -0.9367011 | 0.02975914 | 0.13892186 |
| COX6B1     | 1377.03411 | -0.576102  | 0.02983018 | 0.13909406 |
| LINC00907  | 5.53591265 | 1.50575205 | 0.02983655 | 0.13909406 |
| LOC1019273 | 14.4619229 | 1.44690235 | 0.02983122 | 0.13909406 |
| NPRL3      | 509.796798 | -0.6545911 | 0.02983144 | 0.13909406 |
| SLC39A1    | 1570.04082 | -0.4744396 | 0.0298194  | 0.13909406 |
| LOC1019285 | 15.4658728 | 1.18323772 | 0.02993591 | 0.13948152 |
| NRP2       | 5162.38172 | 1.1563006  | 0.02993015 | 0.13948152 |
| ARL6       | 105.844866 | 0.77480496 | 0.02995652 | 0.13953966 |
| GATAD2B    | 1500.56118 | -0.4570724 | 0.02998419 | 0.1395928  |
| PSMB4      | 1583.25293 | -0.3192791 | 0.02997722 | 0.1395928  |
| EIF2B4     | 293.842058 | -0.39263   | 0.03000819 | 0.13966662 |
| FAM189A2   | 40.2252289 | 1.26173822 | 0.03005428 | 0.13984323 |
| ZFP64      | 451.008339 | -0.5135408 | 0.03006943 | 0.13987582 |
| SLCO4A1    | 76.0493673 | -1.4866546 | 0.03009536 | 0.13995852 |
| MALL       | 12.7561198 | 1.35574886 | 0.03010481 | 0.13996452 |
| CSGALNACT1 | 273.654587 | 0.85349016 | 0.0301489  | 0.14000521 |
| DLL3       | 11.880609  | -1.3346865 | 0.03013809 | 0.14000521 |
| P4HTM      | 381.926314 | 0.68311662 | 0.03013093 | 0.14000521 |
| PEX5L      | 38.6329417 | -1.4097299 | 0.03015434 | 0.14000521 |
| TMED8      | 106.753209 | 0.56770162 | 0.0301449  | 0.14000521 |

|            |            |            |            |            |
|------------|------------|------------|------------|------------|
| HRSP12     | 110.533537 | -0.5449295 | 0.03018599 | 0.14011427 |
| GIPC2      | 11.8158659 | 1.20777786 | 0.03022354 | 0.14025062 |
| RPS6KA5    | 94.2354685 | 0.79745007 | 0.03024296 | 0.14030282 |
| PCOLCE2    | 189.30952  | 1.35100419 | 0.03026567 | 0.14037021 |
| EOGT       | 528.415293 | 0.77688831 | 0.03029811 | 0.14044481 |
| KPNB1      | 4314.68839 | -0.3644147 | 0.03029481 | 0.14044481 |
| FEM1C      | 956.58026  | 0.60204713 | 0.03032832 | 0.14051646 |
| WHAMMP3    | 174.056069 | 0.58296735 | 0.03032994 | 0.14051646 |
| NPHP3-ACAD | 149.883974 | 0.6521908  | 0.03036817 | 0.14065561 |
| EGFLAM-AS2 | 2.43277288 | 1.59904153 | 0.03040482 | 0.14070391 |
| OR7E14P    | 2.62546388 | 1.61320882 | 0.03039694 | 0.14070391 |
| SLC35C1    | 445.537675 | -0.4273831 | 0.03039074 | 0.14070391 |
| ZNF35      | 233.690519 | 0.55433268 | 0.03041139 | 0.14070391 |
| IAH1       | 363.032966 | -0.3565164 | 0.03043558 | 0.14073995 |
| KIF26B     | 49.6545202 | 1.3736424  | 0.03043479 | 0.14073995 |
| LINC00472  | 677.322576 | 1.32664104 | 0.03045669 | 0.14076173 |
| ZNF540     | 171.702431 | 1.01266104 | 0.03045132 | 0.14076173 |
| NID2       | 8731.96137 | -0.7621195 | 0.03047953 | 0.14082937 |
| EVC2       | 312.135822 | 0.78032594 | 0.03055327 | 0.14109414 |
| SFTPD      | 7.56664619 | 1.60213006 | 0.03055181 | 0.14109414 |
| SNORA40    | 8.92475831 | -0.8862205 | 0.0305895  | 0.14122342 |
| MSL3       | 379.366943 | 0.49233552 | 0.03061591 | 0.14130735 |
| C5orf45    | 208.13965  | 0.56829201 | 0.03064027 | 0.14138177 |
| CCDC89     | 41.6921485 | -1.0306528 | 0.03070151 | 0.14149704 |
| CITED4     | 33.9332195 | 1.17713287 | 0.03071666 | 0.14149704 |
| FAM20B     | 2462.84927 | -0.5586982 | 0.03071841 | 0.14149704 |
| KDM3B      | 2891.46009 | 0.68695637 | 0.03068532 | 0.14149704 |
| NRN1       | 172.087525 | 1.54409456 | 0.03071148 | 0.14149704 |
| SUV39H1    | 109.842635 | -0.6174387 | 0.03070318 | 0.14149704 |
| TMEM115    | 655.152544 | 0.48074732 | 0.03072295 | 0.14149704 |
| TBC1D22A   | 526.545499 | 0.32826417 | 0.03073188 | 0.14150017 |
| LRRRC8E    | 77.7130781 | -1.132514  | 0.03079495 | 0.14175257 |
| CCM2L      | 19.9832095 | 1.19571677 | 0.03083617 | 0.14179512 |
| DOK1       | 313.7758   | 0.56812069 | 0.03084364 | 0.14179512 |
| LINC00663  | 111.973064 | 0.61165693 | 0.03082971 | 0.14179512 |
| METTL2A    | 295.776982 | -0.4357574 | 0.03082975 | 0.14179512 |
| ZIC2       | 3173.58356 | -0.797895  | 0.0308455  | 0.14179512 |
| DRP2       | 6.57269055 | -1.0380962 | 0.03087526 | 0.14189394 |
| SOCS2-AS1  | 4.31004326 | 1.52187355 | 0.03090276 | 0.1419823  |
| CCIN       | 5.93246132 | -1.3696221 | 0.03093266 | 0.14205687 |
| EMC7       | 681.226789 | -0.5966593 | 0.03093554 | 0.14205687 |
| HOXD4      | 4.36194519 | 1.55466401 | 0.03095463 | 0.14210651 |
| DLX6-AS1   | 22.0923722 | -1.6197361 | 0.03098167 | 0.1421926  |
| LOC1019272 | 51.8287675 | 0.56715779 | 0.0310336  | 0.14239285 |
| DMXL2      | 3729.19449 | -0.5227305 | 0.03106209 | 0.14248549 |
| CCDC71L    | 1057.51534 | 0.85578093 | 0.03110101 | 0.14262594 |
| SNAI1      | 26.0403498 | 1.39827047 | 0.03112019 | 0.14267061 |
| STIL       | 103.796619 | -0.9345942 | 0.03112738 | 0.14267061 |
| MCCC2      | 998.787483 | -0.4164844 | 0.03118503 | 0.14285857 |
| SLC25A36   | 1583.09899 | -0.2975911 | 0.03118395 | 0.14285857 |

|             |            |            |            |            |
|-------------|------------|------------|------------|------------|
| MIEF1       | 1020.4694  | -0.6994528 | 0.03121674 | 0.14296568 |
| HERC1       | 6216.5247  | 0.45261224 | 0.03128732 | 0.1432507  |
| GOLGA8A     | 1120.25242 | 0.95142858 | 0.03133911 | 0.14344957 |
| LST1        | 3.21287749 | 1.61090663 | 0.03135257 | 0.14347291 |
| SPATS2      | 442.909043 | -0.6061945 | 0.03140837 | 0.14368993 |
| PRF1        | 36.0560624 | 0.95650616 | 0.03144846 | 0.14383499 |
| SCARNA21    | 347.495923 | 0.64920532 | 0.03145745 | 0.14383782 |
| SPSB2       | 70.4395433 | 0.83910558 | 0.03148812 | 0.1439397  |
| PRTFDC1     | 163.73813  | 0.91660201 | 0.0315005  | 0.14395794 |
| ARHGEF9-IT1 | 1.97134937 | 1.55449977 | 0.03154245 | 0.14395803 |
| FAM26E      | 443.138542 | 1.06016998 | 0.03153776 | 0.14395803 |
| HP1BP3      | 2962.77127 | 0.4794635  | 0.03152428 | 0.14395803 |
| TTC17       | 1992.56439 | 0.36272271 | 0.03153013 | 0.14395803 |
| TTC38       | 224.882014 | 0.39656017 | 0.03151084 | 0.14395803 |
| RAB9A       | 241.086101 | 0.49288436 | 0.03155824 | 0.14399182 |
| GUF1        | 682.090775 | -0.3240397 | 0.03159602 | 0.14412587 |
| KANK3       | 36.9955377 | 1.10433603 | 0.03161022 | 0.14415233 |
| TTC25       | 22.2360119 | 0.8541265  | 0.03167214 | 0.14439636 |
| CD34        | 425.53472  | 1.11382606 | 0.03169314 | 0.14445374 |
| HIST3H2A    | 82.3058981 | -1.103165  | 0.0317947  | 0.14487143 |
| KRT10       | 280.960712 | -0.8322886 | 0.03180166 | 0.14487143 |
| CLPTM1      | 1604.74821 | -0.4605852 | 0.03182793 | 0.14487573 |
| KIAA1456    | 15.5585976 | -1.4845707 | 0.03182229 | 0.14487573 |
| NDUFA13     | 1425.86559 | -0.4488608 | 0.03182257 | 0.14487573 |
| PASK        | 126.143523 | -0.6203485 | 0.03185685 | 0.14496896 |
| CHST3       | 1111.13288 | -0.8434657 | 0.03187131 | 0.14497117 |
| TNFRSF10B   | 1686.5381  | -0.7260185 | 0.03187423 | 0.14497117 |
| FAM71F2     | 119.966731 | 0.77598545 | 0.03188431 | 0.14497857 |
| ZNF329      | 431.882612 | 0.42157448 | 0.0319133  | 0.14507196 |
| TOB2P1      | 12.2935122 | -1.2416201 | 0.03200012 | 0.14542814 |
| FN3KRP      | 481.974211 | -0.556313  | 0.03204984 | 0.14561553 |
| BMPER       | 769.114428 | 1.50682551 | 0.03205931 | 0.14562003 |
| PDE1B       | 86.3139016 | 0.82366368 | 0.03207451 | 0.1456505  |
| RHOF        | 88.4466314 | -1.0815976 | 0.03209262 | 0.14569421 |
| IREB2       | 2433.06495 | -0.6087718 | 0.03212292 | 0.14579321 |
| RNASEH1     | 326.172255 | -0.442349  | 0.03215103 | 0.1458822  |
| LOC1019283  | 2.59491129 | 1.58228533 | 0.03221937 | 0.14615369 |
| SMG5        | 1714.60773 | -0.3994434 | 0.03223383 | 0.14618062 |
| TUBGCP4     | 423.308164 | -0.5183976 | 0.03226196 | 0.14626956 |
| C20orf24    | 130.310474 | -0.9422296 | 0.03229605 | 0.14638547 |
| SYCP2       | 152.456795 | 1.46299579 | 0.03235322 | 0.14660585 |
| C22orf34    | 30.1287166 | 1.10278085 | 0.03237531 | 0.14666726 |
| ABC9        | 60.2257553 | -0.5839908 | 0.03245785 | 0.14684086 |
| ARHGEF33    | 23.0430408 | 1.10479763 | 0.03246717 | 0.14684086 |
| BBC3        | 148.998538 | -0.7235781 | 0.03248728 | 0.14684086 |
| BNC1        | 35.7011631 | 1.58916696 | 0.03249063 | 0.14684086 |
| MRPS25      | 1212.18874 | -0.6140353 | 0.03246868 | 0.14684086 |
| NEK7        | 1349.82792 | 0.44046666 | 0.0324369  | 0.14684086 |
| SRSF3       | 2570.08605 | 0.42102937 | 0.03243614 | 0.14684086 |
| THOC6       | 176.208267 | -0.5329395 | 0.03248905 | 0.14684086 |

|          |            |            |            |            |
|----------|------------|------------|------------|------------|
| UNC13D   | 295.162726 | -0.7737058 | 0.032481   | 0.14684086 |
| FXR1     | 2177.47981 | -0.3740751 | 0.03249924 | 0.14684114 |
| ZKSCAN4  | 118.533143 | 0.41910568 | 0.03250783 | 0.14684129 |
| MIR600HG | 381.840405 | 0.74822419 | 0.03252498 | 0.1468801  |
| HSPG2    | 6103.47653 | 1.00027914 | 0.03254854 | 0.14690998 |
| MTCH1    | 2073.56377 | 0.46382199 | 0.03254871 | 0.14690998 |
| CXCR4    | 801.992694 | 0.9324363  | 0.03258235 | 0.14702314 |
| CD74     | 19282.6427 | 0.91948307 | 0.03260308 | 0.14707801 |
| COL6A3   | 9453.42959 | -1.1237947 | 0.03261785 | 0.14709923 |
| EHD2     | 2331.49733 | -0.7617259 | 0.03265125 | 0.14709923 |
| IL17RE   | 63.8147293 | 1.44020244 | 0.03264486 | 0.14709923 |
| PTPRC    | 1434.42913 | 0.92440972 | 0.0326592  | 0.14709923 |
| TFAP2E   | 22.9034062 | 1.14087902 | 0.03265878 | 0.14709923 |
| UNKL     | 497.427152 | -0.6070652 | 0.0326415  | 0.14709923 |
| TTC21A   | 54.2625262 | 0.9414253  | 0.03268908 | 0.14719517 |
| PKD1     | 7742.51241 | -0.4616228 | 0.0327147  | 0.14727194 |
| SPNS2    | 97.8322836 | 1.02150943 | 0.0327545  | 0.14741242 |
| PAIP1    | 867.78344  | 0.52341451 | 0.03278129 | 0.14746847 |
| ZNF818P  | 266.256066 | 0.83278591 | 0.03278413 | 0.14746847 |
| FGFBP3   | 16.420415  | -1.144492  | 0.03281986 | 0.14758202 |
| GPAA1    | 1056.64554 | -0.5045596 | 0.03283517 | 0.14758202 |
| PNMA6A   | 14.7186516 | 0.87573849 | 0.03283269 | 0.14758202 |
| FAM19A5  | 200.364988 | -1.3430834 | 0.03289707 | 0.14768491 |
| LAT2     | 299.79145  | 0.9060496  | 0.03289185 | 0.14768491 |
| PRNCR1   | 47.8168946 | -0.9703361 | 0.03289243 | 0.14768491 |
| SNHG1    | 463.528231 | -0.654102  | 0.03287074 | 0.14768491 |
| WFDC6    | 3.60440681 | 1.60995372 | 0.03290108 | 0.14768491 |
| SCAF4    | 813.447764 | -0.5933272 | 0.0330092  | 0.14813148 |
| MFSD1    | 1277.06084 | 0.47794819 | 0.03308312 | 0.1484244  |
| ETV7     | 25.8789344 | 1.15033166 | 0.03316342 | 0.14866808 |
| KIAA1147 | 1470.55939 | 0.45873735 | 0.0331468  | 0.14866808 |
| MPC2     | 1590.22471 | -0.7207949 | 0.0331549  | 0.14866808 |
| MT2A     | 381.330153 | -1.2093549 | 0.03317659 | 0.14868829 |
| SERPINE1 | 443.08164  | 1.49305787 | 0.03320369 | 0.1487709  |
| EIF4G3   | 3143.08798 | 0.59925792 | 0.03324205 | 0.14890389 |
| TEC      | 176.38516  | 0.91868999 | 0.03326893 | 0.14895306 |
| TMC4     | 144.369794 | 1.34012252 | 0.03327038 | 0.14895306 |
| OIT3     | 4.17200389 | 1.58003957 | 0.03328639 | 0.1489859  |
| RMST     | 4.95808523 | -1.3572693 | 0.03334895 | 0.149227   |
| BCL9L    | 1620.34382 | -0.4122733 | 0.03339583 | 0.1493978  |
| PARP6    | 1213.07241 | -0.5531421 | 0.03340469 | 0.14939851 |
| ACADL    | 598.018547 | 1.35739331 | 0.03342999 | 0.14947273 |
| CLSTN2   | 26.851297  | -1.1518979 | 0.03347404 | 0.14963071 |
| GABRD    | 11.5719541 | 1.45494857 | 0.0334908  | 0.14966664 |
| AQP1     | 3147.23794 | 1.47664118 | 0.03357957 | 0.14996347 |
| POU3F1   | 3.04718803 | -1.5176644 | 0.03357466 | 0.14996347 |
| RAB28    | 284.00304  | 0.33134857 | 0.03358343 | 0.14996347 |
| COASY    | 645.339214 | -0.5426327 | 0.03360561 | 0.15002349 |
| SLC22A8  | 151.985805 | -1.5832274 | 0.03361735 | 0.15003688 |
| TTC29    | 16.6494292 | -1.5276708 | 0.03364804 | 0.15013481 |

|             |            |            |            |            |
|-------------|------------|------------|------------|------------|
| FAM73A      | 697.978456 | 0.5010335  | 0.03366454 | 0.15016938 |
| GRIA4       | 2.25178589 | -1.4703878 | 0.03369066 | 0.15020784 |
| RPH3AL      | 56.0786422 | 0.84028368 | 0.03368672 | 0.15020784 |
| LINC00852   | 59.3870412 | -0.6451408 | 0.03375757 | 0.15046709 |
| SCAMP5      | 299.959289 | -1.0331073 | 0.0338048  | 0.15063847 |
| EPC1        | 874.560943 | 0.37414011 | 0.03383895 | 0.15075149 |
| ACAD11      | 123.103087 | 0.50479282 | 0.03386992 | 0.15085033 |
| SAP30       | 223.742935 | 0.63055746 | 0.03390174 | 0.15092911 |
| SLC22A1     | 14.1757997 | 1.29286259 | 0.03390519 | 0.15092911 |
| MBOAT2      | 1415.92131 | 0.79945709 | 0.03392776 | 0.15099043 |
| PPP1R3D     | 201.703555 | 0.66070239 | 0.03394235 | 0.15101617 |
| POM121C     | 898.899575 | -0.5405116 | 0.03395406 | 0.15102916 |
| CBL         | 1710.28067 | -0.4691717 | 0.0339788  | 0.15110003 |
| HELQ        | 304.96581  | 0.28345521 | 0.03398784 | 0.15110109 |
| SIX4        | 1029.50498 | 0.76106666 | 0.03401451 | 0.1511805  |
| LIPG        | 16.690069  | 1.42560357 | 0.03408    | 0.1513702  |
| MRAP2       | 231.171244 | 1.57820347 | 0.03408406 | 0.1513702  |
| RPH3A       | 2.86191446 | -1.5034379 | 0.03410128 | 0.1513702  |
| SNORA32     | 26.1782758 | -1.2027714 | 0.03407928 | 0.1513702  |
| ZBTB34      | 485.210174 | -0.4026881 | 0.03409606 | 0.1513702  |
| PLEKHA8P1   | 61.6806004 | 0.86319297 | 0.03411989 | 0.15141363 |
| LINC00933   | 8.04861727 | 1.2374644  | 0.0342006  | 0.15173255 |
| KIF3A       | 655.12718  | 0.82537897 | 0.03423205 | 0.1517544  |
| POLR1C      | 179.291141 | 0.56378356 | 0.03423151 | 0.1517544  |
| TCP11L2     | 340.278628 | 0.66423328 | 0.03422467 | 0.1517544  |
| CEP72       | 73.1222805 | -0.6007049 | 0.03426222 | 0.15184894 |
| FND3A       | 4555.83769 | 0.48926968 | 0.03431124 | 0.15195319 |
| NRL         | 8.95131651 | 0.9821351  | 0.03429574 | 0.15195319 |
| WDR11-AS1   | 8.84831457 | 1.32112582 | 0.0343123  | 0.15195319 |
| SPG20       | 2226.95635 | 0.47520722 | 0.0343436  | 0.1520526  |
| RSRC1       | 440.400821 | -0.4101683 | 0.03436107 | 0.15209072 |
| CDKN2C      | 425.458655 | -0.910188  | 0.03438379 | 0.15215204 |
| DKFZP586I14 | 325.320507 | 0.80392922 | 0.03444213 | 0.15229272 |
| RPS16       | 4490.52304 | -0.9468282 | 0.0344422  | 0.15229272 |
| ZNF728      | 104.714612 | 1.48335431 | 0.03443032 | 0.15229272 |
| PTPRN       | 4.83111092 | -1.5898393 | 0.03445571 | 0.15231324 |
| SEC14L1P1   | 96.1857928 | 0.60289266 | 0.03446607 | 0.15231978 |
| AKR1B1      | 959.93454  | -0.3495849 | 0.03449581 | 0.15241199 |
| C1orf35     | 138.398817 | -0.6015741 | 0.03450504 | 0.15241353 |
| WDTC1       | 992.775087 | 0.51914936 | 0.03454334 | 0.15254348 |
| ENTPD1      | 1033.41078 | 0.95359987 | 0.03455656 | 0.15256258 |
| AOAH-IT1    | 5.71424726 | 1.54063386 | 0.0345949  | 0.1526926  |
| C9orf43     | 10.4146908 | -0.8679429 | 0.03465578 | 0.15271527 |
| EMCN        | 92.9854338 | 0.71967969 | 0.03467088 | 0.15271527 |
| FSIP2       | 209.835877 | 1.54725544 | 0.03465761 | 0.15271527 |
| INPP5E      | 321.782852 | -0.41129   | 0.03467122 | 0.15271527 |
| P2RX7       | 308.958053 | 0.99797321 | 0.03466953 | 0.15271527 |
| SSR4P1      | 28.5356434 | 1.12784251 | 0.03464935 | 0.15271527 |
| TPRN        | 109.244167 | -0.5069473 | 0.03463935 | 0.15271527 |
| XG          | 3.1348359  | 1.47492251 | 0.03464181 | 0.15271527 |

|           |            |            |            |            |
|-----------|------------|------------|------------|------------|
| LINC00961 | 26.7491316 | -1.2524645 | 0.0346822  | 0.15271911 |
| SGPP1     | 471.400942 | 0.66839481 | 0.03468988 | 0.15271911 |
| CATSPER3  | 10.5364286 | 1.05648542 | 0.03471843 | 0.15277634 |
| COQ3      | 41.7352018 | 0.68829536 | 0.03473848 | 0.15277634 |
| FBXO9     | 799.899467 | 0.56642611 | 0.03472916 | 0.15277634 |
| RPUSD1    | 221.016651 | -0.5605265 | 0.0347343  | 0.15277634 |
| MPHOSPH6  | 139.548452 | 0.75888126 | 0.03478672 | 0.15294928 |
| ARFGAP1   | 1600.32514 | -0.7068717 | 0.03482334 | 0.15303189 |
| SALL1     | 216.958488 | -1.483261  | 0.03482016 | 0.15303189 |
| ATP5L     | 1235.58151 | -0.4292391 | 0.03484108 | 0.15307069 |
| ATP6VOE1  | 1847.63379 | 0.58631508 | 0.03490042 | 0.15327266 |
| TUBB3     | 157.807752 | -1.4374909 | 0.03490491 | 0.15327266 |
| ATP5O     | 1363.95493 | -0.4167176 | 0.03492294 | 0.1533126  |
| C9orf169  | 6.06582511 | -1.269607  | 0.03493996 | 0.15334808 |
| GOLGA2P7  | 109.549437 | -0.7580056 | 0.03495122 | 0.15335831 |
| C18orf21  | 144.864465 | 0.54622166 | 0.03502366 | 0.1536369  |
| PWARSN    | 463.34341  | 0.48792199 | 0.03507084 | 0.15378679 |
| TIMM50    | 445.620976 | -0.459918  | 0.03507575 | 0.15378679 |
| CASS4     | 146.230168 | 1.1161217  | 0.03510821 | 0.15385051 |
| PTPN13    | 11648.2345 | 0.51152227 | 0.0351072  | 0.15385051 |
| SIRT1     | 642.212488 | 0.3490022  | 0.03515963 | 0.1540365  |
| RBM11     | 37.423797  | 1.41333357 | 0.03519209 | 0.15413937 |
| PHYHIPL   | 10.0209174 | -1.5265389 | 0.03522123 | 0.15422765 |
| HNRNPH3   | 1341.5983  | -0.4554313 | 0.03524571 | 0.15425614 |
| SRPR      | 2631.4663  | -0.3364215 | 0.03523837 | 0.15425614 |
| SAMD1     | 115.174029 | -0.4881065 | 0.03529588 | 0.15443636 |
| LAMTOR3   | 681.801425 | 0.47030608 | 0.03538711 | 0.15473645 |
| P4HA2     | 1359.70555 | 0.87400914 | 0.0353893  | 0.15473645 |
| PRKCE     | 623.528996 | -0.5526981 | 0.03539151 | 0.15473645 |
| CCDC58    | 87.9993339 | -0.5748788 | 0.03541201 | 0.15475639 |
| RMND1     | 210.21202  | 0.47702917 | 0.0354141  | 0.15475639 |
| MICU3     | 195.645758 | 0.85148687 | 0.03544841 | 0.15486688 |
| SOBP      | 776.440183 | 0.57568824 | 0.03546235 | 0.15488836 |
| NXPH3     | 593.391696 | 1.29389251 | 0.03547666 | 0.15491143 |
| FAM228A   | 19.4521436 | 1.1866272  | 0.03551294 | 0.15499099 |
| LINC00478 | 1325.64013 | -1.256096  | 0.03550652 | 0.15499099 |
| TLX1      | 20.4413679 | 1.58037128 | 0.03554479 | 0.15509059 |
| CUEDC1    | 569.134839 | -0.5741978 | 0.0355837  | 0.15522089 |
| PRAM1     | 71.1289618 | 1.19232243 | 0.03564636 | 0.15545472 |
| COL14A1   | 167.087832 | 0.96752863 | 0.03574713 | 0.15577546 |
| RNF208    | 21.5956799 | -0.854781  | 0.03573862 | 0.15577546 |
| SNAP47    | 420.901426 | -0.3048994 | 0.03573428 | 0.15577546 |
| SNORD10   | 508.552181 | 0.65516469 | 0.0357946  | 0.15590315 |
| TPTE2P3   | 1.94793797 | -1.5810236 | 0.0357932  | 0.15590315 |
| S1PR4     | 7.39846383 | 1.23867033 | 0.03582811 | 0.1560095  |
| NEURL1    | 11.4539596 | -1.3127489 | 0.03584503 | 0.15604361 |
| LINC00412 | 13.224605  | 0.98556536 | 0.03587683 | 0.15614246 |
| KLF7      | 1380.77502 | 0.52712671 | 0.03589091 | 0.15616412 |
| KIF6      | 4.76493292 | 1.32715644 | 0.03591958 | 0.15624927 |
| GTF2H2C_2 | 14.1992006 | 0.83192154 | 0.03592897 | 0.1562505  |

|            |            |            |            |            |
|------------|------------|------------|------------|------------|
| NDUFB3     | 396.835805 | -0.3766351 | 0.03594115 | 0.15626389 |
| COA4       | 358.341194 | -0.3892484 | 0.03598685 | 0.15638336 |
| MIR3907    | 2.37999851 | -1.3995485 | 0.03598397 | 0.15638336 |
| MORC4      | 587.628997 | 0.66627092 | 0.03606254 | 0.15663299 |
| SLC44A2    | 4648.60202 | 0.64191065 | 0.0360559  | 0.15663299 |
| PDCD1LG2   | 19.1991143 | 1.03476554 | 0.03615722 | 0.15697218 |
| ROR1       | 525.419175 | 1.27884318 | 0.03615893 | 0.15697218 |
| HCG11      | 522.288776 | 1.02875712 | 0.03617526 | 0.15700337 |
| LOC1019293 | 83.4092115 | 1.56203633 | 0.03619839 | 0.15706403 |
| EPS8L2     | 744.869325 | -0.9011829 | 0.03622698 | 0.15713091 |
| HAUS1      | 194.899187 | 0.68909541 | 0.03624126 | 0.15713091 |
| YIPF6      | 1299.04284 | 0.43646951 | 0.03623215 | 0.15713091 |
| IL20RA     | 63.59745   | 1.45127056 | 0.03630824 | 0.15733892 |
| MROH7      | 31.6436137 | 1.4272628  | 0.03631658 | 0.15733892 |
| ZNF799     | 111.815578 | 0.82831895 | 0.03631674 | 0.15733892 |
| KCNQ5      | 10.2351465 | -1.4690359 | 0.03636034 | 0.15746473 |
| ZNF429     | 250.823306 | 0.55013004 | 0.03636412 | 0.15746473 |
| ERP44      | 1161.62205 | -0.3155264 | 0.03640591 | 0.15760592 |
| YPEL2      | 648.689765 | 0.90099845 | 0.03643293 | 0.15768313 |
| ZNF534     | 18.9296958 | 1.41201414 | 0.03646944 | 0.15780137 |
| RIMS4      | 312.902817 | 1.32415634 | 0.0365018  | 0.15790155 |
| MOB3B      | 302.789553 | 1.231246   | 0.03654816 | 0.15806227 |
| DOCK7      | 1239.3312  | 0.65767269 | 0.03660495 | 0.158268   |
| ANKRD22    | 177.633035 | 1.44472907 | 0.03662585 | 0.15831849 |
| FAM110B    | 706.120658 | 0.66826761 | 0.0366897  | 0.15853198 |
| NDC80      | 70.3675028 | -1.245522  | 0.03669371 | 0.15853198 |
| DDX31      | 407.968414 | -0.557379  | 0.03670925 | 0.15855921 |
| LOC1002894 | 5.67994531 | 1.28272411 | 0.03672855 | 0.15860265 |
| GSC        | 3.86504639 | -1.565111  | 0.03675943 | 0.15869607 |
| CPA4       | 4665.73347 | -1.4820379 | 0.03678742 | 0.15874221 |
| GIMAP7     | 119.651303 | 0.82340872 | 0.03678861 | 0.15874221 |
| RAP1A      | 872.7472   | 0.62042737 | 0.03688171 | 0.15910392 |
| ELF4       | 665.590411 | -0.6328495 | 0.03696061 | 0.15940424 |
| LIMCH1     | 1662.6335  | 0.84807244 | 0.03701352 | 0.1595354  |
| RBBP9      | 616.067243 | 0.85239703 | 0.03700325 | 0.1595354  |
| WDR59      | 704.653043 | -0.6231121 | 0.0370189  | 0.1595354  |
| M6PR       | 1205.27439 | 0.5021104  | 0.03707155 | 0.15972216 |
| FHL5       | 46.722178  | 1.36241947 | 0.03712117 | 0.15989583 |
| CASQ2      | 37.5453976 | 1.49173275 | 0.03715783 | 0.16001357 |
| PARL       | 382.973354 | -0.3637879 | 0.03716774 | 0.16001611 |
| LOC440461  | 4.43513812 | 1.48662559 | 0.03718124 | 0.16003412 |
| TMBIM4     | 1128.42719 | 0.3923107  | 0.03722102 | 0.16016514 |
| RPRM       | 42.5060364 | -1.559614  | 0.03723463 | 0.16018357 |
| MC1R       | 148.126311 | -1.0849308 | 0.03724727 | 0.16019779 |
| C8orf88    | 338.39121  | 1.17807772 | 0.03733202 | 0.16044754 |
| PCBP1      | 2123.78036 | -0.6917871 | 0.03733338 | 0.16044754 |
| SERPINA1   | 415.639813 | 0.99961983 | 0.0373317  | 0.16044754 |
| XYLT2      | 870.440145 | -0.5775439 | 0.03734896 | 0.1604743  |
| NALCN      | 2534.81893 | 0.87001844 | 0.03735908 | 0.16047764 |
| ARMC10     | 538.041975 | 0.50726982 | 0.03746809 | 0.16082523 |

|            |            |            |            |            |
|------------|------------|------------|------------|------------|
| DYNC111    | 235.725    | -1.3318962 | 0.03745034 | 0.16082523 |
| HAP1       | 12.0404201 | -1.2892276 | 0.03748593 | 0.16082523 |
| SLC16A5    | 1002.28317 | -0.9872474 | 0.03746856 | 0.16082523 |
| SPACA6P-AS | 13.3306428 | 0.99450851 | 0.03748685 | 0.16082523 |
| PSMD10     | 436.994104 | 0.42430895 | 0.03750419 | 0.16085943 |
| CEBPG      | 565.937503 | -0.6047147 | 0.03758398 | 0.1610809  |
| G3BP2      | 2621.72827 | -0.5125171 | 0.03756603 | 0.1610809  |
| SHISA2     | 473.494903 | -1.3024522 | 0.03757543 | 0.1610809  |
| EFNA4      | 91.3781261 | -0.5014193 | 0.03761325 | 0.16115562 |
| MXD1       | 185.325466 | -0.5835473 | 0.03762963 | 0.16115562 |
| RBKS       | 45.042154  | 0.82130925 | 0.03763897 | 0.16115562 |
| VIPR1      | 82.1612199 | 1.05570649 | 0.03762583 | 0.16115562 |
| ADIRF      | 2463.17894 | 1.16600293 | 0.03765537 | 0.16118563 |
| AIM2       | 12.4243933 | 1.38288531 | 0.03769291 | 0.1612659  |
| LOC283856  | 4.27689379 | 1.4975081  | 0.03769118 | 0.1612659  |
| TMEM178A   | 41.7652347 | 0.98349204 | 0.03772266 | 0.16135297 |
| ABTB1      | 619.761557 | -1.0231316 | 0.03777898 | 0.16147317 |
| P2RY13     | 430.498032 | 1.15865962 | 0.03777677 | 0.16147317 |
| TMEM59     | 2780.3716  | 0.5833456  | 0.03777558 | 0.16147317 |
| ALPL       | 567.504478 | 1.08282598 | 0.0378257  | 0.16163259 |
| ACKR1      | 10.626267  | 1.49845636 | 0.03784651 | 0.16164106 |
| HTRA4      | 9.30924466 | 1.19731909 | 0.03784494 | 0.16164106 |
| PLVAP      | 695.311976 | 1.16971402 | 0.03786319 | 0.16166578 |
| PNMA3      | 111.82416  | 1.13006081 | 0.03787114 | 0.16166578 |
| CENPT      | 563.390545 | -0.3836354 | 0.03793296 | 0.16188943 |
| MED1       | 1858.91414 | -0.3678358 | 0.03796726 | 0.16199551 |
| ARMCX5     | 286.11859  | 0.30965357 | 0.03800795 | 0.16212885 |
| C16orf91   | 94.8814198 | -0.5607289 | 0.03806153 | 0.16231708 |
| ZNF692     | 407.822119 | -0.5225834 | 0.03807932 | 0.16235259 |
| LOC374443  | 396.955485 | 0.66003046 | 0.03809934 | 0.16239762 |
| PPM1M      | 515.227008 | 0.61092594 | 0.03812258 | 0.16245634 |
| NGF        | 28.7600657 | 1.32688528 | 0.03813515 | 0.16246957 |
| SHPK       | 465.347689 | -0.5680679 | 0.03827836 | 0.16303922 |
| PABPC1L    | 342.411489 | -0.8711774 | 0.03830938 | 0.16309456 |
| TUFM       | 1742.09385 | -0.4118919 | 0.03831036 | 0.16309456 |
| ENGASE     | 640.597545 | -0.6439339 | 0.03836623 | 0.16325143 |
| MSRB2      | 229.192016 | 0.47342667 | 0.0383662  | 0.16325143 |
| NUGGC      | 5.81850368 | 1.46394586 | 0.03838416 | 0.16328727 |
| EGR1       | 2613.89312 | 1.29224616 | 0.03842337 | 0.16341357 |
| RARRES3    | 255.306307 | 0.90035571 | 0.03847282 | 0.16358333 |
| CYP17A1    | 5.38629159 | 1.51465977 | 0.03850817 | 0.16365257 |
| HLA-DOA    | 46.6862641 | 1.14984133 | 0.03849986 | 0.16365257 |
| WDSUB1     | 201.13731  | -0.4783337 | 0.03854212 | 0.16375631 |
| KLHDC4     | 223.777652 | -0.6510814 | 0.03858921 | 0.16378931 |
| LEPR       | 24807.8775 | 1.36177844 | 0.0385976  | 0.16378931 |
| SCN4B      | 917.928194 | 1.19183289 | 0.03856154 | 0.16378931 |
| SEC63      | 1751.97974 | 0.43779711 | 0.03859047 | 0.16378931 |
| SKIV2L2    | 1350.41861 | 0.33510538 | 0.03858894 | 0.16378931 |
| TPH1       | 12.2174543 | 0.88231602 | 0.03862456 | 0.16386321 |
| CTSV       | 155.227398 | -1.4523987 | 0.03864724 | 0.16391891 |

|            |            |            |            |            |
|------------|------------|------------|------------|------------|
| METTL23    | 191.520565 | -0.5795315 | 0.0386625  | 0.16394312 |
| EPN2       | 726.562976 | -0.3713671 | 0.03872739 | 0.16417772 |
| RPSAP9     | 6.71453024 | 1.17326781 | 0.03875345 | 0.16424763 |
| LOC1001295 | 7.68049453 | 1.11461312 | 0.03876713 | 0.16426505 |
| CNNM3      | 445.146027 | -0.4824065 | 0.03881024 | 0.16436657 |
| DLX6       | 13.7351087 | -1.5539613 | 0.03880929 | 0.16436657 |
| CENPH      | 76.9021963 | -0.9067781 | 0.03883774 | 0.16444249 |
| ZFP41      | 428.351766 | -0.5665555 | 0.03885287 | 0.16446596 |
| PRRT3      | 103.947037 | -0.9560866 | 0.03886985 | 0.1644973  |
| FGR        | 166.184988 | 0.96409554 | 0.03897303 | 0.16489328 |
| ANKRD35    | 32.4641397 | 1.31589488 | 0.0390109  | 0.16501283 |
| POLR2J     | 322.339786 | -0.4615039 | 0.03902362 | 0.16502597 |
| MFSD3      | 128.641652 | -0.6780844 | 0.03904327 | 0.16506842 |
| KDM5B      | 1716.79965 | -0.4103611 | 0.03913557 | 0.1654179  |
| KDM2A      | 2669.94715 | -0.2780708 | 0.03917565 | 0.16554652 |
| BNIP3L     | 3691.17528 | 0.58378457 | 0.03919575 | 0.1655907  |
| MAP4K2     | 423.188213 | -0.4496874 | 0.03923277 | 0.16566555 |
| RAB8B      | 1795.33869 | 0.72779465 | 0.03922369 | 0.16566555 |
| GPATCH8    | 2483.12801 | -0.4277951 | 0.03924481 | 0.16567563 |
| CARF       | 543.39684  | 0.49975754 | 0.03928362 | 0.16570043 |
| DNAJC9     | 342.18941  | -0.4418019 | 0.03929895 | 0.16570043 |
| RIOK1      | 436.795803 | 0.55607997 | 0.0392978  | 0.16570043 |
| SORCS2     | 1332.12695 | -1.3693937 | 0.03929221 | 0.16570043 |
| SRRM5      | 10.2606234 | -1.0561187 | 0.03926701 | 0.16570043 |
| AES        | 5276.26631 | 0.51881109 | 0.0393552  | 0.16586929 |
| CD163L1    | 85.9318021 | -0.9150233 | 0.03935832 | 0.16586929 |
| ZNF277     | 361.622878 | 0.45581914 | 0.03937829 | 0.1659127  |
| SNTB2      | 2100.79693 | 0.70045831 | 0.03951871 | 0.16646348 |
| DNA2       | 107.030363 | -0.6876712 | 0.03953959 | 0.16651056 |
| BARD1      | 280.954893 | -0.7016319 | 0.03954958 | 0.1665118  |
| SAE1       | 964.988413 | -0.4108527 | 0.0395695  | 0.16655481 |
| SIX1       | 2645.73737 | 0.77986526 | 0.03964145 | 0.16681676 |
| RPS9       | 4708.7241  | 0.49496342 | 0.03967321 | 0.16690945 |
| GABBR1     | 7.53120248 | 1.54445098 | 0.0397079  | 0.1670145  |
| ITGA6      | 2194.24368 | -0.6852634 | 0.03974781 | 0.16714139 |
| MBNL1-AS1  | 74.6330146 | 0.68160804 | 0.03977815 | 0.16722802 |
| IPW        | 444.251067 | 0.63718833 | 0.03979544 | 0.16725971 |
| RPN2       | 5098.3232  | -0.5246556 | 0.03984811 | 0.16739912 |
| ZNF557     | 521.969977 | 0.49888944 | 0.03984072 | 0.16739912 |
| EFCAB1     | 19.033604  | 1.41966361 | 0.03987894 | 0.16747346 |
| MYOM1      | 61.812216  | 0.95535311 | 0.0398922  | 0.16747346 |
| NR4A1      | 2110.15436 | 1.35544971 | 0.03989984 | 0.16747346 |
| PI4KB      | 1645.63428 | -0.3058753 | 0.03990483 | 0.16747346 |
| PFKFB3     | 1505.75213 | 0.7633741  | 0.0399179  | 0.16748734 |
| FBXL3      | 1704.41715 | 0.49830752 | 0.03993963 | 0.16749665 |
| KCTD5      | 330.503198 | -0.4914347 | 0.03993762 | 0.16749665 |
| COMMD3     | 183.159754 | 0.44158239 | 0.03996153 | 0.16750368 |
| PRG1       | 4.29696062 | 1.54941336 | 0.03995922 | 0.16750368 |
| SCAMP1     | 1286.83292 | 0.52699844 | 0.03997058 | 0.16750368 |
| LOXL3      | 293.54708  | 1.16771032 | 0.04001099 | 0.16759117 |

|            |            |            |            |            |
|------------|------------|------------|------------|------------|
| RBM28      | 501.333455 | -0.3821497 | 0.04000884 | 0.16759117 |
| GALNT18    | 299.236283 | -0.8355348 | 0.0400352  | 0.16765166 |
| LYRM7      | 554.508142 | 0.65433938 | 0.04009731 | 0.16787081 |
| LINC00887  | 132.778752 | -1.4595004 | 0.04014601 | 0.16791088 |
| NSG1       | 261.037855 | -1.3904511 | 0.04013419 | 0.16791088 |
| PYROXD1    | 362.684506 | 0.78547136 | 0.04013891 | 0.16791088 |
| TMEM68     | 238.818587 | 0.44606061 | 0.04013375 | 0.16791088 |
| KCTD2      | 917.841807 | -0.4320312 | 0.04017761 | 0.16800212 |
| CAMK2B     | 22.4851656 | 1.30233172 | 0.04022042 | 0.16814014 |
| EMILIN1    | 1272.14646 | 1.04882344 | 0.04023195 | 0.16814741 |
| PTEN       | 3042.38628 | 0.35554351 | 0.04024911 | 0.1681782  |
| MAP2K6     | 102.044251 | -1.0386826 | 0.04026077 | 0.16818597 |
| ZNF551     | 417.911509 | -0.4004567 | 0.04036038 | 0.16856104 |
| CAPN10     | 264.288625 | -0.5073286 | 0.04037052 | 0.1685624  |
| ANAPC4     | 506.573495 | 0.28527509 | 0.04039244 | 0.1686129  |
| NEGR1      | 11.6924607 | 1.49195337 | 0.0404335  | 0.16874325 |
| C20orf197  | 23.6448047 | 1.20755414 | 0.04049262 | 0.16881865 |
| CACNA2D2   | 395.028132 | 1.20283169 | 0.04051057 | 0.16881865 |
| KIAA1462   | 6078.12074 | 0.84395393 | 0.04048408 | 0.16881865 |
| LRR8C      | 1658.71835 | 0.76198808 | 0.04046376 | 0.16881865 |
| MPHOSPH9   | 678.328814 | -0.3573624 | 0.04048032 | 0.16881865 |
| SERPIND1   | 333.087784 | 1.42210229 | 0.04050727 | 0.16881865 |
| IPP        | 267.699529 | 0.64735296 | 0.04054275 | 0.1689117  |
| RAD54L2    | 573.301682 | 0.34713934 | 0.0405552  | 0.16892258 |
| COPB1      | 2502.22725 | 0.34932343 | 0.04062026 | 0.16899276 |
| HEATR6     | 1008.00742 | -0.4196981 | 0.04059632 | 0.16899276 |
| LIN9       | 87.1558606 | -0.6580482 | 0.04062127 | 0.16899276 |
| SCGN       | 2.85797627 | 1.52628067 | 0.04061125 | 0.16899276 |
| ZNF75D     | 513.586793 | 0.39135419 | 0.04061375 | 0.16899276 |
| AKAP11     | 4954.8661  | 0.47401766 | 0.04064762 | 0.16906138 |
| FAM65A     | 954.952129 | -0.4731353 | 0.04068938 | 0.16918762 |
| STPG1      | 99.024897  | 0.78867151 | 0.04069768 | 0.16918762 |
| APP        | 25906.9923 | -0.9022798 | 0.0407629  | 0.16941771 |
| DOC2A      | 32.7498229 | -1.0611799 | 0.04078973 | 0.16944717 |
| OPA3       | 866.001683 | -0.4520011 | 0.04078847 | 0.16944717 |
| ERBB2IP    | 4069.9461  | 0.33753074 | 0.04083697 | 0.16960238 |
| AFAP1-AS1  | 590.381018 | -1.518759  | 0.04086664 | 0.16964063 |
| CPSF7      | 1586.47466 | -0.2986291 | 0.04087583 | 0.16964063 |
| TMUB1      | 343.008927 | -0.6109222 | 0.04086823 | 0.16964063 |
| LINC01114  | 12.2523568 | 1.53049503 | 0.04088578 | 0.16964091 |
| RAPGEF1    | 1912.05948 | 0.39191394 | 0.04095115 | 0.16987106 |
| UNC5A      | 3.02626144 | -1.3723207 | 0.04096337 | 0.1698807  |
| RPS4X      | 12337.7808 | 0.63855466 | 0.04099036 | 0.16995158 |
| KIAA0247   | 4312.53002 | 0.7416564  | 0.04101202 | 0.17000033 |
| MMP10      | 2.2712243  | -1.53514   | 0.04103951 | 0.17007319 |
| APH1B      | 710.955273 | 0.75796484 | 0.04105047 | 0.17007757 |
| LIME1      | 123.393493 | -0.6392351 | 0.04111534 | 0.17026455 |
| LOC1019295 | 5.12140002 | 1.3366799  | 0.04111544 | 0.17026455 |
| ZNF558     | 348.021042 | 0.46822119 | 0.04113651 | 0.1703107  |
| SLC35F6    | 1147.50176 | -0.4563458 | 0.04114921 | 0.17032219 |

|            |            |            |            |            |
|------------|------------|------------|------------|------------|
| LY86       | 127.65483  | 0.96982751 | 0.04117382 | 0.17038298 |
| LILRA1     | 75.6352283 | 1.12695363 | 0.04118547 | 0.17039013 |
| NR1D1      | 222.263978 | -1.1494683 | 0.04123969 | 0.17057333 |
| RNPS1      | 1274.21858 | -0.3840592 | 0.04129076 | 0.17070227 |
| SELPLG     | 489.514112 | 1.02815924 | 0.04128577 | 0.17070227 |
| UBOX5      | 333.535126 | 0.46688297 | 0.04131282 | 0.17075237 |
| EPHB3      | 155.967735 | 1.18182884 | 0.04136078 | 0.1708683  |
| ZNF114     | 55.5185539 | -1.1416571 | 0.04135297 | 0.1708683  |
| KCG1       | 5.98132477 | -1.538171  | 0.04142219 | 0.17099854 |
| LOC1005075 | 25.418436  | -0.7274538 | 0.04141997 | 0.17099854 |
| SLC22A11   | 1.955803   | 1.52327374 | 0.04140353 | 0.17099854 |
| ZNF573     | 228.119316 | 0.53302389 | 0.04143494 | 0.17101005 |
| OTUB1      | 665.515843 | -0.4158878 | 0.04149457 | 0.17121496 |
| UBE2B      | 744.991136 | 0.7774133  | 0.04151156 | 0.1712439  |
| BIRC6      | 7667.55871 | -0.3166979 | 0.04157367 | 0.17145892 |
| EXPH5      | 187.0097   | -1.1447648 | 0.04159831 | 0.17151935 |
| CADM1      | 723.782529 | 0.69016318 | 0.04162388 | 0.17154237 |
| RRP15      | 495.911358 | -0.3199627 | 0.04161573 | 0.17154237 |
| HLA-DRB5   | 920.637497 | 1.49729815 | 0.04163601 | 0.17155115 |
| APPL1      | 1760.21167 | 0.52247831 | 0.04165861 | 0.17160306 |
| ZNF623     | 612.16227  | -0.4267892 | 0.04167755 | 0.17163992 |
| ENPP6      | 10946.3657 | 1.23415306 | 0.041769   | 0.17197529 |
| EAF2       | 65.4473724 | 0.76295567 | 0.04184156 | 0.17219139 |
| FAM83H     | 546.143964 | -1.2634266 | 0.04183339 | 0.17219139 |
| LOC1025462 | 28.7990236 | 1.15285796 | 0.04187451 | 0.17228571 |
| FOXP1      | 5993.78581 | 0.54165724 | 0.04190279 | 0.17236073 |
| ACAT1      | 765.589409 | -0.5586381 | 0.041962   | 0.17238557 |
| GPC2       | 32.2743508 | -0.896616  | 0.04194728 | 0.17238557 |
| KBTBD4     | 305.4465   | 0.54142861 | 0.04196803 | 0.17238557 |
| PALD1      | 1306.86787 | 0.87091083 | 0.04196908 | 0.17238557 |
| RHOBTB1    | 834.748312 | 0.97811316 | 0.04195039 | 0.17238557 |
| TMA16      | 221.685245 | -0.4277766 | 0.0419636  | 0.17238557 |
| LOC1001283 | 62.2680769 | -0.8676218 | 0.04198673 | 0.17241678 |
| RNPEPL1    | 643.962762 | -0.5585723 | 0.04200314 | 0.17244293 |
| TRIM68     | 276.011518 | 0.66074968 | 0.04202465 | 0.17248999 |
| GSTA4      | 404.545198 | 0.65806924 | 0.04203656 | 0.17249762 |
| PDCD4-AS1  | 44.6128679 | -0.9800492 | 0.04205156 | 0.17251792 |
| THUMP3-A   | 278.207697 | -0.5648122 | 0.04206918 | 0.17254898 |
| LOC1005066 | 34.532796  | 0.9093181  | 0.04209779 | 0.17256544 |
| NAA30      | 501.424422 | 0.42344263 | 0.04210335 | 0.17256544 |
| NPFF       | 31.9434915 | 0.84439591 | 0.04208929 | 0.17256544 |
| BCKDHA     | 514.090957 | -0.5157055 | 0.0421429  | 0.17263775 |
| CSNK2A2    | 439.549014 | -0.4658864 | 0.04214457 | 0.17263775 |
| FASTK      | 701.786603 | -0.4194599 | 0.04215117 | 0.17263775 |
| AARD       | 12.7613555 | -1.4264821 | 0.04219451 | 0.17277402 |
| CREG1      | 1597.29348 | 0.38086866 | 0.04224291 | 0.17293096 |
| MDC1       | 5.60883635 | 1.5247718  | 0.04228374 | 0.17305683 |
| KCTD3      | 1177.64365 | -0.3562583 | 0.04231517 | 0.1731442  |
| PRMT2      | 2667.39086 | 0.4754315  | 0.04232571 | 0.17314604 |
| HMCN1      | 1057.6856  | 1.41032288 | 0.04240667 | 0.17327075 |

|            |            |            |            |            |
|------------|------------|------------|------------|------------|
| PIK3C2B    | 3060.74544 | -0.7830566 | 0.04238279 | 0.17327075 |
| PPM1L      | 107.649262 | 0.82459264 | 0.04238662 | 0.17327075 |
| SMAP2      | 1232.70844 | 0.88270967 | 0.04239497 | 0.17327075 |
| WDR19      | 735.063706 | 0.67732205 | 0.04240509 | 0.17327075 |
| HMHA1      | 808.029036 | 0.9215165  | 0.04245427 | 0.17342397 |
| ANPEP      | 1062.57855 | -0.8637699 | 0.04247787 | 0.17344894 |
| MPP7       | 76.0425742 | 0.9998992  | 0.04248059 | 0.17344894 |
| YIPF2      | 540.629973 | 0.36435344 | 0.04251378 | 0.17354319 |
| CCNG1      | 4310.29495 | 0.55517678 | 0.04257101 | 0.17369419 |
| LOC1019272 | 9.98329843 | 1.18347465 | 0.04256382 | 0.17369419 |
| EIF1AD     | 336.316946 | -0.3905252 | 0.0426028  | 0.1737413  |
| STARD8     | 579.873647 | 0.82700567 | 0.04259894 | 0.1737413  |
| KIAA1033   | 2303.6069  | 0.37096474 | 0.04263297 | 0.17378176 |
| SOX6       | 66.8760069 | -1.2392871 | 0.04262829 | 0.17378176 |
| TMEM110    | 1280.18314 | 0.94222523 | 0.04269754 | 0.17400362 |
| AGXT       | 5.33087884 | -1.5290749 | 0.04272918 | 0.17405961 |
| KBTBD11    | 579.10082  | -0.9690425 | 0.0427417  | 0.17405961 |
| MCUR1      | 300.274599 | -0.5157947 | 0.04273669 | 0.17405961 |
| LRIT3      | 13.2064488 | 1.06365194 | 0.04277886 | 0.174134   |
| SAP130     | 537.8456   | -0.4616971 | 0.04278025 | 0.174134   |
| LTV1       | 328.511772 | 0.44648272 | 0.0428252  | 0.17427564 |
| FAM195A    | 128.313032 | -0.7511763 | 0.04287002 | 0.17439715 |
| PPP1R37    | 389.043674 | -0.3738727 | 0.04287539 | 0.17439715 |
| ATP2A1     | 26.3764114 | -0.8808947 | 0.04295285 | 0.17456023 |
| CDKN2A     | 41.3267864 | -1.4411512 | 0.04295616 | 0.17456023 |
| ROMO1      | 341.92189  | 0.50408556 | 0.04292604 | 0.17456023 |
| STAT2      | 4214.37454 | 0.51381139 | 0.04294744 | 0.17456023 |
| LRRN2      | 184.161091 | -1.4136204 | 0.04296894 | 0.17457084 |
| CD7        | 12.6382089 | 1.12965998 | 0.04301897 | 0.17473276 |
| CCDC102A   | 266.13445  | -0.689926  | 0.04304889 | 0.17481293 |
| GPR126     | 413.050086 | 1.0312631  | 0.04307384 | 0.17487288 |
| RND2       | 63.5727814 | 1.16027893 | 0.04310966 | 0.1749769  |
| BBS4       | 525.368856 | -0.3928448 | 0.04315122 | 0.17510414 |
| C2orf48    | 2.28443318 | -1.4210973 | 0.04316658 | 0.17510414 |
| KLHDC2     | 810.645567 | 0.61460318 | 0.04318074 | 0.17510414 |
| YTHDC2     | 1378.94146 | 0.66730129 | 0.04318181 | 0.17510414 |
| TOPORS     | 739.94946  | 0.45414064 | 0.04325326 | 0.17535242 |
| ATXN3      | 730.371528 | 0.43337213 | 0.04327382 | 0.17539436 |
| FIGNL2     | 13.1999833 | 1.33640715 | 0.04330697 | 0.17540446 |
| PDP1       | 1229.68121 | 0.5562724  | 0.04329659 | 0.17540446 |
| RNASE1     | 1953.60753 | -1.2056814 | 0.04330243 | 0.17540446 |
| ENDOD1     | 2492.40223 | -0.5264429 | 0.04342907 | 0.17579458 |
| GZMA       | 20.628336  | 1.27192603 | 0.04343401 | 0.17579458 |
| PARK7      | 1048.0417  | 0.32044021 | 0.04342794 | 0.17579458 |
| LOC1001909 | 29.9906551 | -0.646073  | 0.04346136 | 0.17583639 |
| NAA16      | 592.820596 | 0.54267004 | 0.04346483 | 0.17583639 |
| STXBPL     | 2.46052767 | -1.4844181 | 0.04348013 | 0.17585684 |
| PTAFR      | 320.500061 | 0.91036399 | 0.04351372 | 0.17595125 |
| GUCY1A2    | 152.787075 | 1.14904079 | 0.04355365 | 0.17607123 |
| SEC16B     | 154.573806 | 0.80498611 | 0.04362288 | 0.17630958 |

|            |            |            |            |            |
|------------|------------|------------|------------|------------|
| GALNT11    | 1227.96572 | 0.54473862 | 0.04366103 | 0.17638487 |
| NCKAP5L    | 1114.42887 | -0.5044742 | 0.04366206 | 0.17638487 |
| CCDC24     | 54.6123503 | 0.71952527 | 0.04367953 | 0.17640544 |
| SCAF11     | 3960.79203 | 0.42374421 | 0.04368771 | 0.17640544 |
| C12orf60   | 9.85311761 | 0.88022966 | 0.0437688  | 0.17645354 |
| CHST2      | 307.091    | -1.085275  | 0.04377158 | 0.17645354 |
| DAPK2      | 129.117883 | 1.18284359 | 0.04375897 | 0.17645354 |
| DOK5       | 209.706011 | 1.32497402 | 0.04373382 | 0.17645354 |
| TFB1M      | 115.634474 | 0.42199472 | 0.04372239 | 0.17645354 |
| TNXB       | 11.2837391 | -1.2202685 | 0.04374592 | 0.17645354 |
| UQCRC1     | 1339.97628 | -0.5643637 | 0.04373753 | 0.17645354 |
| RLF        | 736.533822 | 0.61546119 | 0.04381446 | 0.17658494 |
| ASH1L-AS1  | 64.5609255 | -0.6660855 | 0.04384184 | 0.1766221  |
| CENPL      | 112.087397 | -0.6392787 | 0.04385586 | 0.1766221  |
| GARS       | 1080.10636 | -0.5305102 | 0.04384467 | 0.1766221  |
| KDM3A      | 1109.5824  | -0.6070527 | 0.04387716 | 0.1766221  |
| SLC22A5    | 560.283808 | 0.8485466  | 0.04388542 | 0.1766221  |
| SPIN1      | 3111.01308 | -0.2832177 | 0.04387265 | 0.1766221  |
| KMT2B      | 1363.70388 | -0.4388735 | 0.04391298 | 0.17663985 |
| POLM       | 337.92371  | 0.4871434  | 0.04392318 | 0.17663985 |
| RANGAP1    | 647.098572 | -0.5768373 | 0.043931   | 0.17663985 |
| TIGD1      | 217.935263 | -0.5770797 | 0.04392319 | 0.17663985 |
| RAB7A      | 2961.5909  | -0.4870824 | 0.04394295 | 0.17664656 |
| FECH       | 519.411749 | 0.48438921 | 0.04398104 | 0.17671688 |
| IDH2       | 348.728304 | -0.6147639 | 0.04397111 | 0.17671688 |
| SNX18      | 1512.89005 | 0.3839576  | 0.04406088 | 0.17699624 |
| CD6        | 22.4349473 | 1.11105189 | 0.04410269 | 0.17712274 |
| SNTA1      | 660.029565 | 0.67094788 | 0.04422517 | 0.17753157 |
| ZSCAN16-AS | 100.340074 | 0.71726732 | 0.044216   | 0.17753157 |
| ATAD1      | 1251.65299 | -0.4499272 | 0.04444015 | 0.17822783 |
| FAM208A    | 2721.96725 | 0.38358126 | 0.04442042 | 0.17822783 |
| SLC38A4    | 48.2293512 | 1.4382721  | 0.04443263 | 0.17822783 |
| ZNF230     | 135.138499 | 0.63582994 | 0.04443254 | 0.17822783 |
| AASDHPPT   | 758.215053 | -0.2822748 | 0.04447564 | 0.17826368 |
| FBN1       | 12879.3895 | -0.7804791 | 0.04449063 | 0.17826368 |
| GLI3       | 733.212528 | 0.90014248 | 0.04448829 | 0.17826368 |
| ZHX2       | 698.12487  | -0.5401193 | 0.04446969 | 0.17826368 |
| MTERFD2    | 536.356555 | -0.4238523 | 0.04452246 | 0.1783496  |
| CSTA       | 42.8692518 | -1.2669615 | 0.04453935 | 0.17837562 |
| CETN4P     | 2.80180518 | 1.48365897 | 0.0445815  | 0.1785028  |
| CAD        | 1548.03767 | -0.5499761 | 0.04459384 | 0.17851055 |
| MID2       | 674.405016 | 0.73934216 | 0.04461247 | 0.17854351 |
| CD226      | 27.8047755 | 0.85575542 | 0.04466524 | 0.17862974 |
| LINC00899  | 30.4571817 | 0.7557026  | 0.04465702 | 0.17862974 |
| OPLAH      | 431.827803 | -1.1089785 | 0.04466179 | 0.17862974 |
| RTN2       | 87.6909492 | -0.8114061 | 0.04468044 | 0.17864891 |
| ACE        | 196.662473 | 1.00098375 | 0.04470154 | 0.17865833 |
| F13A1      | 1931.41061 | -0.9440558 | 0.04470361 | 0.17865833 |
| N4BP2      | 1092.28885 | -0.4745013 | 0.04476584 | 0.17879969 |
| OXCT1      | 995.009991 | 0.70826371 | 0.04477023 | 0.17879969 |

|            |            |            |            |            |
|------------|------------|------------|------------|------------|
| VPS9D1     | 320.963545 | -0.6020199 | 0.04476992 | 0.17879969 |
| CASP8      | 413.629765 | -0.5398356 | 0.04481611 | 0.17889966 |
| FAM173A    | 88.9396509 | -0.4742336 | 0.04481585 | 0.17889966 |
| SNORA63    | 1398.52223 | -0.6309827 | 0.04485342 | 0.17900697 |
| CNTRL      | 907.537561 | 0.7893359  | 0.04487628 | 0.17905657 |
| CIITA      | 820.819158 | 1.01271375 | 0.04500571 | 0.17940619 |
| OR7D2      | 11.6492796 | 1.45584614 | 0.0449958  | 0.17940619 |
| PCDH19     | 638.412316 | -1.3890396 | 0.04499792 | 0.17940619 |
| ZBTB38     | 2196.59695 | 0.42579654 | 0.04500259 | 0.17940619 |
| PTGS1      | 366.477538 | 0.84694074 | 0.0450887  | 0.17969529 |
| LOC1001334 | 8.28256578 | 1.21850782 | 0.04517204 | 0.17995097 |
| SCN11A     | 22.4614504 | 1.17212271 | 0.04517383 | 0.17995097 |
| ADCY2      | 1368.01986 | 1.01675372 | 0.04521489 | 0.18004626 |
| ZNF418     | 378.983107 | 0.42214035 | 0.04521872 | 0.18004626 |
| CHPF       | 3090.50259 | -1.0410436 | 0.04529076 | 0.18020766 |
| SLC25A12   | 781.038842 | -0.5427474 | 0.04527003 | 0.18020766 |
| ZNF496     | 411.578057 | -0.5520774 | 0.04528705 | 0.18020766 |
| ANGPTL5    | 54.7136993 | 1.50727084 | 0.04533624 | 0.18030503 |
| TMX2       | 1005.52654 | -0.4271737 | 0.04532959 | 0.18030503 |
| MRPL13     | 193.512373 | -0.3986293 | 0.04535401 | 0.18033393 |
| CD96       | 32.1195667 | 0.99402129 | 0.04541472 | 0.18053349 |
| SAP18      | 1601.7633  | 0.57879654 | 0.04544256 | 0.18060235 |
| ATXN7      | 939.445923 | 0.45948079 | 0.04548256 | 0.18066341 |
| C19orf57   | 15.2044265 | -1.0160437 | 0.04550726 | 0.18066341 |
| GOLGB1     | 7406.01579 | 0.18487261 | 0.04551055 | 0.18066341 |
| PANK2      | 496.373721 | 0.39237754 | 0.04549176 | 0.18066341 |
| TSFM       | 297.787427 | -0.231584  | 0.04550464 | 0.18066341 |
| DDX25      | 36.3302253 | -1.2481667 | 0.04553629 | 0.18068201 |
| LOC1005067 | 15.1085995 | -1.106649  | 0.04553537 | 0.18068201 |
| HK1        | 1553.64705 | -0.7424404 | 0.04556201 | 0.18074231 |
| RGPD1      | 4.90611412 | -1.4906522 | 0.04559123 | 0.18081643 |
| LINC00304  | 4.38955483 | -1.3647801 | 0.04561667 | 0.18087552 |
| DIRC3      | 119.22569  | 0.98795573 | 0.0456435  | 0.18091859 |
| NEK6       | 940.837541 | -0.6727382 | 0.04564861 | 0.18091859 |
| B3GNT1     | 836.991407 | 0.50543598 | 0.04568409 | 0.18101741 |
| CSNK1D     | 2207.14805 | -0.6770555 | 0.04572398 | 0.18109185 |
| RBP1       | 1019.23264 | -1.3163937 | 0.04572042 | 0.18109185 |
| FAM95C     | 7.98956277 | -1.48087   | 0.04576538 | 0.18121401 |
| MAP7D3     | 389.149742 | 1.0632898  | 0.04578277 | 0.18124108 |
| RAB6A      | 2626.78302 | -0.2975405 | 0.04580089 | 0.18127097 |
| CACNA1A    | 57.0054151 | -1.2095762 | 0.04584523 | 0.18132106 |
| TMEM216    | 125.896322 | -0.4618234 | 0.04582825 | 0.18132106 |
| ZDHHC2     | 425.899773 | 0.59302105 | 0.04583478 | 0.18132106 |
| CDH10      | 34.9389669 | -1.3714773 | 0.0458776  | 0.18140362 |
| FKBP8      | 2428.66031 | 0.31099354 | 0.04588724 | 0.18140362 |
| PINK1-AS   | 186.253016 | 0.54697937 | 0.04589849 | 0.1814063  |
| BRCA1      | 244.424204 | -0.7524546 | 0.04600421 | 0.18175823 |
| OSGEP      | 290.343451 | 0.47825    | 0.04600871 | 0.18175823 |
| HAUS7      | 399.267545 | 0.71240156 | 0.04601956 | 0.18175924 |
| MATN3      | 304.914825 | -1.3350708 | 0.04605954 | 0.18183348 |

|            |            |            |            |            |
|------------|------------|------------|------------|------------|
| PRSS12     | 38.0720705 | -1.4120865 | 0.04605605 | 0.18183348 |
| FAM182B    | 7.75917229 | 1.25526317 | 0.04613005 | 0.18203377 |
| REC8       | 150.679269 | 0.96795191 | 0.04614117 | 0.18203377 |
| UNC5CL     | 24.2877313 | 0.84202854 | 0.04614209 | 0.18203377 |
| SKP1       | 3938.92779 | 0.69650353 | 0.04619814 | 0.18221304 |
| KDM4A      | 1020.63291 | 0.46861426 | 0.04626884 | 0.18241138 |
| RNH1       | 1864.58299 | 0.5427323  | 0.04626969 | 0.18241138 |
| ANO3       | 29.1479099 | 1.43821299 | 0.04632377 | 0.18241513 |
| PTGIR      | 9.82565696 | 1.22300393 | 0.04632083 | 0.18241513 |
| RPL17      | 1494.71379 | 0.56579625 | 0.04628286 | 0.18241513 |
| ZKSCAN3    | 228.122212 | 0.65066777 | 0.04629217 | 0.18241513 |
| ZNF76      | 463.447919 | 0.60124917 | 0.04631054 | 0.18241513 |
| LOC1005062 | 19.2735949 | 1.12175354 | 0.04634778 | 0.1824678  |
| C1orf112   | 150.261313 | -0.4772337 | 0.04639296 | 0.18249732 |
| CCRL2      | 20.4032135 | 0.98950657 | 0.04638401 | 0.18249732 |
| DDN        | 4.83223474 | -1.3518866 | 0.0463978  | 0.18249732 |
| DSTN       | 3365.0772  | 0.67692233 | 0.04639676 | 0.18249732 |
| ADAMTS17   | 701.281483 | -1.0817774 | 0.04641297 | 0.18251516 |
| LINC01018  | 323.190905 | 1.15482715 | 0.04646292 | 0.18266974 |
| LOC220729  | 459.10466  | -0.4415841 | 0.04650309 | 0.18274395 |
| MIOS       | 461.397041 | 0.38628866 | 0.04649439 | 0.18274395 |
| MYO3A      | 117.387108 | -1.4478184 | 0.04653724 | 0.18282487 |
| PCSK5      | 648.401682 | -1.051992  | 0.04654498 | 0.18282487 |
| NUDCD1     | 269.343471 | -0.4030068 | 0.04656355 | 0.18285593 |
| CEP131     | 204.950222 | -0.5939486 | 0.04657946 | 0.18287657 |
| C1orf53    | 8.18111669 | -1.3036232 | 0.04667544 | 0.18307434 |
| DCBLD2     | 1327.73823 | -0.7165876 | 0.04666479 | 0.18307434 |
| LIMD1-AS1  | 9.12434147 | 1.28145084 | 0.04664506 | 0.18307434 |
| NFIX       | 2503.99486 | 0.92628742 | 0.04668316 | 0.18307434 |
| NPAP1      | 6.25157672 | 1.49780807 | 0.04666714 | 0.18307434 |
| MAT2B      | 908.051937 | 0.56435022 | 0.04670431 | 0.18311546 |
| NEFH       | 36.9559593 | 1.39506342 | 0.04674019 | 0.18321369 |
| TMEM179B   | 450.407776 | -0.4170192 | 0.04675071 | 0.18321369 |
| FRS2       | 1523.09774 | 0.29216842 | 0.04677929 | 0.18326589 |
| TAPT1      | 432.319408 | 0.33819303 | 0.04678539 | 0.18326589 |
| MARK1      | 521.20461  | -0.8474311 | 0.04680281 | 0.18329232 |
| AMICA1     | 137.412824 | 0.98785856 | 0.0468412  | 0.18335898 |
| GPBP1L1    | 1359.99014 | 0.47211191 | 0.04683672 | 0.18335898 |
| FREM1      | 1669.00369 | -0.8399928 | 0.04687494 | 0.18340743 |
| NLGN4X     | 56.4084435 | -1.4649264 | 0.04687462 | 0.18340743 |
| CD300LG    | 12.5140252 | 1.41992296 | 0.04690723 | 0.18340835 |
| STK11      | 828.17159  | 0.56270659 | 0.04689485 | 0.18340835 |
| TACR2      | 2.86128814 | 1.44336314 | 0.04690212 | 0.18340835 |
| LOC1019269 | 4.16136354 | 1.29356275 | 0.04695673 | 0.18354851 |
| SLC24A4    | 32.8253851 | 1.20411219 | 0.04696447 | 0.18354851 |
| DDX56      | 757.493519 | 0.46803483 | 0.0469874  | 0.18359636 |
| CACNA1F    | 12.2673716 | -1.1950785 | 0.04701883 | 0.18362987 |
| ELOVL4     | 67.1141601 | 1.15233673 | 0.04703686 | 0.18362987 |
| MRPL9      | 348.991868 | -0.369121  | 0.04703889 | 0.18362987 |
| PPP1R36    | 10.8147805 | 1.21535211 | 0.04703122 | 0.18362987 |

|             |            |            |            |            |
|-------------|------------|------------|------------|------------|
| ZNF24       | 1897.79754 | 0.46320387 | 0.04704947 | 0.18362987 |
| LINC00173   | 35.6218727 | -1.1672232 | 0.04713189 | 0.18386794 |
| SEPHS2      | 496.158848 | -0.7194523 | 0.04712148 | 0.18386794 |
| GAS5-AS1    | 15.4741918 | -0.674577  | 0.04717129 | 0.18397981 |
| HAUS2       | 447.655134 | 0.43566839 | 0.04718704 | 0.18399945 |
| MID1IP1-AS1 | 4.12528723 | -1.298808  | 0.04723037 | 0.18408222 |
| NDUFV1      | 1449.50136 | -0.3757577 | 0.04724044 | 0.18408222 |
| STAT4       | 20.6214955 | 1.05275484 | 0.04722905 | 0.18408222 |
| MRO         | 340.626717 | -1.115901  | 0.04725669 | 0.18410376 |
| LOC1019272  | 4.20326142 | 1.49313876 | 0.04732746 | 0.18433761 |
| SIRT7       | 138.730609 | -0.6035766 | 0.04734116 | 0.18434914 |
| TTC26       | 180.355434 | 0.62731576 | 0.04736465 | 0.18439877 |
| MOAP1       | 461.837313 | 0.55881077 | 0.0473763  | 0.18440231 |
| PDZD7       | 50.0164085 | 0.90474718 | 0.04741326 | 0.18450434 |
| PDGFB       | 426.123167 | 0.72601414 | 0.04742625 | 0.18451304 |
| ELN         | 3907.216   | 1.35083898 | 0.04748045 | 0.18468206 |
| ZNF492      | 15.0434003 | 1.02864442 | 0.04756414 | 0.18496566 |
| MEIS1       | 25.4646188 | -1.2108833 | 0.04760039 | 0.18498091 |
| TMCC1-AS1   | 77.6975453 | -1.0339453 | 0.04759543 | 0.18498091 |
| ZNF280B     | 58.0035755 | -1.1342711 | 0.04759073 | 0.18498091 |
| LOC1019271  | 3.61998486 | 1.31699388 | 0.04762435 | 0.18503215 |
| EEPD1       | 415.251271 | -1.0327365 | 0.04766248 | 0.18509648 |
| SOS1        | 1968.66417 | -0.2573852 | 0.04765275 | 0.18509648 |
| LOC1009964  | 15.3718993 | 1.31742184 | 0.04768266 | 0.18513296 |
| DMBX1       | 11.4493873 | -1.4761965 | 0.04772247 | 0.18520375 |
| ZNF663P     | 21.3658478 | 1.0783639  | 0.04771477 | 0.18520375 |
| FGF7        | 455.323648 | 1.43744093 | 0.04773348 | 0.1852046  |
| IRF7        | 138.668738 | 0.56277722 | 0.04778902 | 0.18529445 |
| PRELID2     | 109.934402 | 0.85921887 | 0.04777724 | 0.18529445 |
| STK17B      | 730.470562 | 0.84962988 | 0.04778725 | 0.18529445 |
| CLIC5       | 1224.09727 | 1.39836969 | 0.04781313 | 0.18534606 |
| CCDC124     | 352.233065 | -0.6759398 | 0.04786768 | 0.18551562 |
| KCNMB4      | 51.95995   | 1.07811757 | 0.04794322 | 0.18576645 |
| PERM1       | 2.86806994 | 1.45852737 | 0.04797842 | 0.1858609  |
| FAM102A     | 1448.59094 | -0.6942295 | 0.04800456 | 0.1859202  |
| RHBDL1      | 25.63259   | -0.7940517 | 0.04805763 | 0.18608376 |
| NACA        | 6606.87491 | 0.38748758 | 0.04809608 | 0.1861906  |
| TBX21       | 6.34053246 | 1.30832632 | 0.04820263 | 0.18651896 |
| ZNF614      | 338.579305 | 0.37619003 | 0.0481959  | 0.18651896 |
| MTX1        | 211.315139 | -0.4339559 | 0.04833236 | 0.18697881 |
| TUBB1       | 13.8998921 | 1.22990984 | 0.04834563 | 0.18698801 |
| BTBD19      | 117.172888 | 1.06758735 | 0.04841785 | 0.18722514 |
| ALG1L       | 11.7183206 | 1.23433823 | 0.04844572 | 0.18727041 |
| CLNS1A      | 1052.71232 | -0.2483101 | 0.04845138 | 0.18727041 |
| ACTR1B      | 990.398666 | -0.4199489 | 0.04849661 | 0.18740303 |
| UNK         | 894.243569 | -0.4496675 | 0.0485101  | 0.18741297 |
| C12orf29    | 181.983759 | 0.38961214 | 0.04857887 | 0.18755883 |
| SLC27A1     | 839.157907 | -0.4590038 | 0.04858063 | 0.18755883 |
| SNX24       | 468.761182 | 0.68117154 | 0.04856966 | 0.18755883 |
| FNTA        | 585.165467 | 0.41370825 | 0.04860868 | 0.18758273 |

|            |            |            |            |            |
|------------|------------|------------|------------|------------|
| GABPB1-AS1 | 655.446376 | -0.5869917 | 0.04860279 | 0.18758273 |
| LDLRAD4-AS | 5.30396785 | 1.27144963 | 0.04866904 | 0.18777345 |
| LOC1005065 | 772.017487 | 0.63836857 | 0.04868544 | 0.18779373 |
| NRXN3      | 397.889538 | 1.06596305 | 0.04869618 | 0.18779373 |
| HERC2P7    | 52.0610545 | -0.6108343 | 0.04872379 | 0.187858   |
| NAIP       | 465.607938 | 0.54969751 | 0.04875068 | 0.18791947 |
| COQ10A     | 111.51998  | -0.5204936 | 0.04880128 | 0.18799372 |
| GAK        | 1326.58165 | -0.3832021 | 0.04880847 | 0.18799372 |
| LOC644762  | 2.09050049 | -1.3782965 | 0.04880488 | 0.18799372 |
| SF3A2      | 561.212167 | -0.5229997 | 0.04881375 | 0.18799372 |
| CARNS1     | 13.6236894 | -1.2949635 | 0.04885303 | 0.18806062 |
| PPFIBP2    | 474.090458 | 0.9673118  | 0.04884749 | 0.18806062 |
| C3orf35    | 29.0771023 | 0.88251267 | 0.04889013 | 0.18812341 |
| FAM228B    | 154.261459 | 0.72979002 | 0.04889126 | 0.18812341 |
| TIPIN      | 86.93965   | -0.4911964 | 0.04894977 | 0.18830633 |
| RPL11      | 5533.53936 | 0.35527993 | 0.04898533 | 0.18840091 |
| BMP8A      | 20.6159621 | 1.26853455 | 0.04907145 | 0.18863607 |
| HEMK1      | 565.947826 | 0.50229489 | 0.04907945 | 0.18863607 |
| NR6A1      | 142.903049 | -0.8361443 | 0.04906115 | 0.18863607 |
| TRNAU1AP   | 168.089339 | 0.4736298  | 0.04919829 | 0.18905052 |
| MME        | 206.817806 | 1.32163701 | 0.04921661 | 0.1890786  |
| IFI35      | 258.840986 | 0.60273506 | 0.04936233 | 0.18955357 |
| PPARA      | 551.776334 | 0.32929869 | 0.04935806 | 0.18955357 |
| LOC1019295 | 9.92928919 | 1.41153706 | 0.0494174  | 0.1897226  |
| BET1L      | 846.935595 | 0.36975851 | 0.04942981 | 0.18972777 |
| ACY3       | 11.0699588 | 1.38196004 | 0.04944455 | 0.18974193 |
| ZNF853     | 256.012989 | -0.4117335 | 0.04945902 | 0.18975504 |
| C19orf52   | 160.250706 | 0.46468728 | 0.04948018 | 0.18979382 |
| BCKDHB     | 524.657289 | 0.65096339 | 0.0495139  | 0.18988071 |
| APLP1      | 285.368886 | -1.01717   | 0.04955277 | 0.18998734 |
| ADAMTS13   | 229.564135 | -0.793791  | 0.04959559 | 0.19010904 |
| ARFIP2     | 473.142953 | 0.42004512 | 0.04964758 | 0.19020139 |
| FCHSD1     | 309.227541 | 0.65696109 | 0.04965292 | 0.19020139 |
| MT1X       | 207.295402 | -1.1593723 | 0.04963861 | 0.19020139 |
| GPT2       | 128.024481 | -0.7802697 | 0.04970057 | 0.19034143 |
| LOC1006528 | 13.0307773 | 1.46568801 | 0.04977182 | 0.19057178 |
| DIXDC1     | 2146.16405 | -0.8137645 | 0.0498474  | 0.19081861 |
| RNF187     | 1472.48569 | -0.4112573 | 0.04994653 | 0.19115544 |
