# Supplementary material for: Transcriptome signatures associated with meningioma progression
Source: Springer Nature journal article supplement (doi:10.1186/s40478-019-0690-x), 2019-04-30
Supplement: MOESM5 [file 25666702]

**Supplementary Table 4: Differentially expressed genes between GR I and GR II/III meningiomas**

| Gene      | baseMean   | log2FoldCha | pvalue   | padj       |
|-----------|------------|-------------|----------|------------|
| SNORA54   | 50.7952454 | 3.19328883  | 2.79E-14 | 4.92E-10   |
| FOXC2     | 1389.28921 | -2.0191834  | 3.32E-13 | 2.92E-09   |
| KIF18B    | 81.0640303 | -2.6077351  | 3.33E-12 | 1.95E-08   |
| ADCY5     | 4074.23155 | -1.387015   | 1.30E-10 | 5.49E-07   |
| HJURP     | 59.5483004 | -2.2349815  | 1.56E-10 | 5.49E-07   |
| FAM111B   | 102.093607 | -2.2998221  | 3.01E-10 | 8.82E-07   |
| CDT1      | 58.4799344 | -2.1300611  | 4.79E-10 | 1.06E-06   |
| SAPCD2    | 34.0228708 | -1.9902187  | 4.83E-10 | 1.06E-06   |
| MKI67     | 845.240137 | -2.0930668  | 6.10E-10 | 1.19E-06   |
| CYB5R4    | 145.174574 | 0.88664356  | 1.54E-09 | 2.70E-06   |
| RPL21     | 3.5798149  | 2.97407395  | 2.58E-09 | 4.13E-06   |
| MYBL2     | 67.1024003 | -2.4627485  | 4.51E-09 | 6.61E-06   |
| H2AFX     | 338.080292 | -1.4034867  | 5.12E-09 | 6.93E-06   |
| FOXO1     | 166.438157 | -2.1536478  | 5.82E-09 | 6.95E-06   |
| TONSL     | 134.679437 | -1.5091557  | 5.93E-09 | 6.95E-06   |
| SLC12A1   | 40.2181579 | 2.8337392   | 8.12E-09 | 8.93E-06   |
| CIT       | 380.131202 | -1.8608533  | 1.32E-08 | 1.37E-05   |
| GSG2      | 18.6302025 | -2.040642   | 1.89E-08 | 1.81E-05   |
| INMT      | 2897.36131 | 2.85688335  | 1.95E-08 | 1.81E-05   |
| IQGAP3    | 201.292766 | -2.0213912  | 2.32E-08 | 2.04E-05   |
| CENPF     | 562.612635 | -1.8298353  | 2.49E-08 | 2.08E-05   |
| LRFN1     | 73.5216663 | -1.4388648  | 3.10E-08 | 2.48E-05   |
| CDCA8     | 29.5819194 | -1.5510073  | 3.89E-08 | 2.98E-05   |
| SAMD5     | 366.169468 | 2.71600725  | 4.24E-08 | 3.01E-05   |
| TROAP     | 60.5998905 | -2.1361303  | 4.28E-08 | 3.01E-05   |
| GATA3     | 37.2947269 | -2.4900474  | 5.40E-08 | 3.61E-05   |
| MEX3A     | 58.6719381 | -2.1564204  | 5.54E-08 | 3.61E-05   |
| XKR5      | 15.3259131 | -2.3931121  | 6.41E-08 | 4.03E-05   |
| NCAPH     | 60.1493133 | -1.6773279  | 8.08E-08 | 4.58E-05   |
| TACC3     | 246.1329   | -1.3366706  | 7.92E-08 | 4.58E-05   |
| TUBB4A    | 26.9385879 | -2.7239338  | 8.00E-08 | 4.58E-05   |
| DHRS9     | 4.24834164 | 2.49258227  | 8.80E-08 | 4.84E-05   |
| TOP2A     | 732.282545 | -1.7132954  | 9.15E-08 | 4.88E-05   |
| BIRC5     | 92.8476479 | -2.0314323  | 1.08E-07 | 5.55E-05   |
| TK1       | 128.862046 | -1.9470042  | 1.11E-07 | 5.55E-05   |
| LINC00312 | 16.5307872 | 2.35238172  | 1.29E-07 | 6.27E-05   |
| SNORA48   | 389.539786 | 1.43209678  | 1.32E-07 | 6.27E-05   |
| HMMR      | 68.5502586 | -1.8065463  | 1.55E-07 | 7.17E-05   |
| FAM57B    | 2.99769318 | -2.6544397  | 1.76E-07 | 7.75E-05   |
| RABGAP1L  | 2205.84068 | 1.02370006  | 1.73E-07 | 7.75E-05   |
| DHCR7     | 568.394165 | -1.5367659  | 2.15E-07 | 9.22E-05   |
| EXO1      | 42.4647914 | -1.9403281  | 2.31E-07 | 9.68E-05   |
| HES7      | 9.36868329 | -1.8864776  | 2.68E-07 | 0.00010975 |
| CKAP2L    | 68.3373256 | -1.8879325  | 3.16E-07 | 0.00011346 |
| CKMT1B    | 11.953546  | -2.5984347  | 3.00E-07 | 0.00011346 |
| FASN      | 2898.41727 | -1.2648917  | 2.96E-07 | 0.00011346 |
| SLC27A2   | 15.8595456 | 2.453663    | 3.11E-07 | 0.00011346 |

|           |            |            |          |            |
|-----------|------------|------------|----------|------------|
| SNAP23    | 772.171453 | 0.47721192 | 3.08E-07 | 0.00011346 |
| WDR62     | 59.2474009 | -1.6448774 | 2.94E-07 | 0.00011346 |
| ASF1B     | 63.2437152 | -1.5293387 | 3.27E-07 | 0.00011499 |
| RRM2      | 178.652762 | -1.9549914 | 3.75E-07 | 0.00012918 |
| E2F8      | 17.1744304 | -2.1115437 | 3.87E-07 | 0.00013081 |
| HIST1H2BO | 105.534224 | -1.6126726 | 4.41E-07 | 0.00014641 |
| LMCD1     | 155.889899 | 2.22831354 | 4.57E-07 | 0.00014901 |
| HIST1H2AL | 96.4948165 | -1.5557106 | 4.84E-07 | 0.00015493 |
| ATP2B2    | 114.190322 | -2.5454491 | 5.60E-07 | 0.00017116 |
| ATP6V0C   | 983.993406 | -0.9302583 | 5.48E-07 | 0.00017116 |
| SGOL1     | 34.2664882 | -1.7740314 | 5.64E-07 | 0.00017116 |
| C9orf172  | 19.9189371 | -2.2023237 | 5.76E-07 | 0.00017187 |
| NUSAP1    | 264.027404 | -1.64722   | 6.50E-07 | 0.00019054 |
| E2F7      | 42.8751019 | -1.7744777 | 6.95E-07 | 0.00020051 |
| ARHGEF39  | 50.3718679 | -1.8967444 | 7.87E-07 | 0.0002122  |
| ASPM      | 332.709337 | -1.9462479 | 7.91E-07 | 0.0002122  |
| DTL       | 145.009427 | -1.706446  | 8.08E-07 | 0.0002122  |
| NNMT      | 196.758136 | 2.26694158 | 8.07E-07 | 0.0002122  |
| SPC25     | 19.8197849 | -2.0919087 | 7.75E-07 | 0.0002122  |
| SPP1      | 3548.40948 | -2.1503879 | 7.70E-07 | 0.0002122  |
| SV2A      | 205.711431 | -2.2793344 | 8.41E-07 | 0.00021744 |
| MYO7B     | 12.5469678 | 2.25994347 | 9.07E-07 | 0.00023134 |
| ZNF777    | 239.322581 | -0.5801578 | 1.12E-06 | 0.00028178 |
| HNRNPUL2  | 568.168082 | -0.6195489 | 1.15E-06 | 0.00028376 |
| PIK3R2    | 1089.03598 | -0.743256  | 1.17E-06 | 0.00028502 |
| CD48      | 36.3051201 | 1.83646959 | 1.24E-06 | 0.00029494 |
| MRPL12    | 298.694681 | -1.3480755 | 1.23E-06 | 0.00029494 |
| BUB1      | 103.226377 | -1.6509057 | 1.39E-06 | 0.000321   |
| BUB1B     | 114.891189 | -1.7124025 | 1.37E-06 | 0.000321   |
| CCDC106   | 223.61957  | -0.7673853 | 1.49E-06 | 0.00034149 |
| GVINP1    | 136.640853 | 1.21231104 | 1.56E-06 | 0.00034667 |
| MTRNR2L9  | 38.3214333 | 1.49372369 | 1.55E-06 | 0.00034667 |
| MYCL      | 73.6429696 | 1.95419987 | 1.84E-06 | 0.00040427 |
| DDX60     | 674.970675 | 0.89307928 | 1.87E-06 | 0.00040629 |
| PDE1C     | 104.418305 | 2.25029012 | 2.03E-06 | 0.00043498 |
| SNORA68   | 57.1790241 | 1.5811485  | 2.05E-06 | 0.00043498 |
| UPK3B     | 149.517152 | -2.1201051 | 2.36E-06 | 0.00049384 |
| MELK      | 84.1834083 | -1.7930083 | 2.43E-06 | 0.00050356 |
| CHRM1     | 96.566855  | -2.3320687 | 2.86E-06 | 0.00058036 |
| KIF20A    | 96.8379339 | -1.7149335 | 2.87E-06 | 0.00058036 |
| LINC00649 | 8.94301587 | 2.20981188 | 3.10E-06 | 0.00061887 |
| CCNB2     | 60.7162711 | -1.8210265 | 3.31E-06 | 0.0006539  |
| HRCT1     | 84.7859688 | -1.6046925 | 3.37E-06 | 0.00065854 |
| CEP55     | 65.3702194 | -1.6929429 | 3.47E-06 | 0.00066417 |
| RECQL4    | 88.9841249 | -1.4096165 | 3.45E-06 | 0.00066417 |
| ANLN      | 275.450442 | -1.6103234 | 3.61E-06 | 0.00068309 |
| LRCH4     | 1261.32814 | -0.7584794 | 3.77E-06 | 0.00070465 |
| BCAR3     | 236.926807 | 1.8897876  | 4.21E-06 | 0.0007804  |
| FLG       | 16.1383328 | -2.230276  | 4.39E-06 | 0.00079535 |
| TIMELESS  | 356.9589   | -0.8792598 | 4.37E-06 | 0.00079535 |

|            |            |            |          |            |
|------------|------------|------------|----------|------------|
| DPP6       | 121.779828 | -2.3300298 | 4.94E-06 | 0.00086082 |
| ESPMP      | 1.71492126 | -2.3367279 | 4.99E-06 | 0.00086082 |
| KIF4A      | 66.8081293 | -1.7436639 | 4.94E-06 | 0.00086082 |
| OR7E2P     | 12.1334293 | 2.20803651 | 4.97E-06 | 0.00086082 |
| PLK1       | 63.9920114 | -1.5336953 | 4.89E-06 | 0.00086082 |
| APLP2      | 19398.266  | -1.0494163 | 5.20E-06 | 0.00088094 |
| PAX2       | 7.79189112 | 2.31099709 | 5.24E-06 | 0.00088094 |
| TMEM223    | 133.900336 | -0.7571325 | 5.26E-06 | 0.00088094 |
| FAM83D     | 29.7931544 | -1.8746654 | 5.54E-06 | 0.00091926 |
| NUF2       | 32.885971  | -1.503286  | 5.74E-06 | 0.0009432  |
| CDCA5      | 60.6547559 | -1.6246869 | 5.88E-06 | 0.00095535 |
| UBAP2L     | 2312.57921 | -0.5555536 | 5.92E-06 | 0.00095535 |
| OLIG1      | 11.3046264 | -2.2795658 | 6.01E-06 | 0.00095962 |
| PAQR4      | 77.5044507 | -1.281895  | 6.06E-06 | 0.00095962 |
| CDC20      | 33.7788291 | -1.6728236 | 6.36E-06 | 0.00098891 |
| IRF4       | 10.4847206 | 1.62332017 | 6.40E-06 | 0.00098891 |
| NEK2       | 28.2347138 | -1.6526384 | 6.41E-06 | 0.00098891 |
| LOC1019269 | 1.68356295 | 2.31201506 | 6.86E-06 | 0.00104857 |
| SNORA46    | 3.7947037  | 2.11791035 | 6.97E-06 | 0.00105762 |
| HIST1H2AI  | 113.200208 | -1.3957637 | 7.10E-06 | 0.00106722 |
| CENPA      | 13.1785921 | -2.0271622 | 7.72E-06 | 0.00113524 |
| COG8       | 375.945812 | -0.5479158 | 7.74E-06 | 0.00113524 |
| NCBP2-AS2  | 141.447313 | -0.6433662 | 7.66E-06 | 0.00113524 |
| GLI4       | 97.8714642 | -0.8516818 | 8.00E-06 | 0.00116266 |
| SLC31A2    | 257.075902 | 1.16184994 | 8.11E-06 | 0.00116985 |
| STARD5     | 43.2399513 | 1.86674065 | 8.26E-06 | 0.00118169 |
| BST2       | 192.297066 | 1.18187489 | 8.39E-06 | 0.00118814 |
| CDC25A     | 61.5241314 | -1.3906176 | 8.53E-06 | 0.00118814 |
| KIAA1161   | 329.040779 | -1.7524767 | 8.58E-06 | 0.00118814 |
| LIX1       | 28.392782  | -2.122695  | 8.51E-06 | 0.00118814 |
| CCDC85B    | 93.9505045 | -0.7352903 | 9.11E-06 | 0.00125177 |
| UBE2C      | 80.7483119 | -1.7938763 | 9.25E-06 | 0.00126182 |
| KIF14      | 85.8147612 | -1.6000775 | 9.59E-06 | 0.00129825 |
| HIST1H2AJ  | 80.8144191 | -1.5149477 | 9.81E-06 | 0.00131777 |
| RRN3P2     | 59.9623176 | 1.54163806 | 1.04E-05 | 0.00138695 |
| SLC29A1    | 1198.71716 | 1.36193672 | 1.05E-05 | 0.00138695 |
| ZDHHC23    | 67.7081576 | -1.836697  | 1.06E-05 | 0.00138695 |
| C19orf54   | 143.740222 | -0.910079  | 1.10E-05 | 0.00141286 |
| CRTAM      | 6.68232808 | 1.89041712 | 1.10E-05 | 0.00141286 |
| KIF11      | 199.972869 | -1.4469048 | 1.11E-05 | 0.00141286 |
| MYPOP      | 57.3529436 | -0.7552698 | 1.10E-05 | 0.00141286 |
| C10orf32   | 344.754718 | 0.93756411 | 1.15E-05 | 0.0014257  |
| EZH2       | 175.620944 | -1.1671562 | 1.14E-05 | 0.0014257  |
| HIST1H3B   | 254.45393  | -1.4854918 | 1.14E-05 | 0.0014257  |
| PPP1R14B   | 555.529416 | -1.0711047 | 1.13E-05 | 0.0014257  |
| DRD2       | 21.0921337 | 2.23908006 | 1.22E-05 | 0.00150179 |
| RPL10      | 5775.59675 | 0.69326202 | 1.29E-05 | 0.00156322 |
| SPRED1     | 1436.66948 | 0.45045419 | 1.29E-05 | 0.00156322 |
| EHMT1      | 1085.72985 | -0.5100029 | 1.37E-05 | 0.0016343  |
| TYRP1      | 6.20261738 | -2.2314795 | 1.36E-05 | 0.0016343  |

|          |            |            |          |            |
|----------|------------|------------|----------|------------|
| CDR2L    | 217.311967 | -1.1704891 | 1.41E-05 | 0.001654   |
| CEACAM21 | 14.2185924 | 1.42545736 | 1.40E-05 | 0.001654   |
| RIPK3    | 25.6285416 | 1.27704678 | 1.40E-05 | 0.001654   |
| GLDC     | 228.420038 | -1.6471388 | 1.44E-05 | 0.00167206 |
| ALAS2    | 7.81130824 | 1.95004045 | 1.47E-05 | 0.00169571 |
| RGS6     | 62.5657692 | 2.18770353 | 1.48E-05 | 0.00169665 |
| OGFRL1   | 1104.58312 | 0.92140738 | 1.49E-05 | 0.00170447 |
| ARRDC1   | 309.173779 | -0.6320918 | 1.53E-05 | 0.00173698 |
| OTX1     | 7.63324393 | -2.1559024 | 1.54E-05 | 0.00173774 |
| BAALC    | 101.365098 | -2.0829846 | 1.64E-05 | 0.00183854 |
| DAAM2    | 389.514326 | 1.57110657 | 1.72E-05 | 0.00185482 |
| FTH1     | 12588.9789 | -0.9131303 | 1.71E-05 | 0.00185482 |
| PKMYT1   | 29.4323405 | -1.6506085 | 1.70E-05 | 0.00185482 |
| SNORA81  | 311.790334 | -0.9368512 | 1.69E-05 | 0.00185482 |
| ST8SIA1  | 126.725692 | 2.16872629 | 1.70E-05 | 0.00185482 |
| UST      | 684.19328  | 1.14460366 | 1.69E-05 | 0.00185482 |
| GREM2    | 11.4756329 | 2.20562936 | 1.75E-05 | 0.00186797 |
| PRRC2C   | 5930.24806 | -0.4488682 | 1.75E-05 | 0.00186797 |
| CABLES2  | 239.12275  | -1.0638635 | 1.78E-05 | 0.00188511 |
| NKD1     | 855.781993 | 2.13780194 | 1.79E-05 | 0.00188615 |
| TEKT3    | 9.345895   | 1.63047831 | 1.82E-05 | 0.00190158 |
| NCAM2    | 29.5336792 | -1.953319  | 1.95E-05 | 0.00202662 |
| FAM46A   | 921.050535 | 1.21512577 | 1.96E-05 | 0.00203106 |
| PCSK1N   | 329.989338 | -1.681595  | 2.01E-05 | 0.00205759 |
| TRIP13   | 50.1865887 | -1.568866  | 2.02E-05 | 0.00205759 |
| VIT      | 369.803382 | 2.12292305 | 2.02E-05 | 0.00205759 |
| KIF13B   | 702.11344  | 0.78673211 | 2.11E-05 | 0.00213413 |
| GPR123   | 2.86475031 | -2.1168612 | 2.14E-05 | 0.00215496 |
| CKMT1A   | 10.4537221 | -2.1677327 | 2.25E-05 | 0.00219097 |
| CKS2     | 73.269701  | -1.3273956 | 2.25E-05 | 0.00219097 |
| IL18R1   | 51.8857673 | 1.46740379 | 2.24E-05 | 0.00219097 |
| JPH1     | 61.1368504 | -1.9588885 | 2.23E-05 | 0.00219097 |
| NBPF25P  | 23.6781919 | 1.03998409 | 2.19E-05 | 0.00219097 |
| RNF214   | 414.411754 | -0.5110835 | 2.23E-05 | 0.00219097 |
| PDLIM5   | 2922.47757 | 0.81620545 | 2.32E-05 | 0.0022304  |
| PM20D2   | 266.454432 | 1.11244589 | 2.31E-05 | 0.0022304  |
| CDH1     | 7416.46071 | -1.1337317 | 2.34E-05 | 0.00223276 |
| PRF1     | 20.4740786 | 1.46142177 | 2.35E-05 | 0.00223538 |
| MAG      | 22.9844483 | -2.1658099 | 2.38E-05 | 0.00225146 |
| RSPO3    | 265.405679 | 2.16357322 | 2.43E-05 | 0.00228698 |
| AKT1S1   | 520.582512 | -0.6929408 | 2.46E-05 | 0.00229923 |
| FAM180B  | 36.3400992 | 2.16366104 | 2.47E-05 | 0.00229923 |
| EBP      | 194.377924 | -0.8935254 | 2.52E-05 | 0.0023205  |
| MME      | 102.358415 | 2.02086911 | 2.51E-05 | 0.0023205  |
| CD300LF  | 11.1613717 | 1.64242723 | 2.55E-05 | 0.00233344 |
| AGR2     | 339.096519 | -2.1616941 | 2.60E-05 | 0.00237295 |
| IGSF5    | 17.4725539 | -1.9063363 | 2.63E-05 | 0.00237689 |
| NEFM     | 58.9800755 | -2.1186521 | 2.63E-05 | 0.00237689 |
| TFG      | 1377.68901 | -0.6463344 | 2.67E-05 | 0.00239888 |
| CCDC146  | 94.7600199 | 1.07388294 | 2.69E-05 | 0.00240177 |

|            |            |            |          |            |
|------------|------------|------------|----------|------------|
| CNIH2      | 9.57425482 | -1.6034805 | 2.70E-05 | 0.00240281 |
| OAZ1       | 2656.88785 | 0.49834615 | 2.73E-05 | 0.00240968 |
| C11orf30   | 598.755316 | -0.4375495 | 2.77E-05 | 0.0024404  |
| AKAP7      | 153.797385 | 1.13857575 | 2.83E-05 | 0.00246469 |
| FAM127B    | 346.929004 | -0.7635246 | 2.86E-05 | 0.00246469 |
| GPR171     | 4.82824115 | 1.7508721  | 2.85E-05 | 0.00246469 |
| PID1       | 245.669167 | 1.86673188 | 2.85E-05 | 0.00246469 |
| CRAT       | 780.023758 | -0.6689415 | 2.89E-05 | 0.00248053 |
| KIF5C      | 121.516293 | -1.856606  | 2.91E-05 | 0.00248626 |
| DNAJC30    | 263.666376 | -0.6416231 | 2.95E-05 | 0.00250739 |
| ESPL1      | 83.4718255 | -1.4882705 | 2.96E-05 | 0.00250739 |
| MARC2      | 142.103579 | -1.1762083 | 3.02E-05 | 0.00254377 |
| COMMD10    | 212.520962 | 0.82849081 | 3.12E-05 | 0.0025888  |
| DSE        | 2115.92783 | 0.91974067 | 3.11E-05 | 0.0025888  |
| HIST1H3C   | 133.160862 | -1.3711253 | 3.12E-05 | 0.0025888  |
| LYST       | 1465.70295 | 0.83722814 | 3.20E-05 | 0.00264438 |
| CXCR6      | 11.4929546 | 1.79993447 | 3.23E-05 | 0.0026586  |
| AURKB      | 23.7697381 | -1.5154242 | 3.31E-05 | 0.00268179 |
| GIT1       | 1233.59455 | -0.7963723 | 3.29E-05 | 0.00268179 |
| SNRNP200   | 5330.60279 | -0.5725524 | 3.28E-05 | 0.00268179 |
| ALG3       | 270.503864 | -0.7953828 | 3.33E-05 | 0.00268937 |
| MIR3648    | 145.903221 | -2.0079559 | 3.36E-05 | 0.00270218 |
| KIAA0101   | 51.3030554 | -1.6630666 | 3.47E-05 | 0.0027759  |
| MEX3B      | 56.1812173 | -1.6379148 | 3.52E-05 | 0.00279989 |
| CCDC126    | 176.472019 | 1.24320283 | 3.64E-05 | 0.00287329 |
| MCM10      | 35.7492435 | -1.5727973 | 3.64E-05 | 0.00287329 |
| PVALB      | 93.3821155 | -2.0700755 | 3.66E-05 | 0.00287329 |
| TGFB3      | 560.995495 | 1.36145479 | 3.68E-05 | 0.00287786 |
| COL8A2     | 1112.8174  | 1.66944671 | 3.73E-05 | 0.00290669 |
| UBXN7      | 835.164915 | -0.3377697 | 3.96E-05 | 0.00306887 |
| FCER1A     | 15.5023216 | 2.00904294 | 4.02E-05 | 0.00309823 |
| LOC1005073 | 167.337807 | -1.8338699 | 4.15E-05 | 0.00317529 |
| RHOD       | 251.7704   | -0.8276442 | 4.19E-05 | 0.00317529 |
| SOX9       | 130.471956 | -2.0449262 | 4.17E-05 | 0.00317529 |
| SYT10      | 3.96003044 | -2.0930193 | 4.14E-05 | 0.00317529 |
| TBC1D32    | 267.697258 | 0.85650066 | 4.33E-05 | 0.0032719  |
| ZNF865     | 271.36676  | -0.880526  | 4.40E-05 | 0.00330995 |
| TEX41      | 6.43724474 | 1.7183386  | 4.43E-05 | 0.00331672 |
| SPAG5      | 182.366099 | -1.2178437 | 4.46E-05 | 0.00332383 |
| CDCA3      | 27.9288671 | -1.3410722 | 4.57E-05 | 0.003391   |
| POLQ       | 80.5866274 | -1.4616995 | 4.64E-05 | 0.00342727 |
| ATG9A      | 953.023008 | -0.6125039 | 4.70E-05 | 0.00345653 |
| KCNA6      | 73.2853661 | 1.98570697 | 4.78E-05 | 0.00350091 |
| PDHA1      | 836.588917 | -0.6586191 | 4.86E-05 | 0.00354864 |
| FST        | 29.3481701 | 2.03006208 | 4.90E-05 | 0.003563   |
| PRKAA2     | 559.486348 | 1.14580665 | 5.01E-05 | 0.00362948 |
| UBQLN4     | 435.830843 | -0.6680334 | 5.05E-05 | 0.00364147 |
| BVES-AS1   | 2.39489742 | 2.0377413  | 5.13E-05 | 0.0036844  |
| CHCHD10    | 119.93423  | -1.5460665 | 5.17E-05 | 0.00369444 |
| ELOVL6     | 288.436023 | -1.0103559 | 5.23E-05 | 0.00372554 |

|            |            |            |          |            |
|------------|------------|------------|----------|------------|
| NBPF9      | 52.2523015 | 0.98087403 | 5.34E-05 | 0.00378535 |
| SLC28A1    | 4.29683427 | 1.99865023 | 5.41E-05 | 0.0038185  |
| SLC25A5    | 1613.91431 | -0.7272247 | 5.47E-05 | 0.00384905 |
| CPQ        | 1355.16841 | 0.83559376 | 5.75E-05 | 0.0040318  |
| UHRF1      | 99.6174098 | -1.2521605 | 5.84E-05 | 0.00407947 |
| RAD51      | 33.5782143 | -1.4630289 | 5.93E-05 | 0.00410971 |
| TIMP2      | 13394.5311 | -1.0407824 | 5.93E-05 | 0.00410971 |
| TMEM242    | 167.470984 | 0.6722053  | 6.06E-05 | 0.0041782  |
| FBN3       | 95.2977436 | -1.8891479 | 6.09E-05 | 0.00418431 |
| CLEC16A    | 1044.04424 | -0.7290124 | 6.12E-05 | 0.00418953 |
| PCLO       | 410.065128 | -1.4863789 | 6.19E-05 | 0.00422027 |
| ZDHHC12    | 138.678433 | -0.8717801 | 6.28E-05 | 0.00426319 |
| CENPU      | 87.1856044 | -1.2386323 | 6.41E-05 | 0.00429078 |
| LZIC       | 201.633309 | 0.65786555 | 6.42E-05 | 0.00429078 |
| MACC1      | 45.4093662 | 1.39139746 | 6.35E-05 | 0.00429078 |
| TMEM37     | 319.807196 | -1.246242  | 6.40E-05 | 0.00429078 |
| CASC5      | 198.434647 | -1.3458046 | 6.57E-05 | 0.00431964 |
| ESRRG      | 26.8381243 | -2.0361324 | 6.52E-05 | 0.00431964 |
| MEN1       | 371.550326 | -0.6144141 | 6.50E-05 | 0.00431964 |
| MYRF       | 52.9594018 | -1.9296068 | 6.58E-05 | 0.00431964 |
| PRAF2      | 265.261773 | -0.7559087 | 6.57E-05 | 0.00431964 |
| WNT6       | 865.164438 | -1.5158792 | 6.74E-05 | 0.00440996 |
| TMEM140    | 127.707968 | 0.90823712 | 7.26E-05 | 0.00472848 |
| C16orf59   | 15.7295677 | -1.5462018 | 7.33E-05 | 0.00475944 |
| ZNF462     | 1318.09156 | -0.5324813 | 7.39E-05 | 0.00477946 |
| THBS1      | 3272.91554 | 1.83427492 | 7.46E-05 | 0.00480743 |
| INCENP     | 270.370027 | -0.6101697 | 7.57E-05 | 0.00485875 |
| COX5A      | 541.80078  | -1.0990473 | 7.67E-05 | 0.00489102 |
| WDR66      | 26.7580177 | 1.36008424 | 7.65E-05 | 0.00489102 |
| BCAN       | 5.73249389 | -2.0137073 | 7.89E-05 | 0.00497323 |
| KATNA1     | 125.783625 | 0.58850767 | 7.84E-05 | 0.00497323 |
| ZNF367     | 182.280284 | -1.1346577 | 7.87E-05 | 0.00497323 |
| DAPP1      | 34.2941552 | 1.48317886 | 8.11E-05 | 0.00507165 |
| FBXO41     | 423.202272 | -0.9473254 | 8.12E-05 | 0.00507165 |
| FGF7       | 229.605366 | 1.96699608 | 8.13E-05 | 0.00507165 |
| CCR2       | 19.7584521 | 1.66502375 | 8.27E-05 | 0.00512761 |
| PIWIL2     | 12.5818086 | 1.6059227  | 8.31E-05 | 0.00512761 |
| SESN1      | 1445.00515 | 1.15608296 | 8.28E-05 | 0.00512761 |
| SLC27A6    | 59.0761017 | -2.0045168 | 8.40E-05 | 0.00516429 |
| FLJ22184   | 16.1699142 | -1.6502576 | 8.45E-05 | 0.00517647 |
| SLC52A3    | 23.9363324 | -1.9598946 | 8.48E-05 | 0.00517772 |
| ZNF136     | 281.106161 | 0.73730799 | 8.51E-05 | 0.00517802 |
| UFSP1      | 18.8595752 | -1.2600169 | 8.65E-05 | 0.00524924 |
| TMEM71     | 31.5320569 | 1.39575805 | 8.70E-05 | 0.00526104 |
| DLAT       | 670.595031 | -0.688207  | 8.87E-05 | 0.00534384 |
| CCDC62     | 7.42325815 | 1.3298651  | 9.08E-05 | 0.00544817 |
| TGIF1      | 328.288533 | 0.7988463  | 9.23E-05 | 0.00552108 |
| LOC1002890 | 166.362292 | -1.2125769 | 9.32E-05 | 0.00555972 |
| COQ9       | 710.198822 | -1.0236323 | 9.49E-05 | 0.0056023  |
| FAM222A    | 17.933353  | -1.2529535 | 9.52E-05 | 0.0056023  |

|            |            |            |            |            |
|------------|------------|------------|------------|------------|
| RTP4       | 28.9686581 | 1.35479415 | 9.49E-05   | 0.0056023  |
| SMG7       | 1802.67069 | -0.7283352 | 9.47E-05   | 0.0056023  |
| LRFN4      | 213.521887 | -1.4276789 | 9.57E-05   | 0.00560963 |
| C9orf72    | 243.181113 | 0.8559946  | 9.73E-05   | 0.00566854 |
| UBE2Z      | 1700.62018 | -0.4014566 | 9.73E-05   | 0.00566854 |
| NCAPG      | 117.069425 | -1.4571243 | 9.82E-05   | 0.00567946 |
| ZMYND19    | 146.160019 | -0.6512032 | 9.80E-05   | 0.00567946 |
| APBB2      | 3408.65417 | 0.9745954  | 9.93E-05   | 0.00568737 |
| FABP7      | 5.08655889 | -1.9976343 | 9.92E-05   | 0.00568737 |
| RSAD2      | 117.875292 | 1.18931741 | 9.91E-05   | 0.00568737 |
| TEX36      | 11.7558724 | -1.7025179 | 9.97E-05   | 0.00569189 |
| AGBL1      | 65.0639658 | -1.984122  | 0.00010048 | 0.00572    |
| LMNB1      | 198.243813 | -1.074809  | 0.00010111 | 0.00573511 |
| PSKH1      | 714.493095 | -0.6341934 | 0.0001014  | 0.00573511 |
| SYT1       | 25.6917807 | -1.874263  | 0.00010257 | 0.00578257 |
| FAM189B    | 392.032837 | -1.0076961 | 0.00010426 | 0.00585924 |
| BANF1      | 457.605743 | -0.8724491 | 0.00010643 | 0.00590199 |
| HCN2       | 58.7038159 | -1.6339585 | 0.00010559 | 0.00590199 |
| LOC1005075 | 72.6661634 | 1.20703012 | 0.00010612 | 0.00590199 |
| MAP3K5     | 596.352752 | 1.19285589 | 0.00010651 | 0.00590199 |
| TAF1A-AS1  | 15.1303148 | -1.1459154 | 0.0001067  | 0.00590199 |
| LOC1006535 | 102.166809 | -1.0523943 | 0.00011022 | 0.00607754 |
| PIGR       | 16.6089573 | 1.97642802 | 0.00011063 | 0.00608097 |
| PCYT1A     | 502.460279 | -0.3982214 | 0.00011369 | 0.00622966 |
| PRR14      | 291.323827 | -0.5740449 | 0.00011438 | 0.0062482  |
| BST1       | 120.344152 | 1.57565974 | 0.00011586 | 0.00630101 |
| PROC       | 2.28232483 | -1.9656599 | 0.00011673 | 0.00630101 |
| SERPINI1   | 55.6598327 | 1.30349696 | 0.00011608 | 0.00630101 |
| ZNF672     | 319.863488 | -0.7152926 | 0.00011678 | 0.00630101 |
| GIN1       | 121.185957 | 0.65654779 | 0.00011735 | 0.00631232 |
| SLC6A6     | 881.456994 | 1.35270165 | 0.00011822 | 0.00633966 |
| ZNF620     | 63.0210166 | -0.744258  | 0.00011885 | 0.00635428 |
| LOC1005068 | 12.8711807 | 1.15633382 | 0.00011922 | 0.00635498 |
| TESK1      | 397.669135 | -0.6949335 | 0.00012155 | 0.00645576 |
| ZNF467     | 170.797125 | -1.1739981 | 0.00012185 | 0.00645576 |
| FAM105A    | 924.117731 | 1.12593947 | 0.0001227  | 0.00646222 |
| UBALD2     | 229.608995 | -0.588905  | 0.00012265 | 0.00646222 |
| CXorf22    | 23.6285936 | -1.915154  | 0.00012598 | 0.00654264 |
| HAPLN4     | 55.9645956 | -1.7602596 | 0.00012609 | 0.00654264 |
| IMMT       | 1231.05069 | -0.5854557 | 0.00012464 | 0.00654264 |
| SQRDL      | 489.363498 | 0.75143209 | 0.00012505 | 0.00654264 |
| TBC1D17    | 549.955146 | -0.4108706 | 0.00012552 | 0.00654264 |
| NDUFA8     | 318.248749 | -0.7156648 | 0.00012658 | 0.00654887 |
| CCNYL1     | 509.464347 | -0.6941949 | 0.00012966 | 0.00668807 |
| STK31      | 20.2289013 | 1.4242463  | 0.00013011 | 0.00669173 |
| POLI       | 395.978981 | 0.79503536 | 0.00013067 | 0.0067009  |
| TPI1P2     | 14.7744256 | -1.2494453 | 0.0001318  | 0.00673935 |
| DENND5B    | 451.472325 | 0.81267986 | 0.00013291 | 0.00675681 |
| HSD11B1    | 15.5189228 | 1.9623083  | 0.00013271 | 0.00675681 |
| NAV1       | 4831.43604 | -1.2462141 | 0.00013357 | 0.00677104 |

|          |            |            |            |            |
|----------|------------|------------|------------|------------|
| GTF2E1   | 192.393595 | -0.4906111 | 0.00013618 | 0.00686408 |
| KCNS2    | 4.20395567 | -1.942567  | 0.00013619 | 0.00686408 |
| C11orf84 | 224.346657 | -0.6133481 | 0.00013677 | 0.00687375 |
| AP1S2    | 253.222327 | 1.03878608 | 0.00013879 | 0.00693549 |
| FSIP2    | 107.839853 | 1.91431437 | 0.00013852 | 0.00693549 |
| USP45    | 246.585227 | 0.66309201 | 0.00014032 | 0.00699203 |
| TEAD2    | 301.693732 | -0.9371278 | 0.00014096 | 0.00700415 |
| PRRX1    | 1829.93048 | 1.69979064 | 0.00014231 | 0.00705153 |
| ECT2L    | 6.37056898 | 1.67400408 | 0.00014552 | 0.0071677  |
| HPR      | 24.2702459 | 1.86315386 | 0.00014588 | 0.0071677  |
| TMEM63C  | 4.77884541 | -1.8168387 | 0.00014573 | 0.0071677  |
| PMS2P5   | 110.465706 | -0.6068234 | 0.00014722 | 0.0072133  |
| AIM1     | 130.762604 | 1.13108009 | 0.0001542  | 0.00721505 |
| ARHGAP23 | 2179.87123 | -0.6636683 | 0.00014962 | 0.00721505 |
| CGN      | 32.566676  | -1.599882  | 0.0001528  | 0.00721505 |
| EPHA3    | 212.681755 | -1.7319762 | 0.00015293 | 0.00721505 |
| FBRSL1   | 576.01492  | -0.7556971 | 0.00015346 | 0.00721505 |
| FOXK2    | 832.222547 | -0.5984467 | 0.0001519  | 0.00721505 |
| INTU     | 289.605265 | 0.95293486 | 0.00015423 | 0.00721505 |
| KCNE1    | 17.2076683 | 1.67783481 | 0.00014917 | 0.00721505 |
| LY75     | 28.050055  | 1.34732875 | 0.00015039 | 0.00721505 |
| PLSCR1   | 281.480473 | 0.5780889  | 0.00014938 | 0.00721505 |
| PPP5C    | 761.089928 | -0.4413249 | 0.00015054 | 0.00721505 |
| PRCC     | 557.396445 | -0.4922176 | 0.00015258 | 0.00721505 |
| PRR11    | 145.367974 | -1.3187197 | 0.00015357 | 0.00721505 |
| RMI1     | 99.4802141 | -0.6986817 | 0.00014902 | 0.00721505 |
| SMAD6    | 448.617935 | -1.2271272 | 0.00015243 | 0.00721505 |
| TNC      | 402.402724 | 1.8493607  | 0.0001531  | 0.00721505 |
| ZNF812   | 88.9351678 | 1.66853239 | 0.00015282 | 0.00721505 |
| ECH1     | 763.27479  | -0.650323  | 0.00015695 | 0.00730375 |
| RAB31    | 1181.12518 | 1.01819327 | 0.00015684 | 0.00730375 |
| OLFM1    | 147.066869 | -1.6067274 | 0.00015836 | 0.00734991 |
| IL33     | 41.443055  | 1.72790304 | 0.00015951 | 0.00738361 |
| ATP1A3   | 49.6906851 | -1.8501377 | 0.0001602  | 0.00739597 |
| ZC3H12D  | 67.2415498 | 1.13460863 | 0.0001616  | 0.00744135 |
| CLPTM1   | 1457.57449 | -0.4755516 | 0.00016435 | 0.00752828 |
| EP400    | 2272.55801 | -0.5860004 | 0.0001643  | 0.00752828 |
| TTK      | 44.4089323 | -1.3183532 | 0.00016547 | 0.00756007 |
| CLEC4A   | 39.4387689 | 1.05547806 | 0.00016598 | 0.00756378 |
| SIDT1    | 114.276164 | -1.668502  | 0.00016823 | 0.00764629 |
| C4orf19  | 255.926909 | -1.5905084 | 0.00017381 | 0.00787947 |
| SYNGR3   | 35.0597034 | -1.92422   | 0.0001759  | 0.00795387 |
| CD6      | 13.1443165 | 1.4179925  | 0.00017715 | 0.00798904 |
| NR3C1    | 1953.92573 | 0.75448223 | 0.00017758 | 0.00798904 |
| CDC6     | 84.1473931 | -1.2194748 | 0.00017942 | 0.00803485 |
| MMP15    | 417.196123 | -1.6528548 | 0.00017952 | 0.00803485 |
| MYLK2    | 3.27862054 | -1.7925107 | 0.00018029 | 0.00804883 |
| ATCAY    | 3.36818337 | -1.9233803 | 0.00018099 | 0.00805993 |
| APOL1    | 530.621411 | 1.03705088 | 0.00018567 | 0.00820012 |
| PBK      | 38.0584567 | -1.5696181 | 0.00018509 | 0.00820012 |



|            |            |            |            |            |
|------------|------------|------------|------------|------------|
| PLS1       | 123.938268 | 1.53431272 | 0.00018541 | 0.00820012 |
| SETD1A     | 667.888907 | -0.6144524 | 0.00018601 | 0.00820012 |
| CCR7       | 7.85244231 | 1.51777018 | 0.00018808 | 0.00820907 |
| KBTBD12    | 10.1854184 | 1.78735729 | 0.0001876  | 0.00820907 |
| LRFN3      | 103.098441 | -0.7143417 | 0.00018675 | 0.00820907 |
| TRAP1      | 864.544188 | -0.7541584 | 0.00018786 | 0.00820907 |
| FANCA      | 126.550092 | -1.1825617 | 0.00019036 | 0.00826779 |
| PPP2R3C    | 157.863317 | 0.77367472 | 0.00018992 | 0.00826779 |
| EIF4A2     | 3952.07585 | 0.61597081 | 0.00019099 | 0.00827445 |
| SNORD15A   | 3.9619909  | 1.56992838 | 0.00019311 | 0.00832553 |
| SYTL2      | 223.194879 | 1.34702697 | 0.0001931  | 0.00832553 |
| FOXO2-AS1  | 518.977041 | -0.7247344 | 0.00019811 | 0.00849951 |
| IFI44L     | 211.654678 | 1.19171858 | 0.00019786 | 0.00849951 |
| CNTD2      | 10.4942447 | -1.646522  | 0.0002034  | 0.00864212 |
| IDUA       | 342.406851 | -0.972191  | 0.00020297 | 0.00864212 |
| LOC1001315 | 562.580351 | 0.76526778 | 0.00020335 | 0.00864212 |
| NPIP3      | 299.797242 | -1.0260914 | 0.00020197 | 0.00864212 |
| SNORA27    | 7.90069366 | 1.07227848 | 0.00020465 | 0.00867416 |
| MAP4K2     | 387.968439 | -0.4827269 | 0.00020712 | 0.00874479 |
| SPC24      | 22.4131091 | -1.2279812 | 0.00020731 | 0.00874479 |
| ATP2B4     | 9740.97413 | -0.6004066 | 0.00020945 | 0.00881383 |
| IGSF9B     | 411.056669 | -1.35515   | 0.00021122 | 0.0088674  |
| EMP1       | 6568.40477 | 0.8830188  | 0.00021225 | 0.00886967 |
| STXB5      | 520.934543 | 0.98797357 | 0.00021229 | 0.00886967 |
| ERCC6L     | 17.1004845 | -1.3548097 | 0.00021332 | 0.00887329 |
| ZFP2       | 36.3249637 | 1.16591663 | 0.00021338 | 0.00887329 |
| FFAR2      | 2.45971494 | 1.8427776  | 0.000216   | 0.00896076 |
| AACS       | 523.087218 | -0.7427629 | 0.00022063 | 0.00904527 |
| CLEC7A     | 456.501222 | 1.34579062 | 0.00022112 | 0.00904527 |
| CREBL2     | 1076.54047 | 0.62366782 | 0.00021915 | 0.00904527 |
| DCTPP1     | 185.232775 | -0.6493446 | 0.00021997 | 0.00904527 |
| MCM2       | 281.115036 | -0.8609655 | 0.00021861 | 0.00904527 |
| VGF        | 2.46037864 | -1.8986569 | 0.00022078 | 0.00904527 |
| CD164      | 3711.79589 | 0.59211108 | 0.00022212 | 0.00906516 |
| DPYSL5     | 6.23242565 | -1.8245267 | 0.00022295 | 0.00907809 |
| EPN1       | 1153.68787 | -0.5298968 | 0.00022494 | 0.00911914 |
| KIF27      | 146.108885 | 0.76753361 | 0.000225   | 0.00911914 |
| BLM        | 58.3408023 | -1.3599573 | 0.00022804 | 0.00921739 |
| ZWINT      | 95.1698552 | -1.2013669 | 0.00022847 | 0.00921739 |
| CEND1      | 27.1844942 | -1.7094941 | 0.00023127 | 0.00927035 |
| PIK3R1     | 3698.25152 | 1.34675958 | 0.00023136 | 0.00927035 |
| PTGES2     | 480.014016 | -0.7352544 | 0.00023041 | 0.00927035 |
| RUNX2      | 223.578535 | 1.54746456 | 0.00023212 | 0.00927934 |
| CXCL11     | 12.5161466 | 1.60222018 | 0.00023762 | 0.00945659 |
| ZNF775     | 70.3907826 | -0.5888633 | 0.00023755 | 0.00945659 |
| FDPS       | 884.026021 | -0.6576732 | 0.00023952 | 0.00951052 |
| DRD4       | 13.8652944 | -1.2391792 | 0.00024215 | 0.00959322 |
| FREM2      | 3969.11009 | -1.7256748 | 0.00024513 | 0.0096894  |
| R3HDM1     | 552.299597 | -0.4591327 | 0.00024782 | 0.00977401 |
| BNIP1      | 65.032466  | 0.55289705 | 0.00025402 | 0.00994569 |

|           |            |            |            |            |
|-----------|------------|------------|------------|------------|
| GPR64     | 486.942181 | -1.7637025 | 0.00025302 | 0.00994569 |
| IFIT3     | 479.849476 | 0.70832287 | 0.00025444 | 0.00994569 |
| NLRP3     | 239.351435 | 1.36141968 | 0.00025362 | 0.00994569 |
| TEX21P    | 3.75423579 | 1.59688558 | 0.00025779 | 0.0100543  |
| TIGD5     | 105.906753 | -0.6666573 | 0.00025866 | 0.01006586 |
| PDPN      | 717.616315 | -1.0281068 | 0.00026007 | 0.01009851 |
| C7orf13   | 61.4262235 | -1.4090647 | 0.00026148 | 0.01013088 |
| NCL       | 4820.21214 | -0.5292549 | 0.00026692 | 0.01031906 |
| FAM180A   | 87.8081712 | 1.86882252 | 0.00026908 | 0.01032376 |
| HMBS      | 135.953336 | -1.0483013 | 0.00026855 | 0.01032376 |
| SCG2      | 204.338677 | 1.85597271 | 0.00026997 | 0.01032376 |
| SNORA72   | 3.39391047 | 1.73352806 | 0.00027008 | 0.01032376 |
| UPK3BL    | 70.142603  | -1.2551297 | 0.00027057 | 0.01032376 |
| XG        | 1.61446475 | 1.80302539 | 0.00026848 | 0.01032376 |
| SAMD10    | 64.6597453 | -1.2725594 | 0.00027148 | 0.01033627 |
| MLC1      | 10.2200631 | -1.7697808 | 0.00027256 | 0.01035476 |
| ATXN2     | 1345.63981 | -0.4851931 | 0.00027417 | 0.01036337 |
| FAM120A   | 3869.92837 | -0.3595869 | 0.00027455 | 0.01036337 |
| NCAN      | 32.5993958 | -1.8704163 | 0.00027422 | 0.01036337 |
| CACNG4    | 79.7878476 | -1.7877195 | 0.00027576 | 0.0103644  |
| TOMM7     | 1055.82931 | 0.6703041  | 0.00027569 | 0.0103644  |
| FPGT      | 269.68476  | 0.81431677 | 0.00027922 | 0.01047212 |
| OAS2      | 242.499042 | 0.8966106  | 0.00028019 | 0.01048625 |
| CDK16     | 1086.80276 | -0.4844745 | 0.00028436 | 0.0105749  |
| DLGAP5    | 34.4550669 | -1.4623963 | 0.00028424 | 0.0105749  |
| PCNXL3    | 1311.68132 | -0.6576424 | 0.00028316 | 0.0105749  |
| SEZ6L2    | 545.105035 | -1.5567236 | 0.00028541 | 0.01059166 |
| C10orf10  | 210.097451 | 1.30267053 | 0.00028627 | 0.01060098 |
| PLEKHG2   | 1379.66757 | -0.7302272 | 0.00028723 | 0.01061441 |
| PRC1      | 433.139382 | -1.1555381 | 0.00028819 | 0.01062748 |
| SUSD2     | 94.5345744 | -1.6529285 | 0.0002899  | 0.01066818 |
| NOB1      | 468.982517 | -0.6807417 | 0.00029322 | 0.01076788 |
| OPA3      | 793.87245  | -0.4882549 | 0.0002948  | 0.01080327 |
| CD300C    | 37.8247051 | 1.21344042 | 0.00029723 | 0.01083804 |
| ESCO2     | 30.8887832 | -1.2417175 | 0.00029819 | 0.01083804 |
| HIST1H2AM | 138.544927 | -1.0416952 | 0.00029823 | 0.01083804 |
| SNORA20   | 6.87675837 | 1.62999398 | 0.00029883 | 0.01083804 |
| SPATA9    | 3.30575699 | 1.8083566  | 0.00029795 | 0.01083804 |
| CD300LB   | 6.64300026 | 1.44520454 | 0.00030362 | 0.01096637 |
| GFRA1     | 1109.79819 | 1.85520251 | 0.00030309 | 0.01096637 |
| ALCAM     | 9746.0414  | 0.83791174 | 0.00030784 | 0.01109602 |
| GPX3      | 670.721187 | 1.48846131 | 0.00031094 | 0.01118481 |
| FOXL2NB   | 6.68484407 | -1.758502  | 0.00031404 | 0.01127322 |
| MIR4697HG | 269.543671 | -1.3398562 | 0.00031598 | 0.01131999 |
| CORIN     | 18.8552646 | 1.72762265 | 0.00031667 | 0.01132147 |
| ISG15     | 156.205295 | 1.01319209 | 0.0003178  | 0.0113391  |
| CDKN3     | 27.1741125 | -1.3621936 | 0.00032042 | 0.01140916 |
| ARHGDI1   | 2933.35323 | -0.5722576 | 0.00032579 | 0.01141563 |
| CCNA2     | 81.7149116 | -1.2070347 | 0.00032366 | 0.01141563 |
| CCNF      | 80.9304504 | -1.0843309 | 0.00032553 | 0.01141563 |

|           |            |            |            |            |
|-----------|------------|------------|------------|------------|
| COX7B     | 858.640947 | -0.7994163 | 0.00032409 | 0.01141563 |
| FADS2     | 1375.19473 | -1.2722738 | 0.00032198 | 0.01141563 |
| IFIT2     | 313.023953 | 0.80659595 | 0.00032416 | 0.01141563 |
| PHYHIP    | 28.9783989 | -1.6837327 | 0.00032315 | 0.01141563 |
| TRIM9     | 52.1587527 | 1.59580221 | 0.00032504 | 0.01141563 |
| TNNI2     | 4.92155035 | 1.71627748 | 0.00033352 | 0.01166341 |
| C4orf48   | 54.8334369 | -1.1827969 | 0.00033701 | 0.01176185 |
| CDH8      | 97.7039636 | -1.7318958 | 0.00034003 | 0.01177398 |
| CNOT3     | 478.942488 | -0.568887  | 0.00033994 | 0.01177398 |
| HIST2H3D  | 44.4354818 | -1.2053578 | 0.00033965 | 0.01177398 |
| TMEM151A  | 3.45934977 | -1.8421416 | 0.00033817 | 0.01177398 |
| CHEK1     | 90.6303311 | -1.0679252 | 0.00034112 | 0.01178831 |
| ADPRM     | 62.5806161 | 0.83175944 | 0.0003433  | 0.01179434 |
| CD247     | 9.89399053 | 1.48837034 | 0.00034281 | 0.01179434 |
| NUP214    | 1505.39717 | -0.3611044 | 0.00034207 | 0.01179434 |
| ITGA8     | 242.601177 | 1.73125049 | 0.00034472 | 0.01182007 |
| AMICA1    | 80.9566025 | 1.33464349 | 0.00034613 | 0.01184524 |
| TXK       | 39.2854192 | 1.41999763 | 0.00034852 | 0.0119039  |
| FAM114A2  | 359.724447 | 0.46602164 | 0.00034972 | 0.01192152 |
| ARRDC3    | 2570.05246 | 1.25583187 | 0.000357   | 0.01212286 |
| RGS9BP    | 5.83173819 | -1.6975078 | 0.0003566  | 0.01212286 |
| ZAK       | 926.562975 | 0.72474548 | 0.00036509 | 0.01237357 |
| SIGMAR1   | 597.623214 | -0.5298744 | 0.00036999 | 0.01251546 |
| ADCY10P1  | 70.2877855 | 1.3692347  | 0.00037218 | 0.01255785 |
| TCF7L1    | 574.217216 | -0.813005  | 0.00037267 | 0.01255785 |
| TLR2      | 720.006014 | 1.14347851 | 0.00037563 | 0.01261745 |
| TRAF4     | 595.275102 | -0.7916523 | 0.00037587 | 0.01261745 |
| DGKD      | 885.32875  | -0.8337344 | 0.00037714 | 0.01262068 |
| INMT-FAM1 | 5.44777256 | 1.81647289 | 0.0003776  | 0.01262068 |
| RBPMS2    | 262.679732 | -1.216272  | 0.00037812 | 0.01262068 |
| ATP6VOE2  | 524.280896 | -0.8610488 | 0.00037889 | 0.0126225  |
| AAED1     | 91.9558205 | 0.59526257 | 0.00038019 | 0.01264202 |
| BRD3      | 1082.62033 | -0.5816047 | 0.00038156 | 0.01266332 |
| CCDC86    | 204.514476 | -0.7366473 | 0.00038537 | 0.01276581 |
| LCA5      | 94.2640025 | 1.00640963 | 0.00038896 | 0.01286047 |
| TEC       | 111.143581 | 1.13333713 | 0.00039364 | 0.012991   |
| LHCGR     | 114.897837 | 1.75473045 | 0.00039468 | 0.01300063 |
| DTWD1     | 272.182944 | 0.51778623 | 0.00039586 | 0.01300295 |
| HHIP-AS1  | 43.8063011 | -1.6929007 | 0.00039696 | 0.01300295 |
| TICRR     | 57.8854213 | -1.5856762 | 0.00039695 | 0.01300295 |
| PHF12     | 826.08144  | -0.4265477 | 0.00039787 | 0.0130083  |
| ITPKA     | 9.58417332 | -1.5902849 | 0.00040071 | 0.01305273 |
| TERF2     | 416.465787 | -0.5494538 | 0.00040045 | 0.01305273 |
| ARHGAP39  | 173.782108 | -0.852134  | 0.00040701 | 0.0131289  |
| ECHDC3    | 12.1640194 | 1.56160482 | 0.00040902 | 0.0131289  |
| HACE1     | 258.6982   | 0.74000157 | 0.00040867 | 0.0131289  |
| IL6ST     | 10372.169  | 0.61868154 | 0.00040697 | 0.0131289  |
| LY6H      | 18.2078942 | -1.791041  | 0.00040382 | 0.0131289  |
| NPLOC4    | 1528.63467 | -0.5003301 | 0.00040756 | 0.0131289  |
| RNFT2     | 144.453353 | -1.5315322 | 0.00040791 | 0.0131289  |

|            |            |            |            |            |
|------------|------------|------------|------------|------------|
| RWDD3      | 52.6028447 | 0.77143383 | 0.00040813 | 0.0131289  |
| ANGPTL5    | 28.6184835 | 1.8009638  | 0.00041343 | 0.01323144 |
| BCORL1     | 381.167261 | -0.8628377 | 0.00041748 | 0.01323144 |
| GABRQ      | 13.0521452 | -1.772165  | 0.00041721 | 0.01323144 |
| ITGB4      | 9527.50398 | -1.2847384 | 0.00041473 | 0.01323144 |
| PCGF5      | 1843.75785 | 0.8967184  | 0.00041731 | 0.01323144 |
| PSMG2      | 371.067929 | 0.60937018 | 0.00041424 | 0.01323144 |
| STK17B     | 464.570012 | 1.08043741 | 0.00041594 | 0.01323144 |
| CHRD2      | 3.31518216 | -1.7894875 | 0.00042102 | 0.01329657 |
| HUNK       | 50.3183101 | -1.344042  | 0.00042105 | 0.01329657 |
| FAM69B     | 276.998471 | -0.7091701 | 0.00042375 | 0.013358   |
| CCNE2      | 43.4123556 | -1.1979793 | 0.00042669 | 0.01342647 |
| CMPK1      | 1112.98894 | 0.59595519 | 0.00042804 | 0.0134272  |
| ZBP1       | 5.43126313 | 1.46383314 | 0.00042824 | 0.0134272  |
| SCAF4      | 756.605242 | -0.6030953 | 0.00043247 | 0.01353589 |
| LINC00607  | 142.49431  | 1.37875928 | 0.00043417 | 0.01356492 |
| VMO1       | 30.6308049 | 1.30995123 | 0.00043776 | 0.01365282 |
| TM7SF2     | 298.763556 | -1.0692821 | 0.00044035 | 0.0137094  |
| IGSF9      | 70.1731762 | -1.3728054 | 0.00044165 | 0.01372552 |
| PLAC9      | 122.913253 | 1.70201292 | 0.00044683 | 0.01386182 |
| AKAP1      | 1036.36415 | -0.8121052 | 0.00044973 | 0.01392751 |
| KCNH1      | 19.561271  | -1.6404016 | 0.00045665 | 0.01411684 |
| ABTB2      | 209.081426 | -1.2245323 | 0.00045872 | 0.01415587 |
| ELP2       | 921.045707 | 0.6098781  | 0.00045981 | 0.01416462 |
| KIAA0195   | 1160.87258 | -0.4583408 | 0.000462   | 0.01420718 |
| MLST8      | 366.789292 | -0.6219156 | 0.00046867 | 0.01438714 |
| SNORA57    | 187.926466 | 1.03061276 | 0.0004716  | 0.01445193 |
| FAM198A    | 1224.83032 | 1.34775223 | 0.00047369 | 0.01446571 |
| TBC1D13    | 610.926846 | -0.3002822 | 0.00047345 | 0.01446571 |
| RNF44      | 734.490657 | -0.4960643 | 0.00047465 | 0.01446996 |
| LOC1019273 | 7.63735121 | 1.70532904 | 0.00048242 | 0.01468123 |
| PRX        | 364.677496 | 1.26656489 | 0.00048643 | 0.01477781 |
| ACACB      | 1092.73551 | -0.6269323 | 0.00049608 | 0.0150449  |
| LOC1005066 | 95.2437536 | -1.6844097 | 0.00049755 | 0.01506341 |
| IFT43      | 73.2569459 | 0.7491709  | 0.00050207 | 0.01512777 |
| KCNJ3      | 10.8182997 | 1.78493648 | 0.00050225 | 0.01512777 |
| ZNF423     | 1714.83136 | -0.7268706 | 0.0005013  | 0.01512777 |
| COMMD8     | 100.213998 | 0.67583097 | 0.00051027 | 0.01531695 |
| SMC4       | 1105.37663 | -0.9005417 | 0.00050982 | 0.01531695 |
| SAMHD1     | 928.120179 | 0.84742437 | 0.00051459 | 0.01542015 |
| GRIK2      | 16.4238168 | 1.48633808 | 0.000517   | 0.01544698 |
| IL12RB1    | 27.9559498 | 1.10793307 | 0.00051724 | 0.01544698 |
| ABCG4      | 25.4852897 | -1.4665661 | 0.00052017 | 0.01545571 |
| ANKRD52    | 1712.45412 | -0.7238782 | 0.00052016 | 0.01545571 |
| THAP8      | 44.1752848 | -0.8416921 | 0.00051844 | 0.01545571 |
| C5orf66    | 26.9533777 | -1.7017877 | 0.00052156 | 0.01547101 |
| LOC1005061 | 8.12480053 | 1.42405342 | 0.00052269 | 0.01547828 |
| RHOBTB3    | 753.136103 | 1.60545822 | 0.00052387 | 0.01548727 |
| DVL3       | 1417.25627 | -0.4471127 | 0.00053163 | 0.01569011 |
| BRINP2     | 1.7090732  | -1.7663031 | 0.00053391 | 0.01573105 |

|            |            |            |            |            |
|------------|------------|------------|------------|------------|
| LINC00899  | 19.5447284 | 1.01312958 | 0.00053713 | 0.01579959 |
| CALCOCO1   | 3493.32472 | 0.66365335 | 0.00053915 | 0.01583249 |
| SNORA76C   | 7.58209681 | 1.59784007 | 0.00054166 | 0.01587962 |
| DEDD       | 373.565474 | -0.3165357 | 0.00054391 | 0.01589325 |
| SASH1      | 707.905901 | 1.19709653 | 0.00054393 | 0.01589325 |
| SLC7A14    | 490.207095 | -1.7643402 | 0.0005461  | 0.01593026 |
| RAB3A      | 46.6074591 | -1.0299987 | 0.00054865 | 0.01595296 |
| ZNF570     | 126.223985 | 0.61630701 | 0.00054869 | 0.01595296 |
| GOT1       | 554.609153 | -1.0871807 | 0.00055056 | 0.01598073 |
| CLEC10A    | 27.0928777 | 1.70442122 | 0.0005544  | 0.01602736 |
| LPIN2      | 922.627809 | 0.828656   | 0.0005547  | 0.01602736 |
| SETD5      | 2774.98225 | -0.4775621 | 0.0005549  | 0.01602736 |
| MARK1      | 648.494192 | -1.1805344 | 0.00055602 | 0.01603333 |
| SQLE       | 484.471623 | -1.1762146 | 0.00055761 | 0.01605297 |
| GET4       | 289.196534 | -0.4324585 | 0.00056245 | 0.01611326 |
| RTN3       | 2147.87717 | -0.4936435 | 0.00056154 | 0.01611326 |
| SRCIN1     | 45.8184274 | -1.4312402 | 0.00056237 | 0.01611326 |
| PRNCR1     | 61.289505  | -1.2688342 | 0.00056435 | 0.01611499 |
| TRIM47     | 187.888626 | -1.099577  | 0.00056389 | 0.01611499 |
| GPR21      | 64.6712267 | -0.7859985 | 0.00056898 | 0.01621487 |
| POLR1B     | 619.043974 | -0.6476012 | 0.00056969 | 0.01621487 |
| ZNF780A    | 521.780475 | 0.51870871 | 0.00057129 | 0.0162342  |
| ATP8B3     | 133.483461 | -1.3541126 | 0.00057329 | 0.01626488 |
| STAT4      | 12.6385604 | 1.26653699 | 0.00057593 | 0.01631338 |
| GPKOW      | 240.546861 | 0.35121016 | 0.00057715 | 0.01632177 |
| TAF4       | 353.93982  | -0.8277686 | 0.00058251 | 0.0164467  |
| ABCA3      | 1991.39951 | -0.8190156 | 0.00058874 | 0.01651969 |
| CREBRF     | 1415.21206 | 0.46400175 | 0.00058719 | 0.01651969 |
| F5         | 35.4527683 | -1.7391984 | 0.00058885 | 0.01651969 |
| GRIN1      | 8.33564623 | -1.7659356 | 0.00058697 | 0.01651969 |
| CNTN4      | 511.387956 | 1.67881399 | 0.00059323 | 0.01661127 |
| FBXO22-AS1 | 1.81562895 | -1.7602836 | 0.000594   | 0.01661127 |
| DAPK2      | 76.8680076 | 1.38536329 | 0.00059573 | 0.01663317 |
| ZBTB24     | 389.874381 | 0.6839447  | 0.0005979  | 0.01666741 |
| OAS1       | 262.874353 | 0.66661199 | 0.00059973 | 0.01669198 |
| ZNF629     | 928.118515 | -0.4169228 | 0.0006024  | 0.01673977 |
| ARRDC4     | 553.879342 | -1.0893213 | 0.00060428 | 0.01676533 |
| EPM2A      | 102.270071 | 0.68002568 | 0.00061199 | 0.01689943 |
| GSTM1      | 15.6464808 | -1.7536691 | 0.00061101 | 0.01689943 |
| GTF2H5     | 294.876947 | 0.63082083 | 0.00061144 | 0.01689943 |
| MRPS5      | 489.172677 | -0.5808466 | 0.00061429 | 0.01693638 |
| C5orf56    | 39.0002888 | 0.87511901 | 0.0006188  | 0.01698886 |
| CCDC23     | 92.6751453 | 0.77944759 | 0.00061926 | 0.01698886 |
| DNAJC4     | 320.021597 | -0.6467883 | 0.00062006 | 0.01698886 |
| SLC24A1    | 475.659578 | -0.6798136 | 0.00061863 | 0.01698886 |
| SOX8       | 18.9243392 | -1.2910443 | 0.00062433 | 0.01707922 |
| LLGL2      | 346.843196 | -1.2897627 | 0.00062878 | 0.01717426 |
| LOC1030918 | 37.60704   | -0.977154  | 0.00063022 | 0.01718706 |
| MASP1      | 40.469208  | 1.69657645 | 0.00063156 | 0.01719683 |
| DEPDC1     | 40.6776099 | -1.2355744 | 0.00063524 | 0.01727025 |

|           |            |            |            |            |
|-----------|------------|------------|------------|------------|
| CCDC144A  | 292.273202 | -1.6061191 | 0.00063845 | 0.0173041  |
| SEC14L5   | 8.71510166 | -1.4847561 | 0.00063813 | 0.0173041  |
| XAF1      | 558.454296 | 0.82155873 | 0.00064411 | 0.01743056 |
| BOC       | 4426.76207 | 1.32711879 | 0.00064767 | 0.01749995 |
| PRSS23    | 566.519414 | 1.23322343 | 0.00065538 | 0.01768131 |
| C16orf54  | 19.2289416 | 1.15332857 | 0.00065651 | 0.01768463 |
| CERS2     | 4042.99363 | -0.5583752 | 0.00066655 | 0.01781601 |
| CMTM2     | 3.34249336 | 1.62163149 | 0.00066243 | 0.01781601 |
| FAM19A2   | 26.3905342 | 0.97119367 | 0.00066684 | 0.01781601 |
| LAMC2     | 87.7307388 | -1.4525177 | 0.00066717 | 0.01781601 |
| MRPS2     | 283.818669 | -0.564537  | 0.00066747 | 0.01781601 |
| TATDN2    | 1156.10332 | -0.5355433 | 0.00066728 | 0.01781601 |
| ADORA1    | 11.9665477 | -1.4007846 | 0.0006704  | 0.01784209 |
| EPN3      | 32.7775118 | -1.6699652 | 0.00067047 | 0.01784209 |
| ANKRA2    | 253.376954 | 0.52825273 | 0.00068259 | 0.01800856 |
| GJA3      | 90.4196127 | -1.6870954 | 0.00068048 | 0.01800856 |
| PGP       | 305.082739 | -0.5748915 | 0.00068354 | 0.01800856 |
| POLN      | 58.2848447 | 0.8346727  | 0.00068278 | 0.01800856 |
| SYN1      | 33.4942971 | -1.0122078 | 0.0006839  | 0.01800856 |
| TERC      | 698.249161 | -1.0093162 | 0.00068284 | 0.01800856 |
| ZNF768    | 386.135216 | -0.4474849 | 0.0006792  | 0.01800856 |
| BCL2      | 618.417534 | 1.24103621 | 0.00068626 | 0.0180437  |
| PCGF2     | 513.511009 | -0.6284921 | 0.00069247 | 0.0181798  |
| PCAT1     | 11.933166  | -1.41005   | 0.00069357 | 0.01818154 |
| SLC26A4   | 11.8801551 | 1.36429454 | 0.00069644 | 0.01820254 |
| VAMP5     | 123.79583  | 1.00210968 | 0.00069625 | 0.01820254 |
| LOC151475 | 8.73259242 | 1.6437356  | 0.00070035 | 0.01827756 |
| MEF2D     | 1658.85447 | -0.4544054 | 0.00070725 | 0.01843042 |
| KLHL6     | 134.140627 | 1.09338099 | 0.00070936 | 0.0184307  |
| MGAM      | 95.8588144 | 1.30969194 | 0.00070877 | 0.0184307  |
| AICDA     | 1.3935683  | 1.73361337 | 0.00071465 | 0.01848743 |
| EFCAB12   | 4.80134365 | -1.4590905 | 0.00071549 | 0.01848743 |
| NLRP12    | 10.7581509 | 1.43509916 | 0.00071574 | 0.01848743 |
| SAYSD1    | 124.412289 | 0.72862066 | 0.00071544 | 0.01848743 |
| GPM6A     | 32.4870844 | -1.6804744 | 0.0007173  | 0.0185004  |
| LARP1     | 4971.46735 | -0.5289115 | 0.00072122 | 0.01857432 |
| LOXL3     | 179.946148 | 1.30722965 | 0.00072321 | 0.01859831 |
| PLCD3     | 2264.05525 | -0.6563351 | 0.00072446 | 0.01860338 |
| DPH6-AS1  | 16.3454428 | 1.1334482  | 0.00072946 | 0.01867707 |
| ZC3H3     | 276.573113 | -0.5067905 | 0.00072871 | 0.01867707 |
| SRCAP     | 2828.66378 | -0.4675429 | 0.00073103 | 0.0186902  |
| HMGA2     | 60.5557373 | -1.6953002 | 0.00073226 | 0.01869441 |
| FUS       | 2232.18599 | -0.8533825 | 0.0007341  | 0.0187142  |
| TMX1      | 464.433402 | 0.50123569 | 0.00073534 | 0.01871876 |
| AUNIP     | 5.44180801 | -1.442769  | 0.0007396  | 0.01875852 |
| CLASRP    | 518.714182 | -0.4973292 | 0.00073863 | 0.01875852 |
| RNF208    | 22.8658994 | -0.9755788 | 0.0007401  | 0.01875852 |
| SSPN      | 445.22142  | 1.46001697 | 0.00074546 | 0.01886723 |
| CDK1      | 115.213209 | -1.2225416 | 0.0007496  | 0.01887725 |
| ELMOD3    | 185.911549 | 0.56892542 | 0.00074748 | 0.01887725 |

|            |            |            |            |            |
|------------|------------|------------|------------|------------|
| OASL       | 35.9697193 | 1.3953151  | 0.00074904 | 0.01887725 |
| TMEM8A     | 573.487519 | -0.6592683 | 0.00075015 | 0.01887725 |
| ITGB5      | 1042.54733 | 1.01550564 | 0.00075536 | 0.01898108 |
| PDZK1IP1   | 6.41398065 | 1.7282132  | 0.00075696 | 0.01899426 |
| RASD1      | 58.9430648 | 1.63642629 | 0.0007587  | 0.01901075 |
| ATG4C      | 152.249376 | 0.73982908 | 0.00076542 | 0.01915184 |
| CC2D2B     | 7.66815468 | 1.24068274 | 0.00076687 | 0.01916083 |
| PKDREJ     | 4.73309015 | 1.62941349 | 0.00077474 | 0.01933007 |
| TPX2       | 316.109967 | -1.2546908 | 0.00077781 | 0.01937917 |
| POLR1A     | 1231.63425 | -0.474804  | 0.00078226 | 0.01942011 |
| SH3BP4     | 718.070325 | 1.1118275  | 0.00078277 | 0.01942011 |
| STRADA     | 528.576915 | -0.4622899 | 0.00078207 | 0.01942011 |
| WHSC1      | 1346.05782 | -0.6679012 | 0.00078625 | 0.01947912 |
| NAA35      | 366.439475 | -0.3517087 | 0.000788   | 0.01949496 |
| HNRNPUL1   | 2919.68325 | -0.3005057 | 0.0007969  | 0.01960473 |
| LIG1       | 420.835765 | -0.7369048 | 0.0007963  | 0.01960473 |
| LRRK2      | 873.992373 | 0.8179721  | 0.00079552 | 0.01960473 |
| RABGGTB    | 351.594057 | 0.56523747 | 0.00079622 | 0.01960473 |
| EME1       | 33.0575484 | -1.2786408 | 0.00080251 | 0.0197153  |
| ANGPTL7    | 101.955482 | 1.38795895 | 0.00080498 | 0.01974842 |
| RNF26      | 428.885173 | -0.6439039 | 0.00081307 | 0.01991915 |
| KIF18A     | 28.1279117 | -1.2439904 | 0.00081933 | 0.02004452 |
| NOD2       | 39.8504384 | 1.28018057 | 0.00082084 | 0.02005354 |
| TMEM246    | 1276.54676 | -0.7173837 | 0.00082443 | 0.02011341 |
| ATP5I      | 656.012373 | -0.5761399 | 0.0008261  | 0.02012608 |
| ZNF444     | 168.065277 | -0.5284299 | 0.00083489 | 0.02031222 |
| RNF125     | 157.74378  | 0.93996954 | 0.00083675 | 0.02032939 |
| MDH2       | 1390.38919 | -0.6392659 | 0.00083977 | 0.02037445 |
| TMEM134    | 140.205126 | -0.5171753 | 0.00084397 | 0.02044833 |
| SKA3       | 39.3125432 | -1.2364612 | 0.00086012 | 0.02081098 |
| MAZ        | 1133.81199 | -0.5185187 | 0.00086683 | 0.02094449 |
| SNHG17     | 111.045606 | -0.834907  | 0.0008766  | 0.02115131 |
| POLR2D     | 395.885823 | -0.3531347 | 0.00088003 | 0.02120499 |
| KPNA2      | 504.216966 | -0.8988128 | 0.00088308 | 0.02124945 |
| MCOLN2     | 20.1765127 | 1.38611838 | 0.00089231 | 0.02141312 |
| OR56B1     | 11.030116  | 1.33654706 | 0.00089185 | 0.02141312 |
| CNTN2      | 34.9796086 | -1.643711  | 0.00089432 | 0.02143202 |
| SCARNA2    | 3048.52922 | 0.83464158 | 0.00090115 | 0.02156634 |
| CSNK1D     | 2033.1721  | -0.6409651 | 0.00090403 | 0.02159742 |
| RIMS1      | 30.3491435 | -1.6532323 | 0.00090491 | 0.02159742 |
| CALML3-AS1 | 39.5295346 | -1.5875127 | 0.0009078  | 0.02160775 |
| ELN        | 2210.35411 | 1.54911259 | 0.00090662 | 0.02160775 |
| ABCB6      | 470.169809 | -0.5830816 | 0.00091039 | 0.02164012 |
| APOL6      | 810.490677 | 0.64891747 | 0.00092073 | 0.0217467  |
| CDH7       | 26.4467898 | -1.6987976 | 0.0009201  | 0.0217467  |
| GOT2       | 1028.52592 | -0.5777315 | 0.00092211 | 0.0217467  |
| IL18RAP    | 10.3666287 | 1.60531864 | 0.00091987 | 0.0217467  |
| MCM4       | 765.122384 | -0.8864387 | 0.0009224  | 0.0217467  |
| PMVK       | 238.6111   | -0.6620978 | 0.00091787 | 0.0217467  |
| SPAG8      | 37.6194156 | 0.94165172 | 0.00092352 | 0.0217467  |

|            |            |            |            |            |
|------------|------------|------------|------------|------------|
| MALT1      | 526.940268 | 0.64251047 | 0.0009269  | 0.02179703 |
| COLGALT2   | 24.3323051 | -1.5157432 | 0.00092987 | 0.02183768 |
| OIP5       | 11.3246478 | -1.3091058 | 0.00093487 | 0.0219257  |
| WNT9A      | 118.75772  | -0.8552457 | 0.00094944 | 0.0222378  |
| CSPG5      | 19.9155185 | -1.4021514 | 0.0009544  | 0.02229469 |
| STAG1      | 1119.99183 | 0.31344564 | 0.000954   | 0.02229469 |
| B9D2       | 25.3105556 | 0.95196137 | 0.00096284 | 0.02244409 |
| COMTD1     | 36.9305474 | -0.9662192 | 0.00096335 | 0.02244409 |
| AMN1       | 78.929731  | 0.53319841 | 0.00096603 | 0.02247692 |
| SLC7A1     | 778.922323 | -1.5005092 | 0.00096884 | 0.02251246 |
| POLR3K     | 90.0604691 | -0.707779  | 0.00098281 | 0.02279772 |
| SERPINB9   | 585.821468 | 0.99988304 | 0.00098371 | 0.02279772 |
| SLC25A39   | 937.682927 | -0.4686624 | 0.00098718 | 0.02284813 |
| SF3B5      | 367.622169 | 0.52705448 | 0.00099303 | 0.02295318 |
| RICTOR     | 1223.15271 | 0.46184361 | 0.00099772 | 0.02303131 |
| MGAT4A     | 1055.48437 | 0.84904213 | 0.00100004 | 0.0230547  |
| ARL16      | 259.412152 | -0.5035543 | 0.00100707 | 0.02315593 |
| MORC3      | 1008.96353 | 0.44155911 | 0.00100645 | 0.02315593 |
| BZW2       | 213.738735 | -0.7693154 | 0.00101706 | 0.02335518 |
| SOX18      | 68.2754286 | -1.2027017 | 0.00102098 | 0.02341473 |
| CD300E     | 15.9858621 | 1.5191015  | 0.0010256  | 0.0234594  |
| GPC3       | 204.304664 | -1.6617582 | 0.00102462 | 0.0234594  |
| NTN4       | 413.956708 | 1.31985067 | 0.00103302 | 0.02356786 |
| SERINC1    | 4765.64937 | 0.59389746 | 0.00103213 | 0.02356786 |
| PLEC       | 21119.1972 | -0.6504132 | 0.00103536 | 0.02359056 |
| CKS1B      | 94.9805578 | -0.8094054 | 0.00104001 | 0.02362981 |
| PCDH10     | 11.2207642 | -1.6597985 | 0.0010409  | 0.02362981 |
| ZNF383     | 114.141583 | 0.47017274 | 0.00104111 | 0.02362981 |
| ADAM28     | 286.798688 | 1.14182644 | 0.00104478 | 0.02368259 |
| GZMA       | 11.9375567 | 1.45579651 | 0.00104779 | 0.02368728 |
| RELN       | 854.65471  | -1.6845648 | 0.00104903 | 0.02368728 |
| TMEM127    | 1269.82833 | -0.3782614 | 0.00104789 | 0.02368728 |
| FEN1       | 237.019663 | -0.6508164 | 0.00105543 | 0.02380126 |
| DNMT3A     | 773.242333 | -0.6589495 | 0.0010579  | 0.02382653 |
| RPS6KA5    | 65.5958639 | 0.82672101 | 0.001061   | 0.02386578 |
| ANP32B     | 1141.99694 | -0.8931546 | 0.00106415 | 0.02387554 |
| KIFAP3     | 766.375719 | 0.49595471 | 0.00106368 | 0.02387554 |
| PCDHB5     | 604.36811  | -1.2066907 | 0.00106711 | 0.02388091 |
| PSMC5      | 880.370864 | -0.4811021 | 0.00106692 | 0.02388091 |
| LOC1005056 | 8.57202714 | -1.190293  | 0.00107338 | 0.02393009 |
| MGRN1      | 1067.30745 | -0.4359741 | 0.00107262 | 0.02393009 |
| TMEM19     | 543.411898 | 0.5970375  | 0.00107317 | 0.02393009 |
| MYO1E      | 629.230247 | 0.9714611  | 0.00107479 | 0.02393112 |
| IL11RA     | 363.324887 | 1.16684634 | 0.00107985 | 0.02401338 |
| GNG12      | 1024.73374 | 0.82755839 | 0.00108231 | 0.02403077 |
| SNORA8     | 42.5785516 | 0.82955108 | 0.00108337 | 0.02403077 |
| HDAC4      | 2299.03017 | -0.7444871 | 0.00108788 | 0.02410058 |
| JPH3       | 39.4660634 | -1.6725893 | 0.00109539 | 0.02423632 |
| MT3        | 68.5162386 | -1.5444395 | 0.00109882 | 0.02426394 |
| RBFADN     | 6.49763942 | 1.32857728 | 0.0010994  | 0.02426394 |



|            |            |            |            |            |
|------------|------------|------------|------------|------------|
| LINC00158  | 8.45878298 | 1.49559334 | 0.00110186 | 0.02428785 |
| IL2ORA     | 36.5973998 | 1.53347918 | 0.00110496 | 0.02432562 |
| ITGAL      | 128.382463 | 1.1134683  | 0.00111017 | 0.02437106 |
| SEPT5      | 9.53015983 | -1.2365542 | 0.00111019 | 0.02437106 |
| TMEM219    | 628.20608  | 0.3647446  | 0.00111118 | 0.02437106 |
| FAM95A     | 30.7282062 | -1.6017842 | 0.0011227  | 0.02459314 |
| DAO        | 2.11890062 | 1.58648331 | 0.00112974 | 0.02471653 |
| CLEC9A     | 55.3265936 | 1.6121298  | 0.00113214 | 0.02473821 |
| LOC1019296 | 11.1727499 | 1.63204752 | 0.00114082 | 0.02489701 |
| DCC        | 219.514783 | 1.64737564 | 0.00114474 | 0.02494476 |
| ZC2HC1C    | 125.300603 | 1.34904484 | 0.00114584 | 0.02494476 |
| SNX9       | 979.100046 | 0.54578172 | 0.0011476  | 0.02495212 |
| CENPN      | 138.655407 | -1.0443479 | 0.00115206 | 0.02498528 |
| SLC14A2    | 8.23485044 | 1.50963729 | 0.00115339 | 0.02498528 |
| TAF15      | 808.588318 | -0.567172  | 0.00115298 | 0.02498528 |
| HIST1H3G   | 99.1812688 | -1.308637  | 0.0011605  | 0.0251085  |
| CS         | 2179.76067 | -0.529897  | 0.00116881 | 0.02525712 |
| THAP4      | 472.218264 | -0.4770179 | 0.00117358 | 0.02532923 |
| GLIPR1     | 645.402751 | 0.64347593 | 0.00118297 | 0.02550061 |
| RABL6      | 1034.16655 | -0.4263493 | 0.0011872  | 0.02556046 |
| ELL2       | 806.48783  | 1.09202164 | 0.00119    | 0.02556546 |
| NUP210     | 786.785757 | -0.9178991 | 0.00119034 | 0.02556546 |
| CERS5      | 640.738754 | -0.5324956 | 0.00120422 | 0.02582324 |
| ZMYND15    | 79.2494955 | 1.03211769 | 0.00120528 | 0.02582324 |
| LOC80154   | 16.8812641 | -1.0620171 | 0.00121347 | 0.0259671  |
| AURKA      | 66.9420466 | -1.2333079 | 0.00122181 | 0.02611295 |
| LOC399715  | 51.5993357 | 1.11530182 | 0.00122565 | 0.02611295 |
| NDUFA10    | 842.745808 | -0.4138668 | 0.00122623 | 0.02611295 |
| SLC5A12    | 4.74215997 | 1.57816814 | 0.00122509 | 0.02611295 |
| CDH26      | 14.0610137 | 1.18447934 | 0.00122952 | 0.02611996 |
| TNFAIP3    | 1147.4414  | 1.03952777 | 0.00122827 | 0.02611996 |
| BBS9       | 646.563368 | 0.97924307 | 0.00123246 | 0.0261508  |
| SF3B4      | 487.560974 | -0.552363  | 0.00123553 | 0.02618434 |
| GANAB      | 6139.28984 | -0.4498447 | 0.00124027 | 0.02622154 |
| JADE3      | 290.582377 | -0.6314249 | 0.00123987 | 0.02622154 |
| SSRP1      | 1356.39972 | -0.434937  | 0.00124329 | 0.0262538  |
| FBXO8      | 266.620987 | 0.3902239  | 0.0012531  | 0.02642925 |
| CSNK2A2    | 390.969314 | -0.4377229 | 0.00125924 | 0.02652705 |
| C1orf123   | 252.291551 | 0.59320941 | 0.00126362 | 0.02656196 |
| SLC24A5    | 10.6412288 | 1.61249705 | 0.00126392 | 0.02656196 |
| TMPO-AS1   | 44.4499    | -0.6820172 | 0.00126807 | 0.02661727 |
| ATP5B      | 5987.12229 | -0.6757806 | 0.00127117 | 0.02665053 |
| TMEM11     | 152.66174  | -0.4659695 | 0.00127272 | 0.02665134 |
| NME9       | 3.64187204 | 1.64136848 | 0.00128059 | 0.02678436 |
| CYS1       | 165.531856 | 1.57451786 | 0.00128213 | 0.02678454 |
| HLA-DRB5   | 506.403834 | 1.61285999 | 0.00128624 | 0.02683869 |
| NDUFS8     | 775.46535  | -0.614962  | 0.00128971 | 0.02687904 |
| COL20A1    | 3.8768435  | -1.6535922 | 0.00129566 | 0.02693928 |
| GATAD2B    | 1304.30886 | -0.3835576 | 0.00129457 | 0.02693928 |
| CTGF       | 11035.6066 | 1.40065875 | 0.00129911 | 0.02697909 |

|            |            |            |            |            |
|------------|------------|------------|------------|------------|
| TCF3       | 713.086961 | -0.5311534 | 0.00130294 | 0.02702676 |
| LINC00663  | 84.3316825 | 0.54209834 | 0.00130886 | 0.02705387 |
| PLEKHB1    | 66.9747366 | -1.4176162 | 0.00130592 | 0.02705387 |
| POM121     | 965.083411 | -0.4953533 | 0.00130806 | 0.02705387 |
| GS1-259H13 | 17.3960998 | 1.11776046 | 0.0013139  | 0.0270627  |
| RGL1       | 1270.66502 | 0.94118081 | 0.00131238 | 0.0270627  |
| SNORA74A   | 182.308408 | -1.0126991 | 0.00131179 | 0.0270627  |
| COLCA2     | 62.3665539 | -1.3469181 | 0.00131589 | 0.02707204 |
| DNM1       | 75.5388127 | -1.1611811 | 0.00132111 | 0.02713064 |
| RSP02      | 58.7120293 | -1.6458034 | 0.00132183 | 0.02713064 |
| UBALD1     | 175.546366 | -0.7903937 | 0.00132964 | 0.02725907 |
| LOC440300  | 106.631912 | 0.94786482 | 0.00133702 | 0.02729914 |
| PTTG2      | 3.70810624 | 1.44606592 | 0.0013378  | 0.02729914 |
| RAB7A      | 2623.53422 | -0.4418496 | 0.00133767 | 0.02729914 |
| RNF148     | 26.4814227 | -1.23633   | 0.00133576 | 0.02729914 |
| MKRN7P     | 17.4713453 | 1.22635634 | 0.00134467 | 0.02739068 |
| MTERFD2    | 478.818441 | -0.4167512 | 0.0013454  | 0.02739068 |
| ABCC8      | 2.87409957 | -1.6221682 | 0.00135568 | 0.02744162 |
| PAICS      | 1231.84201 | -0.8085988 | 0.001353   | 0.02744162 |
| RAPGEF6    | 1124.94941 | 0.4843541  | 0.00135564 | 0.02744162 |
| SNORD89    | 3.10219059 | 1.57898042 | 0.00135203 | 0.02744162 |
| TPCN2      | 344.960531 | -0.5198442 | 0.0013557  | 0.02744162 |
| MTNR1A     | 12.2730164 | -1.6394793 | 0.00135737 | 0.02744388 |
| TLK1       | 1154.75141 | -0.4146357 | 0.00135983 | 0.02746203 |
| SAMD1      | 108.514442 | -0.5509032 | 0.00136594 | 0.02755377 |
| SYNPO2     | 1853.96087 | 1.48657655 | 0.00136802 | 0.02756412 |
| PRR12      | 958.689686 | -0.5760224 | 0.00138149 | 0.0278037  |
| PDF        | 19.816098  | -1.0327413 | 0.00138316 | 0.02780537 |
| MCM6       | 421.781001 | -0.6534222 | 0.00138978 | 0.02787483 |
| SLITRK5    | 6.22754416 | -1.5388201 | 0.00138835 | 0.02787483 |
| CYSLTR2    | 9.59179348 | 1.36435445 | 0.00139225 | 0.0278926  |
| CCDC79     | 1.72630963 | 1.49650093 | 0.00139477 | 0.02789283 |
| UBE2T      | 50.5326878 | -1.1073308 | 0.00139543 | 0.02789283 |
| CYTIP      | 91.1643092 | 1.07216293 | 0.00140048 | 0.02793024 |
| EPST11     | 133.223497 | 0.77249949 | 0.00139975 | 0.02793024 |
| MRPL24     | 411.604492 | -0.5981415 | 0.00140499 | 0.02795682 |
| SPOPL      | 810.603571 | 0.74133618 | 0.00140437 | 0.02795682 |
| AHCTF1P1   | 11.2114699 | -0.868518  | 0.00141134 | 0.028042   |
| LOC1019270 | 131.818656 | 0.69127198 | 0.00141246 | 0.028042   |
| ZNF831     | 11.1606371 | 1.37429114 | 0.00142365 | 0.02823232 |
| ITK        | 21.9293646 | 1.32337114 | 0.00143263 | 0.02837841 |
| SNAP25     | 32.3155352 | -1.6252169 | 0.00143946 | 0.02848153 |
| ZEB1       | 1625.20311 | 0.70690341 | 0.00144473 | 0.02855361 |
| LINC00667  | 435.163276 | 0.58349405 | 0.00144652 | 0.02855706 |
| E2F1       | 210.102873 | -1.0563453 | 0.00145128 | 0.02861876 |
| BRIP1      | 119.926644 | -1.1053964 | 0.00145604 | 0.02868053 |
| MILR1      | 39.3232951 | 1.13344544 | 0.00145988 | 0.02872398 |
| RAB38      | 25.8871521 | -1.3711423 | 0.00146461 | 0.02878492 |
| NXPH2      | 284.108686 | 1.62944719 | 0.00147131 | 0.0288844  |
| AKR1B10    | 20.012381  | 1.5911946  | 0.00148494 | 0.02899318 |

|          |            |            |            |            |
|----------|------------|------------|------------|------------|
| COX6A1   | 1396.20748 | -0.6050737 | 0.00147899 | 0.02899318 |
| IGIP     | 424.005829 | 0.59459427 | 0.00148353 | 0.02899318 |
| OTOA     | 4.40539136 | 1.43931426 | 0.00148147 | 0.02899318 |
| PLCB1    | 727.423642 | 1.45111089 | 0.0014851  | 0.02899318 |
| CD300A   | 165.709922 | 1.01227363 | 0.00149755 | 0.02920389 |
| CCDC137  | 204.245612 | -0.5126836 | 0.00150869 | 0.02926732 |
| FARSB    | 485.074803 | -0.4908173 | 0.00151079 | 0.02926732 |
| KCNA3    | 24.6793099 | 1.18161341 | 0.00150585 | 0.02926732 |
| TCP10L   | 17.8010776 | 1.19738959 | 0.00150927 | 0.02926732 |
| TRAPPC2  | 216.405084 | 0.54737081 | 0.00150804 | 0.02926732 |
| TSTD3    | 54.867222  | 0.91996324 | 0.00150247 | 0.02926732 |
| CHL1     | 14.4692145 | -1.6161702 | 0.00151359 | 0.02928937 |
| ARHGAP15 | 121.001076 | 1.00092051 | 0.00151934 | 0.02936841 |
| GABRA3   | 33.7975409 | -1.6116361 | 0.00152273 | 0.02937541 |
| PAPPA    | 801.580257 | 1.50984894 | 0.00152472 | 0.02937541 |
| SCARNA16 | 127.648356 | -0.8714572 | 0.00152387 | 0.02937541 |
| IDH3G    | 507.408287 | -0.2950119 | 0.0015305  | 0.0294025  |
| MPP6     | 1044.19467 | 1.17843046 | 0.00152846 | 0.0294025  |
| PLEKHG4B | 2041.61936 | -1.0243914 | 0.00153114 | 0.0294025  |
| RAB23    | 752.300689 | 0.86757535 | 0.0015345  | 0.0294228  |
| TRIM23   | 472.935211 | 0.38100748 | 0.00153554 | 0.0294228  |
| BVES     | 112.697872 | 1.39057521 | 0.00154633 | 0.02959379 |
| PMPCA    | 483.653955 | -0.4500768 | 0.00154783 | 0.02959379 |
| TRG-AS1  | 8.29341296 | 1.25769398 | 0.00155395 | 0.02967862 |
| RAB32    | 117.125978 | 0.64824332 | 0.00156584 | 0.02987326 |
| LAMTOR4  | 387.285617 | 0.41712254 | 0.00156854 | 0.02987679 |
| TNR      | 2.712065   | -1.6208946 | 0.00156942 | 0.02987679 |
| CTBS     | 307.039196 | 0.65243551 | 0.00158367 | 0.03010559 |
| RSRP1    | 660.875733 | 0.72026967 | 0.00158658 | 0.03010559 |
| SH3PXD2A | 11024.5558 | -0.7419111 | 0.00158572 | 0.03010559 |
| CHDC2    | 13.1726755 | -1.5756331 | 0.00159253 | 0.03012685 |
| COPS6    | 737.681825 | -0.481135  | 0.00159284 | 0.03012685 |
| PAK4     | 781.702373 | -0.8133537 | 0.00159172 | 0.03012685 |
| IGF2BP2  | 542.015584 | -1.5412335 | 0.00159724 | 0.03017768 |
| ACACA    | 2078.23521 | -0.4435394 | 0.00160366 | 0.03026659 |
| STAT2    | 3164.70421 | 0.49696027 | 0.00161116 | 0.03037545 |
| APC2     | 35.4121764 | -1.3798412 | 0.00161421 | 0.03040029 |
| FLJ31104 | 7.2132584  | 1.09406216 | 0.00161654 | 0.03040179 |
| SYF2     | 346.226975 | 0.63485875 | 0.00161774 | 0.03040179 |
| LILRA1   | 47.5292939 | 1.20939823 | 0.0016228  | 0.03045895 |
| TBCD     | 1236.20968 | -0.3926595 | 0.00162425 | 0.03045895 |
| KIAA0825 | 231.68004  | 0.8163375  | 0.00163249 | 0.030581   |
| GRIA2    | 5.5608161  | -1.6183002 | 0.00164344 | 0.03075329 |
| POLDIP2  | 1134.39862 | -0.4680379 | 0.00164964 | 0.0308365  |
| C9orf129 | 15.0271815 | -1.4023515 | 0.00165337 | 0.03087335 |
| GLTSCR1  | 226.203054 | -0.8675457 | 0.00166085 | 0.03095241 |
| LIMS2    | 468.944192 | -0.8762968 | 0.00166112 | 0.03095241 |
| STC2     | 130.502167 | -1.4926157 | 0.00166338 | 0.03096184 |
| SUPT6H   | 2501.31431 | -0.2681252 | 0.00168141 | 0.03126419 |
| C10orf35 | 22.1245893 | -1.1472514 | 0.00168665 | 0.03131469 |

|           |            |            |            |            |
|-----------|------------|------------|------------|------------|
| NME4      | 873.127687 | -0.7117093 | 0.00168768 | 0.03131469 |
| LINC01277 | 1.69621764 | 1.43017947 | 0.00170229 | 0.03155255 |
| SCML4     | 6.00842836 | 1.30498436 | 0.00170525 | 0.03157402 |
| RAB43     | 39.7794904 | -0.5998854 | 0.00171229 | 0.03167112 |
| AGPS      | 739.299146 | 0.67050074 | 0.00171767 | 0.03170384 |
| WDR5      | 510.273618 | -0.3900488 | 0.00171726 | 0.03170384 |
| TLX1      | 10.0286466 | 1.54301906 | 0.00172198 | 0.03175009 |
| HIST2H2BE | 875.112893 | -0.8964036 | 0.00173067 | 0.03185284 |
| UBE2Q1    | 833.327736 | -0.2618728 | 0.00173117 | 0.03185284 |
| POM121C   | 803.611042 | -0.491357  | 0.00174166 | 0.0320123  |
| SCD       | 2092.2465  | -1.258293  | 0.00175423 | 0.03220974 |
| SLA       | 528.934328 | 1.03464139 | 0.00175651 | 0.03221788 |
| ERMARD    | 227.395089 | 0.56180886 | 0.00176498 | 0.03233951 |
| KIRREL3   | 4.21006064 | -1.5232235 | 0.00177394 | 0.03246991 |
| BIRC2     | 1104.7721  | 0.31639805 | 0.00179131 | 0.03275383 |
| ATAD2     | 550.299426 | -0.7826232 | 0.0017945  | 0.03277812 |
| HSPA1B    | 26.5309834 | 1.18191487 | 0.00180336 | 0.03290576 |
| SEPT8     | 1137.69339 | 0.62694688 | 0.00181088 | 0.03300864 |
| CACNB1    | 133.149456 | -0.8207764 | 0.00181454 | 0.03304108 |
| HEPACAM   | 11.6462748 | -1.6023091 | 0.00182669 | 0.03322796 |
| BLNK      | 180.167666 | 0.96387367 | 0.00183362 | 0.03331959 |
| SH2B2     | 14.0801    | -1.1285235 | 0.00183908 | 0.03338433 |
| POTEF     | 14.4147676 | -1.2812829 | 0.00185527 | 0.03364351 |
| ACLY      | 2312.12286 | -0.4442432 | 0.00185858 | 0.0336689  |
| COX10     | 200.880261 | -0.5886137 | 0.00186888 | 0.03382056 |
| NAIP      | 342.604339 | 0.56539673 | 0.0018762  | 0.0338834  |
| NME2      | 275.363198 | -0.7516044 | 0.00187507 | 0.0338834  |
| ZNF487    | 45.952682  | 0.93747786 | 0.00187884 | 0.03389626 |
| STXBPL5L  | 6.04142302 | -1.5921461 | 0.00189921 | 0.0342285  |
| HIVEP3    | 308.002256 | 1.14817907 | 0.00191595 | 0.03447709 |
| ZFAND5    | 2959.34573 | 0.70605194 | 0.00191692 | 0.03447709 |
| CDCA7     | 49.9616936 | -1.5080131 | 0.00191947 | 0.03448779 |
| LPCAT4    | 148.033614 | -0.8527451 | 0.00192152 | 0.03448929 |
| MSANTD4   | 460.869546 | -0.5000446 | 0.00192993 | 0.03460488 |
| SNORA80A  | 18.5348982 | 1.35545634 | 0.00194518 | 0.03484288 |
| MARCH9    | 157.033649 | -0.5012808 | 0.00194991 | 0.03489204 |
| FN3K      | 144.27091  | -0.8471207 | 0.00196042 | 0.03504455 |
| SET       | 4061.29411 | -0.4232377 | 0.00196251 | 0.03504618 |
| DCT       | 7.72263524 | 1.1631477  | 0.00196959 | 0.03513692 |
| ATE1-AS1  | 11.723148  | 1.42524186 | 0.00197748 | 0.03522447 |
| CPSF7     | 1418.5355  | -0.3430789 | 0.00198603 | 0.03522447 |
| GTSE1     | 28.374082  | -1.11227   | 0.00198651 | 0.03522447 |
| OTUB1     | 597.013392 | -0.4216225 | 0.00197944 | 0.03522447 |
| POLR2L    | 971.293497 | -0.6097729 | 0.00198179 | 0.03522447 |
| ZNF562    | 966.410488 | 0.38347089 | 0.00198595 | 0.03522447 |
| TUBG1     | 396.984995 | -0.61993   | 0.00198895 | 0.0352322  |
| MED14OS   | 2.76064576 | 1.27760341 | 0.00199292 | 0.03526714 |
| COL9A2    | 60.1715321 | 1.37902475 | 0.00199676 | 0.03529954 |
| CLUH      | 830.662991 | -0.5569171 | 0.00201055 | 0.03533018 |
| E2F2      | 24.2538067 | -1.1316136 | 0.00200372 | 0.03533018 |

|           |            |            |            |            |
|-----------|------------|------------|------------|------------|
| LINC00417 | 17.5959255 | 1.54183858 | 0.00200925 | 0.03533018 |
| NKX6-1    | 13.459662  | -1.5279959 | 0.00200585 | 0.03533018 |
| RBP4      | 95.5762866 | 1.56781645 | 0.00200818 | 0.03533018 |
| SRP68     | 993.51777  | -0.5754279 | 0.00200782 | 0.03533018 |
| EPHA1     | 4.18581159 | 1.47186554 | 0.0020137  | 0.03535032 |
| ZDHHC5    | 1668.79698 | -0.4807567 | 0.00201912 | 0.03541007 |
| RASL10A   | 4.74617228 | -1.3825379 | 0.0020291  | 0.03554961 |
| DKK2      | 2029.09132 | -1.5824035 | 0.00204347 | 0.03576586 |
| VENTX     | 119.306822 | 1.25417094 | 0.00204652 | 0.03578357 |
| GAB2      | 846.708939 | 0.72188002 | 0.00205329 | 0.03583079 |
| LOC729683 | 14.8042248 | 1.00317565 | 0.00205165 | 0.03583079 |
| PABPC1    | 7118.61875 | -0.6000677 | 0.00206292 | 0.03596307 |
| HGF       | 85.1895756 | 1.20903111 | 0.00206715 | 0.03600122 |
| NRTN      | 4.70017568 | -1.5330548 | 0.00207016 | 0.03601793 |
| ARMC2     | 100.804226 | 0.89771589 | 0.00207773 | 0.03611393 |
| BBOX1     | 1.32875708 | 1.47424627 | 0.0020895  | 0.03617553 |
| CPB2-AS1  | 10.1533558 | 1.24357769 | 0.00208891 | 0.03617553 |
| FBXO46    | 232.19465  | -0.6799195 | 0.00208585 | 0.03617553 |
| NUDCD2    | 157.229304 | 0.47976856 | 0.00208634 | 0.03617553 |
| KIAA1467  | 318.515922 | 0.78730169 | 0.00209564 | 0.0362462  |
| ADRA1A    | 23.3400376 | -1.5725806 | 0.00211007 | 0.03642409 |
| KIAA1217  | 3891.30038 | -0.6688891 | 0.00210893 | 0.03642409 |
| SUMO4     | 29.853724  | 0.69258664 | 0.00211782 | 0.03652207 |
| CDADC1    | 128.536663 | 0.62484795 | 0.00212216 | 0.03656095 |
| FAM168B   | 2472.40142 | -0.3397249 | 0.0021272  | 0.03661202 |
| IFT20     | 202.38328  | 0.46678695 | 0.00213491 | 0.03670884 |
| OMA1      | 213.304179 | 0.58725373 | 0.00213705 | 0.03670974 |
| HIATL2    | 58.2061199 | -0.5722018 | 0.00214016 | 0.03672719 |
| SENP7     | 839.16531  | 0.39039896 | 0.00214602 | 0.03679184 |
| GUCA1B    | 21.2483771 | 0.92965781 | 0.00215135 | 0.03684741 |
| C19orf48  | 321.40122  | -0.5969687 | 0.00215954 | 0.03689266 |
| KMT2B     | 1215.85003 | -0.4227335 | 0.00216238 | 0.03689266 |
| SLC25A25  | 424.906223 | 0.91456723 | 0.00215793 | 0.03689266 |
| STOML3    | 6.22218203 | 1.56654986 | 0.00216104 | 0.03689266 |
| ABLIM2    | 34.841937  | -1.0983886 | 0.00217661 | 0.03702762 |
| PAQR6     | 107.875763 | -1.2011282 | 0.00217488 | 0.03702762 |
| TMEM220-A | 2.33246163 | 1.45440761 | 0.00217543 | 0.03702762 |
| TBPL1     | 108.963802 | 0.65532732 | 0.00217924 | 0.0370365  |
| MCOLN3    | 11.9449639 | 1.34677638 | 0.00218388 | 0.03706046 |
| PHGDH     | 288.313457 | -1.3693578 | 0.00218486 | 0.03706046 |
| IRF5      | 195.073432 | 0.96191193 | 0.00219238 | 0.03715216 |
| EMR3      | 4.58420212 | 1.50812427 | 0.00219807 | 0.03721277 |
| TSPO      | 175.506638 | 0.89736821 | 0.00220179 | 0.03723997 |
| HPS5      | 773.559247 | 0.75221238 | 0.00220843 | 0.03731636 |
| ADRBK2    | 336.204353 | 0.82573534 | 0.00223142 | 0.03765758 |
| ASCL4     | 1.99346926 | 1.57136932 | 0.0022371  | 0.03765758 |
| PFKM      | 2628.61986 | -0.5291315 | 0.00223753 | 0.03765758 |
| TNFRSF11B | 734.274616 | -1.4402414 | 0.00224324 | 0.03765758 |
| TP73      | 11.8422271 | -1.327318  | 0.00224254 | 0.03765758 |
| ZBTB45    | 133.211891 | -0.5105278 | 0.00223461 | 0.03765758 |

|            |            |            |            |            |
|------------|------------|------------|------------|------------|
| ZNF853     | 251.337883 | -0.5858667 | 0.00224361 | 0.03765758 |
| ZFPM1      | 119.47177  | -0.7265266 | 0.00225756 | 0.03785551 |
| KCNJ10     | 20.157932  | -1.5691187 | 0.00225999 | 0.03786018 |
| CCRL2      | 13.6468113 | 0.99694398 | 0.00226351 | 0.03788305 |
| RAB6C      | 9.68137603 | -1.1668227 | 0.0022662  | 0.03789204 |
| MAFA       | 7.74290844 | -1.5648252 | 0.00227217 | 0.03793089 |
| RELL2      | 72.8701386 | -1.0015033 | 0.00227283 | 0.03793089 |
| NDUFB9     | 473.667022 | -0.6598206 | 0.00228907 | 0.03814845 |
| SERPINE2   | 318.802024 | -1.2186833 | 0.00229021 | 0.03814845 |
| SDHC       | 796.671851 | -0.5077297 | 0.0022958  | 0.03816937 |
| ZNF18      | 203.783687 | 0.48114025 | 0.00229365 | 0.03816937 |
| RAP2C-AS1  | 67.3901528 | 0.76444883 | 0.00229988 | 0.03820098 |
| TFPI2      | 20.1743434 | -1.5604717 | 0.00231085 | 0.03834703 |
| A2ML1      | 2.26219225 | 1.41522222 | 0.00231725 | 0.03841702 |
| SLFNL1     | 4.90327391 | 1.28875559 | 0.00232816 | 0.03856151 |
| UNC80      | 143.819261 | -1.3693423 | 0.00234929 | 0.03887496 |
| RPP30      | 241.904886 | 0.43526029 | 0.00235515 | 0.03893518 |
| CNTNAP2    | 12.8693127 | -1.3521869 | 0.00236992 | 0.03914254 |
| SLC35C1    | 487.809954 | -0.7704194 | 0.00237884 | 0.03925316 |
| PPFIBP2    | 327.098326 | 0.92320471 | 0.0023832  | 0.03928816 |
| LINC00673  | 6.0517173  | -1.5058857 | 0.00238858 | 0.03930317 |
| NOMO2      | 282.524282 | -0.6946329 | 0.00238675 | 0.03930317 |
| FANCI      | 296.718394 | -0.9267192 | 0.00239454 | 0.03936444 |
| LOC1019271 | 10.7268381 | 1.15520612 | 0.00241663 | 0.0396836  |
| PQLC3      | 320.153179 | 0.66581295 | 0.00241847 | 0.0396836  |
| PTGES      | 190.655792 | -1.2462995 | 0.00242278 | 0.03971741 |
| APLP1      | 320.713709 | -1.125309  | 0.00243001 | 0.03979869 |
| CELF5      | 5.5510553  | -1.4457848 | 0.00243735 | 0.03988192 |
| AFAP1-AS1  | 94.5466343 | -1.5414457 | 0.00245087 | 0.03991745 |
| NAA60      | 706.968921 | -0.4986945 | 0.00244671 | 0.03991745 |
| SHC1       | 2717.67389 | -0.4997136 | 0.00244788 | 0.03991745 |
| TNFSF8     | 106.030012 | 1.06223647 | 0.00244258 | 0.03991745 |
| UBQLN1     | 2043.47035 | -0.4371849 | 0.00245024 | 0.03991745 |
| VSIG10     | 296.606667 | -0.6783658 | 0.00245653 | 0.0399726  |
| CXCR2      | 15.2690353 | 1.01056637 | 0.0024615  | 0.039985   |
| KLHL8      | 304.870586 | 0.50129252 | 0.00246184 | 0.039985   |
| GPD1L      | 584.581894 | 0.85992492 | 0.00246766 | 0.04004255 |
| FAM86C1    | 52.9203552 | -0.6274075 | 0.002476   | 0.04012838 |
| GRB14      | 52.2663526 | -1.5290012 | 0.00247979 | 0.04012838 |
| MANEA-AS1  | 32.9991073 | 0.79580314 | 0.00247841 | 0.04012838 |
| SLC25A44   | 506.748974 | -0.4910701 | 0.00248336 | 0.04014915 |
| FOXL2      | 3.1115344  | -1.4534435 | 0.0024929  | 0.04019257 |
| MUC1       | 232.246386 | -0.9537554 | 0.00249157 | 0.04019257 |
| SCRT1      | 1.46335665 | -1.532698  | 0.00249195 | 0.04019257 |
| KCNG2      | 7.50116547 | -1.5281966 | 0.00250127 | 0.04029064 |
| ACY1       | 18.50459   | -0.9279266 | 0.00250595 | 0.04029227 |
| C1orf116   | 3.76003512 | -1.3212519 | 0.00250517 | 0.04029227 |
| PTPRR      | 4.58121532 | 1.45856998 | 0.00250915 | 0.0403068  |
| TSEN54     | 149.370835 | -0.8723183 | 0.00252675 | 0.04055243 |
| ACTR6      | 177.315103 | 0.4450235  | 0.00252921 | 0.04055493 |

|            |            |            |            |            |
|------------|------------|------------|------------|------------|
| PRR18      | 2.93358126 | -1.5519889 | 0.00253398 | 0.04059437 |
| HECA       | 1236.70348 | 0.68125738 | 0.00254259 | 0.04065834 |
| NUDT8      | 35.9370935 | -0.889074  | 0.00254037 | 0.04065834 |
| RPRM       | 65.4858054 | -1.5391229 | 0.00255341 | 0.04079421 |
| TBX3       | 25.5188493 | -1.343745  | 0.00255579 | 0.04079527 |
| HIST1H1B   | 333.185146 | -1.0023404 | 0.00257739 | 0.04110216 |
| LINC00632  | 2.31269935 | -1.5418253 | 0.00258416 | 0.04110216 |
| LOC1019270 | 31.4362329 | 1.35249027 | 0.00258686 | 0.04110216 |
| SKINTL     | 8.24894046 | 1.20498488 | 0.00258945 | 0.04110216 |
| TBX1       | 16.449054  | -1.4458652 | 0.00258347 | 0.04110216 |
| TBX21      | 3.86032949 | 1.33521002 | 0.00258544 | 0.04110216 |
| UBE2S      | 193.173655 | -0.8299099 | 0.00259138 | 0.04110216 |
| NRIP3      | 18.8807186 | 1.40565546 | 0.00260763 | 0.04119969 |
| TAF6       | 485.852839 | -0.4266817 | 0.00260642 | 0.04119969 |
| TMC6       | 756.238212 | -0.8524716 | 0.00260271 | 0.04119969 |
| TTYH3      | 1108.718   | -0.785025  | 0.00260924 | 0.04119969 |
| ZNF142     | 732.91311  | -0.3777138 | 0.00260226 | 0.04119969 |
| FANCC      | 243.432517 | -0.7837937 | 0.00261774 | 0.04129698 |
| FGFR1OP2   | 529.295339 | 0.38939645 | 0.00262594 | 0.04138922 |
| ZNF598     | 423.319377 | -0.6276844 | 0.00263096 | 0.04143108 |
| CNNM3      | 401.325258 | -0.4693776 | 0.00263917 | 0.04152328 |
| DDX58      | 449.713084 | 0.59916226 | 0.00264763 | 0.0416191  |
| AIM2       | 7.18798715 | 1.42934806 | 0.00265761 | 0.04170152 |
| BRCA2      | 230.878727 | -0.9256505 | 0.00265727 | 0.04170152 |
| SF1        | 2374.387   | -0.4394398 | 0.00267982 | 0.04197502 |
| SPNS3      | 16.6124083 | 1.43453784 | 0.00267759 | 0.04197502 |
| LMBR1      | 1097.7648  | -0.5616923 | 0.00268823 | 0.04206939 |
| ACSBG2     | 11.0410363 | 1.5357455  | 0.00269961 | 0.04217245 |
| CREG1      | 1214.91133 | 0.39598423 | 0.00269743 | 0.04217245 |
| ATP8B4     | 345.131251 | 0.99779798 | 0.00271142 | 0.04231931 |
| POLK       | 901.368214 | 0.3202678  | 0.00271825 | 0.0423883  |
| MRPL38     | 396.703635 | -0.4635566 | 0.00272325 | 0.04242868 |
| PPAN       | 26.6682761 | 0.76359407 | 0.0027335  | 0.04251306 |
| SMPD4      | 723.131715 | -0.4070775 | 0.00273146 | 0.04251306 |
| KRT14      | 33.2496729 | -1.5362673 | 0.00274135 | 0.04259745 |
| CNOT1      | 4255.0343  | -0.4009375 | 0.00274661 | 0.04264147 |
| CNIH3      | 20.1935479 | 1.07820898 | 0.00275224 | 0.04269131 |
| ZCCHC10    | 158.21385  | 0.49733118 | 0.00277864 | 0.04306278 |
| ASPRV1     | 40.3801062 | 1.05175014 | 0.00278482 | 0.0430827  |
| TLCD1      | 14.3662054 | -1.1793021 | 0.00278445 | 0.0430827  |
| C11orf35   | 45.0197732 | -0.7094954 | 0.0027958  | 0.04310096 |
| FAM229B    | 238.940116 | 0.87006295 | 0.00279043 | 0.04310096 |
| MRPL41     | 326.905432 | -0.6257164 | 0.00279513 | 0.04310096 |
| SCAMP3     | 703.975153 | -0.4934911 | 0.00279389 | 0.04310096 |
| NAGPA      | 106.707259 | 0.34875874 | 0.00280667 | 0.04323052 |
| SHCBP1     | 78.7332453 | -1.0013193 | 0.00281374 | 0.04330158 |
| SPATA41    | 16.6038716 | -0.8870349 | 0.00282935 | 0.04350367 |
| ESRRA      | 369.902958 | -0.7247024 | 0.00283353 | 0.04352992 |
| RUNX3      | 53.4176828 | 1.15928662 | 0.00284014 | 0.04359338 |
| FAM106CP   | 33.7272346 | -1.5032595 | 0.00286028 | 0.04379053 |

|            |            |            |            |            |
|------------|------------|------------|------------|------------|
| GPATCH8    | 2211.86536 | -0.4128738 | 0.00285688 | 0.04379053 |
| USP53      | 4313.66273 | 0.78816581 | 0.00286045 | 0.04379053 |
| CPO        | 8.30705827 | 1.20774088 | 0.002874   | 0.04392154 |
| MINOS1P1   | 166.634016 | 0.72689329 | 0.00287269 | 0.04392154 |
| WEE2-AS1   | 13.6623406 | 0.94514495 | 0.00288495 | 0.0440506  |
| ASIC3      | 43.1203869 | -0.9633623 | 0.00290188 | 0.04427065 |
| PEX5L      | 59.8901658 | -1.4467256 | 0.00291518 | 0.04443498 |
| ATP7A      | 707.595756 | 0.3641526  | 0.00292711 | 0.04453973 |
| SPRY1      | 624.173493 | 1.01666815 | 0.00292631 | 0.04453973 |
| DLL1       | 80.4396858 | 1.35367564 | 0.0029332  | 0.0445552  |
| SOX12      | 233.512548 | -0.854358  | 0.00293279 | 0.0445552  |
| CETN4P     | 1.54058385 | 1.5101748  | 0.00294511 | 0.04469763 |
| LOC728819  | 5.08743447 | -1.4433427 | 0.00296737 | 0.04499658 |
| DNAJB1     | 1740.88621 | 0.71985092 | 0.00298027 | 0.04515332 |
| ACSM5      | 40.5575885 | 1.16505162 | 0.00298991 | 0.04526034 |
| FZD2       | 963.904521 | -0.6206861 | 0.00299265 | 0.04526281 |
| C8orf82    | 177.730391 | -0.6554342 | 0.00299704 | 0.04529028 |
| TTYH1      | 10.6865586 | -1.5046439 | 0.00300111 | 0.04531293 |
| FRMPD4     | 2.15636193 | -1.5252861 | 0.00300602 | 0.04534814 |
| NRG4       | 51.5245271 | -1.4383975 | 0.0030115  | 0.0453919  |
| CALY       | 9.79209512 | -1.5086657 | 0.00301787 | 0.04540999 |
| PTPN22     | 46.8368537 | 1.11899181 | 0.00301778 | 0.04540999 |
| CCND1      | 21355.0724 | -0.9160399 | 0.00302843 | 0.04552993 |
| LOC1019276 | 4.95133738 | 1.5054633  | 0.00303494 | 0.04558889 |
| CAPN15     | 521.236132 | -0.6302792 | 0.00303993 | 0.04562495 |
| TRIM46     | 55.9294482 | -1.3384695 | 0.00304394 | 0.0456461  |
| ANKRD39    | 72.6868642 | -0.5138767 | 0.00306625 | 0.04573696 |
| EPG5       | 1597.81399 | 0.67103874 | 0.00305493 | 0.04573696 |
| GPR98      | 23.424167  | -1.4100518 | 0.00306311 | 0.04573696 |
| HSPA12A    | 379.714745 | 1.27385326 | 0.00306661 | 0.04573696 |
| LOC283038  | 5.43118841 | -1.4127541 | 0.0030682  | 0.04573696 |
| PTPRC      | 971.915685 | 0.92983124 | 0.00305896 | 0.04573696 |
| TRPC1      | 603.414684 | 0.63147171 | 0.00306675 | 0.04573696 |
| PLA1A      | 5.77362796 | 1.2331817  | 0.00307923 | 0.04586261 |
| ARHGAP11B  | 30.9314246 | -1.070385  | 0.00309318 | 0.04603126 |
| LOC1019272 | 9.73653821 | 1.48128226 | 0.00310189 | 0.04608291 |
| UBA7       | 655.700195 | 0.78621443 | 0.00310161 | 0.04608291 |
| CST7       | 11.8065323 | 1.32276445 | 0.00312116 | 0.04633019 |
| AQP1       | 1810.00775 | 1.44452043 | 0.00314321 | 0.04648228 |
| DCAF7      | 2481.52292 | -0.4611992 | 0.00313894 | 0.04648228 |
| RNF11      | 1581.43529 | 0.62145455 | 0.00314462 | 0.04648228 |
| SLC30A3    | 17.8307891 | 1.51676004 | 0.00314445 | 0.04648228 |
| ZBED8      | 190.258235 | 0.60551393 | 0.0031362  | 0.04648228 |
| ANKRD20A8  | 52.1625303 | -1.3376395 | 0.00314779 | 0.04649004 |
| KIF23      | 362.283681 | -1.0644221 | 0.00316352 | 0.04668319 |
| ARID5B     | 1255.1713  | 1.1487315  | 0.00317844 | 0.04675633 |
| HERC2      | 3874.27986 | -0.2988698 | 0.00317533 | 0.04675633 |
| IPCEF1     | 85.4745127 | 1.08484079 | 0.00317911 | 0.04675633 |
| SAP130     | 472.205882 | -0.4073437 | 0.00317682 | 0.04675633 |
| ITGB3      | 115.296176 | 1.04267228 | 0.00318391 | 0.04678518 |



|            |            |            |            |            |
|------------|------------|------------|------------|------------|
| NELFB      | 568.186493 | -0.3349292 | 0.00318639 | 0.04678518 |
| NEB        | 586.314523 | 1.20512144 | 0.00319691 | 0.04690041 |
| SHROOM3    | 244.47223  | 1.31128813 | 0.00320346 | 0.04695738 |
| IKZF3      | 61.0426669 | 1.14033402 | 0.00321014 | 0.04701606 |
| ACO2       | 1351.79574 | -0.6646326 | 0.00321501 | 0.04704831 |
| BLOC1S3    | 157.965236 | -0.5164942 | 0.00321926 | 0.0470713  |
| HIF3A      | 1603.4172  | -1.1423435 | 0.00323248 | 0.04722536 |
| FAM13A-AS1 | 94.0139253 | 0.72120814 | 0.00323642 | 0.04724365 |
| THEMIS     | 14.2077361 | 1.16494318 | 0.00324265 | 0.04729544 |
| AEBP1      | 4151.15313 | 1.29254512 | 0.00325749 | 0.04739388 |
| CYC1       | 609.978737 | -0.565131  | 0.00325513 | 0.04739388 |
| MRPL14     | 147.599837 | 0.45953914 | 0.00325582 | 0.04739388 |
| WDR11-AS1  | 5.53914016 | 1.26910206 | 0.00326337 | 0.04744027 |
| SOX11      | 328.616986 | -1.5071619 | 0.0032672  | 0.04745664 |
| AMH        | 92.6189154 | -1.3987401 | 0.00327645 | 0.04755171 |
| CYP2D7P    | 18.4793639 | 0.77439569 | 0.00328765 | 0.04765386 |
| ZNF438     | 187.129874 | 0.60317536 | 0.0032889  | 0.04765386 |
| CD244      | 5.91877599 | 1.32160104 | 0.00330233 | 0.04778337 |
| CUX1       | 3267.02176 | -0.5227282 | 0.00330786 | 0.04778337 |
| ORC6       | 37.339782  | -1.0721834 | 0.00330613 | 0.04778337 |
| SLC37A4    | 228.659393 | -0.4484349 | 0.00330871 | 0.04778337 |
| FIZ1       | 139.399511 | -0.6305609 | 0.00331223 | 0.04779502 |
| STON1      | 130.432274 | 0.83506459 | 0.00332444 | 0.04793187 |
| FUBP3      | 960.913236 | -0.2722478 | 0.0033305  | 0.04794063 |
| RGP1       | 422.969312 | -0.5132597 | 0.00332826 | 0.04794063 |
| HTRA1      | 1337.63966 | 0.91616869 | 0.00334278 | 0.04807809 |
| EHD1       | 4132.50246 | -0.7875156 | 0.00334992 | 0.04813384 |
| HMP19      | 2.75663015 | -1.5068792 | 0.00335487 | 0.04813384 |
| LSMEM1     | 16.3966629 | 0.82434466 | 0.00335358 | 0.04813384 |
| FAM135A    | 517.102822 | 0.50986503 | 0.00337756 | 0.04822348 |
| LAMC1      | 7265.36256 | -0.6091379 | 0.00337371 | 0.04822348 |
| MX1        | 991.154475 | 0.59723847 | 0.00337286 | 0.04822348 |
| PSAT1      | 214.051277 | -1.1484501 | 0.00336393 | 0.04822348 |
| RPUSD3     | 145.896273 | -0.5005441 | 0.00337714 | 0.04822348 |
| SHMT2      | 1069.43287 | -0.7291454 | 0.00337009 | 0.04822348 |
| DPY19L1P1  | 43.5684963 | 0.88693367 | 0.00338499 | 0.04825306 |
| INTS6-AS1  | 27.2466626 | 0.60810292 | 0.00338512 | 0.04825306 |
| LOC728730  | 45.1218994 | 0.75325841 | 0.00339456 | 0.04834847 |
| TNXB       | 12.5352774 | -1.2267921 | 0.00339961 | 0.04838113 |
| CD226      | 18.3975941 | 0.95740901 | 0.0034048  | 0.04841583 |
| ERBB2IP    | 3192.35647 | 0.29779565 | 0.00340924 | 0.04843981 |
| TDRKH      | 120.46616  | -0.7607495 | 0.00342438 | 0.04857655 |
| TXNDC15    | 957.192443 | 0.46936303 | 0.00342275 | 0.04857655 |
| SAT1       | 2458.71124 | 0.60806402 | 0.00343542 | 0.04869384 |
| PPP1R1C    | 6.29176205 | -1.4651195 | 0.00344117 | 0.04873611 |
| RTN4R      | 61.5644347 | -1.2904459 | 0.00345083 | 0.04883351 |
| CSMD2      | 37.3880403 | -1.3468282 | 0.00346178 | 0.04894907 |
| ARHGAP11A  | 207.151778 | -0.9486742 | 0.00346886 | 0.04897054 |
| SLC6A17    | 28.3566681 | 1.45261771 | 0.00346769 | 0.04897054 |
| C1QL1      | 129.455126 | -1.192896  | 0.00347296 | 0.04898913 |

|            |            |            |            |            |
|------------|------------|------------|------------|------------|
| P2RY14     | 56.5488825 | 1.42817758 | 0.00347834 | 0.04902571 |
| RANBP10    | 485.878456 | -0.4580209 | 0.00348788 | 0.04908147 |
| SURF2      | 76.3025261 | -0.6746234 | 0.0034851  | 0.04908147 |
| LMNB2      | 721.672312 | -0.6396509 | 0.00351361 | 0.04919182 |
| MATN2      | 713.979172 | 1.33846953 | 0.00352369 | 0.04919182 |
| NDUFS1     | 1557.43859 | -0.4893952 | 0.00350017 | 0.04919182 |
| NUMBL      | 847.965807 | -0.5791738 | 0.00350289 | 0.04919182 |
| PSMD10     | 342.652407 | 0.34503791 | 0.0035231  | 0.04919182 |
| RAP1GAP2   | 397.827078 | -1.0095698 | 0.00350591 | 0.04919182 |
| SNORA71C   | 7.95084917 | -1.2633236 | 0.0035194  | 0.04919182 |
| SRSF10     | 77.4348237 | 0.5612431  | 0.00351677 | 0.04919182 |
| THUMPD3    | 637.728991 | -0.4953759 | 0.00352034 | 0.04919182 |
| TNIK       | 203.637933 | 1.20465955 | 0.00351484 | 0.04919182 |
| RPL23AP32  | 115.135701 | 0.89084066 | 0.00353525 | 0.04931406 |
| TRAF3IP3   | 47.3773251 | 1.08864812 | 0.00354706 | 0.04943964 |
| LCK        | 10.8696077 | 1.11586237 | 0.0035597  | 0.04957646 |
| ZMYM6NB    | 148.180609 | 0.62462535 | 0.00356321 | 0.04958619 |
| EIF2AK1    | 1800.25327 | -0.3864185 | 0.00356821 | 0.04961639 |
| C9orf16    | 360.109414 | -0.6435515 | 0.00358119 | 0.04967906 |
| FBXW5      | 859.404595 | -0.3827278 | 0.00358098 | 0.04967906 |
| MTERF      | 174.552108 | 0.45231153 | 0.00357683 | 0.04967906 |
| WNT10A     | 10.885127  | -1.4135691 | 0.00358691 | 0.04971931 |
| SIN3A      | 1755.37184 | -0.5080286 | 0.00359894 | 0.0498467  |
| LOC653602  | 11.1288635 | -1.2910275 | 0.00362378 | 0.05015126 |
| MATK       | 48.3858419 | -1.3876817 | 0.00363388 | 0.05025154 |
| NMRAL1     | 274.484908 | -0.520026  | 0.00364094 | 0.05030955 |
| GAL3ST3    | 8.21105171 | -1.418312  | 0.00365876 | 0.05051619 |
| TNNT2      | 1650.11178 | -1.1280174 | 0.00366174 | 0.05051759 |
| SLC22A18   | 215.050917 | -0.6036876 | 0.00366811 | 0.05056584 |
| LOC374443  | 291.380026 | 0.62190905 | 0.00368166 | 0.05071293 |
| C19orf68   | 49.4224164 | -0.6043642 | 0.00370941 | 0.05103679 |
| PDCD1      | 6.33562299 | 1.40882393 | 0.00371098 | 0.05103679 |
| ABCC11     | 4.45788913 | -1.1799602 | 0.0037244  | 0.0511451  |
| GPAA1      | 950.589618 | -0.4759048 | 0.00372757 | 0.0511451  |
| THAP2      | 74.9523733 | 0.59111347 | 0.00372634 | 0.0511451  |
| STK32A     | 173.689622 | 1.4197198  | 0.00373431 | 0.05119762 |
| P2RX7      | 213.792652 | 0.91472939 | 0.00373735 | 0.0511993  |
| FAM171A2   | 208.431893 | -0.6064887 | 0.00374405 | 0.05125117 |
| CASP2      | 568.817525 | -0.470954  | 0.00375085 | 0.05130444 |
| RNGTT      | 394.952804 | 0.56603334 | 0.0037557  | 0.05133084 |
| C19orf84   | 2.15855958 | -1.4891186 | 0.00376768 | 0.05145269 |
| JPH2       | 80.6487556 | -1.1759404 | 0.00377632 | 0.05145269 |
| SMC2       | 483.678492 | -0.4999722 | 0.00377202 | 0.05145269 |
| TMSB4X     | 5949.29007 | 0.49160454 | 0.0037761  | 0.05145269 |
| ATIC       | 691.229388 | -0.7748901 | 0.00378178 | 0.0514873  |
| GLS        | 2076.50844 | 0.75206033 | 0.00378542 | 0.05149197 |
| PIK3IP1    | 553.269914 | 0.93186551 | 0.00378798 | 0.05149197 |
| PSTPIP2    | 137.818774 | 0.80322356 | 0.00381008 | 0.05175231 |
| MORN1      | 51.3371211 | 0.84891093 | 0.00381838 | 0.0518096  |
| PRKAG2-AS1 | 10.4523365 | 1.20140471 | 0.00382018 | 0.0518096  |

|            |            |            |            |            |
|------------|------------|------------|------------|------------|
| BRI3BP     | 128.277167 | -0.6591681 | 0.00382376 | 0.05181807 |
| COL24A1    | 32.4034502 | 1.10207995 | 0.00382904 | 0.05184968 |
| ROGDI      | 331.252634 | -0.6941741 | 0.0038789  | 0.05248456 |
| RPS29      | 1123.54262 | 0.67267207 | 0.00388458 | 0.05252096 |
| STK16      | 224.112595 | -0.4298485 | 0.00388863 | 0.05253527 |
| ATXN2L     | 1553.80302 | -0.4820157 | 0.00389738 | 0.05261312 |
| CHAF1A     | 175.098804 | -0.7252597 | 0.00390663 | 0.0526169  |
| ZNF394     | 312.013309 | 0.33759042 | 0.00390434 | 0.0526169  |
| ZNF699     | 89.2600049 | 0.64630416 | 0.00390655 | 0.0526169  |
| EZH1       | 972.572201 | 0.59210823 | 0.00391505 | 0.05268992 |
| ZFYVE9     | 1015.76131 | 0.658123   | 0.00391816 | 0.05269142 |
| CDH23      | 2780.14431 | 1.30474793 | 0.00392325 | 0.05271959 |
| DBI        | 489.686461 | -0.5077332 | 0.00392883 | 0.0527543  |
| SFRP2      | 26626.5836 | 1.26512037 | 0.00393184 | 0.05275438 |
| THUMPD1    | 1149.73997 | 0.38272192 | 0.00395106 | 0.05297185 |
| ENDOG      | 100.884023 | -0.857078  | 0.00396906 | 0.05317268 |
| CRMP1      | 287.447831 | -1.2687385 | 0.00397445 | 0.05318157 |
| TTC37      | 2229.48872 | 0.32799035 | 0.00397577 | 0.05318157 |
| KIAA0895L  | 452.122542 | -0.6828871 | 0.00399117 | 0.05324371 |
| LOC1019282 | 6.07772508 | -1.4650541 | 0.00399252 | 0.05324371 |
| SRRT       | 1005.28008 | -0.3741494 | 0.00398759 | 0.05324371 |
| ZNF683     | 2.13867688 | 1.42196789 | 0.00399159 | 0.05324371 |
| ACSL1      | 942.53583  | 0.82954358 | 0.0039999  | 0.05330163 |
| KIF2C      | 32.1922651 | -0.9428833 | 0.00400433 | 0.05332037 |
| NAV3       | 172.516836 | 1.4236052  | 0.00401639 | 0.0534405  |
| CCDC3      | 499.56544  | -1.3959137 | 0.00402359 | 0.05345538 |
| ZNF285     | 77.9659753 | 0.64521124 | 0.00402296 | 0.05345538 |
| PHB        | 1189.45674 | -0.4170433 | 0.00404127 | 0.0536497  |
| ZDHHC24    | 126.254234 | -0.5541912 | 0.00404435 | 0.05365011 |
| RCBTB2     | 854.64281  | 0.53727152 | 0.00405581 | 0.05372111 |
| SFRP4      | 2848.9995  | 1.4552105  | 0.00405488 | 0.05372111 |
| PNRC1      | 2685.09502 | 0.67313357 | 0.00406938 | 0.05380039 |
| RAD51AP1   | 52.4767029 | -0.8736393 | 0.00406625 | 0.05380039 |
| VGLL4      | 2794.24916 | -0.9835649 | 0.00407097 | 0.05380039 |
| CAMLG      | 455.358184 | 0.50583234 | 0.00408288 | 0.05391727 |
| LINC00630  | 98.2719017 | 0.41174733 | 0.0040914  | 0.05398932 |
| ZIC2       | 2853.9414  | -0.6692618 | 0.00409591 | 0.05400829 |
| TMED1      | 240.428736 | 0.4338828  | 0.00410192 | 0.05404697 |
| C11orf21   | 11.6607747 | 1.27624885 | 0.00411116 | 0.05408932 |
| KIAA0100   | 5252.63161 | -0.3150958 | 0.00411128 | 0.05408932 |
| SLC19A1    | 90.9028422 | -0.8676169 | 0.00412829 | 0.0542725  |
| BTBD8      | 22.4478222 | 0.98328613 | 0.00415344 | 0.05456235 |
| BOP1       | 182.634935 | -0.5392051 | 0.00416746 | 0.05469173 |
| STAT5A     | 469.596612 | 0.50226888 | 0.00416951 | 0.05469173 |
| ASPHD1     | 3.2033583  | -1.4483584 | 0.004198   | 0.05502447 |
| FIG4       | 251.917675 | 0.62762689 | 0.00420308 | 0.05504998 |
| CLEC17A    | 10.7647456 | 1.37964341 | 0.00421681 | 0.05518873 |
| ALDOA      | 10177.4213 | -0.6731153 | 0.0042219  | 0.05521379 |
| GZMH       | 5.45880893 | 1.34560473 | 0.00422646 | 0.05521379 |
| HIST1H2BM  | 57.4956526 | -1.029034  | 0.00422814 | 0.05521379 |

|           |            |            |            |            |
|-----------|------------|------------|------------|------------|
| CDKAL1    | 341.026633 | 0.49839512 | 0.00425792 | 0.0555202  |
| ZNF345    | 131.176292 | 0.49427418 | 0.00425787 | 0.0555202  |
| OSBPL8    | 1816.74921 | 0.42560287 | 0.00426997 | 0.05563615 |
| CH25H     | 46.7467649 | 1.20413206 | 0.00427921 | 0.05571521 |
| ANKRD13B  | 584.243642 | -0.9982559 | 0.0043042  | 0.05596396 |
| RPL13A    | 1657.98562 | 0.53817452 | 0.00430468 | 0.05596396 |
| NME8      | 4.78623948 | 1.30355961 | 0.00432819 | 0.05622814 |
| ADAT2     | 99.2355043 | 0.72830565 | 0.00433678 | 0.05628406 |
| CSF2RB    | 121.027558 | 0.86490144 | 0.0043389  | 0.05628406 |
| CYTH2     | 686.297052 | -0.5342585 | 0.00434713 | 0.05634925 |
| FAM110A   | 53.9211951 | -0.6002888 | 0.00436192 | 0.05649944 |
| SLC26A7   | 279.090127 | -1.4341303 | 0.00438103 | 0.05670521 |
| CIZ1      | 1028.07374 | -0.3633949 | 0.00438915 | 0.05676855 |
| APOL3     | 162.018703 | 0.85877188 | 0.00442718 | 0.05691542 |
| CEP135    | 206.394112 | 0.53861112 | 0.00442705 | 0.05691542 |
| H19       | 13475.5423 | -1.4620329 | 0.00442983 | 0.05691542 |
| LRIT3     | 8.68846458 | 1.04197954 | 0.00442334 | 0.05691542 |
| MTSS1L    | 1532.41335 | -0.806025  | 0.00440688 | 0.05691542 |
| PI4KB     | 1410.24429 | -0.2615663 | 0.00441218 | 0.05691542 |
| PIP5K1A   | 1264.55959 | -0.4417414 | 0.00442327 | 0.05691542 |
| RTKN      | 289.876196 | -0.6289715 | 0.00441663 | 0.05691542 |
| SGK1      | 2778.67963 | 0.97949674 | 0.00441634 | 0.05691542 |
| SMAD5     | 2231.53611 | 0.45980737 | 0.00443287 | 0.05691542 |
| CENPE     | 140.260413 | -1.0009327 | 0.00445076 | 0.05710347 |
| IDH3A     | 850.762888 | -0.7592703 | 0.00445792 | 0.05712337 |
| LRRC38    | 94.9163077 | -1.3166308 | 0.00445881 | 0.05712337 |
| SNORA53   | 822.408514 | -0.806796  | 0.00446305 | 0.05713619 |
| PSMD1     | 1447.79871 | -0.323311  | 0.00447319 | 0.05722428 |
| C10orf2   | 169.570123 | -0.8307185 | 0.00447881 | 0.05725458 |
| GATSL2    | 360.967222 | -0.5180188 | 0.00449605 | 0.05743186 |
| SYCP2     | 95.6139762 | 1.28486746 | 0.00450228 | 0.05743186 |
| SYVN1     | 743.308005 | -0.4836508 | 0.00450248 | 0.05743186 |
| FAM64A    | 12.884585  | -1.1623211 | 0.0045633  | 0.05816554 |
| EHD3      | 185.320994 | -1.0002367 | 0.00457101 | 0.05822161 |
| PKD1L1    | 25.6654873 | 0.75573502 | 0.00459866 | 0.05853148 |
| ANKRD22   | 106.482737 | 1.35215537 | 0.00461281 | 0.05854213 |
| EDC3      | 547.469837 | -0.5021533 | 0.0046122  | 0.05854213 |
| HIST1H2BL | 71.5843595 | -0.8752459 | 0.00460733 | 0.05854213 |
| OLFM4     | 107.744791 | -1.3098076 | 0.00460406 | 0.05854213 |
| USP22     | 5114.42123 | -0.2822917 | 0.00462872 | 0.0587017  |
| CACFD1    | 246.951225 | -0.5324579 | 0.00463265 | 0.05870916 |
| ATP5H     | 864.491629 | -0.5317001 | 0.00463893 | 0.05874643 |
| MEF2BNB   | 102.175816 | -0.404804  | 0.00464813 | 0.05882061 |
| OGDHL     | 631.046674 | -1.2504116 | 0.00466178 | 0.05895085 |
| NFKBIA    | 2331.13834 | 0.64827695 | 0.00467163 | 0.05903299 |
| REV3L     | 1414.28752 | 0.56243808 | 0.0046803  | 0.0590489  |
| SLC6A4    | 129.222134 | 1.45222422 | 0.00468029 | 0.0590489  |
| UNC13C    | 6.82379954 | -1.3676112 | 0.00468296 | 0.0590489  |
| ABC3      | 628.150914 | -0.2592692 | 0.00469203 | 0.05912094 |
| SERPINB10 | 10.660512  | -1.450311  | 0.00470731 | 0.05922863 |

|             |            |            |            |            |
|-------------|------------|------------|------------|------------|
| TNFRSF12A   | 109.989699 | -1.0151776 | 0.00470439 | 0.05922863 |
| ENOSF1      | 464.894621 | 0.60488755 | 0.00472068 | 0.05935432 |
| CDCA2       | 77.939032  | -1.2074363 | 0.0047297  | 0.05942527 |
| CNN2        | 821.020199 | 0.91201053 | 0.0047454  | 0.05957933 |
| LYZ         | 460.679776 | 1.08430769 | 0.00475889 | 0.05957933 |
| PAFAH1B3    | 97.7260217 | -0.6870667 | 0.00475758 | 0.05957933 |
| SUCNR1      | 9.32426093 | 1.33288117 | 0.00475854 | 0.05957933 |
| ZER1        | 975.79909  | -0.2811065 | 0.00475494 | 0.05957933 |
| TF          | 891.361795 | -1.4407533 | 0.00477931 | 0.05979233 |
| NELL2       | 46.4406824 | -1.2348406 | 0.00479087 | 0.05989439 |
| DCPS        | 134.600549 | -0.4296463 | 0.00479464 | 0.0598989  |
| GINS2       | 51.266067  | -1.126402  | 0.00480145 | 0.05994149 |
| NR2F1-AS1   | 328.316341 | 1.01990095 | 0.00481716 | 0.06009498 |
| NOL12       | 148.132498 | 0.49976185 | 0.00482147 | 0.06010606 |
| CCDC175     | 11.8188737 | 1.44838667 | 0.00483091 | 0.06013848 |
| DCHS2       | 378.109381 | -1.3264042 | 0.00482999 | 0.06013848 |
| TRIT1       | 157.069383 | 0.67146224 | 0.00483648 | 0.06016532 |
| CADM3       | 24.7724202 | -1.3772983 | 0.00485525 | 0.06022844 |
| DPM3        | 120.0774   | -0.5833015 | 0.00485226 | 0.06022844 |
| GBA2        | 1240.68969 | -0.4800638 | 0.00485189 | 0.06022844 |
| RAI1        | 874.337993 | -0.5385548 | 0.00484841 | 0.06022844 |
| APOBEC3B    | 10.328715  | -1.0161492 | 0.00486676 | 0.06032865 |
| RSF1        | 1468.00614 | -0.3271816 | 0.00487094 | 0.06033796 |
| KMT2D       | 4134.92374 | -0.4465098 | 0.00488179 | 0.06039952 |
| RPS16       | 4029.24921 | -0.7742386 | 0.00488278 | 0.06039952 |
| PPP1R12B    | 2184.45996 | 0.55356658 | 0.00489262 | 0.06044266 |
| ULK1        | 928.997369 | -0.6191068 | 0.00489314 | 0.06044266 |
| RBM4        | 718.766728 | -0.3605022 | 0.00489716 | 0.06044983 |
| NPHP3       | 199.792151 | 0.46990021 | 0.00490064 | 0.06045042 |
| REPIN1      | 849.548658 | -0.5586223 | 0.00491104 | 0.06053627 |
| CLK2        | 696.250375 | -0.4781837 | 0.00492035 | 0.06060847 |
| LOC1019272  | 2.28517208 | 1.44162799 | 0.00492845 | 0.06066575 |
| HCG11       | 355.882328 | 0.95391719 | 0.00493426 | 0.06069484 |
| CXCL16      | 556.142166 | 0.6985937  | 0.00494218 | 0.0607074  |
| NSUN5P1     | 303.427761 | 0.70817596 | 0.00494189 | 0.0607074  |
| KHNYN       | 1132.28657 | 0.50750961 | 0.00494837 | 0.06074095 |
| ATP2A2      | 4089.59735 | -0.4591633 | 0.00495559 | 0.06074487 |
| RGS18       | 75.3373293 | 1.10622125 | 0.00495502 | 0.06074487 |
| TRAF3IP2-AS | 99.1558169 | 0.93859921 | 0.00496288 | 0.06079183 |
| CCNH        | 425.10051  | 0.42582614 | 0.00498456 | 0.06101495 |
| PDE1B       | 61.8168712 | 0.75225524 | 0.00498939 | 0.0610316  |
| NSUN7       | 80.6799572 | -0.8050773 | 0.00499627 | 0.06107325 |
| GORASP2     | 1025.03431 | -0.4126538 | 0.00500297 | 0.06111265 |
| GALNT13     | 17.4973658 | -1.3780566 | 0.00501755 | 0.0612482  |
| GDA         | 13.8464772 | -1.4407077 | 0.00502229 | 0.06126353 |
| CKAP2       | 541.196848 | -0.675572  | 0.00503397 | 0.06131414 |
| HNRNPH3     | 1170.69953 | -0.3901552 | 0.00503689 | 0.06131414 |
| RHOT2       | 749.839717 | -0.4477283 | 0.00503195 | 0.06131414 |
| CDC45       | 26.4369442 | -1.2483797 | 0.00504121 | 0.06132426 |
| SNORA52     | 20.1762829 | 0.96220423 | 0.00505174 | 0.06140987 |

|           |            |            |            |            |
|-----------|------------|------------|------------|------------|
| UVRAG     | 475.716176 | 0.40210903 | 0.00505676 | 0.0614285  |
| RWDD1     | 424.771097 | 0.52279861 | 0.00507325 | 0.06158619 |
| ROR1      | 335.621477 | 1.18433441 | 0.00511752 | 0.06208076 |
| FUT7      | 3.77103372 | 1.21966056 | 0.00512505 | 0.06212934 |
| SLC22A4   | 35.7180829 | 0.85651516 | 0.0051394  | 0.06226041 |
| VANGL2    | 428.511389 | -0.5936418 | 0.0051465  | 0.06230341 |
| AOAH      | 228.152811 | 1.00970322 | 0.00515458 | 0.06231548 |
| PM20D1    | 6.3717607  | 1.41860078 | 0.00515133 | 0.06231548 |
| MFSD3     | 118.590727 | -0.629548  | 0.00516234 | 0.0623664  |
| AOAH-IT1  | 3.30808031 | 1.40935483 | 0.00516938 | 0.06240868 |
| KLHDC7A   | 165.061482 | -1.4165095 | 0.00519698 | 0.06269883 |
| NRK       | 7.74432513 | 1.39998411 | 0.00520416 | 0.06274246 |
| LINC00486 | 1.68177761 | 1.39139492 | 0.00522829 | 0.06275857 |
| MISP      | 44.2150991 | -1.3161495 | 0.00522136 | 0.06275857 |
| MPPE1     | 360.549037 | 0.51814528 | 0.00521268 | 0.06275857 |
| RNF146    | 778.089527 | 0.6140877  | 0.00521008 | 0.06275857 |
| THEM6     | 256.081564 | -0.6843767 | 0.00522387 | 0.06275857 |
| UBXN4     | 2369.71476 | -0.2805858 | 0.00523048 | 0.06275857 |
| XCL1      | 2.02661592 | 1.35872006 | 0.00522746 | 0.06275857 |
| MAP1LC3B  | 1357.04694 | -0.4506641 | 0.00524148 | 0.06278025 |
| PHYHIPL   | 11.1751061 | -1.3710769 | 0.00524224 | 0.06278025 |
| SLC12A8   | 17.8157457 | -1.0967189 | 0.00524299 | 0.06278025 |
| SNX22     | 22.5688493 | 1.11254228 | 0.00525751 | 0.06291131 |
| SPTBN2    | 296.987874 | -1.0012533 | 0.00526981 | 0.06297393 |
| ZFP41     | 387.599033 | -0.5247829 | 0.00526991 | 0.06297393 |
| MTMR4     | 1563.20035 | -0.4649125 | 0.00527748 | 0.06302167 |
| RPF2      | 255.094655 | 0.51744196 | 0.00529015 | 0.06313013 |
| DDX60L    | 624.713464 | 0.73952208 | 0.00530534 | 0.06314006 |
| EMC6      | 125.510461 | -0.618083  | 0.00530416 | 0.06314006 |
| IBA57     | 476.805809 | -0.4431109 | 0.00530261 | 0.06314006 |
| LIMK1     | 450.997546 | -0.5423185 | 0.00529542 | 0.06314006 |
| FAIM2     | 32.5764038 | -1.3142549 | 0.00533202 | 0.06341459 |
| CENPP     | 165.767334 | -0.7093026 | 0.00534064 | 0.06347235 |
| FIGNL2    | 8.10312593 | 1.2754611  | 0.00535131 | 0.06347235 |
| NCAPG2    | 295.068998 | -0.6552961 | 0.00535047 | 0.06347235 |
| SKIV2L2   | 1074.88126 | 0.26100023 | 0.00534582 | 0.06347235 |
| C11orf80  | 96.2688336 | -0.6794979 | 0.0053812  | 0.06374096 |
| SPIRE2    | 125.040861 | -1.0564163 | 0.00537975 | 0.06374096 |
| CPSF4     | 229.085268 | 0.40422699 | 0.00539355 | 0.06379865 |
| ECM2      | 1864.13354 | 0.74269672 | 0.00539248 | 0.06379865 |
| XRCC1     | 393.791622 | -0.273606  | 0.00539695 | 0.06379865 |
| QRFPR     | 22.275286  | 1.42974672 | 0.00540471 | 0.06380462 |
| TGM5      | 2.00783131 | 1.23589107 | 0.00540124 | 0.06380462 |
| PTPRZ1    | 17.6295957 | -1.4298618 | 0.00541089 | 0.06383466 |
| C12orf29  | 139.927624 | 0.36876324 | 0.0054412  | 0.06413304 |
| DOCK7     | 931.525089 | 0.56130915 | 0.00544347 | 0.06413304 |
| EEF1A1    | 72424.0787 | 0.56721496 | 0.00545002 | 0.06416728 |
| POC1A     | 35.5166157 | -0.8009907 | 0.00545612 | 0.06419607 |
| PPP6R3    | 2402.74013 | -0.2865113 | 0.00547731 | 0.06440233 |
| EI24      | 951.135265 | -0.3041846 | 0.00549853 | 0.06456549 |

|            |            |            |            |            |
|------------|------------|------------|------------|------------|
| LOC1019271 | 1.98396388 | 1.39707562 | 0.00549725 | 0.06456549 |
| FBXL4      | 509.425143 | 0.54057298 | 0.00551808 | 0.06475191 |
| CD2        | 18.7311302 | 1.19028981 | 0.00553278 | 0.06479462 |
| SMIM8      | 128.035042 | 0.59084476 | 0.00553127 | 0.06479462 |
| ZCCHC14    | 1000.10242 | -0.5339689 | 0.00552996 | 0.06479462 |
| SV2B       | 25.4268329 | -1.369538  | 0.00553723 | 0.06480369 |
| GALR1      | 8.20608744 | -1.3968436 | 0.00555028 | 0.06491314 |
| SCAMP5     | 298.258001 | -0.9640464 | 0.00556222 | 0.06500956 |
| ZNF503     | 863.818222 | -0.924981  | 0.00557032 | 0.06506103 |
| PPIF       | 540.165842 | -0.7968083 | 0.00558013 | 0.06513233 |
| CHST7      | 71.4249869 | 1.05372209 | 0.00559086 | 0.06521428 |
| ZC3H18     | 553.588682 | -0.4308902 | 0.00560653 | 0.06535378 |
| COX6B2     | 5.2221668  | -1.3646098 | 0.00561461 | 0.06540462 |
| CDK15      | 7.17600588 | 1.16412342 | 0.00563702 | 0.06557882 |
| PSD        | 24.7597973 | -1.0820648 | 0.00563601 | 0.06557882 |
| CHST11     | 599.081514 | 0.76369272 | 0.0056492  | 0.06563372 |
| ZEB2-AS1   | 1.32368021 | 1.36184111 | 0.00564915 | 0.06563372 |
| DDX39A     | 366.462655 | -0.5387024 | 0.00569517 | 0.06612407 |
| CCNB3      | 9.62144859 | -1.0730091 | 0.00569923 | 0.06612759 |
| CFP        | 13.6705981 | 0.96976251 | 0.00571028 | 0.06621211 |
| C5orf49    | 3.05683968 | 1.35757893 | 0.0057306  | 0.06634594 |
| GUSBP4     | 44.0534114 | 0.73322231 | 0.00573313 | 0.06634594 |
| PMEL       | 29.7234524 | -0.9855012 | 0.00572862 | 0.06634594 |
| GAPT       | 70.6416616 | 1.11714321 | 0.00573885 | 0.06636844 |
| LOC1001305 | 10.0375103 | -1.4198576 | 0.00574418 | 0.06638637 |
| ARMC7      | 204.768554 | -0.7404941 | 0.00576153 | 0.06643255 |
| HIVEP2     | 1004.77078 | 0.53452214 | 0.00576231 | 0.06643255 |
| LINC00260  | 73.8223309 | -0.7408331 | 0.00576328 | 0.06643255 |
| SEC31B     | 405.172773 | 0.56560755 | 0.00575628 | 0.06643255 |
| IL2RG      | 27.4951858 | 1.07213033 | 0.00577179 | 0.06648711 |
| LPCAT2     | 462.831246 | 0.99039592 | 0.00577732 | 0.06650728 |
| ITIH2      | 1403.05965 | 1.29701162 | 0.00580339 | 0.06672002 |
| SNTB2      | 1539.15493 | 0.64137246 | 0.0058015  | 0.06672002 |
| MAPK7      | 342.564725 | -0.4227899 | 0.00580793 | 0.06672154 |
| RPS14      | 5360.01173 | 0.46829599 | 0.00581111 | 0.06672154 |
| PKIB       | 55.5752694 | 1.10964947 | 0.00582218 | 0.06680507 |
| C17orf89   | 158.521387 | -0.6377718 | 0.00584776 | 0.06686476 |
| DDIT4      | 2655.66891 | 1.02344923 | 0.00583503 | 0.06686476 |
| ELAC2      | 872.003181 | -0.3508181 | 0.00585779 | 0.06686476 |
| LOC1019272 | 7.77615769 | -1.4131086 | 0.0058492  | 0.06686476 |
| NPPA-AS1   | 5.37771404 | 1.09609348 | 0.00585468 | 0.06686476 |
| SAMD9L     | 1498.68799 | 0.45590142 | 0.00583225 | 0.06686476 |
| ZNF559     | 421.651756 | 0.50447723 | 0.00585529 | 0.06686476 |
| ZNF57      | 111.988631 | -1.0557548 | 0.00585172 | 0.06686476 |
| HSPD1      | 3053.22197 | -0.6076484 | 0.00586335 | 0.06688475 |
| LOC1019287 | 5.42803061 | 1.3819573  | 0.00587154 | 0.06693478 |
| LOC1002889 | 30.2617573 | 1.0384787  | 0.00587575 | 0.06693946 |
| RAMP1      | 31.9463908 | -1.300571  | 0.005892   | 0.06708109 |
| ZNF674     | 92.8306411 | 0.51104139 | 0.0059041  | 0.06717538 |
| CHERP      | 599.004873 | -0.4842045 | 0.00591301 | 0.06718987 |

|            |            |            |            |            |
|------------|------------|------------|------------|------------|
| ZBTB46     | 547.545263 | -0.7844902 | 0.00590949 | 0.06718987 |
| S1PR4      | 4.61156697 | 1.19628042 | 0.00591847 | 0.06720841 |
| RAB11B     | 908.885037 | -0.5295726 | 0.00592844 | 0.06727826 |
| PLA2G3     | 28.4466703 | -1.395845  | 0.00596003 | 0.06759313 |
| UBN1       | 878.561784 | -0.246809  | 0.00598312 | 0.06781129 |
| COL6A4P2   | 18.3523729 | 1.31929381 | 0.00599467 | 0.0678202  |
| CSTB       | 924.797617 | -0.7772236 | 0.00599826 | 0.0678202  |
| MARCH8     | 626.506098 | 0.46529177 | 0.00599206 | 0.0678202  |
| STRIP2     | 335.950393 | 0.95759266 | 0.00599933 | 0.0678202  |
| P2RX5      | 20.9619462 | -1.3735595 | 0.00601053 | 0.06786656 |
| UNC13A     | 340.059048 | -1.3450177 | 0.00601115 | 0.06786656 |
| KCTD15     | 473.094064 | -0.705585  | 0.00601692 | 0.06788818 |
| ZNF331     | 580.053114 | 0.71552566 | 0.00602091 | 0.06788961 |
| NFE2L1     | 15083.6028 | -0.4731025 | 0.00602477 | 0.06788966 |
| PHLPP2     | 1241.89966 | -0.6598804 | 0.00602971 | 0.06790175 |
| SLA2       | 9.25717512 | 0.95470225 | 0.00603839 | 0.06795603 |
| MRPS24     | 22.5364258 | -0.7988738 | 0.00605747 | 0.06808361 |
| SLC25A22   | 268.850336 | -0.5022879 | 0.00605451 | 0.06808361 |
| CIAPIN1    | 404.805335 | -0.5505523 | 0.00607453 | 0.06823183 |
| ETV4       | 51.9704662 | -1.2703831 | 0.00610628 | 0.06853423 |
| FAM200A    | 109.603044 | 0.52162858 | 0.00610925 | 0.06853423 |
| ICK        | 618.203465 | 0.68480714 | 0.00611731 | 0.06858088 |
| NABP1      | 272.560044 | 0.89848207 | 0.00614878 | 0.06884601 |
| PLK4       | 75.1299168 | -0.8624847 | 0.00614604 | 0.06884601 |
| ARPC5L     | 169.102961 | -0.3947112 | 0.00615944 | 0.0688587  |
| EAF2       | 47.8869908 | 0.67910202 | 0.00616557 | 0.0688587  |
| ELOVL2     | 191.454218 | -1.2377104 | 0.00615623 | 0.0688587  |
| NCK2       | 1153.49149 | -0.5642976 | 0.00616232 | 0.0688587  |
| SUPT3H     | 96.6941348 | 0.78641569 | 0.00617012 | 0.06886578 |
| LOC1019271 | 2.3389472  | 1.40700437 | 0.00617811 | 0.06891122 |
| DHRS2      | 82.125077  | -1.3840876 | 0.00618497 | 0.06894394 |
| EPS8L2     | 690.567974 | -0.7854088 | 0.00618944 | 0.06895009 |
| KIAA1671   | 4588.91117 | -0.6454011 | 0.0062001  | 0.06899085 |
| MYOZ3      | 141.600014 | 1.23428279 | 0.00620353 | 0.06899085 |
| NAT8L      | 127.393646 | -0.8838707 | 0.00620486 | 0.06899085 |
| MRO        | 359.048622 | -1.0866831 | 0.00621306 | 0.06899473 |
| TMEM255A   | 33.1432279 | -1.3686403 | 0.00621099 | 0.06899473 |
| EEFSEC     | 179.324462 | -0.4754959 | 0.00623337 | 0.06917666 |
| SCP2       | 1068.13341 | 0.52020486 | 0.00624602 | 0.0692733  |
| HIST2H2BF  | 326.124561 | -0.6810791 | 0.0062575  | 0.06935693 |
| CARF       | 420.413737 | 0.41693356 | 0.00627469 | 0.06945986 |
| PDIK1L     | 132.591691 | 0.47772894 | 0.00627388 | 0.06945986 |
| TRNT1      | 286.624074 | -0.4480701 | 0.0062795  | 0.06946949 |
| CD96       | 20.8541379 | 1.04770698 | 0.00628814 | 0.06947762 |
| SYNGR2     | 740.582145 | -0.6948021 | 0.00628431 | 0.06947762 |
| FITM2      | 108.07815  | -0.515004  | 0.0062988  | 0.06955168 |
| PDK4       | 1236.06121 | 1.16445164 | 0.00631684 | 0.06970715 |
| CTDSP1     | 2173.20378 | -0.2455021 | 0.00632615 | 0.06976614 |
| CAMKK2     | 678.591547 | -0.3665919 | 0.00633173 | 0.0697839  |
| AIG1       | 437.373804 | 0.57260121 | 0.00635671 | 0.07001533 |



|            |            |            |            |            |
|------------|------------|------------|------------|------------|
| CXorf56    | 266.651562 | 0.36137981 | 0.00636077 | 0.07001625 |
| CDKN2A     | 44.3753833 | -1.30695   | 0.00637062 | 0.07008075 |
| MIR5572    | 1.53033586 | -1.3356566 | 0.00637795 | 0.07011754 |
| GLI2       | 776.124295 | -0.5731502 | 0.00639271 | 0.07023599 |
| LOC1005065 | 30.7798968 | 1.05395867 | 0.0063982  | 0.0702524  |
| SFXN1      | 579.156389 | -0.5499733 | 0.00641865 | 0.070433   |
| AFMID      | 226.139881 | -0.6583809 | 0.00644911 | 0.0705111  |
| C1GALT1    | 439.416701 | 0.67623731 | 0.00644278 | 0.0705111  |
| CRYBB3     | 15.3762176 | -1.1724154 | 0.00643677 | 0.0705111  |
| FIRRE      | 69.2577526 | -1.3410921 | 0.00644714 | 0.0705111  |
| QKI        | 4881.01974 | 0.37435863 | 0.00644982 | 0.0705111  |
| WHAMMP3    | 129.087267 | 0.55234857 | 0.00643798 | 0.0705111  |
| CHCHD6     | 131.189074 | 0.92335625 | 0.0064684  | 0.0706008  |
| FBLN1      | 2178.81423 | 1.37307973 | 0.00647616 | 0.0706008  |
| GLMN       | 75.7645119 | 0.74005732 | 0.00647167 | 0.0706008  |
| GPI        | 4221.6021  | -0.6210638 | 0.00646253 | 0.0706008  |
| TSC22D3    | 5050.89579 | 0.91327237 | 0.0064781  | 0.0706008  |
| LAMC3      | 98.8062433 | -1.233243  | 0.00648256 | 0.07060567 |
| MRRF       | 306.875979 | -0.4492405 | 0.00650342 | 0.07078531 |
| PRRT3      | 96.9781263 | -0.8283575 | 0.0065071  | 0.07078531 |
| TBC1D8     | 2814.24225 | -0.8683395 | 0.00653515 | 0.0710465  |
| DNAH12     | 46.9387259 | 1.13457881 | 0.00658559 | 0.07155063 |
| LOC1019272 | 37.7708471 | 0.59421365 | 0.00660707 | 0.07173975 |
| CASS4      | 94.4592572 | 1.08591875 | 0.00661186 | 0.07174748 |
| FXYP1      | 326.7294   | 0.89654685 | 0.00664018 | 0.07187925 |
| MSI2       | 1515.47305 | -0.5149068 | 0.00664444 | 0.07187925 |
| NCAPD3     | 495.490632 | -0.4398607 | 0.00663184 | 0.07187925 |
| PDE2A      | 84.5137286 | 1.10285979 | 0.00663639 | 0.07187925 |
| TWIST2     | 85.3157495 | -1.0521586 | 0.00664272 | 0.07187925 |
| RNU6ATAC   | 10.157866  | 1.23520238 | 0.00665588 | 0.07195873 |
| HORMAD1    | 2.36202051 | 1.3686604  | 0.0066713  | 0.07204093 |
| TPRXL      | 8.08744902 | -1.1928687 | 0.00667167 | 0.07204093 |
| GPR19      | 3.33951177 | -1.3383385 | 0.00669881 | 0.07228963 |
| RLF        | 546.507852 | 0.56751135 | 0.00671359 | 0.07240472 |
| NALCN-AS1  | 2.63608729 | 1.35996613 | 0.00672471 | 0.07248019 |
| FAM131A    | 201.700396 | 0.8123818  | 0.00675256 | 0.07250355 |
| FAM134A    | 1354.54853 | -0.368192  | 0.0067454  | 0.07250355 |
| FBLL1      | 19.2394899 | -1.23484   | 0.0067552  | 0.07250355 |
| MYOC       | 1.72997171 | 1.39068877 | 0.00674622 | 0.07250355 |
| TMC4       | 95.3806337 | 1.13206521 | 0.00673428 | 0.07250355 |
| TRABD2A    | 15.4216812 | -1.0676104 | 0.00674948 | 0.07250355 |
| TRIM59     | 89.3428754 | -1.0335043 | 0.00675573 | 0.07250355 |
| RIMS2      | 6.49587886 | -1.38569   | 0.00677058 | 0.07261864 |
| BAZ2A      | 2611.2002  | -0.44271   | 0.00678616 | 0.07272746 |
| TNFSF13B   | 81.1130181 | 0.76997422 | 0.006789   | 0.07272746 |
| CSNK2A3    | 11.4656862 | -1.1057021 | 0.0068011  | 0.0728128  |
| CHST6      | 6.4917891  | -1.1897552 | 0.00682713 | 0.07300254 |
| MYBPC2     | 15.7780267 | -1.3088914 | 0.00682359 | 0.07300254 |
| ANGPTL1    | 10.5167893 | -1.3827025 | 0.00685906 | 0.07321595 |
| CLN6       | 380.044317 | -0.5672359 | 0.00687059 | 0.07321595 |

|            |            |            |            |            |
|------------|------------|------------|------------|------------|
| FAM73A     | 525.401744 | 0.4784359  | 0.00686531 | 0.07321595 |
| SLC2A13    | 185.27988  | 0.79147844 | 0.00685182 | 0.07321595 |
| STMN2      | 3.10385714 | -1.3896621 | 0.00686446 | 0.07321595 |
| SYMPK      | 1154.12467 | -0.3510298 | 0.00687206 | 0.07321595 |
| CAP1       | 2228.07733 | 0.43871854 | 0.006885   | 0.07326509 |
| SNORA47    | 144.992718 | -0.8038545 | 0.0068835  | 0.07326509 |
| CD22       | 38.0405981 | -1.2608932 | 0.00689604 | 0.07330689 |
| FBXL19     | 342.696043 | -0.40624   | 0.00689727 | 0.07330689 |
| N4BP3      | 192.540667 | -0.9972669 | 0.00690974 | 0.07339512 |
| DDAH1      | 658.306134 | 0.89181048 | 0.00692171 | 0.07347788 |
| TMEFF2     | 3.06989736 | -1.3696019 | 0.00692639 | 0.07348328 |
| TRPV6      | 2.99630096 | -1.2318179 | 0.00693234 | 0.07350207 |
| RBM4B      | 237.964997 | -0.314522  | 0.00694004 | 0.07353934 |
| LOC1001295 | 15.6084899 | 0.85657385 | 0.0069575  | 0.07367997 |
| MTR        | 2279.06408 | -0.4132623 | 0.00697119 | 0.07373612 |
| PHC2       | 844.763143 | 0.67854146 | 0.00697053 | 0.07373612 |
| WFIKN1     | 3.84945437 | -1.2752951 | 0.00697632 | 0.07374613 |
| C10orf85   | 2.02669293 | 1.37390366 | 0.00699328 | 0.07374813 |
| HNMT       | 721.083848 | 0.69991166 | 0.00698714 | 0.07374813 |
| MYO3A      | 121.977745 | -1.3066181 | 0.00698843 | 0.07374813 |
| SLC24A4    | 21.6598742 | 1.0941425  | 0.00699238 | 0.07374813 |
| YY1AP1     | 935.653986 | -0.3110162 | 0.00702491 | 0.0740373  |
| WFDC10B    | 2.16401842 | 1.38153143 | 0.00704695 | 0.07422509 |
| RGS2       | 364.487017 | 1.11604499 | 0.00705636 | 0.0742797  |
| PSME3      | 1028.2267  | -0.3873644 | 0.00708571 | 0.074544   |
| ANAPC16    | 801.529816 | 0.50667458 | 0.00712887 | 0.0745605  |
| APOD       | 2561.11528 | 1.34493362 | 0.00709186 | 0.0745605  |
| DKFZP58614 | 243.549029 | 0.63993747 | 0.00712376 | 0.0745605  |
| FBXO43     | 8.2409028  | -1.1077351 | 0.00712334 | 0.0745605  |
| GSK3B      | 1460.48401 | -0.2985407 | 0.00712264 | 0.0745605  |
| HIST2H2AC  | 576.587367 | -0.4729899 | 0.00712197 | 0.0745605  |
| NEK11      | 116.819904 | 0.84870477 | 0.00712707 | 0.0745605  |
| SEC61G     | 198.37667  | 0.61566205 | 0.00711761 | 0.0745605  |
| SETD1B     | 915.850324 | -0.3953702 | 0.00711644 | 0.0745605  |
| XRCC2      | 62.2740623 | -0.9069593 | 0.00712966 | 0.0745605  |
| CXCR3      | 2.4690869  | 1.25358641 | 0.00713403 | 0.07456189 |
| GTF2IRD1   | 586.661702 | -0.5949058 | 0.00714839 | 0.07466752 |
| SWSAP1     | 30.9462481 | 0.65841211 | 0.007172   | 0.07486972 |
| MAL        | 4.07708762 | -1.3733071 | 0.00718375 | 0.07490347 |
| SEPP1      | 3429.86545 | 0.873289   | 0.00718301 | 0.07490347 |
| GOLM1      | 1771.15419 | -0.5963552 | 0.00719107 | 0.07491947 |
| KIN        | 266.199672 | 0.34762612 | 0.0072     | 0.07491947 |
| NCKAP5     | 133.342158 | 0.82041712 | 0.00719956 | 0.07491947 |
| UGT8       | 7.34085992 | -1.3588731 | 0.00720232 | 0.07491947 |
| YTHDF1     | 938.349134 | -0.5072065 | 0.00721737 | 0.07503163 |
| FRAT1      | 111.345698 | 0.892625   | 0.00722329 | 0.07504885 |
| SNAPC4     | 275.142855 | -0.4143946 | 0.00722815 | 0.07505501 |
| DPYD       | 658.151311 | 0.80614371 | 0.00725658 | 0.07530575 |
| HLA-DQA1   | 362.607791 | 1.24692679 | 0.00731396 | 0.07585644 |
| SPN        | 89.7027575 | 1.06549501 | 0.00732131 | 0.07588795 |

|            |            |            |            |            |
|------------|------------|------------|------------|------------|
| ERAL1      | 341.126496 | -0.3259454 | 0.0073296  | 0.07591108 |
| TNFRSF1B   | 692.467589 | 0.75399358 | 0.00733217 | 0.07591108 |
| USP43      | 50.0868464 | -1.0280823 | 0.00733761 | 0.07592265 |
| PCNT       | 1259.45603 | -0.5157463 | 0.00735042 | 0.07601048 |
| PTMA       | 4515.25657 | -0.4510202 | 0.00736443 | 0.0760213  |
| ST6GALNAC4 | 356.019739 | -0.7474887 | 0.00736211 | 0.0760213  |
| TRIM38     | 797.731274 | 0.36543132 | 0.00736086 | 0.0760213  |
| DAPL1      | 44.5547071 | -1.375088  | 0.00738191 | 0.07602333 |
| ITGAX      | 416.800742 | 0.95708409 | 0.00738057 | 0.07602333 |
| LRRC66     | 13.5859959 | 0.99498072 | 0.00737088 | 0.07602333 |
| RTCB       | 556.417645 | 0.46526524 | 0.00738038 | 0.07602333 |
| COX8A      | 1046.55534 | -0.4613345 | 0.00738814 | 0.07604294 |
| ZC3HAV1L   | 242.16514  | -0.533992  | 0.00741562 | 0.07628116 |
| THAP3      | 88.9547193 | 0.49933557 | 0.00742424 | 0.07632517 |
| HRH2       | 26.2884063 | 1.00653559 | 0.00742941 | 0.07633368 |
| UBAP2      | 800.526155 | -0.5093192 | 0.0074365  | 0.07636196 |
| PPP5D1     | 8.36028369 | 1.06002587 | 0.00745969 | 0.07655536 |
| PHKB       | 1581.52667 | -0.2486273 | 0.00747928 | 0.07671165 |
| SNORA22    | 91.4601122 | -0.9014758 | 0.00749196 | 0.076797   |
| AGAP1      | 981.878979 | -0.6289205 | 0.00750487 | 0.07683119 |
| IGF1       | 656.19493  | 1.21762476 | 0.0075084  | 0.07683119 |
| SLC50A1    | 279.539905 | -0.4904021 | 0.00750341 | 0.07683119 |
| AP2B1      | 4906.69735 | -0.420947  | 0.00755095 | 0.07700654 |
| CLSPN      | 99.2796124 | -0.9061021 | 0.00755181 | 0.07700654 |
| EXOC3L1    | 18.2225992 | -0.8517377 | 0.00754821 | 0.07700654 |
| LRCH1      | 540.727939 | 0.94386298 | 0.0075351  | 0.07700654 |
| SIAE       | 625.224355 | -0.6973814 | 0.00753678 | 0.07700654 |
| VPS4A      | 992.212736 | -0.3558222 | 0.00754801 | 0.07700654 |
| GSTM5      | 127.50856  | 1.30779805 | 0.00756275 | 0.07707341 |
| CD19       | 2.00194291 | 1.3664171  | 0.00758995 | 0.07726113 |
| SHC4       | 273.00258  | 1.29300012 | 0.00758736 | 0.07726113 |
| LRRC24     | 39.3991708 | -0.6898899 | 0.00762504 | 0.07743905 |
| NPRL3      | 445.380552 | -0.5168202 | 0.00762186 | 0.07743905 |
| PPAPDC1A   | 13.0121451 | 1.33254159 | 0.00761966 | 0.07743905 |
| ST8SIA4    | 318.592252 | 0.6874842  | 0.00761927 | 0.07743905 |
| CEP120     | 1145.50328 | 0.63001476 | 0.00766255 | 0.07768542 |
| SFRP1      | 1246.21992 | 1.34289952 | 0.00765898 | 0.07768542 |
| ZNF552     | 101.359538 | -0.4345508 | 0.00766107 | 0.07768542 |
| CLEC4E     | 58.3287264 | 1.24811922 | 0.00768062 | 0.07782384 |
| RPS23      | 6159.9106  | 0.48475512 | 0.00770842 | 0.07806056 |
| TMEM132A   | 293.960091 | -1.0659121 | 0.00771661 | 0.0780985  |
| CADPS2     | 1125.09816 | -0.9046582 | 0.00772116 | 0.07809962 |
| NDUFB2-AS1 | 6.24295045 | -0.9780856 | 0.0077492  | 0.07833815 |
| LRRC8A     | 898.879648 | -0.4335187 | 0.00776225 | 0.07838003 |
| ZIC3       | 3.57793925 | -1.3677678 | 0.00775803 | 0.07838003 |
| OSBP       | 1345.09887 | -0.3364541 | 0.00778612 | 0.07855951 |
| SEC16A     | 3061.50191 | -0.396876  | 0.00778896 | 0.07855951 |
| RNF152     | 133.022328 | 1.1191809  | 0.00779578 | 0.07858328 |
| HTRA3      | 85.7421346 | -1.2049246 | 0.00780089 | 0.07858968 |
| TSTA3      | 308.407137 | -0.6239679 | 0.00781715 | 0.0787085  |

|           |            |            |            |            |
|-----------|------------|------------|------------|------------|
| SLC22A20  | 9.06765585 | -1.0814901 | 0.0078242  | 0.0787344  |
| C1QTNF2   | 31.2511423 | 1.14869369 | 0.00786995 | 0.07897312 |
| DPF1      | 3.62336971 | -1.2745987 | 0.00787037 | 0.07897312 |
| FGD1      | 328.426605 | -0.4468967 | 0.00786895 | 0.07897312 |
| LAMA5     | 6392.39045 | -1.04763   | 0.00786443 | 0.07897312 |
| MPHOSPH6  | 104.383524 | 0.61250931 | 0.0078613  | 0.07897312 |
| BLOC1S6   | 966.662705 | 0.38008975 | 0.0078809  | 0.07902983 |
| C1orf61   | 6.60112108 | -1.3399154 | 0.00788501 | 0.07902983 |
| SULT1E1   | 46.9064246 | -1.3655629 | 0.00789634 | 0.07909831 |
| EBF3      | 261.419946 | 1.20634404 | 0.00793303 | 0.07942065 |
| GOLGA8N   | 104.48881  | 0.71880309 | 0.0079693  | 0.07965506 |
| KIRREL2   | 6.34369895 | -1.3571089 | 0.00796171 | 0.07965506 |
| SNAI3     | 19.0466897 | 1.20328117 | 0.00797003 | 0.07965506 |
| SLC39A4   | 51.2174747 | -0.9393497 | 0.00797902 | 0.07969963 |
| FOXD2     | 985.867828 | -0.7040362 | 0.00800123 | 0.07985256 |
| SDCCAG3   | 323.487109 | -0.3889491 | 0.00800341 | 0.07985256 |
| STIP1     | 1039.55486 | -0.4937859 | 0.0080081  | 0.07985405 |
| KIAA1107  | 95.0899433 | 0.80434909 | 0.00802105 | 0.07993779 |
| WLS       | 1641.20846 | 0.66990805 | 0.00805629 | 0.08024352 |
| LOC283731 | 3.82649162 | -1.3377782 | 0.00806903 | 0.08032494 |
| ZNF579    | 110.928098 | -0.597411  | 0.00811577 | 0.08074458 |
| SLAMF1    | 3.01500642 | 1.31262687 | 0.00812561 | 0.08079672 |
| C1orf198  | 1007.91842 | 0.72718818 | 0.00814756 | 0.08096927 |
| KRTAP5-10 | 2.89670533 | -1.2504201 | 0.00815649 | 0.08097997 |
| TLX1NB    | 1.30583485 | 1.25932515 | 0.00815785 | 0.08097997 |
| HIC1      | 593.362307 | -0.6864376 | 0.0081648  | 0.08098283 |
| TACO1     | 181.921377 | -0.4827885 | 0.00816734 | 0.08098283 |
| ADAM20    | 89.4721456 | 0.71543662 | 0.00818912 | 0.08106166 |
| GLIS2     | 1186.00038 | -0.6665973 | 0.0081813  | 0.08106166 |
| OXCT1-AS1 | 7.8274801  | 1.09102863 | 0.00818859 | 0.08106166 |
| PDIA2     | 14.9532241 | 1.1735459  | 0.00821559 | 0.08127794 |
| B4GALT6   | 188.864157 | 0.93701003 | 0.00823802 | 0.08137546 |
| FAM157B   | 1.7965365  | 1.29925748 | 0.00823932 | 0.08137546 |
| MTMR3     | 1127.46056 | 0.34116455 | 0.0082353  | 0.08137546 |
| KPNA5     | 253.096579 | 0.61969571 | 0.00824592 | 0.08139492 |
| AQP6      | 2.53211799 | -1.3245364 | 0.00825707 | 0.08145914 |
| CENPK     | 50.3279916 | -1.0301507 | 0.00826169 | 0.08145914 |
| PI16      | 91.0604743 | 1.34990953 | 0.0082931  | 0.08172301 |
| AFAP1     | 3235.3442  | -0.6465041 | 0.00831173 | 0.08186073 |
| PSMD2     | 2140.87467 | -0.2986027 | 0.00833909 | 0.08208426 |
| BCL11A    | 13.1524702 | -1.2515067 | 0.00840874 | 0.0826784  |
| CTSS      | 922.399261 | 0.73459492 | 0.00840885 | 0.0826784  |
| SPOCK1    | 20.4803096 | -1.2054319 | 0.00844409 | 0.08297855 |
| C5orf45   | 158.642865 | 0.48442137 | 0.00845365 | 0.08300129 |
| RAD54L    | 25.2271469 | -0.874106  | 0.00845584 | 0.08300129 |
| ADAMTS8   | 4.23374591 | -1.2876615 | 0.00847028 | 0.0830315  |
| CD93      | 1669.44188 | 0.72377207 | 0.00847308 | 0.0830315  |
| MNDA      | 187.513684 | 0.88440434 | 0.00847297 | 0.0830315  |
| AQP5      | 33.5413778 | -1.3515927 | 0.00852513 | 0.08344852 |
| TLR5      | 129.703653 | 0.91485303 | 0.00852235 | 0.08344852 |

|          |            |            |            |            |
|----------|------------|------------|------------|------------|
| ECT2     | 283.98822  | -0.781238  | 0.00854807 | 0.08350859 |
| NLRC3    | 28.8700799 | 0.77852161 | 0.00854088 | 0.08350859 |
| SEPHS2   | 442.84727  | -0.6046046 | 0.00855025 | 0.08350859 |
| STAG3L2  | 393.629562 | -0.4820947 | 0.00854159 | 0.08350859 |
| PFKFB3   | 1095.32992 | 0.68190771 | 0.00857021 | 0.08365706 |
| COQ4     | 349.273436 | -0.3510392 | 0.00858218 | 0.08372742 |
| HIST1H3D | 205.543917 | -0.5778635 | 0.00859022 | 0.08374512 |
| SLC6A16  | 23.56193   | -1.0881179 | 0.00859352 | 0.08374512 |
| MOB3B    | 191.764371 | 1.14393026 | 0.00860956 | 0.08382351 |
| TMEM44   | 136.046742 | -0.5835957 | 0.00861109 | 0.08382351 |
| UNG      | 458.852563 | -0.4703865 | 0.00862775 | 0.08393922 |
| EIF4H    | 2542.60041 | 0.26345735 | 0.00864249 | 0.08398972 |
| KIF21B   | 170.101855 | 0.81043399 | 0.00863896 | 0.08398972 |
| GOPC     | 775.073207 | 0.45935445 | 0.00865653 | 0.0840797  |
| CHRN2    | 13.6945406 | -1.1283327 | 0.00868735 | 0.08422573 |
| MFSD6L   | 1.5615883  | 1.29666276 | 0.00867949 | 0.08422573 |
| RACGAP1  | 298.266603 | -0.7297039 | 0.00868439 | 0.08422573 |
| TOP1     | 1834.46056 | -0.4056994 | 0.0086952  | 0.08422573 |
| USP32P1  | 458.292133 | -1.2897786 | 0.0086955  | 0.08422573 |
| FAM129B  | 2373.61031 | -0.7306909 | 0.00870377 | 0.08424261 |
| METTL10  | 261.815124 | 0.49096096 | 0.00871293 | 0.08424261 |
| SLC7A5P2 | 311.113632 | -0.7085969 | 0.0087164  | 0.08424261 |
| ZIC4     | 293.497437 | -0.9547033 | 0.00871326 | 0.08424261 |
| GLYR1    | 1388.05145 | -0.2761638 | 0.00872684 | 0.08429716 |
| PCBP1    | 1854.6541  | -0.5438329 | 0.00873388 | 0.08431883 |
| PTH2R    | 16.4102415 | -1.3110094 | 0.00875121 | 0.08443982 |
| MTF2     | 323.418175 | 0.49828425 | 0.00875934 | 0.08447192 |
| ADAMTS17 | 731.755755 | -1.0378369 | 0.00878086 | 0.08463309 |
| TMED7    | 1697.24227 | 0.40263344 | 0.00881687 | 0.08493357 |
| CCNB1    | 136.261762 | -0.8451117 | 0.00882867 | 0.08495422 |
| NAALADL2 | 138.503997 | 0.68015692 | 0.00882858 | 0.08495422 |
| FRA10AC1 | 187.08009  | 0.6010873  | 0.00887452 | 0.08526907 |
| PHACTR3  | 15.7575775 | -1.3109532 | 0.00887593 | 0.08526907 |
| ZC3H6    | 787.13698  | 0.52677322 | 0.00887457 | 0.08526907 |
| MSH4     | 24.374397  | 1.24713325 | 0.00889041 | 0.08536157 |
| RDM1     | 3.2391828  | -1.2834219 | 0.00889644 | 0.08537285 |
| DLGAP3   | 12.841439  | -0.8849434 | 0.00891796 | 0.08553264 |
| PVRL1    | 381.637036 | -0.7861457 | 0.00892347 | 0.0855389  |
| SLFN13   | 335.350902 | -0.8899567 | 0.00895245 | 0.08572321 |
| SORL1    | 3035.71862 | 1.06952883 | 0.00894893 | 0.08572321 |
| BSDC1    | 833.073056 | 0.42548249 | 0.00898319 | 0.08597082 |
| MCM7     | 750.278983 | -0.5111325 | 0.00899585 | 0.08599838 |
| SNX10    | 153.616538 | 0.64461621 | 0.00899103 | 0.08599838 |
| MRPL54   | 154.269287 | 0.49527471 | 0.00900599 | 0.08604853 |
| L3MBTL1  | 244.504355 | 0.54906386 | 0.00902569 | 0.08618995 |
| CTNND2   | 15.3003762 | -1.2736968 | 0.00903858 | 0.08621995 |
| MAOB     | 26.8689368 | -1.2610371 | 0.00904109 | 0.08621995 |
| SCUBE3   | 733.938635 | -0.84299   | 0.00904844 | 0.08621995 |
| TAGLN3   | 2.63950269 | -1.2435348 | 0.00904577 | 0.08621995 |
| DOCK2    | 694.728173 | 0.78603255 | 0.00905638 | 0.08624894 |

|            |            |            |            |            |
|------------|------------|------------|------------|------------|
| TJP3       | 44.0041609 | -1.1412179 | 0.00906359 | 0.08627088 |
| ISY1       | 125.436635 | 0.42532774 | 0.00912104 | 0.08677075 |
| GPR126     | 276.694093 | 0.97527771 | 0.00912793 | 0.08678937 |
| FADS1      | 1182.50756 | -0.9346054 | 0.00917333 | 0.0871739  |
| CIDCEP     | 50.5251633 | -0.5634377 | 0.00919046 | 0.08724239 |
| PFDN2      | 174.667901 | -0.4907102 | 0.00919001 | 0.08724239 |
| HERC2P7    | 47.1901979 | -0.5599004 | 0.00920351 | 0.0872675  |
| MSTN       | 17.8233495 | 0.93613515 | 0.00920799 | 0.0872675  |
| MYLK       | 1397.31815 | 1.18158923 | 0.00920298 | 0.0872675  |
| MAP3K8     | 296.915721 | 0.69428878 | 0.00922595 | 0.0873907  |
| TRUB2      | 283.000817 | -0.4761209 | 0.00923707 | 0.08744894 |
| HNRNPLL    | 545.387493 | 0.3874339  | 0.0092665  | 0.08763319 |
| MNT        | 458.385302 | -0.4362841 | 0.0092657  | 0.08763319 |
| CALB1      | 55.3802302 | -1.3372605 | 0.00928143 | 0.08768806 |
| CXorf30    | 10.8770499 | -1.3350675 | 0.00928985 | 0.08768806 |
| MRAP2      | 126.592335 | 1.3355561  | 0.00928929 | 0.08768806 |
| SAP30BP    | 909.955125 | -0.6214766 | 0.00929224 | 0.08768806 |
| GPNMB      | 1155.58777 | 1.06298916 | 0.00930545 | 0.08772684 |
| MSS51      | 92.1673805 | 0.66182436 | 0.00930633 | 0.08772684 |
| SLC6A9     | 68.5587588 | -0.9949846 | 0.00933148 | 0.08791684 |
| KLHDC1     | 149.047834 | 0.7065104  | 0.00935108 | 0.08803905 |
| LRMP       | 84.0325391 | 0.8398506  | 0.00935746 | 0.08803905 |
| ZBTB37     | 415.01171  | -0.3624504 | 0.00935947 | 0.08803905 |
| CATSPER2P1 | 25.023952  | -0.7792548 | 0.00942443 | 0.08855545 |
| SMIM14     | 642.774746 | 0.58541772 | 0.00942059 | 0.08855545 |
| CLPB       | 433.961787 | -0.4142103 | 0.00945875 | 0.08863486 |
| FEZ2       | 674.230142 | 0.37286401 | 0.00946299 | 0.08863486 |
| IARS       | 2597.69943 | -0.4533487 | 0.00944844 | 0.08863486 |
| PCDHB10    | 216.552312 | -0.9819181 | 0.00946312 | 0.08863486 |
| SCAND1     | 257.54916  | -0.4786299 | 0.00945834 | 0.08863486 |
| SEC22A     | 250.394982 | 0.27047855 | 0.00945783 | 0.08863486 |
| KCTD2      | 819.709457 | -0.4183544 | 0.00947872 | 0.08868653 |
| TFEC       | 243.715246 | 0.91099253 | 0.00947392 | 0.08868653 |
| HOXD13     | 11.2605109 | -1.2860945 | 0.00949335 | 0.08872902 |
| TRMT11     | 265.751446 | 0.51233345 | 0.009489   | 0.08872902 |
| EIF2B3     | 176.626493 | 0.59341514 | 0.00951491 | 0.08888328 |
| CRLF3      | 218.030425 | 0.50076702 | 0.00952796 | 0.08895793 |
| GADL1      | 5.35914178 | -1.3192235 | 0.00955342 | 0.08914836 |
| IGF2BP1    | 7.3617089  | -1.3316526 | 0.00957142 | 0.08922166 |
| TRPC6      | 35.7064511 | 1.0032315  | 0.00956891 | 0.08922166 |
| GALM       | 183.624667 | 0.85428911 | 0.00959267 | 0.08934899 |
| GUK1       | 1166.13852 | -0.4041806 | 0.00959524 | 0.08934899 |
| CYP4Z1     | 88.5680969 | 0.98522166 | 0.00962941 | 0.08957234 |
| TSGA10     | 86.8851414 | 0.72635449 | 0.00962545 | 0.08957234 |
| LACC1      | 207.000162 | 0.61782274 | 0.00963983 | 0.08962189 |
| ULK2       | 679.691497 | 0.42920502 | 0.00964632 | 0.08963488 |
| NRCAM      | 42.2055144 | -1.2105624 | 0.00965571 | 0.08967469 |
| RASA4B     | 26.1088889 | 0.62958016 | 0.00969269 | 0.08992323 |
| TMEM175    | 389.06708  | -0.4553691 | 0.00968797 | 0.08992323 |
| ZNF709     | 157.704013 | 0.70949104 | 0.00969943 | 0.08993829 |

|             |            |            |            |            |
|-------------|------------|------------|------------|------------|
| LINC00276   | 3.75064201 | 1.20784277 | 0.00972701 | 0.09014653 |
| DARS2       | 349.290839 | -0.6333252 | 0.00973936 | 0.09019509 |
| ZHX3        | 2578.78223 | 0.5797516  | 0.00974251 | 0.09019509 |
| GTF3C4      | 517.918237 | -0.3195609 | 0.00976933 | 0.09025341 |
| RPTOR       | 1110.45962 | -0.3836327 | 0.009767   | 0.09025341 |
| SLC27A4     | 359.198924 | -0.4238999 | 0.0097629  | 0.09025341 |
| SRRD        | 111.163421 | 0.42961768 | 0.00976278 | 0.09025341 |
| GPR174      | 4.62927119 | 1.10839929 | 0.00979358 | 0.09042996 |
| WDR83OS     | 586.177275 | 0.41441455 | 0.00982524 | 0.09067466 |
| DLGAP1-AS1  | 79.1493969 | 0.64305101 | 0.00983864 | 0.09069063 |
| HOGA1       | 117.589582 | 0.94548182 | 0.00984243 | 0.09069063 |
| RAB8B       | 1322.96586 | 0.6305523  | 0.00983366 | 0.09069063 |
| CASKIN2     | 703.627239 | -0.7805524 | 0.00985386 | 0.09074834 |
| CTD-2201118 | 13.0738831 | 1.25956502 | 0.00986941 | 0.09084402 |
| C20orf197   | 16.2091515 | 1.014425   | 0.00987761 | 0.09087192 |
| NT5C2       | 1885.4198  | 0.58278399 | 0.00990685 | 0.09109327 |
| INSRR       | 21.2773372 | -1.2275415 | 0.0099209  | 0.09113647 |
| SLC25A36    | 1329.03309 | -0.2130097 | 0.00992191 | 0.09113647 |
| GUSBP1      | 268.407154 | 0.44209335 | 0.009985   | 0.09166816 |
| ITGB1BP2    | 12.3987205 | 0.96962101 | 0.01000256 | 0.09168581 |
| NFAM1       | 131.597606 | 0.90117812 | 0.0099929  | 0.09168581 |
| WFIKKN2     | 33.596926  | -1.1810948 | 0.01000178 | 0.09168581 |
| CDK2        | 448.89343  | -0.5305259 | 0.01000805 | 0.09168834 |
| LOC283194   | 8.18574721 | 1.14573638 | 0.01004748 | 0.09192204 |
| SCYL1       | 1087.19291 | -0.3243741 | 0.01004924 | 0.09192204 |
| SLITRK6     | 107.481748 | -1.3187076 | 0.01004128 | 0.09192204 |
| RNF182      | 6.46914249 | -1.28002   | 0.01005986 | 0.09197139 |
| GABRB1      | 2.40867529 | -1.3185873 | 0.01007127 | 0.09202785 |
| NPHP3-ACAC  | 110.391161 | 0.59948344 | 0.01009371 | 0.09210961 |
| RBPM5       | 582.528367 | -0.6628947 | 0.01010028 | 0.09210961 |
| SGK494      | 177.807946 | -0.742496  | 0.01010116 | 0.09210961 |
| TRAPPC9     | 719.353097 | -0.3728201 | 0.01009847 | 0.09210961 |
| GRIK3       | 6.18211677 | -1.2867098 | 0.01013269 | 0.09230275 |
| MAP1S       | 412.22877  | -0.4313726 | 0.01013284 | 0.09230275 |
| FAM227B     | 42.0173594 | 0.55812735 | 0.01016208 | 0.09234712 |
| KLHDC3      | 930.972133 | 0.46675492 | 0.01016678 | 0.09234712 |
| SCAF1       | 897.905899 | -0.3778499 | 0.01014431 | 0.09234712 |
| SEPT9       | 1864.8579  | -0.6178233 | 0.01016643 | 0.09234712 |
| SFTPD       | 4.55890954 | 1.30052897 | 0.0101552  | 0.09234712 |
| WASH2P      | 228.707634 | 0.32184616 | 0.01016921 | 0.09234712 |
| CACTIN-AS1  | 3.269549   | 1.26311632 | 0.01017918 | 0.09238994 |
| MAT2A       | 2125.07196 | -0.2968164 | 0.0101917  | 0.0924559  |
| DOCK10      | 633.678268 | 0.81421739 | 0.01020821 | 0.09251025 |
| EHD2        | 2104.9211  | -0.6436983 | 0.01020537 | 0.09251025 |
| CPLX2       | 41.6759835 | -1.2843813 | 0.01023052 | 0.09266467 |
| LOC1009965  | 11.0636019 | -1.2925667 | 0.01024017 | 0.09270435 |
| DKFZp779M0  | 1.80227249 | 1.22945518 | 0.01029437 | 0.09295587 |
| GPR132      | 82.1197067 | 0.91900268 | 0.01029113 | 0.09295587 |
| INTS10      | 466.561986 | 0.44790115 | 0.01028452 | 0.09295587 |
| MIR497HG    | 92.2121759 | 1.17496674 | 0.01028143 | 0.09295587 |

|            |            |            |            |            |
|------------|------------|------------|------------|------------|
| SH2D5      | 2.13265296 | -1.2656291 | 0.01029332 | 0.09295587 |
| DUSP2      | 37.1178142 | 1.1913886  | 0.01032811 | 0.09318031 |
| WWP2       | 971.062957 | 0.49516715 | 0.01032982 | 0.09318031 |
| ATP5G1     | 339.783801 | -0.4016904 | 0.01035167 | 0.09332952 |
| SMU1       | 1213.1633  | 0.26118731 | 0.01036404 | 0.09339315 |
| ATP5D      | 483.65129  | -0.5771506 | 0.01037948 | 0.09346313 |
| PRRG3      | 11.2313071 | -1.3010998 | 0.01038243 | 0.09346313 |
| ZFP14      | 385.960028 | 0.48150248 | 0.01039122 | 0.09349439 |
| PKN3       | 138.442897 | -0.7911983 | 0.01040123 | 0.09353666 |
| AGBL3      | 22.839102  | 0.67526441 | 0.01041614 | 0.0935698  |
| BCL9       | 565.89901  | -0.56335   | 0.0104284  | 0.0935698  |
| COL8A1     | 4128.87281 | 1.2432255  | 0.01043422 | 0.0935698  |
| CTNNBIP1   | 286.493552 | 0.59969044 | 0.0104216  | 0.0935698  |
| FAM209B    | 1.62886279 | 1.18017663 | 0.01043684 | 0.0935698  |
| LCP1       | 865.873621 | 0.88846622 | 0.01041262 | 0.0935698  |
| NUTF2      | 663.141085 | -0.4457137 | 0.01048337 | 0.09393912 |
| SNORA37    | 14.9144109 | 0.84058316 | 0.01050237 | 0.09406141 |
| OMG        | 3.99499555 | -1.3152802 | 0.0105092  | 0.09407474 |
| STS        | 494.077123 | 0.92121554 | 0.01051701 | 0.09409678 |
| PRPS2      | 292.904714 | -0.336753  | 0.01054059 | 0.0942598  |
| P2RY2      | 8.5396683  | 1.06877948 | 0.0105563  | 0.09435231 |
| CMKLR1     | 753.210278 | -1.1717778 | 0.01056978 | 0.09436855 |
| FIBIN      | 2098.07476 | 1.2492112  | 0.01057958 | 0.09436855 |
| PPAP2B     | 1602.65214 | 1.0070891  | 0.01056862 | 0.09436855 |
| SMOC2      | 1104.65737 | 1.1645175  | 0.01057532 | 0.09436855 |
| CCNC       | 398.775093 | 0.50870935 | 0.01063712 | 0.09472702 |
| PBDC1      | 204.432539 | -0.4762585 | 0.0106355  | 0.09472702 |
| PTRH2      | 136.549145 | -0.5927044 | 0.01064131 | 0.09472702 |
| SRPX       | 118.385247 | 1.31232844 | 0.01063272 | 0.09472702 |
| LOC1005060 | 11.6996876 | 1.04176154 | 0.01065594 | 0.09480929 |
| FGD3       | 113.520507 | 0.84712199 | 0.01066276 | 0.09482201 |
| ANKRD12    | 2012.35097 | 0.53194202 | 0.01070228 | 0.09483787 |
| FOXO4      | 163.011566 | 0.66908949 | 0.01069999 | 0.09483787 |
| ITGAM      | 625.424429 | 0.90210399 | 0.01069544 | 0.09483787 |
| KLHL41     | 19.5811554 | 0.88142473 | 0.01068792 | 0.09483787 |
| LETM1      | 992.057375 | -0.4210587 | 0.01067469 | 0.09483787 |
| METTL1     | 90.4556564 | -0.5436944 | 0.01069129 | 0.09483787 |
| RCN3       | 344.239766 | 0.91686764 | 0.01069005 | 0.09483787 |
| ARPP21     | 2.48092624 | -1.3115684 | 0.01072889 | 0.09502572 |
| PPP6R1     | 983.591198 | -0.3698864 | 0.01076842 | 0.09532785 |
| ZNF420     | 191.940567 | 0.35822484 | 0.01079093 | 0.09547909 |
| C19orf24   | 168.987367 | -0.4160026 | 0.01081196 | 0.0956171  |
| ADAMTSL4-A | 90.6223746 | 0.76028893 | 0.01083475 | 0.09567432 |
| CCR5       | 60.1099779 | 0.99780015 | 0.01083251 | 0.09567432 |
| PITX1      | 44.8059028 | -1.2897383 | 0.01083356 | 0.09567432 |
| ANKAR      | 221.579737 | 0.48696999 | 0.01087701 | 0.09598508 |
| C7orf76    | 2.73281527 | 1.17219638 | 0.01088086 | 0.09598508 |
| APOB       | 143.79025  | 0.99439349 | 0.01089388 | 0.09605101 |
| KIF15      | 79.7250562 | -0.805695  | 0.01089925 | 0.09605101 |
| TUBB1      | 8.69275039 | 1.16033592 | 0.01091324 | 0.09612611 |



|           |            |            |            |            |
|-----------|------------|------------|------------|------------|
| BSCL2     | 98.8387233 | -0.4663892 | 0.01092855 | 0.09621277 |
| NLRP1     | 349.563795 | 0.85735851 | 0.01094438 | 0.09630394 |
| HMGCS1    | 911.000882 | -0.7204714 | 0.01096331 | 0.09642232 |
| SLC26A6   | 751.588407 | -0.9098107 | 0.01097726 | 0.09649676 |
| DPF2      | 650.231858 | -0.2585779 | 0.01099916 | 0.09664097 |
| NUDT12    | 333.710983 | 0.65790589 | 0.01101175 | 0.09670331 |
| ZNF319    | 216.828932 | -0.3919418 | 0.0110513  | 0.09700217 |
| KCNQ2     | 1.480978   | -1.2563217 | 0.01106445 | 0.09706917 |
| C6orf226  | 34.3841844 | -0.7510572 | 0.01110301 | 0.09735892 |
| METTL3    | 372.741443 | 0.48863607 | 0.01111155 | 0.09738526 |
| MRPS11    | 216.124956 | -0.4585369 | 0.01111714 | 0.09738567 |
| RPL9      | 4924.86024 | 0.41211927 | 0.01112541 | 0.09740963 |
| HSPA5     | 7500.83159 | -0.7360764 | 0.01115369 | 0.09756013 |
| SYT12     | 13.337844  | -1.2829697 | 0.01115133 | 0.09756013 |
| CGNL1     | 2553.76464 | 1.02449688 | 0.01116843 | 0.09759199 |
| NEK10     | 8.66049861 | 0.96918089 | 0.01116798 | 0.09759199 |
| MED8      | 228.707734 | 0.54505333 | 0.0111752  | 0.09760264 |
| LOC642423 | 2.2050648  | -1.113341  | 0.01120546 | 0.09781836 |
| PCYOX1L   | 165.946433 | -0.6661185 | 0.01122076 | 0.09785483 |
| PRPF3     | 910.366099 | -0.4682312 | 0.01121874 | 0.09785483 |
| GINS1     | 95.9678097 | -0.830902  | 0.01125066 | 0.09790827 |
| PPP1R14A  | 10.7156895 | -1.0851736 | 0.01124798 | 0.09790827 |
| PTPRM     | 2645.52257 | 0.60985929 | 0.01126029 | 0.09790827 |
| S100A10   | 3848.74361 | -0.5949333 | 0.01125241 | 0.09790827 |
| SLC7A5    | 379.476834 | -1.1028454 | 0.01125667 | 0.09790827 |
| ZRANB2    | 1238.77489 | 0.39719814 | 0.01124086 | 0.09790827 |
| DNAH9     | 33.5780757 | 1.01605752 | 0.01127773 | 0.09801146 |
| SLC29A2   | 16.2635598 | -1.2130864 | 0.01131126 | 0.09820585 |
| TMEM232   | 33.1005057 | 0.81704389 | 0.01130746 | 0.09820585 |
| ABI2      | 1589.28727 | -0.2600054 | 0.011365   | 0.09842849 |
| DDX42     | 2325.93893 | -0.2630001 | 0.0113579  | 0.09842849 |
| FAM182A   | 4.24978078 | 1.28575251 | 0.01135063 | 0.09842849 |
| SETDB1    | 846.87377  | -0.3441052 | 0.01137048 | 0.09842849 |
| TP63      | 855.707961 | -1.2487262 | 0.0113567  | 0.09842849 |
| USP24     | 2333.569   | 0.44688153 | 0.01136918 | 0.09842849 |
| ALG14     | 67.0363986 | 0.61239694 | 0.01139107 | 0.09855823 |
| PURA      | 1305.10431 | 0.4753986  | 0.0114063  | 0.09864152 |
| LRPPRC    | 2367.36386 | -0.4401944 | 0.01142262 | 0.09868564 |
| SLC35F1   | 8.11396146 | -1.2337157 | 0.01141818 | 0.09868564 |
| ALMS1P    | 4.22355277 | 1.07876514 | 0.01143995 | 0.09869065 |
| C16orf13  | 276.987338 | -0.4670433 | 0.01143106 | 0.09869065 |
| GRB7      | 15.2770871 | -1.0920194 | 0.01144565 | 0.09869065 |
| PRKG1     | 379.097124 | 1.01973672 | 0.0114456  | 0.09869065 |
| PARK2     | 87.986768  | 0.69044471 | 0.01146914 | 0.09884474 |
| SUGP1     | 339.47792  | -0.2726939 | 0.01147712 | 0.09886512 |
| KRTCAP2   | 643.855049 | -0.4516948 | 0.01150059 | 0.09901879 |
| EDN1      | 38.6798321 | 1.02343008 | 0.01151264 | 0.09902557 |
| SNORA10   | 8.4224426  | -1.0151493 | 0.01151161 | 0.09902557 |
| CLYBL     | 87.9650955 | -0.5450727 | 0.01152859 | 0.09911436 |
| BRPF1     | 373.678976 | -0.3768595 | 0.01155155 | 0.09926323 |

|            |            |            |            |            |
|------------|------------|------------|------------|------------|
| TP53       | 759.585356 | -0.477851  | 0.01158129 | 0.09947017 |
| CTXN1      | 53.6242678 | -1.0128276 | 0.01159226 | 0.0995158  |
| LMBRD1     | 803.698176 | 0.62951337 | 0.01161732 | 0.0996378  |
| MANEA      | 410.497381 | 0.65990363 | 0.0116178  | 0.0996378  |
| TSSC4      | 207.600728 | 0.41448553 | 0.01163209 | 0.09971172 |
| ANK3       | 543.83447  | 1.02748273 | 0.01167264 | 0.10001058 |
| HS3ST2     | 1.35087474 | -1.2867445 | 0.01169271 | 0.10003639 |
| LDB1       | 1146.34633 | -0.495794  | 0.01168734 | 0.10003639 |
| TP53INP2   | 980.326758 | -0.7036812 | 0.01168272 | 0.10003639 |
| C16orf86   | 30.0215993 | 1.05668027 | 0.01172378 | 0.10010743 |
| CRHR1      | 2.40582086 | 1.28750912 | 0.0117128  | 0.10010743 |
| DAAM1      | 407.477678 | 0.71983906 | 0.01172082 | 0.10010743 |
| SP4        | 268.044704 | 0.48340013 | 0.01172206 | 0.10010743 |
| TRIM7      | 24.2590231 | 1.01776631 | 0.01177229 | 0.10047283 |
| DMXL1      | 2253.31708 | 0.4510443  | 0.01179167 | 0.1005728  |
| MYBPC1     | 2.98903073 | 1.28358317 | 0.01179543 | 0.1005728  |
| SLED1      | 21.6166102 | 1.05589575 | 0.01181547 | 0.1006948  |
| CD3G       | 4.97961134 | 1.1703156  | 0.01182555 | 0.10073196 |
| GYS1       | 1080.65506 | -0.478583  | 0.01185708 | 0.1008714  |
| PRNP       | 1967.47208 | 0.49008355 | 0.01185913 | 0.1008714  |
| SLC29A4    | 41.2254333 | -1.1315046 | 0.01185871 | 0.1008714  |
| SCUBE2     | 48.0387352 | 1.08537123 | 0.01187641 | 0.10096956 |
| C2orf15    | 15.9640901 | -0.8641079 | 0.01190111 | 0.10108185 |
| ZNF695     | 10.3276014 | -1.1379469 | 0.01189966 | 0.10108185 |
| HLF        | 3390.13925 | 0.71121899 | 0.01192658 | 0.10124929 |
| NOL11      | 556.46959  | -0.3417932 | 0.01194754 | 0.10137833 |
| LSM12      | 249.763551 | -0.4439958 | 0.01197356 | 0.10155011 |
| ITIH3      | 12.8339221 | 1.25339661 | 0.01198096 | 0.1015639  |
| PCDHB16    | 596.64816  | -1.0148205 | 0.01199704 | 0.10165119 |
| DNAJB4     | 483.055656 | 0.76837785 | 0.01202347 | 0.10174715 |
| MARCH1     | 346.371791 | 0.84089245 | 0.01202572 | 0.10174715 |
| TBC1D10C   | 18.7998992 | 0.98745078 | 0.01202548 | 0.10174715 |
| POTEJ      | 27.7853301 | -0.7765977 | 0.01204081 | 0.10182589 |
| MFGE8      | 727.972092 | 0.9082871  | 0.01208736 | 0.1021704  |
| RASSF7     | 328.126049 | -0.7837914 | 0.01209778 | 0.10220942 |
| C11orf44   | 2.81487725 | 1.2871382  | 0.01211221 | 0.10228214 |
| HCFC1      | 2397.99007 | -0.3282641 | 0.01215039 | 0.10245703 |
| ICA1L      | 259.718095 | 0.72596262 | 0.01214458 | 0.10245703 |
| UBLCP1     | 419.857303 | 0.22117043 | 0.01213912 | 0.10245703 |
| ETV3       | 272.971867 | -0.3550517 | 0.0121669  | 0.1024992  |
| ZNF574     | 263.834691 | -0.3284222 | 0.01216705 | 0.1024992  |
| MIR181A1HG | 57.4126577 | -0.7753829 | 0.01219421 | 0.10267883 |
| COQ3       | 31.8957607 | 0.54423003 | 0.01220879 | 0.10273971 |
| SAMD3      | 6.12312816 | 1.12609853 | 0.01221312 | 0.10273971 |
| ASPG       | 6.72131176 | 1.24148216 | 0.01225076 | 0.10297197 |
| DTX1       | 3.29223566 | -1.2478831 | 0.01225243 | 0.10297197 |
| SNHG10     | 65.8140844 | 0.51460863 | 0.01233001 | 0.103525   |
| ZYG11B     | 1282.47491 | 0.49900043 | 0.01232704 | 0.103525   |
| LOC442028  | 35.3632189 | -1.2288942 | 0.01233605 | 0.10352631 |
| ADSS       | 650.687267 | -0.3595628 | 0.01234731 | 0.1035714  |

|            |            |            |            |            |
|------------|------------|------------|------------|------------|
| HIST1H3I   | 77.6256111 | -0.9198371 | 0.01236383 | 0.10366053 |
| CCDC124    | 301.113209 | -0.5010763 | 0.01239035 | 0.10383339 |
| GZMM       | 1.97633887 | 1.22489555 | 0.01243837 | 0.10413654 |
| NOP14      | 613.04987  | -0.3684622 | 0.01243595 | 0.10413654 |
| FAM65A     | 824.952635 | -0.3765384 | 0.01245505 | 0.10421816 |
| HIST1H4I   | 26.5851307 | 0.93280888 | 0.01246887 | 0.10421816 |
| LOC1019270 | 3.82614715 | 1.16747416 | 0.01246103 | 0.10421816 |
| NFIA       | 4419.28123 | 0.50548368 | 0.01247182 | 0.10421816 |
| NEIL3      | 17.8882922 | -0.903145  | 0.01251124 | 0.104498   |
| EIF4G1     | 5206.83667 | -0.3152885 | 0.01253735 | 0.10466631 |
| DHCR24     | 1192.26893 | -0.9644255 | 0.01257492 | 0.1049302  |
| TFAP4      | 86.2441319 | -0.750607  | 0.01260075 | 0.10509587 |
| PLSCR4     | 811.872572 | 0.71338444 | 0.01260844 | 0.1051102  |
| DLGAP4     | 1264.97398 | -0.6463967 | 0.01262056 | 0.10513613 |
| GRM7       | 36.0323409 | -1.2777433 | 0.01265067 | 0.10513613 |
| LRRC8C     | 1232.74403 | 0.62961715 | 0.01264673 | 0.10513613 |
| MAP3K11    | 638.443469 | -0.4402532 | 0.01263805 | 0.10513613 |
| PABPC3     | 23.6396158 | -0.9476277 | 0.0126454  | 0.10513613 |
| SLC25A33   | 44.6416468 | 0.67550271 | 0.01265339 | 0.10513613 |
| WDSUB1     | 176.775913 | -0.4151742 | 0.01265113 | 0.10513613 |
| LRRC69     | 9.66141907 | 0.84703124 | 0.01266579 | 0.10518738 |
| TSPAN2     | 22.2643151 | -1.2022264 | 0.01267152 | 0.10518738 |
| SERTM1     | 144.6982   | 1.2793928  | 0.01268587 | 0.10525678 |
| ARAP3      | 170.45605  | 0.79681192 | 0.01279063 | 0.10583365 |
| CNPY4      | 286.323915 | 0.54291907 | 0.01277342 | 0.10583365 |
| DNPEP      | 408.096581 | -0.3690933 | 0.01278053 | 0.10583365 |
| FGD2       | 320.285714 | 0.8365301  | 0.01277909 | 0.10583365 |
| GTF2B      | 182.754677 | 0.50492289 | 0.01279149 | 0.10583365 |
| SEZ6       | 3.03019801 | -1.2206748 | 0.01276813 | 0.10583365 |
| ELF4       | 587.184075 | -0.5203067 | 0.01279999 | 0.10585415 |
| FASTKD1    | 281.999901 | -0.5247002 | 0.01281169 | 0.10590117 |
| COL7A1     | 365.299018 | -0.8526574 | 0.01282375 | 0.10595107 |
| IFI44      | 262.317596 | 0.65124767 | 0.01284766 | 0.10609872 |
| ZNF277     | 284.021546 | 0.35304326 | 0.01285398 | 0.10610111 |
| PHLDB1     | 2459.67734 | -0.4398601 | 0.01287025 | 0.10618556 |
| CPNE5      | 66.3061028 | 1.12831964 | 0.01288321 | 0.10624267 |
| FADD       | 210.472432 | -0.3992807 | 0.01289751 | 0.10631074 |
| CFL1       | 3643.69941 | -0.3459104 | 0.01291184 | 0.10637904 |
| IBTK       | 1418.76264 | 0.39605733 | 0.01293373 | 0.10640987 |
| NCOA6      | 1411.61294 | -0.4227224 | 0.01293071 | 0.10640987 |
| SCNN1D     | 81.0540113 | 0.80531716 | 0.01292485 | 0.10640987 |
| CDPF1      | 63.1080039 | 0.48757096 | 0.01295794 | 0.10655918 |
| NUFIP2     | 4546.82794 | -0.2951646 | 0.01296923 | 0.10660219 |
| LEPR       | 16039.4928 | 1.13460274 | 0.01298873 | 0.1067126  |
| LOC220729  | 418.006234 | -0.4598756 | 0.013003   | 0.10678005 |
| CLK4       | 431.552046 | 0.50422898 | 0.01302049 | 0.10687376 |
| ATAD5      | 155.22906  | -0.6035711 | 0.0130446  | 0.10699725 |
| P4HA2      | 1000.45007 | 0.6982131  | 0.0130477  | 0.10699725 |
| FAM26E     | 321.117952 | 0.81058838 | 0.01308124 | 0.10718751 |
| KRT16      | 37.4048571 | -1.2735752 | 0.0130873  | 0.10718751 |

|           |            |            |            |            |
|-----------|------------|------------|------------|------------|
| YDJC      | 63.6388203 | -0.6138884 | 0.01308919 | 0.10718751 |
| KLHL31    | 27.6874593 | 0.88158593 | 0.01309676 | 0.10719961 |
| VAV2      | 510.529355 | -0.6368231 | 0.01312396 | 0.10737234 |
| ACAP1     | 26.7086243 | 0.8503598  | 0.01314126 | 0.107376   |
| FGF12     | 42.0837238 | 1.02709781 | 0.01314579 | 0.107376   |
| SPATA17   | 12.9576386 | -0.8726605 | 0.01314778 | 0.107376   |
| SSR4P1    | 19.7276751 | 0.94019903 | 0.01314883 | 0.107376   |
| PPP1R7    | 464.955348 | -0.4237314 | 0.01316284 | 0.1074405  |
| COMMD3    | 136.750367 | 0.46489079 | 0.01316996 | 0.10744881 |
| FAM102B   | 404.871321 | 0.63820167 | 0.01319523 | 0.10760504 |
| KLHL29    | 1076.55604 | -1.102008  | 0.01320448 | 0.10763055 |
| KIF13A    | 1442.11856 | 0.51628006 | 0.0132211  | 0.10771613 |
| ISPD      | 63.8734177 | 0.67941747 | 0.01323969 | 0.10781765 |
| LOC286437 | 161.089393 | 0.4419421  | 0.01325314 | 0.10786094 |
| PIGO      | 582.605954 | -0.363892  | 0.01325727 | 0.10786094 |
| ALG1L9P   | 26.0601467 | 0.70938526 | 0.01328895 | 0.10806875 |
| ARHGFE2   | 1787.99027 | -0.4616076 | 0.01329562 | 0.10807277 |
| SBNO1     | 2033.24934 | -0.2988044 | 0.01330174 | 0.10807277 |
| NSUN5P2   | 159.901143 | 0.58077033 | 0.01332369 | 0.10815455 |
| TACR2     | 1.66965866 | 1.26210807 | 0.0133241  | 0.10815455 |
| AARS      | 2290.84621 | -0.5328307 | 0.01337678 | 0.10842956 |
| CALN1     | 4.61157744 | -1.1921107 | 0.01340257 | 0.10842956 |
| NUDT9P1   | 11.4315562 | 1.02128096 | 0.01338204 | 0.10842956 |
| OR6W1P    | 2.30199508 | -1.1913464 | 0.01340391 | 0.10842956 |
| SENCR     | 3.33791416 | 1.02508474 | 0.01340149 | 0.10842956 |
| TBC1D19   | 341.360064 | 0.47599534 | 0.01336694 | 0.10842956 |
| TRIB1     | 316.84525  | 0.87521678 | 0.01339525 | 0.10842956 |
| TRIM61    | 26.4017129 | 0.58737515 | 0.01340729 | 0.10842956 |
| CAPS2     | 93.2605738 | 0.60842412 | 0.01344028 | 0.10864638 |
| CMTR1     | 781.961744 | 0.35645332 | 0.01346857 | 0.10868801 |
| HNRNPD    | 1190.59673 | -0.497393  | 0.01346426 | 0.10868801 |
| PIEZO1    | 4006.42399 | -0.5267762 | 0.01347015 | 0.10868801 |
| VNN1      | 30.2810876 | 0.89516411 | 0.01346124 | 0.10868801 |
| ABC4      | 33.5559559 | 0.84911103 | 0.01351035 | 0.10886256 |
| ACTG1     | 28071.0994 | -0.4047729 | 0.01350929 | 0.10886256 |
| ATP10B    | 3.48652456 | -1.2419752 | 0.01350496 | 0.10886256 |
| TRAT1     | 3.62481835 | 1.16882959 | 0.01352039 | 0.1088936  |
| HN1L      | 980.212124 | -0.4786807 | 0.01352702 | 0.10889714 |
| ERCC3     | 715.168043 | -0.2640257 | 0.01356048 | 0.10907656 |
| SGOL2     | 138.272914 | -0.6594302 | 0.01356171 | 0.10907656 |
| CLEC12A   | 14.9363494 | 1.20218421 | 0.01356905 | 0.10908571 |
| SLC25A45  | 134.808263 | 0.68694282 | 0.0136117  | 0.10937865 |
| CEP162    | 260.994242 | 0.63611098 | 0.01362159 | 0.10940809 |
| ZNF426    | 374.97793  | 0.45002124 | 0.01367317 | 0.10977226 |
| ZBTB48    | 161.551934 | 0.47811598 | 0.01380871 | 0.1108099  |
| MED25     | 355.553707 | -0.3306966 | 0.01388499 | 0.11132039 |
| METTL13   | 375.697317 | -0.3695798 | 0.01388329 | 0.11132039 |
| TPM1      | 3502.53893 | 0.65335459 | 0.01390644 | 0.11144157 |
| EDAR      | 6.26220872 | -1.2642539 | 0.01391534 | 0.11146211 |
| HDLBP     | 9996.57967 | -0.3889842 | 0.01393159 | 0.11154149 |

|            |            |            |            |            |
|------------|------------|------------|------------|------------|
| CDH6       | 245.365006 | 1.08569767 | 0.01393877 | 0.11154824 |
| GIMAP2     | 96.5844368 | 0.70358902 | 0.01394906 | 0.1115798  |
| ERP44      | 989.139389 | -0.2541882 | 0.01395699 | 0.11159244 |
| FAM87A     | 1.36964824 | 1.22229525 | 0.01398304 | 0.11174994 |
| ANKRD23    | 96.9699113 | -0.4573199 | 0.01400513 | 0.11187569 |
| KLK14      | 1.46445187 | -1.261703  | 0.01401651 | 0.11190972 |
| RORB       | 1.72614072 | -1.2416578 | 0.01402212 | 0.11190972 |
| CYP1B1-AS1 | 28.4272791 | 1.1006298  | 0.0140299  | 0.11192104 |
| C10orf131  | 6.36538291 | 1.03689831 | 0.01406573 | 0.112156   |
| RPL34      | 2927.86885 | 0.45906791 | 0.01408742 | 0.11222726 |
| TLR8       | 52.1214509 | 0.96806396 | 0.01408537 | 0.11222726 |
| GCSH       | 117.674334 | -0.6205266 | 0.01410353 | 0.11227955 |
| URB2       | 330.71244  | -0.4310364 | 0.01410675 | 0.11227955 |
| MAP3K9     | 181.077898 | -0.6856005 | 0.01413311 | 0.11243843 |
| CCDC147    | 6.53309278 | 1.05180332 | 0.01415059 | 0.11252659 |
| MROH9      | 2.49677848 | 1.18217481 | 0.01415795 | 0.11253423 |
| SKAP2      | 461.680458 | 0.67906221 | 0.01418526 | 0.1127004  |
| EML1       | 271.134284 | 0.67811396 | 0.01420917 | 0.11283577 |
| QPCT       | 31.5268386 | 1.04707726 | 0.01421513 | 0.11283577 |
| DLEC1      | 99.105556  | 1.00218891 | 0.01422494 | 0.112838   |
| PLEKHF2    | 183.095843 | 0.35442768 | 0.01423111 | 0.112838   |
| TTBK1      | 6.62494902 | -1.1098188 | 0.01423465 | 0.112838   |
| HAPLN1     | 33.6846411 | -1.256739  | 0.01427339 | 0.11304322 |
| KRT10      | 239.435949 | -0.5994697 | 0.01426991 | 0.11304322 |
| SPTA1      | 3.49769645 | 1.10758314 | 0.01430062 | 0.1132079  |
| CALCR      | 7.88014651 | 1.07772408 | 0.01431933 | 0.11330502 |
| NPEPPS     | 1718.17291 | -0.3674811 | 0.01433327 | 0.1133643  |
| CENPM      | 13.810056  | -0.9488749 | 0.01434784 | 0.11342854 |
| GPS1       | 1089.80612 | -0.2803623 | 0.01436639 | 0.11347321 |
| LPHN3      | 344.615058 | -1.2438929 | 0.01436012 | 0.11347321 |
| KIF22      | 255.348288 | -0.4725856 | 0.01439998 | 0.11363647 |
| PAM        | 4232.58511 | 0.74480046 | 0.01439857 | 0.11363647 |
| GMFG       | 80.4834946 | 0.71777067 | 0.01444567 | 0.11394589 |
| EPPK1      | 1044.10875 | -1.1441464 | 0.01446805 | 0.11399198 |
| FH         | 549.138878 | -0.4871053 | 0.01448585 | 0.11399198 |
| LINC-PINT  | 667.322094 | 0.5732055  | 0.01447162 | 0.11399198 |
| NFE2L2     | 2518.82983 | -0.499303  | 0.01448204 | 0.11399198 |
| NSFP1      | 3.43982201 | -0.9148012 | 0.01446539 | 0.11399198 |
| ST14       | 48.1829963 | -0.850542  | 0.0144904  | 0.11399198 |
| DLEU2L     | 26.6992043 | 0.76997037 | 0.01451847 | 0.11416177 |
| GRIA4      | 3.01412661 | -1.2377456 | 0.01454361 | 0.11430837 |
| C9orf156   | 161.664825 | 0.29780757 | 0.01459967 | 0.11464655 |
| HSPB7      | 60.3476868 | 0.88817731 | 0.0145934  | 0.11464655 |
| B4GALNT3   | 20.222208  | 0.84579361 | 0.01464162 | 0.11487337 |
| SCARA3     | 4333.17705 | -0.7601584 | 0.01464162 | 0.11487337 |
| CD82       | 161.514609 | -0.9015279 | 0.01467058 | 0.11487355 |
| GNAI1      | 239.946798 | -0.7046352 | 0.01466788 | 0.11487355 |
| LINC00689  | 13.4211027 | -1.2530618 | 0.01467425 | 0.11487355 |
| P2RX1      | 7.26811683 | 1.10016983 | 0.01465516 | 0.11487355 |
| UBE2Q2P2   | 4.64547338 | -1.0373413 | 0.0146743  | 0.11487355 |

|            |            |            |            |            |
|------------|------------|------------|------------|------------|
| ZNF688     | 110.35104  | 0.43363575 | 0.01470263 | 0.11504413 |
| SNORA28    | 3.81580568 | 0.93418142 | 0.01471232 | 0.11506879 |
| CDK18      | 215.987998 | -0.7865878 | 0.01471922 | 0.11507155 |
| GDF15      | 164.41552  | -1.1582479 | 0.01473675 | 0.11514394 |
| LINC00174  | 207.434769 | -0.6082702 | 0.01474157 | 0.11514394 |
| ADC        | 65.4148393 | 0.70893746 | 0.01477488 | 0.11519647 |
| DPEP1      | 8.27426572 | -1.2513772 | 0.01477511 | 0.11519647 |
| HIP1       | 805.513726 | 0.60782814 | 0.01476142 | 0.11519647 |
| LINC00861  | 7.75879575 | 0.93080005 | 0.01478104 | 0.11519647 |
| LOC1002881 | 13.0298617 | -1.1310317 | 0.01476097 | 0.11519647 |
| SHOX2      | 39.6118835 | -1.2270117 | 0.01480599 | 0.11533983 |
| C5orf27    | 1.67760537 | 1.25142983 | 0.01483306 | 0.11549209 |
| EIF3D      | 1099.14014 | 0.42050089 | 0.01483867 | 0.11549209 |
| FCGR2A     | 1078.17494 | 0.65380444 | 0.01484823 | 0.1155154  |
| KMO        | 18.1280246 | 0.91558832 | 0.01485721 | 0.11553418 |
| CNDP1      | 4.0325359  | -1.2489277 | 0.01486933 | 0.1155773  |
| LOC1019270 | 15.0884918 | -1.2519334 | 0.01487663 | 0.11558301 |
| AP2M1      | 3356.31939 | -0.2196964 | 0.01490216 | 0.1156848  |
| PATL1      | 660.856971 | -0.4290482 | 0.01490289 | 0.1156848  |
| GATAD2A    | 1009.48143 | -0.4256562 | 0.01491746 | 0.11574682 |
| HERC1      | 4893.26257 | 0.34731317 | 0.01493665 | 0.11584463 |
| COMMD2     | 617.795885 | 0.39798514 | 0.01498969 | 0.11594924 |
| HADH       | 363.647013 | -0.3545237 | 0.01497118 | 0.11594924 |
| KIAA0247   | 3173.48115 | 0.64113004 | 0.01498406 | 0.11594924 |
| MVD        | 250.582196 | -0.5977959 | 0.01495853 | 0.11594924 |
| ORC1       | 18.5123793 | -0.8136361 | 0.01497827 | 0.11594924 |
| SLC2A9     | 79.6319762 | 0.7763519  | 0.0149687  | 0.11594924 |
| LST1       | 1.76775754 | 1.20736856 | 0.01501892 | 0.11612434 |
| HEXB       | 1279.61824 | 0.4233278  | 0.01504467 | 0.11627226 |
| ZFHx4      | 1145.46462 | -0.7391326 | 0.01505264 | 0.11628277 |
| CENPO      | 214.892978 | -0.5410062 | 0.01511055 | 0.11637239 |
| FBXO4      | 125.386928 | 0.53076369 | 0.01508524 | 0.11637239 |
| NDUFA3     | 505.62272  | -0.4214873 | 0.01509958 | 0.11637239 |
| NEXN-AS1   | 9.78814837 | 1.03708387 | 0.01508712 | 0.11637239 |
| OR51B5     | 16.1320698 | 0.88862884 | 0.01509674 | 0.11637239 |
| SNORA61    | 5.16213449 | 0.92126932 | 0.01508004 | 0.11637239 |
| TOB2P1     | 11.9596795 | -1.0238819 | 0.01511023 | 0.11637239 |
| BOLA3      | 83.2231494 | -0.6109069 | 0.0151504  | 0.11656509 |
| LRRTM4     | 2.64830568 | -1.1853234 | 0.01515036 | 0.11656509 |
| NEAT1      | 26129.2731 | -0.6752856 | 0.01515545 | 0.11656509 |
| STAC2      | 11.1911642 | -1.1948699 | 0.01519301 | 0.11680288 |
| PCDHB9     | 275.324177 | -1.0218514 | 0.01521147 | 0.11689371 |
| IL6R       | 365.900702 | 0.78521929 | 0.015224   | 0.11693897 |
| EIF3L      | 2280.59498 | 0.52554215 | 0.0152325  | 0.11695319 |
| STAT5B     | 1202.18454 | 0.39699136 | 0.01524179 | 0.1169734  |
| CCDC78     | 21.5450788 | -0.876187  | 0.01525624 | 0.11703231 |
| GSE1       | 1012.73337 | -0.5985577 | 0.01526568 | 0.11703231 |
| RPGRIP1    | 9.03574265 | 1.06270198 | 0.01526942 | 0.11703231 |
| LOC1001323 | 48.0001957 | 0.65234671 | 0.01529215 | 0.11715544 |
| MBD6       | 885.865038 | -0.4156389 | 0.01531403 | 0.11722099 |

|            |            |            |            |            |
|------------|------------|------------|------------|------------|
| SDHAP1     | 516.954413 | -0.5441823 | 0.01531199 | 0.11722099 |
| ABCB9      | 53.0105083 | -0.4793778 | 0.0153484  | 0.11738187 |
| ALYREF     | 335.493172 | -0.3851224 | 0.01534423 | 0.11738187 |
| ASS1       | 3224.6212  | -0.715687  | 0.01536764 | 0.11747796 |
| TSPAN17    | 343.78064  | -0.5015222 | 0.01537627 | 0.11749288 |
| BHMT       | 19.2833342 | 1.18855637 | 0.01543597 | 0.1175699  |
| FAM45B     | 11.471693  | 0.64023592 | 0.01543366 | 0.1175699  |
| GNAI3      | 780.379574 | 0.4646368  | 0.01541985 | 0.1175699  |
| MYO5C      | 931.810147 | -0.7295759 | 0.01540797 | 0.1175699  |
| POMGNT2    | 337.035203 | 0.53365382 | 0.01540488 | 0.1175699  |
| SENP6      | 1919.43057 | 0.46122914 | 0.015402   | 0.1175699  |
| SLC25A23   | 1470.81556 | -0.5247997 | 0.0154375  | 0.1175699  |
| ZNF818P    | 200.625646 | 0.62610235 | 0.01543982 | 0.1175699  |
| SIRT1      | 480.543898 | 0.41353023 | 0.01544813 | 0.11758228 |
| ALB        | 8.74818323 | 1.13081647 | 0.01545643 | 0.11759453 |
| ACKR2      | 27.0028024 | 1.0437618  | 0.01546506 | 0.11760932 |
| FAM76A     | 152.107249 | 0.6168431  | 0.01549834 | 0.1178115  |
| CAPN1      | 1541.65555 | -0.384699  | 0.01551548 | 0.11785399 |
| NTRK1      | 3.05237524 | -1.0691841 | 0.01551846 | 0.11785399 |
| ZNHIT6     | 297.32681  | 0.35530311 | 0.01552403 | 0.11785399 |
| FBN2       | 3232.61463 | -0.9343474 | 0.01553566 | 0.11789138 |
| IFI6       | 632.30995  | 0.61240891 | 0.01556862 | 0.11809056 |
| C21orf58   | 84.5822832 | -0.618608  | 0.01559978 | 0.11817401 |
| NLRC4      | 45.3060286 | 0.81107778 | 0.01559726 | 0.11817401 |
| TNS3       | 2647.4907  | 0.90044845 | 0.01559559 | 0.11817401 |
| MGC16142   | 15.1843735 | 0.70266208 | 0.01560998 | 0.11820044 |
| CIRH1A     | 367.855348 | -0.5182217 | 0.01563128 | 0.11826449 |
| UNC5A      | 3.65386196 | -1.1910224 | 0.01563189 | 0.11826449 |
| HAUS1      | 145.935206 | 0.57528165 | 0.0156413  | 0.11828484 |
| LOC1005066 | 34.7666024 | 0.81821277 | 0.01571489 | 0.11873921 |
| LOC90784   | 292.880447 | -0.6566639 | 0.01571201 | 0.11873921 |
| TMIE       | 3.14981364 | 1.12748332 | 0.015738   | 0.11883176 |
| UQCRC1     | 1280.10662 | -0.6087974 | 0.01574065 | 0.11883176 |
| RCAN1      | 488.134875 | 0.52190799 | 0.01576936 | 0.11899745 |
| AKAP3      | 10.1838475 | 0.97101711 | 0.01579433 | 0.1191348  |
| MICU3      | 149.599626 | 0.60431486 | 0.01580231 | 0.11914386 |
| GPC1       | 1224.94355 | -0.7739876 | 0.01583764 | 0.11935911 |
| C19orf66   | 328.962652 | 0.37682422 | 0.01586862 | 0.11951035 |
| MIR155HG   | 22.1874183 | 0.98507548 | 0.0158713  | 0.11951035 |
| CCL19      | 2.39818569 | 1.21944974 | 0.01588628 | 0.11957198 |
| STAM2      | 993.125854 | 0.23640949 | 0.01589878 | 0.11961488 |
| DKFZp451B0 | 1.60015866 | 1.21888732 | 0.0159251  | 0.11964679 |
| NOTCH2NL   | 1708.84794 | 0.41704837 | 0.01591843 | 0.11964679 |
| SHPK       | 400.874133 | -0.4312795 | 0.01593023 | 0.11964679 |
| ZIC1       | 3995.73948 | -1.0414894 | 0.01592862 | 0.11964679 |
| ZBTB21     | 603.855811 | 0.60100489 | 0.01595503 | 0.11978186 |
| CHST1      | 56.6912046 | 0.81519604 | 0.0159734  | 0.11981757 |
| DDN        | 5.32317992 | -1.1695367 | 0.01597289 | 0.11981757 |
| CCDC22     | 153.349388 | 0.28785008 | 0.01602175 | 0.11987348 |
| CCDC28B    | 31.8521422 | -0.6362662 | 0.01600252 | 0.11987348 |

|           |            |            |            |            |
|-----------|------------|------------|------------|------------|
| GNG3      | 2.10186931 | -1.2343705 | 0.01601898 | 0.11987348 |
| KRT4      | 30.2846316 | -1.184534  | 0.01600423 | 0.11987348 |
| LINC00412 | 9.67884405 | 0.76765392 | 0.01600286 | 0.11987348 |
| NFIL3     | 248.73075  | 0.96236282 | 0.01601567 | 0.11987348 |
| ERG       | 192.599458 | 0.89829293 | 0.01605228 | 0.12005083 |
| HSCB      | 40.5497933 | 0.46819328 | 0.01606245 | 0.12007589 |
| CHPT1     | 395.886944 | 0.67788495 | 0.01610232 | 0.12029546 |
| UNK       | 791.942592 | -0.4122597 | 0.0161055  | 0.12029546 |
| RNF175    | 5.58120153 | 1.22046635 | 0.0161453  | 0.12043931 |
| SLC31A1   | 676.795471 | -0.5218087 | 0.0161333  | 0.12043931 |
| VSIG1     | 8.95449544 | -1.075749  | 0.0161402  | 0.12043931 |
| ADAM10    | 2090.079   | -0.3615527 | 0.01615877 | 0.12048364 |
| LYRM2     | 554.831832 | 0.60493979 | 0.01616495 | 0.12048364 |
| LOC284023 | 55.811801  | 0.5431662  | 0.01619259 | 0.12058747 |
| RRS1-AS1  | 323.45794  | -0.783172  | 0.01619001 | 0.12058747 |
| PNKD      | 506.444471 | -0.5016499 | 0.0162513  | 0.12097352 |
| KLK10     | 93.2887591 | -1.1222467 | 0.01627154 | 0.12107289 |
| ANKRD13C  | 534.644614 | 0.4366514  | 0.01628282 | 0.1211056  |
| GRTP1     | 91.3843747 | -0.6373269 | 0.01630718 | 0.12118431 |
| PINLYP    | 77.5818182 | -0.4411063 | 0.01630485 | 0.12118431 |
| TXNL4B    | 125.012111 | 0.6885896  | 0.01635273 | 0.12142679 |
| ZRANB1    | 1042.66994 | 0.35995898 | 0.01635361 | 0.12142679 |
| LDLRAP1   | 564.082293 | 0.72409681 | 0.01637046 | 0.12150057 |
| FAM188A   | 403.906875 | 0.37908087 | 0.01640977 | 0.12174095 |
| ADAMTS5   | 1547.87796 | -1.2074387 | 0.01646376 | 0.12201464 |
| EVC2      | 238.902341 | 0.56826488 | 0.01648134 | 0.12201464 |
| LDLRAD2   | 11.17156   | 1.22597667 | 0.01647545 | 0.12201464 |
| PDPK1     | 1217.32719 | -0.3072523 | 0.01645617 | 0.12201464 |
| YIPF5     | 934.538213 | 0.50648096 | 0.01647608 | 0.12201464 |
| TMEM145   | 16.0594457 | -1.1090047 | 0.01649746 | 0.1220826  |
| LTBP2     | 12209.0176 | 1.06622671 | 0.01654737 | 0.1222976  |
| NHLRC4    | 20.4533166 | 0.92815726 | 0.01654214 | 0.1222976  |
| SNAI1     | 16.6488587 | 1.12507045 | 0.01653521 | 0.1222976  |
| CYB561D2  | 107.15457  | 0.43408637 | 0.01663565 | 0.12289842 |
| MTO1      | 285.419356 | 0.42852192 | 0.01666919 | 0.12304281 |
| PDZD4     | 1540.02841 | -0.5239095 | 0.01666762 | 0.12304281 |
| CHCHD5    | 100.149992 | -0.4675818 | 0.01669168 | 0.12315718 |
| SLMAP     | 1179.40496 | 0.4923634  | 0.01673467 | 0.12342261 |
| GALC      | 445.466678 | 0.50635299 | 0.01676693 | 0.12360869 |
| ID4       | 1574.74504 | -1.0611992 | 0.01679743 | 0.123678   |
| OVGP1     | 39.5638713 | 0.84079444 | 0.01679279 | 0.123678   |
| SCN4B     | 600.794733 | 1.03577643 | 0.01679232 | 0.123678   |
| MRPS12    | 168.522291 | -0.4280847 | 0.01681222 | 0.12373512 |
| FRS2      | 1228.56547 | 0.20806862 | 0.01682771 | 0.12374554 |
| SNRPG     | 253.00344  | -0.4178507 | 0.01682643 | 0.12374554 |
| PRICKLE3  | 77.6791809 | -0.4960801 | 0.01683744 | 0.12375029 |
| RPS18P9   | 56.3695793 | 0.64583328 | 0.01684242 | 0.12375029 |
| ATP13A1   | 880.520999 | -0.3524328 | 0.01686205 | 0.12379107 |
| GNG10     | 64.874661  | 0.40082127 | 0.01685739 | 0.12379107 |
| PPM1K     | 537.927506 | 0.48653922 | 0.01688351 | 0.12389691 |



|             |            |            |            |            |
|-------------|------------|------------|------------|------------|
| FN3KRP      | 409.965049 | -0.4033351 | 0.01690867 | 0.12402985 |
| TMUB1       | 297.439901 | -0.4759638 | 0.01698572 | 0.12454307 |
| ANKRD31     | 30.8222985 | -0.9484377 | 0.0170068  | 0.12459376 |
| TNFRSF10C   | 14.568077  | 0.92103523 | 0.01700533 | 0.12459376 |
| RHBDL3      | 88.9697933 | -0.8885354 | 0.01701973 | 0.12463658 |
| DHX33       | 422.509173 | -0.4161583 | 0.01705544 | 0.1247942  |
| HLA-DQB1    | 587.199442 | 1.20118235 | 0.01705205 | 0.1247942  |
| CADM2       | 10.4136585 | -1.2239324 | 0.01707108 | 0.12480476 |
| KLHL21      | 295.624705 | 0.5953951  | 0.01706957 | 0.12480476 |
| BTLA        | 3.9608166  | 0.94320905 | 0.01711027 | 0.12503932 |
| WDR70       | 477.098621 | 0.32743792 | 0.01712498 | 0.12509484 |
| ADAMTS9-AS1 | 69.6413555 | 1.05003057 | 0.01718881 | 0.12540487 |
| GORAB       | 169.20808  | 0.42737881 | 0.0171829  | 0.12540487 |
| RECK        | 1379.9725  | -0.5241131 | 0.01717572 | 0.12540487 |
| MFAP5       | 1577.53    | 1.13750017 | 0.01722761 | 0.12563581 |
| CRABP1      | 6023.17308 | -1.1401613 | 0.01725974 | 0.12566619 |
| FGF13       | 8.86937171 | -1.0468769 | 0.01726182 | 0.12566619 |
| HBS1L       | 721.081992 | 0.43583218 | 0.01725765 | 0.12566619 |
| PARM1       | 57.9631921 | 0.90084309 | 0.01725833 | 0.12566619 |
| POLD1       | 283.416759 | -0.4473143 | 0.01726749 | 0.12566619 |
| TTC38       | 176.211297 | 0.32878802 | 0.01729129 | 0.12578737 |
| ASTE1       | 123.27816  | 0.37436779 | 0.01734745 | 0.12589934 |
| CWF19L1     | 292.278705 | 0.38493006 | 0.01732526 | 0.12589934 |
| HTR7        | 18.9614089 | 1.01944344 | 0.01733589 | 0.12589934 |
| LAMTOR3     | 538.169836 | 0.34688776 | 0.01734271 | 0.12589934 |
| MED7        | 147.38885  | 0.36702661 | 0.01734963 | 0.12589934 |
| TBC1D26     | 1.69659189 | 1.1347752  | 0.017329   | 0.12589934 |
| DOCK11      | 455.862323 | 0.52660387 | 0.01741953 | 0.12606325 |
| EPHB3       | 108.615407 | 0.93519374 | 0.0174154  | 0.12606325 |
| FXR1        | 1835.64737 | -0.2688147 | 0.01738191 | 0.12606325 |
| PCDHGA1     | 146.406419 | -0.9278872 | 0.01742239 | 0.12606325 |
| PTK2        | 2149.64879 | -0.3061128 | 0.017409   | 0.12606325 |
| SAP25       | 90.4107356 | -0.6149695 | 0.01740765 | 0.12606325 |
| TRPC2       | 3.31925008 | 1.13480143 | 0.01740217 | 0.12606325 |
| HMHA1       | 580.71561  | 0.76978618 | 0.01747597 | 0.12623723 |
| LRRC37BP1   | 254.001929 | 0.3571886  | 0.01747963 | 0.12623723 |
| POTEE       | 36.1149842 | -0.7634425 | 0.01746997 | 0.12623723 |
| PPTC7       | 359.92602  | -0.4939802 | 0.01748231 | 0.12623723 |
| ZNF664      | 2450.08196 | -0.4938254 | 0.01746687 | 0.12623723 |
| BTN3A1      | 365.524012 | 0.57604716 | 0.01749676 | 0.12623788 |
| CKLF        | 54.7061044 | 0.64292406 | 0.01749047 | 0.12623788 |
| CCL26       | 77.9117202 | 1.08365428 | 0.01751516 | 0.12626709 |
| MYOZ1       | 41.2404142 | 1.15928768 | 0.01751347 | 0.12626709 |
| C21orf128   | 3.21191093 | -1.1878946 | 0.01754716 | 0.12628142 |
| GPR88       | 24.2211318 | 1.21953206 | 0.01753318 | 0.12628142 |
| RER1        | 858.520844 | 0.37737768 | 0.01754608 | 0.12628142 |
| TMEM150A    | 153.598855 | 0.37882506 | 0.01753734 | 0.12628142 |
| ZFYVE16     | 1514.73254 | 0.38858027 | 0.01755305 | 0.12628142 |
| CUL3        | 1144.44518 | -0.2826773 | 0.01757687 | 0.12629783 |
| LOC441455   | 5.72410907 | 1.11819282 | 0.01757257 | 0.12629783 |

|            |            |            |            |            |
|------------|------------|------------|------------|------------|
| PIK3CD     | 217.708388 | 0.76063099 | 0.01757272 | 0.12629783 |
| FRMD3      | 42.7695614 | 0.5524958  | 0.01761391 | 0.1264823  |
| SKA1       | 14.6382782 | -0.9325176 | 0.01761692 | 0.1264823  |
| ASH1L-AS1  | 57.2095834 | -0.5555873 | 0.01764282 | 0.12656229 |
| C1orf213   | 51.0773663 | 0.67027802 | 0.01764081 | 0.12656229 |
| ORC2       | 530.755438 | -0.2257503 | 0.01764965 | 0.12656229 |
| ISG20L2    | 372.478476 | -0.2999802 | 0.01766427 | 0.12661552 |
| SF3A2      | 494.863194 | -0.4485977 | 0.01768529 | 0.12671458 |
| HIST1H2BH  | 142.710648 | -0.9846687 | 0.01773476 | 0.12681074 |
| KIF5A      | 203.229145 | -1.1951528 | 0.01771641 | 0.12681074 |
| MGP        | 3113.78849 | 0.79996454 | 0.01773146 | 0.12681074 |
| PLD3       | 5103.82038 | 0.70126558 | 0.01772836 | 0.12681074 |
| ZNF799     | 85.5289452 | 0.5945771  | 0.01773042 | 0.12681074 |
| CNTLN      | 838.605205 | 0.41279858 | 0.01776362 | 0.12690649 |
| DOCK8      | 1134.03703 | 0.66060933 | 0.01776062 | 0.12690649 |
| EIF1B-AS1  | 17.9996719 | 0.82827248 | 0.0177698  | 0.12690649 |
| CTTNBP2    | 144.085813 | 1.02680209 | 0.01778183 | 0.12693533 |
| RUNX1-IT1  | 24.7889353 | 0.82649883 | 0.01778827 | 0.12693533 |
| AMZ1       | 5.37178341 | -1.1416163 | 0.017848   | 0.12728474 |
| LINC01105  | 6.12096281 | -1.2176078 | 0.0178517  | 0.12728474 |
| PCDHGB6    | 398.20236  | -0.8484708 | 0.01786466 | 0.12732553 |
| FER1L4     | 462.01982  | -0.9327065 | 0.01787252 | 0.12732998 |
| OTUD3      | 319.193637 | 0.56811154 | 0.01789239 | 0.12741992 |
| ADRM1      | 715.452496 | -0.4496354 | 0.01792085 | 0.12746775 |
| AGO2       | 706.622199 | -0.3838945 | 0.01792036 | 0.12746775 |
| B3GALT5    | 4.63391928 | -1.1667899 | 0.01790689 | 0.12746775 |
| KCNJ5      | 46.639109  | 0.76220326 | 0.01797256 | 0.12773228 |
| LIMD1-AS1  | 6.43559814 | 0.96278904 | 0.01796631 | 0.12773228 |
| STRN4      | 982.856253 | -0.2677645 | 0.01798458 | 0.12776604 |
| ATG4B      | 635.563948 | -0.3732264 | 0.01800058 | 0.12782811 |
| SCARB2     | 2990.27891 | 0.35009122 | 0.01801461 | 0.12787609 |
| DLGAP1-AS2 | 12.3857047 | 0.75002685 | 0.01806245 | 0.1281261  |
| LINC00294  | 212.520957 | 0.44342822 | 0.0180644  | 0.1281261  |
| TBC1D10B   | 607.005218 | -0.2957194 | 0.01808094 | 0.12819173 |
| FZD8       | 181.097157 | 0.70579283 | 0.01809783 | 0.12820815 |
| PTGIR      | 6.36669564 | 1.07045238 | 0.01809417 | 0.12820815 |
| PMP2       | 16.3963299 | -1.1857319 | 0.01812709 | 0.12836373 |
| COX5B      | 1038.30834 | -0.4849756 | 0.01813659 | 0.12837935 |
| FOPNL      | 375.580776 | 0.32291037 | 0.0181483  | 0.12841054 |
| ZXDA       | 227.941113 | 0.41703052 | 0.0181821  | 0.12859794 |
| BATF3      | 10.2438693 | 1.06146388 | 0.018209   | 0.1286847  |
| RASGRF2-AS | 2.46146715 | 1.21185304 | 0.01820244 | 0.1286847  |
| FGGY       | 179.463029 | 0.49608873 | 0.0182425  | 0.12885987 |
| HAPLN3     | 69.5087713 | 0.99517931 | 0.01824843 | 0.12885987 |
| HHIPL1     | 81.0423643 | 0.79695421 | 0.01826818 | 0.12894752 |
| CTSC       | 1310.77348 | -0.9046148 | 0.01827673 | 0.12895617 |
| ZNF407     | 830.473994 | 0.36349569 | 0.01828486 | 0.1289618  |
| LINC00467  | 50.7160623 | -0.6361161 | 0.01830535 | 0.12905453 |
| GGN        | 5.34802273 | -0.9971445 | 0.0183304  | 0.12917936 |
| ATP5G3     | 1557.75168 | -0.5998609 | 0.0183411  | 0.12920301 |

|           |            |            |            |            |
|-----------|------------|------------|------------|------------|
| RYK       | 1109.58663 | 0.2783256  | 0.01834859 | 0.12920407 |
| GM2A      | 1075.43973 | 0.32270765 | 0.01836734 | 0.12923263 |
| TNFAIP1   | 965.429219 | -0.3541293 | 0.01836611 | 0.12923263 |
| NEK7      | 1068.71028 | 0.32621972 | 0.01837622 | 0.12924337 |
| COQ7      | 319.227089 | 0.31970067 | 0.01840596 | 0.12935342 |
| NCAPD2    | 682.605805 | -0.3954637 | 0.01841014 | 0.12935342 |
| PCDHGB4   | 412.949842 | -0.8367136 | 0.01841393 | 0.12935342 |
| SIRT7     | 120.821191 | -0.4782833 | 0.01843579 | 0.12945532 |
| CIRBP     | 4270.23654 | 0.47342875 | 0.01847439 | 0.1296746  |
| CEP57L1   | 161.719035 | 0.61520745 | 0.01849778 | 0.12973526 |
| GALNT4    | 13.5125667 | 0.72768225 | 0.01849573 | 0.12973526 |
| GOLGA2P7  | 97.8499178 | -0.6178131 | 0.01854276 | 0.12999889 |
| DLD       | 1168.34532 | -0.4106832 | 0.01858264 | 0.13022654 |
| EVI5      | 909.140958 | 0.49112573 | 0.01859193 | 0.13023973 |
| BLACAT1   | 2.18744506 | -1.2084236 | 0.01863237 | 0.13047113 |
| RRP7B     | 119.362232 | 0.50576098 | 0.01864075 | 0.13047787 |
| ZNF322    | 253.985889 | 0.4529534  | 0.01866415 | 0.13058969 |
| C20orf203 | 16.9625886 | 0.98861242 | 0.01868586 | 0.13065363 |
| PPP2R2C   | 73.3034838 | -1.0757266 | 0.01868815 | 0.13065363 |
| CLK1      | 2311.83593 | 0.47991604 | 0.01870874 | 0.13069368 |
| CROCCP2   | 202.069261 | 0.61718554 | 0.01870678 | 0.13069368 |
| GGTA1P    | 221.561618 | 0.78954218 | 0.01873617 | 0.13078142 |
| RPP25     | 81.4771471 | -1.0472373 | 0.01873214 | 0.13078142 |
| TNFRSF10A | 20.1251698 | 0.89360767 | 0.01875457 | 0.13085794 |
| UBR2      | 1627.01755 | 0.43485549 | 0.01877111 | 0.13092144 |
| DMBX1     | 12.7212476 | -1.2013785 | 0.01879392 | 0.13100603 |
| TMC3      | 4.85553803 | 1.19551678 | 0.01879814 | 0.13100603 |
| CCDC58    | 75.862956  | -0.4519992 | 0.01880718 | 0.13101714 |
| AGAP11    | 264.864654 | 0.87815612 | 0.01881869 | 0.13104542 |
| ADAMTS4   | 110.546578 | 1.03740159 | 0.01883883 | 0.13113377 |
| ZNF513    | 228.690349 | -0.3679572 | 0.01886964 | 0.1312963  |
| DDX41     | 669.645887 | -0.3128845 | 0.01888657 | 0.13131017 |
| TSIX      | 16.5620458 | 1.18213852 | 0.0188835  | 0.13131017 |
| ZNRF1     | 146.536957 | -0.5354503 | 0.01889749 | 0.13133418 |
| TM6SF2    | 27.2971018 | -0.7804078 | 0.01890979 | 0.1313678  |
| MIER1     | 796.199396 | 0.43170769 | 0.01895837 | 0.13151124 |
| MMD2      | 1.42785939 | -1.1810182 | 0.01895617 | 0.13151124 |
| SCARNA10  | 4141.29921 | 0.42575583 | 0.01895169 | 0.13151124 |
| SEMA4G    | 108.306124 | -0.7890921 | 0.01896782 | 0.13151124 |
| SLC35A3   | 391.772041 | 0.46908301 | 0.01896568 | 0.13151124 |
| PAX9      | 4.40823114 | -1.1808548 | 0.01901199 | 0.13171364 |
| SEMA3A    | 62.2756074 | -1.1972194 | 0.01900774 | 0.13171364 |
| RPS2      | 8170.53671 | -0.4871434 | 0.01907989 | 0.13213202 |
| KIAA0226L | 90.6040974 | 0.82517593 | 0.01909007 | 0.13215045 |
| WBP4      | 240.802899 | 0.40501535 | 0.01910187 | 0.13218012 |
| RAD23B    | 2922.47049 | -0.3010609 | 0.01911827 | 0.13224156 |
| C14orf132 | 327.314922 | 1.01144151 | 0.01914552 | 0.132378   |
| CHTOP     | 627.00304  | -0.2472034 | 0.01915873 | 0.13241729 |
| FASLG     | 1.58149491 | 1.19573955 | 0.01916669 | 0.13242032 |
| ABCC2     | 25.6058877 | 0.78279285 | 0.019215   | 0.13264097 |

|           |            |            |            |            |
|-----------|------------|------------|------------|------------|
| ATP5J2    | 637.677347 | -0.3769351 | 0.01921012 | 0.13264097 |
| HIST1H2AH | 111.510033 | -0.7432187 | 0.01923633 | 0.13264097 |
| RRP7A     | 374.757528 | 0.32485931 | 0.01922256 | 0.13264097 |
| SNX19     | 2855.25058 | -0.3111833 | 0.01923408 | 0.13264097 |
| C11orf53  | 3.84436301 | -1.2022426 | 0.01930989 | 0.13264208 |
| CAPN6     | 169.25765  | -1.1536852 | 0.01931618 | 0.13264208 |
| COMT      | 553.824982 | 0.42791138 | 0.01932092 | 0.13264208 |
| DDX12P    | 104.890152 | -0.6566637 | 0.01932049 | 0.13264208 |
| HIST1H2AG | 216.86582  | -0.8925885 | 0.01927683 | 0.13264208 |
| HIST1H3H  | 127.286246 | -0.694482  | 0.01926712 | 0.13264208 |
| HPGD      | 182.742463 | 1.08881976 | 0.01926657 | 0.13264208 |
| ICOS      | 2.32270959 | 1.12847095 | 0.01931981 | 0.13264208 |
| NOTUM     | 2.43845651 | -1.0761138 | 0.01924577 | 0.13264208 |
| RPPH1     | 88350.0298 | 0.3630559  | 0.01930818 | 0.13264208 |
| TMEM260   | 407.800665 | 0.46738151 | 0.01932698 | 0.13264208 |
| TMEM59    | 2087.19386 | 0.51827131 | 0.01925807 | 0.13264208 |
| MT1M      | 11.821481  | 1.15917772 | 0.01934299 | 0.13270012 |
| AGRN      | 4325.10607 | -0.6370926 | 0.01938757 | 0.13283925 |
| CIITA     | 571.479516 | 0.86644262 | 0.01938167 | 0.13283925 |
| ETV7      | 18.1788379 | 0.89517105 | 0.01940889 | 0.13283925 |
| FAM212A   | 33.9820786 | 0.93579343 | 0.01940565 | 0.13283925 |
| PRPF18    | 248.327115 | 0.37098454 | 0.01941613 | 0.13283925 |
| RABL3     | 263.633169 | 0.38689788 | 0.01941217 | 0.13283925 |
| TCP11     | 1.33381015 | 1.16483818 | 0.01940654 | 0.13283925 |
| OGDH      | 2319.1214  | -0.5116648 | 0.01944721 | 0.1329485  |
| RP2       | 340.133793 | 0.38132556 | 0.01944617 | 0.1329485  |
| LURAP1L   | 155.748661 | -1.0257479 | 0.01947774 | 0.13310548 |
| EPN2      | 619.397765 | -0.2873489 | 0.01950154 | 0.13320126 |
| JUP       | 2481.25349 | -0.5996657 | 0.0195069  | 0.13320126 |
| TM2D1     | 250.068047 | 0.49393614 | 0.01957985 | 0.1336475  |
| COL2A1    | 2113.5285  | -1.1171761 | 0.01960285 | 0.13375258 |
| TNNI3     | 4.31224158 | -1.1725173 | 0.01961048 | 0.13375272 |
| SYT13     | 4.4903428  | -1.1547917 | 0.01962702 | 0.13381366 |
| GBP4      | 235.628734 | 0.75534924 | 0.01969446 | 0.13422142 |
| MORN2     | 82.1801757 | 0.65477723 | 0.01973776 | 0.13446444 |
| SIGLEC11  | 55.7525836 | 1.01498967 | 0.01975372 | 0.13452104 |
| MAPT      | 37.5094298 | -0.9005335 | 0.0198922  | 0.13533995 |
| PHPT1     | 871.010425 | -0.3599938 | 0.01989705 | 0.13533995 |
| UBL4B     | 78.2432099 | 1.17019545 | 0.01989365 | 0.13533995 |
| GIMAP1    | 102.06355  | 0.79500135 | 0.01990591 | 0.13534786 |
| OSCAR     | 29.1761609 | 0.8293059  | 0.01995346 | 0.13556639 |
| ZNF790    | 145.365293 | 0.48365625 | 0.01995087 | 0.13556639 |
| CMPK2     | 101.343701 | 0.54732662 | 0.01997446 | 0.13565666 |
| NAGLU     | 436.409366 | 0.52165421 | 0.01998276 | 0.13566043 |
| SCAMP1    | 1003.96194 | 0.4022738  | 0.01999044 | 0.13566043 |
| SNX2      | 1658.94676 | 0.50063094 | 0.02002603 | 0.13584958 |
| RPA2      | 377.589674 | 0.43611188 | 0.02003775 | 0.13587665 |
| THRB      | 46.2296847 | 1.04260147 | 0.02009199 | 0.13619196 |
| NR2F2     | 2724.00323 | -0.9908574 | 0.02013377 | 0.13637004 |
| RTP1      | 1.28070757 | 1.18475832 | 0.02012709 | 0.13637004 |

|            |            |            |            |            |
|------------|------------|------------|------------|------------|
| AMER2      | 5.82384108 | -1.1938888 | 0.02014845 | 0.13641692 |
| EPB41L1    | 1777.44184 | -0.4802824 | 0.02017978 | 0.13656612 |
| TGM4       | 5.01426476 | -1.1895612 | 0.02018601 | 0.13656612 |
| ALPK3      | 278.001769 | 0.8905612  | 0.02023479 | 0.13678724 |
| CNTNAP3    | 449.574033 | -0.9272911 | 0.02022891 | 0.13678724 |
| EFNA2      | 11.2135371 | -0.9426364 | 0.02024202 | 0.13678724 |
| ABCA2      | 1133.59339 | -0.6623067 | 0.02027629 | 0.13691361 |
| ATG5       | 354.917825 | 0.39143227 | 0.02026988 | 0.13691361 |
| NELL1      | 56.952565  | -1.1909234 | 0.02031543 | 0.1370201  |
| PTPLB      | 237.623248 | 0.57143284 | 0.0203148  | 0.1370201  |
| ZNF558     | 270.770498 | 0.38066499 | 0.02030488 | 0.1370201  |
| LSS        | 1730.64353 | -0.5501576 | 0.02033324 | 0.1370463  |
| LTB4R2     | 53.9555084 | -0.6344587 | 0.0203349  | 0.1370463  |
| NRL        | 6.7339895  | 0.68355218 | 0.02036267 | 0.13718094 |
| DUSP23     | 119.251354 | -0.5098406 | 0.02040896 | 0.13735956 |
| MYO1B      | 319.959448 | -0.8406336 | 0.02042042 | 0.13735956 |
| QRICH2     | 206.207651 | 0.38265863 | 0.02039741 | 0.13735956 |
| SMPX       | 1.45186379 | 1.00278783 | 0.02041882 | 0.13735956 |
| LOC1005065 | 599.131677 | 0.46756424 | 0.02048946 | 0.13774648 |
| WNT11      | 7.11154317 | -1.057469  | 0.02049361 | 0.13774648 |
| TMEM135    | 736.846847 | 0.40800202 | 0.0205097  | 0.13777375 |
| TRAPPC8    | 1103.50397 | 0.37506737 | 0.02051333 | 0.13777375 |
| SC5D       | 776.977657 | -0.3830821 | 0.02052575 | 0.13780457 |
| AATK       | 149.401996 | -0.7910415 | 0.02057393 | 0.13798365 |
| GPATCH3    | 104.319178 | 0.47584676 | 0.02057596 | 0.13798365 |
| HVCN1      | 143.356244 | 0.63699841 | 0.0205679  | 0.13798365 |
| TUBGCP3    | 617.596494 | -0.3496894 | 0.02059891 | 0.13808493 |
| MARK2      | 572.707845 | -0.3660357 | 0.02061567 | 0.13814459 |
| GSKIP      | 91.4371207 | 0.49895405 | 0.02066233 | 0.13840453 |
| FLJ37201   | 25.4705171 | 0.77959017 | 0.02070175 | 0.13861585 |
| CEP72      | 63.0589905 | -0.4493509 | 0.02072392 | 0.13864931 |
| CRYM       | 15.1845996 | -1.1826112 | 0.02073235 | 0.13864931 |
| MBLAC1     | 13.0605761 | 0.71410213 | 0.02073828 | 0.13864931 |
| PCSK9      | 24.8302562 | -1.130476  | 0.0207164  | 0.13864931 |
| ADAMTS14   | 10.318732  | -1.0446641 | 0.0207495  | 0.1386636  |
| AGAP3      | 892.781635 | -0.3789492 | 0.02076407 | 0.1386636  |
| KLC2       | 369.680981 | -0.4527857 | 0.02076362 | 0.1386636  |
| DUSP27     | 34.2636578 | 0.98986861 | 0.02080408 | 0.13883712 |
| GTF3C2     | 793.599615 | -0.3329293 | 0.02081084 | 0.13883712 |
| RBM15B     | 1087.24527 | -0.3693117 | 0.02081373 | 0.13883712 |
| CCDC117    | 278.903307 | 0.41939427 | 0.0208406  | 0.13896367 |
| AKNA       | 681.550614 | 0.45716503 | 0.02085712 | 0.13902111 |
| PTTG1      | 67.2064444 | -0.8854155 | 0.02087996 | 0.13912062 |
| ACKR1      | 6.99517371 | 1.11553294 | 0.02090343 | 0.13922427 |
| LTBP1      | 2609.06248 | 0.95084435 | 0.02091169 | 0.13922655 |
| NUPL2      | 231.969234 | 0.34274406 | 0.02091981 | 0.13922796 |
| IL13RA1    | 1643.59435 | 0.44590272 | 0.02093352 | 0.13924274 |
| UBTF       | 2491.24674 | -0.319482  | 0.02093787 | 0.13924274 |
| ST8SIA3    | 52.5894541 | -1.1853199 | 0.02094843 | 0.13926036 |
| USP7       | 1899.04891 | -0.1478745 | 0.02096423 | 0.13931271 |

|            |            |            |            |            |
|------------|------------|------------|------------|------------|
| CABP1      | 2.96240915 | -1.1742599 | 0.0209911  | 0.13931454 |
| DOC2A      | 33.8932638 | -0.9659116 | 0.02102218 | 0.13931454 |
| GFI1       | 7.38628728 | 0.8622671  | 0.0210437  | 0.13931454 |
| KDM2A      | 2317.57699 | -0.2680049 | 0.02102788 | 0.13931454 |
| KNOP1      | 163.419734 | -0.4565234 | 0.0210315  | 0.13931454 |
| PICALM     | 3262.32494 | 0.29412504 | 0.02099471 | 0.13931454 |
| PLL        | 31.9477573 | -0.921835  | 0.02099862 | 0.13931454 |
| PRKCA      | 2990.08668 | -0.7244323 | 0.02101676 | 0.13931454 |
| SLC16A5    | 925.926778 | -0.8082879 | 0.02098009 | 0.13931454 |
| TRIM37     | 861.870872 | -0.4865002 | 0.02104223 | 0.13931454 |
| CHAMP1     | 300.645644 | -0.4955399 | 0.02108068 | 0.13950683 |
| ERMAP      | 219.999567 | 0.61984344 | 0.02112068 | 0.13951607 |
| MSH6       | 946.029604 | -0.4290833 | 0.02112967 | 0.13951607 |
| MTMR9LP    | 161.889609 | 0.98185723 | 0.02112281 | 0.13951607 |
| NOXRED1    | 7.08285056 | 0.8112119  | 0.02109816 | 0.13951607 |
| TRPV2      | 106.164722 | 0.65515944 | 0.02112013 | 0.13951607 |
| VAV1       | 181.1728   | 0.76569646 | 0.02110029 | 0.13951607 |
| RBP1       | 870.548966 | -0.9887752 | 0.02116584 | 0.1397025  |
| MAPK14     | 827.389015 | 0.37223468 | 0.02121025 | 0.13994312 |
| KIF26B     | 34.011879  | 1.0115947  | 0.02124616 | 0.13997    |
| TCTEX1D1   | 3.29193443 | 1.0165559  | 0.02123317 | 0.13997    |
| ZBTB14     | 243.608424 | 0.35857244 | 0.02123418 | 0.13997    |
| ZNF566     | 253.098602 | 0.34429472 | 0.02123917 | 0.13997    |
| MFNG       | 122.096569 | 0.63471498 | 0.02127239 | 0.14003792 |
| PRAC2      | 2.59163497 | -1.1161663 | 0.02126562 | 0.14003792 |
| HECTD4     | 5221.03483 | -0.3851433 | 0.02128902 | 0.140095   |
| RNF166     | 261.958076 | 0.49126321 | 0.02132142 | 0.1402557  |
| USP33      | 1110.76221 | 0.42360706 | 0.02134779 | 0.1403767  |
| RNF32      | 8.56184404 | -0.7770297 | 0.0213923  | 0.14061677 |
| EYA4       | 31.8207818 | -1.1743306 | 0.02140945 | 0.14067699 |
| LOC440311  | 1.55378968 | -1.1092299 | 0.02145756 | 0.1409396  |
| MXD3       | 97.8683955 | -0.4487267 | 0.02147322 | 0.1409396  |
| SNHG5      | 312.678066 | 0.75415509 | 0.02147346 | 0.1409396  |
| ABHD12B    | 1.50412745 | -1.1796681 | 0.02149438 | 0.14102433 |
| EPN2-IT1   | 11.3517259 | -0.6565899 | 0.02151264 | 0.14109146 |
| CABYR      | 15.6405737 | -1.010721  | 0.02156097 | 0.14121344 |
| CTSE       | 1.49687832 | -1.1142887 | 0.02156222 | 0.14121344 |
| RASGRF2    | 1532.29275 | 0.76960736 | 0.02156252 | 0.14121344 |
| ZNF333     | 350.678956 | 0.3912263  | 0.02156335 | 0.14121344 |
| VIPR2      | 31.134779  | -1.1703198 | 0.02160478 | 0.14143211 |
| MB21D2     | 68.8107865 | 0.76914874 | 0.02161308 | 0.14143379 |
| TPBGL      | 3.52678464 | -1.0970849 | 0.02169346 | 0.14190699 |
| SNORA34    | 39.5255362 | 0.81278162 | 0.02170211 | 0.14191079 |
| ATXN3      | 549.410449 | 0.44205285 | 0.02172925 | 0.14193004 |
| LOC145474  | 106.919097 | 0.78827882 | 0.02172545 | 0.14193004 |
| NQO1       | 887.098717 | -0.7329654 | 0.02172574 | 0.14193004 |
| MXD1       | 169.120691 | -0.5361008 | 0.02174021 | 0.14194887 |
| BBS10      | 410.010307 | 0.37059755 | 0.02177081 | 0.14204325 |
| SNORA23    | 216.465159 | -0.4335271 | 0.02177034 | 0.14204325 |
| LOC1019297 | 11.4790365 | 1.13079537 | 0.02179708 | 0.14216189 |

|           |            |            |            |            |
|-----------|------------|------------|------------|------------|
| USP36     | 908.702588 | -0.4461883 | 0.02184222 | 0.1424035  |
| RHPN1-AS1 | 2.28034778 | -1.0214124 | 0.02186095 | 0.14247282 |
| ODF2      | 732.615776 | -0.3001716 | 0.0218776  | 0.14250572 |
| TIMM8A    | 70.2656692 | -0.4150792 | 0.0218822  | 0.14250572 |
| LRRC42    | 301.259641 | 0.53035989 | 0.02192613 | 0.14268616 |
| ZFP37     | 118.339467 | 0.71909175 | 0.02191834 | 0.14268616 |
| MIA3      | 1922.4598  | -0.2734792 | 0.02195594 | 0.14282729 |
| RNA45S5   | 7239175.76 | -1.109938  | 0.02196784 | 0.14285185 |
| RPAP2     | 258.57948  | 0.41394935 | 0.02199274 | 0.14296091 |
| CLIC3     | 186.136485 | -0.9693712 | 0.02200137 | 0.14296419 |
| PIWIL4    | 44.2864992 | 0.54077244 | 0.02202376 | 0.14300404 |
| YIPF1     | 193.125417 | 0.50307635 | 0.02202321 | 0.14300404 |
| ANKRD46   | 285.00024  | 0.45730971 | 0.02205712 | 0.14300551 |
| PDCD1LG2  | 12.9429015 | 0.9217066  | 0.02205107 | 0.14300551 |
| PPIE      | 288.725871 | 0.33864624 | 0.02206464 | 0.14300551 |
| PRMT9     | 306.994362 | 0.53912283 | 0.0220435  | 0.14300551 |
| SGK2      | 33.7989517 | 0.86168865 | 0.02206114 | 0.14300551 |
| FAM13C    | 27.6955228 | -0.9225141 | 0.02208233 | 0.14306747 |
| GATAD1    | 977.547606 | 0.36175119 | 0.02210386 | 0.14315427 |
| LOC283683 | 30.6325717 | 1.04807838 | 0.02212244 | 0.14322181 |
| FAAH      | 141.529287 | -0.8157932 | 0.02215803 | 0.1433995  |
| FBXO2     | 47.83577   | -1.0019384 | 0.02217223 | 0.14343861 |
| DENND6A   | 756.556457 | 0.46324975 | 0.02227574 | 0.14400232 |
| EXOC6B    | 609.293694 | -0.3338332 | 0.02226839 | 0.14400232 |
| AKR1A1    | 457.858532 | 0.41313073 | 0.02231739 | 0.14421857 |
| C1QTNF3   | 46.2268216 | 0.6684     | 0.02234237 | 0.14432696 |
| SH3BGRL2  | 380.395951 | 0.8680664  | 0.02235998 | 0.14438771 |
| SLC35B4   | 1147.66447 | -0.3732341 | 0.02239971 | 0.14459119 |
| MANEAL    | 123.116597 | -0.9646923 | 0.02241702 | 0.14464978 |
| CD180     | 58.8601312 | 0.93057242 | 0.02242877 | 0.14467256 |
| EMC10     | 1644.02197 | -0.4841153 | 0.02243731 | 0.14467458 |
| GCLM      | 207.941893 | 0.67644405 | 0.02247396 | 0.14479644 |
| TMEM97    | 326.920984 | -0.6096927 | 0.02247767 | 0.14479644 |
| TRAF2     | 122.555914 | -0.3635639 | 0.0224809  | 0.14479644 |
| RASSF1    | 219.499388 | 0.4790098  | 0.02250926 | 0.144873   |
| SLC16A13  | 31.8354518 | -0.7479789 | 0.02250476 | 0.144873   |
| PRR24     | 107.315749 | -0.3739479 | 0.02256105 | 0.14510016 |
| SLC25A18  | 5.24293249 | -1.146338  | 0.02255286 | 0.14510016 |
| CDKL3     | 47.1019481 | 0.55959794 | 0.02259659 | 0.1452756  |
| ANO4      | 55.1641555 | -1.1720195 | 0.02260938 | 0.14530469 |
| ANO7      | 33.0873216 | -0.7671802 | 0.02262325 | 0.14534073 |
| C12orf4   | 386.5365   | 0.35202006 | 0.02270974 | 0.14563045 |
| CHRNA5    | 15.7300343 | -1.0684798 | 0.02270122 | 0.14563045 |
| FTCD      | 5.27121695 | -1.166937  | 0.02268978 | 0.14563045 |
| HOXC10    | 7.15884048 | -1.1039435 | 0.02268606 | 0.14563045 |
| STXBP1    | 550.37071  | -0.4403956 | 0.02270203 | 0.14563045 |
| WDR12     | 252.856675 | -0.3777361 | 0.02272192 | 0.14565547 |
| RAB9A     | 190.923952 | 0.34813993 | 0.02273811 | 0.14570617 |
| ASIC4     | 3.91253504 | -1.1217688 | 0.02275612 | 0.14574644 |
| C6orf57   | 36.3525694 | 0.51557915 | 0.02283081 | 0.14574644 |

|             |            |            |            |            |
|-------------|------------|------------|------------|------------|
| DSEL        | 565.543822 | 0.70284065 | 0.02284383 | 0.14574644 |
| GAS2L2      | 3.54346705 | 1.10146742 | 0.02280225 | 0.14574644 |
| GTF2IRD2    | 83.8502202 | 0.49529087 | 0.02279137 | 0.14574644 |
| LOC1001283  | 58.349835  | -0.7533129 | 0.02280691 | 0.14574644 |
| SNORA14B    | 4.66188067 | 0.94093988 | 0.02283932 | 0.14574644 |
| SUV39H1     | 93.1343228 | -0.4311541 | 0.02282637 | 0.14574644 |
| TOM1L1      | 387.214129 | -0.4187897 | 0.02281605 | 0.14574644 |
| UTRN        | 8368.32818 | 0.4878453  | 0.02280177 | 0.14574644 |
| ZNF461      | 118.698223 | 0.48275432 | 0.02281377 | 0.14574644 |
| ZNF571      | 87.7497247 | 0.55711513 | 0.02283178 | 0.14574644 |
| PYHIN1      | 5.88551776 | 0.9850462  | 0.02285287 | 0.14575127 |
| KDM1A       | 719.00567  | 0.38496498 | 0.02289942 | 0.14588311 |
| KIAA1919    | 363.66915  | 0.45647645 | 0.02290672 | 0.14588311 |
| LCMT2       | 262.440246 | -0.2948622 | 0.02288622 | 0.14588311 |
| SLC16A1-AS1 | 48.6828666 | 0.63148543 | 0.02289984 | 0.14588311 |
| PGAM5       | 353.092555 | -0.3866073 | 0.02293361 | 0.1460015  |
| GABRA2      | 2.39596876 | -1.1659968 | 0.02295177 | 0.14606426 |
| P2RY13      | 303.662961 | 0.88714096 | 0.02296864 | 0.14609903 |
| SLC25A10    | 62.3258938 | -0.6775806 | 0.02297384 | 0.14609903 |
| LINC01114   | 7.31567651 | 1.16860858 | 0.02300357 | 0.14618239 |
| MARK4       | 507.534155 | -0.459805  | 0.02300338 | 0.14618239 |
| CYB5RL      | 76.24936   | 0.45423479 | 0.02301462 | 0.14619974 |
| ZNF628      | 95.4319927 | -0.5242396 | 0.02305015 | 0.14637263 |
| EBF1        | 666.668596 | 1.0391292  | 0.02309154 | 0.14651286 |
| VAPA        | 1744.87672 | 0.4418301  | 0.02309722 | 0.14651286 |
| ZNF687      | 694.975096 | -0.3119419 | 0.02308602 | 0.14651286 |
| LOC284454   | 127.558221 | 0.80651349 | 0.02311455 | 0.14651706 |
| TOPBP1      | 818.273735 | -0.3110517 | 0.02311423 | 0.14651706 |
| CXCR4       | 584.255172 | 0.72972498 | 0.02315041 | 0.14663869 |
| TM6SF1      | 167.758218 | 0.79312131 | 0.02314511 | 0.14663869 |
| APP         | 22567.5744 | -0.6767832 | 0.0231763  | 0.14665722 |
| BCAS4       | 122.53573  | -1.0003311 | 0.02317834 | 0.14665722 |
| FAM133CP    | 249.403172 | 0.60558163 | 0.02316549 | 0.14665722 |
| ARSA        | 403.186196 | 0.5279774  | 0.02323884 | 0.14686777 |
| KRT9        | 1.34669731 | -1.1644467 | 0.02322113 | 0.14686777 |
| LOC644762   | 2.05315684 | -1.1099228 | 0.02324502 | 0.14686777 |
| VPS9D1      | 278.243301 | -0.4634379 | 0.02323057 | 0.14686777 |
| AMMECR1     | 143.041848 | -0.4187597 | 0.02327301 | 0.14699181 |
| TBKBP1      | 294.998848 | -0.3626898 | 0.02331215 | 0.1471862  |
| CEP41       | 169.412785 | 0.44919586 | 0.02341916 | 0.14780875 |
| FLJ44087    | 13.5658354 | 1.11666973 | 0.0234994  | 0.14826201 |
| FBXO44      | 270.848594 | 0.35644903 | 0.02352392 | 0.14831031 |
| LZTFL1      | 353.592318 | 0.52593524 | 0.02351915 | 0.14831031 |
| EIF3G       | 1035.5146  | 0.3681083  | 0.02355053 | 0.14842485 |
| TRMT13      | 218.381029 | 0.41701541 | 0.02358619 | 0.14859637 |
| NRGN        | 29.2459566 | -1.0484839 | 0.02366882 | 0.14906357 |
| FAM43A      | 605.45137  | -0.9276701 | 0.02368966 | 0.14914144 |
| C11orf1     | 162.445485 | -0.4916681 | 0.02370504 | 0.14918487 |
| MPO         | 1.29029806 | 1.15486564 | 0.02376895 | 0.14953358 |
| IL20RB      | 28.5726297 | -0.7587294 | 0.02379128 | 0.14962054 |



|            |            |            |            |            |
|------------|------------|------------|------------|------------|
| LOC284837  | 10.1599216 | 1.04159434 | 0.0238044  | 0.14964954 |
| NBPF14     | 1.33868242 | 1.11770941 | 0.02381515 | 0.14966364 |
| DKC1       | 492.482107 | -0.3271044 | 0.02382379 | 0.14966443 |
| BCAM       | 697.903637 | -0.8670311 | 0.02385676 | 0.14981807 |
| COG5       | 1012.17638 | 0.26061391 | 0.02388437 | 0.14983254 |
| OCIAD2     | 81.6551468 | -0.8215368 | 0.02389598 | 0.14983254 |
| SGPP1      | 353.533717 | 0.55821062 | 0.02390165 | 0.14983254 |
| TLE1       | 188.46178  | 0.76038042 | 0.02389307 | 0.14983254 |
| TYMS       | 281.937473 | -0.6943063 | 0.02387407 | 0.14983254 |
| LRRC25     | 145.701689 | 0.70435931 | 0.02391216 | 0.14984501 |
| TRNAU1AP   | 124.542714 | 0.49741092 | 0.0239737  | 0.15017716 |
| VEGFB      | 914.20998  | -0.5022457 | 0.02398939 | 0.15022189 |
| CD74       | 13997.8753 | 0.73587778 | 0.02400691 | 0.15027815 |
| ZZZ3       | 691.327552 | 0.42298675 | 0.02401686 | 0.15028691 |
| CA8        | 108.394455 | -1.0513055 | 0.02405843 | 0.15044    |
| SNORA71A   | 44.4052054 | -0.8527776 | 0.0240533  | 0.15044    |
| RPGR       | 93.182107  | 0.63333227 | 0.02411707 | 0.15075313 |
| UBE2Q2L    | 6.07958101 | 0.97023336 | 0.0241417  | 0.15085348 |
| KRTAP5-AS1 | 1.65027619 | -1.1567699 | 0.0241839  | 0.15106271 |
| SPIN2B     | 66.2032477 | -0.4401888 | 0.02419417 | 0.15106271 |
| ZNF25      | 403.212787 | 0.51488051 | 0.02420095 | 0.15106271 |
| RTCA       | 259.84242  | 0.47556789 | 0.02420979 | 0.15106428 |
| LINC00887  | 129.536753 | -1.1190161 | 0.0242687  | 0.1513458  |
| TMEM119    | 241.85159  | 1.05755183 | 0.02427211 | 0.1513458  |
| FCHO2      | 1111.04489 | 0.33712406 | 0.02428129 | 0.15134936 |
| NXT2       | 118.164647 | 0.47734947 | 0.02429406 | 0.1513753  |
| ZDHH17     | 1095.15507 | 0.29692156 | 0.02431378 | 0.15144452 |
| PPRC1      | 692.818752 | -0.4954754 | 0.02432501 | 0.15146084 |
| ZFY        | 20.0408517 | -1.1381648 | 0.02433612 | 0.15147641 |
| DR1        | 552.322066 | 0.37583831 | 0.02440461 | 0.15184902 |
| CITED2     | 1438.56653 | 0.60448311 | 0.02443291 | 0.15197129 |
| PRKG2      | 319.209222 | -1.1545576 | 0.02444508 | 0.15198178 |
| RPS12      | 3929.33635 | 0.54889957 | 0.02445187 | 0.15198178 |
| LINC00526  | 19.4238322 | 0.59534329 | 0.0245125  | 0.15230479 |
| LAMA1      | 727.901864 | -1.083267  | 0.02452214 | 0.1523109  |
| CYP27A1    | 750.785532 | 0.39548505 | 0.02458733 | 0.15263099 |
| LOC727896  | 44.2935163 | 0.70086965 | 0.02459103 | 0.15263099 |
| KY         | 2.36648907 | 1.14588203 | 0.02463472 | 0.15274716 |
| RPS15      | 2503.07766 | 0.35785588 | 0.02462268 | 0.15274716 |
| SH3BP5L    | 387.513504 | -0.3107892 | 0.0246358  | 0.15274716 |
| PCSK7      | 847.433628 | -0.3152662 | 0.02466811 | 0.15289358 |
| AS3MT      | 6.65510378 | 0.81791613 | 0.02469339 | 0.1529425  |
| GPR133     | 683.899119 | 0.97284803 | 0.02469273 | 0.1529425  |
| BMX        | 8.10716473 | 1.0776649  | 0.02481937 | 0.1536687  |
| HYMAI      | 107.414978 | 0.91529704 | 0.02484708 | 0.15378611 |
| CASC1      | 28.3036307 | 0.83588267 | 0.0248677  | 0.15378959 |
| RASGRP2    | 176.279748 | -0.8094588 | 0.02487387 | 0.15378959 |
| TNRC6C-AS1 | 198.030914 | -0.6664214 | 0.02487094 | 0.15378959 |
| ALKBH2     | 114.721509 | -0.4273725 | 0.02489514 | 0.15382719 |
| CHRNA4     | 288.17689  | -1.1523238 | 0.02489744 | 0.15382719 |

|            |            |            |            |            |
|------------|------------|------------|------------|------------|
| ZNF546     | 165.652415 | 0.39003261 | 0.02490939 | 0.15384696 |
| DIRAS1     | 77.7489031 | -1.0126152 | 0.02493539 | 0.15395351 |
| DYRK4      | 192.386222 | 0.37751744 | 0.02495369 | 0.15395839 |
| RGS4       | 53.6046751 | -1.1017794 | 0.0249454  | 0.15395839 |
| DNAL4      | 97.5988329 | 0.53405591 | 0.02501194 | 0.1542096  |
| PEX7       | 70.3003815 | 0.5956695  | 0.0250054  | 0.1542096  |
| CEACAM6    | 3.84850366 | -1.1457879 | 0.02504195 | 0.15423244 |
| FKBP11     | 142.410464 | -0.5649392 | 0.02504012 | 0.15423244 |
| ZNF512B    | 1297.45608 | -0.5052564 | 0.02503787 | 0.15423244 |
| BBS2       | 813.156509 | 0.44257594 | 0.02507108 | 0.15435783 |
| DFFA       | 295.021968 | 0.2633908  | 0.02510681 | 0.15437473 |
| GABRA5     | 2.23299568 | -1.1433536 | 0.02510823 | 0.15437473 |
| SPON1      | 83.7748093 | 1.02299939 | 0.02510893 | 0.15437473 |
| UBXN8      | 108.287951 | 0.37822544 | 0.02509999 | 0.15437473 |
| MSR1       | 1058.78578 | 0.72843027 | 0.02512199 | 0.15440108 |
| FAM212B    | 76.9754028 | 0.70921322 | 0.02514672 | 0.15449908 |
| MTRNR2L3   | 4.75820798 | 0.99057467 | 0.0251707  | 0.15459242 |
| GIMAP4     | 355.441038 | 0.66622766 | 0.02518833 | 0.15464666 |
| CYP4X1     | 938.664431 | 0.75663067 | 0.02524846 | 0.15496178 |
| NDUFA13    | 1224.3029  | -0.3508613 | 0.02528273 | 0.15505052 |
| OR52N4     | 19.0507113 | 0.96210044 | 0.02528534 | 0.15505052 |
| SRSF2      | 2189.09344 | -0.2694978 | 0.02528937 | 0.15505052 |
| C17orf107  | 44.5371484 | 0.68707037 | 0.02536023 | 0.15518647 |
| CELF3      | 2.36237647 | -1.1357416 | 0.0253459  | 0.15518647 |
| CEP131     | 173.284962 | -0.4125684 | 0.02534825 | 0.15518647 |
| DNAH8      | 2.97277506 | 1.03698528 | 0.02536447 | 0.15518647 |
| GSTM3      | 570.017466 | 0.93505984 | 0.02532223 | 0.15518647 |
| POLR3GL    | 275.808552 | 0.33226503 | 0.02535631 | 0.15518647 |
| PXDC1      | 378.715458 | 0.606238   | 0.02537556 | 0.15520032 |
| CBLN2      | 3.50396524 | -1.1271331 | 0.0254001  | 0.15520941 |
| LOC1002892 | 123.724851 | 0.42897855 | 0.02540352 | 0.15520941 |
| TNKS1BP1   | 2269.88849 | -0.3589662 | 0.02538798 | 0.15520941 |
| KCNMB1     | 29.7300776 | 0.82805919 | 0.02542954 | 0.15531446 |
| C21orf88   | 4.73498468 | -1.1310868 | 0.02545958 | 0.15539629 |
| WDR77      | 299.634799 | 0.3492198  | 0.02546061 | 0.15539629 |
| SCUBE1     | 561.792019 | 1.11784517 | 0.0255059  | 0.15561873 |
| TRIM22     | 3397.81618 | 0.41917242 | 0.0255311  | 0.1556645  |
| WIPF1      | 879.757898 | 0.38065349 | 0.02552741 | 0.1556645  |
| ZFPL1      | 254.34515  | -0.2996507 | 0.02556815 | 0.1558364  |
| C9orf169   | 5.74325543 | -0.9932948 | 0.02559334 | 0.15593588 |
| TCERG1L    | 24.1384094 | -1.1434613 | 0.02563016 | 0.15610611 |
| EIF4E3     | 415.59589  | 0.62246327 | 0.02564533 | 0.15614444 |
| MCM3AP-AS  | 89.8398167 | -0.8048922 | 0.02565909 | 0.15617418 |
| KCNJ1      | 1.66869134 | 1.04822814 | 0.02567347 | 0.15620768 |
| POGK       | 872.557842 | -0.279723  | 0.02571025 | 0.15637734 |
| ZBED3      | 60.4511273 | -0.3853358 | 0.02572013 | 0.15638339 |
| TNFRSF10D  | 213.630845 | 1.00292328 | 0.02574641 | 0.15648906 |
| FCGR1C     | 30.8344835 | 0.91620667 | 0.02576576 | 0.1564985  |
| VWA3A      | 9.44019557 | 0.87480668 | 0.02576374 | 0.1564985  |
| CACNA1D    | 267.183799 | 1.11235995 | 0.02577625 | 0.1565082  |

|            |            |            |            |            |
|------------|------------|------------|------------|------------|
| HBP1       | 1237.41717 | 0.29896876 | 0.02579539 | 0.15656775 |
| UBA52      | 2931.52663 | 0.23771507 | 0.02580386 | 0.15656775 |
| ATM        | 4043.91455 | 0.34079683 | 0.02581785 | 0.15659862 |
| ADRA1B     | 51.1162006 | -0.8611527 | 0.02587593 | 0.1568968  |
| POLR2M     | 98.4387645 | -0.4558602 | 0.02592032 | 0.15705765 |
| XRRA1      | 425.14664  | -0.6242673 | 0.02591835 | 0.15705765 |
| EMC7       | 566.697185 | -0.3870794 | 0.02593311 | 0.15708104 |
| COL9A3     | 6248.50479 | -0.9808974 | 0.02595748 | 0.15717452 |
| SCRIB      | 891.784021 | -0.4183144 | 0.0259749  | 0.15722593 |
| CLMN       | 714.271167 | -0.8084335 | 0.02599032 | 0.15726513 |
| GINS4      | 36.760441  | -0.6529448 | 0.02600208 | 0.15728217 |
| GPC6       | 6561.57161 | 0.57116247 | 0.02605301 | 0.15742782 |
| LOC1019295 | 7.29771753 | 1.01892043 | 0.0260406  | 0.15742782 |
| THEMIS2    | 424.468815 | 0.69801603 | 0.02605024 | 0.15742782 |
| RNF141     | 615.8538   | 0.47416249 | 0.02609814 | 0.15759224 |
| ZBTB5      | 482.191018 | -0.4446893 | 0.02609235 | 0.15759224 |
| FAM193A    | 895.47397  | -0.3234247 | 0.02618395 | 0.15771084 |
| LOC1005062 | 13.9986733 | 0.83122506 | 0.0261434  | 0.15771084 |
| MRPS18C    | 131.12973  | 0.34838    | 0.02613491 | 0.15771084 |
| POU5F2     | 40.7168004 | 0.54938247 | 0.02617115 | 0.15771084 |
| PUS1       | 130.095275 | -0.4051939 | 0.02615847 | 0.15771084 |
| TPT1-AS1   | 113.807328 | 0.4690803  | 0.02617637 | 0.15771084 |
| TRIM17     | 116.772804 | -0.7323088 | 0.02617893 | 0.15771084 |
| XYLT2      | 741.474434 | -0.4147394 | 0.0261895  | 0.15771084 |
| CNOT11     | 502.878054 | -0.2876135 | 0.02624729 | 0.15800111 |
| SERPINA1   | 298.376605 | 0.78651925 | 0.02625567 | 0.15800111 |
| IMPG2      | 100.794061 | 0.88688016 | 0.02628053 | 0.15809663 |
| BMPR1B     | 2727.03093 | 1.07111363 | 0.0263257  | 0.158098   |
| CCDC88B    | 255.936706 | 0.78636288 | 0.02630318 | 0.158098   |
| NOL4L      | 765.960765 | -0.625692  | 0.02632077 | 0.158098   |
| PSIP1      | 1247.92096 | -0.5799651 | 0.02630986 | 0.158098   |
| SNCB       | 3.87176405 | -1.1418219 | 0.0263065  | 0.158098   |
| IL23R      | 4.07092125 | -1.1085575 | 0.02636111 | 0.15825662 |
| PPM1G      | 862.85844  | -0.358852  | 0.02640125 | 0.1584423  |
| ZFP64      | 389.735405 | -0.4007204 | 0.02641005 | 0.1584423  |
| CYP2W1     | 11.0921481 | -1.1280987 | 0.0264436  | 0.15854289 |
| EIF5A1     | 9.13049523 | -0.8427007 | 0.02644633 | 0.15854289 |
| STXBP3     | 488.77292  | 0.43334598 | 0.02645386 | 0.15854289 |
| CCNG1      | 3311.98823 | 0.44737807 | 0.02648987 | 0.15865061 |
| HPCA       | 7.76732242 | -0.9691779 | 0.02648832 | 0.15865061 |
| MSL3       | 298.231517 | 0.37019851 | 0.02652114 | 0.15875414 |
| TRRAP      | 2865.81864 | -0.344306  | 0.02652521 | 0.15875414 |
| NAA25      | 753.750742 | -0.2631373 | 0.02653889 | 0.158782   |
| HAUS2      | 350.305215 | 0.34815602 | 0.02659978 | 0.15897173 |
| QRSL1      | 223.784069 | 0.47774179 | 0.02660254 | 0.15897173 |
| TMEM68     | 186.468122 | 0.35971445 | 0.02660675 | 0.15897173 |
| ZNF317     | 554.586607 | 0.33993845 | 0.02660532 | 0.15897173 |
| PCDHGB8P   | 247.892311 | -0.661721  | 0.02664922 | 0.15917141 |
| ABCC13     | 9.91086527 | -1.1199972 | 0.0266788  | 0.15926083 |
| PIBF1      | 531.853085 | 0.27493446 | 0.0266823  | 0.15926083 |

|             |            |            |            |            |
|-------------|------------|------------|------------|------------|
| FHOD3       | 25.1216789 | 1.05159592 | 0.02671264 | 0.15938784 |
| S100A11     | 2528.49259 | -0.4666436 | 0.02674134 | 0.15950498 |
| PCDHGA11    | 406.266932 | -0.7044908 | 0.02680401 | 0.15982457 |
| WDR76       | 105.067775 | -0.6703798 | 0.02687693 | 0.16020507 |
| NINL        | 1060.69833 | -0.645837  | 0.02689682 | 0.16026934 |
| FLI1        | 399.182654 | 0.60217416 | 0.02695677 | 0.16057218 |
| HHIP        | 220.070093 | -1.1368159 | 0.02698575 | 0.16068245 |
| TMEM205     | 1267.06015 | -0.5715378 | 0.02699356 | 0.16068245 |
| ANP32E      | 778.050563 | -0.3687404 | 0.02703845 | 0.16082334 |
| CXCL12      | 1151.4586  | -0.9802053 | 0.02704465 | 0.16082334 |
| NPDC1       | 844.466149 | -0.4467566 | 0.02702755 | 0.16082334 |
| BRSK2       | 19.4516827 | -0.8928752 | 0.02707842 | 0.1609697  |
| LOC1005063  | 42.2408272 | 0.92148527 | 0.0270994  | 0.1609917  |
| PPM1F       | 557.030729 | 0.38807088 | 0.02710042 | 0.1609917  |
| BNIP3L      | 2888.18182 | 0.42287329 | 0.02712887 | 0.16104711 |
| ELFN1       | 192.105627 | -1.0548402 | 0.02714089 | 0.16104711 |
| KCNE4       | 910.938561 | 0.8184689  | 0.02717426 | 0.16104711 |
| LOC1002893  | 3.65888864 | 0.77170552 | 0.02712611 | 0.16104711 |
| NNT         | 2012.74394 | -0.44773   | 0.02714812 | 0.16104711 |
| PCNXL4      | 767.70695  | 0.4052282  | 0.02718299 | 0.16104711 |
| SLC44A1     | 2188.60549 | 0.71670672 | 0.02715878 | 0.16104711 |
| TMCC3       | 593.457182 | 0.55934362 | 0.02716564 | 0.16104711 |
| STX10       | 249.606799 | 0.29296826 | 0.02720694 | 0.1611347  |
| PTGER4      | 287.041525 | 0.80325511 | 0.02724066 | 0.16128012 |
| NOP16       | 129.626899 | -0.5198744 | 0.02728799 | 0.161506   |
| CD302       | 34.2334405 | -0.7118044 | 0.02731482 | 0.16159743 |
| CD3D        | 6.44875466 | 1.0321086  | 0.02732182 | 0.16159743 |
| SURF4       | 3192.58501 | -0.3281438 | 0.02733959 | 0.16164819 |
| WDR11       | 1404.88891 | 0.42839271 | 0.02736569 | 0.16174812 |
| GPR65       | 100.592914 | 0.87769344 | 0.02740787 | 0.16184458 |
| INTS5       | 343.470111 | -0.334577  | 0.02740098 | 0.16184458 |
| TIMM50      | 368.787123 | -0.2898311 | 0.02740961 | 0.16184458 |
| MID1IP1-AS1 | 4.0315716  | -1.0406273 | 0.02742557 | 0.16188447 |
| SLC9A7P1    | 66.4332862 | 0.72254207 | 0.0274723  | 0.16210593 |
| GPR83       | 110.799199 | -1.061605  | 0.02752751 | 0.16237722 |
| ACTR3       | 2010.18188 | 0.19628702 | 0.0275817  | 0.16241852 |
| C10orf82    | 8.20135732 | 1.13258356 | 0.02756388 | 0.16241852 |
| DDX50       | 510.400789 | 0.40188679 | 0.02758221 | 0.16241852 |
| KIAA1456    | 13.5431182 | -1.0575453 | 0.02759399 | 0.16241852 |
| PCDHGB3     | 414.513982 | -0.7505127 | 0.02759059 | 0.16241852 |
| POC1B       | 272.459075 | 0.34291534 | 0.02754732 | 0.16241852 |
| ZNF234      | 340.928081 | 0.32071836 | 0.02759915 | 0.16241852 |
| SMAP2       | 899.172315 | 0.70973784 | 0.02762711 | 0.16252875 |
| SEPT2       | 6654.54726 | -0.2399425 | 0.02767938 | 0.1627818  |
| ZNF410      | 422.99054  | 0.3810601  | 0.02774258 | 0.16309894 |
| HIST1H2BD   | 530.098323 | -0.5058976 | 0.02778012 | 0.16323475 |
| LOC1001333  | 74.493895  | -0.6190639 | 0.02778424 | 0.16323475 |
| CD3E        | 13.4113154 | 0.87031798 | 0.02779487 | 0.16324266 |
| PIANP       | 18.4967091 | -1.062605  | 0.02780528 | 0.16324926 |
| CHN2        | 249.134431 | 0.96059354 | 0.02784764 | 0.16327737 |

|            |            |            |            |            |
|------------|------------|------------|------------|------------|
| ESCO1      | 489.537497 | 0.41468945 | 0.02784541 | 0.16327737 |
| LAT2       | 220.134347 | 0.70358483 | 0.02782845 | 0.16327737 |
| PRDX5      | 1532.10664 | -0.3608196 | 0.0278558  | 0.16327737 |
| SFT2D1     | 174.495408 | 0.41335699 | 0.02785647 | 0.16327737 |
| RAB40C     | 274.767777 | -0.3915956 | 0.02788504 | 0.16339038 |
| BPTF       | 4669.05615 | -0.2799034 | 0.02792201 | 0.16355251 |
| DUSP1      | 7492.72554 | 0.78348026 | 0.02797901 | 0.16365568 |
| ESM1       | 155.765628 | 1.06828597 | 0.02797515 | 0.16365568 |
| SNX29      | 1240.76013 | 0.47348331 | 0.02797685 | 0.16365568 |
| TMEM123    | 1814.10183 | 0.40987926 | 0.02798614 | 0.16365568 |
| ZNF787     | 220.876341 | -0.3492417 | 0.02797185 | 0.16365568 |
| HUWE1      | 9506.2104  | -0.2447647 | 0.02801601 | 0.16377588 |
| LOC1005075 | 22.1026642 | -0.5686124 | 0.02807752 | 0.16403754 |
| RPH3A      | 3.9366871  | -1.1283025 | 0.02807942 | 0.16403754 |
| FLJ46906   | 10.8813784 | 1.00488173 | 0.02812255 | 0.16423497 |
| TGFB1      | 576.476332 | -0.5281176 | 0.02814227 | 0.16424108 |
| TRMU       | 118.037643 | 0.40491109 | 0.02814208 | 0.16424108 |
| IGHMBP2    | 270.8365   | -0.2688781 | 0.0281891  | 0.16441036 |
| PILRA      | 131.586353 | 0.72072985 | 0.02818997 | 0.16441036 |
| EOGT       | 393.790787 | 0.61358677 | 0.0282498  | 0.16465011 |
| OSMR-AS1   | 7.91703707 | 1.01249963 | 0.02824186 | 0.16465011 |
| DOT1L      | 576.888173 | -0.3354427 | 0.02828854 | 0.16482127 |
| SNAP91     | 71.0201676 | 0.97791056 | 0.02830237 | 0.16484726 |
| DNAJB6     | 1192.94204 | -0.2964111 | 0.02833047 | 0.16486459 |
| NAGA       | 591.716232 | 0.37433655 | 0.02833347 | 0.16486459 |
| NFATC1     | 129.732068 | 0.58047043 | 0.02831591 | 0.16486459 |
| LBX1-AS1   | 3.679529   | -1.0968739 | 0.02835968 | 0.16490799 |
| SEMA3E     | 3.91887352 | 1.09498066 | 0.02835654 | 0.16490799 |
| DPP3       | 380.302438 | -0.4115593 | 0.02841588 | 0.16512564 |
| MANBA      | 533.875633 | 0.34471959 | 0.02841451 | 0.16512564 |
| METTL4     | 164.602419 | 0.50706147 | 0.02845029 | 0.16525399 |
| OVCA2      | 19.4184318 | -0.6708207 | 0.02846615 | 0.16525399 |
| PTPRN      | 4.60730744 | -1.1257652 | 0.02846615 | 0.16525399 |
| SSTR5-AS1  | 1.83224796 | -1.1186978 | 0.02848901 | 0.1653321  |
| POLE2      | 23.4462566 | -0.7359222 | 0.02852734 | 0.16549995 |
| PODN       | 622.082773 | 0.76903738 | 0.02854791 | 0.16556473 |
| SLC27A1    | 742.295981 | -0.4116786 | 0.02856847 | 0.16562935 |
| EID2B      | 63.4597201 | 0.53289453 | 0.02868274 | 0.16612756 |
| RFXAP      | 148.167664 | -0.3789686 | 0.02868054 | 0.16612756 |
| TIAF1      | 10.9690782 | 0.77165614 | 0.02867188 | 0.16612756 |
| ITM2C      | 13078.7078 | -0.7935026 | 0.02869633 | 0.16615154 |
| CDC5L      | 972.694789 | 0.33199143 | 0.02874702 | 0.16628087 |
| CXADRP2    | 3.28719766 | -1.1089757 | 0.02873715 | 0.16628087 |
| SNORA65    | 8.40709296 | -0.9584085 | 0.02873806 | 0.16628087 |
| ANAPC4     | 398.316195 | 0.26321212 | 0.02877808 | 0.16635974 |
| DSCAML1    | 13.352528  | -1.0753777 | 0.02877957 | 0.16635974 |
| ATP5L      | 1058.48455 | -0.3328036 | 0.02892428 | 0.16683959 |
| CNOT6L     | 1008.02742 | 0.33633741 | 0.02891346 | 0.16683959 |
| COX4I1     | 2023.5     | -0.4385468 | 0.02892139 | 0.16683959 |
| HMGB3      | 131.329332 | -0.6484016 | 0.02889481 | 0.16683959 |

|            |            |            |            |            |
|------------|------------|------------|------------|------------|
| LOC1019272 | 7.15939356 | 0.87269207 | 0.02892898 | 0.16683959 |
| RASL12     | 36.4137269 | 0.92471017 | 0.02891057 | 0.16683959 |
| RNF13      | 1301.47742 | 0.22774876 | 0.02888438 | 0.16683959 |
| LRP2BP     | 60.521462  | 0.81551396 | 0.02893869 | 0.16684088 |
| NBPF1      | 989.623941 | 0.59966667 | 0.02894826 | 0.1668414  |
| WHAMMP1    | 136.833587 | 0.37760056 | 0.02898219 | 0.16698221 |
| PNMAL2     | 94.9021033 | 0.81580626 | 0.0290024  | 0.16704392 |
| B4GALT3    | 295.295686 | -0.3721747 | 0.02901529 | 0.16706348 |
| PIGK       | 505.13983  | 0.37318197 | 0.02904211 | 0.16716322 |
| OTOG       | 473.274579 | -1.119898  | 0.02905393 | 0.16717653 |
| LINC01234  | 14.1245046 | -1.061757  | 0.02906533 | 0.16718745 |
| GHR        | 691.091394 | 0.60880065 | 0.02907958 | 0.16721474 |
| DEF6       | 174.986212 | 0.57853519 | 0.02916061 | 0.16762584 |
| PODXL      | 4296.30291 | -0.7238078 | 0.0292076  | 0.16784114 |
| FAHD2A     | 127.508966 | 0.42131716 | 0.02922801 | 0.16790356 |
| BET1       | 216.646252 | 0.25771761 | 0.02927019 | 0.16792648 |
| COX17      | 236.768026 | -0.4153693 | 0.02926576 | 0.16792648 |
| MFSD1      | 1012.67974 | 0.34185674 | 0.0292559  | 0.16792648 |
| PUS10      | 93.508515  | 0.43403127 | 0.0292596  | 0.16792648 |
| NSDHL      | 188.753146 | -0.4487803 | 0.02931038 | 0.16810227 |
| MET        | 3786.49178 | -0.9145013 | 0.02935257 | 0.16828933 |
| LINC00909  | 185.188974 | 0.50814188 | 0.02939889 | 0.16844509 |
| VAT1       | 1774.53022 | 0.52731957 | 0.02939558 | 0.16844509 |
| IL10       | 8.13968759 | 1.0691232  | 0.02940979 | 0.16845271 |
| CCDC40     | 143.391138 | 0.70099364 | 0.0295303  | 0.1690879  |
| MTRNR2L2   | 4035.9529  | -0.645655  | 0.0295725  | 0.16921934 |
| TMC8       | 132.888408 | 0.64000729 | 0.02957159 | 0.16921934 |
| TSPAN7     | 998.37661  | 0.99725953 | 0.0295925  | 0.1692787  |
| TMEM189    | 426.044526 | -0.5644965 | 0.02960248 | 0.16928077 |
| PRICKLE2   | 444.677456 | 0.70686218 | 0.02961451 | 0.16929452 |
| KCNG3      | 11.0582523 | -1.0844917 | 0.02964464 | 0.1693567  |
| TVP23C     | 292.369093 | 0.47218982 | 0.0296365  | 0.1693567  |
| HAUS7      | 306.015746 | 0.53091429 | 0.02979227 | 0.17003443 |
| NTNG1      | 14.7366704 | -1.1142105 | 0.0297737  | 0.17003443 |
| TAS2R10    | 23.4643085 | 0.64988157 | 0.02978477 | 0.17003443 |
| C20orf196  | 20.7150415 | 0.66849375 | 0.02981209 | 0.17009235 |
| HIST1H2BF  | 92.6572201 | -0.7292934 | 0.02983294 | 0.17010094 |
| UBQLN2     | 913.922869 | -0.302505  | 0.02982782 | 0.17010094 |
| RILPL1     | 318.924933 | -0.393818  | 0.02990284 | 0.17044423 |
| SUCLG1     | 629.383775 | -0.3641999 | 0.02994308 | 0.17061832 |
| XRCC4      | 109.345222 | 0.46406546 | 0.02996509 | 0.17068848 |
| INPP5E     | 277.99569  | -0.3374869 | 0.03000134 | 0.1707843  |
| RASGRP1    | 26.7995425 | 0.86912732 | 0.02999801 | 0.1707843  |
| CCRN4L     | 45.1436851 | -0.7614147 | 0.0300401  | 0.17083923 |
| GNPDA1     | 344.247953 | 0.30955905 | 0.03004563 | 0.17083923 |
| RNF180     | 246.898602 | 0.9234869  | 0.03002583 | 0.17083923 |
| ZNF587     | 1545.35482 | -0.3317432 | 0.03004983 | 0.17083923 |
| RELA       | 831.711381 | -0.3298157 | 0.03006912 | 0.17089364 |
| PEF1       | 536.619055 | 0.40112052 | 0.03008207 | 0.17091201 |
| HIP1R      | 338.627001 | -0.6438153 | 0.03011    | 0.17096026 |

|           |            |            |            |            |
|-----------|------------|------------|------------|------------|
| TFIP11    | 283.15955  | 0.39011716 | 0.03010662 | 0.17096026 |
| TMSB15A   | 3.64763739 | -0.987224  | 0.03012839 | 0.17100948 |
| DUOX1     | 173.23759  | 1.11073896 | 0.03014321 | 0.17101161 |
| NAA30     | 386.96055  | 0.37661969 | 0.03014821 | 0.17101161 |
| ZNF711    | 230.818554 | -0.813662  | 0.03016112 | 0.17102969 |
| CDK8      | 157.394771 | -0.435108  | 0.03018691 | 0.17106563 |
| CYP20A1   | 932.373623 | 0.27884846 | 0.0301859  | 0.17106563 |
| HDAC5     | 769.72435  | 0.34016595 | 0.03023691 | 0.17129379 |
| ALDH1B1   | 219.257299 | -0.6200088 | 0.03025211 | 0.17132475 |
| CD2BP2    | 823.19129  | 0.23560402 | 0.03030749 | 0.17158313 |
| CRNKL1    | 801.232045 | 0.32967752 | 0.03034933 | 0.17172187 |
| METTL25   | 122.073482 | 0.42272799 | 0.03035152 | 0.17172187 |
| PSENNEN   | 209.786636 | 0.34509128 | 0.03037458 | 0.17179704 |
| ACCS      | 220.670213 | 0.58786464 | 0.03038734 | 0.17181398 |
| AMZ2      | 601.949723 | -0.2818465 | 0.03048662 | 0.17196491 |
| C19orf25  | 223.065895 | 0.42805391 | 0.03047761 | 0.17196491 |
| H6PD      | 1658.42389 | 0.50826782 | 0.03049792 | 0.17196491 |
| LINC00612 | 6.99805088 | -0.8614238 | 0.03050202 | 0.17196491 |
| LOC644936 | 2.66246472 | 1.06217604 | 0.0304656  | 0.17196491 |
| NDUFS2    | 859.577747 | -0.4464326 | 0.03049117 | 0.17196491 |
| PUF60     | 901.996494 | -0.2671176 | 0.03047638 | 0.17196491 |
| SALL1     | 208.365536 | -1.0785112 | 0.03048636 | 0.17196491 |
| WDR78     | 90.1347772 | 0.87971756 | 0.03046039 | 0.17196491 |
| GFM1      | 844.680282 | -0.315205  | 0.03052135 | 0.17201877 |
| ARHGEF3   | 836.827019 | 0.80430297 | 0.03064004 | 0.1726324  |
| ASGR2     | 3.87258022 | 0.98763016 | 0.03065732 | 0.17266609 |
| RAB13     | 604.137322 | -0.3989106 | 0.03066565 | 0.17266609 |
| ESYT3     | 141.968844 | 0.91256672 | 0.03069444 | 0.17277284 |
| ARHGDI3   | 23.3948858 | 0.9970966  | 0.03076915 | 0.17299132 |
| DMGDH     | 173.029029 | 0.87560219 | 0.03074563 | 0.17299132 |
| SPDYE5    | 1.29350774 | 1.08653105 | 0.03077255 | 0.17299132 |
| WBP1L     | 4773.91336 | 0.68206694 | 0.03077259 | 0.17299132 |
| VTN       | 240.947162 | -0.8342588 | 0.03078351 | 0.17299742 |
| C19orf38  | 17.836551  | 0.84027668 | 0.03084129 | 0.1732668  |
| LYRM7     | 430.199442 | 0.47380661 | 0.03091072 | 0.17354598 |
| NCOR2     | 4192.57968 | -0.4276492 | 0.03090904 | 0.17354598 |
| ZDHHC22   | 2.45186915 | -1.0717136 | 0.03092205 | 0.17355421 |
| CACNA1B   | 12.110647  | -0.9081087 | 0.030969   | 0.17376228 |
| ENO4      | 13.7807625 | 0.82952585 | 0.03099041 | 0.17382694 |
| TBXAS1    | 334.417678 | 0.7152917  | 0.03105799 | 0.17415046 |
| CILP2     | 52.3717697 | 1.06538786 | 0.03107177 | 0.17417221 |
| CLCN4     | 329.723817 | -0.5679338 | 0.0310876  | 0.17419725 |
| FAM71F1   | 3.1376057  | 1.03415403 | 0.03109604 | 0.17419725 |
| NTMT1     | 146.77866  | -0.2915894 | 0.03111467 | 0.17424609 |
| CD276     | 1170.14917 | -0.5967627 | 0.03114543 | 0.17436285 |
| LOC652276 | 85.0059607 | -0.4764863 | 0.03116345 | 0.17440821 |
| ANKS6     | 806.123298 | -0.436248  | 0.03123009 | 0.17441361 |
| ECM1      | 62.8492554 | -0.8872053 | 0.03130132 | 0.17441361 |
| GEN1      | 272.513514 | -0.5440266 | 0.03119013 | 0.17441361 |
| GRAMD4    | 283.546265 | 0.43792073 | 0.03125754 | 0.17441361 |

|            |            |            |            |            |
|------------|------------|------------|------------|------------|
| GTPBP10    | 423.784126 | 0.23817469 | 0.03126505 | 0.17441361 |
| HIST1H2BN  | 140.681304 | -0.5825545 | 0.03130344 | 0.17441361 |
| IRF6       | 6.15154371 | 0.88946556 | 0.03121746 | 0.17441361 |
| ISCU       | 876.125392 | 0.32981693 | 0.03129872 | 0.17441361 |
| LOC1002870 | 26.4423378 | 0.56295445 | 0.03120877 | 0.17441361 |
| MICAL2     | 1292.24519 | -0.5628925 | 0.03125521 | 0.17441361 |
| PIP4K2A    | 457.155895 | 0.39182826 | 0.03132231 | 0.17441361 |
| RARRES3    | 188.781149 | 0.68022878 | 0.03124801 | 0.17441361 |
| RFX3       | 388.369445 | 0.50940111 | 0.03127838 | 0.17441361 |
| RFX7       | 824.340803 | -0.3817781 | 0.03130986 | 0.17441361 |
| SPCS2      | 518.43151  | -0.3386513 | 0.03132306 | 0.17441361 |
| STX12      | 748.963295 | 0.46785429 | 0.03131391 | 0.17441361 |
| LSM10      | 118.828753 | -0.5171565 | 0.03133444 | 0.17442178 |
| C9orf89    | 89.2909417 | -0.4393479 | 0.03134944 | 0.17445004 |
| KIF24      | 84.7203209 | -0.55177   | 0.03142888 | 0.1748368  |
| ME3        | 137.353629 | 0.56695763 | 0.03147715 | 0.17495662 |
| NRP2       | 3637.59713 | 0.86200226 | 0.03147981 | 0.17495662 |
| RBMX2      | 182.230601 | 0.31805964 | 0.03148026 | 0.17495662 |
| ABCC4      | 931.105552 | -0.96013   | 0.03156169 | 0.17529843 |
| SLC24A2    | 5.71164845 | -1.1042249 | 0.03155433 | 0.17529843 |
| BMP1       | 1151.79766 | -0.5437435 | 0.03159482 | 0.17542706 |
| CCR4       | 3.84773713 | 1.02757788 | 0.03161382 | 0.17547713 |
| LRRCS8     | 1464.17826 | -0.2472066 | 0.03164093 | 0.17557222 |
| BAI3       | 48.6417289 | 0.94992779 | 0.03167559 | 0.17561387 |
| MAP2K3     | 343.765625 | -0.5134735 | 0.03166139 | 0.17561387 |
| PELO       | 533.484203 | 0.46008963 | 0.03167839 | 0.17561387 |
| CD53       | 452.935995 | 0.67061235 | 0.03170097 | 0.17568368 |
| FBXO10     | 259.360952 | -0.4955109 | 0.03174361 | 0.17581187 |
| NUGGC      | 3.90558258 | 1.00413896 | 0.03174409 | 0.17581187 |
| SERPINE1   | 306.074725 | 1.00183726 | 0.03175489 | 0.17581635 |
| TUBGCP4    | 352.381663 | -0.3368594 | 0.03178082 | 0.17590456 |
| DCP2       | 1396.74078 | 0.40081357 | 0.03187979 | 0.17639684 |
| ADM5       | 17.1412735 | -0.8457618 | 0.03190285 | 0.17641344 |
| LOC1005056 | 1.72240681 | 1.08174437 | 0.03189575 | 0.17641344 |
| RAB24      | 751.33496  | -0.5462763 | 0.03194533 | 0.17659281 |
| FRY        | 707.948603 | 0.86877996 | 0.03197175 | 0.17668332 |
| SNORA31    | 4.52467172 | 0.72050402 | 0.03198619 | 0.17670761 |
| PCDH7      | 23.1111336 | -1.071513  | 0.03204555 | 0.17697996 |
| SCN2B      | 182.000489 | 1.07959073 | 0.03207093 | 0.177009   |
| SNRNP40    | 297.750659 | 0.39320531 | 0.03206283 | 0.177009   |
| SSPO       | 404.676972 | -0.6946385 | 0.03209044 | 0.17706113 |
| FCN1       | 10.0013606 | 0.99187656 | 0.03214176 | 0.17719196 |
| HIST1H2BB  | 54.0646522 | -0.7670903 | 0.03214323 | 0.17719196 |
| TMEM156    | 31.4381538 | 1.01869706 | 0.03214437 | 0.17719196 |
| RAB14      | 1875.80057 | -0.2381738 | 0.03215875 | 0.17721566 |
| LRRRC14    | 482.228933 | -0.3283456 | 0.03220615 | 0.17742128 |
| SYT15      | 378.871655 | 0.91814328 | 0.03224128 | 0.17755922 |
| OSTF1      | 245.924006 | 0.3484874  | 0.0322648  | 0.17763315 |
| DEPDC5     | 269.424119 | -0.3478477 | 0.03228715 | 0.17763534 |
| FBXO48     | 12.9345857 | 0.69341235 | 0.03228832 | 0.17763534 |



|            |            |            |            |            |
|------------|------------|------------|------------|------------|
| ZNF517     | 61.9434893 | -0.3837463 | 0.0322955  | 0.17763534 |
| LOC1001323 | 69.6990163 | 0.29728877 | 0.03239247 | 0.178113   |
| LYN        | 402.699487 | 0.50799352 | 0.03242975 | 0.17825061 |
| MKRN3      | 4.24995195 | -1.0424549 | 0.03243776 | 0.17825061 |
| CRLF1      | 248.964644 | 1.03012065 | 0.03245443 | 0.17828651 |
| LIN9       | 76.309942  | -0.5225343 | 0.03247641 | 0.1783422  |
| LOC1004994 | 30.0456093 | 0.50349443 | 0.0325041  | 0.1783422  |
| NDFIP1     | 2192.6226  | 0.40233904 | 0.03251526 | 0.1783422  |
| PLXDC2     | 3154.35294 | 0.69834144 | 0.03250809 | 0.1783422  |
| ZFP91      | 1287.08299 | -0.2351078 | 0.03249996 | 0.1783422  |
| AGPAT9     | 64.6733205 | 0.77949422 | 0.03256409 | 0.17855437 |
| CTNND1     | 172.065796 | 0.27888455 | 0.03261324 | 0.17876812 |
| PCSK2      | 11.1163616 | -1.0961643 | 0.0326917  | 0.17911298 |
| RIN1       | 53.1149554 | -0.7976736 | 0.03269652 | 0.17911298 |
| LINC01184  | 240.921035 | 0.35769307 | 0.03272727 | 0.17920309 |
| MAPK1      | 1929.93216 | 0.25506157 | 0.03273334 | 0.17920309 |
| TOB1       | 2165.06113 | -0.6034116 | 0.03274796 | 0.1792273  |
| CTDSPL     | 809.024127 | 0.63562442 | 0.03279206 | 0.17941283 |
| FAM228B    | 117.273444 | 0.55137253 | 0.03280394 | 0.17942202 |
| HLA-DQA2   | 1.93300648 | 1.0196172  | 0.03283356 | 0.17952825 |
| RNF187     | 1260.21689 | -0.3202939 | 0.03285141 | 0.17957002 |
| CCSER1     | 66.246113  | -0.9081541 | 0.03287274 | 0.17963077 |
| COMMD6     | 447.819947 | 0.41128095 | 0.03292146 | 0.17982287 |
| NPW        | 46.2574119 | -1.0619165 | 0.03292834 | 0.17982287 |
| CCDC11     | 9.89179026 | 0.79446971 | 0.03294903 | 0.17988001 |
| ABO        | 37.1507997 | 1.02831065 | 0.03299886 | 0.1799194  |
| BAIAP2     | 447.725488 | -0.617979  | 0.0330483  | 0.1799194  |
| CCDC81     | 19.2079182 | 0.86590284 | 0.0330434  | 0.1799194  |
| CDHR2      | 3.20363096 | -0.9681638 | 0.03303407 | 0.1799194  |
| CLDN10     | 1.40248455 | -1.0721677 | 0.03304108 | 0.1799194  |
| DOPEY1     | 1033.41719 | 0.5325941  | 0.03303341 | 0.1799194  |
| LOC1027248 | 51.8760487 | 0.51298695 | 0.03299557 | 0.1799194  |
| SNRPA1     | 166.501535 | -0.496145  | 0.03302232 | 0.1799194  |
| TEAD4      | 128.262172 | -0.5721367 | 0.03301015 | 0.1799194  |
| ABI1       | 698.71873  | 0.25639172 | 0.03307471 | 0.18000745 |
| G3BP2      | 2209.21759 | -0.3533426 | 0.03308693 | 0.18001828 |
| C18orf25   | 558.110326 | 0.47547702 | 0.03314448 | 0.18026072 |
| IFNLR1     | 85.3819315 | 0.77819537 | 0.03319298 | 0.18026072 |
| KCNH8      | 2.04743478 | -1.0932273 | 0.03318963 | 0.18026072 |
| LOC1001293 | 415.367903 | -0.4100526 | 0.03318293 | 0.18026072 |
| PRDM11     | 487.865278 | -0.5375927 | 0.03317228 | 0.18026072 |
| YPEL3      | 427.022497 | 0.42326085 | 0.03316416 | 0.18026072 |
| CSDC2      | 135.867506 | -0.9461617 | 0.03322839 | 0.18036225 |
| GOLGA8M    | 31.7201046 | 0.9422689  | 0.03323218 | 0.18036225 |
| KNTC1      | 580.388023 | -0.4726416 | 0.03327709 | 0.18055029 |
| COL23A1    | 44.760332  | 1.07264056 | 0.03335938 | 0.18074813 |
| NEO1       | 5202.04336 | -0.5467622 | 0.03336493 | 0.18074813 |
| TMEM151B   | 9.77858524 | -0.9935044 | 0.03333651 | 0.18074813 |
| XAB2       | 533.88947  | 0.31885456 | 0.03332679 | 0.18074813 |
| ZMIZ1      | 3422.92943 | -0.5567616 | 0.03336251 | 0.18074813 |

|            |            |            |            |            |
|------------|------------|------------|------------|------------|
| LOC1009964 | 10.7234824 | 0.95626017 | 0.03338039 | 0.18077622 |
| ANKRD6     | 202.290736 | 0.65527321 | 0.03341383 | 0.18090159 |
| TECR       | 954.703161 | -0.5489734 | 0.03344337 | 0.18100583 |
| ATG10      | 104.453903 | 0.47734184 | 0.03354416 | 0.1813325  |
| LOC1019287 | 20.2783723 | 0.8804373  | 0.03354497 | 0.1813325  |
| RABGAP1    | 1955.6251  | -0.255677  | 0.03353026 | 0.1813325  |
| SGMS1      | 741.496264 | 0.40037615 | 0.03353033 | 0.1813325  |
| CAMSAP1    | 868.927633 | -0.2932902 | 0.03362455 | 0.181353   |
| CEP85L     | 421.316696 | 0.50329699 | 0.03357481 | 0.181353   |
| HEATR2     | 281.816632 | -0.3426524 | 0.03363124 | 0.181353   |
| HIST1H2BI  | 126.67062  | -0.6202905 | 0.03360918 | 0.181353   |
| IL7R       | 48.2315128 | 0.84489683 | 0.03361239 | 0.181353   |
| JMJD1C     | 3772.04454 | 0.39092644 | 0.03358362 | 0.181353   |
| RPL5       | 4729.8575  | 0.41238728 | 0.03363116 | 0.181353   |
| TGIF2      | 371.323904 | -0.4883932 | 0.03358205 | 0.181353   |
| ALDH3A1    | 4.54017626 | -1.0376907 | 0.03364583 | 0.18137606 |
| CDK10      | 325.990868 | -0.3472637 | 0.03368981 | 0.1815575  |
| PLEKHA1    | 1108.19914 | 0.52746141 | 0.03371106 | 0.18161637 |
| EMBP1      | 13.8229289 | 0.77142541 | 0.03373858 | 0.1816534  |
| SEC1P      | 3.8205024  | 0.98780588 | 0.03373639 | 0.1816534  |
| PLXNB3     | 29.1759803 | -0.8990754 | 0.03376365 | 0.18173274 |
| KANK4      | 21.3621067 | -1.0016096 | 0.03379338 | 0.18183713 |
| HS6ST1     | 768.545759 | -0.6083433 | 0.03380969 | 0.1818407  |
| SMAGP      | 131.47637  | -0.9389578 | 0.03381472 | 0.1818407  |
| SRPRB      | 848.727959 | -0.4258988 | 0.03383713 | 0.18190561 |
| KRTCAP3    | 8.42610799 | -0.8187264 | 0.03386578 | 0.18200401 |
| FAM155B    | 12.7648467 | -0.7950002 | 0.03405004 | 0.18293835 |
| LRRC4B     | 129.584642 | -1.0569176 | 0.03408689 | 0.18308042 |
| VWDE       | 2.37069831 | -1.0831157 | 0.03412615 | 0.18323534 |
| MAGI2-AS3  | 1724.82006 | 0.37579095 | 0.03421856 | 0.18367543 |
| LMCD1-AS1  | 13.0897049 | 0.98280066 | 0.03424492 | 0.18376085 |
| HSPA7      | 340.107917 | 0.88503348 | 0.03433164 | 0.18382717 |
| NPIPB5     | 76.8335512 | -0.6000502 | 0.03434088 | 0.18382717 |
| PCDHGA6    | 633.870053 | -0.7647559 | 0.03429779 | 0.18382717 |
| PDIA3      | 5616.31562 | -0.360936  | 0.03432924 | 0.18382717 |
| PPP1R16A   | 271.313049 | -0.3974664 | 0.03430658 | 0.18382717 |
| PSMB10     | 234.078427 | 0.43911056 | 0.03433302 | 0.18382717 |
| SYK        | 593.574212 | 0.58962207 | 0.03430571 | 0.18382717 |
| ZNF7       | 305.422935 | -0.3026624 | 0.03432597 | 0.18382717 |
| ALKBH6     | 63.0773505 | -0.3576773 | 0.03437414 | 0.18394924 |
| PATL2      | 9.53630374 | 0.82083102 | 0.03440746 | 0.18407154 |
| LOC400927  | 12.2044679 | 0.60639757 | 0.03453293 | 0.18437055 |
| NCKIPSD    | 573.664194 | -0.4279261 | 0.03448509 | 0.18437055 |
| NRBP1      | 1147.93452 | -0.3571549 | 0.03453047 | 0.18437055 |
| PIK3C2B    | 2567.56678 | -0.5275716 | 0.03448167 | 0.18437055 |
| PRKD1      | 96.6698443 | 0.85757647 | 0.03454318 | 0.18437055 |
| RASSF2     | 5738.17722 | 0.80703378 | 0.03454118 | 0.18437055 |
| TMOD2      | 854.467629 | 0.50133768 | 0.03451156 | 0.18437055 |
| ZNF181     | 362.187515 | 0.28114218 | 0.0345472  | 0.18437055 |
| LINC00884  | 2.61937694 | 0.97881289 | 0.03455814 | 0.18437296 |

|            |            |            |            |            |
|------------|------------|------------|------------|------------|
| PARP1      | 2115.88668 | -0.3213802 | 0.03458727 | 0.18443928 |
| TMEM186    | 88.5775628 | -0.3714566 | 0.03459154 | 0.18443928 |
| MOK        | 138.18863  | 0.63237057 | 0.03462027 | 0.18453651 |
| FOXD3      | 8.80665725 | -1.0088846 | 0.03464739 | 0.1846245  |
| WNK2       | 226.685623 | -1.0288439 | 0.03465777 | 0.1846245  |
| CTLA4      | 4.90382073 | 1.04291001 | 0.03467598 | 0.18466561 |
| SETD8      | 586.246464 | -0.3872122 | 0.03471362 | 0.1848101  |
| CHRD1      | 49.5530635 | -0.9703618 | 0.03474019 | 0.18489561 |
| CCDC89     | 35.7866377 | -0.7258092 | 0.03480719 | 0.18511619 |
| LSR        | 611.919003 | -0.7084122 | 0.03481321 | 0.18511619 |
| MAN1C1     | 2141.05434 | 0.62092849 | 0.03480688 | 0.18511619 |
| LOC1019283 | 4.94811841 | 0.98582517 | 0.03485229 | 0.18526802 |
| CENPT      | 472.353609 | -0.2604288 | 0.0349085  | 0.18534275 |
| FAM134C    | 1263.46729 | 0.29151826 | 0.03489426 | 0.18534275 |
| SMG5       | 1447.87688 | -0.2844759 | 0.03490681 | 0.18534275 |
| VPS26B     | 1057.72619 | -0.2320113 | 0.03488452 | 0.18534275 |
| AKIP1      | 180.704204 | 0.38167609 | 0.03498198 | 0.18544966 |
| BRWD1-IT2  | 17.733317  | -0.6846713 | 0.03498219 | 0.18544966 |
| GPA33      | 2.08475576 | 0.95116835 | 0.03500244 | 0.18544966 |
| IGFL2      | 5.41940341 | -1.0758932 | 0.0349762  | 0.18544966 |
| SCNN1A     | 291.786032 | -0.996062  | 0.03500034 | 0.18544966 |
| SYNE3      | 144.437534 | 0.67822363 | 0.03498329 | 0.18544966 |
| UNC5CL     | 18.185967  | 0.63772298 | 0.03498209 | 0.18544966 |
| EIF4EBP1   | 158.941122 | -0.5889765 | 0.03501802 | 0.18547636 |
| ADM        | 467.234036 | 0.985295   | 0.03505145 | 0.18548587 |
| CCR1       | 188.497248 | 0.75916809 | 0.03503652 | 0.18548587 |
| MST1P2     | 23.991054  | -0.87528   | 0.03504555 | 0.18548587 |
| CLEC2D     | 328.666787 | 0.50246729 | 0.03508439 | 0.18559672 |
| LOC1005070 | 18.096686  | 0.78275172 | 0.0350935  | 0.18559672 |
| LOC1019272 | 1.44561409 | 1.03115828 | 0.03511501 | 0.18564827 |
| ULK4P3     | 4.3400452  | -1.0397339 | 0.035133   | 0.18564827 |
| WDFY4      | 441.952034 | 0.65805359 | 0.03513491 | 0.18564827 |
| LOC1001343 | 3.61084512 | 1.00439794 | 0.03515887 | 0.18571906 |
| METTL20    | 58.985435  | 0.51185428 | 0.0352085  | 0.1859254  |
| ADAR       | 5694.80417 | -0.2339432 | 0.03531612 | 0.18604119 |
| AGPAT3     | 1577.5178  | -0.3754813 | 0.03541023 | 0.18604119 |
| AHCYL2     | 6250.16472 | 0.59189845 | 0.03534661 | 0.18604119 |
| FHOD1      | 603.5887   | -0.58773   | 0.03526197 | 0.18604119 |
| GFRA2      | 3.2630694  | -0.9678218 | 0.03526784 | 0.18604119 |
| KCNJ13     | 29.1411939 | -1.0802917 | 0.03529835 | 0.18604119 |
| LIPC       | 8.59055215 | 1.01880773 | 0.03540885 | 0.18604119 |
| LRRRC37A4P | 346.796044 | -0.547402  | 0.03538962 | 0.18604119 |
| OSGEP      | 224.700335 | 0.39677302 | 0.03536374 | 0.18604119 |
| PAPSS1     | 959.74067  | -0.4196963 | 0.03526764 | 0.18604119 |
| PLEKHO1    | 354.145246 | 0.47580691 | 0.03538307 | 0.18604119 |
| SLC26A11   | 304.971097 | -0.3997851 | 0.03528016 | 0.18604119 |
| SNORA18    | 21.3464624 | -0.5773429 | 0.03537528 | 0.18604119 |
| TBC1D2B    | 1682.05852 | 0.32960792 | 0.0353717  | 0.18604119 |
| UBE3C      | 1589.09352 | -0.2071443 | 0.03535104 | 0.18604119 |
| VEGFC      | 20.2826916 | 0.94943455 | 0.03535129 | 0.18604119 |

|            |            |            |            |            |
|------------|------------|------------|------------|------------|
| WIPI1      | 1501.30983 | -0.5031937 | 0.03530562 | 0.18604119 |
| HTR2C      | 3.8762911  | 1.07390724 | 0.03543391 | 0.18611003 |
| LOC1005061 | 20.5565693 | -0.6485823 | 0.03545925 | 0.18618755 |
| CD163L1    | 90.5191424 | -0.873995  | 0.0355166  | 0.18637737 |
| CDC42SE1   | 1209.99462 | 0.26529007 | 0.035512   | 0.18637737 |
| PIEZO2     | 3223.89496 | -0.9625185 | 0.0356561  | 0.18705364 |
| ZC3H8      | 93.1745975 | -0.3685947 | 0.03567549 | 0.18709956 |
| SNX5       | 737.132049 | 0.37630545 | 0.03571727 | 0.18726284 |
| CEP95      | 510.124907 | -0.3600305 | 0.03576129 | 0.18728757 |
| ETNK1      | 1516.12565 | 0.38752123 | 0.03576458 | 0.18728757 |
| GPC5       | 15.340395  | -1.0298745 | 0.03573994 | 0.18728757 |
| PEX3       | 204.821614 | 0.40142228 | 0.03576096 | 0.18728757 |
| ATP5G2     | 1498.02183 | -0.3019617 | 0.03580742 | 0.18734461 |
| BEND6      | 64.2795737 | 0.854102   | 0.03580346 | 0.18734461 |
| TCTN3      | 796.761873 | 0.34393875 | 0.03579486 | 0.18734461 |
| ZNF124     | 334.043142 | 0.52823232 | 0.03582109 | 0.18736038 |
| CRIM1      | 5558.84356 | 0.59887114 | 0.03585256 | 0.18746923 |
| LACE1      | 58.9520415 | 0.45626276 | 0.03590375 | 0.18760501 |
| MRPS25     | 1069.80726 | -0.4958018 | 0.03589287 | 0.18760501 |
| SRPR       | 2238.34882 | -0.2621241 | 0.03591052 | 0.18760501 |
| PJA2       | 3938.55036 | 0.41515933 | 0.03592133 | 0.18760573 |
| BEX1       | 40.8284228 | -1.0253153 | 0.03594589 | 0.18767829 |
| METRNL     | 924.340845 | -0.6694701 | 0.03597199 | 0.18775886 |
| SEL1L3     | 461.305493 | -0.6703042 | 0.03606345 | 0.18818036 |
| CDK19      | 442.211633 | 0.40365334 | 0.03619635 | 0.18865    |
| DTX4       | 717.563842 | -0.6960138 | 0.03617718 | 0.18865    |
| FLVCR1     | 210.389679 | -0.4289433 | 0.03617897 | 0.18865    |
| SHPRH      | 954.639107 | 0.32429424 | 0.03618962 | 0.18865    |
| TEX15      | 520.71065  | -1.0289284 | 0.0362207  | 0.18872099 |
| MRPL18     | 284.925036 | 0.3395863  | 0.03625829 | 0.18886094 |
| TNFRSF14   | 292.678056 | 0.52811084 | 0.03628548 | 0.1889466  |
| SLC2A14    | 11.9098947 | -0.9004853 | 0.03634252 | 0.18918758 |
| SPINK8     | 1.38016885 | -1.0238467 | 0.03646055 | 0.1897459  |
| PALD1      | 993.438053 | 0.61418123 | 0.03650101 | 0.18990026 |
| CD40       | 97.9579427 | 0.85570972 | 0.03652691 | 0.18994578 |
| ISLR2      | 26.1541354 | -0.9309332 | 0.03653136 | 0.18994578 |
| FMOD       | 4295.79147 | 0.46203758 | 0.03657498 | 0.1900041  |
| ITGB1BP1   | 387.026199 | -0.3695507 | 0.03655948 | 0.1900041  |
| RPS9       | 3736.68306 | 0.34586845 | 0.03657089 | 0.1900041  |
| CASP1      | 162.300759 | 0.44816274 | 0.0367028  | 0.19021871 |
| FYB        | 547.539411 | 0.66881356 | 0.03663676 | 0.19021871 |
| HAVCR2     | 342.653711 | 0.67575407 | 0.03668783 | 0.19021871 |
| LINC00858  | 2.62201988 | -0.9995042 | 0.03665299 | 0.19021871 |
| LPHN1      | 1147.6857  | -0.4912562 | 0.03670032 | 0.19021871 |
| PRDM1      | 170.978757 | 0.63388555 | 0.03669893 | 0.19021871 |
| SSBP2      | 934.240871 | 0.65419381 | 0.0366817  | 0.19021871 |
| TP53I11    | 5662.95749 | -0.8868852 | 0.0366775  | 0.19021871 |
| KDM7A      | 518.572888 | 0.35628467 | 0.03674498 | 0.19029081 |
| LOC1019291 | 3.57611737 | -1.0309781 | 0.03672835 | 0.19029081 |
| RPL36A     | 400.756731 | 0.42655701 | 0.03674917 | 0.19029081 |

|           |            |            |            |            |
|-----------|------------|------------|------------|------------|
| TMEM181   | 714.491917 | 0.41252985 | 0.03680335 | 0.19051526 |
| ROCK1     | 1861.64557 | 0.37234502 | 0.03682973 | 0.19059577 |
| LINC01061 | 88.4439088 | -0.594709  | 0.03686814 | 0.19068234 |
| PAK6      | 61.2862124 | -0.7173172 | 0.03686003 | 0.19068234 |
| ERCC2     | 332.822459 | -0.3924757 | 0.03689657 | 0.19071722 |
| ZFP69     | 50.8172771 | 0.42558282 | 0.03689515 | 0.19071722 |
| CLEC11A   | 185.206213 | 0.93737812 | 0.03691552 | 0.19075909 |
| GMPS      | 809.526626 | -0.3017212 | 0.03697839 | 0.19102786 |
| PSMB1     | 846.625229 | 0.35208183 | 0.03701873 | 0.1911801  |
| BTK       | 131.450085 | 0.71371677 | 0.037132   | 0.19123878 |
| BTNL9     | 907.867462 | -0.8134216 | 0.03713366 | 0.19123878 |
| CXCR2P1   | 2.51818085 | -1.0480211 | 0.03710621 | 0.19123878 |
| HERC6     | 186.173094 | 0.53319163 | 0.03714968 | 0.19123878 |
| KRCC1     | 321.932735 | 0.39121851 | 0.03707059 | 0.19123878 |
| LINC01237 | 6.36216893 | 0.92653321 | 0.03714719 | 0.19123878 |
| LOC339874 | 14.2684885 | 0.84332256 | 0.03710977 | 0.19123878 |
| RNF212    | 43.306654  | -1.0696572 | 0.03713409 | 0.19123878 |
| SIVA1     | 209.895123 | 0.362111   | 0.03712267 | 0.19123878 |
| SNX14     | 890.427165 | 0.40532332 | 0.03704379 | 0.19123878 |
| ZNF22     | 243.491106 | 0.47514452 | 0.03713442 | 0.19123878 |
| GFAP      | 596.65589  | -1.0109724 | 0.03717437 | 0.19130989 |
| C19orf57  | 13.9797064 | -0.8037207 | 0.03720539 | 0.19141352 |
| INPP5J    | 182.827158 | -0.7480139 | 0.03724318 | 0.19155193 |
| ZNF573    | 179.756017 | 0.38081161 | 0.03735213 | 0.1920561  |
| HIST1H3F  | 110.239916 | -0.8302768 | 0.03737853 | 0.19207954 |
| SRM       | 497.103201 | -0.4507003 | 0.03737114 | 0.19207954 |
| PIK3R5    | 322.3986   | 0.71146085 | 0.0373921  | 0.19209319 |
| ATG16L2   | 159.175521 | 0.54948493 | 0.03743812 | 0.19215082 |
| IER5      | 376.722586 | 0.52953455 | 0.03743261 | 0.19215082 |
| ITFG3     | 1106.0578  | -0.3834216 | 0.03744702 | 0.19215082 |
| SIRPG     | 3.80664972 | 1.04729959 | 0.03744177 | 0.19215082 |
| PLA2G5    | 1.95817395 | 1.06880519 | 0.03746105 | 0.19216676 |
| ACKR4     | 23.7134881 | -0.9897853 | 0.03747901 | 0.19220286 |
| C1QTNF7   | 30.349341  | 1.05469514 | 0.03751831 | 0.19234832 |
| ANXA9     | 88.6771802 | -0.7580708 | 0.0375694  | 0.19240781 |
| ARHGEF15  | 51.9787338 | 0.76188331 | 0.03756091 | 0.19240781 |
| FAM150B   | 6.08745422 | -1.0467131 | 0.03757248 | 0.19240781 |
| PTPRO     | 89.1636402 | 0.70936765 | 0.03757367 | 0.19240781 |
| HCFC1R1   | 583.945741 | -0.5355552 | 0.03759634 | 0.19246788 |
| FEM1C     | 748.831244 | 0.42619522 | 0.03761736 | 0.19251943 |
| CHRNE     | 18.3514471 | 0.90316351 | 0.03763541 | 0.19255579 |
| ZNF846    | 410.953147 | 0.47334424 | 0.03769629 | 0.19281123 |
| PLP2      | 621.771973 | -0.582347  | 0.03773032 | 0.1928731  |
| TMSB10    | 7790.92344 | -0.3952657 | 0.03772693 | 0.1928731  |
| AIM1L     | 2.02697742 | -1.0600831 | 0.03778653 | 0.19310434 |
| CLSTN3    | 729.185031 | -0.4840554 | 0.03783897 | 0.19326    |
| SERTAD2   | 355.601423 | 0.55142799 | 0.03783866 | 0.19326    |
| SS18L2    | 50.9534287 | 0.39340747 | 0.03787512 | 0.19338849 |
| PPP1R9B   | 1020.09716 | -0.25523   | 0.03791877 | 0.19352499 |
| YJEFN3    | 29.2529156 | -0.7356673 | 0.03792386 | 0.19352499 |

|            |            |            |            |            |
|------------|------------|------------|------------|------------|
| TTC9C      | 204.818086 | -0.2733101 | 0.03795935 | 0.19364993 |
| FDFT1      | 803.864426 | -0.4272115 | 0.03799103 | 0.19375535 |
| NMUR1      | 4.93244048 | 0.94330295 | 0.03805226 | 0.1940114  |
| RAD1       | 349.894418 | 0.30649101 | 0.03806939 | 0.19404249 |
| ITPR2      | 3466.37347 | 0.5452155  | 0.03808153 | 0.1940481  |
| TNK1       | 79.4288315 | -0.6580009 | 0.03810819 | 0.19412771 |
| LINC00599  | 1.55282855 | -1.0577873 | 0.03814221 | 0.19416884 |
| MRPS34     | 336.529499 | -0.3992467 | 0.03816041 | 0.19416884 |
| MSL2       | 874.089892 | -0.2133978 | 0.03815718 | 0.19416884 |
| RNF2       | 374.478447 | -0.2774843 | 0.03813977 | 0.19416884 |
| ARL14EP    | 290.188357 | 0.37644949 | 0.03821643 | 0.19439765 |
| COPS4      | 423.786684 | 0.2706866  | 0.03824397 | 0.19448146 |
| MIR612     | 2.45674369 | -0.9080476 | 0.03827489 | 0.19452623 |
| YBX3P1     | 5.35506924 | -0.8142088 | 0.03826718 | 0.19452623 |
| FBXO31     | 697.857603 | -0.3360166 | 0.03830031 | 0.1945744  |
| THOC1      | 320.554841 | 0.39239815 | 0.03830649 | 0.1945744  |
| IMPACT     | 590.06858  | 0.49194096 | 0.03834241 | 0.19470061 |
| SP140      | 28.8293111 | 0.70622314 | 0.03836329 | 0.19475043 |
| DCUN1D3    | 298.803865 | 0.57278271 | 0.03839786 | 0.19475731 |
| PIGW       | 132.346769 | -0.5054355 | 0.03839381 | 0.19475731 |
| TRAPPC2P1  | 49.5933534 | 0.44282468 | 0.0383965  | 0.19475731 |
| RNF133     | 19.1947795 | -0.8359396 | 0.03843268 | 0.19487774 |
| IER3IP1    | 321.978911 | 0.43551356 | 0.03848658 | 0.19503861 |
| SYNJ1      | 1035.02015 | -0.4114843 | 0.03848358 | 0.19503861 |
| CARNS1     | 13.8435122 | -1.0035415 | 0.03852773 | 0.1951347  |
| SPATS2     | 367.119111 | -0.3832695 | 0.03851907 | 0.1951347  |
| ANKRD32    | 221.90063  | 0.70377801 | 0.03855308 | 0.19515828 |
| ARID3B     | 83.4701112 | 0.4956576  | 0.03855458 | 0.19515828 |
| LBH        | 817.286238 | 0.67426455 | 0.0385707  | 0.19518374 |
| IPO5P1     | 357.097072 | 0.48987869 | 0.03865176 | 0.19553766 |
| MYH15      | 14.9963976 | 0.78931809 | 0.03866694 | 0.19555824 |
| ESD        | 771.429757 | 0.27718481 | 0.03872909 | 0.19581625 |
| FILIP1L    | 312.102809 | 0.69037911 | 0.03880387 | 0.19608159 |
| WDR81      | 913.633928 | 0.44946622 | 0.0387938  | 0.19608159 |
| ITPKC      | 464.644348 | 0.39796189 | 0.03886754 | 0.19634692 |
| IKZF1      | 268.075962 | 0.68619227 | 0.03894701 | 0.19657901 |
| PTOV1      | 1064.04471 | -0.2548773 | 0.03894595 | 0.19657901 |
| TPST1      | 194.569479 | 0.44862241 | 0.03894432 | 0.19657901 |
| FSCN1      | 1450.77759 | -0.3541503 | 0.03902696 | 0.19686958 |
| KIAA1045   | 10.3077974 | 0.90566796 | 0.03901671 | 0.19686958 |
| PLD4       | 180.17944  | 0.89529838 | 0.0391135  | 0.19724954 |
| PRDM6      | 934.255136 | 0.70291276 | 0.03914116 | 0.19729782 |
| ZNF75A     | 289.554624 | -0.314458  | 0.0391455  | 0.19729782 |
| HCK        | 241.198002 | 0.67995718 | 0.03917665 | 0.19734172 |
| SECTM1     | 47.9671826 | 0.71605141 | 0.03917512 | 0.19734172 |
| CENPI      | 40.7872867 | -0.7448694 | 0.03925037 | 0.19754336 |
| MAP7       | 163.304385 | 0.7283244  | 0.03924305 | 0.19754336 |
| PDLIM2     | 424.878626 | 0.61133338 | 0.0392445  | 0.19754336 |
| LOC1005071 | 13.0656524 | 0.82543001 | 0.03926428 | 0.19755684 |
| NIPSNAP1   | 511.285001 | -0.5467711 | 0.03929101 | 0.1976348  |

|            |            |            |            |            |
|------------|------------|------------|------------|------------|
| C16orf52   | 357.487707 | 0.28672478 | 0.0393548  | 0.19784251 |
| ZNF582     | 58.3818456 | 0.50919731 | 0.03934481 | 0.19784251 |
| B4GALNT1   | 50.5937149 | -0.9139429 | 0.03939568 | 0.19793777 |
| CPVL       | 356.54044  | 0.50924156 | 0.03943001 | 0.19793777 |
| GUSBP3     | 29.9899236 | 0.61464598 | 0.03939732 | 0.19793777 |
| PLAG1      | 37.2834674 | 0.82914771 | 0.03940803 | 0.19793777 |
| SMIM2-AS1  | 4.72221536 | 0.81403739 | 0.039429   | 0.19793777 |
| ENTPD1     | 788.365754 | 0.63712021 | 0.03949189 | 0.19819181 |
| CHD7       | 859.377125 | -0.5207748 | 0.03956934 | 0.19835415 |
| LOC1019278 | 10.8324413 | 0.82280997 | 0.03955701 | 0.19835415 |
| LRRC8E     | 62.9977379 | -0.7297815 | 0.03954781 | 0.19835415 |
| SUMF2      | 1021.69228 | 0.34354617 | 0.03955814 | 0.19835415 |
| PGS1       | 477.707496 | -0.3031228 | 0.03960566 | 0.19847966 |
| ZNF33BP1   | 29.6457532 | 0.57112056 | 0.03962364 | 0.19851321 |
| CTSV       | 141.051292 | -1.0205301 | 0.03969436 | 0.19881087 |
| MACROD2    | 174.46293  | 0.81374412 | 0.03973679 | 0.19896675 |
| SLC7A9     | 4.340495   | 0.76699562 | 0.03976851 | 0.19906891 |
| PCDHGB7    | 828.664311 | -0.6677716 | 0.03978847 | 0.19911213 |
| MAP2K5     | 331.813871 | -0.3649646 | 0.03982417 | 0.19923411 |
| CNGA1      | 3.59416362 | 1.04017236 | 0.0398564  | 0.199282   |
| LRIG1      | 1098.66431 | -0.5192601 | 0.03985531 | 0.199282   |
| ZNF791     | 482.939797 | 0.35026138 | 0.03988667 | 0.1993767  |
| NBEAL1     | 1290.33003 | 0.20768103 | 0.03994994 | 0.19963622 |
| NTRK2      | 4854.92701 | 0.92153875 | 0.04002171 | 0.19993805 |
| LRRC40     | 192.248117 | 0.36763715 | 0.04007432 | 0.20010685 |
| VWA5B2     | 3.02787087 | -1.0244629 | 0.04007825 | 0.20010685 |
| SPATC1L    | 61.8216254 | -0.9630099 | 0.0401054  | 0.20018558 |
| GPATCH2L   | 1431.17892 | 0.32911161 | 0.04011779 | 0.20019061 |
| CDC25C     | 10.7524333 | -0.9018626 | 0.04013855 | 0.20023741 |
| COL25A1    | 31.389379  | 0.86566817 | 0.04018926 | 0.20031852 |
| GAS2L1     | 189.505871 | -0.4316743 | 0.0401669  | 0.20031852 |
| IGSF1      | 37.4910466 | -1.0130506 | 0.04020036 | 0.20031852 |
| MCTP2      | 203.838357 | -0.8551086 | 0.04019408 | 0.20031852 |
| TMEM80     | 164.370572 | 0.5301325  | 0.04022003 | 0.20035974 |
| PHF1       | 43.7094103 | 0.45140741 | 0.04026673 | 0.20053559 |
| ENOX2      | 141.870457 | 0.35848448 | 0.04029953 | 0.20058539 |
| LINC00189  | 67.1711399 | -0.8634809 | 0.04028992 | 0.20058539 |
| HYOU1      | 2663.96954 | -0.5076867 | 0.04036031 | 0.20077427 |
| OSBPL7     | 294.598689 | -0.3213228 | 0.0403545  | 0.20077427 |
| CLGN       | 9.74773827 | -0.97356   | 0.04043858 | 0.20110678 |
| LINC01176  | 22.2705244 | 0.72249315 | 0.04047888 | 0.20121876 |
| METTL15    | 238.558946 | 0.33192088 | 0.04049542 | 0.20121876 |
| RIOK2      | 351.833665 | 0.33856949 | 0.04049067 | 0.20121876 |
| ZDHHC16    | 337.858745 | -0.3707761 | 0.04050701 | 0.20121952 |
| MAFF       | 198.67175  | 0.94222981 | 0.04053002 | 0.20127696 |
| STAG3L4    | 215.032187 | -0.3435816 | 0.04054331 | 0.20128617 |
| ST6GALNAC6 | 908.089249 | 0.41437248 | 0.04058517 | 0.20143713 |
| YWHAG      | 2649.87682 | -0.3276345 | 0.04063199 | 0.20161259 |
| SCARF2     | 469.177505 | -0.6313644 | 0.04068933 | 0.20184021 |
| ATP1B2     | 213.686419 | -0.7671026 | 0.04075684 | 0.20194727 |

|            |            |            |            |            |
|------------|------------|------------|------------|------------|
| C14orf39   | 66.2607985 | 0.92332212 | 0.04073672 | 0.20194727 |
| UBE2M      | 568.692666 | -0.4767132 | 0.04074742 | 0.20194727 |
| VAC14      | 490.723425 | -0.3166752 | 0.04074943 | 0.20194727 |
| OLFML1     | 1548.569   | 0.72077527 | 0.04078123 | 0.20201121 |
| RRP8       | 181.778485 | 0.30816205 | 0.04080935 | 0.20209361 |
| ANXA2P2    | 84.9055383 | -0.6285371 | 0.04090243 | 0.20210465 |
| ARHGAP25   | 131.16387  | 0.62811384 | 0.0409035  | 0.20210465 |
| GZMK       | 14.6854968 | 0.92189802 | 0.04085517 | 0.20210465 |
| KCNIP2-AS1 | 1.34402505 | 1.01314214 | 0.04084699 | 0.20210465 |
| MED30      | 84.2780918 | 0.46202261 | 0.04086984 | 0.20210465 |
| MEPCE      | 719.146861 | -0.3136554 | 0.04084888 | 0.20210465 |
| NPIPA5     | 64.8092228 | -0.6445554 | 0.04086586 | 0.20210465 |
| SNHG1      | 384.596973 | -0.4159636 | 0.04090291 | 0.20210465 |
| CBX5       | 6673.13845 | -0.2688486 | 0.04097912 | 0.20238334 |
| CEP44      | 409.724237 | 0.311872   | 0.04102894 | 0.20238334 |
| IGSF11     | 103.806915 | -0.9194818 | 0.04102406 | 0.20238334 |
| MCCC2      | 830.790789 | -0.2670939 | 0.04101354 | 0.20238334 |
| NFIB       | 2664.01937 | -0.5463586 | 0.04099494 | 0.20238334 |
| PGLS       | 419.364404 | -0.2572831 | 0.04102049 | 0.20238334 |
| GNB4       | 1340.92935 | 0.62480642 | 0.04104207 | 0.20239136 |
| SHARPIN    | 445.56554  | -0.3142374 | 0.04105789 | 0.20241262 |
| DIXDC1     | 1849.4715  | -0.5914427 | 0.04113976 | 0.20271727 |
| SLC19A3    | 2.71893955 | -1.0000729 | 0.04114273 | 0.20271727 |
| C6orf147   | 13.8344512 | -1.0039196 | 0.04118012 | 0.20283998 |
| CPA2       | 1.76519866 | -1.0415679 | 0.0411907  | 0.20283998 |
| RRAGB      | 371.223174 | 0.22865023 | 0.04121968 | 0.20292589 |
| SLC35D2    | 289.893847 | 0.26303198 | 0.04125626 | 0.20301517 |
| TNFSF4     | 49.9102876 | 0.77561469 | 0.0412609  | 0.20301517 |
| LOC1005055 | 66.3744876 | 0.58237889 | 0.04127977 | 0.2030512  |
| C10orf128  | 27.1587372 | 0.69857167 | 0.04131336 | 0.20314094 |
| IRAK1BP1   | 145.702279 | 0.65000922 | 0.04132111 | 0.20314094 |
| SPIN1      | 2629.13408 | -0.2163335 | 0.04133799 | 0.20316715 |
| C2CD2L     | 286.882481 | -0.3918371 | 0.04136041 | 0.20322056 |
| ZDHHHC13   | 151.142284 | -0.5124243 | 0.04138483 | 0.20328379 |
| NEURL1     | 9.49779151 | -0.884286  | 0.04142052 | 0.20329465 |
| PIGM       | 311.679059 | -0.3825376 | 0.04140083 | 0.20329465 |
| RNU12      | 61.1105406 | 0.4717217  | 0.04142172 | 0.20329465 |
| LOC1019295 | 3.43618835 | 0.94106362 | 0.04147629 | 0.20350571 |
| GAP43      | 387.233541 | -1.0023808 | 0.04154209 | 0.20373755 |
| PCDHB17    | 42.7006587 | -0.8695782 | 0.04154671 | 0.20373755 |
| ENPP2      | 437.1916   | 0.80549955 | 0.04155954 | 0.20374367 |
| SPAG9      | 6670.43394 | 0.32424099 | 0.04158114 | 0.20374593 |
| TAS2R5     | 67.8346287 | 0.56184709 | 0.04158317 | 0.20374593 |
| PXK        | 257.618784 | 0.47434785 | 0.04163931 | 0.20396419 |
| HLA-DRB1   | 1622.18773 | 0.9562411  | 0.04165444 | 0.20398149 |
| COQ10A     | 101.097408 | -0.4877027 | 0.04172046 | 0.20419114 |
| RPS8       | 6291.98911 | 0.43631857 | 0.04171402 | 0.20419114 |
| SNIP1      | 217.509164 | 0.4650503  | 0.04178565 | 0.20445331 |
| FAM58A     | 119.48502  | -0.3122001 | 0.04189396 | 0.20492624 |
| CAMKV      | 1.91865453 | -1.0422069 | 0.04195192 | 0.2051445  |



|            |            |            |            |            |
|------------|------------|------------|------------|------------|
| CST6       | 1.56131206 | 1.04288881 | 0.04197018 | 0.2051445  |
| RPL8       | 7907.55269 | -0.4688765 | 0.04197357 | 0.2051445  |
| FOXO3      | 2463.10359 | 0.65852541 | 0.04199737 | 0.20514681 |
| SNHG3      | 244.410045 | 0.40709368 | 0.04199188 | 0.20514681 |
| RHBDL1     | 23.4233454 | -0.6518578 | 0.04202516 | 0.20516862 |
| SS18L1     | 307.355    | -0.4197417 | 0.04201959 | 0.20516862 |
| C3orf70    | 237.197103 | 0.72376125 | 0.04207925 | 0.20531875 |
| PDCD6IPP2  | 33.600459  | 0.86187816 | 0.04207802 | 0.20531875 |
| LAIR1      | 544.05771  | 0.64573464 | 0.04210025 | 0.2053642  |
| FAM214A    | 1044.65201 | -0.2808872 | 0.04215568 | 0.20557758 |
| WDR93      | 3.8038987  | -0.9305324 | 0.04225398 | 0.20594278 |
| ZNF8       | 343.191305 | -0.2679799 | 0.04224626 | 0.20594278 |
| DOK1       | 245.815661 | 0.41301397 | 0.04228109 | 0.20601782 |
| KDM5A      | 2756.31688 | 0.36722296 | 0.04231398 | 0.206121   |
| BCKDHA     | 432.187531 | -0.3512416 | 0.04234712 | 0.20622533 |
| ALK        | 7.84815225 | -0.8491448 | 0.04237585 | 0.2063081  |
| TTC29      | 14.2544956 | -1.0429386 | 0.04239934 | 0.20632656 |
| ZNF292     | 1858.71895 | 0.35315931 | 0.0424031  | 0.20632656 |
| NAE1       | 460.049594 | 0.28573232 | 0.04244405 | 0.20641163 |
| RPS6KA2    | 1447.6195  | -0.664211  | 0.04243671 | 0.20641163 |
| NME6       | 92.6751731 | 0.35708107 | 0.04246225 | 0.20644305 |
| CRYGS      | 13.7783077 | 0.64810003 | 0.0424931  | 0.20647888 |
| DNAJC27-AS | 54.5688105 | 0.68770842 | 0.04248382 | 0.20647888 |
| OLFM2      | 158.255725 | 0.82617685 | 0.04252311 | 0.20649918 |
| RPL23AP82  | 48.6288699 | 0.64435581 | 0.04254423 | 0.20649918 |
| ZNF414     | 94.8556422 | -0.5248648 | 0.04254266 | 0.20649918 |
| ZNF587B    | 470.60024  | -0.3094507 | 0.04253275 | 0.20649918 |
| IRF2BP1    | 320.537326 | -0.2931055 | 0.04257198 | 0.20657685 |
| C11orf68   | 379.283272 | -0.2902473 | 0.04264097 | 0.20685459 |
| PDGFB      | 324.25684  | 0.54894491 | 0.04272317 | 0.20719617 |
| LINC00482  | 18.1721238 | -0.967833  | 0.04274219 | 0.2072313  |
| FBRS       | 618.303686 | -0.2764516 | 0.04279126 | 0.207296   |
| PELI2      | 134.152302 | 0.67930866 | 0.04279734 | 0.207296   |
| RGPD4      | 19.0637381 | 0.62770938 | 0.04281526 | 0.207296   |
| TM4SF1     | 693.847339 | 0.6757152  | 0.04281588 | 0.207296   |
| TRDMT1     | 277.450399 | 0.4013929  | 0.04277946 | 0.207296   |
| ZNF222     | 54.7680363 | 0.37285129 | 0.04282625 | 0.207296   |
| VTI1A      | 537.307934 | 0.33909544 | 0.04283827 | 0.20729714 |
| BCL10      | 191.515632 | 0.41580355 | 0.04291929 | 0.20761552 |
| CYP2B7P    | 5.21775599 | 0.95281129 | 0.04295102 | 0.20761552 |
| LOC1005061 | 1.77060596 | -1.0319549 | 0.04295426 | 0.20761552 |
| PCDH19     | 545.381495 | -0.9712846 | 0.04293063 | 0.20761552 |
| XRCC6      | 1794.1729  | 0.34222994 | 0.04296308 | 0.20761552 |
| ANXA7      | 1215.37512 | 0.30667641 | 0.04301878 | 0.20781073 |
| YRDC       | 67.4619215 | 0.46988362 | 0.0430271  | 0.20781073 |
| POF1B      | 9.32205757 | -1.0177637 | 0.04304566 | 0.20784329 |
| COX6B1     | 1145.27526 | -0.3692732 | 0.04307881 | 0.20794627 |
| NCF4       | 121.669426 | 0.61670529 | 0.04309441 | 0.20796452 |
| KLHDC2     | 618.646094 | 0.49046854 | 0.04315784 | 0.20821351 |
| DDX28      | 103.015097 | -0.3375738 | 0.04320852 | 0.20823971 |

|            |            |            |            |            |
|------------|------------|------------|------------|------------|
| MBD2       | 665.847739 | 0.51780114 | 0.04319661 | 0.20823971 |
| PCIF1      | 621.498508 | -0.3522432 | 0.04317835 | 0.20823971 |
| RAVER1     | 563.945441 | -0.3451771 | 0.04321063 | 0.20823971 |
| MAP3K7     | 1012.58601 | 0.34235278 | 0.04325808 | 0.20829719 |
| MATR3      | 5508.29544 | 0.2033866  | 0.04323612 | 0.20829719 |
| VPS4B      | 769.83924  | 0.39569924 | 0.04325379 | 0.20829719 |
| HLA-DOA    | 31.9452772 | 0.88927866 | 0.0432997  | 0.20844052 |
| HSF1       | 617.51626  | -0.3031775 | 0.04333377 | 0.20854747 |
| ZNF205-AS1 | 5.39184198 | 0.7851226  | 0.0433661  | 0.20864598 |
| C7orf55    | 47.0653205 | 0.4655182  | 0.04338434 | 0.20867668 |
| HHATL      | 1.9639756  | -0.9931431 | 0.04339839 | 0.20868717 |
| LILRB5     | 50.2269842 | -1.0183371 | 0.04341539 | 0.20871185 |
| ZNF271     | 574.6136   | 0.34172032 | 0.04343396 | 0.2087441  |
| MTHFD1     | 694.888271 | -0.3621843 | 0.04349132 | 0.20879157 |
| PRIMPOL    | 204.343615 | 0.32835354 | 0.04347132 | 0.20879157 |
| PRRT2      | 180.069009 | 0.77517286 | 0.04347975 | 0.20879157 |
| SON        | 12477.3485 | -0.2604097 | 0.0434891  | 0.20879157 |
| POLE       | 1266.15931 | -0.4085184 | 0.04356689 | 0.20909729 |
| RBM27      | 1025.68673 | 0.20854862 | 0.04359178 | 0.20915969 |
| EXD2       | 398.594819 | 0.44345658 | 0.04363915 | 0.20921601 |
| LIMCH1     | 1267.57674 | 0.59295778 | 0.0436392  | 0.20921601 |
| MAP7D3     | 286.47035  | 0.74819064 | 0.04362398 | 0.20921601 |
| CHMP4C     | 63.8139986 | -1.0066276 | 0.04371303 | 0.20951288 |
| ITGA1      | 2205.04749 | 0.64475276 | 0.04375743 | 0.20966851 |
| ZSCAN26    | 300.803467 | 0.41084098 | 0.04381255 | 0.20987547 |
| CLDN23     | 4.42171329 | 0.82323064 | 0.04393858 | 0.21042041 |
| GDNF-AS1   | 1.40266401 | 1.01111075 | 0.04396118 | 0.21042041 |
| ISOC2      | 519.119862 | -0.3468724 | 0.04397416 | 0.21042041 |
| ZNF622     | 292.616657 | 0.38128575 | 0.04397192 | 0.21042041 |
| ADAMTSL3   | 5447.03969 | 0.78846594 | 0.04416914 | 0.21051511 |
| C16orf80   | 215.212012 | -0.3064481 | 0.04409171 | 0.21051511 |
| CAPN11     | 6.64521919 | 0.8665089  | 0.04410608 | 0.21051511 |
| EVPL       | 4.83653382 | -0.9467417 | 0.04419402 | 0.21051511 |
| GALK2      | 364.236227 | 0.25661731 | 0.04409841 | 0.21051511 |
| GPR137     | 309.852347 | -0.362165  | 0.04412314 | 0.21051511 |
| HSBP1L1    | 93.5748549 | -0.5426809 | 0.04413983 | 0.21051511 |
| ISLR       | 11026.8832 | -0.8432679 | 0.04410099 | 0.21051511 |
| LINC01140  | 4.54774345 | 0.74996337 | 0.04410463 | 0.21051511 |
| MMP28      | 191.346119 | 0.9214464  | 0.0441915  | 0.21051511 |
| NECAP2     | 504.457123 | 0.35087401 | 0.04403756 | 0.21051511 |
| NXN        | 726.420093 | -0.6853449 | 0.04419857 | 0.21051511 |
| SHB        | 702.610497 | -0.5887186 | 0.04409909 | 0.21051511 |
| SLC5A9     | 4.33198825 | 0.89745897 | 0.0441774  | 0.21051511 |
| SLC8A3     | 8.46459038 | 0.95549211 | 0.04420937 | 0.21051511 |
| UCKL1      | 398.43627  | -0.4079554 | 0.04414745 | 0.21051511 |
| ZCCHC4     | 140.785402 | 0.34790691 | 0.04409777 | 0.21051511 |
| ZFP36L2    | 3511.65583 | -0.4263456 | 0.04406199 | 0.21051511 |
| LACTB      | 235.425954 | 0.45801418 | 0.04425843 | 0.21063469 |
| PCGF6      | 92.7532585 | 0.40135475 | 0.04425564 | 0.21063469 |
| GMPPA      | 269.818778 | -0.3619197 | 0.04427888 | 0.21067502 |

|            |            |            |            |            |
|------------|------------|------------|------------|------------|
| DDX3X      | 5586.63776 | 0.27846904 | 0.0443307  | 0.21080751 |
| LOC1022884 | 28.0537633 | -0.4464259 | 0.04431982 | 0.21080751 |
| MAPKAPK5-A | 139.468152 | 0.29306992 | 0.04440658 | 0.21111129 |
| SCRN3      | 402.651671 | -0.2367615 | 0.04448727 | 0.21143775 |
| ZNF878     | 3.80421563 | -0.8641188 | 0.04452292 | 0.21155004 |
| BCS1L      | 229.18372  | -0.3163686 | 0.04460536 | 0.21159878 |
| DMC1       | 7.81423093 | 0.82957003 | 0.04457524 | 0.21159878 |
| KLK11      | 3.4260298  | -0.9420673 | 0.04459718 | 0.21159878 |
| LHX2       | 2.95436843 | -1.0326227 | 0.04454612 | 0.21159878 |
| MORC4      | 463.900728 | 0.43857299 | 0.04459525 | 0.21159878 |
| RBMS3      | 777.861994 | 0.87146955 | 0.04457922 | 0.21159878 |
| RFX1       | 203.999605 | -0.3420383 | 0.0448212  | 0.21256536 |
| VPS37B     | 307.46994  | -0.243501  | 0.04489548 | 0.21286022 |
| DFNB31     | 178.989428 | -0.6071747 | 0.04495322 | 0.21295446 |
| MS4A6A     | 797.819861 | 0.59865427 | 0.04495658 | 0.21295446 |
| PIGF       | 153.03589  | 0.39190408 | 0.04496228 | 0.21295446 |
| RAB6A      | 2210.79411 | -0.2169076 | 0.04496378 | 0.21295446 |
| NEK1       | 661.113544 | 0.31541937 | 0.0450349  | 0.21317648 |
| STXBP5-AS1 | 8.59625568 | 0.82712789 | 0.04503149 | 0.21317648 |
| UBE2O      | 733.135037 | -0.2750967 | 0.04505869 | 0.21323171 |
| EMILIN1    | 932.739322 | 0.74700912 | 0.04519789 | 0.2134823  |
| KPNB1      | 3605.04605 | -0.2419704 | 0.0451669  | 0.2134823  |
| LINC00941  | 4.60473977 | -1.0052366 | 0.04519428 | 0.2134823  |
| LINC01279  | 393.612357 | 0.76172199 | 0.04514068 | 0.2134823  |
| PDHX       | 610.689454 | -0.2862234 | 0.04517285 | 0.2134823  |
| PML        | 1018.16551 | -0.3380339 | 0.04520873 | 0.2134823  |
| TRPM6      | 15.439791  | -0.95054   | 0.04512499 | 0.2134823  |
| ZNRF2P1    | 36.1002016 | -0.6011609 | 0.04515547 | 0.2134823  |
| DPY19L2P3  | 5.23384281 | 0.73528092 | 0.04523875 | 0.2135667  |
| IFT88      | 280.896526 | 0.44174581 | 0.04528123 | 0.2136576  |
| PRLR       | 44.8075172 | 0.81384962 | 0.0452881  | 0.2136576  |
| TUBB3      | 125.840134 | -0.9400211 | 0.04529444 | 0.2136576  |
| ATP6AP1    | 1700.68728 | -0.2621404 | 0.04535325 | 0.21370579 |
| GOLGA6L9   | 18.8393414 | -0.707982  | 0.04532069 | 0.21370579 |
| PYGL       | 691.800866 | 0.4745546  | 0.04534195 | 0.21370579 |
| ZNF784     | 70.7511118 | -0.5350495 | 0.04535229 | 0.21370579 |
| FSCN2      | 26.111017  | -0.7951798 | 0.04537721 | 0.21376144 |
| ARNT2      | 6606.36038 | -0.6353784 | 0.0454451  | 0.21399453 |
| PER3       | 1039.8286  | 0.56876497 | 0.04546319 | 0.21399453 |
| SNTG1      | 3.40655971 | -1.0257086 | 0.0454526  | 0.21399453 |
| HLTF       | 1444.1811  | -0.318955  | 0.04549794 | 0.21402003 |
| ITGA3      | 754.942283 | -0.6784944 | 0.04550181 | 0.21402003 |
| OSGIN1     | 21.2311302 | 0.83587263 | 0.04551728 | 0.21402003 |
| PRKCE      | 535.322573 | -0.4105464 | 0.04550639 | 0.21402003 |
| LOC1005075 | 5.57855028 | 0.73475395 | 0.04554435 | 0.21403289 |
| SNORA55    | 1.80055144 | 0.92080974 | 0.0455373  | 0.21403289 |
| DLG1       | 1418.6169  | -0.2107388 | 0.04557869 | 0.2140799  |
| LUZP2      | 31.5954281 | 1.02778328 | 0.0455685  | 0.2140799  |
| PRKD2      | 501.085234 | -0.3608381 | 0.04566177 | 0.21439387 |
| TRIP4      | 285.541522 | -0.2947488 | 0.04566992 | 0.21439387 |

|            |            |            |            |            |
|------------|------------|------------|------------|------------|
| KCTD20     | 1626.78781 | 0.34176898 | 0.04570901 | 0.21452015 |
| FAF1       | 545.827185 | 0.25128399 | 0.04573233 | 0.21457224 |
| SPNS1      | 372.204708 | -0.321728  | 0.04574451 | 0.21457224 |
| ARFGAP2    | 870.988287 | 0.28147645 | 0.04579295 | 0.21469311 |
| GPR183     | 158.068776 | 0.78908363 | 0.04579469 | 0.21469311 |
| HELLS      | 200.736013 | -0.6255577 | 0.04585236 | 0.21490623 |
| DDX5       | 9955.5466  | -0.2852117 | 0.04587844 | 0.21491392 |
| ZNF397     | 366.826978 | 0.36977787 | 0.04587321 | 0.21491392 |
| LINC00173  | 31.9871132 | -0.857067  | 0.04595208 | 0.2151443  |
| RPL28      | 4346.07911 | -0.4790981 | 0.04594424 | 0.2151443  |
| CENPW      | 25.0119182 | 0.71874682 | 0.04597999 | 0.21521767 |
| EXOSC4     | 113.878132 | -0.3717818 | 0.04600839 | 0.21523605 |
| LOC1019269 | 2.94679815 | 0.89971608 | 0.04599634 | 0.21523605 |
| BRSK1      | 165.144273 | -0.8074301 | 0.04603028 | 0.21528123 |
| MEA1       | 358.406587 | -0.3472748 | 0.04607662 | 0.21544065 |
| TNFRSF4    | 6.2607815  | 0.85181293 | 0.046102   | 0.21550202 |
| IGBP1      | 583.714652 | 0.32788079 | 0.04613159 | 0.21558305 |
| GOLGA1     | 591.458322 | -0.2394096 | 0.04617456 | 0.21566929 |
| TTC23L     | 8.23212658 | 0.74729652 | 0.04616613 | 0.21566929 |
| ADNP       | 2921.36577 | -0.3167354 | 0.04619332 | 0.21567211 |
| ASCC3      | 1697.04326 | 0.38938361 | 0.04623139 | 0.21567211 |
| FUCA1      | 425.359176 | 0.45605254 | 0.04622268 | 0.21567211 |
| GRIN2C     | 8.19786901 | -0.7793268 | 0.04623585 | 0.21567211 |
| NPAT       | 739.568078 | -0.1844768 | 0.04623647 | 0.21567211 |
| IP6K3      | 15.8518673 | -1.0217187 | 0.04626553 | 0.21571445 |
| LOC1019290 | 1.90028426 | -0.9928936 | 0.04627007 | 0.21571445 |
| FTO-IT1    | 30.5931919 | 0.59775614 | 0.04631816 | 0.21583341 |
| GPR37      | 12.638798  | -1.0219202 | 0.04632013 | 0.21583341 |
| NCR3LG1    | 845.481615 | -0.7935202 | 0.04633975 | 0.21586763 |
| CSF3R      | 328.933752 | 0.71072675 | 0.04639227 | 0.21590422 |
| IKZF2      | 483.87179  | 0.43058946 | 0.04638909 | 0.21590422 |
| SELL       | 68.0373487 | 0.66555565 | 0.04638915 | 0.21590422 |
| TMBIM4     | 906.587839 | 0.26490852 | 0.0463967  | 0.21590422 |
| PDSS2      | 272.022296 | 0.41004434 | 0.04641555 | 0.21593483 |
| HDAC1      | 425.837296 | 0.43461069 | 0.04649275 | 0.21617942 |
| LOC145783  | 141.879239 | -0.3930438 | 0.04652958 | 0.21617942 |
| LOC150776  | 417.295308 | -0.4847739 | 0.04651262 | 0.21617942 |
| NDUFS4     | 432.393813 | 0.327406   | 0.04651892 | 0.21617942 |
| SLC6A8     | 886.459679 | 0.608376   | 0.04650606 | 0.21617942 |
| ARHGAP5-AS | 31.7635397 | -0.6668815 | 0.04657828 | 0.21629145 |
| JUN        | 3377.2183  | 0.57397501 | 0.04657491 | 0.21629145 |
| EIF3I      | 864.261886 | 0.34717708 | 0.04661809 | 0.21639476 |
| FGD5P1     | 51.2515192 | -0.9000457 | 0.04662514 | 0.21639476 |
| LOC613037  | 27.6474392 | 0.63144798 | 0.04664044 | 0.21640871 |
| ATXN7L2    | 63.0591328 | 0.49419028 | 0.04671011 | 0.2166748  |
| C7orf63    | 69.4042251 | 0.49853293 | 0.04677224 | 0.21667712 |
| CIRBP-AS1  | 3.24086463 | -0.9963427 | 0.04678452 | 0.21667712 |
| ITGB2-AS1  | 55.447562  | 0.88170657 | 0.04676783 | 0.21667712 |
| SMYD3      | 103.401361 | -0.325786  | 0.04676453 | 0.21667712 |
| WDR4       | 192.995292 | -0.4179098 | 0.04678109 | 0.21667712 |

|             |            |            |            |            |
|-------------|------------|------------|------------|------------|
| ZNF536      | 277.223014 | -0.7974539 | 0.04677311 | 0.21667712 |
| ASAP3       | 997.592836 | 0.54079254 | 0.04684256 | 0.21682189 |
| GPSM3       | 3.14511034 | -0.9617427 | 0.04684403 | 0.21682189 |
| PRDM8       | 7.12214672 | -0.9286355 | 0.04685276 | 0.21682189 |
| NFE2L3      | 73.1762727 | 0.69361853 | 0.04689738 | 0.21697129 |
| MTM1        | 229.697679 | 0.3481853  | 0.04697681 | 0.21728163 |
| SEPT7       | 2805.7521  | 0.3600778  | 0.04701283 | 0.21739106 |
| HHIPL2      | 5.97905307 | -0.959706  | 0.04706797 | 0.21758886 |
| ATL1        | 414.577594 | 0.6002632  | 0.04709602 | 0.21766134 |
| FRMD6-AS1   | 15.2515923 | 0.67525628 | 0.04713544 | 0.2177863  |
| GPRC5A      | 331.170851 | -0.93567   | 0.04722019 | 0.21806361 |
| RAB11FIP1   | 1417.41966 | -0.565045  | 0.04722026 | 0.21806361 |
| NME1        | 298.069925 | -0.451558  | 0.04724767 | 0.21813292 |
| NBAS        | 1796.7949  | 0.21042788 | 0.04733221 | 0.21844522 |
| ZSCAN12     | 373.206612 | -0.3373372 | 0.04734015 | 0.21844522 |
| LOC283440   | 2.00503247 | 0.98494154 | 0.04735591 | 0.21846065 |
| CXorf21     | 35.8754237 | 0.83243777 | 0.04739015 | 0.218504   |
| MBD1        | 743.948741 | 0.33000856 | 0.0473789  | 0.218504   |
| CHTF18      | 166.409093 | -0.4504592 | 0.04743414 | 0.21853497 |
| CNBP        | 3084.20191 | 0.16511098 | 0.04741414 | 0.21853497 |
| GRM5        | 1.73741911 | -1.0124736 | 0.04742654 | 0.21853497 |
| CIR1        | 422.491165 | -0.1610436 | 0.04746232 | 0.21860753 |
| GALK1       | 149.7359   | -0.472466  | 0.0475043  | 0.21874364 |
| LYSMD3      | 538.825892 | 0.32809521 | 0.04752637 | 0.21878797 |
| LOC1005062  | 3.95578964 | 0.82833583 | 0.04755198 | 0.2188486  |
| CPD         | 5665.75007 | -0.4528361 | 0.04764911 | 0.21891593 |
| JMJD1C-AS1  | 4.31097766 | -0.9458422 | 0.04761461 | 0.21891593 |
| MRPS28      | 125.348704 | 0.40325053 | 0.04764471 | 0.21891593 |
| PCBP2       | 6036.42724 | -0.4458549 | 0.04765373 | 0.21891593 |
| RAB40A      | 7.71247537 | 0.69074169 | 0.04759325 | 0.21891593 |
| SH2D1A      | 6.94914472 | 0.95079718 | 0.04761893 | 0.21891593 |
| TMEM17      | 39.9272047 | 0.47607458 | 0.04758095 | 0.21891593 |
| ALDH1L1-AS1 | 1.83065457 | 0.99731283 | 0.04767256 | 0.21894524 |
| UFL1        | 917.56176  | 0.38274036 | 0.04773609 | 0.21917978 |
| LIPA        | 1201.48735 | 0.41393458 | 0.04777788 | 0.21931444 |
| ZNF490      | 428.69535  | 0.37253456 | 0.04781191 | 0.2194134  |
| SETBP1      | 3703.37648 | 0.51479741 | 0.04784088 | 0.21948905 |
| FOS         | 5726.33899 | 0.77888962 | 0.04786561 | 0.21953335 |
| MAPKAP1     | 1082.90253 | -0.1836547 | 0.04787549 | 0.21953335 |
| RAD18       | 284.097956 | -0.3730212 | 0.04789004 | 0.21954282 |
| ARF1        | 4190.72588 | -0.2910688 | 0.04798816 | 0.2197895  |
| GPSM2       | 168.259662 | -0.7626666 | 0.04800633 | 0.2197895  |
| KLF7        | 1096.84387 | 0.36031196 | 0.04797823 | 0.2197895  |
| LOC729080   | 1.72827439 | -0.9592287 | 0.04799568 | 0.2197895  |
| SUN2        | 1007.96732 | 0.32687062 | 0.04797659 | 0.2197895  |
| CCKBR       | 9.67967203 | -0.9182671 | 0.04802678 | 0.21980849 |
| IFNGR2      | 762.589131 | 0.30455368 | 0.0480588  | 0.21980849 |
| LY86        | 94.289478  | 0.704098   | 0.04805307 | 0.21980849 |
| RAB3IL1     | 1735.79462 | -0.3911935 | 0.04806046 | 0.21980849 |
| EPHA6       | 6.73039943 | -0.9937098 | 0.04809386 | 0.2199041  |

|            |            |            |            |            |
|------------|------------|------------|------------|------------|
| CCDC102B   | 83.9158255 | 0.51025947 | 0.0481114  | 0.21992709 |
| EPCAM      | 3.33462608 | -0.9643816 | 0.04813969 | 0.21994211 |
| STX7       | 1748.95473 | 0.35569387 | 0.04813612 | 0.21994211 |
| NCF2       | 270.283234 | 0.64128756 | 0.04815735 | 0.21996565 |
| MIR143HG   | 36.2687276 | 0.83335697 | 0.04817615 | 0.21999442 |
| IFNAR2     | 395.422094 | -0.4324244 | 0.04825293 | 0.22028783 |
| TMEM240    | 12.1843445 | 0.73494358 | 0.04827766 | 0.22034356 |
| ULBP1      | 3.99654147 | 0.98987992 | 0.04831527 | 0.22045802 |
| BHMT2      | 518.324573 | 0.88581764 | 0.04840261 | 0.22063545 |
| CD37       | 128.021885 | 0.68381859 | 0.04839246 | 0.22063545 |
| DCX        | 11.6763571 | -0.9408048 | 0.04840433 | 0.22063545 |
| GTF3C3     | 571.329414 | -0.2155252 | 0.04838523 | 0.22063545 |
| PEX6       | 379.816227 | 0.48720553 | 0.04845375 | 0.2207463  |
| TMEM214    | 1005.40394 | -0.3532856 | 0.04845132 | 0.2207463  |
| GOLGA2     | 1478.14733 | -0.2128786 | 0.04866241 | 0.2216395  |
| NDUFB3     | 343.656523 | -0.3216803 | 0.04870149 | 0.22176011 |
| C1orf95    | 12.6619062 | 0.77157532 | 0.04872637 | 0.22181597 |
| ACTR3C     | 24.317666  | -0.5574402 | 0.04879771 | 0.22196837 |
| DOK5       | 144.191196 | 0.92467302 | 0.04879734 | 0.22196837 |
| PPP1R15A   | 948.27234  | 0.59429631 | 0.0487896  | 0.22196837 |
| NOC3L      | 399.707372 | 0.36904138 | 0.04883893 | 0.22209843 |
| DCDC5      | 16.1480911 | -0.90228   | 0.0488961  | 0.22223846 |
| FOXP3      | 3.15058091 | -0.9182525 | 0.04892205 | 0.22223846 |
| PKP2       | 3114.22944 | 0.75176682 | 0.04891793 | 0.22223846 |
| PTPN9      | 1207.77378 | -0.429032  | 0.04893289 | 0.22223846 |
| SNTB1      | 113.104982 | 0.71476926 | 0.04893276 | 0.22223846 |
| ABI3BP     | 3918.98917 | 0.86310392 | 0.04900288 | 0.22246234 |
| CABIN1     | 1050.49439 | 0.27577317 | 0.04900748 | 0.22246234 |
| PABPC1L    | 293.960745 | -0.613497  | 0.04903231 | 0.22251761 |
| RARS2      | 424.984279 | 0.34767012 | 0.04910318 | 0.22266744 |
| STT3A      | 2062.76328 | -0.258614  | 0.04910012 | 0.22266744 |
| VAX2       | 11.1148561 | -1.002219  | 0.0491033  | 0.22266744 |
| IGDCC4     | 183.363909 | -0.8332516 | 0.04916216 | 0.22281949 |
| PIP5KL1    | 8.41753081 | -0.8147513 | 0.04915439 | 0.22281949 |
| MYO19      | 575.665715 | -0.46368   | 0.04921588 | 0.22300551 |
| SLC22A3    | 799.255822 | -0.7480609 | 0.04928026 | 0.2232397  |
| INTS4      | 356.797903 | -0.26577   | 0.04930172 | 0.22327939 |
| CBX7       | 410.597246 | 0.45014873 | 0.04937666 | 0.22348935 |
| LOC1001290 | 1335.36594 | -0.439945  | 0.0494224  | 0.22348935 |
| PRRC2B     | 6647.81993 | -0.2518607 | 0.04937239 | 0.22348935 |
| PWWP2A     | 469.696296 | 0.33478518 | 0.049423   | 0.22348935 |
| RDH16      | 3.79180445 | 0.88665047 | 0.04943701 | 0.22348935 |
| RFX2       | 153.027609 | 0.78879003 | 0.04943309 | 0.22348935 |
| SURF1      | 298.154738 | -0.2599644 | 0.04942142 | 0.22348935 |
| ARHGAP30   | 355.532427 | 0.62526562 | 0.04951148 | 0.22376846 |
| HRASLS5    | 42.8539959 | 1.00834537 | 0.04953818 | 0.22380008 |
| MIAT       | 617.528335 | -0.7840879 | 0.04954392 | 0.22380008 |
| TIMM8B     | 294.136273 | -0.3806866 | 0.04962156 | 0.22409327 |
| DHX58      | 246.870147 | 0.39770879 | 0.04967382 | 0.22427167 |
| DTYMK      | 121.657804 | -0.4389273 | 0.04970322 | 0.22434685 |

|          |            |            |            |            |
|----------|------------|------------|------------|------------|
| ASF1A    | 259.011308 | 0.41992363 | 0.04974818 | 0.22437706 |
| LBX1     | 1.59052284 | -0.9154071 | 0.04972273 | 0.22437706 |
| TNFRSF8  | 6.04640602 | 0.83516951 | 0.04974449 | 0.22437706 |
| RNPEPL1  | 537.124924 | -0.3615973 | 0.04976736 | 0.22440602 |
| ATP6V1B1 | 16.2489035 | -0.971931  | 0.04980181 | 0.22442742 |
| FLII     | 2123.67544 | -0.2826066 | 0.0497983  | 0.22442742 |
| KCNMB3   | 137.737048 | -0.5266599 | 0.04982314 | 0.22442742 |
| MOB3A    | 486.099836 | 0.2729282  | 0.0498131  | 0.22442742 |
| CLDN11   | 5740.14042 | -0.9116287 | 0.04986335 | 0.22455102 |
| KCNK10   | 15.9116983 | 0.98701631 | 0.04995534 | 0.22490773 |
