# Supplementary material for: Transcriptome signatures associated with meningioma progression
Source: Springer Nature journal article supplement (doi:10.1186/s40478-019-0690-x), 2019-04-30
Supplement: MOESM6 [file 25666702]

**Supplementary Table 5: Differentially expressed genes between GR II S. and GR II DN meningiomas**

| Gene       | baseMean | log2FoldChar | lfcSE    | pvalue   | padj     |
|------------|----------|--------------|----------|----------|----------|
| LRP2       | 2.16E+02 | 3.05E+00     | 5.13E-01 | 2.71E-09 | 4.32E-05 |
| GLDC       | 2.61E+02 | -2.11E+00    | 3.67E-01 | 9.36E-09 | 5.36E-05 |
| SLC6A12    | 5.19E+02 | 2.89E+00     | 5.05E-01 | 1.01E-08 | 5.36E-05 |
| TMEM100    | 1.59E+03 | -2.35E+00    | 4.50E-01 | 1.70E-07 | 6.76E-04 |
| TMEM132B   | 6.26E+01 | 2.31E+00     | 4.48E-01 | 2.50E-07 | 7.96E-04 |
| SLC26A7    | 7.45E+02 | -2.63E+00    | 5.33E-01 | 7.95E-07 | 2.11E-03 |
| LOC1019293 | 2.19E+01 | -2.63E+00    | 5.42E-01 | 1.16E-06 | 2.41E-03 |
| RABL3      | 1.92E+02 | 8.51E-01     | 1.76E-01 | 1.30E-06 | 2.41E-03 |
| RET        | 1.72E+01 | 2.62E+00     | 5.42E-01 | 1.36E-06 | 2.41E-03 |
| HECTD4     | 4.72E+03 | 8.05E-01     | 1.69E-01 | 1.90E-06 | 2.52E-03 |
| LINC00478  | 3.16E+02 | 2.11E+00     | 4.43E-01 | 1.78E-06 | 2.52E-03 |
| PIAS1      | 1.49E+03 | 8.08E-01     | 1.69E-01 | 1.83E-06 | 2.52E-03 |
| SH3GL1P2   | 1.41E+01 | -2.55E+00    | 5.42E-01 | 2.64E-06 | 3.24E-03 |
| LOC1027235 | 2.15E+01 | 2.52E+00     | 5.44E-01 | 3.48E-06 | 3.70E-03 |
| NNAT       | 3.01E+02 | 2.53E+00     | 5.45E-01 | 3.41E-06 | 3.70E-03 |
| AOX1       | 2.07E+03 | -1.97E+00    | 4.26E-01 | 3.88E-06 | 3.87E-03 |
| HAAO       | 1.08E+02 | -2.05E+00    | 4.48E-01 | 4.91E-06 | 4.61E-03 |
| C5orf30    | 3.66E+02 | 1.81E+00     | 4.01E-01 | 6.41E-06 | 5.31E-03 |
| CILP       | 1.15E+02 | 2.39E+00     | 5.30E-01 | 6.50E-06 | 5.31E-03 |
| INF2       | 1.31E+03 | 1.20E+00     | 2.65E-01 | 6.66E-06 | 5.31E-03 |
| CX3CR1     | 6.78E+02 | -2.12E+00    | 4.76E-01 | 8.21E-06 | 6.05E-03 |
| GABRE      | 1.43E+03 | 1.94E+00     | 4.36E-01 | 8.64E-06 | 6.05E-03 |
| SLC6A13    | 1.13E+03 | 2.33E+00     | 5.24E-01 | 8.72E-06 | 6.05E-03 |
| LHFPL2     | 4.94E+03 | 1.31E+00     | 2.98E-01 | 1.14E-05 | 7.27E-03 |
| SUSD5      | 7.85E+01 | 2.30E+00     | 5.25E-01 | 1.14E-05 | 7.27E-03 |
| SNAPC1     | 7.85E+01 | 1.16E+00     | 2.68E-01 | 1.42E-05 | 8.71E-03 |
| HEY1       | 2.34E+02 | 1.16E+00     | 2.68E-01 | 1.48E-05 | 8.72E-03 |
| CA9        | 4.63E+01 | 2.27E+00     | 5.33E-01 | 2.09E-05 | 1.19E-02 |
| IFI27      | 2.93E+02 | 1.71E+00     | 4.04E-01 | 2.25E-05 | 1.24E-02 |
| LOC653602  | 1.32E+01 | 2.02E+00     | 4.80E-01 | 2.47E-05 | 1.31E-02 |
| ADAM19     | 3.33E+02 | 1.58E+00     | 3.76E-01 | 2.78E-05 | 1.43E-02 |
| ITSN1      | 1.58E+03 | 9.20E-01     | 2.20E-01 | 2.94E-05 | 1.46E-02 |
| ILDR2      | 6.88E+01 | 2.14E+00     | 5.14E-01 | 3.24E-05 | 1.52E-02 |
| THSD4      | 2.68E+04 | -1.31E+00    | 3.15E-01 | 3.20E-05 | 1.52E-02 |
| MAB21L1    | 3.99E+01 | -2.15E+00    | 5.19E-01 | 3.58E-05 | 1.63E-02 |
| SYNJ2BP    | 9.61E+02 | 8.05E-01     | 1.95E-01 | 3.79E-05 | 1.68E-02 |
| DLGAP2     | 3.92E+01 | -2.21E+00    | 5.39E-01 | 3.95E-05 | 1.70E-02 |
| TRIM22     | 2.65E+03 | 7.13E-01     | 1.74E-01 | 4.04E-05 | 1.70E-02 |
| PDLIM2     | 2.54E+02 | -1.01E+00    | 2.49E-01 | 4.65E-05 | 1.90E-02 |
| ENPEP      | 9.02E+02 | 1.75E+00     | 4.30E-01 | 4.88E-05 | 1.95E-02 |
| BAIAP2     | 3.91E+02 | 1.05E+00     | 2.62E-01 | 5.85E-05 | 2.28E-02 |
| ATP1A2     | 5.59E+03 | 2.17E+00     | 5.43E-01 | 6.31E-05 | 2.39E-02 |
| FGF7       | 3.36E+01 | -1.98E+00    | 4.99E-01 | 7.45E-05 | 2.77E-02 |
| CECR1      | 2.38E+02 | -1.55E+00    | 3.94E-01 | 8.50E-05 | 2.85E-02 |
| DLEU7-AS1  | 1.66E+01 | -2.09E+00    | 5.32E-01 | 8.57E-05 | 2.85E-02 |
| ISG15      | 8.98E+01 | 1.24E+00     | 3.16E-01 | 8.00E-05 | 2.85E-02 |
| PGM1       | 5.54E+02 | -1.33E+00    | 3.38E-01 | 8.34E-05 | 2.85E-02 |
| RPRM       | 8.22E+01 | -2.07E+00    | 5.26E-01 | 8.20E-05 | 2.85E-02 |
| ANKRD20A1  | 8.16E+01 | -2.13E+00    | 5.43E-01 | 8.91E-05 | 2.90E-02 |
| TLR1       | 2.77E+02 | -1.16E+00    | 3.00E-01 | 1.05E-04 | 3.37E-02 |

|           |          |           |          |          |          |
|-----------|----------|-----------|----------|----------|----------|
| CNRIP1    | 2.80E+02 | -1.09E+00 | 2.83E-01 | 1.24E-04 | 3.82E-02 |
| ZNF189    | 9.52E+02 | 1.05E+00  | 2.74E-01 | 1.24E-04 | 3.82E-02 |
| C21orf15  | 1.45E+02 | -2.08E+00 | 5.45E-01 | 1.33E-04 | 3.99E-02 |
| COL18A1   | 2.22E+03 | 1.82E+00  | 4.79E-01 | 1.44E-04 | 4.24E-02 |
| C2orf40   | 4.95E+02 | -1.71E+00 | 4.54E-01 | 1.62E-04 | 4.50E-02 |
| MGC16025  | 1.04E+02 | -1.29E+00 | 3.44E-01 | 1.72E-04 | 4.50E-02 |
| REC8      | 1.09E+02 | 1.81E+00  | 4.80E-01 | 1.65E-04 | 4.50E-02 |
| RHOV      | 4.63E+00 | 2.03E+00  | 5.41E-01 | 1.70E-04 | 4.50E-02 |
| SLC16A9   | 8.01E+02 | -1.54E+00 | 4.07E-01 | 1.59E-04 | 4.50E-02 |
| TMEM144   | 5.47E+01 | -1.35E+00 | 3.59E-01 | 1.64E-04 | 4.50E-02 |
| TMEM171   | 4.98E+00 | 1.94E+00  | 5.16E-01 | 1.70E-04 | 4.50E-02 |
| LAD1      | 5.68E+00 | 2.04E+00  | 5.43E-01 | 1.77E-04 | 4.55E-02 |
| ASPM      | 1.76E+02 | 1.33E+00  | 3.57E-01 | 1.87E-04 | 4.59E-02 |
| DHRS12    | 1.14E+02 | 8.99E-01  | 2.40E-01 | 1.82E-04 | 4.59E-02 |
| GAL3ST4   | 2.54E+02 | -9.95E-01 | 2.66E-01 | 1.87E-04 | 4.59E-02 |
| EBF2      | 1.72E+02 | 2.03E+00  | 5.44E-01 | 1.92E-04 | 4.64E-02 |
| PLXNC1    | 5.31E+03 | 1.64E+00  | 4.43E-01 | 2.09E-04 | 4.84E-02 |
| SLC9A9    | 2.97E+02 | -1.07E+00 | 2.90E-01 | 2.08E-04 | 4.84E-02 |
| TRAF5     | 1.86E+03 | 1.54E+00  | 4.15E-01 | 2.09E-04 | 4.84E-02 |
| GALNT18   | 1.62E+02 | 1.45E+00  | 3.92E-01 | 2.16E-04 | 4.86E-02 |
| PDLIM3    | 2.27E+01 | 1.95E+00  | 5.26E-01 | 2.16E-04 | 4.86E-02 |
| SORBS2    | 1.27E+02 | 1.70E+00  | 4.60E-01 | 2.25E-04 | 4.98E-02 |
| NALCN     | 1.89E+03 | 6.87E-01  | 1.87E-01 | 2.34E-04 | 5.11E-02 |
| ITPRIPL1  | 3.45E+01 | -1.56E+00 | 4.27E-01 | 2.44E-04 | 5.19E-02 |
| LINC00869 | 5.52E+01 | -1.15E+00 | 3.13E-01 | 2.42E-04 | 5.19E-02 |
| C16orf86  | 1.74E+01 | -1.70E+00 | 4.66E-01 | 2.64E-04 | 5.54E-02 |
| ADM       | 2.67E+02 | 1.64E+00  | 4.51E-01 | 2.73E-04 | 5.65E-02 |
| H19       | 1.52E+04 | -1.98E+00 | 5.45E-01 | 2.86E-04 | 5.71E-02 |
| LYNX1     | 6.87E+02 | -1.53E+00 | 4.21E-01 | 2.81E-04 | 5.71E-02 |
| OR52N4    | 1.12E+01 | 1.75E+00  | 4.84E-01 | 2.86E-04 | 5.71E-02 |
| LINC00886 | 7.71E+01 | -1.63E+00 | 4.50E-01 | 2.92E-04 | 5.75E-02 |
| KLRG2     | 7.80E+01 | 1.96E+00  | 5.42E-01 | 2.99E-04 | 5.82E-02 |
| DZANK1    | 3.96E+01 | 1.38E+00  | 3.82E-01 | 3.18E-04 | 5.84E-02 |
| FAM46C    | 1.18E+02 | 1.59E+00  | 4.43E-01 | 3.18E-04 | 5.84E-02 |
| PAPLN     | 1.94E+03 | 1.80E+00  | 4.99E-01 | 3.18E-04 | 5.84E-02 |
| RANBP3L   | 3.55E+02 | 1.86E+00  | 5.14E-01 | 3.05E-04 | 5.84E-02 |
| TCHH      | 1.33E+01 | 1.92E+00  | 5.33E-01 | 3.11E-04 | 5.84E-02 |
| CBLL1     | 6.20E+02 | 9.85E-01  | 2.75E-01 | 3.42E-04 | 6.13E-02 |
| SYPL2     | 3.54E+01 | -1.50E+00 | 4.18E-01 | 3.42E-04 | 6.13E-02 |
| IMPDH1    | 3.90E+02 | 1.23E+00  | 3.46E-01 | 3.59E-04 | 6.23E-02 |
| ITGA1     | 1.61E+03 | 1.33E+00  | 3.74E-01 | 3.70E-04 | 6.23E-02 |
| MAP1LC3B  | 1.28E+03 | -5.25E-01 | 1.47E-01 | 3.58E-04 | 6.23E-02 |
| PLA2G6    | 2.68E+02 | -1.00E+00 | 2.82E-01 | 3.64E-04 | 6.23E-02 |
| RCSD1     | 8.51E+02 | -1.20E+00 | 3.38E-01 | 3.69E-04 | 6.23E-02 |
| ZMYND8    | 1.82E+03 | 9.31E-01  | 2.62E-01 | 3.71E-04 | 6.23E-02 |
| EFCAB11   | 5.38E+01 | 1.26E+00  | 3.54E-01 | 3.85E-04 | 6.31E-02 |
| EXPH5     | 1.31E+02 | -1.69E+00 | 4.77E-01 | 3.88E-04 | 6.31E-02 |
| GINS1     | 7.42E+01 | 1.15E+00  | 3.25E-01 | 3.80E-04 | 6.31E-02 |
| OR5P2     | 2.82E+00 | 1.92E+00  | 5.42E-01 | 3.98E-04 | 6.35E-02 |
| PLA2G7    | 5.81E+01 | -1.90E+00 | 5.38E-01 | 3.97E-04 | 6.35E-02 |
| NUAK2     | 1.13E+02 | 1.24E+00  | 3.51E-01 | 4.11E-04 | 6.43E-02 |
| SAV1      | 5.06E+02 | 1.05E+00  | 2.97E-01 | 4.15E-04 | 6.43E-02 |
| SRPRB     | 7.37E+02 | -9.90E-01 | 2.80E-01 | 4.09E-04 | 6.43E-02 |

|            |          |           |          |          |          |
|------------|----------|-----------|----------|----------|----------|
| CCDC102A   | 1.52E+02 | -1.12E+00 | 3.20E-01 | 4.41E-04 | 6.64E-02 |
| KIF20B     | 2.19E+02 | 8.96E-01  | 2.55E-01 | 4.39E-04 | 6.64E-02 |
| SYNE2      | 4.41E+03 | 1.38E+00  | 3.92E-01 | 4.40E-04 | 6.64E-02 |
| CALM1      | 3.03E+03 | 9.36E-01  | 2.67E-01 | 4.54E-04 | 6.70E-02 |
| MARVELD3   | 8.11E+01 | 1.91E+00  | 5.45E-01 | 4.50E-04 | 6.70E-02 |
| POLR1D     | 4.33E+02 | 5.64E-01  | 1.61E-01 | 4.66E-04 | 6.82E-02 |
| LRP8       | 1.52E+02 | 1.62E+00  | 4.63E-01 | 4.72E-04 | 6.84E-02 |
| NANOS1     | 4.20E+01 | 1.62E+00  | 4.63E-01 | 4.82E-04 | 6.93E-02 |
| AKR1B10    | 7.02E+00 | 1.90E+00  | 5.45E-01 | 5.01E-04 | 7.04E-02 |
| COBLL1     | 6.85E+02 | -1.46E+00 | 4.20E-01 | 5.16E-04 | 7.04E-02 |
| GPR135     | 3.21E+01 | 1.12E+00  | 3.21E-01 | 5.09E-04 | 7.04E-02 |
| RASSF3     | 4.75E+02 | 1.24E+00  | 3.55E-01 | 4.95E-04 | 7.04E-02 |
| SFRP5      | 6.76E+00 | 1.89E+00  | 5.45E-01 | 5.13E-04 | 7.04E-02 |
| SLC4A7     | 6.58E+02 | -1.05E+00 | 3.01E-01 | 5.05E-04 | 7.04E-02 |
| MOB3B      | 9.28E+01 | 1.69E+00  | 4.86E-01 | 5.21E-04 | 7.05E-02 |
| UBE2QL1    | 7.39E+01 | 1.69E+00  | 4.89E-01 | 5.30E-04 | 7.10E-02 |
| CLMP       | 6.78E+02 | -1.26E+00 | 3.65E-01 | 5.36E-04 | 7.13E-02 |
| ANKRD46    | 2.04E+02 | -7.40E-01 | 2.14E-01 | 5.57E-04 | 7.26E-02 |
| CHRNA4     | 1.72E+02 | 1.85E+00  | 5.37E-01 | 5.53E-04 | 7.26E-02 |
| COMMD7     | 2.82E+02 | 6.86E-01  | 1.99E-01 | 5.68E-04 | 7.26E-02 |
| DYNC1H1    | 9.80E+03 | 5.38E-01  | 1.56E-01 | 5.62E-04 | 7.26E-02 |
| RALGPS2    | 2.51E+02 | 1.41E+00  | 4.09E-01 | 5.69E-04 | 7.26E-02 |
| IFIT3      | 3.22E+02 | 8.96E-01  | 2.60E-01 | 5.79E-04 | 7.33E-02 |
| SYCE1      | 4.07E+01 | 1.86E+00  | 5.41E-01 | 5.88E-04 | 7.38E-02 |
| ENC1       | 2.69E+03 | 1.65E+00  | 4.80E-01 | 6.03E-04 | 7.46E-02 |
| FAM49A     | 1.82E+02 | 1.70E+00  | 4.96E-01 | 6.00E-04 | 7.46E-02 |
| ABLIM2     | 4.15E+01 | 1.53E+00  | 4.46E-01 | 6.12E-04 | 7.51E-02 |
| HLCS       | 6.41E+02 | 1.10E+00  | 3.22E-01 | 6.20E-04 | 7.54E-02 |
| HCAR1      | 1.46E+02 | 1.61E+00  | 4.72E-01 | 6.29E-04 | 7.60E-02 |
| PNMA1      | 6.90E+02 | 9.98E-01  | 2.93E-01 | 6.58E-04 | 7.89E-02 |
| OXER1      | 3.33E+01 | -1.69E+00 | 4.97E-01 | 6.68E-04 | 7.95E-02 |
| AJUBA      | 6.15E+02 | 9.98E-01  | 2.94E-01 | 6.97E-04 | 8.24E-02 |
| CD28       | 3.46E+01 | 1.84E+00  | 5.45E-01 | 7.08E-04 | 8.30E-02 |
| FKBP3      | 3.36E+02 | 9.74E-01  | 2.88E-01 | 7.18E-04 | 8.36E-02 |
| PCP4L1     | 1.83E+01 | 1.83E+00  | 5.42E-01 | 7.27E-04 | 8.41E-02 |
| FAM150B    | 1.07E+01 | 1.83E+00  | 5.45E-01 | 7.71E-04 | 8.81E-02 |
| PRTFDC1    | 1.18E+02 | -1.07E+00 | 3.19E-01 | 7.73E-04 | 8.81E-02 |
| CRYZL1     | 2.28E+02 | 5.83E-01  | 1.74E-01 | 7.85E-04 | 8.88E-02 |
| FAM129A    | 2.88E+03 | 1.72E+00  | 5.12E-01 | 7.92E-04 | 8.89E-02 |
| HSPB2      | 1.66E+02 | -8.24E-01 | 2.46E-01 | 8.00E-04 | 8.93E-02 |
| JAG2       | 2.35E+02 | 1.35E+00  | 4.03E-01 | 8.09E-04 | 8.96E-02 |
| ELFN1      | 2.41E+02 | -1.71E+00 | 5.11E-01 | 8.16E-04 | 8.98E-02 |
| TBX5       | 1.28E+01 | 1.72E+00  | 5.14E-01 | 8.22E-04 | 8.98E-02 |
| CCDC85C    | 3.60E+02 | 1.19E+00  | 3.57E-01 | 8.42E-04 | 9.14E-02 |
| ARHGEF39   | 4.50E+01 | 1.43E+00  | 4.29E-01 | 8.48E-04 | 9.14E-02 |
| TEX15      | 5.09E+02 | -1.73E+00 | 5.20E-01 | 8.66E-04 | 9.27E-02 |
| CPPED1     | 5.31E+02 | 1.45E+00  | 4.37E-01 | 9.05E-04 | 9.50E-02 |
| FOXC2      | 1.66E+03 | -9.15E-01 | 2.75E-01 | 8.96E-04 | 9.50E-02 |
| STPG2      | 1.13E+01 | -1.42E+00 | 4.29E-01 | 9.05E-04 | 9.50E-02 |
| FLJ36777   | 3.21E+00 | -1.80E+00 | 5.44E-01 | 9.28E-04 | 9.61E-02 |
| RCOR2      | 4.53E+00 | 1.71E+00  | 5.15E-01 | 9.26E-04 | 9.61E-02 |
| LOC1019272 | 1.26E+01 | -1.78E+00 | 5.39E-01 | 9.46E-04 | 9.73E-02 |
| FOXM1      | 1.02E+02 | 8.37E-01  | 2.54E-01 | 9.61E-04 | 9.78E-02 |

|          |          |           |          |          |          |
|----------|----------|-----------|----------|----------|----------|
| NMRK1    | 7.31E+01 | -9.20E-01 | 2.79E-01 | 9.63E-04 | 9.78E-02 |
| ADAM20   | 6.21E+01 | 1.22E+00  | 3.69E-01 | 9.94E-04 | 9.97E-02 |
| PPARGC1A | 1.22E+03 | -1.62E+00 | 4.93E-01 | 9.90E-04 | 9.97E-02 |
| IL20RA   | 1.28E+01 | -1.64E+00 | 4.98E-01 | 1.02E-03 | 1.01E-01 |
| PCCA     | 1.03E+03 | 9.96E-01  | 3.03E-01 | 1.02E-03 | 1.02E-01 |
| EIF5     | 1.83E+03 | 7.08E-01  | 2.16E-01 | 1.04E-03 | 1.02E-01 |
| SH3D21   | 1.13E+02 | 1.51E+00  | 4.59E-01 | 1.04E-03 | 1.02E-01 |
| CADM3    | 3.25E+01 | -1.70E+00 | 5.18E-01 | 1.05E-03 | 1.02E-01 |
| COL4A4   | 3.47E+02 | 1.78E+00  | 5.44E-01 | 1.08E-03 | 1.03E-01 |
| DTNA     | 1.01E+02 | -1.16E+00 | 3.55E-01 | 1.08E-03 | 1.03E-01 |
| EDA      | 3.37E+02 | 1.35E+00  | 4.13E-01 | 1.07E-03 | 1.03E-01 |
| BTBD11   | 4.20E+02 | 1.77E+00  | 5.41E-01 | 1.09E-03 | 1.04E-01 |
| SULF1    | 5.57E+03 | -1.69E+00 | 5.18E-01 | 1.10E-03 | 1.04E-01 |
| DDX26B   | 3.54E+02 | 1.48E+00  | 4.53E-01 | 1.13E-03 | 1.06E-01 |
| SLC24A4  | 1.15E+01 | 1.39E+00  | 4.25E-01 | 1.13E-03 | 1.06E-01 |
| HS6ST1   | 5.66E+02 | 1.05E+00  | 3.22E-01 | 1.15E-03 | 1.07E-01 |
| BEND6    | 4.30E+01 | -1.50E+00 | 4.61E-01 | 1.17E-03 | 1.08E-01 |
| CSNK2A3  | 1.26E+01 | 1.63E+00  | 5.03E-01 | 1.19E-03 | 1.08E-01 |
| FAM222B  | 4.96E+02 | 6.75E-01  | 2.09E-01 | 1.24E-03 | 1.08E-01 |
| FMO1     | 4.24E+02 | -1.64E+00 | 5.08E-01 | 1.23E-03 | 1.08E-01 |
| HSPBAP1  | 7.40E+01 | -9.54E-01 | 2.95E-01 | 1.22E-03 | 1.08E-01 |
| MME      | 1.19E+01 | 1.61E+00  | 4.96E-01 | 1.19E-03 | 1.08E-01 |
| NSG1     | 8.17E+01 | 1.71E+00  | 5.30E-01 | 1.23E-03 | 1.08E-01 |
| RRP1B    | 6.79E+02 | 6.67E-01  | 2.06E-01 | 1.24E-03 | 1.08E-01 |
| SMOC1    | 2.75E+03 | 1.61E+00  | 4.99E-01 | 1.24E-03 | 1.08E-01 |
| SSTR2    | 2.96E+03 | -1.43E+00 | 4.43E-01 | 1.23E-03 | 1.08E-01 |
| ZNF738   | 2.19E+02 | 1.04E+00  | 3.21E-01 | 1.20E-03 | 1.08E-01 |
| COCH     | 1.02E+02 | 1.75E+00  | 5.43E-01 | 1.26E-03 | 1.09E-01 |
| CPED1    | 3.81E+02 | -1.60E+00 | 4.97E-01 | 1.25E-03 | 1.09E-01 |
| IREB2    | 1.50E+03 | 3.94E-01  | 1.23E-01 | 1.33E-03 | 1.12E-01 |
| PCBP3    | 5.53E+01 | 1.59E+00  | 4.95E-01 | 1.31E-03 | 1.12E-01 |
| ZNF718   | 1.92E+02 | 7.96E-01  | 2.48E-01 | 1.32E-03 | 1.12E-01 |
| CYP4F3   | 3.39E+01 | 1.74E+00  | 5.44E-01 | 1.35E-03 | 1.14E-01 |
| VEZT     | 1.41E+03 | 6.54E-01  | 2.04E-01 | 1.36E-03 | 1.14E-01 |
| ARG2     | 8.84E+01 | 1.67E+00  | 5.22E-01 | 1.40E-03 | 1.15E-01 |
| MTUS2    | 3.71E+01 | 1.72E+00  | 5.38E-01 | 1.41E-03 | 1.15E-01 |
| OLFM4    | 6.36E+01 | 1.57E+00  | 4.93E-01 | 1.41E-03 | 1.15E-01 |
| PRMT2    | 1.71E+03 | 5.83E-01  | 1.83E-01 | 1.41E-03 | 1.15E-01 |
| SOD1     | 1.39E+03 | 5.41E-01  | 1.69E-01 | 1.40E-03 | 1.15E-01 |
| SOX6     | 6.23E+01 | -1.73E+00 | 5.42E-01 | 1.44E-03 | 1.17E-01 |
| CKMT1A   | 1.09E+01 | -1.73E+00 | 5.44E-01 | 1.48E-03 | 1.19E-01 |
| FBXO34   | 2.57E+02 | 9.00E-01  | 2.83E-01 | 1.48E-03 | 1.19E-01 |
| MAL2     | 4.74E+02 | -1.69E+00 | 5.33E-01 | 1.49E-03 | 1.19E-01 |
| NHS      | 6.19E+02 | 1.06E+00  | 3.35E-01 | 1.49E-03 | 1.19E-01 |
| PGBD5    | 2.65E+01 | 1.28E+00  | 4.04E-01 | 1.50E-03 | 1.19E-01 |
| PDXK     | 4.35E+03 | 9.03E-01  | 2.85E-01 | 1.51E-03 | 1.19E-01 |
| STOX1    | 4.45E+01 | 1.63E+00  | 5.13E-01 | 1.54E-03 | 1.21E-01 |
| TREX1    | 1.16E+02 | -7.40E-01 | 2.34E-01 | 1.59E-03 | 1.25E-01 |
| FBP1     | 4.06E+01 | -1.35E+00 | 4.28E-01 | 1.60E-03 | 1.25E-01 |
| CARD11   | 1.69E+02 | -1.16E+00 | 3.68E-01 | 1.64E-03 | 1.26E-01 |
| CDH4     | 1.40E+02 | 1.71E+00  | 5.43E-01 | 1.64E-03 | 1.26E-01 |
| COL4A3   | 2.26E+02 | 1.71E+00  | 5.43E-01 | 1.65E-03 | 1.26E-01 |
| FHL3     | 2.16E+02 | 1.30E+00  | 4.15E-01 | 1.66E-03 | 1.26E-01 |

|           |          |           |          |          |          |
|-----------|----------|-----------|----------|----------|----------|
| TLR6      | 1.52E+02 | -1.13E+00 | 3.57E-01 | 1.63E-03 | 1.26E-01 |
| ALDH2     | 4.30E+03 | -1.04E+00 | 3.30E-01 | 1.68E-03 | 1.27E-01 |
| C12orf65  | 1.41E+02 | 6.50E-01  | 2.07E-01 | 1.71E-03 | 1.27E-01 |
| KCNJ2     | 6.49E+02 | -1.58E+00 | 5.02E-01 | 1.72E-03 | 1.27E-01 |
| KLF6      | 2.24E+03 | 1.09E+00  | 3.47E-01 | 1.71E-03 | 1.27E-01 |
| MIR4697HG | 2.29E+02 | 1.23E+00  | 3.92E-01 | 1.71E-03 | 1.27E-01 |
| RNF144A   | 2.88E+02 | 1.43E+00  | 4.56E-01 | 1.72E-03 | 1.27E-01 |
| AKR1C3    | 2.98E+02 | 1.35E+00  | 4.32E-01 | 1.73E-03 | 1.27E-01 |
| KNSTRN    | 9.17E+01 | 7.23E-01  | 2.31E-01 | 1.79E-03 | 1.31E-01 |
| APCDD1    | 1.43E+03 | -1.55E+00 | 4.96E-01 | 1.82E-03 | 1.32E-01 |
| EHF       | 3.03E+02 | 1.46E+00  | 4.68E-01 | 1.83E-03 | 1.32E-01 |
| SCFD1     | 5.33E+02 | 7.86E-01  | 2.52E-01 | 1.81E-03 | 1.32E-01 |
| ATP1B1    | 2.01E+03 | -1.17E+00 | 3.76E-01 | 1.87E-03 | 1.33E-01 |
| CYP3A5    | 5.33E+02 | -1.32E+00 | 4.23E-01 | 1.86E-03 | 1.33E-01 |
| EPSTI1    | 7.93E+01 | 1.06E+00  | 3.39E-01 | 1.87E-03 | 1.33E-01 |
| PELO      | 3.92E+02 | 8.45E-01  | 2.72E-01 | 1.90E-03 | 1.34E-01 |
| SLC2A1    | 6.28E+02 | 1.30E+00  | 4.20E-01 | 1.90E-03 | 1.34E-01 |
| MFAP5     | 6.77E+02 | -1.63E+00 | 5.26E-01 | 1.93E-03 | 1.35E-01 |
| SERPINB10 | 1.09E+01 | -1.69E+00 | 5.45E-01 | 1.94E-03 | 1.36E-01 |
| AMOTL1    | 3.23E+03 | 1.16E+00  | 3.73E-01 | 1.97E-03 | 1.37E-01 |
| ZFAND1    | 3.20E+02 | -6.73E-01 | 2.18E-01 | 1.97E-03 | 1.37E-01 |
| CIAPIN1   | 3.35E+02 | -8.69E-01 | 2.81E-01 | 2.00E-03 | 1.38E-01 |
| RHOQ      | 1.37E+03 | -8.03E-01 | 2.60E-01 | 1.99E-03 | 1.38E-01 |
| MOV10L1   | 6.84E+00 | 1.64E+00  | 5.32E-01 | 2.02E-03 | 1.38E-01 |
| FANCM     | 1.86E+02 | 9.65E-01  | 3.13E-01 | 2.03E-03 | 1.38E-01 |
| FAM162B   | 5.62E+01 | -1.68E+00 | 5.45E-01 | 2.05E-03 | 1.39E-01 |
| CRYGN     | 1.16E+02 | -1.48E+00 | 4.81E-01 | 2.11E-03 | 1.41E-01 |
| MESTIT1   | 1.40E+01 | -1.64E+00 | 5.35E-01 | 2.10E-03 | 1.41E-01 |
| WDR25     | 1.02E+02 | 1.01E+00  | 3.28E-01 | 2.11E-03 | 1.41E-01 |
| DPP10     | 2.38E+01 | 1.66E+00  | 5.42E-01 | 2.13E-03 | 1.42E-01 |
| PRPF39    | 2.84E+02 | 6.74E-01  | 2.20E-01 | 2.13E-03 | 1.42E-01 |
| KIF4A     | 3.93E+01 | 1.10E+00  | 3.58E-01 | 2.17E-03 | 1.43E-01 |
| MAP3K13   | 4.42E+02 | -6.22E-01 | 2.03E-01 | 2.17E-03 | 1.43E-01 |
| ZNF521    | 4.05E+02 | 1.67E+00  | 5.45E-01 | 2.18E-03 | 1.43E-01 |
| PDS5B     | 1.16E+03 | 6.16E-01  | 2.01E-01 | 2.20E-03 | 1.44E-01 |
| PDPR      | 1.31E+03 | -8.24E-01 | 2.69E-01 | 2.23E-03 | 1.45E-01 |
| TDP1      | 1.15E+02 | 8.07E-01  | 2.64E-01 | 2.26E-03 | 1.47E-01 |
| ZCCHC14   | 9.43E+02 | -7.48E-01 | 2.45E-01 | 2.30E-03 | 1.48E-01 |
| RPS10P7   | 2.25E+01 | -1.16E+00 | 3.82E-01 | 2.31E-03 | 1.49E-01 |
| GPAT2     | 9.98E+00 | 1.65E+00  | 5.45E-01 | 2.38E-03 | 1.51E-01 |
| TFE3      | 9.28E+02 | 4.33E-01  | 1.42E-01 | 2.36E-03 | 1.51E-01 |
| TRIM5     | 9.14E+02 | 7.39E-01  | 2.43E-01 | 2.37E-03 | 1.51E-01 |
| DECR1     | 5.06E+02 | -1.20E+00 | 3.97E-01 | 2.40E-03 | 1.52E-01 |
| KLF12     | 1.40E+03 | 6.86E-01  | 2.26E-01 | 2.43E-03 | 1.53E-01 |
| NCOA3     | 2.36E+03 | 6.93E-01  | 2.29E-01 | 2.43E-03 | 1.53E-01 |
| ARHGAP5   | 3.11E+03 | 7.26E-01  | 2.40E-01 | 2.45E-03 | 1.53E-01 |
| CTPS2     | 3.35E+02 | 6.48E-01  | 2.14E-01 | 2.48E-03 | 1.54E-01 |
| MOXD1     | 4.63E+00 | 1.65E+00  | 5.45E-01 | 2.51E-03 | 1.56E-01 |
| KTN1      | 2.87E+03 | 8.59E-01  | 2.84E-01 | 2.52E-03 | 1.56E-01 |
| LGI3      | 5.54E+01 | 1.55E+00  | 5.12E-01 | 2.56E-03 | 1.58E-01 |
| CR1       | 1.92E+01 | 1.62E+00  | 5.39E-01 | 2.59E-03 | 1.58E-01 |
| MACC1     | 2.00E+01 | -1.24E+00 | 4.10E-01 | 2.59E-03 | 1.58E-01 |
| VRK1      | 7.20E+01 | 9.34E-01  | 3.10E-01 | 2.60E-03 | 1.58E-01 |

|            |          |           |          |          |          |
|------------|----------|-----------|----------|----------|----------|
| GADL1      | 1.61E+01 | -1.64E+00 | 5.44E-01 | 2.64E-03 | 1.58E-01 |
| LOC1005066 | 8.66E+01 | -1.63E+00 | 5.43E-01 | 2.62E-03 | 1.58E-01 |
| PAN3       | 1.07E+03 | 5.34E-01  | 1.78E-01 | 2.64E-03 | 1.58E-01 |
| SCNN1G     | 4.48E+00 | 1.52E+00  | 5.04E-01 | 2.62E-03 | 1.58E-01 |
| GNG7       | 2.68E+02 | -1.12E+00 | 3.72E-01 | 2.65E-03 | 1.58E-01 |
| ACKR3      | 8.94E+02 | -1.40E+00 | 4.69E-01 | 2.81E-03 | 1.61E-01 |
| DGCR9      | 1.29E+01 | -1.42E+00 | 4.73E-01 | 2.72E-03 | 1.61E-01 |
| ERO1L      | 8.83E+02 | 9.51E-01  | 3.18E-01 | 2.79E-03 | 1.61E-01 |
| FAM91A1    | 3.11E+03 | -1.27E+00 | 4.25E-01 | 2.79E-03 | 1.61E-01 |
| GPC5       | 1.53E+01 | -1.62E+00 | 5.40E-01 | 2.74E-03 | 1.61E-01 |
| HDAC9      | 3.95E+02 | -1.32E+00 | 4.41E-01 | 2.79E-03 | 1.61E-01 |
| LOC283299  | 6.93E+00 | 1.62E+00  | 5.40E-01 | 2.74E-03 | 1.61E-01 |
| LOC654841  | 1.16E+01 | -1.41E+00 | 4.71E-01 | 2.81E-03 | 1.61E-01 |
| MTMR2      | 8.90E+02 | 1.08E+00  | 3.62E-01 | 2.79E-03 | 1.61E-01 |
| SGK223     | 5.37E+02 | -1.61E+00 | 5.37E-01 | 2.75E-03 | 1.61E-01 |
| SLC39A14   | 8.40E+02 | -1.43E+00 | 4.76E-01 | 2.72E-03 | 1.61E-01 |
| SNRNP35    | 1.73E+02 | 3.91E-01  | 1.30E-01 | 2.71E-03 | 1.61E-01 |
| ADCY10P1   | 3.97E+01 | -1.07E+00 | 3.60E-01 | 2.83E-03 | 1.61E-01 |
| GLI3       | 6.33E+02 | -1.07E+00 | 3.58E-01 | 2.89E-03 | 1.61E-01 |
| LEPREL1    | 1.76E+02 | -1.53E+00 | 5.12E-01 | 2.86E-03 | 1.61E-01 |
| LOC1019295 | 9.29E+00 | -1.62E+00 | 5.42E-01 | 2.88E-03 | 1.61E-01 |
| LUM        | 3.45E+02 | -1.62E+00 | 5.45E-01 | 2.90E-03 | 1.61E-01 |
| MBNL1-AS1  | 5.73E+01 | 1.04E+00  | 3.50E-01 | 2.90E-03 | 1.61E-01 |
| POP5       | 1.44E+02 | -5.35E-01 | 1.79E-01 | 2.87E-03 | 1.61E-01 |
| ZNF740     | 5.14E+02 | 4.67E-01  | 1.57E-01 | 2.89E-03 | 1.61E-01 |
| IFI6       | 3.96E+02 | 1.07E+00  | 3.58E-01 | 2.93E-03 | 1.62E-01 |
| GLIS2      | 9.64E+02 | -6.52E-01 | 2.19E-01 | 2.95E-03 | 1.63E-01 |
| ADCY1      | 1.56E+02 | 1.40E+00  | 4.77E-01 | 3.24E-03 | 1.63E-01 |
| CHST2      | 1.71E+02 | 1.37E+00  | 4.61E-01 | 3.04E-03 | 1.63E-01 |
| CKMT1B     | 8.51E+00 | -1.61E+00 | 5.45E-01 | 3.18E-03 | 1.63E-01 |
| COP22      | 9.09E+02 | -7.41E-01 | 2.51E-01 | 3.16E-03 | 1.63E-01 |
| CSE1L      | 1.09E+03 | 5.95E-01  | 2.02E-01 | 3.15E-03 | 1.63E-01 |
| CSTB       | 8.60E+02 | 1.07E+00  | 3.62E-01 | 3.10E-03 | 1.63E-01 |
| DPY19L1    | 9.06E+02 | -7.37E-01 | 2.50E-01 | 3.20E-03 | 1.63E-01 |
| EPN3       | 2.64E+01 | -1.60E+00 | 5.40E-01 | 3.02E-03 | 1.63E-01 |
| ERV3-1     | 6.97E+02 | -7.88E-01 | 2.67E-01 | 3.20E-03 | 1.63E-01 |
| ESM1       | 8.16E+01 | 1.46E+00  | 4.92E-01 | 3.11E-03 | 1.63E-01 |
| EXOC5      | 8.49E+02 | 8.22E-01  | 2.78E-01 | 3.14E-03 | 1.63E-01 |
| GOLGA6L9   | 1.63E+01 | 1.20E+00  | 4.07E-01 | 3.25E-03 | 1.63E-01 |
| HLA-H      | 1.62E+01 | 1.22E+00  | 4.14E-01 | 3.21E-03 | 1.63E-01 |
| IRF9       | 3.67E+02 | 9.05E-01  | 3.08E-01 | 3.26E-03 | 1.63E-01 |
| KIAA0922   | 5.32E+02 | 1.48E+00  | 5.02E-01 | 3.24E-03 | 1.63E-01 |
| KIAA1324   | 8.64E+00 | 1.58E+00  | 5.37E-01 | 3.22E-03 | 1.63E-01 |
| LINC01152  | 4.33E+01 | -1.56E+00 | 5.26E-01 | 3.07E-03 | 1.63E-01 |
| LMO4       | 2.54E+03 | -1.34E+00 | 4.54E-01 | 3.27E-03 | 1.63E-01 |
| LRIG3      | 5.44E+02 | 1.08E+00  | 3.65E-01 | 3.07E-03 | 1.63E-01 |
| LSAMP      | 5.53E+01 | -1.61E+00 | 5.42E-01 | 3.01E-03 | 1.63E-01 |
| LTBP1      | 1.41E+03 | -1.45E+00 | 4.91E-01 | 3.23E-03 | 1.63E-01 |
| MPP5       | 4.44E+02 | 8.61E-01  | 2.91E-01 | 3.11E-03 | 1.63E-01 |
| RHEB       | 9.15E+02 | -7.36E-01 | 2.50E-01 | 3.19E-03 | 1.63E-01 |
| RTKN       | 2.38E+02 | -7.59E-01 | 2.57E-01 | 3.19E-03 | 1.63E-01 |
| SDPR       | 9.01E+02 | 1.14E+00  | 3.85E-01 | 3.14E-03 | 1.63E-01 |
| STK38      | 1.15E+03 | 6.95E-01  | 2.35E-01 | 3.12E-03 | 1.63E-01 |

|             |          |           |          |          |          |
|-------------|----------|-----------|----------|----------|----------|
| STXBP6      | 3.51E+02 | 1.47E+00  | 4.97E-01 | 3.04E-03 | 1.63E-01 |
| TSC22D1-AS1 | 2.68E+01 | 1.25E+00  | 4.24E-01 | 3.17E-03 | 1.63E-01 |
| UGT8        | 1.83E+01 | -1.59E+00 | 5.42E-01 | 3.25E-03 | 1.63E-01 |
| ZBTB42      | 5.05E+01 | 1.20E+00  | 4.06E-01 | 3.06E-03 | 1.63E-01 |
| CFL2        | 5.88E+02 | 6.20E-01  | 2.11E-01 | 3.30E-03 | 1.64E-01 |
| GNG4        | 1.51E+02 | 1.52E+00  | 5.18E-01 | 3.29E-03 | 1.64E-01 |
| SEMA4G      | 9.05E+01 | 1.17E+00  | 3.99E-01 | 3.30E-03 | 1.64E-01 |
| ARHGEF7     | 1.62E+03 | 8.91E-01  | 3.04E-01 | 3.42E-03 | 1.67E-01 |
| ERAP2       | 5.08E+02 | 1.50E+00  | 5.10E-01 | 3.40E-03 | 1.67E-01 |
| IFIT1       | 3.70E+02 | 1.06E+00  | 3.64E-01 | 3.41E-03 | 1.67E-01 |
| LYSMD4      | 1.51E+02 | 8.73E-01  | 2.98E-01 | 3.41E-03 | 1.67E-01 |
| TNNI3       | 5.56E+00 | 1.60E+00  | 5.45E-01 | 3.40E-03 | 1.67E-01 |
| ST8SIA1     | 2.14E+01 | -1.53E+00 | 5.23E-01 | 3.43E-03 | 1.67E-01 |
| DENND5B     | 3.12E+02 | 7.19E-01  | 2.46E-01 | 3.44E-03 | 1.67E-01 |
| SLC27A6     | 8.01E+01 | -1.59E+00 | 5.43E-01 | 3.47E-03 | 1.68E-01 |
| PTH2R       | 1.94E+01 | -1.59E+00 | 5.45E-01 | 3.50E-03 | 1.69E-01 |
| ANGPTL7     | 1.00E+02 | 1.54E+00  | 5.27E-01 | 3.53E-03 | 1.69E-01 |
| KCNK10      | 1.00E+01 | -1.58E+00 | 5.43E-01 | 3.53E-03 | 1.69E-01 |
| CDK10       | 2.82E+02 | -5.27E-01 | 1.81E-01 | 3.55E-03 | 1.70E-01 |
| ABHD12      | 4.92E+02 | 8.22E-01  | 2.83E-01 | 3.61E-03 | 1.71E-01 |
| FAM189A2    | 3.76E+01 | 1.28E+00  | 4.40E-01 | 3.63E-03 | 1.71E-01 |
| GK5         | 1.18E+03 | 9.44E-01  | 3.24E-01 | 3.60E-03 | 1.71E-01 |
| METTL25     | 8.91E+01 | 7.84E-01  | 2.69E-01 | 3.63E-03 | 1.71E-01 |
| PF4         | 4.25E+00 | 1.49E+00  | 5.12E-01 | 3.63E-03 | 1.71E-01 |
| TNFSF10     | 3.73E+02 | -1.32E+00 | 4.56E-01 | 3.70E-03 | 1.74E-01 |
| ABCC3       | 6.91E+01 | -1.37E+00 | 4.73E-01 | 3.73E-03 | 1.74E-01 |
| ABHD10      | 4.22E+02 | -4.71E-01 | 1.62E-01 | 3.73E-03 | 1.74E-01 |
| MMP14       | 2.57E+03 | 7.96E-01  | 2.75E-01 | 3.81E-03 | 1.77E-01 |
| MED7        | 1.04E+02 | 5.72E-01  | 1.98E-01 | 3.83E-03 | 1.77E-01 |
| MED6        | 1.96E+02 | 8.67E-01  | 3.00E-01 | 3.88E-03 | 1.79E-01 |
| MGC16275    | 1.72E+01 | 1.05E+00  | 3.63E-01 | 3.89E-03 | 1.79E-01 |
| ZNF33B      | 4.66E+02 | 9.54E-01  | 3.30E-01 | 3.87E-03 | 1.79E-01 |
| CCDC40      | 9.17E+01 | -8.95E-01 | 3.10E-01 | 3.91E-03 | 1.79E-01 |
| SLC12A5     | 1.41E+01 | -1.36E+00 | 4.73E-01 | 3.91E-03 | 1.79E-01 |
| TATDN2      | 9.70E+02 | -6.05E-01 | 2.10E-01 | 3.93E-03 | 1.79E-01 |
| SIDT1       | 8.92E+01 | -1.51E+00 | 5.25E-01 | 3.95E-03 | 1.80E-01 |
| CDC42SE2    | 6.13E+02 | 5.95E-01  | 2.07E-01 | 4.00E-03 | 1.81E-01 |
| TLR10       | 2.82E+01 | -1.48E+00 | 5.15E-01 | 4.00E-03 | 1.81E-01 |
| ALX4        | 7.99E+02 | -1.46E+00 | 5.09E-01 | 4.04E-03 | 1.82E-01 |
| GRK5        | 2.69E+02 | 1.07E+00  | 3.74E-01 | 4.06E-03 | 1.82E-01 |
| PIM2        | 9.66E+01 | -6.63E-01 | 2.31E-01 | 4.06E-03 | 1.82E-01 |
| SUCLG2-AS1  | 4.05E+01 | -1.02E+00 | 3.55E-01 | 4.08E-03 | 1.82E-01 |
| ZNF430      | 1.85E+02 | 6.85E-01  | 2.39E-01 | 4.08E-03 | 1.82E-01 |
| DOCK10      | 3.71E+02 | -1.02E+00 | 3.55E-01 | 4.11E-03 | 1.82E-01 |
| FAM171B     | 9.50E+02 | -9.57E-01 | 3.34E-01 | 4.11E-03 | 1.82E-01 |
| ATP11C      | 7.80E+02 | 1.30E+00  | 4.53E-01 | 4.18E-03 | 1.84E-01 |
| ADAM20P1    | 5.42E+01 | 1.25E+00  | 4.37E-01 | 4.24E-03 | 1.86E-01 |
| ADAM33      | 7.30E+02 | 1.26E+00  | 4.39E-01 | 4.24E-03 | 1.86E-01 |
| MT1M        | 4.78E+00 | -1.55E+00 | 5.44E-01 | 4.29E-03 | 1.88E-01 |
| ZIC1        | 3.63E+03 | -1.39E+00 | 4.86E-01 | 4.29E-03 | 1.88E-01 |
| LOXL2       | 1.86E+02 | 1.32E+00  | 4.63E-01 | 4.31E-03 | 1.88E-01 |
| GRM3        | 1.44E+01 | -1.55E+00 | 5.44E-01 | 4.37E-03 | 1.89E-01 |
| TUBB1       | 1.20E+01 | 1.54E+00  | 5.41E-01 | 4.37E-03 | 1.89E-01 |

|           |          |           |          |          |          |
|-----------|----------|-----------|----------|----------|----------|
| WDFY3-AS2 | 4.16E+01 | -1.18E+00 | 4.13E-01 | 4.37E-03 | 1.89E-01 |
| G2E3      | 2.60E+02 | 7.02E-01  | 2.47E-01 | 4.41E-03 | 1.90E-01 |
| RPS2      | 6.24E+03 | -6.68E-01 | 2.34E-01 | 4.41E-03 | 1.90E-01 |
| ARHGAP26  | 7.80E+02 | 1.27E+00  | 4.45E-01 | 4.47E-03 | 1.92E-01 |
| DLG5-AS1  | 6.51E+00 | 1.47E+00  | 5.16E-01 | 4.48E-03 | 1.92E-01 |
| NT5DC3    | 1.62E+03 | 1.42E+00  | 5.00E-01 | 4.49E-03 | 1.92E-01 |
| ANKS1A    | 1.27E+03 | 7.28E-01  | 2.56E-01 | 4.53E-03 | 1.93E-01 |
| INPP1     | 1.68E+02 | -6.83E-01 | 2.41E-01 | 4.57E-03 | 1.94E-01 |
| SEL1L     | 1.87E+03 | 6.55E-01  | 2.31E-01 | 4.58E-03 | 1.94E-01 |
| SLC5A3    | 1.19E+03 | 1.05E+00  | 3.70E-01 | 4.59E-03 | 1.94E-01 |
| TGFB2     | 2.34E+03 | -1.30E+00 | 4.57E-01 | 4.62E-03 | 1.94E-01 |
| OR56B1    | 5.56E+00 | 1.40E+00  | 4.93E-01 | 4.63E-03 | 1.94E-01 |
| BMP5      | 2.79E+03 | -1.54E+00 | 5.43E-01 | 4.69E-03 | 1.95E-01 |
| PNMA3     | 9.41E+01 | -1.09E+00 | 3.84E-01 | 4.67E-03 | 1.95E-01 |
| SLC7A7    | 3.73E+02 | 1.46E+00  | 5.17E-01 | 4.69E-03 | 1.95E-01 |
| SPSB1     | 1.02E+02 | 1.29E+00  | 4.56E-01 | 4.69E-03 | 1.95E-01 |
| CEP170B   | 5.85E+02 | 7.95E-01  | 2.81E-01 | 4.72E-03 | 1.95E-01 |
| RGS4      | 3.03E+01 | 1.50E+00  | 5.29E-01 | 4.71E-03 | 1.95E-01 |
| DZIP3     | 6.20E+02 | -4.92E-01 | 1.74E-01 | 4.75E-03 | 1.96E-01 |
| FMR1      | 9.51E+02 | 5.81E-01  | 2.06E-01 | 4.77E-03 | 1.96E-01 |
| MAP4K5    | 5.81E+02 | 6.94E-01  | 2.46E-01 | 4.79E-03 | 1.96E-01 |
| RBM25     | 1.46E+03 | 7.76E-01  | 2.75E-01 | 4.80E-03 | 1.96E-01 |
| SLC38A2   | 1.66E+04 | -8.38E-01 | 2.97E-01 | 4.82E-03 | 1.97E-01 |
| ADAMTS16  | 7.52E+00 | 1.49E+00  | 5.30E-01 | 4.85E-03 | 1.97E-01 |
| NUDT4     | 9.14E+01 | 1.18E+00  | 4.20E-01 | 4.86E-03 | 1.97E-01 |
| CRIPAK    | 2.42E+02 | 1.00E+00  | 3.56E-01 | 4.95E-03 | 1.97E-01 |
| DLG2      | 1.27E+02 | -1.25E+00 | 4.43E-01 | 4.90E-03 | 1.97E-01 |
| FBLN5     | 8.19E+02 | 1.07E+00  | 3.82E-01 | 4.92E-03 | 1.97E-01 |
| GID8      | 8.56E+02 | 7.36E-01  | 2.62E-01 | 4.94E-03 | 1.97E-01 |
| GOLGA5    | 5.15E+02 | 6.67E-01  | 2.37E-01 | 4.90E-03 | 1.97E-01 |
| JADE3     | 2.76E+02 | -5.75E-01 | 2.04E-01 | 4.90E-03 | 1.97E-01 |
| ZNF827    | 2.93E+02 | -9.25E-01 | 3.29E-01 | 4.94E-03 | 1.97E-01 |
| CARD6     | 2.26E+02 | -6.93E-01 | 2.47E-01 | 5.02E-03 | 2.00E-01 |
| ZNF536    | 2.05E+02 | 1.21E+00  | 4.32E-01 | 5.08E-03 | 2.02E-01 |
| CTU2      | 9.97E+01 | -6.16E-01 | 2.20E-01 | 5.13E-03 | 2.02E-01 |
| MBTPS2    | 4.35E+02 | 4.81E-01  | 1.72E-01 | 5.12E-03 | 2.02E-01 |
| PAIP1     | 5.62E+02 | 3.18E-01  | 1.14E-01 | 5.13E-03 | 2.02E-01 |
| RTEL1     | 1.40E+01 | 1.15E+00  | 4.12E-01 | 5.16E-03 | 2.03E-01 |
| HAUS6     | 3.15E+02 | 4.78E-01  | 1.71E-01 | 5.18E-03 | 2.03E-01 |
| BRAF      | 4.17E+02 | -3.80E-01 | 1.36E-01 | 5.22E-03 | 2.03E-01 |
| PLBD1     | 4.27E+02 | -1.16E+00 | 4.17E-01 | 5.21E-03 | 2.03E-01 |
| WARS      | 5.79E+02 | 8.04E-01  | 2.88E-01 | 5.22E-03 | 2.03E-01 |
| PLP1      | 3.36E+02 | -1.52E+00 | 5.45E-01 | 5.26E-03 | 2.04E-01 |
| HCN2      | 5.95E+01 | -1.44E+00 | 5.18E-01 | 5.30E-03 | 2.05E-01 |
| SCN2A     | 4.10E+01 | -1.52E+00 | 5.45E-01 | 5.31E-03 | 2.05E-01 |
| ZNF117    | 1.07E+03 | -6.51E-01 | 2.34E-01 | 5.37E-03 | 2.07E-01 |
| ARHGAP29  | 1.51E+03 | 1.19E+00  | 4.27E-01 | 5.43E-03 | 2.09E-01 |
| FCF1      | 3.03E+02 | 6.88E-01  | 2.48E-01 | 5.44E-03 | 2.09E-01 |
| MEF2C     | 1.57E+03 | -1.02E+00 | 3.68E-01 | 5.45E-03 | 2.09E-01 |
| ERMN      | 2.57E+01 | -1.51E+00 | 5.44E-01 | 5.50E-03 | 2.09E-01 |
| RNF19A    | 1.12E+03 | -6.23E-01 | 2.24E-01 | 5.49E-03 | 2.09E-01 |
| ZNF714    | 2.81E+02 | 1.10E+00  | 3.98E-01 | 5.51E-03 | 2.09E-01 |
| ATXN1     | 2.25E+03 | 8.88E-01  | 3.20E-01 | 5.55E-03 | 2.10E-01 |



|            |          |           |          |          |          |
|------------|----------|-----------|----------|----------|----------|
| GDF10      | 2.70E+01 | -1.50E+00 | 5.41E-01 | 5.58E-03 | 2.11E-01 |
| MTURN      | 1.25E+03 | -9.35E-01 | 3.38E-01 | 5.60E-03 | 2.11E-01 |
| RAPGEF4    | 4.79E+02 | 1.02E+00  | 3.67E-01 | 5.62E-03 | 2.11E-01 |
| TRPC6      | 4.65E+01 | 1.43E+00  | 5.17E-01 | 5.62E-03 | 2.11E-01 |
| NRDE2      | 2.35E+02 | 7.87E-01  | 2.84E-01 | 5.65E-03 | 2.11E-01 |
| USP10      | 6.83E+02 | -5.28E-01 | 1.91E-01 | 5.67E-03 | 2.12E-01 |
| IGFBP6     | 1.81E+03 | 1.33E+00  | 4.79E-01 | 5.69E-03 | 2.12E-01 |
| ITGB8      | 1.93E+03 | -1.18E+00 | 4.29E-01 | 5.73E-03 | 2.13E-01 |
| SRP54      | 4.63E+02 | 6.76E-01  | 2.45E-01 | 5.72E-03 | 2.13E-01 |
| BAIAP2L1   | 3.17E+01 | 1.44E+00  | 5.23E-01 | 5.84E-03 | 2.13E-01 |
| DIRAS1     | 7.00E+01 | -1.47E+00 | 5.31E-01 | 5.78E-03 | 2.13E-01 |
| EPB41L5    | 1.84E+03 | 1.21E+00  | 4.38E-01 | 5.82E-03 | 2.13E-01 |
| ERICH2     | 5.54E+00 | 1.42E+00  | 5.16E-01 | 5.84E-03 | 2.13E-01 |
| GSTM4      | 1.55E+02 | -9.59E-01 | 3.47E-01 | 5.77E-03 | 2.13E-01 |
| LINC00570  | 4.64E+00 | -1.49E+00 | 5.42E-01 | 5.82E-03 | 2.13E-01 |
| SRRM3      | 3.24E+01 | -1.46E+00 | 5.31E-01 | 5.80E-03 | 2.13E-01 |
| PPP2R5A    | 2.79E+02 | 7.74E-01  | 2.81E-01 | 5.87E-03 | 2.14E-01 |
| LINC00494  | 1.06E+01 | 1.34E+00  | 4.87E-01 | 5.88E-03 | 2.14E-01 |
| TFAP4      | 6.78E+01 | -1.02E+00 | 3.72E-01 | 5.98E-03 | 2.17E-01 |
| CDK5RAP1   | 2.49E+02 | 6.60E-01  | 2.41E-01 | 6.07E-03 | 2.19E-01 |
| MET        | 3.43E+03 | -1.14E+00 | 4.14E-01 | 6.09E-03 | 2.19E-01 |
| NOTCH3     | 3.94E+03 | 1.06E+00  | 3.87E-01 | 6.09E-03 | 2.19E-01 |
| SATB1      | 2.10E+02 | -1.04E+00 | 3.77E-01 | 6.10E-03 | 2.19E-01 |
| USP6       | 1.36E+01 | -1.42E+00 | 5.18E-01 | 6.05E-03 | 2.19E-01 |
| ARHGAP35   | 2.84E+03 | 6.87E-01  | 2.51E-01 | 6.25E-03 | 2.21E-01 |
| EMC2       | 3.28E+02 | -5.55E-01 | 2.03E-01 | 6.25E-03 | 2.21E-01 |
| GOT2       | 8.33E+02 | -6.34E-01 | 2.32E-01 | 6.24E-03 | 2.21E-01 |
| KATNAL2    | 1.49E+02 | -1.26E+00 | 4.61E-01 | 6.23E-03 | 2.21E-01 |
| PLCL1      | 1.74E+02 | 1.11E+00  | 4.06E-01 | 6.26E-03 | 2.21E-01 |
| RHBDL1     | 2.07E+01 | -1.19E+00 | 4.36E-01 | 6.25E-03 | 2.21E-01 |
| TRDMT1     | 2.01E+02 | 7.20E-01  | 2.63E-01 | 6.21E-03 | 2.21E-01 |
| ATP5S      | 8.87E+01 | 7.80E-01  | 2.86E-01 | 6.42E-03 | 2.23E-01 |
| CRTC3      | 5.87E+02 | 6.71E-01  | 2.46E-01 | 6.38E-03 | 2.23E-01 |
| IGSF9B     | 3.41E+02 | 1.03E+00  | 3.78E-01 | 6.37E-03 | 2.23E-01 |
| NAPB       | 2.87E+02 | 6.93E-01  | 2.54E-01 | 6.43E-03 | 2.23E-01 |
| PSMA3      | 2.96E+02 | 6.85E-01  | 2.51E-01 | 6.34E-03 | 2.23E-01 |
| RCAN1      | 3.41E+02 | 7.73E-01  | 2.84E-01 | 6.42E-03 | 2.23E-01 |
| TREM2      | 1.92E+02 | -1.16E+00 | 4.26E-01 | 6.43E-03 | 2.23E-01 |
| CACNA2D3   | 1.18E+03 | -1.19E+00 | 4.38E-01 | 6.54E-03 | 2.24E-01 |
| CEND1      | 9.57E+01 | -1.48E+00 | 5.45E-01 | 6.56E-03 | 2.24E-01 |
| CHCHD5     | 8.58E+01 | -5.77E-01 | 2.12E-01 | 6.54E-03 | 2.24E-01 |
| ENTPD6     | 1.13E+03 | 9.64E-01  | 3.54E-01 | 6.47E-03 | 2.24E-01 |
| FKBP4      | 5.64E+02 | -8.92E-01 | 3.28E-01 | 6.52E-03 | 2.24E-01 |
| LOC1019271 | 1.09E+01 | 1.13E+00  | 4.16E-01 | 6.52E-03 | 2.24E-01 |
| PARP14     | 1.78E+03 | 3.35E-01  | 1.23E-01 | 6.47E-03 | 2.24E-01 |
| SUPT20H    | 5.30E+02 | 4.69E-01  | 1.73E-01 | 6.56E-03 | 2.24E-01 |
| TRMT44     | 2.01E+02 | 5.97E-01  | 2.19E-01 | 6.49E-03 | 2.24E-01 |
| KRT8       | 6.50E+01 | 1.21E+00  | 4.45E-01 | 6.61E-03 | 2.25E-01 |
| ALG1L9P    | 1.65E+01 | 1.05E+00  | 3.87E-01 | 6.72E-03 | 2.25E-01 |
| C20orf196  | 1.44E+01 | 1.07E+00  | 3.93E-01 | 6.68E-03 | 2.25E-01 |
| FAM174B    | 1.31E+02 | 1.29E+00  | 4.74E-01 | 6.69E-03 | 2.25E-01 |
| IFNAR1     | 1.45E+03 | 4.67E-01  | 1.72E-01 | 6.71E-03 | 2.25E-01 |
| OCLN       | 2.19E+02 | 1.05E+00  | 3.85E-01 | 6.68E-03 | 2.25E-01 |

|           |          |           |          |          |          |
|-----------|----------|-----------|----------|----------|----------|
| SPR       | 7.87E+01 | -9.90E-01 | 3.65E-01 | 6.73E-03 | 2.25E-01 |
| STC2      | 2.47E+02 | 1.47E+00  | 5.43E-01 | 6.67E-03 | 2.25E-01 |
| ZNF133    | 2.21E+02 | 6.93E-01  | 2.56E-01 | 6.73E-03 | 2.25E-01 |
| KLHDC8B   | 2.45E+02 | 8.36E-01  | 3.09E-01 | 6.75E-03 | 2.25E-01 |
| HGF       | 4.40E+01 | -1.19E+00 | 4.41E-01 | 6.77E-03 | 2.25E-01 |
| LSM14B    | 4.41E+02 | 7.66E-01  | 2.83E-01 | 6.81E-03 | 2.26E-01 |
| MPP3      | 8.41E+01 | 1.07E+00  | 3.97E-01 | 6.82E-03 | 2.26E-01 |
| GAA       | 7.32E+02 | -7.01E-01 | 2.59E-01 | 6.84E-03 | 2.26E-01 |
| ANK2      | 4.80E+03 | -1.46E+00 | 5.39E-01 | 6.93E-03 | 2.27E-01 |
| CIITA     | 3.44E+02 | -1.19E+00 | 4.42E-01 | 6.97E-03 | 2.27E-01 |
| CLIC4     | 3.66E+03 | 9.39E-01  | 3.47E-01 | 6.89E-03 | 2.27E-01 |
| IQGAP3    | 1.24E+02 | 8.81E-01  | 3.26E-01 | 6.95E-03 | 2.27E-01 |
| OIT3      | 3.83E+00 | 1.42E+00  | 5.28E-01 | 6.94E-03 | 2.27E-01 |
| PPP1R1B   | 1.41E+02 | 1.47E+00  | 5.45E-01 | 6.97E-03 | 2.27E-01 |
| PYGB      | 2.27E+03 | 9.25E-01  | 3.43E-01 | 6.95E-03 | 2.27E-01 |
| TSR2      | 3.54E+02 | 5.79E-01  | 2.14E-01 | 6.90E-03 | 2.27E-01 |
| ID2       | 8.00E+02 | -7.59E-01 | 2.82E-01 | 7.00E-03 | 2.27E-01 |
| NKD2      | 2.06E+01 | -1.46E+00 | 5.41E-01 | 7.07E-03 | 2.28E-01 |
| NOTCH4    | 1.52E+01 | 1.45E+00  | 5.39E-01 | 7.06E-03 | 2.28E-01 |
| P4HA2     | 6.67E+02 | 8.05E-01  | 2.99E-01 | 7.07E-03 | 2.28E-01 |
| ZNF436    | 4.21E+02 | 1.06E+00  | 3.95E-01 | 7.07E-03 | 2.28E-01 |
| VPS4A     | 8.03E+02 | -4.80E-01 | 1.78E-01 | 7.10E-03 | 2.28E-01 |
| HEBP1     | 4.01E+02 | -5.86E-01 | 2.18E-01 | 7.18E-03 | 2.29E-01 |
| LINC00987 | 2.23E+01 | -1.46E+00 | 5.41E-01 | 7.17E-03 | 2.29E-01 |
| PLXNA4    | 7.75E+02 | -1.16E+00 | 4.31E-01 | 7.13E-03 | 2.29E-01 |
| PRDX4     | 3.49E+02 | 7.74E-01  | 2.88E-01 | 7.15E-03 | 2.29E-01 |
| WWP1      | 9.07E+02 | -8.42E-01 | 3.13E-01 | 7.17E-03 | 2.29E-01 |
| FGD4      | 1.12E+03 | 8.52E-01  | 3.17E-01 | 7.24E-03 | 2.29E-01 |
| PWAR1     | 4.37E+01 | 1.17E+00  | 4.37E-01 | 7.24E-03 | 2.29E-01 |
| SMEK1     | 8.22E+02 | 6.61E-01  | 2.46E-01 | 7.21E-03 | 2.29E-01 |
| GAMT      | 6.14E+01 | -8.58E-01 | 3.20E-01 | 7.26E-03 | 2.29E-01 |
| CDC20     | 2.37E+01 | 1.07E+00  | 4.01E-01 | 7.44E-03 | 2.33E-01 |
| CHODL     | 7.05E+01 | -1.46E+00 | 5.44E-01 | 7.40E-03 | 2.33E-01 |
| DNAJC10   | 1.86E+03 | -5.23E-01 | 1.95E-01 | 7.42E-03 | 2.33E-01 |
| SLCO4A1   | 4.30E+01 | 1.37E+00  | 5.11E-01 | 7.44E-03 | 2.33E-01 |
| WDR86     | 1.01E+03 | -8.54E-01 | 3.19E-01 | 7.42E-03 | 2.33E-01 |
| ECSIT     | 1.92E+02 | -8.83E-01 | 3.30E-01 | 7.50E-03 | 2.34E-01 |
| AMT       | 1.50E+02 | -7.32E-01 | 2.74E-01 | 7.59E-03 | 2.34E-01 |
| CCDC7     | 2.81E+02 | 8.49E-01  | 3.18E-01 | 7.60E-03 | 2.34E-01 |
| CDC16     | 8.42E+02 | 5.19E-01  | 1.94E-01 | 7.54E-03 | 2.34E-01 |
| LRP12     | 2.68E+02 | -1.19E+00 | 4.45E-01 | 7.55E-03 | 2.34E-01 |
| PCNX      | 2.03E+03 | 7.17E-01  | 2.68E-01 | 7.57E-03 | 2.34E-01 |
| TRAF7     | 6.63E+02 | -5.47E-01 | 2.05E-01 | 7.56E-03 | 2.34E-01 |
| GBP5      | 3.80E+01 | -1.36E+00 | 5.11E-01 | 7.65E-03 | 2.35E-01 |
| PDE3A     | 5.08E+02 | 1.38E+00  | 5.18E-01 | 7.65E-03 | 2.35E-01 |
| TENM2     | 4.43E+03 | -1.41E+00 | 5.28E-01 | 7.64E-03 | 2.35E-01 |
| ACSM3     | 3.87E+01 | -1.27E+00 | 4.78E-01 | 7.75E-03 | 2.36E-01 |
| CHCHD10   | 7.76E+01 | -1.17E+00 | 4.41E-01 | 7.74E-03 | 2.36E-01 |
| USP31     | 7.47E+02 | 1.00E+00  | 3.76E-01 | 7.72E-03 | 2.36E-01 |
| ZNF829    | 9.27E+01 | 9.26E-01  | 3.48E-01 | 7.74E-03 | 2.36E-01 |
| GSG2      | 1.51E+01 | 1.08E+00  | 4.05E-01 | 7.80E-03 | 2.36E-01 |
| HNMT      | 4.97E+02 | -6.94E-01 | 2.61E-01 | 7.81E-03 | 2.36E-01 |
| SOX2-OT   | 2.37E+01 | -1.43E+00 | 5.38E-01 | 7.78E-03 | 2.36E-01 |

|            |          |           |          |          |          |
|------------|----------|-----------|----------|----------|----------|
| CDC42EP2   | 3.04E+02 | 7.37E-01  | 2.77E-01 | 7.84E-03 | 2.37E-01 |
| GSTM1      | 3.40E+01 | -1.43E+00 | 5.39E-01 | 7.86E-03 | 2.37E-01 |
| PAPOLA     | 1.79E+03 | 5.19E-01  | 1.95E-01 | 7.87E-03 | 2.37E-01 |
| CPZ        | 1.70E+03 | 1.19E+00  | 4.49E-01 | 7.92E-03 | 2.38E-01 |
| CNTN2      | 3.82E+01 | -1.44E+00 | 5.41E-01 | 7.98E-03 | 2.39E-01 |
| CUL1       | 7.99E+02 | -3.81E-01 | 1.44E-01 | 7.99E-03 | 2.39E-01 |
| PACS2      | 8.75E+02 | 6.84E-01  | 2.59E-01 | 8.14E-03 | 2.41E-01 |
| PDGFRL     | 2.21E+02 | -1.29E+00 | 4.86E-01 | 8.10E-03 | 2.41E-01 |
| PTPN21     | 5.82E+02 | 8.20E-01  | 3.10E-01 | 8.11E-03 | 2.41E-01 |
| SSBP2      | 6.78E+02 | 1.00E+00  | 3.79E-01 | 8.08E-03 | 2.41E-01 |
| STK35      | 9.30E+02 | 1.08E+00  | 4.08E-01 | 8.14E-03 | 2.41E-01 |
| USP46      | 3.65E+02 | 5.69E-01  | 2.15E-01 | 8.11E-03 | 2.41E-01 |
| LOC1019273 | 2.75E+00 | 1.38E+00  | 5.21E-01 | 8.21E-03 | 2.42E-01 |
| PTPRA      | 1.31E+03 | 7.12E-01  | 2.69E-01 | 8.21E-03 | 2.42E-01 |
| SYCP2L     | 3.74E+01 | -1.32E+00 | 5.00E-01 | 8.19E-03 | 2.42E-01 |
| PDLIM7     | 8.68E+02 | 8.69E-01  | 3.29E-01 | 8.32E-03 | 2.44E-01 |
| LAMA5      | 5.61E+03 | 1.01E+00  | 3.82E-01 | 8.34E-03 | 2.45E-01 |
| YBX3       | 3.79E+03 | -7.35E-01 | 2.79E-01 | 8.38E-03 | 2.45E-01 |
| MRAP2      | 1.11E+01 | 1.44E+00  | 5.45E-01 | 8.41E-03 | 2.46E-01 |
| ATG2B      | 1.02E+03 | 7.49E-01  | 2.84E-01 | 8.44E-03 | 2.46E-01 |
| KPTN       | 3.93E+01 | 9.58E-01  | 3.64E-01 | 8.48E-03 | 2.47E-01 |
| ATP7B      | 6.61E+02 | 1.31E+00  | 4.98E-01 | 8.52E-03 | 2.47E-01 |
| BNIP3      | 2.00E+02 | 1.18E+00  | 4.47E-01 | 8.55E-03 | 2.47E-01 |
| GBP2       | 2.10E+02 | -9.85E-01 | 3.75E-01 | 8.56E-03 | 2.47E-01 |
| PCDH18     | 5.11E+02 | 1.14E+00  | 4.35E-01 | 8.53E-03 | 2.47E-01 |
| PRSS23     | 2.99E+02 | 1.21E+00  | 4.62E-01 | 8.54E-03 | 2.47E-01 |
| NGLY1      | 2.51E+02 | -5.98E-01 | 2.28E-01 | 8.58E-03 | 2.47E-01 |
| AKAP13     | 8.75E+03 | 7.06E-01  | 2.69E-01 | 8.72E-03 | 2.47E-01 |
| ARL8B      | 8.81E+02 | -4.20E-01 | 1.60E-01 | 8.67E-03 | 2.47E-01 |
| HEATR5A    | 1.06E+03 | 9.80E-01  | 3.74E-01 | 8.77E-03 | 2.47E-01 |
| KCNJ8      | 5.33E+02 | -1.43E+00 | 5.43E-01 | 8.63E-03 | 2.47E-01 |
| LOC1005067 | 2.41E+01 | -9.89E-01 | 3.77E-01 | 8.65E-03 | 2.47E-01 |
| PKHD1L1    | 1.02E+01 | -1.42E+00 | 5.42E-01 | 8.76E-03 | 2.47E-01 |
| PLCH1      | 2.42E+01 | -1.43E+00 | 5.45E-01 | 8.77E-03 | 2.47E-01 |
| RNF145     | 1.40E+03 | 8.02E-01  | 3.06E-01 | 8.71E-03 | 2.47E-01 |
| SRBD1      | 3.53E+02 | -6.91E-01 | 2.63E-01 | 8.65E-03 | 2.47E-01 |
| TENM3      | 7.34E+02 | -1.39E+00 | 5.31E-01 | 8.68E-03 | 2.47E-01 |
| TTYH2      | 2.82E+02 | 7.90E-01  | 3.01E-01 | 8.77E-03 | 2.47E-01 |
| ZDHHC23    | 8.05E+01 | -1.35E+00 | 5.16E-01 | 8.70E-03 | 2.47E-01 |
| OGDHL      | 5.95E+02 | -1.34E+00 | 5.12E-01 | 8.80E-03 | 2.48E-01 |
| F2RL1      | 5.78E+01 | 1.37E+00  | 5.24E-01 | 8.82E-03 | 2.48E-01 |
| MARCH3     | 6.97E+01 | 1.35E+00  | 5.17E-01 | 8.90E-03 | 2.50E-01 |
| LINC01268  | 1.75E+01 | -1.35E+00 | 5.17E-01 | 8.93E-03 | 2.50E-01 |
| PCDHGA6    | 5.69E+02 | 8.44E-01  | 3.23E-01 | 8.95E-03 | 2.50E-01 |
| LINC00842  | 1.18E+02 | 1.31E+00  | 5.03E-01 | 8.98E-03 | 2.50E-01 |
| TLR7       | 1.21E+02 | -1.14E+00 | 4.36E-01 | 9.04E-03 | 2.52E-01 |
| LHFP       | 9.87E+02 | 1.28E+00  | 4.92E-01 | 9.06E-03 | 2.52E-01 |
| TIFA       | 8.90E+01 | -9.09E-01 | 3.48E-01 | 9.09E-03 | 2.52E-01 |
| ZFYVE1     | 2.98E+02 | 7.06E-01  | 2.71E-01 | 9.09E-03 | 2.52E-01 |
| ZNF837     | 1.49E+01 | -1.01E+00 | 3.89E-01 | 9.11E-03 | 2.52E-01 |
| DNM1P35    | 1.63E+01 | -1.17E+00 | 4.49E-01 | 9.20E-03 | 2.53E-01 |
| TNFAIP8    | 2.33E+02 | -7.57E-01 | 2.91E-01 | 9.18E-03 | 2.53E-01 |
| UVSSA      | 4.66E+02 | 7.69E-01  | 2.95E-01 | 9.20E-03 | 2.53E-01 |

|            |          |           |          |          |          |
|------------|----------|-----------|----------|----------|----------|
| WDR20      | 2.38E+02 | 6.33E-01  | 2.43E-01 | 9.19E-03 | 2.53E-01 |
| DDX31      | 2.68E+02 | 7.18E-01  | 2.76E-01 | 9.23E-03 | 2.53E-01 |
| LOC1001304 | 9.83E+00 | 1.37E+00  | 5.28E-01 | 9.23E-03 | 2.53E-01 |
| MLH3       | 7.60E+02 | 6.41E-01  | 2.46E-01 | 9.26E-03 | 2.53E-01 |
| PCYT1B     | 5.20E+01 | -1.37E+00 | 5.28E-01 | 9.26E-03 | 2.53E-01 |
| EML5       | 1.12E+02 | 1.00E+00  | 3.85E-01 | 9.31E-03 | 2.53E-01 |
| GYPC       | 4.30E+02 | -9.25E-01 | 3.56E-01 | 9.30E-03 | 2.53E-01 |
| KIF21B     | 1.05E+02 | -8.57E-01 | 3.30E-01 | 9.32E-03 | 2.53E-01 |
| LOC90246   | 2.97E+01 | -1.42E+00 | 5.45E-01 | 9.35E-03 | 2.53E-01 |
| URI1       | 9.74E+02 | 4.16E-01  | 1.60E-01 | 9.39E-03 | 2.54E-01 |
| ATP10D     | 1.11E+03 | 9.52E-01  | 3.67E-01 | 9.41E-03 | 2.54E-01 |
| ARSD       | 6.30E+02 | -5.77E-01 | 2.22E-01 | 9.46E-03 | 2.55E-01 |
| PTPN9      | 8.73E+02 | 5.29E-01  | 2.04E-01 | 9.48E-03 | 2.55E-01 |
| IRF1       | 2.30E+02 | -7.52E-01 | 2.90E-01 | 9.50E-03 | 2.55E-01 |
| PPBP       | 1.85E+01 | 1.37E+00  | 5.28E-01 | 9.52E-03 | 2.55E-01 |
| KCNQ3      | 3.04E+02 | -1.05E+00 | 4.05E-01 | 9.55E-03 | 2.55E-01 |
| ROM1       | 2.23E+01 | -1.10E+00 | 4.24E-01 | 9.55E-03 | 2.55E-01 |
| ALG14      | 4.66E+01 | 8.75E-01  | 3.38E-01 | 9.61E-03 | 2.56E-01 |
| HNRNPA1P3  | 1.66E+01 | 1.36E+00  | 5.27E-01 | 9.63E-03 | 2.56E-01 |
| RAB11A     | 2.45E+03 | 6.39E-01  | 2.47E-01 | 9.64E-03 | 2.56E-01 |
| SYT15      | 1.86E+02 | 1.22E+00  | 4.70E-01 | 9.61E-03 | 2.56E-01 |
| ADAM22     | 1.70E+02 | -1.31E+00 | 5.06E-01 | 9.78E-03 | 2.58E-01 |
| NANP       | 1.59E+02 | 5.54E-01  | 2.14E-01 | 9.75E-03 | 2.58E-01 |
| NDRG4      | 3.34E+01 | -1.33E+00 | 5.13E-01 | 9.77E-03 | 2.58E-01 |
| OSBP2      | 4.20E+01 | 1.09E+00  | 4.22E-01 | 9.75E-03 | 2.58E-01 |
| TMX4       | 7.28E+02 | 6.69E-01  | 2.59E-01 | 9.88E-03 | 2.60E-01 |
| N4BP3      | 1.60E+02 | 1.10E+00  | 4.26E-01 | 9.89E-03 | 2.60E-01 |
| BCL2L1     | 1.64E+03 | 6.86E-01  | 2.66E-01 | 9.98E-03 | 2.60E-01 |
| DNA2       | 5.56E+01 | 7.67E-01  | 2.98E-01 | 9.94E-03 | 2.60E-01 |
| MOBP       | 4.49E+01 | -1.37E+00 | 5.32E-01 | 9.98E-03 | 2.60E-01 |
| NYAP1      | 4.51E+01 | 1.24E+00  | 4.81E-01 | 9.93E-03 | 2.60E-01 |
| SCARA5     | 9.82E+03 | -1.36E+00 | 5.27E-01 | 1.00E-02 | 2.60E-01 |
| SEC23A     | 1.22E+03 | 7.78E-01  | 3.02E-01 | 1.00E-02 | 2.60E-01 |
| SLC24A2    | 1.46E+01 | -1.38E+00 | 5.37E-01 | 1.00E-02 | 2.60E-01 |
| HSH2D      | 7.48E+00 | 1.24E+00  | 4.83E-01 | 1.01E-02 | 2.61E-01 |
| EFCAB1     | 2.25E+01 | -1.40E+00 | 5.44E-01 | 1.01E-02 | 2.61E-01 |
| PPP1R16B   | 1.42E+02 | 1.03E+00  | 4.01E-01 | 1.01E-02 | 2.62E-01 |
| MAOB       | 2.58E+01 | -1.39E+00 | 5.41E-01 | 1.02E-02 | 2.63E-01 |
| MAPRE1     | 1.46E+03 | 5.38E-01  | 2.10E-01 | 1.03E-02 | 2.65E-01 |
| ERMARD     | 1.64E+02 | 6.48E-01  | 2.53E-01 | 1.03E-02 | 2.65E-01 |
| GMFB       | 6.16E+02 | 6.05E-01  | 2.36E-01 | 1.04E-02 | 2.65E-01 |
| KLHL3      | 4.57E+02 | 1.07E+00  | 4.17E-01 | 1.04E-02 | 2.65E-01 |
| STXBP4     | 3.38E+02 | -8.10E-01 | 3.16E-01 | 1.03E-02 | 2.65E-01 |
| PIGU       | 2.23E+02 | 6.88E-01  | 2.68E-01 | 1.04E-02 | 2.65E-01 |
| ADAT1      | 2.76E+02 | -5.86E-01 | 2.29E-01 | 1.04E-02 | 2.66E-01 |
| AP4S1      | 1.02E+02 | 1.12E+00  | 4.39E-01 | 1.04E-02 | 2.66E-01 |
| ARSK       | 7.21E+01 | 7.93E-01  | 3.10E-01 | 1.05E-02 | 2.67E-01 |
| TRAPPC10   | 1.23E+03 | 6.73E-01  | 2.63E-01 | 1.05E-02 | 2.67E-01 |
| GAB2       | 5.16E+02 | -6.85E-01 | 2.68E-01 | 1.06E-02 | 2.68E-01 |
| TMSB4Y     | 4.84E+00 | 1.21E+00  | 4.73E-01 | 1.06E-02 | 2.68E-01 |
| TNNC2      | 6.32E+00 | 1.25E+00  | 4.90E-01 | 1.06E-02 | 2.69E-01 |
| FBLL1      | 2.52E+01 | -1.35E+00 | 5.30E-01 | 1.07E-02 | 2.71E-01 |
| GPC5-AS1   | 1.08E+02 | -1.37E+00 | 5.36E-01 | 1.08E-02 | 2.71E-01 |

|           |          |           |          |          |          |
|-----------|----------|-----------|----------|----------|----------|
| LINC00948 | 7.99E+00 | -1.35E+00 | 5.29E-01 | 1.08E-02 | 2.71E-01 |
| ZNF488    | 2.17E+01 | 1.27E+00  | 4.98E-01 | 1.08E-02 | 2.71E-01 |
| CDC42BPB  | 2.39E+03 | 8.94E-01  | 3.51E-01 | 1.09E-02 | 2.71E-01 |
| DNASE1L3  | 4.04E+02 | -1.36E+00 | 5.34E-01 | 1.09E-02 | 2.71E-01 |
| MEIS2     | 8.50E+01 | 1.06E+00  | 4.17E-01 | 1.09E-02 | 2.71E-01 |
| NDUFAF4   | 1.11E+02 | -1.01E+00 | 3.95E-01 | 1.09E-02 | 2.71E-01 |
| PCDHAC2   | 9.33E+01 | 1.28E+00  | 5.02E-01 | 1.09E-02 | 2.71E-01 |
| UQCRC2    | 1.35E+03 | -8.51E-01 | 3.34E-01 | 1.09E-02 | 2.71E-01 |
| BRF1      | 2.75E+02 | 7.31E-01  | 2.87E-01 | 1.09E-02 | 2.72E-01 |
| BDKRB2    | 8.00E+01 | 1.38E+00  | 5.42E-01 | 1.10E-02 | 2.72E-01 |
| LGALS12   | 3.21E+00 | 1.39E+00  | 5.45E-01 | 1.10E-02 | 2.72E-01 |
| PLAGL2    | 3.39E+02 | 7.78E-01  | 3.06E-01 | 1.10E-02 | 2.72E-01 |
| RNU6ATAC  | 4.57E+00 | 1.38E+00  | 5.45E-01 | 1.10E-02 | 2.72E-01 |
| SRSF5     | 2.09E+03 | 7.28E-01  | 2.86E-01 | 1.10E-02 | 2.72E-01 |
| TFF3      | 2.36E+01 | 1.39E+00  | 5.45E-01 | 1.10E-02 | 2.72E-01 |
| KIF26B    | 1.97E+01 | -1.27E+00 | 5.00E-01 | 1.11E-02 | 2.72E-01 |
| SNTG2     | 1.71E+01 | 1.31E+00  | 5.18E-01 | 1.13E-02 | 2.78E-01 |
| CHSY1     | 1.83E+03 | 1.15E+00  | 4.53E-01 | 1.14E-02 | 2.78E-01 |
| MCC       | 6.09E+02 | 1.29E+00  | 5.09E-01 | 1.14E-02 | 2.78E-01 |
| MT3       | 4.97E+01 | -1.33E+00 | 5.26E-01 | 1.14E-02 | 2.78E-01 |
| AP1G2     | 5.06E+02 | 9.65E-01  | 3.81E-01 | 1.14E-02 | 2.78E-01 |
| C11orf70  | 3.70E+01 | -9.25E-01 | 3.66E-01 | 1.14E-02 | 2.78E-01 |
| ASXL2     | 1.03E+03 | -5.07E-01 | 2.01E-01 | 1.17E-02 | 2.79E-01 |
| BLOC1S2   | 1.70E+02 | 5.48E-01  | 2.17E-01 | 1.15E-02 | 2.79E-01 |
| CLN6      | 2.91E+02 | 3.71E-01  | 1.47E-01 | 1.15E-02 | 2.79E-01 |
| COX16     | 5.91E+01 | 7.07E-01  | 2.80E-01 | 1.15E-02 | 2.79E-01 |
| DBNDD2    | 9.64E+01 | 1.09E+00  | 4.34E-01 | 1.17E-02 | 2.79E-01 |
| E2F1      | 1.81E+02 | 8.84E-01  | 3.50E-01 | 1.16E-02 | 2.79E-01 |
| EPS8      | 6.95E+02 | 1.15E+00  | 4.55E-01 | 1.16E-02 | 2.79E-01 |
| GABARAPL1 | 1.93E+03 | -7.75E-01 | 3.07E-01 | 1.16E-02 | 2.79E-01 |
| GPRC5B    | 2.56E+02 | 1.23E+00  | 4.88E-01 | 1.15E-02 | 2.79E-01 |
| IER5      | 2.59E+02 | 7.79E-01  | 3.09E-01 | 1.16E-02 | 2.79E-01 |
| LINC00852 | 3.98E+01 | -1.01E+00 | 4.00E-01 | 1.17E-02 | 2.79E-01 |
| PCBP4     | 3.74E+02 | -7.74E-01 | 3.06E-01 | 1.16E-02 | 2.79E-01 |
| RAB3D     | 1.33E+03 | 9.35E-01  | 3.70E-01 | 1.15E-02 | 2.79E-01 |
| RAPGEF5   | 6.76E+02 | 1.12E+00  | 4.44E-01 | 1.17E-02 | 2.79E-01 |
| TMEM251   | 6.20E+01 | 8.65E-01  | 3.43E-01 | 1.17E-02 | 2.79E-01 |
| UACA      | 3.40E+03 | 7.80E-01  | 3.09E-01 | 1.17E-02 | 2.79E-01 |
| UBE2H     | 1.76E+03 | 7.34E-01  | 2.91E-01 | 1.17E-02 | 2.79E-01 |
| KCNK13    | 1.69E+01 | -1.23E+00 | 4.89E-01 | 1.18E-02 | 2.80E-01 |
| ARID2     | 1.67E+03 | 4.38E-01  | 1.74E-01 | 1.19E-02 | 2.80E-01 |
| DFNB31    | 1.84E+02 | -9.53E-01 | 3.79E-01 | 1.19E-02 | 2.80E-01 |
| MRPS25    | 9.13E+02 | -8.27E-01 | 3.29E-01 | 1.19E-02 | 2.80E-01 |
| CAPG      | 4.04E+02 | -8.42E-01 | 3.35E-01 | 1.19E-02 | 2.81E-01 |
| RRM2      | 1.09E+02 | 8.40E-01  | 3.34E-01 | 1.20E-02 | 2.81E-01 |
| KIAA1328  | 2.01E+02 | 6.88E-01  | 2.74E-01 | 1.20E-02 | 2.82E-01 |
| VSIG10L   | 7.22E+01 | 1.23E+00  | 4.89E-01 | 1.20E-02 | 2.82E-01 |
| CHMP4A    | 1.82E+02 | 8.05E-01  | 3.20E-01 | 1.20E-02 | 2.82E-01 |
| DTX2      | 1.43E+02 | -5.46E-01 | 2.18E-01 | 1.21E-02 | 2.82E-01 |
| KLF3      | 2.64E+03 | -8.51E-01 | 3.39E-01 | 1.21E-02 | 2.82E-01 |
| TMEM237   | 4.54E+02 | -8.13E-01 | 3.24E-01 | 1.21E-02 | 2.82E-01 |
| C9orf78   | 4.12E+02 | -3.15E-01 | 1.26E-01 | 1.23E-02 | 2.84E-01 |
| FOLR1     | 4.16E+01 | -1.35E+00 | 5.40E-01 | 1.23E-02 | 2.84E-01 |

|            |          |           |          |          |          |
|------------|----------|-----------|----------|----------|----------|
| MOCOS      | 2.57E+01 | -1.26E+00 | 5.01E-01 | 1.22E-02 | 2.84E-01 |
| SYK        | 4.07E+02 | -7.52E-01 | 3.00E-01 | 1.22E-02 | 2.84E-01 |
| CCNK       | 3.20E+02 | 7.95E-01  | 3.18E-01 | 1.23E-02 | 2.85E-01 |
| CFI        | 9.89E+02 | 9.77E-01  | 3.90E-01 | 1.23E-02 | 2.85E-01 |
| USP27X     | 2.04E+01 | 8.54E-01  | 3.41E-01 | 1.24E-02 | 2.86E-01 |
| GAS6-AS2   | 2.72E+01 | 1.33E+00  | 5.34E-01 | 1.24E-02 | 2.86E-01 |
| MFSD1      | 7.57E+02 | -4.95E-01 | 1.98E-01 | 1.24E-02 | 2.86E-01 |
| NKAPL      | 1.97E+01 | 1.36E+00  | 5.44E-01 | 1.25E-02 | 2.86E-01 |
| TGM1       | 2.34E+02 | 8.91E-01  | 3.56E-01 | 1.25E-02 | 2.86E-01 |
| SPAG1      | 5.32E+01 | -1.13E+00 | 4.51E-01 | 1.25E-02 | 2.87E-01 |
| ID4        | 1.74E+03 | -1.09E+00 | 4.36E-01 | 1.25E-02 | 2.87E-01 |
| POLR3F     | 1.64E+02 | 6.78E-01  | 2.72E-01 | 1.26E-02 | 2.87E-01 |
| AKT1       | 1.32E+03 | 6.85E-01  | 2.75E-01 | 1.27E-02 | 2.89E-01 |
| CIPC       | 3.50E+02 | 7.33E-01  | 2.94E-01 | 1.27E-02 | 2.89E-01 |
| EHD2       | 1.84E+03 | 7.44E-01  | 2.98E-01 | 1.27E-02 | 2.89E-01 |
| NQO1       | 5.86E+02 | 8.11E-01  | 3.25E-01 | 1.27E-02 | 2.89E-01 |
| TRAF3IP3   | 2.18E+01 | -1.13E+00 | 4.52E-01 | 1.27E-02 | 2.89E-01 |
| AKAP12     | 1.93E+04 | 1.15E+00  | 4.62E-01 | 1.28E-02 | 2.90E-01 |
| SEMA5A     | 6.04E+02 | 1.23E+00  | 4.93E-01 | 1.28E-02 | 2.90E-01 |
| B4GALT5    | 1.03E+03 | 7.95E-01  | 3.20E-01 | 1.29E-02 | 2.91E-01 |
| POMT2      | 1.35E+02 | 5.70E-01  | 2.29E-01 | 1.29E-02 | 2.91E-01 |
| POLE2      | 1.86E+01 | 1.12E+00  | 4.49E-01 | 1.30E-02 | 2.92E-01 |
| TBC1D20    | 7.15E+02 | 7.46E-01  | 3.00E-01 | 1.30E-02 | 2.92E-01 |
| TMTC2      | 3.41E+01 | 1.01E+00  | 4.07E-01 | 1.30E-02 | 2.92E-01 |
| ZNF706     | 3.61E+02 | -5.62E-01 | 2.26E-01 | 1.30E-02 | 2.92E-01 |
| PSMA6      | 4.44E+02 | 5.89E-01  | 2.37E-01 | 1.32E-02 | 2.95E-01 |
| ABCA2      | 1.03E+03 | -7.55E-01 | 3.05E-01 | 1.33E-02 | 2.95E-01 |
| CCSER2     | 1.09E+03 | 6.16E-01  | 2.49E-01 | 1.32E-02 | 2.95E-01 |
| CNKSR2     | 1.93E+01 | 1.35E+00  | 5.44E-01 | 1.33E-02 | 2.95E-01 |
| LOC613037  | 1.50E+01 | 9.98E-01  | 4.03E-01 | 1.32E-02 | 2.95E-01 |
| MTERFD1    | 1.26E+02 | -6.45E-01 | 2.60E-01 | 1.33E-02 | 2.95E-01 |
| PARP3      | 2.47E+02 | -1.01E+00 | 4.06E-01 | 1.33E-02 | 2.95E-01 |
| SRGAP1     | 6.31E+02 | 1.02E+00  | 4.11E-01 | 1.33E-02 | 2.95E-01 |
| UGCG       | 2.59E+02 | 9.18E-01  | 3.71E-01 | 1.32E-02 | 2.95E-01 |
| ZNF410     | 2.93E+02 | 6.37E-01  | 2.58E-01 | 1.34E-02 | 2.96E-01 |
| ANO1       | 4.72E+01 | 1.18E+00  | 4.78E-01 | 1.34E-02 | 2.96E-01 |
| MNAT1      | 2.28E+02 | 7.97E-01  | 3.22E-01 | 1.35E-02 | 2.96E-01 |
| SLC39A3    | 1.77E+02 | -7.23E-01 | 2.92E-01 | 1.34E-02 | 2.96E-01 |
| STRN3      | 4.82E+02 | 8.07E-01  | 3.26E-01 | 1.34E-02 | 2.96E-01 |
| APCDD1L-AS | 4.12E+00 | 1.24E+00  | 5.03E-01 | 1.35E-02 | 2.96E-01 |
| ENDOU      | 1.59E+01 | 1.22E+00  | 4.96E-01 | 1.36E-02 | 2.98E-01 |
| FBF1       | 2.24E+02 | -4.91E-01 | 1.99E-01 | 1.36E-02 | 2.98E-01 |
| SIAH3      | 3.77E+00 | 1.34E+00  | 5.45E-01 | 1.36E-02 | 2.98E-01 |
| FFAR4      | 9.52E+00 | -1.29E+00 | 5.23E-01 | 1.36E-02 | 2.98E-01 |
| ACO2       | 1.20E+03 | -7.59E-01 | 3.08E-01 | 1.37E-02 | 2.99E-01 |
| ADAMTS17   | 7.32E+02 | 1.15E+00  | 4.67E-01 | 1.37E-02 | 2.99E-01 |
| SVIL       | 1.82E+03 | 1.15E+00  | 4.68E-01 | 1.37E-02 | 2.99E-01 |
| THAP2      | 4.96E+01 | -6.60E-01 | 2.68E-01 | 1.37E-02 | 2.99E-01 |
| CDK2       | 3.69E+02 | -4.34E-01 | 1.76E-01 | 1.38E-02 | 2.99E-01 |
| ZC3H12C    | 5.80E+02 | 5.04E-01  | 2.05E-01 | 1.38E-02 | 2.99E-01 |
| SLC38A10   | 1.38E+03 | -5.37E-01 | 2.18E-01 | 1.38E-02 | 2.99E-01 |
| CTGLF12P   | 2.27E+01 | -1.27E+00 | 5.15E-01 | 1.39E-02 | 3.00E-01 |
| ABCC1      | 3.07E+02 | 1.14E+00  | 4.63E-01 | 1.40E-02 | 3.00E-01 |

|            |          |           |          |          |          |
|------------|----------|-----------|----------|----------|----------|
| ABI3BP     | 2.23E+03 | -1.24E+00 | 5.06E-01 | 1.41E-02 | 3.00E-01 |
| FAM179A    | 2.99E+01 | -1.16E+00 | 4.71E-01 | 1.40E-02 | 3.00E-01 |
| FAM84A     | 9.46E+01 | 1.23E+00  | 5.02E-01 | 1.41E-02 | 3.00E-01 |
| JAKMIP3    | 4.76E+01 | 1.05E+00  | 4.29E-01 | 1.39E-02 | 3.00E-01 |
| LAMA3      | 6.82E+01 | 1.29E+00  | 5.25E-01 | 1.40E-02 | 3.00E-01 |
| MMP15      | 2.03E+02 | 1.01E+00  | 4.09E-01 | 1.40E-02 | 3.00E-01 |
| OGDH       | 2.32E+03 | -7.28E-01 | 2.96E-01 | 1.40E-02 | 3.00E-01 |
| WDR89      | 1.08E+02 | 6.26E-01  | 2.55E-01 | 1.40E-02 | 3.00E-01 |
| ZNF534     | 7.39E+00 | 1.33E+00  | 5.41E-01 | 1.41E-02 | 3.00E-01 |
| ZNF771     | 3.68E+01 | -9.07E-01 | 3.69E-01 | 1.41E-02 | 3.00E-01 |
| CCDC77     | 7.63E+01 | 8.02E-01  | 3.27E-01 | 1.41E-02 | 3.01E-01 |
| HYAL1      | 8.82E+01 | -1.32E+00 | 5.37E-01 | 1.42E-02 | 3.01E-01 |
| ZSCAN12P1  | 4.50E+01 | -1.32E+00 | 5.37E-01 | 1.42E-02 | 3.01E-01 |
| CA13       | 4.41E+01 | -1.24E+00 | 5.07E-01 | 1.42E-02 | 3.02E-01 |
| FOXD3      | 3.55E+01 | -1.29E+00 | 5.25E-01 | 1.43E-02 | 3.02E-01 |
| PRRT2      | 1.00E+02 | -1.01E+00 | 4.14E-01 | 1.43E-02 | 3.02E-01 |
| MCU        | 4.26E+02 | 9.93E-01  | 4.06E-01 | 1.44E-02 | 3.03E-01 |
| PLTP       | 2.56E+03 | 1.05E+00  | 4.28E-01 | 1.44E-02 | 3.03E-01 |
| TPH1       | 1.20E+01 | 1.23E+00  | 5.01E-01 | 1.44E-02 | 3.03E-01 |
| CAV2       | 8.02E+02 | -1.09E+00 | 4.48E-01 | 1.45E-02 | 3.04E-01 |
| CSTF1      | 3.61E+02 | 5.52E-01  | 2.26E-01 | 1.45E-02 | 3.04E-01 |
| ZFYVE26    | 8.76E+02 | 6.29E-01  | 2.57E-01 | 1.45E-02 | 3.04E-01 |
| FAM46B     | 4.19E+00 | 1.33E+00  | 5.43E-01 | 1.45E-02 | 3.04E-01 |
| MASTL      | 1.53E+02 | 5.75E-01  | 2.36E-01 | 1.46E-02 | 3.05E-01 |
| RNF31      | 5.31E+02 | 5.86E-01  | 2.40E-01 | 1.46E-02 | 3.05E-01 |
| ZC3H18     | 4.58E+02 | -3.42E-01 | 1.40E-01 | 1.46E-02 | 3.05E-01 |
| IFIT5      | 3.64E+02 | 5.74E-01  | 2.35E-01 | 1.47E-02 | 3.05E-01 |
| MYL3       | 6.19E+00 | -1.31E+00 | 5.36E-01 | 1.47E-02 | 3.05E-01 |
| PSEN1      | 8.92E+02 | 7.01E-01  | 2.88E-01 | 1.48E-02 | 3.07E-01 |
| AXL        | 9.66E+02 | -9.21E-01 | 3.78E-01 | 1.48E-02 | 3.07E-01 |
| SEMA3A     | 1.58E+01 | 1.32E+00  | 5.43E-01 | 1.49E-02 | 3.07E-01 |
| SH2D4A     | 6.86E+01 | -1.18E+00 | 4.86E-01 | 1.48E-02 | 3.07E-01 |
| TMTC1      | 4.82E+03 | 9.34E-01  | 3.84E-01 | 1.49E-02 | 3.07E-01 |
| ZBED5-AS1  | 5.11E+01 | -9.29E-01 | 3.81E-01 | 1.49E-02 | 3.07E-01 |
| ETNK1      | 1.20E+03 | -5.72E-01 | 2.35E-01 | 1.49E-02 | 3.07E-01 |
| TRAF3      | 5.01E+02 | 5.51E-01  | 2.26E-01 | 1.49E-02 | 3.08E-01 |
| DLG5       | 9.98E+02 | 6.30E-01  | 2.59E-01 | 1.50E-02 | 3.08E-01 |
| KLF7       | 8.22E+02 | 5.64E-01  | 2.32E-01 | 1.50E-02 | 3.08E-01 |
| PHGDH      | 1.23E+02 | 9.74E-01  | 4.01E-01 | 1.51E-02 | 3.09E-01 |
| CDH6       | 1.55E+02 | 1.21E+00  | 5.00E-01 | 1.52E-02 | 3.09E-01 |
| INHBA      | 1.62E+01 | 1.20E+00  | 4.92E-01 | 1.52E-02 | 3.09E-01 |
| LMF1       | 2.70E+02 | -6.65E-01 | 2.74E-01 | 1.52E-02 | 3.09E-01 |
| LOC1019269 | 1.17E+02 | 1.00E+00  | 4.12E-01 | 1.51E-02 | 3.09E-01 |
| SLC9A8     | 4.20E+02 | 6.10E-01  | 2.51E-01 | 1.52E-02 | 3.09E-01 |
| SLCO1A2    | 7.21E+00 | -1.31E+00 | 5.39E-01 | 1.51E-02 | 3.09E-01 |
| TRABD2B    | 5.52E+02 | -9.43E-01 | 3.88E-01 | 1.52E-02 | 3.09E-01 |
| GALNT3     | 7.88E+01 | -1.32E+00 | 5.45E-01 | 1.54E-02 | 3.12E-01 |
| LYPD6B     | 8.81E+01 | -1.29E+00 | 5.34E-01 | 1.54E-02 | 3.13E-01 |
| ATP8B5P    | 6.03E+00 | 1.12E+00  | 4.64E-01 | 1.55E-02 | 3.13E-01 |
| GPR65      | 5.84E+01 | -1.18E+00 | 4.89E-01 | 1.56E-02 | 3.13E-01 |
| HBA1       | 1.24E+02 | 1.29E+00  | 5.32E-01 | 1.55E-02 | 3.13E-01 |
| PAM        | 2.89E+03 | 6.84E-01  | 2.83E-01 | 1.56E-02 | 3.13E-01 |
| PTPN1      | 7.55E+02 | 6.73E-01  | 2.78E-01 | 1.55E-02 | 3.13E-01 |

|            |          |           |          |          |          |
|------------|----------|-----------|----------|----------|----------|
| SLC25A32   | 2.61E+02 | -5.07E-01 | 2.10E-01 | 1.56E-02 | 3.13E-01 |
| SMG1P7     | 2.72E+01 | -1.11E+00 | 4.57E-01 | 1.56E-02 | 3.13E-01 |
| GADD45A    | 1.02E+02 | 1.12E+00  | 4.62E-01 | 1.57E-02 | 3.14E-01 |
| FKBP9      | 2.21E+03 | -5.74E-01 | 2.38E-01 | 1.57E-02 | 3.15E-01 |
| GPATCH2L   | 1.00E+03 | 5.62E-01  | 2.33E-01 | 1.57E-02 | 3.15E-01 |
| SLC39A9    | 1.38E+03 | 6.20E-01  | 2.57E-01 | 1.58E-02 | 3.15E-01 |
| EXD2       | 2.70E+02 | 6.86E-01  | 2.84E-01 | 1.58E-02 | 3.15E-01 |
| GNLY       | 6.31E+00 | 1.27E+00  | 5.28E-01 | 1.58E-02 | 3.16E-01 |
| GGT5       | 1.60E+02 | 1.19E+00  | 4.92E-01 | 1.59E-02 | 3.16E-01 |
| RNF115     | 4.11E+02 | 4.92E-01  | 2.04E-01 | 1.59E-02 | 3.17E-01 |
| ARHGEF17   | 1.99E+03 | 8.91E-01  | 3.70E-01 | 1.61E-02 | 3.17E-01 |
| COQ9       | 5.87E+02 | -8.79E-01 | 3.65E-01 | 1.61E-02 | 3.17E-01 |
| EFEMP1     | 6.54E+03 | -1.07E+00 | 4.44E-01 | 1.60E-02 | 3.17E-01 |
| KLF3-AS1   | 1.94E+02 | -7.34E-01 | 3.05E-01 | 1.61E-02 | 3.17E-01 |
| MKL2       | 2.08E+03 | 9.68E-01  | 4.02E-01 | 1.61E-02 | 3.17E-01 |
| PNPO       | 5.33E+02 | -5.74E-01 | 2.38E-01 | 1.60E-02 | 3.17E-01 |
| SYNGR3     | 2.78E+01 | -1.28E+00 | 5.31E-01 | 1.60E-02 | 3.17E-01 |
| IL17RA     | 6.35E+02 | -8.71E-01 | 3.62E-01 | 1.61E-02 | 3.17E-01 |
| IQUB       | 2.77E+01 | -1.11E+00 | 4.60E-01 | 1.61E-02 | 3.17E-01 |
| DOCK9      | 1.63E+03 | 1.01E+00  | 4.22E-01 | 1.62E-02 | 3.18E-01 |
| ERCC1      | 7.47E+02 | -5.41E-01 | 2.25E-01 | 1.62E-02 | 3.18E-01 |
| PRKCH      | 5.68E+02 | 6.71E-01  | 2.79E-01 | 1.62E-02 | 3.18E-01 |
| DNAL1      | 3.14E+02 | 8.18E-01  | 3.40E-01 | 1.62E-02 | 3.18E-01 |
| PLEKHO1    | 2.25E+02 | -6.97E-01 | 2.90E-01 | 1.63E-02 | 3.18E-01 |
| PTDSS1     | 8.19E+02 | -6.33E-01 | 2.64E-01 | 1.63E-02 | 3.18E-01 |
| DLEU7      | 4.58E+00 | -1.28E+00 | 5.32E-01 | 1.64E-02 | 3.18E-01 |
| EVI2A      | 1.13E+02 | -1.09E+00 | 4.54E-01 | 1.64E-02 | 3.18E-01 |
| KLRD1      | 4.21E+01 | -1.28E+00 | 5.33E-01 | 1.64E-02 | 3.18E-01 |
| MYCBP2     | 3.37E+03 | 4.50E-01  | 1.88E-01 | 1.64E-02 | 3.18E-01 |
| SLC6A17    | 1.28E+01 | -1.31E+00 | 5.45E-01 | 1.64E-02 | 3.18E-01 |
| TOX4       | 8.91E+02 | 6.19E-01  | 2.58E-01 | 1.64E-02 | 3.18E-01 |
| YY1        | 6.88E+02 | 5.13E-01  | 2.14E-01 | 1.65E-02 | 3.19E-01 |
| S100A14    | 8.73E+00 | 1.30E+00  | 5.41E-01 | 1.65E-02 | 3.19E-01 |
| ARX        | 1.40E+01 | -1.28E+00 | 5.36E-01 | 1.66E-02 | 3.19E-01 |
| IFI27L2    | 8.23E+01 | 9.99E-01  | 4.17E-01 | 1.66E-02 | 3.19E-01 |
| LOC1019275 | 2.82E+01 | -1.30E+00 | 5.43E-01 | 1.66E-02 | 3.20E-01 |
| CABLES1    | 1.22E+02 | 1.15E+00  | 4.81E-01 | 1.66E-02 | 3.20E-01 |
| CD84       | 4.65E+02 | -9.76E-01 | 4.08E-01 | 1.67E-02 | 3.21E-01 |
| SUMO3      | 8.36E+02 | 4.66E-01  | 1.95E-01 | 1.67E-02 | 3.21E-01 |
| SEZ6L2     | 5.06E+02 | -1.15E+00 | 4.82E-01 | 1.67E-02 | 3.21E-01 |
| SETD3      | 7.62E+02 | 7.62E-01  | 3.19E-01 | 1.68E-02 | 3.23E-01 |
| ITPRIP     | 4.19E+02 | 9.81E-01  | 4.11E-01 | 1.69E-02 | 3.24E-01 |
| OTUB2      | 8.47E+00 | 1.10E+00  | 4.61E-01 | 1.70E-02 | 3.25E-01 |
| SYT6       | 1.71E+01 | -1.22E+00 | 5.13E-01 | 1.70E-02 | 3.25E-01 |
| AGFG2      | 4.32E+02 | 6.71E-01  | 2.81E-01 | 1.71E-02 | 3.25E-01 |
| NAV3       | 5.63E+01 | -1.27E+00 | 5.33E-01 | 1.71E-02 | 3.25E-01 |
| CASP6      | 7.85E+01 | 7.58E-01  | 3.18E-01 | 1.71E-02 | 3.26E-01 |
| LINC00176  | 4.87E+01 | 1.05E+00  | 4.39E-01 | 1.72E-02 | 3.26E-01 |
| SDCBP      | 3.32E+03 | -6.92E-01 | 2.90E-01 | 1.72E-02 | 3.26E-01 |
| FASTKD1    | 2.44E+02 | -7.47E-01 | 3.14E-01 | 1.73E-02 | 3.27E-01 |
| KCNB1      | 2.14E+02 | 1.18E+00  | 4.96E-01 | 1.73E-02 | 3.28E-01 |
| RFC3       | 1.15E+02 | 7.23E-01  | 3.04E-01 | 1.73E-02 | 3.28E-01 |
| CDH3       | 2.92E+02 | -1.05E+00 | 4.43E-01 | 1.74E-02 | 3.28E-01 |



|           |          |           |          |          |          |
|-----------|----------|-----------|----------|----------|----------|
| HCG27     | 6.55E+00 | -1.27E+00 | 5.32E-01 | 1.74E-02 | 3.28E-01 |
| PLCG1     | 2.20E+03 | 6.13E-01  | 2.58E-01 | 1.74E-02 | 3.28E-01 |
| STAG3L5P  | 2.89E+01 | 7.88E-01  | 3.31E-01 | 1.74E-02 | 3.28E-01 |
| FAM65A    | 6.88E+02 | -4.21E-01 | 1.77E-01 | 1.75E-02 | 3.29E-01 |
| TMOD3     | 3.69E+03 | 8.01E-01  | 3.38E-01 | 1.77E-02 | 3.32E-01 |
| ELOVL2    | 2.34E+02 | -1.10E+00 | 4.65E-01 | 1.78E-02 | 3.33E-01 |
| RAB14     | 1.59E+03 | -3.61E-01 | 1.53E-01 | 1.79E-02 | 3.35E-01 |
| SLC7A5    | 2.48E+02 | -1.09E+00 | 4.61E-01 | 1.79E-02 | 3.35E-01 |
| SLC44A3   | 4.30E+01 | -1.21E+00 | 5.11E-01 | 1.80E-02 | 3.35E-01 |
| C14orf169 | 1.61E+02 | 7.34E-01  | 3.10E-01 | 1.81E-02 | 3.37E-01 |
| SPATA18   | 1.03E+02 | -1.28E+00 | 5.40E-01 | 1.81E-02 | 3.37E-01 |
| CSDC2     | 1.07E+02 | 1.02E+00  | 4.31E-01 | 1.83E-02 | 3.38E-01 |
| DGCR5     | 7.68E+01 | -9.38E-01 | 3.97E-01 | 1.82E-02 | 3.38E-01 |
| ERH       | 5.56E+02 | 6.46E-01  | 2.73E-01 | 1.82E-02 | 3.38E-01 |
| FAM92A1   | 1.95E+02 | -6.84E-01 | 2.90E-01 | 1.83E-02 | 3.38E-01 |
| MICU2     | 5.73E+02 | 4.75E-01  | 2.01E-01 | 1.82E-02 | 3.38E-01 |
| MIS18BP1  | 4.33E+02 | 4.86E-01  | 2.06E-01 | 1.82E-02 | 3.38E-01 |
| PSMB10    | 1.59E+02 | -6.56E-01 | 2.78E-01 | 1.82E-02 | 3.38E-01 |
| RTN1      | 8.47E+01 | -9.95E-01 | 4.22E-01 | 1.83E-02 | 3.38E-01 |
| ATAD5     | 1.12E+02 | 6.26E-01  | 2.65E-01 | 1.83E-02 | 3.38E-01 |
| APBB1IP   | 1.78E+02 | -1.02E+00 | 4.35E-01 | 1.85E-02 | 3.40E-01 |
| NGDN      | 1.49E+02 | 7.33E-01  | 3.11E-01 | 1.85E-02 | 3.40E-01 |
| SLC35E3   | 1.61E+02 | 6.37E-01  | 2.71E-01 | 1.85E-02 | 3.40E-01 |
| GENE      | 4.87E+02 | -5.63E-01 | 2.39E-01 | 1.86E-02 | 3.40E-01 |
| PTH1R     | 4.90E+01 | -1.12E+00 | 4.75E-01 | 1.86E-02 | 3.40E-01 |
| RBM20     | 2.26E+01 | 1.26E+00  | 5.34E-01 | 1.85E-02 | 3.40E-01 |
| COMMD10   | 1.38E+02 | 6.09E-01  | 2.59E-01 | 1.87E-02 | 3.41E-01 |
| SCNN1A    | 2.80E+02 | 1.12E+00  | 4.75E-01 | 1.87E-02 | 3.41E-01 |
| ZNF268    | 4.23E+02 | 6.27E-01  | 2.67E-01 | 1.87E-02 | 3.41E-01 |
| MDGA1     | 4.06E+02 | 9.64E-01  | 4.10E-01 | 1.87E-02 | 3.41E-01 |
| SCIN      | 9.87E+01 | -1.20E+00 | 5.11E-01 | 1.88E-02 | 3.41E-01 |
| SNTB1     | 1.17E+02 | 1.21E+00  | 5.16E-01 | 1.88E-02 | 3.41E-01 |
| CRYAB     | 4.27E+02 | -8.86E-01 | 3.77E-01 | 1.88E-02 | 3.41E-01 |
| LHX4      | 4.86E+00 | 1.26E+00  | 5.35E-01 | 1.89E-02 | 3.43E-01 |
| TTC39B    | 2.72E+02 | -5.74E-01 | 2.45E-01 | 1.90E-02 | 3.44E-01 |
| COL4A1    | 2.90E+03 | 1.13E+00  | 4.83E-01 | 1.90E-02 | 3.45E-01 |
| CRISPLD2  | 8.56E+01 | 1.27E+00  | 5.43E-01 | 1.91E-02 | 3.45E-01 |
| BCKDHB    | 3.51E+02 | -5.66E-01 | 2.42E-01 | 1.94E-02 | 3.45E-01 |
| CAMKK1    | 7.74E+01 | 1.12E+00  | 4.79E-01 | 1.93E-02 | 3.45E-01 |
| ITCH      | 1.32E+03 | 5.03E-01  | 2.15E-01 | 1.92E-02 | 3.45E-01 |
| LINC00087 | 4.60E+01 | 1.11E+00  | 4.74E-01 | 1.94E-02 | 3.45E-01 |
| LINC01132 | 6.66E+00 | 1.16E+00  | 4.94E-01 | 1.92E-02 | 3.45E-01 |
| MED29     | 8.62E+02 | 3.87E-01  | 1.66E-01 | 1.93E-02 | 3.45E-01 |
| OR5111    | 1.38E+01 | 1.16E+00  | 4.96E-01 | 1.94E-02 | 3.45E-01 |
| PDLIM1    | 4.06E+02 | 1.20E+00  | 5.12E-01 | 1.92E-02 | 3.45E-01 |
| PROS1     | 1.95E+03 | -9.08E-01 | 3.88E-01 | 1.92E-02 | 3.45E-01 |
| RARRES1   | 5.25E+00 | 1.27E+00  | 5.42E-01 | 1.93E-02 | 3.45E-01 |
| SNHG17    | 9.21E+01 | -6.22E-01 | 2.66E-01 | 1.93E-02 | 3.45E-01 |
| SURF6     | 3.51E+02 | -3.99E-01 | 1.70E-01 | 1.91E-02 | 3.45E-01 |
| TAX1BP3   | 8.64E+01 | 6.35E-01  | 2.72E-01 | 1.94E-02 | 3.45E-01 |
| ZDHHHC20  | 7.06E+02 | 4.64E-01  | 1.98E-01 | 1.93E-02 | 3.45E-01 |
| QPRT      | 2.25E+02 | -1.08E+00 | 4.64E-01 | 1.96E-02 | 3.48E-01 |
| UCN       | 5.78E+00 | -1.25E+00 | 5.37E-01 | 1.96E-02 | 3.48E-01 |

|            |          |           |          |          |          |
|------------|----------|-----------|----------|----------|----------|
| WDR19      | 5.43E+02 | -7.84E-01 | 3.36E-01 | 1.96E-02 | 3.48E-01 |
| GPAM       | 2.36E+02 | 6.61E-01  | 2.83E-01 | 1.97E-02 | 3.49E-01 |
| KLC1       | 1.15E+03 | 6.55E-01  | 2.81E-01 | 1.97E-02 | 3.49E-01 |
| WDR37      | 4.02E+02 | 5.20E-01  | 2.23E-01 | 1.97E-02 | 3.49E-01 |
| BAALC      | 1.22E+02 | -1.27E+00 | 5.43E-01 | 1.98E-02 | 3.49E-01 |
| ATP6V1E2   | 1.00E+01 | -1.15E+00 | 4.94E-01 | 1.99E-02 | 3.51E-01 |
| CXCL12     | 8.22E+02 | 1.23E+00  | 5.30E-01 | 2.01E-02 | 3.52E-01 |
| IFI27L1    | 2.78E+01 | 8.83E-01  | 3.80E-01 | 2.01E-02 | 3.52E-01 |
| LOC1019270 | 4.52E+01 | 7.55E-01  | 3.25E-01 | 2.01E-02 | 3.52E-01 |
| NRG4       | 4.42E+01 | -1.21E+00 | 5.22E-01 | 2.01E-02 | 3.52E-01 |
| PDZRN4     | 1.03E+01 | -1.23E+00 | 5.30E-01 | 2.00E-02 | 3.52E-01 |
| RBM3       | 1.81E+03 | 4.77E-01  | 2.05E-01 | 2.01E-02 | 3.52E-01 |
| SUPT16H    | 1.29E+03 | 6.31E-01  | 2.72E-01 | 2.02E-02 | 3.52E-01 |
| TBCK       | 7.36E+02 | -5.28E-01 | 2.27E-01 | 2.00E-02 | 3.52E-01 |
| TRIM6      | 1.85E+02 | 9.74E-01  | 4.19E-01 | 2.01E-02 | 3.52E-01 |
| SLC19A2    | 2.49E+02 | -8.55E-01 | 3.68E-01 | 2.02E-02 | 3.52E-01 |
| NFATC2     | 2.37E+02 | -7.62E-01 | 3.28E-01 | 2.02E-02 | 3.52E-01 |
| ZNF358     | 4.29E+02 | -5.97E-01 | 2.57E-01 | 2.02E-02 | 3.52E-01 |
| C10orf111  | 3.34E+00 | 1.26E+00  | 5.42E-01 | 2.03E-02 | 3.53E-01 |
| STXBP5L    | 8.79E+00 | -1.25E+00 | 5.39E-01 | 2.03E-02 | 3.53E-01 |
| ATL1       | 2.99E+02 | 8.61E-01  | 3.71E-01 | 2.05E-02 | 3.54E-01 |
| C9orf106   | 1.68E+01 | 1.01E+00  | 4.36E-01 | 2.04E-02 | 3.54E-01 |
| ESR2       | 2.93E+01 | -1.20E+00 | 5.19E-01 | 2.05E-02 | 3.54E-01 |
| C15orf37   | 8.15E+00 | -1.06E+00 | 4.58E-01 | 2.05E-02 | 3.55E-01 |
| PCNA       | 4.95E+02 | 6.24E-01  | 2.70E-01 | 2.06E-02 | 3.56E-01 |
| NDUFA8     | 2.67E+02 | -6.67E-01 | 2.88E-01 | 2.07E-02 | 3.57E-01 |
| HLA-DRB5   | 1.43E+02 | -1.24E+00 | 5.36E-01 | 2.07E-02 | 3.57E-01 |
| NXN        | 6.84E+02 | 9.03E-01  | 3.90E-01 | 2.07E-02 | 3.57E-01 |
| PRKG1      | 2.18E+02 | -1.03E+00 | 4.44E-01 | 2.07E-02 | 3.57E-01 |
| TLR5       | 8.23E+01 | -1.01E+00 | 4.38E-01 | 2.09E-02 | 3.59E-01 |
| HBA2       | 3.34E+02 | 1.23E+00  | 5.31E-01 | 2.09E-02 | 3.59E-01 |
| RASA1      | 9.34E+02 | 4.15E-01  | 1.80E-01 | 2.09E-02 | 3.59E-01 |
| C16orf58   | 8.52E+02 | -5.36E-01 | 2.32E-01 | 2.10E-02 | 3.59E-01 |
| CHTF8      | 6.40E+02 | -4.37E-01 | 1.89E-01 | 2.10E-02 | 3.59E-01 |
| MPP6       | 6.24E+02 | 9.54E-01  | 4.14E-01 | 2.10E-02 | 3.59E-01 |
| OLFML2B    | 2.16E+03 | -9.10E-01 | 3.94E-01 | 2.10E-02 | 3.59E-01 |
| AMER2      | 1.70E+01 | -1.24E+00 | 5.36E-01 | 2.11E-02 | 3.59E-01 |
| LOC1002681 | 5.72E+00 | 1.16E+00  | 5.04E-01 | 2.11E-02 | 3.59E-01 |
| SBF2       | 1.41E+03 | 4.90E-01  | 2.12E-01 | 2.11E-02 | 3.59E-01 |
| TMED8      | 6.75E+01 | 6.81E-01  | 2.95E-01 | 2.11E-02 | 3.59E-01 |
| C15orf52   | 5.67E+02 | 7.84E-01  | 3.41E-01 | 2.12E-02 | 3.60E-01 |
| CD59       | 5.64E+03 | 7.51E-01  | 3.26E-01 | 2.12E-02 | 3.60E-01 |
| MAP3K10    | 1.07E+02 | 5.21E-01  | 2.26E-01 | 2.13E-02 | 3.60E-01 |
| MYD88      | 3.62E+02 | -5.46E-01 | 2.37E-01 | 2.13E-02 | 3.60E-01 |
| MYOF       | 1.48E+03 | 6.97E-01  | 3.02E-01 | 2.12E-02 | 3.60E-01 |
| CAMK2D     | 1.44E+03 | 9.80E-01  | 4.28E-01 | 2.20E-02 | 3.62E-01 |
| CEP55      | 4.26E+01 | 8.58E-01  | 3.74E-01 | 2.19E-02 | 3.62E-01 |
| CISH       | 3.20E+01 | -9.12E-01 | 3.97E-01 | 2.15E-02 | 3.62E-01 |
| DLG3       | 4.74E+02 | 8.92E-01  | 3.88E-01 | 2.17E-02 | 3.62E-01 |
| DYNLRB1    | 8.60E+02 | 6.91E-01  | 3.01E-01 | 2.18E-02 | 3.62E-01 |
| ELL3       | 2.37E+01 | 1.00E+00  | 4.37E-01 | 2.16E-02 | 3.62E-01 |
| EMILIN1    | 6.18E+02 | -1.03E+00 | 4.48E-01 | 2.18E-02 | 3.62E-01 |
| FAM81A     | 2.06E+01 | -1.07E+00 | 4.68E-01 | 2.18E-02 | 3.62E-01 |

|            |          |           |          |          |          |
|------------|----------|-----------|----------|----------|----------|
| FBXO46     | 1.81E+02 | 4.32E-01  | 1.89E-01 | 2.18E-02 | 3.62E-01 |
| ISM1       | 6.27E+01 | 1.08E+00  | 4.70E-01 | 2.17E-02 | 3.62E-01 |
| KIAA1683   | 2.05E+02 | 1.17E+00  | 5.08E-01 | 2.15E-02 | 3.62E-01 |
| LINC01272  | 4.04E+00 | 1.22E+00  | 5.32E-01 | 2.19E-02 | 3.62E-01 |
| MOAP1      | 2.96E+02 | 7.39E-01  | 3.22E-01 | 2.19E-02 | 3.62E-01 |
| NMNAT2     | 4.25E+03 | -9.72E-01 | 4.24E-01 | 2.18E-02 | 3.62E-01 |
| PSD4       | 6.23E+02 | -6.02E-01 | 2.62E-01 | 2.15E-02 | 3.62E-01 |
| PTAFR      | 1.79E+02 | -1.06E+00 | 4.63E-01 | 2.17E-02 | 3.62E-01 |
| PTGER3     | 5.78E+00 | 1.23E+00  | 5.37E-01 | 2.20E-02 | 3.62E-01 |
| RGS20      | 7.34E+00 | -1.23E+00 | 5.38E-01 | 2.18E-02 | 3.62E-01 |
| RIMKLA     | 2.77E+01 | 1.22E+00  | 5.29E-01 | 2.16E-02 | 3.62E-01 |
| SLC25A12   | 5.19E+02 | -7.59E-01 | 3.30E-01 | 2.14E-02 | 3.62E-01 |
| SSBP3      | 5.51E+02 | 7.90E-01  | 3.44E-01 | 2.15E-02 | 3.62E-01 |
| SYTL4      | 8.24E+01 | 1.20E+00  | 5.23E-01 | 2.16E-02 | 3.62E-01 |
| TPGS2      | 4.64E+02 | 6.40E-01  | 2.79E-01 | 2.19E-02 | 3.62E-01 |
| YLPM1      | 1.60E+03 | 6.28E-01  | 2.73E-01 | 2.16E-02 | 3.62E-01 |
| ZFX        | 1.56E+03 | 6.32E-01  | 2.76E-01 | 2.18E-02 | 3.62E-01 |
| ZNF429     | 1.86E+02 | 6.71E-01  | 2.92E-01 | 2.17E-02 | 3.62E-01 |
| GALNT5     | 2.94E+01 | -1.23E+00 | 5.38E-01 | 2.20E-02 | 3.62E-01 |
| SNX25      | 9.45E+02 | 8.55E-01  | 3.74E-01 | 2.20E-02 | 3.62E-01 |
| CXCL2      | 7.46E+00 | -1.25E+00 | 5.44E-01 | 2.21E-02 | 3.62E-01 |
| INPP5A     | 2.43E+02 | 7.95E-01  | 3.47E-01 | 2.21E-02 | 3.62E-01 |
| WHAMMP2    | 8.88E+01 | 7.38E-01  | 3.22E-01 | 2.21E-02 | 3.62E-01 |
| G6PD       | 7.84E+02 | 9.35E-01  | 4.09E-01 | 2.22E-02 | 3.62E-01 |
| PAR6B      | 1.24E+02 | 1.13E+00  | 4.92E-01 | 2.22E-02 | 3.62E-01 |
| PYROXD1    | 2.54E+02 | 6.48E-01  | 2.83E-01 | 2.22E-02 | 3.62E-01 |
| PHLDB2     | 5.91E+03 | -8.42E-01 | 3.68E-01 | 2.22E-02 | 3.62E-01 |
| ATP6V1D    | 4.05E+02 | 5.88E-01  | 2.57E-01 | 2.23E-02 | 3.62E-01 |
| CHST1      | 3.33E+01 | 1.00E+00  | 4.39E-01 | 2.23E-02 | 3.62E-01 |
| CMTM8      | 3.36E+01 | 9.85E-01  | 4.31E-01 | 2.23E-02 | 3.62E-01 |
| CYP3A4     | 3.01E+00 | -1.23E+00 | 5.37E-01 | 2.23E-02 | 3.62E-01 |
| ACD        | 1.25E+02 | -6.58E-01 | 2.89E-01 | 2.26E-02 | 3.63E-01 |
| AKAP5      | 1.20E+01 | 1.05E+00  | 4.61E-01 | 2.28E-02 | 3.63E-01 |
| BAG1       | 5.94E+02 | -8.47E-01 | 3.72E-01 | 2.26E-02 | 3.63E-01 |
| C3orf18    | 1.70E+02 | -9.21E-01 | 4.05E-01 | 2.28E-02 | 3.63E-01 |
| CCND1      | 1.94E+04 | 8.47E-01  | 3.71E-01 | 2.24E-02 | 3.63E-01 |
| CD209      | 4.27E+01 | 1.24E+00  | 5.45E-01 | 2.28E-02 | 3.63E-01 |
| CLEC10A    | 8.05E+00 | -1.24E+00 | 5.45E-01 | 2.26E-02 | 3.63E-01 |
| CRMP1      | 1.45E+02 | -1.11E+00 | 4.86E-01 | 2.28E-02 | 3.63E-01 |
| FAM118A    | 2.73E+02 | -1.09E+00 | 4.78E-01 | 2.25E-02 | 3.63E-01 |
| HSPA12A    | 1.50E+02 | 1.08E+00  | 4.75E-01 | 2.26E-02 | 3.63E-01 |
| IPO5P1     | 2.79E+02 | 5.34E-01  | 2.35E-01 | 2.28E-02 | 3.63E-01 |
| IRF8       | 1.33E+02 | -9.95E-01 | 4.37E-01 | 2.29E-02 | 3.63E-01 |
| JAG1       | 4.37E+03 | 9.34E-01  | 4.09E-01 | 2.24E-02 | 3.63E-01 |
| LOC1019297 | 9.34E+00 | -1.08E+00 | 4.73E-01 | 2.28E-02 | 3.63E-01 |
| MTMR12     | 9.40E+02 | 4.21E-01  | 1.84E-01 | 2.26E-02 | 3.63E-01 |
| NOG        | 4.15E+00 | 1.19E+00  | 5.22E-01 | 2.26E-02 | 3.63E-01 |
| NRG1       | 6.45E+01 | -1.24E+00 | 5.44E-01 | 2.26E-02 | 3.63E-01 |
| PIGH       | 1.44E+02 | 6.70E-01  | 2.94E-01 | 2.27E-02 | 3.63E-01 |
| PREB       | 3.51E+02 | -5.71E-01 | 2.51E-01 | 2.29E-02 | 3.63E-01 |
| RMI2       | 2.54E+01 | 8.52E-01  | 3.74E-01 | 2.28E-02 | 3.63E-01 |
| SCRN2      | 2.28E+02 | -5.40E-01 | 2.38E-01 | 2.29E-02 | 3.63E-01 |
| USH2A      | 3.22E+01 | -1.24E+00 | 5.45E-01 | 2.26E-02 | 3.63E-01 |

|            |          |           |          |          |          |
|------------|----------|-----------|----------|----------|----------|
| ZNF287     | 1.42E+02 | 4.77E-01  | 2.10E-01 | 2.28E-02 | 3.63E-01 |
| ZNF493     | 9.98E+02 | 7.78E-01  | 3.41E-01 | 2.27E-02 | 3.63E-01 |
| ZNF629     | 7.58E+02 | -3.70E-01 | 1.62E-01 | 2.24E-02 | 3.63E-01 |
| LOC1005061 | 7.91E+00 | -1.23E+00 | 5.39E-01 | 2.30E-02 | 3.64E-01 |
| EXOSC6     | 2.25E+02 | -4.95E-01 | 2.18E-01 | 2.30E-02 | 3.64E-01 |
| LOC1019295 | 9.07E+00 | 1.24E+00  | 5.45E-01 | 2.31E-02 | 3.65E-01 |
| FAT4       | 1.34E+04 | -1.12E+00 | 4.92E-01 | 2.31E-02 | 3.65E-01 |
| SLC6A1     | 1.05E+03 | 1.22E+00  | 5.38E-01 | 2.31E-02 | 3.65E-01 |
| C1orf204   | 2.07E+01 | -8.99E-01 | 3.96E-01 | 2.33E-02 | 3.65E-01 |
| CDCA2      | 7.69E+01 | 1.14E+00  | 5.03E-01 | 2.32E-02 | 3.65E-01 |
| MAP10      | 6.82E+01 | 1.12E+00  | 4.95E-01 | 2.33E-02 | 3.65E-01 |
| OVCH1      | 1.63E+01 | 1.16E+00  | 5.11E-01 | 2.33E-02 | 3.65E-01 |
| PLAUR      | 6.87E+01 | -8.07E-01 | 3.56E-01 | 2.33E-02 | 3.65E-01 |
| TMEM53     | 1.88E+01 | 9.65E-01  | 4.25E-01 | 2.33E-02 | 3.65E-01 |
| ZBTB1      | 6.22E+02 | 6.22E-01  | 2.74E-01 | 2.34E-02 | 3.66E-01 |
| RASL11A    | 2.14E+01 | 9.42E-01  | 4.16E-01 | 2.34E-02 | 3.66E-01 |
| HSPH1      | 1.17E+03 | -7.06E-01 | 3.11E-01 | 2.35E-02 | 3.66E-01 |
| HSPA5      | 7.00E+03 | -7.25E-01 | 3.20E-01 | 2.35E-02 | 3.67E-01 |
| ZIC4       | 2.33E+02 | -9.94E-01 | 4.39E-01 | 2.35E-02 | 3.67E-01 |
| ZNF843     | 6.83E+00 | -1.10E+00 | 4.85E-01 | 2.36E-02 | 3.67E-01 |
| CSAR1      | 2.09E+02 | -9.33E-01 | 4.12E-01 | 2.36E-02 | 3.68E-01 |
| KYNU       | 2.85E+01 | -9.08E-01 | 4.01E-01 | 2.36E-02 | 3.68E-01 |
| GLIDR      | 6.24E+01 | -9.42E-01 | 4.16E-01 | 2.37E-02 | 3.68E-01 |
| MSRA       | 7.79E+01 | -6.64E-01 | 2.94E-01 | 2.37E-02 | 3.68E-01 |
| SMCO4      | 2.24E+01 | -9.90E-01 | 4.38E-01 | 2.37E-02 | 3.68E-01 |
| FAM35DP    | 1.51E+01 | 9.45E-01  | 4.18E-01 | 2.38E-02 | 3.68E-01 |
| HSD17B2    | 1.57E+02 | 9.85E-01  | 4.36E-01 | 2.38E-02 | 3.68E-01 |
| HECTD1     | 2.99E+03 | 6.35E-01  | 2.81E-01 | 2.39E-02 | 3.69E-01 |
| TASP1      | 1.50E+02 | 5.39E-01  | 2.38E-01 | 2.39E-02 | 3.69E-01 |
| SOS2       | 1.16E+03 | 7.53E-01  | 3.33E-01 | 2.39E-02 | 3.69E-01 |
| MAPK1IP1L  | 1.49E+03 | 6.37E-01  | 2.82E-01 | 2.41E-02 | 3.70E-01 |
| POFUT1     | 1.31E+03 | 5.36E-01  | 2.38E-01 | 2.40E-02 | 3.70E-01 |
| SERTAD2    | 2.39E+02 | -7.01E-01 | 3.11E-01 | 2.40E-02 | 3.70E-01 |
| UBR7       | 4.17E+02 | 5.25E-01  | 2.33E-01 | 2.41E-02 | 3.70E-01 |
| LIMK1      | 3.49E+02 | -5.63E-01 | 2.49E-01 | 2.41E-02 | 3.71E-01 |
| BLNK       | 1.12E+02 | -9.21E-01 | 4.09E-01 | 2.42E-02 | 3.72E-01 |
| CXCL1      | 3.80E+00 | 1.17E+00  | 5.21E-01 | 2.43E-02 | 3.72E-01 |
| HRSP12     | 5.05E+01 | -6.69E-01 | 2.97E-01 | 2.43E-02 | 3.72E-01 |
| NT5DC1     | 3.03E+02 | -5.92E-01 | 2.63E-01 | 2.43E-02 | 3.72E-01 |
| AKR7A3     | 9.48E+00 | 9.95E-01  | 4.42E-01 | 2.44E-02 | 3.72E-01 |
| SLC10A4    | 5.69E+00 | 1.23E+00  | 5.45E-01 | 2.44E-02 | 3.72E-01 |
| ARID4A     | 5.12E+02 | 6.52E-01  | 2.90E-01 | 2.45E-02 | 3.73E-01 |
| TRAPPC6B   | 3.66E+02 | 7.72E-01  | 3.43E-01 | 2.45E-02 | 3.73E-01 |
| RECK       | 1.25E+03 | -7.18E-01 | 3.19E-01 | 2.45E-02 | 3.73E-01 |
| GREB1      | 7.11E+02 | 1.19E+00  | 5.30E-01 | 2.47E-02 | 3.75E-01 |
| HEPACAM2   | 1.08E+01 | -1.17E+00 | 5.20E-01 | 2.47E-02 | 3.75E-01 |
| PPP1R3E    | 1.30E+02 | 7.16E-01  | 3.19E-01 | 2.48E-02 | 3.76E-01 |
| RNFT1      | 1.55E+02 | -6.15E-01 | 2.74E-01 | 2.49E-02 | 3.77E-01 |
| ATP6V0E2-A | 8.15E+01 | -9.66E-01 | 4.31E-01 | 2.49E-02 | 3.78E-01 |
| CDCA4      | 1.01E+02 | 7.78E-01  | 3.48E-01 | 2.51E-02 | 3.79E-01 |
| NDUFB9     | 3.45E+02 | -6.18E-01 | 2.76E-01 | 2.51E-02 | 3.79E-01 |
| SV2B       | 1.90E+01 | -1.20E+00 | 5.38E-01 | 2.51E-02 | 3.79E-01 |
| TTC3       | 4.98E+03 | 4.44E-01  | 1.98E-01 | 2.51E-02 | 3.79E-01 |

|           |          |           |          |          |          |
|-----------|----------|-----------|----------|----------|----------|
| CTSS      | 5.99E+02 | -8.43E-01 | 3.76E-01 | 2.52E-02 | 3.80E-01 |
| SALL1     | 1.94E+02 | -1.22E+00 | 5.44E-01 | 2.52E-02 | 3.80E-01 |
| KIAA0391  | 4.69E+02 | 6.13E-01  | 2.74E-01 | 2.53E-02 | 3.81E-01 |
| ASXL1     | 1.57E+03 | 4.97E-01  | 2.23E-01 | 2.56E-02 | 3.81E-01 |
| ATR       | 8.63E+02 | -5.33E-01 | 2.39E-01 | 2.57E-02 | 3.81E-01 |
| BCAS4     | 8.55E+01 | 1.13E+00  | 5.05E-01 | 2.55E-02 | 3.81E-01 |
| C19orf26  | 1.62E+01 | -1.21E+00 | 5.42E-01 | 2.55E-02 | 3.81E-01 |
| CASC15    | 4.94E+01 | -1.21E+00 | 5.43E-01 | 2.58E-02 | 3.81E-01 |
| CNNM3     | 3.51E+02 | -4.59E-01 | 2.06E-01 | 2.58E-02 | 3.81E-01 |
| DHX29     | 6.57E+02 | 3.60E-01  | 1.61E-01 | 2.55E-02 | 3.81E-01 |
| DOHH      | 5.24E+01 | -7.08E-01 | 3.18E-01 | 2.58E-02 | 3.81E-01 |
| ERAP1     | 1.13E+03 | -6.10E-01 | 2.74E-01 | 2.58E-02 | 3.81E-01 |
| FAT3      | 6.84E+02 | -1.15E+00 | 5.18E-01 | 2.59E-02 | 3.81E-01 |
| HLA-C     | 1.33E+03 | -6.18E-01 | 2.76E-01 | 2.55E-02 | 3.81E-01 |
| IL1RAP    | 3.35E+02 | -8.05E-01 | 3.61E-01 | 2.57E-02 | 3.81E-01 |
| LNX2      | 5.82E+02 | 6.63E-01  | 2.97E-01 | 2.54E-02 | 3.81E-01 |
| MCAM      | 2.08E+03 | 1.04E+00  | 4.64E-01 | 2.58E-02 | 3.81E-01 |
| MTA1      | 6.92E+02 | 7.21E-01  | 3.23E-01 | 2.57E-02 | 3.81E-01 |
| PNMA6A    | 8.09E+00 | 1.11E+00  | 4.97E-01 | 2.54E-02 | 3.81E-01 |
| POLN      | 4.02E+01 | 6.54E-01  | 2.93E-01 | 2.55E-02 | 3.81E-01 |
| SLC2A4RG  | 5.28E+02 | 6.95E-01  | 3.11E-01 | 2.56E-02 | 3.81E-01 |
| STYX      | 2.85E+02 | 5.53E-01  | 2.47E-01 | 2.54E-02 | 3.81E-01 |
| TSPYL1    | 2.07E+03 | -5.69E-01 | 2.55E-01 | 2.57E-02 | 3.81E-01 |
| ZNF180    | 1.26E+02 | 6.07E-01  | 2.72E-01 | 2.58E-02 | 3.81E-01 |
| ZNFX1     | 1.75E+03 | 5.90E-01  | 2.64E-01 | 2.57E-02 | 3.81E-01 |
| ZFYVE21   | 3.21E+02 | 8.30E-01  | 3.73E-01 | 2.59E-02 | 3.81E-01 |
| FAM184A   | 4.85E+01 | -1.10E+00 | 4.96E-01 | 2.60E-02 | 3.82E-01 |
| ALS2CL    | 2.84E+02 | -9.98E-01 | 4.49E-01 | 2.63E-02 | 3.84E-01 |
| AP5S1     | 2.44E+02 | 7.32E-01  | 3.29E-01 | 2.62E-02 | 3.84E-01 |
| C14orf166 | 6.04E+02 | 6.18E-01  | 2.78E-01 | 2.62E-02 | 3.84E-01 |
| CERS6     | 7.96E+02 | 3.81E-01  | 1.71E-01 | 2.62E-02 | 3.84E-01 |
| CHD8      | 1.70E+03 | 6.34E-01  | 2.85E-01 | 2.63E-02 | 3.84E-01 |
| DCDC5     | 2.21E+01 | -1.11E+00 | 5.00E-01 | 2.64E-02 | 3.84E-01 |
| DCUN1D2   | 2.65E+02 | 6.63E-01  | 2.99E-01 | 2.64E-02 | 3.84E-01 |
| DOK4      | 3.12E+02 | -5.28E-01 | 2.38E-01 | 2.63E-02 | 3.84E-01 |
| LBX2      | 9.40E+00 | -1.21E+00 | 5.45E-01 | 2.64E-02 | 3.84E-01 |
| MAX       | 5.45E+02 | 5.68E-01  | 2.56E-01 | 2.64E-02 | 3.84E-01 |
| NPY6R     | 1.14E+01 | -1.19E+00 | 5.36E-01 | 2.62E-02 | 3.84E-01 |
| THAP11    | 1.77E+02 | -6.03E-01 | 2.71E-01 | 2.63E-02 | 3.84E-01 |
| TMEM102   | 1.87E+01 | -1.13E+00 | 5.11E-01 | 2.64E-02 | 3.84E-01 |
| TULP1     | 5.89E+00 | -1.21E+00 | 5.44E-01 | 2.63E-02 | 3.84E-01 |
| MGAT2     | 4.19E+02 | 7.13E-01  | 3.21E-01 | 2.65E-02 | 3.84E-01 |
| YJEFN3    | 2.55E+01 | -9.90E-01 | 4.46E-01 | 2.64E-02 | 3.84E-01 |
| WNT2B     | 8.97E+01 | 1.19E+00  | 5.37E-01 | 2.66E-02 | 3.85E-01 |
| SMOX      | 3.17E+02 | 1.06E+00  | 4.78E-01 | 2.67E-02 | 3.86E-01 |
| CHCHD4    | 1.17E+02 | -7.07E-01 | 3.19E-01 | 2.68E-02 | 3.86E-01 |
| CORO1C    | 2.23E+03 | 5.46E-01  | 2.46E-01 | 2.68E-02 | 3.86E-01 |
| HES4      | 1.83E+02 | 9.53E-01  | 4.30E-01 | 2.67E-02 | 3.86E-01 |
| IFT172    | 5.71E+02 | -6.56E-01 | 2.96E-01 | 2.67E-02 | 3.86E-01 |
| PEX5L     | 7.48E+01 | -1.21E+00 | 5.45E-01 | 2.68E-02 | 3.86E-01 |
| PPP2R5E   | 4.78E+02 | 6.04E-01  | 2.73E-01 | 2.68E-02 | 3.86E-01 |
| TNRC18P1  | 2.17E+01 | 1.02E+00  | 4.59E-01 | 2.68E-02 | 3.86E-01 |
| MND1      | 1.10E+01 | 1.15E+00  | 5.21E-01 | 2.69E-02 | 3.87E-01 |

|           |          |           |          |          |          |
|-----------|----------|-----------|----------|----------|----------|
| ATP2C1    | 1.27E+03 | -4.71E-01 | 2.13E-01 | 2.70E-02 | 3.87E-01 |
| TRMT12    | 1.26E+02 | -6.81E-01 | 3.08E-01 | 2.70E-02 | 3.87E-01 |
| PIGG      | 9.59E+02 | 5.78E-01  | 2.61E-01 | 2.70E-02 | 3.87E-01 |
| GNGT2     | 1.56E+01 | -1.07E+00 | 4.85E-01 | 2.71E-02 | 3.89E-01 |
| NAA30     | 2.79E+02 | 5.94E-01  | 2.69E-01 | 2.72E-02 | 3.89E-01 |
| ZNF93     | 7.70E+01 | 8.44E-01  | 3.82E-01 | 2.72E-02 | 3.89E-01 |
| SYT2      | 5.44E+00 | 1.20E+00  | 5.44E-01 | 2.72E-02 | 3.89E-01 |
| FAM78B    | 2.42E+01 | -1.19E+00 | 5.41E-01 | 2.73E-02 | 3.89E-01 |
| MYLK4     | 2.61E+02 | -1.20E+00 | 5.43E-01 | 2.74E-02 | 3.90E-01 |
| SHANK3    | 4.89E+02 | 1.10E+00  | 5.01E-01 | 2.74E-02 | 3.90E-01 |
| ABCA7     | 3.68E+02 | -6.54E-01 | 2.96E-01 | 2.75E-02 | 3.91E-01 |
| LILRA5    | 4.01E+00 | 1.20E+00  | 5.45E-01 | 2.75E-02 | 3.91E-01 |
| LINC01057 | 1.61E+01 | -1.05E+00 | 4.77E-01 | 2.76E-02 | 3.91E-01 |
| RHOT2     | 6.27E+02 | -4.75E-01 | 2.15E-01 | 2.75E-02 | 3.91E-01 |
| DCAF5     | 1.17E+03 | 6.96E-01  | 3.16E-01 | 2.76E-02 | 3.91E-01 |
| PCMTD2    | 9.47E+02 | 4.26E-01  | 1.93E-01 | 2.76E-02 | 3.91E-01 |
| ACSM5     | 2.16E+01 | -1.13E+00 | 5.13E-01 | 2.77E-02 | 3.91E-01 |
| FRA10AC1  | 1.27E+02 | 7.63E-01  | 3.46E-01 | 2.77E-02 | 3.91E-01 |
| PEX1      | 3.49E+02 | -3.96E-01 | 1.80E-01 | 2.77E-02 | 3.91E-01 |
| CDADC1    | 9.32E+01 | 5.34E-01  | 2.43E-01 | 2.78E-02 | 3.92E-01 |
| DEPDC1B   | 2.14E+01 | 1.18E+00  | 5.38E-01 | 2.78E-02 | 3.92E-01 |
| IKZF4     | 9.65E+01 | 8.25E-01  | 3.75E-01 | 2.79E-02 | 3.92E-01 |
| PRKRA     | 2.75E+02 | -3.73E-01 | 1.69E-01 | 2.78E-02 | 3.92E-01 |
| SORCS1    | 8.54E+01 | -1.19E+00 | 5.42E-01 | 2.79E-02 | 3.92E-01 |
| SUGT1     | 3.43E+02 | 4.10E-01  | 1.87E-01 | 2.78E-02 | 3.92E-01 |
| THBD      | 2.55E+02 | 1.16E+00  | 5.30E-01 | 2.79E-02 | 3.92E-01 |
| MAMLD1    | 7.70E+01 | 1.05E+00  | 4.76E-01 | 2.79E-02 | 3.92E-01 |
| PHLDB3    | 5.92E+01 | -8.26E-01 | 3.76E-01 | 2.79E-02 | 3.92E-01 |
| NID1      | 2.06E+03 | 9.87E-01  | 4.49E-01 | 2.80E-02 | 3.92E-01 |
| EPHA7     | 3.02E+03 | -1.12E+00 | 5.09E-01 | 2.80E-02 | 3.92E-01 |
| REL       | 5.39E+02 | -6.43E-01 | 2.93E-01 | 2.80E-02 | 3.92E-01 |
| RGCC      | 1.68E+02 | 1.10E+00  | 5.00E-01 | 2.81E-02 | 3.92E-01 |
| ADNP      | 2.39E+03 | 4.54E-01  | 2.07E-01 | 2.81E-02 | 3.92E-01 |
| CHURC1    | 6.87E+02 | 6.96E-01  | 3.17E-01 | 2.81E-02 | 3.92E-01 |
| HACL1     | 1.96E+02 | -5.34E-01 | 2.43E-01 | 2.82E-02 | 3.92E-01 |
| TCERG1    | 1.05E+03 | 4.32E-01  | 1.97E-01 | 2.82E-02 | 3.92E-01 |
| PROSER2   | 2.34E+02 | 8.80E-01  | 4.01E-01 | 2.83E-02 | 3.94E-01 |
| BCL2L2    | 5.07E+02 | 7.49E-01  | 3.42E-01 | 2.84E-02 | 3.94E-01 |
| MEOX2     | 1.78E+03 | -1.05E+00 | 4.78E-01 | 2.84E-02 | 3.94E-01 |
| NPW       | 5.65E+01 | -1.19E+00 | 5.41E-01 | 2.85E-02 | 3.94E-01 |
| RANBP10   | 4.33E+02 | -5.80E-01 | 2.65E-01 | 2.84E-02 | 3.94E-01 |
| STX16     | 8.85E+02 | 5.61E-01  | 2.56E-01 | 2.85E-02 | 3.94E-01 |
| TAT       | 2.94E+00 | 9.91E-01  | 4.52E-01 | 2.85E-02 | 3.94E-01 |
| USP16     | 7.24E+02 | 4.47E-01  | 2.04E-01 | 2.85E-02 | 3.94E-01 |
| AACS      | 4.40E+02 | 5.42E-01  | 2.48E-01 | 2.91E-02 | 3.95E-01 |
| ATP2B3    | 1.05E+01 | 1.19E+00  | 5.45E-01 | 2.91E-02 | 3.95E-01 |
| COL4A2    | 2.16E+03 | 1.06E+00  | 4.85E-01 | 2.90E-02 | 3.95E-01 |
| CPEB2     | 7.39E+02 | 9.84E-01  | 4.50E-01 | 2.87E-02 | 3.95E-01 |
| EDN1      | 2.22E+01 | 1.02E+00  | 4.67E-01 | 2.91E-02 | 3.95E-01 |
| ERMP1     | 2.20E+03 | -8.16E-01 | 3.73E-01 | 2.88E-02 | 3.95E-01 |
| FAM195A   | 8.76E+01 | -9.58E-01 | 4.39E-01 | 2.89E-02 | 3.95E-01 |
| FGL2      | 1.07E+04 | -1.12E+00 | 5.12E-01 | 2.88E-02 | 3.95E-01 |
| GPR137C   | 1.09E+02 | 8.63E-01  | 3.94E-01 | 2.87E-02 | 3.95E-01 |

|            |          |           |          |          |          |
|------------|----------|-----------|----------|----------|----------|
| IL21R      | 7.64E+00 | -1.16E+00 | 5.29E-01 | 2.88E-02 | 3.95E-01 |
| LOC1019285 | 7.61E+00 | 1.15E+00  | 5.25E-01 | 2.89E-02 | 3.95E-01 |
| MIPOL1     | 9.29E+01 | 9.39E-01  | 4.30E-01 | 2.90E-02 | 3.95E-01 |
| MOCS2      | 4.52E+02 | 5.46E-01  | 2.49E-01 | 2.86E-02 | 3.95E-01 |
| PAWR       | 5.57E+02 | 8.41E-01  | 3.85E-01 | 2.88E-02 | 3.95E-01 |
| PGM5       | 2.26E+02 | -1.11E+00 | 5.07E-01 | 2.91E-02 | 3.95E-01 |
| POLR2A     | 1.90E+03 | 5.94E-01  | 2.72E-01 | 2.87E-02 | 3.95E-01 |
| SH3BP1     | 9.88E+01 | -9.42E-01 | 4.31E-01 | 2.89E-02 | 3.95E-01 |
| SOGA1      | 1.41E+03 | 8.04E-01  | 3.67E-01 | 2.87E-02 | 3.95E-01 |
| TSPAN9     | 5.80E+02 | 9.84E-01  | 4.50E-01 | 2.89E-02 | 3.95E-01 |
| USO1       | 1.25E+03 | 4.00E-01  | 1.83E-01 | 2.91E-02 | 3.95E-01 |
| WRN        | 5.03E+02 | -7.05E-01 | 3.23E-01 | 2.90E-02 | 3.95E-01 |
| YWHAB      | 2.71E+03 | 5.17E-01  | 2.37E-01 | 2.88E-02 | 3.95E-01 |
| ZNF708     | 6.87E+02 | 5.84E-01  | 2.67E-01 | 2.89E-02 | 3.95E-01 |
| CDC14B     | 4.13E+02 | -5.64E-01 | 2.59E-01 | 2.92E-02 | 3.95E-01 |
| DDR1       | 4.33E+02 | 5.76E-01  | 2.64E-01 | 2.92E-02 | 3.95E-01 |
| MARK3      | 7.19E+02 | 6.72E-01  | 3.08E-01 | 2.93E-02 | 3.95E-01 |
| TMEM161B   | 2.26E+01 | -8.29E-01 | 3.80E-01 | 2.93E-02 | 3.95E-01 |
| TP63       | 1.11E+03 | -1.19E+00 | 5.44E-01 | 2.93E-02 | 3.96E-01 |
| EOGT       | 2.68E+02 | 8.22E-01  | 3.77E-01 | 2.94E-02 | 3.97E-01 |
| ZNF568     | 2.51E+02 | 6.27E-01  | 2.88E-01 | 2.94E-02 | 3.97E-01 |
| AIFM1      | 3.31E+02 | -5.07E-01 | 2.33E-01 | 2.98E-02 | 3.97E-01 |
| AKAP1      | 8.41E+02 | -6.00E-01 | 2.76E-01 | 2.99E-02 | 3.97E-01 |
| ARPP19     | 2.34E+03 | 5.01E-01  | 2.30E-01 | 2.97E-02 | 3.97E-01 |
| BRWD1      | 2.65E+03 | 3.90E-01  | 1.79E-01 | 2.95E-02 | 3.97E-01 |
| C19orf68   | 4.38E+01 | 6.57E-01  | 3.03E-01 | 3.00E-02 | 3.97E-01 |
| CCDC153    | 8.23E+00 | 1.13E+00  | 5.19E-01 | 2.97E-02 | 3.97E-01 |
| DGCR6      | 2.56E+01 | -1.03E+00 | 4.72E-01 | 2.99E-02 | 3.97E-01 |
| EGFL6      | 9.78E+02 | -1.13E+00 | 5.21E-01 | 3.00E-02 | 3.97E-01 |
| FAM167A    | 4.55E+02 | -1.09E+00 | 5.01E-01 | 2.96E-02 | 3.97E-01 |
| FPR2       | 3.33E+00 | 1.18E+00  | 5.45E-01 | 2.99E-02 | 3.97E-01 |
| GATA3      | 5.34E+01 | -1.17E+00 | 5.37E-01 | 2.97E-02 | 3.97E-01 |
| GLDN       | 1.09E+02 | -1.18E+00 | 5.44E-01 | 2.99E-02 | 3.97E-01 |
| LINC01278  | 1.44E+02 | 5.72E-01  | 2.63E-01 | 2.99E-02 | 3.97E-01 |
| LOC1026064 | 1.42E+01 | -1.04E+00 | 4.76E-01 | 2.97E-02 | 3.97E-01 |
| MB21D1     | 2.38E+01 | -9.05E-01 | 4.17E-01 | 3.00E-02 | 3.97E-01 |
| MED14      | 1.11E+03 | 4.86E-01  | 2.24E-01 | 2.99E-02 | 3.97E-01 |
| NBPF3      | 7.43E+01 | -8.71E-01 | 4.02E-01 | 3.00E-02 | 3.97E-01 |
| PDE4B      | 1.30E+02 | -8.25E-01 | 3.79E-01 | 2.97E-02 | 3.97E-01 |
| PSMC1      | 3.50E+02 | 4.40E-01  | 2.03E-01 | 2.98E-02 | 3.97E-01 |
| PVRL3      | 7.41E+02 | -6.64E-01 | 3.06E-01 | 3.00E-02 | 3.97E-01 |
| RALGAPB    | 1.90E+03 | 5.90E-01  | 2.72E-01 | 3.00E-02 | 3.97E-01 |
| RCOR1      | 4.26E+02 | 7.57E-01  | 3.49E-01 | 3.00E-02 | 3.97E-01 |
| VSIG4      | 6.07E+02 | -9.49E-01 | 4.38E-01 | 3.00E-02 | 3.97E-01 |
| ZC3H13     | 1.42E+03 | 5.35E-01  | 2.46E-01 | 3.01E-02 | 3.97E-01 |
| PPAP2C     | 3.10E+01 | -1.04E+00 | 4.80E-01 | 3.01E-02 | 3.97E-01 |
| MS4A14     | 6.01E+01 | -1.01E+00 | 4.67E-01 | 3.01E-02 | 3.97E-01 |
| PXYLP1     | 1.03E+02 | 7.20E-01  | 3.32E-01 | 3.02E-02 | 3.97E-01 |
| UBE2D2     | 6.26E+02 | 3.71E-01  | 1.71E-01 | 3.02E-02 | 3.97E-01 |
| YPEL4      | 4.58E+00 | 1.18E+00  | 5.45E-01 | 3.02E-02 | 3.97E-01 |
| KAT2B      | 1.20E+03 | -6.05E-01 | 2.79E-01 | 3.03E-02 | 3.98E-01 |
| ULK2       | 4.90E+02 | 5.15E-01  | 2.38E-01 | 3.03E-02 | 3.98E-01 |
| LEPR       | 8.17E+03 | -1.10E+00 | 5.06E-01 | 3.05E-02 | 4.00E-01 |

|            |          |           |          |          |          |
|------------|----------|-----------|----------|----------|----------|
| VAMP1      | 2.14E+02 | 5.96E-01  | 2.76E-01 | 3.05E-02 | 4.00E-01 |
| DPM1       | 2.23E+02 | 5.00E-01  | 2.31E-01 | 3.06E-02 | 4.00E-01 |
| HYMAI      | 6.64E+01 | 1.05E+00  | 4.85E-01 | 3.06E-02 | 4.00E-01 |
| CTBP2      | 1.39E+03 | 5.41E-01  | 2.50E-01 | 3.08E-02 | 4.03E-01 |
| BLCAP      | 1.65E+03 | 7.48E-01  | 3.47E-01 | 3.08E-02 | 4.03E-01 |
| BMS1P4     | 9.69E+01 | 4.42E-01  | 2.05E-01 | 3.09E-02 | 4.04E-01 |
| PPM1A      | 9.70E+02 | 6.42E-01  | 2.98E-01 | 3.10E-02 | 4.04E-01 |
| C4orf36    | 4.88E+00 | 1.04E+00  | 4.86E-01 | 3.14E-02 | 4.04E-01 |
| CINP       | 1.39E+02 | 6.46E-01  | 3.00E-01 | 3.14E-02 | 4.04E-01 |
| DIP2B      | 3.45E+03 | -5.77E-01 | 2.68E-01 | 3.12E-02 | 4.04E-01 |
| DNM3       | 2.38E+02 | 9.31E-01  | 4.32E-01 | 3.13E-02 | 4.04E-01 |
| FBLN7      | 2.61E+01 | -1.13E+00 | 5.23E-01 | 3.11E-02 | 4.04E-01 |
| KIAA0247   | 2.12E+03 | 7.26E-01  | 3.37E-01 | 3.13E-02 | 4.04E-01 |
| LAIR1      | 3.47E+02 | -8.17E-01 | 3.80E-01 | 3.14E-02 | 4.04E-01 |
| LAT2       | 1.46E+02 | -8.97E-01 | 4.17E-01 | 3.13E-02 | 4.04E-01 |
| LOC1019268 | 3.95E+01 | 1.12E+00  | 5.22E-01 | 3.14E-02 | 4.04E-01 |
| MCM8       | 1.08E+02 | 6.44E-01  | 2.99E-01 | 3.13E-02 | 4.04E-01 |
| NEFH       | 3.15E+01 | 1.17E+00  | 5.44E-01 | 3.14E-02 | 4.04E-01 |
| PNMT       | 7.65E+00 | 1.12E+00  | 5.18E-01 | 3.12E-02 | 4.04E-01 |
| POLR1B     | 5.46E+02 | -6.13E-01 | 2.85E-01 | 3.14E-02 | 4.04E-01 |
| SLC9A3R1   | 8.64E+02 | 8.50E-01  | 3.95E-01 | 3.13E-02 | 4.04E-01 |
| SLIRP      | 1.30E+02 | 5.97E-01  | 2.77E-01 | 3.11E-02 | 4.04E-01 |
| SVIP       | 1.78E+02 | 5.17E-01  | 2.40E-01 | 3.14E-02 | 4.04E-01 |
| ZMYND15    | 4.86E+01 | -7.72E-01 | 3.58E-01 | 3.13E-02 | 4.04E-01 |
| ZNF780A    | 3.75E+02 | 3.70E-01  | 1.72E-01 | 3.11E-02 | 4.04E-01 |
| TAC3       | 6.80E+01 | -1.16E+00 | 5.40E-01 | 3.15E-02 | 4.04E-01 |
| L3HYPDH    | 9.73E+01 | 6.51E-01  | 3.03E-01 | 3.15E-02 | 4.04E-01 |
| PXN        | 4.01E+03 | 8.59E-01  | 3.99E-01 | 3.16E-02 | 4.04E-01 |
| RGS5       | 5.31E+03 | 9.85E-01  | 4.58E-01 | 3.15E-02 | 4.04E-01 |
| ARFRP1     | 3.10E+02 | 5.99E-01  | 2.79E-01 | 3.18E-02 | 4.05E-01 |
| CD74       | 9.10E+03 | -9.01E-01 | 4.20E-01 | 3.18E-02 | 4.05E-01 |
| EPB41L2    | 5.04E+03 | -7.88E-01 | 3.67E-01 | 3.18E-02 | 4.05E-01 |
| HEY2       | 6.07E+01 | 1.07E+00  | 4.98E-01 | 3.18E-02 | 4.05E-01 |
| IFRD2      | 3.38E+02 | -6.52E-01 | 3.04E-01 | 3.19E-02 | 4.05E-01 |
| IGSF21     | 1.01E+02 | -1.04E+00 | 4.84E-01 | 3.18E-02 | 4.05E-01 |
| LOC1001323 | 3.45E+01 | 7.41E-01  | 3.45E-01 | 3.18E-02 | 4.05E-01 |
| PURG       | 1.19E+02 | -1.10E+00 | 5.12E-01 | 3.19E-02 | 4.05E-01 |
| SLC16A6    | 6.13E+02 | 1.05E+00  | 4.91E-01 | 3.18E-02 | 4.05E-01 |
| WWC1       | 2.92E+02 | -9.98E-01 | 4.65E-01 | 3.17E-02 | 4.05E-01 |
| COL4A3BP   | 1.11E+03 | 7.72E-01  | 3.60E-01 | 3.20E-02 | 4.06E-01 |
| DET1       | 1.46E+02 | 5.04E-01  | 2.35E-01 | 3.20E-02 | 4.06E-01 |
| LOC1019286 | 3.84E+00 | 1.16E+00  | 5.41E-01 | 3.20E-02 | 4.06E-01 |
| PDRG1      | 9.71E+01 | 6.57E-01  | 3.06E-01 | 3.20E-02 | 4.06E-01 |
| LINC00664  | 3.59E+01 | 1.14E+00  | 5.35E-01 | 3.22E-02 | 4.08E-01 |
| MMP24      | 3.71E+01 | 1.09E+00  | 5.11E-01 | 3.24E-02 | 4.09E-01 |
| OR51B2     | 6.59E+00 | 1.12E+00  | 5.25E-01 | 3.24E-02 | 4.09E-01 |
| SYTL5      | 9.72E+01 | -1.16E+00 | 5.44E-01 | 3.24E-02 | 4.09E-01 |
| TECPR2     | 4.96E+02 | 5.94E-01  | 2.77E-01 | 3.24E-02 | 4.09E-01 |
| TSPYL2     | 2.31E+03 | 7.78E-01  | 3.64E-01 | 3.25E-02 | 4.09E-01 |
| C14orf28   | 3.97E+01 | 7.69E-01  | 3.60E-01 | 3.25E-02 | 4.09E-01 |
| ZFPM2      | 4.71E+01 | -1.06E+00 | 4.95E-01 | 3.25E-02 | 4.09E-01 |
| PIGT       | 1.89E+03 | 5.11E-01  | 2.39E-01 | 3.26E-02 | 4.10E-01 |
| FKBP1A     | 1.08E+03 | 5.78E-01  | 2.71E-01 | 3.27E-02 | 4.10E-01 |



|          |          |           |          |          |          |
|----------|----------|-----------|----------|----------|----------|
| KCNJ9    | 3.53E+00 | -1.16E+00 | 5.45E-01 | 3.27E-02 | 4.10E-01 |
| RAE1     | 2.08E+02 | 5.14E-01  | 2.41E-01 | 3.27E-02 | 4.10E-01 |
| SDC4     | 6.34E+02 | 7.61E-01  | 3.56E-01 | 3.26E-02 | 4.10E-01 |
| ZNF516   | 7.96E+02 | -6.93E-01 | 3.25E-01 | 3.27E-02 | 4.10E-01 |
| C3orf14  | 4.73E+01 | -7.79E-01 | 3.65E-01 | 3.28E-02 | 4.10E-01 |
| FLJ31306 | 6.69E+02 | 6.25E-01  | 2.93E-01 | 3.28E-02 | 4.11E-01 |
| RAB15    | 5.31E+01 | 9.38E-01  | 4.40E-01 | 3.29E-02 | 4.11E-01 |
| ATP8B1   | 7.61E+02 | 8.90E-01  | 4.18E-01 | 3.31E-02 | 4.12E-01 |
| CSF1R    | 2.33E+03 | -8.68E-01 | 4.07E-01 | 3.31E-02 | 4.12E-01 |
| DPEP2    | 1.75E+01 | -1.14E+00 | 5.35E-01 | 3.32E-02 | 4.12E-01 |
| FAM129B  | 1.94E+03 | 7.36E-01  | 3.45E-01 | 3.31E-02 | 4.12E-01 |
| IMPAD1   | 3.13E+03 | -5.26E-01 | 2.47E-01 | 3.32E-02 | 4.12E-01 |
| KCNE4    | 6.00E+02 | -9.77E-01 | 4.58E-01 | 3.30E-02 | 4.12E-01 |
| PAFAH2   | 1.01E+02 | -5.46E-01 | 2.56E-01 | 3.32E-02 | 4.12E-01 |
| RNA5-8S5 | 1.21E+03 | 5.02E-01  | 2.36E-01 | 3.32E-02 | 4.12E-01 |
| INTS9    | 1.19E+02 | -5.63E-01 | 2.64E-01 | 3.32E-02 | 4.12E-01 |
| LBX2-AS1 | 4.64E+01 | -1.12E+00 | 5.24E-01 | 3.33E-02 | 4.13E-01 |
| PTER     | 1.35E+02 | -8.61E-01 | 4.04E-01 | 3.33E-02 | 4.13E-01 |
| BASP1    | 2.73E+02 | 9.04E-01  | 4.25E-01 | 3.34E-02 | 4.13E-01 |
| IL17RC   | 3.27E+02 | -5.72E-01 | 2.69E-01 | 3.36E-02 | 4.15E-01 |
| LIPT1    | 3.89E+01 | -6.47E-01 | 3.04E-01 | 3.35E-02 | 4.15E-01 |
| NCK1-AS1 | 2.22E+01 | -9.06E-01 | 4.26E-01 | 3.36E-02 | 4.15E-01 |
| ZNF239   | 3.69E+01 | 7.57E-01  | 3.56E-01 | 3.36E-02 | 4.15E-01 |
| CDS2     | 2.05E+03 | 7.29E-01  | 3.43E-01 | 3.37E-02 | 4.15E-01 |
| NDUFB10  | 4.13E+02 | -5.35E-01 | 2.52E-01 | 3.36E-02 | 4.15E-01 |
| TMEM50B  | 1.23E+03 | 4.78E-01  | 2.25E-01 | 3.37E-02 | 4.15E-01 |
| U2AF1    | 4.26E+02 | 3.95E-01  | 1.86E-01 | 3.37E-02 | 4.15E-01 |
| HTATSFP2 | 5.39E+01 | -1.10E+00 | 5.19E-01 | 3.38E-02 | 4.15E-01 |
| STX11    | 4.17E+01 | -6.23E-01 | 2.94E-01 | 3.38E-02 | 4.16E-01 |
| CCDC14   | 7.75E+02 | -6.28E-01 | 2.96E-01 | 3.39E-02 | 4.16E-01 |
| CD47     | 1.62E+03 | -3.78E-01 | 1.78E-01 | 3.39E-02 | 4.16E-01 |
| MIR503HG | 1.97E+01 | 1.13E+00  | 5.33E-01 | 3.39E-02 | 4.16E-01 |
| EMR1     | 9.70E+00 | -1.09E+00 | 5.15E-01 | 3.40E-02 | 4.16E-01 |
| FARP1    | 8.10E+02 | 9.36E-01  | 4.42E-01 | 3.40E-02 | 4.16E-01 |
| LPGAT1   | 1.45E+03 | 8.06E-01  | 3.80E-01 | 3.40E-02 | 4.16E-01 |
| ZNF512B  | 1.08E+03 | 6.50E-01  | 3.07E-01 | 3.41E-02 | 4.17E-01 |
| AAK1     | 2.00E+03 | -4.23E-01 | 1.99E-01 | 3.42E-02 | 4.17E-01 |
| IQSEC3   | 1.23E+02 | 1.15E+00  | 5.42E-01 | 3.41E-02 | 4.17E-01 |
| MIOS     | 2.94E+02 | -3.37E-01 | 1.59E-01 | 3.42E-02 | 4.17E-01 |
| RRN3P1   | 6.61E+01 | -6.70E-01 | 3.17E-01 | 3.42E-02 | 4.17E-01 |
| CDKN3    | 1.99E+01 | 9.94E-01  | 4.69E-01 | 3.43E-02 | 4.17E-01 |
| RELL2    | 7.09E+01 | -9.45E-01 | 4.47E-01 | 3.43E-02 | 4.17E-01 |
| CNTNAP2  | 1.32E+01 | -1.12E+00 | 5.30E-01 | 3.46E-02 | 4.18E-01 |
| GFOD1    | 9.80E+01 | 9.58E-01  | 4.53E-01 | 3.45E-02 | 4.18E-01 |
| MIB1     | 1.86E+03 | 7.06E-01  | 3.34E-01 | 3.46E-02 | 4.18E-01 |
| MTO1     | 2.20E+02 | -5.63E-01 | 2.66E-01 | 3.45E-02 | 4.18E-01 |
| NT5C2    | 1.32E+03 | 6.55E-01  | 3.10E-01 | 3.46E-02 | 4.18E-01 |
| PABPN1   | 2.12E+02 | 6.77E-01  | 3.20E-01 | 3.46E-02 | 4.18E-01 |
| PDP1     | 8.74E+02 | -5.32E-01 | 2.52E-01 | 3.45E-02 | 4.18E-01 |
| PFKL     | 1.70E+03 | 7.48E-01  | 3.54E-01 | 3.46E-02 | 4.18E-01 |
| ROBO3    | 7.71E+01 | -1.03E+00 | 4.88E-01 | 3.45E-02 | 4.18E-01 |
| C9orf69  | 2.40E+02 | -5.68E-01 | 2.69E-01 | 3.47E-02 | 4.18E-01 |
| NOL6     | 6.50E+02 | -4.37E-01 | 2.07E-01 | 3.47E-02 | 4.18E-01 |

|            |          |           |          |          |          |
|------------|----------|-----------|----------|----------|----------|
| FAM117B    | 1.85E+02 | 4.38E-01  | 2.07E-01 | 3.48E-02 | 4.19E-01 |
| KIF11      | 1.43E+02 | 7.69E-01  | 3.64E-01 | 3.49E-02 | 4.21E-01 |
| BIN1       | 5.47E+02 | -6.05E-01 | 2.87E-01 | 3.50E-02 | 4.21E-01 |
| DICER1     | 1.58E+03 | 6.50E-01  | 3.08E-01 | 3.51E-02 | 4.21E-01 |
| GPRIN2     | 2.01E+01 | 1.14E+00  | 5.39E-01 | 3.51E-02 | 4.21E-01 |
| HLA-A      | 9.15E+02 | 1.01E+00  | 4.78E-01 | 3.51E-02 | 4.21E-01 |
| MSC        | 3.53E+01 | -1.13E+00 | 5.37E-01 | 3.50E-02 | 4.21E-01 |
| RAD17      | 3.54E+02 | 4.04E-01  | 1.92E-01 | 3.50E-02 | 4.21E-01 |
| SLC31A1    | 5.40E+02 | -7.06E-01 | 3.35E-01 | 3.51E-02 | 4.21E-01 |
| ANKRD20A5  | 1.35E+02 | -1.15E+00 | 5.44E-01 | 3.52E-02 | 4.21E-01 |
| FAM96B     | 2.68E+02 | -4.14E-01 | 1.97E-01 | 3.53E-02 | 4.22E-01 |
| HES6       | 3.86E+01 | 8.21E-01  | 3.90E-01 | 3.53E-02 | 4.22E-01 |
| KIAA1731   | 5.70E+02 | 4.77E-01  | 2.27E-01 | 3.53E-02 | 4.22E-01 |
| CLDN7      | 8.58E+01 | 1.14E+00  | 5.40E-01 | 3.54E-02 | 4.23E-01 |
| SSTR1      | 3.15E+00 | 9.96E-01  | 4.74E-01 | 3.55E-02 | 4.23E-01 |
| TTC7B      | 1.97E+02 | 6.16E-01  | 2.93E-01 | 3.55E-02 | 4.23E-01 |
| WDHD1      | 1.06E+02 | 5.70E-01  | 2.71E-01 | 3.55E-02 | 4.23E-01 |
| COLCA2     | 6.37E+01 | -1.11E+00 | 5.26E-01 | 3.55E-02 | 4.23E-01 |
| ATP2B1     | 9.05E+02 | -4.58E-01 | 2.18E-01 | 3.56E-02 | 4.24E-01 |
| C16orf80   | 1.63E+02 | -3.97E-01 | 1.89E-01 | 3.57E-02 | 4.24E-01 |
| KIF17      | 8.99E+00 | 1.02E+00  | 4.86E-01 | 3.57E-02 | 4.24E-01 |
| PCOLCE2    | 9.36E+01 | -1.13E+00 | 5.36E-01 | 3.58E-02 | 4.24E-01 |
| TAGLN3     | 6.28E+00 | -1.14E+00 | 5.45E-01 | 3.59E-02 | 4.25E-01 |
| CBR3       | 2.88E+01 | 1.08E+00  | 5.14E-01 | 3.61E-02 | 4.26E-01 |
| FBXO31     | 6.08E+02 | -4.65E-01 | 2.22E-01 | 3.61E-02 | 4.26E-01 |
| LOC1005060 | 6.43E+00 | 1.07E+00  | 5.12E-01 | 3.61E-02 | 4.26E-01 |
| MOGS       | 4.80E+02 | -5.10E-01 | 2.43E-01 | 3.61E-02 | 4.26E-01 |
| NEB        | 3.36E+02 | -9.36E-01 | 4.46E-01 | 3.60E-02 | 4.26E-01 |
| RABGEF1    | 4.73E+02 | -4.01E-01 | 1.91E-01 | 3.61E-02 | 4.26E-01 |
| TMC6       | 5.96E+02 | 7.97E-01  | 3.80E-01 | 3.60E-02 | 4.26E-01 |
| XIAP       | 1.25E+03 | 2.83E-01  | 1.35E-01 | 3.61E-02 | 4.26E-01 |
| YAF2       | 5.31E+02 | 5.53E-01  | 2.64E-01 | 3.62E-02 | 4.26E-01 |
| ARRDC5     | 9.46E+00 | -1.13E+00 | 5.40E-01 | 3.63E-02 | 4.26E-01 |
| COX10-AS1  | 6.83E+01 | -6.74E-01 | 3.22E-01 | 3.62E-02 | 4.26E-01 |
| NAA50      | 1.24E+03 | -3.92E-01 | 1.87E-01 | 3.63E-02 | 4.26E-01 |
| RUFY2      | 4.59E+02 | 5.26E-01  | 2.51E-01 | 3.63E-02 | 4.27E-01 |
| NPAS2      | 1.33E+02 | 7.18E-01  | 3.43E-01 | 3.64E-02 | 4.27E-01 |
| EDN3       | 2.00E+02 | 1.12E+00  | 5.34E-01 | 3.65E-02 | 4.27E-01 |
| LRRTM3     | 3.33E+00 | 1.14E+00  | 5.44E-01 | 3.65E-02 | 4.27E-01 |
| N4BP2L2    | 2.01E+03 | 4.14E-01  | 1.98E-01 | 3.66E-02 | 4.27E-01 |
| SLC38A6    | 2.76E+02 | 7.19E-01  | 3.44E-01 | 3.66E-02 | 4.27E-01 |
| SNAPC2     | 9.21E+01 | -5.68E-01 | 2.72E-01 | 3.65E-02 | 4.27E-01 |
| TMEM57     | 4.68E+02 | 6.54E-01  | 3.13E-01 | 3.66E-02 | 4.27E-01 |
| WDSUB1     | 1.50E+02 | -5.13E-01 | 2.45E-01 | 3.64E-02 | 4.27E-01 |
| GABARAPL2  | 6.32E+02 | -5.48E-01 | 2.62E-01 | 3.67E-02 | 4.28E-01 |
| NXNL2      | 1.77E+01 | -8.85E-01 | 4.24E-01 | 3.67E-02 | 4.28E-01 |
| ANKRD32    | 1.43E+02 | 8.28E-01  | 3.97E-01 | 3.68E-02 | 4.29E-01 |
| ABR        | 1.42E+03 | 6.19E-01  | 2.97E-01 | 3.70E-02 | 4.30E-01 |
| ALDH16A1   | 2.28E+02 | -4.57E-01 | 2.19E-01 | 3.71E-02 | 4.30E-01 |
| ANP32A-IT1 | 5.65E+01 | 7.11E-01  | 3.41E-01 | 3.70E-02 | 4.30E-01 |
| C12orf57   | 5.03E+02 | -5.30E-01 | 2.54E-01 | 3.71E-02 | 4.30E-01 |
| CHORDC1    | 2.79E+02 | -4.65E-01 | 2.23E-01 | 3.70E-02 | 4.30E-01 |
| DHRS2      | 7.24E+01 | 1.12E+00  | 5.37E-01 | 3.70E-02 | 4.30E-01 |

|            |          |           |          |          |          |
|------------|----------|-----------|----------|----------|----------|
| TPD52L2    | 1.54E+03 | 6.69E-01  | 3.21E-01 | 3.71E-02 | 4.30E-01 |
| SOAT2      | 3.29E+00 | 1.13E+00  | 5.42E-01 | 3.72E-02 | 4.30E-01 |
| DISP1      | 2.24E+03 | -8.52E-01 | 4.09E-01 | 3.72E-02 | 4.30E-01 |
| CPE        | 7.91E+03 | 1.13E+00  | 5.44E-01 | 3.74E-02 | 4.31E-01 |
| HLA-DRB3   | 5.46E+01 | -1.12E+00 | 5.37E-01 | 3.73E-02 | 4.31E-01 |
| KIFC2      | 4.82E+02 | 6.28E-01  | 3.01E-01 | 3.73E-02 | 4.31E-01 |
| NAGA       | 4.25E+02 | -5.21E-01 | 2.50E-01 | 3.73E-02 | 4.31E-01 |
| SATB2      | 8.87E+01 | 8.22E-01  | 3.95E-01 | 3.73E-02 | 4.31E-01 |
| TYROBP     | 3.53E+02 | -8.16E-01 | 3.92E-01 | 3.74E-02 | 4.31E-01 |
| EVI2B      | 1.72E+02 | -9.51E-01 | 4.57E-01 | 3.74E-02 | 4.31E-01 |
| PLA2G4A    | 8.98E+01 | -8.31E-01 | 4.00E-01 | 3.74E-02 | 4.31E-01 |
| RIPK4      | 2.98E+02 | -1.08E+00 | 5.19E-01 | 3.75E-02 | 4.31E-01 |
| CDIPT      | 5.28E+02 | -3.98E-01 | 1.91E-01 | 3.75E-02 | 4.31E-01 |
| MRPL52     | 1.24E+02 | 6.81E-01  | 3.27E-01 | 3.75E-02 | 4.31E-01 |
| CCDC125    | 2.77E+02 | 4.77E-01  | 2.29E-01 | 3.76E-02 | 4.31E-01 |
| FAM210B    | 9.22E+02 | 4.03E-01  | 1.94E-01 | 3.76E-02 | 4.31E-01 |
| FXYD7      | 1.18E+01 | 1.12E+00  | 5.41E-01 | 3.78E-02 | 4.31E-01 |
| LOC1005064 | 1.60E+01 | 1.04E+00  | 4.99E-01 | 3.77E-02 | 4.31E-01 |
| LOC642236  | 9.80E+00 | 1.13E+00  | 5.43E-01 | 3.77E-02 | 4.31E-01 |
| LOC730102  | 8.57E+01 | -7.21E-01 | 3.47E-01 | 3.76E-02 | 4.31E-01 |
| RUSC1      | 4.78E+02 | 5.89E-01  | 2.83E-01 | 3.77E-02 | 4.31E-01 |
| ZBTB37     | 3.32E+02 | 4.06E-01  | 1.96E-01 | 3.77E-02 | 4.31E-01 |
| DSCAM      | 5.59E+00 | -1.13E+00 | 5.45E-01 | 3.79E-02 | 4.31E-01 |
| HSPA4L     | 4.14E+02 | -8.15E-01 | 3.93E-01 | 3.78E-02 | 4.31E-01 |
| SLC24A3    | 9.96E+02 | 1.08E+00  | 5.20E-01 | 3.78E-02 | 4.31E-01 |
| SMS        | 2.04E+02 | 5.56E-01  | 2.68E-01 | 3.78E-02 | 4.31E-01 |
| EYA1       | 1.56E+03 | -1.11E+00 | 5.36E-01 | 3.79E-02 | 4.31E-01 |
| TTC13      | 1.79E+02 | 4.45E-01  | 2.14E-01 | 3.79E-02 | 4.31E-01 |
| MIS18A     | 8.44E+01 | 5.59E-01  | 2.69E-01 | 3.80E-02 | 4.32E-01 |
| TVP23B     | 2.99E+02 | -4.05E-01 | 1.95E-01 | 3.80E-02 | 4.32E-01 |
| CAPZA2     | 1.20E+03 | -3.20E-01 | 1.54E-01 | 3.81E-02 | 4.32E-01 |
| VPS28      | 5.26E+02 | -4.42E-01 | 2.13E-01 | 3.82E-02 | 4.32E-01 |
| CACNA1H    | 2.61E+02 | 9.78E-01  | 4.72E-01 | 3.83E-02 | 4.33E-01 |
| CHMP4B     | 1.05E+03 | 5.80E-01  | 2.80E-01 | 3.83E-02 | 4.33E-01 |
| EIF2S1     | 5.52E+02 | 4.68E-01  | 2.26E-01 | 3.83E-02 | 4.33E-01 |
| FAM83E     | 8.79E+00 | 1.13E+00  | 5.44E-01 | 3.82E-02 | 4.33E-01 |
| PVRL4      | 4.01E+00 | 1.06E+00  | 5.10E-01 | 3.83E-02 | 4.33E-01 |
| TSEN15     | 2.06E+02 | 6.04E-01  | 2.92E-01 | 3.83E-02 | 4.33E-01 |
| ARFGEF2    | 1.54E+03 | 4.66E-01  | 2.25E-01 | 3.84E-02 | 4.33E-01 |
| CYP2S1     | 1.78E+01 | -9.31E-01 | 4.50E-01 | 3.84E-02 | 4.33E-01 |
| IL17RE     | 3.09E+01 | -1.08E+00 | 5.22E-01 | 3.84E-02 | 4.33E-01 |
| CDC25B     | 1.90E+03 | 6.90E-01  | 3.33E-01 | 3.85E-02 | 4.34E-01 |
| CECR6      | 4.26E+01 | -1.02E+00 | 4.92E-01 | 3.86E-02 | 4.34E-01 |
| ENAH       | 5.72E+03 | 7.17E-01  | 3.47E-01 | 3.86E-02 | 4.34E-01 |
| ANGPTL1    | 5.20E+01 | -1.09E+00 | 5.27E-01 | 3.88E-02 | 4.36E-01 |
| AFF1       | 4.21E+03 | 6.35E-01  | 3.07E-01 | 3.89E-02 | 4.36E-01 |
| DISP2      | 3.51E+02 | 8.68E-01  | 4.20E-01 | 3.89E-02 | 4.36E-01 |
| KLHL28     | 3.07E+02 | 6.05E-01  | 2.93E-01 | 3.89E-02 | 4.36E-01 |
| TENC1      | 3.26E+03 | 4.91E-01  | 2.38E-01 | 3.89E-02 | 4.36E-01 |
| TTC9       | 1.91E+02 | 7.67E-01  | 3.71E-01 | 3.89E-02 | 4.36E-01 |
| LRRC73     | 7.92E+00 | -1.01E+00 | 4.89E-01 | 3.90E-02 | 4.36E-01 |
| ATP11A     | 9.43E+02 | 5.32E-01  | 2.58E-01 | 3.91E-02 | 4.37E-01 |
| ARL4C      | 1.39E+02 | 1.04E+00  | 5.04E-01 | 3.92E-02 | 4.37E-01 |

|            |          |           |          |          |          |
|------------|----------|-----------|----------|----------|----------|
| C14orf2    | 3.14E+02 | 5.72E-01  | 2.78E-01 | 3.94E-02 | 4.37E-01 |
| CD1D       | 1.01E+01 | 1.00E+00  | 4.85E-01 | 3.92E-02 | 4.37E-01 |
| DDX24      | 1.44E+03 | 6.06E-01  | 2.94E-01 | 3.94E-02 | 4.37E-01 |
| HLA-F      | 1.46E+01 | 1.11E+00  | 5.40E-01 | 3.93E-02 | 4.37E-01 |
| HSPB6      | 2.31E+01 | 1.06E+00  | 5.17E-01 | 3.93E-02 | 4.37E-01 |
| MAVS       | 3.75E+03 | 6.27E-01  | 3.04E-01 | 3.92E-02 | 4.37E-01 |
| NEURL1B    | 1.51E+02 | 9.37E-01  | 4.55E-01 | 3.93E-02 | 4.37E-01 |
| TDRD6      | 4.98E+01 | -9.70E-01 | 4.71E-01 | 3.94E-02 | 4.37E-01 |
| ZSWIM3     | 7.57E+01 | 5.54E-01  | 2.69E-01 | 3.93E-02 | 4.37E-01 |
| CORO2B     | 3.19E+02 | 1.08E+00  | 5.26E-01 | 3.96E-02 | 4.38E-01 |
| EDC4       | 7.27E+02 | -3.52E-01 | 1.71E-01 | 3.96E-02 | 4.38E-01 |
| MORC3      | 7.09E+02 | 4.51E-01  | 2.19E-01 | 3.96E-02 | 4.38E-01 |
| OR52H1     | 3.05E+01 | 7.95E-01  | 3.86E-01 | 3.95E-02 | 4.38E-01 |
| RAB11FIP1  | 1.09E+03 | 7.16E-01  | 3.48E-01 | 3.96E-02 | 4.38E-01 |
| SLC44A1    | 1.63E+03 | -7.89E-01 | 3.83E-01 | 3.96E-02 | 4.38E-01 |
| TMEM161B   | 2.17E+02 | 3.93E-01  | 1.91E-01 | 3.96E-02 | 4.38E-01 |
| SPATA6L    | 2.78E+01 | -9.82E-01 | 4.77E-01 | 3.97E-02 | 4.38E-01 |
| TSIX       | 8.76E+00 | 1.11E+00  | 5.39E-01 | 3.97E-02 | 4.38E-01 |
| ADAM21     | 4.53E+00 | 1.09E+00  | 5.31E-01 | 3.99E-02 | 4.38E-01 |
| C21orf58   | 6.47E+01 | 5.96E-01  | 2.90E-01 | 3.98E-02 | 4.38E-01 |
| DKK2       | 2.83E+03 | -1.06E+00 | 5.16E-01 | 3.99E-02 | 4.38E-01 |
| FLNA       | 1.39E+04 | 6.08E-01  | 2.96E-01 | 3.99E-02 | 4.38E-01 |
| PPP4R4     | 1.41E+01 | 1.08E+00  | 5.25E-01 | 3.99E-02 | 4.38E-01 |
| TMUB2      | 3.94E+02 | -3.39E-01 | 1.65E-01 | 3.99E-02 | 4.38E-01 |
| TPM1       | 2.45E+03 | 7.12E-01  | 3.47E-01 | 3.99E-02 | 4.38E-01 |
| AKT2       | 1.75E+03 | 3.70E-01  | 1.81E-01 | 4.05E-02 | 4.40E-01 |
| ANO6       | 4.96E+03 | 7.79E-01  | 3.80E-01 | 4.06E-02 | 4.40E-01 |
| ASPHD1     | 3.38E+00 | -1.11E+00 | 5.42E-01 | 4.04E-02 | 4.40E-01 |
| ATXN3      | 3.80E+02 | 6.28E-01  | 3.06E-01 | 4.03E-02 | 4.40E-01 |
| ELMSAN1    | 9.72E+02 | 7.13E-01  | 3.48E-01 | 4.06E-02 | 4.40E-01 |
| FAM179B    | 5.38E+02 | 5.57E-01  | 2.72E-01 | 4.06E-02 | 4.40E-01 |
| GPR161     | 5.33E+02 | 6.84E-01  | 3.34E-01 | 4.06E-02 | 4.40E-01 |
| LOC1025462 | 1.78E+01 | -8.77E-01 | 4.28E-01 | 4.05E-02 | 4.40E-01 |
| MINOS1P1   | 1.27E+02 | 5.74E-01  | 2.80E-01 | 4.06E-02 | 4.40E-01 |
| MMRN1      | 1.92E+02 | 1.11E+00  | 5.43E-01 | 4.06E-02 | 4.40E-01 |
| NMNAT3     | 2.49E+01 | -1.11E+00 | 5.41E-01 | 4.04E-02 | 4.40E-01 |
| PBX2       | 8.22E+00 | 1.08E+00  | 5.25E-01 | 4.05E-02 | 4.40E-01 |
| PDIA4      | 1.68E+03 | -5.22E-01 | 2.55E-01 | 4.06E-02 | 4.40E-01 |
| S100A9     | 7.05E+01 | 1.08E+00  | 5.28E-01 | 4.06E-02 | 4.40E-01 |
| TBC1D24    | 3.89E+02 | 7.02E-01  | 3.42E-01 | 4.03E-02 | 4.40E-01 |
| TGM4       | 7.30E+00 | 1.10E+00  | 5.38E-01 | 4.06E-02 | 4.40E-01 |
| TMEM159    | 1.90E+02 | -6.87E-01 | 3.35E-01 | 4.03E-02 | 4.40E-01 |
| TXNIP      | 1.74E+04 | -8.62E-01 | 4.21E-01 | 4.06E-02 | 4.40E-01 |
| VAPB       | 1.36E+03 | 4.97E-01  | 2.43E-01 | 4.04E-02 | 4.40E-01 |
| ZNF335     | 4.51E+02 | 5.43E-01  | 2.65E-01 | 4.03E-02 | 4.40E-01 |
| PRND       | 4.43E+00 | 1.11E+00  | 5.44E-01 | 4.07E-02 | 4.40E-01 |
| FAM109B    | 1.25E+02 | -7.05E-01 | 3.45E-01 | 4.08E-02 | 4.41E-01 |
| ACTR10     | 3.80E+02 | 6.21E-01  | 3.04E-01 | 4.09E-02 | 4.41E-01 |
| CCDC93     | 8.88E+02 | -4.74E-01 | 2.32E-01 | 4.09E-02 | 4.41E-01 |
| CERS5      | 5.47E+02 | 3.76E-01  | 1.84E-01 | 4.08E-02 | 4.41E-01 |
| NSUN6      | 1.37E+02 | 4.02E-01  | 1.97E-01 | 4.09E-02 | 4.41E-01 |
| CNKSR3     | 3.34E+02 | 9.53E-01  | 4.66E-01 | 4.10E-02 | 4.41E-01 |
| DHFR       | 1.85E+02 | 5.72E-01  | 2.80E-01 | 4.12E-02 | 4.41E-01 |

|           |          |           |          |          |          |
|-----------|----------|-----------|----------|----------|----------|
| FAM86C1   | 4.64E+01 | -6.71E-01 | 3.29E-01 | 4.12E-02 | 4.41E-01 |
| GOLGA8R   | 4.54E+01 | -6.27E-01 | 3.07E-01 | 4.12E-02 | 4.41E-01 |
| HMOX1     | 1.82E+02 | -8.21E-01 | 4.02E-01 | 4.12E-02 | 4.41E-01 |
| MRPS9     | 1.87E+02 | -5.27E-01 | 2.58E-01 | 4.10E-02 | 4.41E-01 |
| NADK2     | 5.23E+02 | 5.40E-01  | 2.64E-01 | 4.12E-02 | 4.41E-01 |
| PRADC1    | 1.23E+02 | -7.39E-01 | 3.62E-01 | 4.11E-02 | 4.41E-01 |
| PSMD7     | 4.67E+02 | -4.07E-01 | 1.99E-01 | 4.10E-02 | 4.41E-01 |
| RGL1      | 8.68E+02 | -6.46E-01 | 3.17E-01 | 4.12E-02 | 4.41E-01 |
| TIPARP    | 1.53E+03 | 9.69E-01  | 4.75E-01 | 4.11E-02 | 4.41E-01 |
| WDR18     | 1.72E+02 | -6.31E-01 | 3.09E-01 | 4.11E-02 | 4.41E-01 |
| AGAP1     | 8.46E+02 | 6.70E-01  | 3.28E-01 | 4.14E-02 | 4.42E-01 |
| DGKB      | 2.93E+01 | 9.65E-01  | 4.73E-01 | 4.14E-02 | 4.42E-01 |
| RAPGEF1   | 1.14E+03 | 6.45E-01  | 3.16E-01 | 4.14E-02 | 4.42E-01 |
| GPM6A     | 4.41E+01 | -1.11E+00 | 5.42E-01 | 4.14E-02 | 4.42E-01 |
| LINC00282 | 2.02E+01 | 1.11E+00  | 5.43E-01 | 4.15E-02 | 4.42E-01 |
| PRELID2   | 6.68E+01 | 9.02E-01  | 4.42E-01 | 4.15E-02 | 4.43E-01 |
| HRASLS5   | 1.09E+01 | 1.10E+00  | 5.42E-01 | 4.16E-02 | 4.43E-01 |
| RSAD2     | 6.34E+01 | 7.28E-01  | 3.57E-01 | 4.16E-02 | 4.43E-01 |
| IQCC      | 2.59E+01 | 8.41E-01  | 4.13E-01 | 4.19E-02 | 4.45E-01 |
| PRRT3     | 8.77E+01 | -6.88E-01 | 3.38E-01 | 4.19E-02 | 4.45E-01 |
| TCF25     | 9.38E+02 | -4.01E-01 | 1.97E-01 | 4.20E-02 | 4.45E-01 |
| GPN3      | 1.35E+02 | -4.40E-01 | 2.16E-01 | 4.20E-02 | 4.46E-01 |
| TLR4      | 7.84E+02 | 5.72E-01  | 2.82E-01 | 4.20E-02 | 4.46E-01 |
| HIVEP3    | 1.41E+02 | -6.40E-01 | 3.15E-01 | 4.21E-02 | 4.46E-01 |
| ZNF850    | 1.20E+02 | 8.32E-01  | 4.10E-01 | 4.21E-02 | 4.46E-01 |
| SALL2     | 4.75E+02 | 6.89E-01  | 3.39E-01 | 4.22E-02 | 4.46E-01 |
| RPL23AP32 | 6.11E+01 | 6.93E-01  | 3.41E-01 | 4.22E-02 | 4.46E-01 |
| RPP25L    | 9.83E+01 | -6.65E-01 | 3.28E-01 | 4.22E-02 | 4.46E-01 |
| PHLDA1    | 9.70E+02 | 1.07E+00  | 5.27E-01 | 4.23E-02 | 4.46E-01 |
| FAM177A1  | 3.26E+02 | 7.07E-01  | 3.49E-01 | 4.24E-02 | 4.47E-01 |
| VTI1B     | 4.41E+02 | 6.12E-01  | 3.02E-01 | 4.24E-02 | 4.47E-01 |
| SFT2D2    | 2.56E+02 | 4.35E-01  | 2.14E-01 | 4.25E-02 | 4.48E-01 |
| CBFA2T2   | 1.31E+03 | 4.55E-01  | 2.24E-01 | 4.26E-02 | 4.48E-01 |
| NR2C1     | 7.11E+02 | 5.57E-01  | 2.75E-01 | 4.25E-02 | 4.48E-01 |
| ZNF704    | 2.22E+03 | -7.71E-01 | 3.80E-01 | 4.26E-02 | 4.48E-01 |
| TXNRD3    | 1.82E+02 | -4.77E-01 | 2.35E-01 | 4.27E-02 | 4.49E-01 |
| GSAP      | 4.93E+02 | -6.68E-01 | 3.30E-01 | 4.28E-02 | 4.50E-01 |
| KCNC4     | 2.41E+02 | 9.77E-01  | 4.83E-01 | 4.28E-02 | 4.50E-01 |
| BMP8A     | 1.05E+01 | 1.10E+00  | 5.44E-01 | 4.30E-02 | 4.50E-01 |
| CREB3L1   | 1.80E+02 | 1.07E+00  | 5.30E-01 | 4.30E-02 | 4.50E-01 |
| HSD11B1L  | 3.62E+01 | -9.15E-01 | 4.52E-01 | 4.30E-02 | 4.50E-01 |
| LINC00908 | 7.44E+00 | -1.06E+00 | 5.25E-01 | 4.30E-02 | 4.50E-01 |
| PLAGL1    | 5.16E+02 | 9.03E-01  | 4.46E-01 | 4.30E-02 | 4.50E-01 |
| SYS1      | 5.71E+02 | 5.41E-01  | 2.67E-01 | 4.30E-02 | 4.50E-01 |
| TMCO3     | 1.09E+03 | 5.23E-01  | 2.58E-01 | 4.29E-02 | 4.50E-01 |
| NAMPT     | 2.35E+03 | -7.34E-01 | 3.63E-01 | 4.31E-02 | 4.50E-01 |
| OAS3      | 5.21E+02 | 6.59E-01  | 3.26E-01 | 4.31E-02 | 4.50E-01 |
| GJC1      | 3.17E+02 | 8.63E-01  | 4.27E-01 | 4.32E-02 | 4.50E-01 |
| AURKA     | 4.68E+01 | 7.70E-01  | 3.81E-01 | 4.33E-02 | 4.51E-01 |
| PLA2G16   | 3.29E+02 | 6.45E-01  | 3.19E-01 | 4.32E-02 | 4.51E-01 |
| ADRA1A    | 2.74E+01 | -1.07E+00 | 5.29E-01 | 4.35E-02 | 4.51E-01 |
| ALPK1     | 3.38E+02 | -4.97E-01 | 2.46E-01 | 4.36E-02 | 4.51E-01 |
| ARF6      | 7.33E+02 | 5.39E-01  | 2.67E-01 | 4.37E-02 | 4.51E-01 |

|              |          |           |          |          |          |
|--------------|----------|-----------|----------|----------|----------|
| ARL5A        | 1.55E+03 | -5.30E-01 | 2.62E-01 | 4.34E-02 | 4.51E-01 |
| BACE1        | 1.15E+03 | -5.44E-01 | 2.70E-01 | 4.38E-02 | 4.51E-01 |
| CNPY3        | 5.74E+02 | -4.42E-01 | 2.19E-01 | 4.37E-02 | 4.51E-01 |
| CTSO         | 7.37E+02 | -6.62E-01 | 3.28E-01 | 4.36E-02 | 4.51E-01 |
| HIBADH       | 3.58E+02 | -6.13E-01 | 3.04E-01 | 4.35E-02 | 4.51E-01 |
| MED12L       | 1.00E+02 | 8.59E-01  | 4.26E-01 | 4.37E-02 | 4.51E-01 |
| MEIS3P1      | 2.92E+02 | -5.63E-01 | 2.79E-01 | 4.37E-02 | 4.51E-01 |
| MGA          | 1.60E+03 | 4.28E-01  | 2.12E-01 | 4.33E-02 | 4.51E-01 |
| PLBD2        | 4.03E+02 | 8.44E-01  | 4.18E-01 | 4.33E-02 | 4.51E-01 |
| POSTN        | 6.29E+02 | 1.10E+00  | 5.45E-01 | 4.38E-02 | 4.51E-01 |
| RASGRF2      | 1.06E+03 | 8.78E-01  | 4.35E-01 | 4.35E-02 | 4.51E-01 |
| SETDB2       | 2.94E+02 | 4.65E-01  | 2.30E-01 | 4.35E-02 | 4.51E-01 |
| TDRD3        | 4.84E+02 | 3.81E-01  | 1.89E-01 | 4.36E-02 | 4.51E-01 |
| ZFHX4        | 1.10E+03 | -7.15E-01 | 3.54E-01 | 4.36E-02 | 4.51E-01 |
| KCNJ2-AS1    | 2.82E+01 | -9.48E-01 | 4.70E-01 | 4.39E-02 | 4.51E-01 |
| MDGA2        | 1.29E+02 | -1.09E+00 | 5.41E-01 | 4.39E-02 | 4.51E-01 |
| SHROOM2      | 1.29E+02 | 9.97E-01  | 4.95E-01 | 4.39E-02 | 4.52E-01 |
| TNFRSF10D    | 1.09E+02 | 1.02E+00  | 5.09E-01 | 4.40E-02 | 4.53E-01 |
| URB1         | 2.42E+03 | 6.10E-01  | 3.03E-01 | 4.41E-02 | 4.53E-01 |
| UNG          | 3.79E+02 | -3.54E-01 | 1.76E-01 | 4.41E-02 | 4.53E-01 |
| NXPH4        | 5.18E+02 | 8.22E-01  | 4.08E-01 | 4.42E-02 | 4.53E-01 |
| RSPH4A       | 1.36E+01 | -1.03E+00 | 5.11E-01 | 4.42E-02 | 4.53E-01 |
| CADPS2       | 1.30E+03 | -8.79E-01 | 4.37E-01 | 4.44E-02 | 4.53E-01 |
| GRHL1        | 2.57E+02 | 9.71E-01  | 4.83E-01 | 4.44E-02 | 4.53E-01 |
| SERTAD4      | 7.28E+01 | -1.03E+00 | 5.12E-01 | 4.43E-02 | 4.53E-01 |
| SPIRE2       | 8.40E+01 | -8.18E-01 | 4.07E-01 | 4.43E-02 | 4.53E-01 |
| ZFP14        | 2.81E+02 | 5.33E-01  | 2.65E-01 | 4.43E-02 | 4.53E-01 |
| BAX          | 2.66E+02 | 4.76E-01  | 2.37E-01 | 4.45E-02 | 4.54E-01 |
| TTLL5        | 4.04E+02 | 5.66E-01  | 2.82E-01 | 4.45E-02 | 4.54E-01 |
| FAM155A      | 5.84E+01 | 1.05E+00  | 5.22E-01 | 4.46E-02 | 4.55E-01 |
| PVR          | 3.80E+02 | 7.20E-01  | 3.59E-01 | 4.46E-02 | 4.55E-01 |
| FAM229B      | 1.72E+02 | -7.78E-01 | 3.88E-01 | 4.47E-02 | 4.55E-01 |
| ADAMTSL4-AS1 | 6.15E+01 | 6.28E-01  | 3.13E-01 | 4.50E-02 | 4.57E-01 |
| PNN          | 8.95E+02 | 4.99E-01  | 2.49E-01 | 4.50E-02 | 4.57E-01 |
| SLC8A3       | 5.74E+00 | 1.08E+00  | 5.41E-01 | 4.50E-02 | 4.57E-01 |
| C20orf194    | 9.86E+02 | 7.00E-01  | 3.49E-01 | 4.51E-02 | 4.57E-01 |
| IFT140       | 5.03E+02 | -6.56E-01 | 3.27E-01 | 4.51E-02 | 4.57E-01 |
| MAP2         | 2.70E+02 | 1.02E+00  | 5.11E-01 | 4.51E-02 | 4.57E-01 |
| YAP1         | 3.24E+03 | 4.67E-01  | 2.33E-01 | 4.50E-02 | 4.57E-01 |
| FAM217B      | 3.80E+02 | 4.93E-01  | 2.46E-01 | 4.52E-02 | 4.58E-01 |
| ZNF792       | 1.35E+02 | 7.74E-01  | 3.86E-01 | 4.52E-02 | 4.58E-01 |
| LRRC16B      | 1.81E+01 | 9.48E-01  | 4.73E-01 | 4.52E-02 | 4.58E-01 |
| GPR132       | 4.87E+01 | -9.35E-01 | 4.67E-01 | 4.53E-02 | 4.58E-01 |
| CRB2         | 1.43E+02 | 9.52E-01  | 4.76E-01 | 4.55E-02 | 4.59E-01 |
| DDX56        | 5.66E+02 | -4.69E-01 | 2.35E-01 | 4.57E-02 | 4.59E-01 |
| HBB          | 1.13E+03 | 1.07E+00  | 5.33E-01 | 4.55E-02 | 4.59E-01 |
| LINC00880    | 3.30E+00 | 1.01E+00  | 5.07E-01 | 4.57E-02 | 4.59E-01 |
| NTHL1        | 7.31E+01 | -6.72E-01 | 3.36E-01 | 4.56E-02 | 4.59E-01 |
| PPP2R3C      | 1.03E+02 | 6.58E-01  | 3.29E-01 | 4.56E-02 | 4.59E-01 |
| RNF180       | 1.48E+02 | 1.01E+00  | 5.07E-01 | 4.55E-02 | 4.59E-01 |
| SARDH        | 8.47E+01 | -1.02E+00 | 5.08E-01 | 4.56E-02 | 4.59E-01 |
| SEMA3B       | 2.14E+03 | -7.22E-01 | 3.62E-01 | 4.57E-02 | 4.59E-01 |
| SRC          | 4.79E+02 | 6.21E-01  | 3.11E-01 | 4.55E-02 | 4.59E-01 |

|            |          |           |          |          |          |
|------------|----------|-----------|----------|----------|----------|
| UBXN2B     | 7.60E+02 | -5.26E-01 | 2.63E-01 | 4.57E-02 | 4.59E-01 |
| WBP4       | 1.84E+02 | 5.28E-01  | 2.64E-01 | 4.56E-02 | 4.59E-01 |
| RBL1       | 1.30E+02 | 5.67E-01  | 2.84E-01 | 4.58E-02 | 4.59E-01 |
| MKI67      | 5.83E+02 | 7.30E-01  | 3.66E-01 | 4.59E-02 | 4.59E-01 |
| NCOA6      | 1.24E+03 | 5.22E-01  | 2.61E-01 | 4.58E-02 | 4.59E-01 |
| EBAG9      | 3.51E+02 | -6.05E-01 | 3.03E-01 | 4.60E-02 | 4.60E-01 |
| RNF138P1   | 3.81E+02 | 8.08E-01  | 4.05E-01 | 4.60E-02 | 4.60E-01 |
| GHR        | 4.73E+02 | 6.90E-01  | 3.46E-01 | 4.63E-02 | 4.63E-01 |
| ADAM9      | 2.29E+03 | -7.22E-01 | 3.62E-01 | 4.63E-02 | 4.63E-01 |
| C5orf51    | 5.91E+02 | 3.46E-01  | 1.74E-01 | 4.63E-02 | 4.63E-01 |
| CWF19L1    | 2.03E+02 | 5.19E-01  | 2.61E-01 | 4.66E-02 | 4.63E-01 |
| EDIL3      | 1.15E+02 | 1.02E+00  | 5.15E-01 | 4.66E-02 | 4.63E-01 |
| EIF3G      | 7.99E+02 | -4.85E-01 | 2.44E-01 | 4.66E-02 | 4.63E-01 |
| GBP1P1     | 2.79E+00 | -1.08E+00 | 5.45E-01 | 4.66E-02 | 4.63E-01 |
| GNAS       | 9.37E+03 | 3.86E-01  | 1.94E-01 | 4.66E-02 | 4.63E-01 |
| KDM5A      | 2.10E+03 | 5.70E-01  | 2.86E-01 | 4.64E-02 | 4.63E-01 |
| LINC00158  | 3.85E+00 | 1.08E+00  | 5.45E-01 | 4.66E-02 | 4.63E-01 |
| LOC1019274 | 3.63E+01 | 5.95E-01  | 2.99E-01 | 4.66E-02 | 4.63E-01 |
| LOC286189  | 1.37E+03 | -1.08E+00 | 5.41E-01 | 4.65E-02 | 4.63E-01 |
| NIPAL2     | 3.57E+02 | -6.99E-01 | 3.51E-01 | 4.65E-02 | 4.63E-01 |
| PCDH1      | 1.95E+02 | 9.72E-01  | 4.88E-01 | 4.66E-02 | 4.63E-01 |
| CRELD2     | 1.49E+02 | -6.41E-01 | 3.23E-01 | 4.67E-02 | 4.63E-01 |
| RHBDF2     | 4.25E+02 | -8.16E-01 | 4.10E-01 | 4.68E-02 | 4.63E-01 |
| DAGLA      | 9.93E+01 | 6.40E-01  | 3.22E-01 | 4.69E-02 | 4.64E-01 |
| DNAJC9     | 1.83E+02 | 4.47E-01  | 2.25E-01 | 4.69E-02 | 4.64E-01 |
| ST8SIA4    | 2.10E+02 | -7.37E-01 | 3.71E-01 | 4.69E-02 | 4.64E-01 |
| TCEAL8     | 5.08E+02 | 3.22E-01  | 1.62E-01 | 4.69E-02 | 4.64E-01 |
| LRRC8E     | 4.86E+01 | -7.57E-01 | 3.81E-01 | 4.70E-02 | 4.64E-01 |
| DCAF4      | 9.65E+01 | 7.29E-01  | 3.67E-01 | 4.71E-02 | 4.65E-01 |
| EVA1C      | 2.31E+02 | 8.46E-01  | 4.26E-01 | 4.71E-02 | 4.65E-01 |
| SETBP1     | 2.48E+03 | 6.21E-01  | 3.13E-01 | 4.71E-02 | 4.65E-01 |
| SEC14L1P1  | 9.48E+01 | 5.40E-01  | 2.72E-01 | 4.72E-02 | 4.65E-01 |
| LOC642852  | 4.25E+02 | 6.92E-01  | 3.49E-01 | 4.72E-02 | 4.65E-01 |
| IL6        | 6.82E+00 | -1.08E+00 | 5.45E-01 | 4.73E-02 | 4.65E-01 |
| SLC38A1    | 4.11E+03 | -1.03E+00 | 5.17E-01 | 4.74E-02 | 4.65E-01 |
| SPPL2A     | 8.13E+02 | -3.46E-01 | 1.74E-01 | 4.74E-02 | 4.65E-01 |
| ZC4H2      | 3.85E+02 | 4.88E-01  | 2.46E-01 | 4.74E-02 | 4.65E-01 |
| SIK1       | 1.75E+03 | -9.50E-01 | 4.79E-01 | 4.74E-02 | 4.65E-01 |
| EEPD1      | 1.51E+02 | 8.83E-01  | 4.46E-01 | 4.75E-02 | 4.65E-01 |
| TANGO6     | 2.31E+02 | -4.02E-01 | 2.03E-01 | 4.75E-02 | 4.65E-01 |
| CLEC17A    | 5.12E+00 | -1.07E+00 | 5.43E-01 | 4.76E-02 | 4.66E-01 |
| CTR9       | 9.08E+02 | -3.30E-01 | 1.66E-01 | 4.76E-02 | 4.66E-01 |
| FAM21EP    | 4.37E+00 | 1.07E+00  | 5.43E-01 | 4.76E-02 | 4.66E-01 |
| TMEM158    | 3.00E+01 | 1.07E+00  | 5.41E-01 | 4.76E-02 | 4.66E-01 |
| PPP1R14A   | 1.03E+01 | -1.07E+00 | 5.39E-01 | 4.78E-02 | 4.67E-01 |
| CYP39A1    | 8.34E+01 | -1.01E+00 | 5.09E-01 | 4.79E-02 | 4.68E-01 |
| ZNF581     | 1.46E+02 | 4.47E-01  | 2.26E-01 | 4.80E-02 | 4.69E-01 |
| SPATA2L    | 5.34E+01 | -8.01E-01 | 4.05E-01 | 4.81E-02 | 4.69E-01 |
| LCP2       | 2.27E+02 | -6.63E-01 | 3.36E-01 | 4.82E-02 | 4.69E-01 |
| SLX4IP     | 7.55E+01 | 4.91E-01  | 2.48E-01 | 4.82E-02 | 4.70E-01 |
| FAM160B2   | 5.77E+02 | -4.79E-01 | 2.43E-01 | 4.83E-02 | 4.70E-01 |
| BTK        | 8.21E+01 | -8.41E-01 | 4.26E-01 | 4.87E-02 | 4.71E-01 |
| CDH24      | 3.24E+02 | 6.49E-01  | 3.29E-01 | 4.84E-02 | 4.71E-01 |

|             |          |           |          |          |          |
|-------------|----------|-----------|----------|----------|----------|
| DOK1        | 1.81E+02 | -5.93E-01 | 3.00E-01 | 4.85E-02 | 4.71E-01 |
| GDA         | 4.86E+00 | 1.05E+00  | 5.31E-01 | 4.85E-02 | 4.71E-01 |
| LOC284412   | 1.25E+01 | 1.03E+00  | 5.23E-01 | 4.86E-02 | 4.71E-01 |
| MMP21       | 6.30E+00 | -1.07E+00 | 5.44E-01 | 4.86E-02 | 4.71E-01 |
| N4BP2L2-IT2 | 6.10E+02 | 5.09E-01  | 2.58E-01 | 4.85E-02 | 4.71E-01 |
| NCKAP1L     | 4.67E+02 | -7.67E-01 | 3.89E-01 | 4.86E-02 | 4.71E-01 |
| NID2        | 4.08E+03 | 9.13E-01  | 4.63E-01 | 4.84E-02 | 4.71E-01 |
| PRPH2       | 1.05E+02 | -7.72E-01 | 3.92E-01 | 4.86E-02 | 4.71E-01 |
| RASL10B     | 1.33E+02 | 1.06E+00  | 5.37E-01 | 4.85E-02 | 4.71E-01 |
| ANKRD36BP1  | 1.00E+01 | 1.07E+00  | 5.44E-01 | 4.88E-02 | 4.71E-01 |
| CALB1       | 3.53E+02 | -1.03E+00 | 5.22E-01 | 4.88E-02 | 4.71E-01 |
| CBS         | 3.06E+02 | 7.92E-01  | 4.02E-01 | 4.89E-02 | 4.71E-01 |
| CHAF1B      | 5.00E+01 | 8.25E-01  | 4.19E-01 | 4.89E-02 | 4.71E-01 |
| FOXP1       | 5.60E+03 | -6.02E-01 | 3.06E-01 | 4.89E-02 | 4.71E-01 |
| GIPR        | 2.87E+00 | -1.04E+00 | 5.29E-01 | 4.89E-02 | 4.71E-01 |
| KARS        | 8.98E+02 | -4.85E-01 | 2.46E-01 | 4.88E-02 | 4.71E-01 |
| SEMA5B      | 3.71E+01 | 9.90E-01  | 5.03E-01 | 4.89E-02 | 4.71E-01 |
| TSC22D2     | 8.77E+02 | -4.22E-01 | 2.14E-01 | 4.89E-02 | 4.71E-01 |
| LEPREL2     | 5.26E+02 | -6.89E-01 | 3.50E-01 | 4.90E-02 | 4.71E-01 |
| EFNA2       | 7.66E+00 | -1.04E+00 | 5.27E-01 | 4.91E-02 | 4.72E-01 |
| DLEC1       | 6.98E+01 | -9.48E-01 | 4.82E-01 | 4.92E-02 | 4.72E-01 |
| MOCS3       | 1.25E+02 | 5.42E-01  | 2.75E-01 | 4.92E-02 | 4.72E-01 |
| TENM1       | 3.03E+01 | 1.02E+00  | 5.20E-01 | 4.92E-02 | 4.72E-01 |
| ZWINT       | 7.19E+01 | 7.43E-01  | 3.78E-01 | 4.92E-02 | 4.72E-01 |
| ADORA3      | 2.82E+02 | -9.19E-01 | 4.68E-01 | 4.93E-02 | 4.72E-01 |
| CDS1        | 1.04E+02 | 8.53E-01  | 4.34E-01 | 4.93E-02 | 4.72E-01 |
| OTUD5       | 6.62E+02 | 2.49E-01  | 1.27E-01 | 4.93E-02 | 4.72E-01 |
| WBP5        | 6.11E+02 | 6.30E-01  | 3.21E-01 | 4.94E-02 | 4.72E-01 |
| ST6GALNAC4  | 3.39E+02 | -7.39E-01 | 3.76E-01 | 4.94E-02 | 4.72E-01 |
| ANKRD23     | 8.39E+01 | -5.21E-01 | 2.65E-01 | 4.96E-02 | 4.73E-01 |
| CEP290      | 9.03E+02 | 4.44E-01  | 2.26E-01 | 4.96E-02 | 4.73E-01 |
| FOXN3       | 2.67E+03 | 8.21E-01  | 4.18E-01 | 4.96E-02 | 4.73E-01 |
| ZNF334      | 4.20E+02 | 5.22E-01  | 2.66E-01 | 4.96E-02 | 4.73E-01 |
| PTGES       | 1.84E+02 | -9.80E-01 | 4.99E-01 | 4.97E-02 | 4.74E-01 |
| A1BG        | 7.81E+00 | -1.05E+00 | 5.35E-01 | 4.99E-02 | 4.74E-01 |
| PARP11      | 1.43E+02 | 7.20E-01  | 3.67E-01 | 5.00E-02 | 4.74E-01 |
| QSOX2       | 2.37E+02 | -5.64E-01 | 2.88E-01 | 4.99E-02 | 4.74E-01 |
| SPRYD7      | 1.22E+02 | 6.35E-01  | 3.24E-01 | 4.99E-02 | 4.74E-01 |
| TRDN        | 9.02E+00 | -9.99E-01 | 5.09E-01 | 5.00E-02 | 4.74E-01 |
